# Supplementary material for: Transcriptome Characterization by RNA-seq Unravels the Mechanisms of Butyrate-Induced Epigenomic Regulation in Bovine Cells
Source: PLoS One. 2012 May 15;7(5):e36940. doi: 10.1371/journal.pone.0036940 (PMC3352864; doi:10.1371/journal.pone.0036940)
Supplement: Table S1 — Transcriptomic analysis of butyrate-induced changes. (XLSX) [file pone.0036940.s001.xlsx]

## Sheet: gene_exp
test_id	gene_id	gene	locus	sample_1 (BT)	sample_2 (CT)	status	value_1 (BT)	value_2 (Control)	log2(fold_change)	V1/V2 ratio	fold_change	test_stat	p_value	q_value (FDR)	significant
ENSBTAG00000026461	ENSBTAG00000026461	CACNA1H	25:959757-984950	q1	q2	OK	32.7578	0.0265233	-10.2704	1235.06	0.000809658	16.2429	0	0	yes
ENSBTAG00000022501	ENSBTAG00000022501	NXF3	X:56352218-56473249	q1	q2	OK	21.9781	0.0213836	-10.0053	1027.8	0.000972982	6.54596	5.91127e-11	1.69244e-10	yes
ENSBTAG00000014645	ENSBTAG00000014645	CNTN2	16:2654176-2683555	q1	q2	OK	7.0452	0.008317	-9.72636	847.084	0.00118052	6.17859	6.46755e-10	1.74745e-09	yes
ENSBTAG00000007036	ENSBTAG00000007036	VGLU1_BOVIN	18:56343317-56354548	q1	q2	OK	19.1344	0.0240406	-9.63648	795.92	0.00125641	8.37551	0	0	yes
ENSBTAG00000011207	ENSBTAG00000011207	CNN1_BOVIN	7:17106393-17114222	q1	q2	OK	48.3417	0.0706291	-9.41879	684.445	0.00146104	10.0716	0	0	yes
ENSBTAG00000006730	ENSBTAG00000006730	Q0V7N1_BOVIN	17:73408383-73415618	q1	q2	OK	23.5752	0.0385325	-9.25698	611.826	0.00163445	12.1318	0	0	yes
ENSBTAG00000026326	ENSBTAG00000026326	A6QQP5_BOVIN	25:26765630-26769345	q1	q2	OK	46.1094	0.0757505	-9.24959	608.701	0.00164284	17.5922	0	0	yes
ENSBTAG00000000828	ENSBTAG00000000828	CAPN6	X:64684213-64708869	q1	q2	OK	11.554	0.0210784	-9.09842	548.144	0.00182433	7.55418	4.21885e-14	1.41044e-13	yes
ENSBTAG00000020341	ENSBTAG00000020341	MOV10L1	5:121099142-121164873	q1	q2	OK	1.13792	0.00209477	-9.08539	543.22	0.00184088	1.57459	0.11535	0.151626	no
ENSBTAG00000035018	ENSBTAG00000035018	ZCH12_BOVIN	X:3126451-3129071	q1	q2	OK	11.5917	0.0217391	-9.05858	533.219	0.00187541	6.13161	8.69949e-10	2.33652e-09	yes
ENSBTAG00000020880	ENSBTAG00000020880	C10H14orf37	10:70578794-70720977	q1	q2	OK	14.5148	0.0293447	-8.95021	494.631	0.00202171	9.28527	0	0	yes
ENSBTAG00000013066	ENSBTAG00000013066	IGF2_BOVIN	29:50046625-50065230	q1	q2	OK	230.968	0.48183	-8.90495	479.356	0.00208614	21.5711	0	0	yes
ENSBTAG00000000570	ENSBTAG00000000570	RET	28:13562992-13615888	q1	q2	OK	6.64285	0.0142905	-8.86061	464.844	0.00215125	5.86906	4.38286e-09	1.12514e-08	yes
ENSBTAG00000022502	ENSBTAG00000022502	-	X:57349791-57355477	q1	q2	OK	8.58007	0.0191743	-8.80567	447.478	0.00223475	5.75434	8.69828e-09	2.19114e-08	yes
ENSBTAG00000048086	ENSBTAG00000048086	-	X:60843083-60858779	q1	q2	OK	32.1467	0.0795242	-8.65906	404.238	0.00247379	9.15899	0	0	yes
ENSBTAG00000000244	ENSBTAG00000000244	NRXN2	29:43476402-43576128	q1	q2	OK	5.17182	0.013176	-8.61661	392.518	0.00254766	8.15485	4.44089e-16	1.61874e-15	yes
ENSBTAG00000010856	ENSBTAG00000010856	SLC8A2	18:54853502-54881796	q1	q2	OK	7.83616	0.0206488	-8.56794	379.497	0.00263508	5.45251	4.96644e-08	1.19359e-07	yes
ENSBTAG00000011851	ENSBTAG00000011851	FYN_BOVIN	9:39107806-39259883	q1	q2	OK	12.5048	0.0344789	-8.50255	362.68	0.00275726	8.85844	0	0	yes
ENSBTAG00000003054	ENSBTAG00000003054	INSRR	3:14039799-14055462	q1	q2	OK	7.61113	0.0247545	-8.26427	307.465	0.00325242	9.10498	0	0	yes
ENSBTAG00000010179	ENSBTAG00000010179	COL5A3	7:15769154-15811269	q1	q2	OK	32.2573	0.108678	-8.21342	296.815	0.0033691	25.2149	0	0	yes
ENSBTAG00000021829	ENSBTAG00000021829	GM2A	7:64499095-64511547	q1	q2	OK	108.852	0.373746	-8.18609	291.246	0.00343353	15.9608	0	0	yes
ENSBTAG00000019131	ENSBTAG00000019131	CELF3_BOVIN	3:19105093-19119703	q1	q2	OK	3.83321	0.0139272	-8.10451	275.232	0.00363328	3.62509	0.000288858	0.000517309	yes
ENSBTAG00000020979	ENSBTAG00000020979	A5PJV7_BOVIN	19:37725130-37744573	q1	q2	OK	13.6288	0.0501975	-8.08483	271.504	0.00368319	12.4077	0	0	yes
ENSBTAG00000047380	ENSBTAG00000047380	CALC_BOVIN	15:38041579-38044615	q1	q2	OK	85.0953	0.327115	-8.02314	260.139	0.0038441	13.8207	0	0	yes
ENSBTAG00000003060	ENSBTAG00000003060	F1MC14_BOVIN	3:14019443-14037555	q1	q2	OK	3.14236	0.0123226	-7.99439	255.008	0.00392147	5.21956	1.79351e-07	4.15388e-07	yes
ENSBTAG00000004630	ENSBTAG00000004630	COMP	7:4354379-4361950	q1	q2	OK	6.57827	0.0260942	-7.97784	252.097	0.00396671	6.06469	1.32212e-09	3.50812e-09	yes
ENSBTAG00000000595	ENSBTAG00000000595	FBN3	7:18006364-18076590	q1	q2	OK	1.10082	0.00455022	-7.91843	241.927	0.00413347	5.17443	2.28607e-07	5.26096e-07	yes
ENSBTAG00000007235	ENSBTAG00000007235	A5PKI5_BOVIN	11:102286503-102356914	q1	q2	OK	2.80817	0.0119567	-7.87566	234.862	0.00425785	3.44033	0.000580999	0.00101228	yes
ENSBTAG00000007955	ENSBTAG00000007955	SE6L2_BOVIN	25:26620087-26640306	q1	q2	OK	2.10011	0.00922115	-7.8313	227.749	0.0043908	5.11194	3.18875e-07	7.25418e-07	yes
ENSBTAG00000015919	ENSBTAG00000015919	Q0II30_BOVIN	6:91597121-91723390	q1	q2	OK	12.0522	0.053074	-7.82708	227.083	0.00440366	6.55878	5.42515e-11	1.55518e-10	yes
ENSBTAG00000046250	ENSBTAG00000046250	MIOX	5:119926285-120032065	q1	q2	OK	14.7986	0.06566	-7.81623	225.382	0.00443691	2.48211	0.0130605	0.0196023	yes
ENSBTAG00000031647	ENSBTAG00000031647	Q2KIF2_BOVIN	7:20812033-20814992	q1	q2	OK	5.03331	0.0225499	-7.80224	223.208	0.00448014	4.43541	9.18959e-06	1.87833e-05	yes
ENSBTAG00000013155	ENSBTAG00000013155	CO2A1_BOVIN	5:32450297-32481276	q1	q2	OK	1.83277	0.00826795	-7.79228	221.672	0.00451118	4.18973	2.79288e-05	5.49257e-05	yes
ENSBTAG00000038600	ENSBTAG00000038600	LRRC15	1:73785483-73787238	q1	q2	OK	7.79633	0.0361673	-7.75196	215.563	0.00463903	6.05188	1.43164e-09	3.78821e-09	yes
ENSBTAG00000045610	ENSBTAG00000045610	CACNA1I	5:111524746-111610218	q1	q2	OK	0.69203	0.00326356	-7.72824	212.048	0.00471594	1.81262	0.0698901	0.0949772	no
ENSBTAG00000006035	ENSBTAG00000006035	PPR1B_BOVIN	19:40655221-40663767	q1	q2	OK	14.3246	0.067878	-7.72134	211.035	0.00473855	9.4175	0	0	yes
ENSBTAG00000012682	ENSBTAG00000012682	UNC13A	7:5396670-5452286	q1	q2	OK	2.5066	0.0118837	-7.7206	210.928	0.00474098	6.34708	2.19447e-10	6.09521e-10	yes
ENSBTAG00000020896	ENSBTAG00000020896	-	25:41349161-41350363	q1	q2	OK	14.5219	0.0693554	-7.71001	209.384	0.00477591	4.88873	1.01489e-06	2.23051e-06	yes
ENSBTAG00000018635	ENSBTAG00000018635	ATP1A3	18:51587792-51603479	q1	q2	OK	7.58597	0.0362883	-7.70769	209.047	0.00478359	8.69719	0	0	yes
ENSBTAG00000003014	ENSBTAG00000003014	Q5EA32_BOVIN	19:33816539-33834542	q1	q2	OK	7.37132	0.0359578	-7.67948	204.999	0.00487805	7.72158	1.15463e-14	3.96947e-14	yes
ENSBTAG00000047581	ENSBTAG00000047581	-	X:127191568-127192600	q1	q2	OK	3.84979	0.0191263	-7.65308	201.283	0.00496813	2.91947	0.00350625	0.00562798	yes
ENSBTAG00000019079	ENSBTAG00000019079	PLCB2	10:36024407-36044688	q1	q2	OK	2.50736	0.0126742	-7.62814	197.832	0.00505477	5.67518	1.38542e-08	3.44828e-08	yes
ENSBTAG00000047491	ENSBTAG00000047491	CACNA1S	16:81471757-81527931	q1	q2	OK	9.53913	0.050831	-7.552	187.664	0.0053287	15.2322	0	0	yes
ENSBTAG00000009489	ENSBTAG00000009489	CACNA2D2	22:50538716-50555513	q1	q2	OK	1.87316	0.010072	-7.53898	185.977	0.00537701	4.77908	1.76096e-06	3.80443e-06	yes
ENSBTAG00000026768	ENSBTAG00000026768	TH	29:50027264-50034123	q1	q2	OK	6.22196	0.0337486	-7.5264	184.362	0.0054241	5.29242	1.20706e-07	2.82539e-07	yes
ENSBTAG00000007741	ENSBTAG00000007741	CRLF1	7:4522622-4530594	q1	q2	OK	8.45227	0.0463283	-7.5113	182.443	0.00548117	5.18304	2.18296e-07	5.02724e-07	yes
ENSBTAG00000021215	ENSBTAG00000021215	VWA5A	29:27194433-27221901	q1	q2	OK	4.68579	0.0257139	-7.5096	182.228	0.00548763	6.06414	1.32659e-09	3.51825e-09	yes
ENSBTAG00000016276	ENSBTAG00000016276	HUTH_BOVIN	5:60618662-60641990	q1	q2	OK	8.86231	0.0487924	-7.50488	181.633	0.00550562	11.8258	0	0	yes
ENSBTAG00000012748	ENSBTAG00000012748	-	X:34800751-34801780	q1	q2	OK	11.7304	0.0658738	-7.47633	178.074	0.00561565	6.89758	5.28955e-12	1.595e-11	yes
ENSBTAG00000000970	ENSBTAG00000000970	F1MTH0_BOVIN	5:29981932-30005379	q1	q2	OK	5.83967	0.0340907	-7.42036	171.298	0.0058378	5.56099	2.68255e-08	6.56139e-08	yes
ENSBTAG00000015938	ENSBTAG00000015938	ARAP3	7:54285454-54453900	q1	q2	OK	0.943306	0.0055817	-7.40088	169	0.00591716	4.43366	9.26451e-06	1.89317e-05	yes
ENSBTAG00000044073	ENSBTAG00000044073	CD248	29:45016283-45018614	q1	q2	OK	4.11298	0.0243524	-7.39998	168.894	0.00592085	5.20269	1.96429e-07	4.53391e-07	yes
ENSBTAG00000010661	ENSBTAG00000010661	A7MBI5_BOVIN	7:60588658-60703487	q1	q2	OK	6.54603	0.0391305	-7.38618	167.287	0.00597776	8.79823	0	0	yes
ENSBTAG00000017116	ENSBTAG00000017116	A2VDP3_BOVIN	5:74106328-74117622	q1	q2	OK	5.64931	0.0339556	-7.37828	166.373	0.00601058	8.63621	0	0	yes
ENSBTAG00000014232	ENSBTAG00000014232	GAL3ST1	17:71660018-71678806	q1	q2	OK	3.08831	0.0187223	-7.36592	164.954	0.0060623	4.80438	1.5523e-06	3.3684e-06	yes
ENSBTAG00000001474	ENSBTAG00000001474	NEUG_BOVIN	29:28587899-28594897	q1	q2	OK	15.2118	0.0922538	-7.36536	164.891	0.00606465	5.37391	7.70462e-08	1.82816e-07	yes
ENSBTAG00000014538	ENSBTAG00000014538	HPCL4_BOVIN	3:106976316-106988248	q1	q2	OK	13.5537	0.0823149	-7.36332	164.657	0.00607323	17.7317	0	0	yes
ENSBTAG00000001301	ENSBTAG00000001301	LRRC32	15:56827091-56834190	q1	q2	OK	2.73301	0.017171	-7.31438	159.164	0.00628279	3.82005	0.000133423	0.000246231	yes
ENSBTAG00000008129	ENSBTAG00000008129	CSTN3_BOVIN	5:103581387-103611327	q1	q2	OK	42	0.263898	-7.31426	159.152	0.00628331	28.678	0	0	yes
ENSBTAG00000000552	ENSBTAG00000000552	DISP2	10:36092994-36103677	q1	q2	OK	1.19906	0.00771952	-7.27918	155.328	0.00643796	3.82503	0.000130758	0.000241586	yes
ENSBTAG00000006385	ENSBTAG00000006385	BAI1	14:2948971-3014380	q1	q2	OK	1.49595	0.0101609	-7.20189	147.226	0.00679227	4.998	5.7929e-07	1.29413e-06	yes
ENSBTAG00000011381	ENSBTAG00000011381	ZNT3_BOVIN	11:72364681-72373190	q1	q2	OK	5.011	0.0348879	-7.16623	143.631	0.00696225	6.14164	8.16728e-10	2.1983e-09	yes
ENSBTAG00000020415	ENSBTAG00000020415	F1MLB5_BOVIN	18:57360331-57364101	q1	q2	OK	5.95265	0.041999	-7.14703	141.733	0.00705553	4.52728	5.97469e-06	1.24006e-05	yes
ENSBTAG00000027434	ENSBTAG00000027434	SORCS2	6:118880490-118928275	q1	q2	OK	4.82995	0.0350247	-7.10749	137.901	0.00725157	5.99039	2.09344e-09	5.47349e-09	yes
ENSBTAG00000017704	ENSBTAG00000017704	ABCG2_BOVIN	6:37913109-38030583	q1	q2	OK	2.13788	0.01601	-7.06106	133.534	0.00748875	3.20419	0.00135444	0.00226898	yes
ENSBTAG00000011092	ENSBTAG00000011092	KNDC1	26:50793560-50837647	q1	q2	OK	0.878478	0.00664507	-7.04658	132.2	0.00756429	3.48004	0.000501347	0.000878303	yes
ENSBTAG00000011043	ENSBTAG00000011043	RAC2_BOVIN	5:76033362-76050218	q1	q2	OK	7.25665	0.0551673	-7.03935	131.539	0.00760229	6.98228	2.90412e-12	8.89722e-12	yes
ENSBTAG00000000140	ENSBTAG00000000140	Q3ZCJ6_BOVIN	16:29585791-29624037	q1	q2	OK	33.9835	0.270457	-6.97329	125.652	0.00795849	17.6433	0	0	yes
ENSBTAG00000012419	ENSBTAG00000012419	B2L15_BOVIN	3:29643175-29648016	q1	q2	OK	37.5665	0.30363	-6.95099	123.725	0.00808246	11.7394	0	0	yes
ENSBTAG00000018398	ENSBTAG00000018398	GPR4_BOVIN	18:53615948-53617690	q1	q2	OK	4.02486	0.0337411	-6.89829	119.287	0.00838316	6.06588	1.31234e-09	3.48331e-09	yes
ENSBTAG00000010316	ENSBTAG00000010316	ICAM5	7:16054554-16061272	q1	q2	OK	2.30917	0.0194113	-6.89433	118.96	0.0084062	6.1295	8.81575e-10	2.3658e-09	yes
ENSBTAG00000014830	ENSBTAG00000014830	C29H11orf66	29:40648858-40657395	q1	q2	OK	2.1895	0.0184276	-6.89258	118.816	0.00841641	4.36366	1.27904e-05	2.58927e-05	yes
ENSBTAG00000007651	ENSBTAG00000007651	SYTC2_BOVIN	21:29296000-29340066	q1	q2	OK	5.0167	0.0425146	-6.88264	117.999	0.00847459	8.61662	0	0	yes
ENSBTAG00000037735	ENSBTAG00000037735	Q08DZ7_BOVIN	18:54777174-54781917	q1	q2	OK	2.79001	0.0242761	-6.84459	114.928	0.00870108	6.10928	1.0008e-09	2.67648e-09	yes
ENSBTAG00000001639	ENSBTAG00000001639	TRPM1	21:27993517-28055083	q1	q2	OK	2.26041	0.0200244	-6.81868	112.883	0.00885876	7.73456	1.04361e-14	3.59844e-14	yes
ENSBTAG00000034294	ENSBTAG00000034294	-	8:22772985-22773572	q1	q2	OK	2.24184	0.0199318	-6.81347	112.476	0.00889081	1.25616	0.209059	0.260032	no
ENSBTAG00000047222	ENSBTAG00000047222	-	10:41943806-41944589	q1	q2	OK	10.1346	0.0913279	-6.79402	110.969	0.00901148	4.31652	1.58508e-05	3.18346e-05	yes
ENSBTAG00000008858	ENSBTAG00000008858	-	5:116071376-116109883	q1	q2	OK	2.17839	0.0199212	-6.77282	109.35	0.00914488	4.28642	1.81573e-05	3.63057e-05	yes
ENSBTAG00000018249	ENSBTAG00000018249	KCNN3	3:15781067-15948350	q1	q2	OK	1.69793	0.0156135	-6.76484	108.748	0.0091956	3.55222	0.000381993	0.000676787	yes
ENSBTAG00000033128	ENSBTAG00000033128	CRF_BOVIN	14:32213576-32215193	q1	q2	OK	4.8907	0.0450491	-6.7624	108.564	0.00921117	4.66358	3.10755e-06	6.59194e-06	yes
ENSBTAG00000017816	ENSBTAG00000017816	PLM_BOVIN	18:46053082-46057378	q1	q2	OK	6.90141	0.0656238	-6.71653	105.166	0.00950874	3.50497	0.000456662	0.000803742	yes
ENSBTAG00000019008	ENSBTAG00000019008	A5PKK2_BOVIN	25:569057-605515	q1	q2	OK	1.86824	0.0184223	-6.66408	101.412	0.0098608	5.31752	1.05193e-07	2.47258e-07	yes
ENSBTAG00000007882	ENSBTAG00000007882	CACNA1B	11:105182213-105394448	q1	q2	OK	0.48813	0.00486059	-6.64999	100.426	0.00995757	3.77455	0.0001603	0.000294197	yes
ENSBTAG00000006579	ENSBTAG00000006579	P4HA3_BOVIN	15:54418558-54459500	q1	q2	OK	3.75869	0.0384871	-6.60971	97.661	0.0102395	7.06888	1.56186e-12	4.8443e-12	yes
ENSBTAG00000000986	ENSBTAG00000000986	USH1C	15:35500364-35548981	q1	q2	OK	6.00595	0.061612	-6.60704	97.4802	0.0102585	8.39797	0	0	yes
ENSBTAG00000034385	ENSBTAG00000034385	Q0VD40_BOVIN	5:103987751-103993598	q1	q2	OK	1.34742	0.0138276	-6.6065	97.4442	0.0102623	3.4681	0.000524147	0.000916666	yes
ENSBTAG00000019636	ENSBTAG00000019636	SCAR5_BOVIN	8:10662267-10796378	q1	q2	OK	0.857154	0.00886458	-6.59536	96.6943	0.0103419	3.5524	0.000381731	0.000676397	yes
ENSBTAG00000006961	ENSBTAG00000006961	NLRP13	18:63607559-63639810	q1	q2	OK	1.74804	0.0183201	-6.57617	95.4165	0.0104803	4.5716	4.84014e-06	1.01013e-05	yes
ENSBTAG00000038464	ENSBTAG00000038464	PLIN5_BOVIN	7:20816180-20827916	q1	q2	OK	1.49375	0.0156809	-6.57379	95.2592	0.0104976	4.15833	3.2058e-05	6.266e-05	yes
ENSBTAG00000012708	ENSBTAG00000012708	E1BCA5_BOVIN	1:100456487-100539394	q1	q2	OK	7.04952	0.0748211	-6.55794	94.2183	0.0106136	8.1006	4.44089e-16	1.61874e-15	yes
ENSBTAG00000005527	ENSBTAG00000005527	E1B8G5_BOVIN	18:53668985-53677248	q1	q2	OK	2.25021	0.0242631	-6.53515	92.7421	0.0107826	3.23035	0.0012364	0.00208088	yes
ENSBTAG00000031052	ENSBTAG00000031052	CDK5R2	2:107620704-107621826	q1	q2	OK	3.19043	0.0345072	-6.53071	92.4569	0.0108158	3.51714	0.000436227	0.000769355	yes
ENSBTAG00000026273	ENSBTAG00000026273	MYL10	25:35734570-35743074	q1	q2	OK	8.63733	0.0943204	-6.51687	91.5744	0.0109201	4.4909	7.09219e-06	1.46416e-05	yes
ENSBTAG00000017864	ENSBTAG00000017864	PERI_BOVIN	5:30688659-30692263	q1	q2	OK	4.17535	0.0456654	-6.51465	91.4336	0.0109369	6.78816	1.13569e-11	3.37574e-11	yes
ENSBTAG00000040042	ENSBTAG00000040042	GRIN2C	19:57194106-57204958	q1	q2	OK	0.776032	0.00858833	-6.4976	90.3589	0.0110669	3.33101	0.000865318	0.00147945	yes
ENSBTAG00000013227	ENSBTAG00000013227	SNAI2_BOVIN	14:21577308-21580910	q1	q2	OK	7.79768	0.0874754	-6.47802	89.1414	0.0112182	9.89054	0	0	yes
ENSBTAG00000020904	ENSBTAG00000020904	E1BEL4_BOVIN	7:5236644-5249994	q1	q2	OK	1.75986	0.0197437	-6.47793	89.1353	0.0112189	6.02663	1.67415e-09	4.41268e-09	yes
ENSBTAG00000012020	ENSBTAG00000012020	A7YWC7_BOVIN	16:73894531-73939371	q1	q2	OK	1.45533	0.0163324	-6.47746	89.1069	0.0112225	4.25217	2.11708e-05	4.20521e-05	yes
ENSBTAG00000016072	ENSBTAG00000016072	SHC2	7:44723004-44753033	q1	q2	OK	1.55135	0.01772	-6.452	87.548	0.0114223	4.44534	8.77514e-06	1.79678e-05	yes
ENSBTAG00000015061	ENSBTAG00000015061	-	18:61040308-61046259	q1	q2	OK	0.53512	0.0061389	-6.44574	87.1687	0.011472	2.10358	0.0354154	0.050326	no
ENSBTAG00000018016	ENSBTAG00000018016	NUPR1	25:26340078-26341408	q1	q2	OK	6.29755	0.072936	-6.43202	86.3435	0.0115816	4.18528	2.84817e-05	5.59589e-05	yes
ENSBTAG00000010047	ENSBTAG00000010047	TIAM2	9:93127890-93307575	q1	q2	OK	1.2827	0.0149241	-6.42539	85.9482	0.011635	4.93507	8.01233e-07	1.77436e-06	yes
ENSBTAG00000019406	ENSBTAG00000019406	IGF2BP3	4:32077890-32222388	q1	q2	OK	1.04063	0.0121098	-6.42514	85.9329	0.011637	4.38528	1.15835e-05	2.35198e-05	yes
ENSBTAG00000015533	ENSBTAG00000015533	PTCHD2	16:43027922-43064263	q1	q2	OK	2.13777	0.0250906	-6.41282	85.202	0.0117368	7.64899	2.02061e-14	6.8682e-14	yes
ENSBTAG00000016520	ENSBTAG00000016520	A6QPI9_BOVIN	25:987389-989247	q1	q2	OK	1.57019	0.0186101	-6.39871	84.373	0.0118521	2.43684	0.0148164	0.0220443	yes
ENSBTAG00000009513	ENSBTAG00000009513	TGFBI	7:49059241-49095515	q1	q2	OK	17.3075	0.205256	-6.39783	84.3215	0.0118594	16.1523	0	0	yes
ENSBTAG00000000919	ENSBTAG00000000919	HEY2	9:25873434-25884617	q1	q2	OK	1.47836	0.0175469	-6.39663	84.2519	0.0118692	4.25908	2.05272e-05	4.08248e-05	yes
ENSBTAG00000020737	ENSBTAG00000020737	SOX8	25:787492-790981	q1	q2	OK	0.869803	0.0103342	-6.39519	84.1674	0.0118811	2.11872	0.0341144	0.0485626	yes
ENSBTAG00000031849	ENSBTAG00000031849	TMEM119	17:66586627-66593115	q1	q2	OK	4.44917	0.0529736	-6.39212	83.9884	0.0119064	5.88872	3.89202e-09	1.00151e-08	yes
ENSBTAG00000011530	ENSBTAG00000011530	A6QP71_BOVIN	18:14302695-14321678	q1	q2	OK	2.34955	0.0282284	-6.37909	83.2336	0.0120144	6.81249	9.59233e-12	2.85959e-11	yes
ENSBTAG00000005120	ENSBTAG00000005120	D5KB43_BOVIN	5:60265819-60300780	q1	q2	OK	2.03226	0.024442	-6.37757	83.1462	0.0120271	5.488	4.06504e-08	9.82325e-08	yes
ENSBTAG00000018975	ENSBTAG00000018975	KCNT1	11:103392738-103438416	q1	q2	OK	2.54429	0.0308249	-6.36702	82.5401	0.0121154	7.70443	1.31006e-14	4.49338e-14	yes
ENSBTAG00000018125	ENSBTAG00000018125	KIF5C	2:47315200-47472004	q1	q2	OK	7.91706	0.0965732	-6.3572	81.9799	0.0121981	14.8082	0	0	yes
ENSBTAG00000018833	ENSBTAG00000018833	SVOP_BOVIN	17:66276571-66349821	q1	q2	OK	2.37383	0.0289838	-6.35582	81.902	0.0122098	3.6792	0.000233967	0.000422626	yes
ENSBTAG00000008005	ENSBTAG00000008005	CC135_BOVIN	18:25761282-25782446	q1	q2	OK	0.830406	0.0101501	-6.35425	81.8126	0.0122231	4.13372	3.56937e-05	6.95158e-05	yes
ENSBTAG00000017982	ENSBTAG00000017982	FIBCD1	11:101169689-101200648	q1	q2	OK	2.00297	0.0245724	-6.34896	81.513	0.012268	4.37279	1.2267e-05	2.48703e-05	yes
ENSBTAG00000015715	ENSBTAG00000015715	SPOCD1	2:122436871-122468429	q1	q2	OK	0.966209	0.0118833	-6.34533	81.3081	0.0122989	4.13525	3.54571e-05	6.90633e-05	yes
ENSBTAG00000012621	ENSBTAG00000012621	RTN4RL2	15:82033374-82042917	q1	q2	OK	4.18436	0.0521088	-6.32734	80.3004	0.0124532	4.7962	1.61707e-06	3.50473e-06	yes
ENSBTAG00000015304	ENSBTAG00000015304	F1MU06_BOVIN	3:19818788-19828310	q1	q2	OK	4.6739	0.0591412	-6.30432	79.0295	0.0126535	6.60011	4.10865e-11	1.18615e-10	yes
ENSBTAG00000009800	ENSBTAG00000009800	A2PYH9_BOVIN	17:64913866-64937017	q1	q2	OK	2.72342	0.0345523	-6.30049	78.8202	0.0126871	3.57364	0.000352051	0.000625442	yes
ENSBTAG00000003345	ENSBTAG00000003345	FAT4	17:32712711-32889849	q1	q2	OK	0.571439	0.00731113	-6.28836	78.1601	0.0127943	8.1089	4.44089e-16	1.61874e-15	yes
ENSBTAG00000001303	ENSBTAG00000001303	HSPB8_BOVIN	17:58405436-58418688	q1	q2	OK	3.43013	0.0441636	-6.27926	77.6687	0.0128752	6.51266	7.38314e-11	2.10496e-10	yes
ENSBTAG00000008814	ENSBTAG00000008814	GPR124	27:32774354-32797592	q1	q2	OK	1.03205	0.0133266	-6.27506	77.4429	0.0129127	5.2989	1.16501e-07	2.73051e-07	yes
ENSBTAG00000017882	ENSBTAG00000017882	LRRC3_BOVIN	1:145885349-145887681	q1	q2	OK	6.67567	0.0878836	-6.24718	75.9604	0.0131647	8.48934	0	0	yes
ENSBTAG00000020636	ENSBTAG00000020636	SYN3	5:71475846-71926718	q1	q2	OK	1.01355	0.0134425	-6.23647	75.3989	0.0132628	3.07913	0.00207605	0.00341212	yes
ENSBTAG00000005390	ENSBTAG00000005390	GMFG_BOVIN	18:49309014-49313926	q1	q2	OK	10.4065	0.138221	-6.23436	75.2888	0.0132822	4.41319	1.01859e-05	2.07441e-05	yes
ENSBTAG00000001191	ENSBTAG00000001191	CCL17	18:25501848-25504738	q1	q2	OK	1794.74	23.8649	-6.23274	75.2042	0.0132971	54.0214	0	0	yes
ENSBTAG00000013736	ENSBTAG00000013736	PROM1	6:115981182-116105180	q1	q2	OK	2.97737	0.0397473	-6.22704	74.9075	0.0133498	7.51649	5.61773e-14	1.86623e-13	yes
ENSBTAG00000003919	ENSBTAG00000003919	KIAA0408	9:24120227-24131671	q1	q2	OK	0.964445	0.0129428	-6.21948	74.5159	0.0134199	3.07241	0.0021234	0.00348608	yes
ENSBTAG00000008788	ENSBTAG00000008788	Q3SYV8_BOVIN	19:20501230-20525353	q1	q2	OK	0.91837	0.0124019	-6.21045	74.0508	0.0135042	4.03733	5.40621e-05	0.000103688	yes
ENSBTAG00000005250	ENSBTAG00000005250	PGS1_BOVIN	X:39639905-39653687	q1	q2	OK	6.08095	0.0823083	-6.20711	73.8802	0.0135355	9.63041	0	0	yes
ENSBTAG00000005772	ENSBTAG00000005772	SPDYC	29:44049773-44051704	q1	q2	OK	3.47425	0.0473276	-6.19788	73.4085	0.0136224	3.3355	0.000851447	0.00145627	yes
ENSBTAG00000015296	ENSBTAG00000015296	PTPRB	5:43114781-43239445	q1	q2	OK	0.529658	0.00723409	-6.19411	73.2169	0.013658	5.23933	1.61156e-07	3.74528e-07	yes
ENSBTAG00000000161	ENSBTAG00000000161	TMEM40	22:57027957-57060239	q1	q2	OK	24.726	0.338517	-6.19066	73.0421	0.0136907	10.8231	0	0	yes
ENSBTAG00000005337	ENSBTAG00000005337	RAB3B_BOVIN	3:94917405-94985342	q1	q2	OK	4.13153	0.0567209	-6.18665	72.8396	0.0137288	3.92654	8.61778e-05	0.000162262	yes
ENSBTAG00000008336	ENSBTAG00000008336	HPCA_BOVIN	2:121604098-121616754	q1	q2	OK	5.18983	0.0713844	-6.18393	72.7026	0.0137547	5.18443	2.16674e-07	4.9913e-07	yes
ENSBTAG00000046742	ENSBTAG00000046742	CLEC2A	5:100479658-100484421	q1	q2	OK	13.0922	0.180292	-6.18223	72.6166	0.0137709	4.02741	5.63938e-05	0.000107969	yes
ENSBTAG00000010878	ENSBTAG00000010878	-	18:39992339-40315416	q1	q2	NOTEST	0.0636319	0.000878879	-6.17794	72.4012	0.0138119	2.01488	0.043917	1	no
ENSBTAG00000016096	ENSBTAG00000016096	SYP	X:92308615-92320415	q1	q2	OK	3.43822	0.0475498	-6.17608	72.3078	0.0138298	7.43905	1.01474e-13	3.33088e-13	yes
ENSBTAG00000009803	ENSBTAG00000009803	SNCB	7:39447681-39456598	q1	q2	OK	3.90716	0.0543533	-6.16761	71.8845	0.0139112	5.9974	2.00496e-09	5.24975e-09	yes
ENSBTAG00000003961	ENSBTAG00000003961	SNX20_BOVIN	18:19157446-19166134	q1	q2	OK	4.12991	0.0574691	-6.16718	71.8631	0.0139153	7.8266	5.10703e-15	1.78515e-14	yes
ENSBTAG00000007772	ENSBTAG00000007772	SLC29A4	25:39515687-39526238	q1	q2	OK	7.06862	0.0990336	-6.15737	71.376	0.0140103	8.94744	0	0	yes
ENSBTAG00000011939	ENSBTAG00000011939	LY6H	14:2563159-2565613	q1	q2	OK	3.02701	0.0424505	-6.15597	71.3068	0.0140239	3.31276	0.00092379	0.00157413	yes
ENSBTAG00000008471	ENSBTAG00000008471	F1MZT4_BOVIN	1:143119271-143155057	q1	q2	OK	2.52071	0.035381	-6.15471	71.2447	0.0140361	7.18339	6.80123e-13	2.14673e-12	yes
ENSBTAG00000021658	ENSBTAG00000021658	GRASP	5:28019960-28027764	q1	q2	OK	7.59161	0.107848	-6.13733	70.3918	0.0142063	10.5294	0	0	yes
ENSBTAG00000008111	ENSBTAG00000008111	ESYT3	1:131669530-131722942	q1	q2	OK	2.1642	0.0309183	-6.12923	69.9974	0.0142862	6.1387	8.3199e-10	2.23827e-09	yes
ENSBTAG00000046668	ENSBTAG00000046668	ANG2_BOVIN	10:26423873-26445634	q1	q2	OK	3.34874	0.0478693	-6.12837	69.9559	0.0142948	2.81655	0.00485425	0.00766689	yes
ENSBTAG00000018416	ENSBTAG00000018416	CCD42_BOVIN	19:28873594-28886401	q1	q2	OK	4.29548	0.0615723	-6.12439	69.7632	0.0143342	6.05789	1.37919e-09	3.65181e-09	yes
ENSBTAG00000016948	ENSBTAG00000016948	F1N6Y3_BOVIN	22:53161301-53224114	q1	q2	OK	1.06944	0.0153457	-6.12287	69.6899	0.0143494	4.213	2.51996e-05	4.97872e-05	yes
ENSBTAG00000015241	ENSBTAG00000015241	EPHX2	8:75908164-75977482	q1	q2	OK	9.29559	0.134807	-6.10758	68.9548	0.0145022	12.0009	0	0	yes
ENSBTAG00000006280	ENSBTAG00000006280	RFOX3_BOVIN	19:53623086-53953037	q1	q2	OK	5.30282	0.0775549	-6.0954	68.375	0.0146252	8.72302	0	0	yes
ENSBTAG00000002136	ENSBTAG00000002136	FCHO1	7:5295361-5319564	q1	q2	OK	5.31074	0.0778129	-6.09276	68.2501	0.014652	10.825	0	0	yes
ENSBTAG00000020676	ENSBTAG00000020676	Q9TVA6_BOVIN	13:75466512-75473824	q1	q2	OK	8.61996	0.126345	-6.09224	68.2256	0.0146573	12.3903	0	0	yes
ENSBTAG00000047786	ENSBTAG00000047786	LRRC10B	29:40674001-40676155	q1	q2	OK	2.12607	0.0314913	-6.07709	67.5129	0.014812	4.46072	8.16854e-06	1.67637e-05	yes
ENSBTAG00000021639	ENSBTAG00000021639	ARC	14:2892787-2893978	q1	q2	OK	30.9472	0.461024	-6.06882	67.1271	0.0148971	16.4144	0	0	yes
ENSBTAG00000021901	ENSBTAG00000021901	TRPM2	1:145830609-145871792	q1	q2	OK	0.941394	0.0140407	-6.06712	67.0475	0.0149147	5.41033	6.29086e-08	1.50124e-07	yes
ENSBTAG00000019977	ENSBTAG00000019977	PCDH10	17:25474595-25495147	q1	q2	OK	1.6624	0.0249509	-6.05804	66.6269	0.0150089	6.40234	1.5301e-10	4.29536e-10	yes
ENSBTAG00000007325	ENSBTAG00000007325	A6QQ05_BOVIN	25:994571-996276	q1	q2	OK	2.76079	0.0414863	-6.0563	66.547	0.015027	3.11574	0.00183486	0.00303657	yes
ENSBTAG00000011275	ENSBTAG00000011275	SCUBE1	5:114644628-114767260	q1	q2	OK	2.25183	0.033877	-6.05465	66.4708	0.0150442	5.62881	1.81462e-08	4.48022e-08	yes
ENSBTAG00000008295	ENSBTAG00000008295	ACL6B_BOVIN	25:36459673-36469782	q1	q2	OK	1.46016	0.0221215	-6.04454	66.0064	0.01515	2.98493	0.00283641	0.00459452	yes
ENSBTAG00000005092	ENSBTAG00000005092	A5PKA4_BOVIN	8:87340387-87578642	q1	q2	OK	0.666327	0.0101554	-6.03591	65.6131	0.0152409	3.75127	0.000175943	0.00032142	yes
ENSBTAG00000047482	ENSBTAG00000047482	PRRT4	4:93350247-93358141	q1	q2	OK	3.23087	0.0495658	-6.02643	65.1835	0.0153414	7.25875	3.90576e-13	1.2466e-12	yes
ENSBTAG00000012688	ENSBTAG00000012688	CAPSL	20:38272476-38300277	q1	q2	OK	7.59631	0.116857	-6.02249	65.0052	0.0153833	6.19466	5.84126e-10	1.58139e-09	yes
ENSBTAG00000006440	ENSBTAG00000006440	IGDCC4	10:12264593-12291146	q1	q2	OK	1.85313	0.0285211	-6.02179	64.974	0.0153908	7.19524	6.23501e-13	1.97222e-12	yes
ENSBTAG00000033565	ENSBTAG00000033565	BASP1	20:55967803-55968473	q1	q2	OK	3.61107	0.0562921	-6.00335	64.1488	0.0155888	3.78939	0.000151015	0.000277752	yes
ENSBTAG00000018003	ENSBTAG00000018003	Q5EAB1_BOVIN	5:56205532-56212752	q1	q2	OK	1.18013	0.0187746	-5.97403	62.8578	0.0159088	3.88906	0.000100633	0.00018813	yes
ENSBTAG00000003313	ENSBTAG00000003313	TNFRSF9	16:46288365-46306428	q1	q2	OK	6.51744	0.104616	-5.96113	62.2987	0.0160517	7.91394	2.44249e-15	8.65485e-15	yes
ENSBTAG00000011279	ENSBTAG00000011279	MATN4	13:74358169-74381016	q1	q2	OK	3.46283	0.0557037	-5.95803	62.1652	0.0160862	6.36087	2.0062e-10	5.57991e-10	yes
ENSBTAG00000039861	ENSBTAG00000039861	OAS1	17:63611773-63646117	q1	q2	OK	1.69342	0.0272589	-5.95706	62.1236	0.016097	4.0504	5.11296e-05	9.83929e-05	yes
ENSBTAG00000013662	ENSBTAG00000013662	A7E303_BOVIN	1:43541935-43717619	q1	q2	OK	0.489167	0.00787553	-5.95681	62.1123	0.0160998	3.87781	0.000105402	0.000196548	yes
ENSBTAG00000020522	ENSBTAG00000020522	-	X:56005900-56020926	q1	q2	OK	1.2497	0.020621	-5.92132	60.6033	0.0165008	3.18467	0.00144918	0.00241971	yes
ENSBTAG00000015745	ENSBTAG00000015745	R3GEF_BOVIN	29:41112114-41130629	q1	q2	OK	1.77294	0.0292619	-5.92098	60.5887	0.0165047	4.80861	1.51982e-06	3.29967e-06	yes
ENSBTAG00000001008	ENSBTAG00000001008	Q69GU5_BOVIN	28:26939279-26941721	q1	q2	OK	1.11836	0.0184662	-5.92036	60.5625	0.0165118	3.84417	0.000120962	0.000224328	yes
ENSBTAG00000020243	ENSBTAG00000020243	SVEP1	8:101588108-101799168	q1	q2	NOTEST	0.255525	0.00423277	-5.91572	60.3683	0.016565	4.4502	8.57909e-06	1	no
ENSBTAG00000012630	ENSBTAG00000012630	F1MUJ4_BOVIN	15:66754733-66832246	q1	q2	OK	23.0742	0.383698	-5.91017	60.1364	0.0166288	23.1308	0	0	yes
ENSBTAG00000012280	ENSBTAG00000012280	PGLYRP2	7:8702089-8707156	q1	q2	OK	1.15185	0.019189	-5.90753	60.0266	0.0166593	3.0247	0.00248883	0.00405654	yes
ENSBTAG00000045805	ENSBTAG00000045805	LOC100196902	19:37314776-37325265	q1	q2	OK	0.560343	0.0093414	-5.90653	59.9849	0.0166708	1.49732	0.13431	0.174657	no
ENSBTAG00000001021	ENSBTAG00000001021	F1MM10_BOVIN	21:34342807-34345682	q1	q2	OK	10.0095	0.167871	-5.89787	59.6261	0.0167712	12.1315	0	0	yes
ENSBTAG00000018810	ENSBTAG00000018810	Q28195_BOVIN	9:104735656-104760261	q1	q2	OK	39.0432	0.657956	-5.89093	59.3401	0.0168521	34.125	0	0	yes
ENSBTAG00000011702	ENSBTAG00000011702	ENTPD3	22:13271525-13302316	q1	q2	OK	2.0507	0.0345859	-5.88979	59.2929	0.0168654	4.27314	1.92736e-05	3.84621e-05	yes
ENSBTAG00000003308	ENSBTAG00000003308	GRID2IP	25:38903899-38934907	q1	q2	OK	1.36759	0.0231393	-5.88514	59.1025	0.0169198	6.44321	1.16972e-10	3.30364e-10	yes
ENSBTAG00000001764	ENSBTAG00000001764	A8KC79_BOVIN	7:3947068-3978183	q1	q2	NOTEST	0.251903	0.00427073	-5.88224	58.9836	0.0169539	3.7106	0.000206766	1	no
ENSBTAG00000002469	ENSBTAG00000002469	KANK3	7:18200290-18210847	q1	q2	OK	11.3633	0.192798	-5.88115	58.9389	0.0169667	17.0325	0	0	yes
ENSBTAG00000014707	ENSBTAG00000014707	ISG15_BOVIN	16:52714626-52715665	q1	q2	OK	82.8607	1.41021	-5.87671	58.7577	0.017019	17.5623	0	0	yes
ENSBTAG00000002858	ENSBTAG00000002858	ACBD7_BOVIN	13:29940128-29943624	q1	q2	OK	9.5958	0.165041	-5.86151	58.1419	0.0171993	10.7908	0	0	yes
ENSBTAG00000044146	ENSBTAG00000044146	NPC1L1	4:77572131-77593152	q1	q2	OK	3.75498	0.064597	-5.86119	58.1293	0.0172031	11.4023	0	0	yes
ENSBTAG00000048249	ENSBTAG00000048249	DEFB1_BOVIN	27:5788619-5790534	q1	q2	OK	7.20121	0.123922	-5.86073	58.1108	0.0172086	3.68175	0.000231641	0.000418612	yes
ENSBTAG00000009132	ENSBTAG00000009132	A2VDV7_BOVIN	1:143211538-143246217	q1	q2	OK	0.699222	0.0120964	-5.8531	57.8041	0.0172998	3.69155	0.00022289	0.000403469	yes
ENSBTAG00000046467	ENSBTAG00000046467	TP4A3_BOVIN	14:3578345-3586015	q1	q2	OK	14.522	0.25223	-5.84736	57.5744	0.0173688	13.4526	0	0	yes
ENSBTAG00000007191	ENSBTAG00000007191	CCL5_BOVIN	19:14823469-14831157	q1	q2	OK	5.91673	0.102824	-5.84656	57.5423	0.0173784	3.81213	0.000137775	0.000254119	yes
ENSBTAG00000004023	ENSBTAG00000004023	K132L_BOVIN	4:33518952-33763007	q1	q2	OK	0.466336	0.00814718	-5.83892	57.2389	0.0174707	3.79047	0.000150364	0.000276649	yes
ENSBTAG00000003950	ENSBTAG00000003950	F1MHI3_BOVIN	2:5034438-5044966	q1	q2	OK	1.40976	0.0247217	-5.83353	57.0252	0.0175361	3.30446	0.000951579	0.00161928	yes
ENSBTAG00000015557	ENSBTAG00000015557	-	7:15835491-15865454	q1	q2	OK	0.854884	0.0150188	-5.83089	56.9209	0.0175682	5.93019	3.02585e-09	7.83332e-09	yes
ENSBTAG00000005888	ENSBTAG00000005888	MDGA1	23:11530877-11594184	q1	q2	OK	1.39439	0.0245165	-5.82973	56.8756	0.0175823	5.79169	6.9683e-09	1.76601e-08	yes
ENSBTAG00000032821	ENSBTAG00000032821	A6QLJ6_BOVIN	12:53032462-53156622	q1	q2	OK	9.38661	0.167243	-5.81059	56.1256	0.0178171	16.5256	0	0	yes
ENSBTAG00000015743	ENSBTAG00000015743	Q08DA2_BOVIN	23:40616329-40677006	q1	q2	OK	9.97021	0.178215	-5.80593	55.9448	0.0178748	10.4583	0	0	yes
ENSBTAG00000007975	ENSBTAG00000007975	ALDH8A1	9:73977644-74002359	q1	q2	OK	2.25773	0.0403941	-5.80459	55.8926	0.0178914	5.92399	3.14225e-09	8.12689e-09	yes
ENSBTAG00000046122	ENSBTAG00000046122	NRARP	11:105790353-105790698	q1	q2	OK	22.9334	0.412163	-5.79809	55.6416	0.0179722	4.71349	2.43515e-06	5.20634e-06	yes
ENSBTAG00000001094	ENSBTAG00000001094	Q2HJ29_BOVIN	12:31029404-31296069	q1	q2	OK	1.46658	0.0265232	-5.78906	55.2942	0.018085	3.76593	0.00016593	0.00030405	yes
ENSBTAG00000012931	ENSBTAG00000012931	PLN	9:32779813-32900894	q1	q2	OK	2.18803	0.0401439	-5.76831	54.5047	0.018347	6.65798	2.77613e-11	8.08488e-11	yes
ENSBTAG00000006434	ENSBTAG00000006434	A4IFK4_BOVIN	6:7388727-7590933	q1	q2	OK	0.711527	0.0130951	-5.76382	54.3354	0.0184042	4.19008	2.78853e-05	5.48484e-05	yes
ENSBTAG00000002340	ENSBTAG00000002340	STEAP4	4:72833496-72862043	q1	q2	OK	5.63016	0.103922	-5.7596	54.1768	0.0184581	8.08998	6.66134e-16	2.41512e-15	yes
ENSBTAG00000047986	ENSBTAG00000047986	-	17:72826679-73152862	q1	q2	OK	0.428775	0.00794552	-5.75393	53.9644	0.0185308	0.384785	0.700397	0.753675	no
ENSBTAG00000009705	ENSBTAG00000009705	PEDF_BOVIN	19:23422879-23430667	q1	q2	OK	3.85675	0.0716625	-5.75002	53.8182	0.0185811	5.81773	5.96516e-09	1.51817e-08	yes
ENSBTAG00000019327	ENSBTAG00000019327	NRAP	26:34304684-34414796	q1	q2	OK	1.60543	0.030046	-5.73965	53.4324	0.0187151	8.19315	2.22045e-16	8.1706e-16	yes
ENSBTAG00000047078	ENSBTAG00000047078	NTF4	18:56032584-56033542	q1	q2	OK	5.8993	0.11047	-5.73882	53.4018	0.0187259	4.05657	4.97979e-05	9.59054e-05	yes
ENSBTAG00000030482	ENSBTAG00000030482	A6QQ95_BOVIN	18:57404801-57413315	q1	q2	OK	1.22562	0.023103	-5.72929	53.0503	0.01885	3.93436	8.34203e-05	0.000157355	yes
ENSBTAG00000001599	ENSBTAG00000001599	SV2A_BOVIN	3:20746036-20755994	q1	q2	OK	8.37665	0.158205	-5.7265	52.9481	0.0188865	17.0764	0	0	yes
ENSBTAG00000006024	ENSBTAG00000006024	ISLR_BOVIN	21:34903757-34906887	q1	q2	OK	2.42043	0.0457145	-5.72647	52.9467	0.0188869	6.57942	4.72287e-11	1.35817e-10	yes
ENSBTAG00000006377	ENSBTAG00000006377	MYO1G	4:77317208-77333095	q1	q2	OK	0.892825	0.0169522	-5.71883	52.6672	0.0189872	3.9314	8.44526e-05	0.000159234	yes
ENSBTAG00000046574	ENSBTAG00000046574	FRMPD1	8:62271950-62322309	q1	q2	OK	0.841192	0.0161364	-5.70404	52.1301	0.0191828	5.92528	3.11775e-09	8.06608e-09	yes
ENSBTAG00000037527	ENSBTAG00000037527	OAS1	17:63654697-63678163	q1	q2	OK	0.816664	0.0157271	-5.69841	51.9272	0.0192578	1.96656	0.049234	0.0685208	no
ENSBTAG00000010660	ENSBTAG00000010660	CACNA1C	5:109152547-109430265	q1	q2	NOTEST	0.262376	0.00507652	-5.69166	51.6842	0.0193482	1.91327	0.0557131	1	no
ENSBTAG00000003069	ENSBTAG00000003069	MAN1C1	2:127888645-128008111	q1	q2	OK	2.30196	0.0448436	-5.68182	51.3331	0.0194806	5.8195	5.9023e-09	1.50311e-08	yes
ENSBTAG00000021339	ENSBTAG00000021339	SCN8A	5:28211639-28331404	q1	q2	OK	0.432432	0.0084443	-5.67835	51.2099	0.0195275	5.07584	3.8578e-07	8.73468e-07	yes
ENSBTAG00000013657	ENSBTAG00000013657	ACHA5_BOVIN	21:31468074-31495957	q1	q2	OK	2.08932	0.0413816	-5.6579	50.4891	0.0198063	5.19113	2.09025e-07	4.81919e-07	yes
ENSBTAG00000015351	ENSBTAG00000015351	STYK1	5:99407005-99439453	q1	q2	OK	0.977378	0.0194366	-5.65207	50.2854	0.0198865	3.66467	0.000247661	0.000446223	yes
ENSBTAG00000003921	ENSBTAG00000003921	C6orf174	9:24056187-24101666	q1	q2	OK	0.731268	0.0145737	-5.64897	50.1772	0.0199292	3.67326	0.000239472	0.000432042	yes
ENSBTAG00000011307	ENSBTAG00000011307	DYN1_BOVIN	11:98834513-98877986	q1	q2	OK	10.2511	0.205873	-5.63789	49.7933	0.0200829	17.5218	0	0	yes
ENSBTAG00000008419	ENSBTAG00000008419	PDE2A	15:52913332-52984107	q1	q2	OK	7.32788	0.149939	-5.61095	48.8724	0.0204614	17.082	0	0	yes
ENSBTAG00000005556	ENSBTAG00000005556	CYGB	19:55846582-55855228	q1	q2	OK	5.01784	0.103118	-5.6047	48.6611	0.0205503	4.86289	1.15682e-06	2.53081e-06	yes
ENSBTAG00000019779	ENSBTAG00000019779	RB39B_BOVIN	X:38586278-38590528	q1	q2	OK	1.13939	0.0234335	-5.60355	48.6223	0.0205666	3.64291	0.000269569	0.000484195	yes
ENSBTAG00000045492	ENSBTAG00000045492	Q2NKV1_BOVIN	10:26423873-26445634	q1	q2	OK	4.23508	0.0881861	-5.58569	48.0243	0.0208228	3.53252	0.00041162	0.000727377	yes
ENSBTAG00000003369	ENSBTAG00000003369	SYT12	29:45655688-45676864	q1	q2	OK	1.68538	0.0352221	-5.58045	47.8501	0.0208986	4.32801	1.50461e-05	3.02821e-05	yes
ENSBTAG00000013429	ENSBTAG00000013429	CLEC4G	7:17785971-17789026	q1	q2	OK	4.90351	0.103207	-5.57021	47.5114	0.0210475	5.68492	1.30876e-08	3.26247e-08	yes
ENSBTAG00000003594	ENSBTAG00000003594	RIBC2_BOVIN	5:116546018-116556849	q1	q2	OK	1.85802	0.0394489	-5.55764	47.0994	0.0212316	4.4801	7.46076e-06	1.53771e-05	yes
ENSBTAG00000015375	ENSBTAG00000015375	A5D7L2_BOVIN	11:98435179-98467957	q1	q2	OK	1.8826	0.0406771	-5.53237	46.2816	0.0216068	7.02568	2.1303e-12	6.56357e-12	yes
ENSBTAG00000020257	ENSBTAG00000020257	A6QQD4_BOVIN	29:26244553-26303070	q1	q2	OK	3.39955	0.0735795	-5.5299	46.2024	0.0216438	10.083	0	0	yes
ENSBTAG00000005353	ENSBTAG00000005353	DESM_BOVIN	2:108075459-108082534	q1	q2	OK	14.2387	0.309631	-5.52312	45.986	0.0217458	17.1396	0	0	yes
ENSBTAG00000016061	ENSBTAG00000016061	RSAD2_BOVIN	11:90012629-90029927	q1	q2	OK	1.63195	0.0356347	-5.51717	45.7967	0.0218357	5.53855	3.0498e-08	7.42949e-08	yes
ENSBTAG00000001279	ENSBTAG00000001279	MPP2	19:44387967-44412456	q1	q2	OK	6.49534	0.143035	-5.50496	45.4108	0.0220212	10.7136	0	0	yes
ENSBTAG00000007393	ENSBTAG00000007393	F1MUP6_BOVIN	19:43696265-43700032	q1	q2	OK	17.8983	0.395794	-5.49893	45.2213	0.0221135	14.2829	0	0	yes
ENSBTAG00000046303	ENSBTAG00000046303	-	11:98509473-98513781	q1	q2	OK	9.07188	0.200629	-5.4988	45.2172	0.0221155	8.28139	2.22045e-16	8.1706e-16	yes
ENSBTAG00000047613	ENSBTAG00000047613	HTRA3	6:119387683-119418513	q1	q2	OK	2.67082	0.0590874	-5.49829	45.2012	0.0221233	6.26562	3.71348e-10	1.01873e-09	yes
ENSBTAG00000019988	ENSBTAG00000019988	Q4JM29_BOVIN	7:21907305-21926375	q1	q2	OK	1.52951	0.033906	-5.49539	45.1103	0.0221678	5.1652	2.40181e-07	5.51173e-07	yes
ENSBTAG00000004878	ENSBTAG00000004878	Q08DK8_BOVIN	22:50957514-50969031	q1	q2	OK	0.950498	0.0211212	-5.49192	45.0021	0.0222212	4.32527	1.52348e-05	3.06365e-05	yes
ENSBTAG00000043991	ENSBTAG00000043991	SLIT1	26:18136426-18196310	q1	q2	OK	0.343943	0.00767929	-5.48505	44.7884	0.0223273	2.87103	0.00409134	0.00651252	yes
ENSBTAG00000006563	ENSBTAG00000006563	A6H7I0_BOVIN	22:15444465-15451791	q1	q2	OK	0.799378	0.0178711	-5.48317	44.7302	0.0223564	3.56268	0.000367095	0.000651314	yes
ENSBTAG00000002240	ENSBTAG00000002240	GPR18_BOVIN	12:80056875-80227030	q1	q2	OK	0.564841	0.0126743	-5.47787	44.5659	0.0224387	1.957	0.0503479	0.0699633	no
ENSBTAG00000047625	ENSBTAG00000047625	-	7:64773692-64778702	q1	q2	OK	2.05522	0.0461253	-5.47759	44.5573	0.022443	8.23374	2.22045e-16	8.1706e-16	yes
ENSBTAG00000017146	ENSBTAG00000017146	GRIK4	15:32032517-32103782	q1	q2	OK	0.727237	0.0164016	-5.47052	44.3394	0.0225533	3.0946	0.00197081	0.00324999	yes
ENSBTAG00000015235	ENSBTAG00000015235	HMCN1	16:68192900-68733392	q1	q2	OK	0.364647	0.00824342	-5.46712	44.2349	0.0226065	7.36868	1.72307e-13	5.5961e-13	yes
ENSBTAG00000032844	ENSBTAG00000032844	Q0VCB9_BOVIN	4:55641991-55646119	q1	q2	OK	0.879797	0.0200172	-5.45786	43.9521	0.022752	2.7827	0.00539089	0.00846925	yes
ENSBTAG00000013921	ENSBTAG00000013921	KCRM_BOVIN	18:53383533-53392948	q1	q2	OK	0.983434	0.0226699	-5.43898	43.3806	0.0230517	2.84658	0.00441914	0.00700961	yes
ENSBTAG00000021048	ENSBTAG00000021048	ADML_BOVIN	15:42911043-42913326	q1	q2	OK	21.1483	0.488027	-5.43744	43.3343	0.0230764	13.2507	0	0	yes
ENSBTAG00000007879	ENSBTAG00000007879	SRRM3	25:34796841-34849834	q1	q2	OK	0.974979	0.0225552	-5.43384	43.2264	0.023134	3.98287	6.80886e-05	0.000129567	yes
ENSBTAG00000021133	ENSBTAG00000021133	-	27:12619928-12807702	q1	q2	OK	0.355755	0.00826087	-5.42845	43.0651	0.0232206	3.97652	6.99315e-05	0.000132903	yes
ENSBTAG00000017223	ENSBTAG00000017223	MEST	4:95066961-95079685	q1	q2	OK	7.89013	0.184026	-5.42206	42.8751	0.0233237	12.9704	0	0	yes
ENSBTAG00000020229	ENSBTAG00000020229	ATP8B3	7:45738427-45760463	q1	q2	OK	7.72295	0.180668	-5.41774	42.7466	0.0233936	18.6936	0	0	yes
ENSBTAG00000026527	ENSBTAG00000026527	AHRR	20:71797890-71882980	q1	q2	OK	2.19119	0.0514092	-5.41354	42.6225	0.0234618	6.60866	3.87803e-11	1.12196e-10	yes
ENSBTAG00000005670	ENSBTAG00000005670	ARHGEF19	2:136480736-136491543	q1	q2	OK	2.76295	0.0649605	-5.4105	42.5328	0.0235113	8.37572	0	0	yes
ENSBTAG00000011713	ENSBTAG00000011713	MYO15B	19:56580038-56586212	q1	q2	OK	1.58078	0.0371768	-5.41009	42.5206	0.023518	5.82096	5.8512e-09	1.49103e-08	yes
ENSBTAG00000015865	ENSBTAG00000015865	CAPN14	11:68678748-68715047	q1	q2	OK	4.93509	0.116109	-5.40953	42.5039	0.0235271	9.80865	0	0	yes
ENSBTAG00000010399	ENSBTAG00000010399	TXNDC16	10:11563977-11652151	q1	q2	OK	12.9917	0.305949	-5.40816	42.4636	0.0235495	17.732	0	0	yes
ENSBTAG00000021774	ENSBTAG00000021774	CELF5	7:21813143-21839351	q1	q2	OK	2.3054	0.0545027	-5.40254	42.2988	0.0236414	5.1195	3.06345e-07	6.97986e-07	yes
ENSBTAG00000015961	ENSBTAG00000015961	Q58CZ7_BOVIN	3:28364795-28587650	q1	q2	OK	9.83691	0.233743	-5.39521	42.0843	0.0237618	9.47004	0	0	yes
ENSBTAG00000013843	ENSBTAG00000013843	F1MIW7_BOVIN	5:28097836-28106733	q1	q2	OK	1.60258	0.0382013	-5.39063	41.9509	0.0238374	5.52823	3.23469e-08	7.87046e-08	yes
ENSBTAG00000019801	ENSBTAG00000019801	FAM151A	3:92245962-92260622	q1	q2	OK	0.752558	0.0181103	-5.37692	41.5541	0.024065	2.74816	0.00599309	0.00936755	yes
ENSBTAG00000018603	ENSBTAG00000018603	RGMA	21:14349792-14376704	q1	q2	OK	1.48194	0.035776	-5.37236	41.4227	0.0241412	4.03061	5.56324e-05	0.000106562	yes
ENSBTAG00000003777	ENSBTAG00000003777	F1MX81_BOVIN	3:103278177-103297710	q1	q2	OK	0.930608	0.0224671	-5.37229	41.4209	0.0241424	4.93003	8.22152e-07	1.81871e-06	yes
ENSBTAG00000018085	ENSBTAG00000018085	GTSF1_BOVIN	5:25730496-25744924	q1	q2	OK	4.71135	0.114112	-5.36761	41.2871	0.0242208	4.5967	4.29236e-06	8.99962e-06	yes
ENSBTAG00000005745	ENSBTAG00000005745	HPSE	6:99846840-99892778	q1	q2	OK	3.07337	0.074859	-5.3595	41.0555	0.0243573	6.94965	3.66174e-12	1.1149e-11	yes
ENSBTAG00000011390	ENSBTAG00000011390	ACHD_BOVIN	2:120975091-120982350	q1	q2	OK	1.3249	0.0323982	-5.35383	40.8942	0.0244532	3.88575	0.000102014	0.000190624	yes
ENSBTAG00000035836	ENSBTAG00000035836	GLT25D2	16:66452390-66571427	q1	q2	OK	1.54688	0.0379325	-5.34978	40.7798	0.024522	4.67872	2.88674e-06	6.13715e-06	yes
ENSBTAG00000017228	ENSBTAG00000017228	TP53I11	15:75870184-75884870	q1	q2	OK	4.35936	0.107351	-5.3437	40.6085	0.0246256	4.44747	8.6888e-06	1.78067e-05	yes
ENSBTAG00000001687	ENSBTAG00000001687	STC1_BOVIN	8:71854904-71868618	q1	q2	OK	4.26584	0.105432	-5.33845	40.4606	0.0247153	9.99988	0	0	yes
ENSBTAG00000002145	ENSBTAG00000002145	MMP17	17:46236042-46260184	q1	q2	OK	2.68913	0.0665095	-5.33744	40.4323	0.0247326	6.98817	2.78511e-12	8.53742e-12	yes
ENSBTAG00000002624	ENSBTAG00000002624	A6QR13_BOVIN	24:46196112-46290465	q1	q2	OK	2.13936	0.053101	-5.3323	40.2885	0.0248209	7.28995	3.09974e-13	9.94804e-13	yes
ENSBTAG00000046266	ENSBTAG00000046266	E1BMQ4_BOVIN	7:19187446-19190363	q1	q2	OK	193.999	4.81573	-5.33215	40.2844	0.0248235	41.1849	0	0	yes
ENSBTAG00000004063	ENSBTAG00000004063	IPSP_BOVIN	21:59782813-59795808	q1	q2	OK	2.37064	0.0588701	-5.3316	40.269	0.024833	6.40336	1.51993e-10	4.26755e-10	yes
ENSBTAG00000008688	ENSBTAG00000008688	HEYL_BOVIN	3:107032467-107047976	q1	q2	OK	0.94341	0.0234961	-5.32739	40.1518	0.0249055	5.30598	1.12067e-07	2.63037e-07	yes
ENSBTAG00000015789	ENSBTAG00000015789	BCAN	3:14223568-14241533	q1	q2	OK	0.512205	0.0127671	-5.32622	40.1191	0.0249257	3.45846	0.000543267	0.000949185	yes
ENSBTAG00000020824	ENSBTAG00000020824	A6QNZ7_BOVIN	19:41663604-41667960	q1	q2	OK	1.4661	0.0367651	-5.31751	39.8775	0.0250767	4.70817	2.49949e-06	5.33618e-06	yes
ENSBTAG00000010215	ENSBTAG00000010215	CR3L3_BOVIN	7:21088134-21099619	q1	q2	OK	5.72243	0.143567	-5.31683	39.859	0.0250885	10.1684	0	0	yes
ENSBTAG00000018169	ENSBTAG00000018169	ITGB4	19:56472337-56506801	q1	q2	OK	11.9793	0.302271	-5.30855	39.631	0.0252329	27.3648	0	0	yes
ENSBTAG00000012311	ENSBTAG00000012311	CACNG5	19:63621225-63627088	q1	q2	OK	2.44631	0.0617767	-5.3074	39.5992	0.025253	3.4455	0.000570011	0.000993884	yes
ENSBTAG00000003944	ENSBTAG00000003944	C2orf62	2:107100144-107105993	q1	q2	OK	1.10275	0.0279748	-5.30084	39.4194	0.0253681	3.42873	0.000606423	0.00105443	yes
ENSBTAG00000020828	ENSBTAG00000020828	SH2D6	11:49390249-49396081	q1	q2	OK	3.65489	0.094108	-5.27937	38.8372	0.0257485	4.10467	4.04898e-05	7.85367e-05	yes
ENSBTAG00000045808	ENSBTAG00000045808	IL17REL	5:120992688-120995979	q1	q2	OK	2.54233	0.0655096	-5.2783	38.8085	0.0257676	3.60595	0.000311019	0.000555213	yes
ENSBTAG00000023147	ENSBTAG00000023147	LINGO1	21:33292503-33294348	q1	q2	OK	1.79995	0.0466396	-5.27025	38.5927	0.0259117	5.54241	2.98335e-08	7.27524e-08	yes
ENSBTAG00000038876	ENSBTAG00000038876	-	X:124199123-124201485	q1	q2	OK	0.591099	0.0153381	-5.26821	38.538	0.0259484	1.7133	0.086657	0.116372	no
ENSBTAG00000013070	ENSBTAG00000013070	Q2KIM2_BOVIN	1:66900638-66956302	q1	q2	OK	1.89006	0.0491074	-5.26635	38.4883	0.0259819	3.14387	0.00166732	0.00276916	yes
ENSBTAG00000046924	ENSBTAG00000046924	SEMA3G	22:48999618-49008847	q1	q2	OK	0.993565	0.0258757	-5.26294	38.3976	0.0260434	4.07583	4.58505e-05	8.85337e-05	yes
ENSBTAG00000011896	ENSBTAG00000011896	-	22:58380247-58424725	q1	q2	OK	2.18924	0.0572639	-5.25666	38.2307	0.026157	8.37684	0	0	yes
ENSBTAG00000019272	ENSBTAG00000019272	LPCAT2	18:23861828-23927174	q1	q2	OK	3.21277	0.0842086	-5.25371	38.1525	0.0262105	7.77814	7.32747e-15	2.54762e-14	yes
ENSBTAG00000046177	ENSBTAG00000046177	IGFN1	16:81604664-81641464	q1	q2	OK	0.28759	0.00754168	-5.25298	38.1334	0.0262238	5.08111	3.75238e-07	8.5031e-07	yes
ENSBTAG00000020173	ENSBTAG00000020173	INPP5D	3:113403949-113541895	q1	q2	OK	0.451504	0.011858	-5.2508	38.0759	0.0262634	4.08532	4.40153e-05	8.51374e-05	yes
ENSBTAG00000007281	ENSBTAG00000007281	SEMA6C	3:19717719-19728131	q1	q2	OK	9.16997	0.241473	-5.24699	37.9751	0.0263329	16.7573	0	0	yes
ENSBTAG00000039618	ENSBTAG00000039618	Q0II39_BOVIN	10:4872817-4904741	q1	q2	OK	4.98275	0.131322	-5.24576	37.943	0.0263554	6.65428	2.84692e-11	8.28362e-11	yes
ENSBTAG00000012543	ENSBTAG00000012543	EDA_BOVIN	X:85708002-86099973	q1	q2	OK	1.45542	0.0384875	-5.2409	37.8154	0.0264443	3.31131	0.000928599	0.00158166	yes
ENSBTAG00000007146	ENSBTAG00000007146	CPVL	4:67482870-67604560	q1	q2	OK	2.95651	0.0781842	-5.24087	37.8147	0.0264448	4.58751	4.48567e-06	9.3892e-06	yes
ENSBTAG00000012078	ENSBTAG00000012078	T176A_BOVIN	4:114208681-114212312	q1	q2	OK	3.42941	0.0907292	-5.24025	37.7983	0.0264562	4.07079	4.68533e-05	9.03841e-05	yes
ENSBTAG00000046264	ENSBTAG00000046264	-	19:43514250-43544945	q1	q2	OK	0.830852	0.022051	-5.23568	37.6787	0.0265401	4.51565	6.31217e-06	1.30761e-05	yes
ENSBTAG00000017861	ENSBTAG00000017861	BRSK2	29:51036146-51115452	q1	q2	OK	9.02887	0.239928	-5.23387	37.6316	0.0265735	14.2092	0	0	yes
ENSBTAG00000046193	ENSBTAG00000046193	-	23:4158400-4180362	q1	q2	OK	4.32502	0.115238	-5.23002	37.5312	0.0266445	5.77359	7.76012e-09	1.96119e-08	yes
ENSBTAG00000017478	ENSBTAG00000017478	Q2KJ26_BOVIN	14:11892027-11907430	q1	q2	OK	4.00311	0.106685	-5.22969	37.5227	0.0266506	8.62832	0	0	yes
ENSBTAG00000014486	ENSBTAG00000014486	F1N1K4_BOVIN	12:36901243-36922492	q1	q2	OK	0.668604	0.0179094	-5.22236	37.3326	0.0267863	4.26237	2.02267e-05	4.02506e-05	yes
ENSBTAG00000010927	ENSBTAG00000010927	CBFA2T3	18:14096666-14174040	q1	q2	OK	1.31533	0.0355976	-5.2075	36.95	0.0270636	3.73658	0.000186537	0.000339934	yes
ENSBTAG00000011573	ENSBTAG00000011573	ENPP6	27:13749507-13826909	q1	q2	OK	1.84403	0.0501402	-5.20075	36.7775	0.0271906	4.13132	3.60692e-05	7.02303e-05	yes
ENSBTAG00000002414	ENSBTAG00000002414	A2VDQ4_BOVIN	3:9720671-9755813	q1	q2	OK	3.41504	0.0930281	-5.19809	36.7098	0.0272407	13.886	0	0	yes
ENSBTAG00000013509	ENSBTAG00000013509	A6QQZ4_BOVIN	11:98409545-98429110	q1	q2	OK	1.57438	0.0431029	-5.19086	36.5261	0.0273776	6.49319	8.40392e-11	2.39096e-10	yes
ENSBTAG00000020319	ENSBTAG00000020319	F1MQ78_BOVIN	28:44729722-44776997	q1	q2	OK	0.50699	0.0138884	-5.19001	36.5046	0.0273937	2.93248	0.00336265	0.00541137	yes
ENSBTAG00000004685	ENSBTAG00000004685	SRGAP3	22:17372629-17613438	q1	q2	OK	1.98619	0.0546369	-5.18399	36.3525	0.0275083	8.47157	0	0	yes
ENSBTAG00000012032	ENSBTAG00000012032	A6QQQ0_BOVIN	7:16176855-16215655	q1	q2	OK	4.20463	0.115723	-5.18323	36.3336	0.0275228	10.1999	0	0	yes
ENSBTAG00000005702	ENSBTAG00000005702	CNGB1	18:25894540-25963429	q1	q2	OK	0.623697	0.0173033	-5.17173	36.045	0.027743	3.15831	0.00158686	0.00263957	yes
ENSBTAG00000002194	ENSBTAG00000002194	GCOM1	10:52673545-52771273	q1	q2	OK	4.97999	0.138291	-5.17036	36.0109	0.0277694	8.22202	2.22045e-16	8.1706e-16	yes
ENSBTAG00000021252	ENSBTAG00000021252	TMM35_BOVIN	X:54954894-54967415	q1	q2	OK	0.509545	0.01423	-5.1622	35.8078	0.0279269	3.24071	0.00119234	0.00200963	yes
ENSBTAG00000014042	ENSBTAG00000014042	TLR10_BOVIN	6:59670232-59677223	q1	q2	OK	0.352722	0.00987293	-5.15891	35.7262	0.0279907	2.53275	0.0113172	0.0171296	yes
ENSBTAG00000011651	ENSBTAG00000011651	HECTD2	26:13062903-13133852	q1	q2	OK	0.564217	0.0158227	-5.15618	35.6587	0.0280437	2.91276	0.00358249	0.00574243	yes
ENSBTAG00000000473	ENSBTAG00000000473	ATP10D	6:67787937-67921285	q1	q2	OK	4.10523	0.115142	-5.15597	35.6536	0.0280478	14.2628	0	0	yes
ENSBTAG00000021588	ENSBTAG00000021588	SCG2_BOVIN	2:112549868-112555375	q1	q2	OK	4.0935	0.114818	-5.15592	35.6521	0.0280487	10.0636	0	0	yes
ENSBTAG00000004555	ENSBTAG00000004555	LRP2	2:26936762-27078521	q1	q2	NOTEST	0.0692446	0.00194658	-5.15269	35.5724	0.0281116	3.32767	0.000875759	1	no
ENSBTAG00000034435	ENSBTAG00000034435	NKD2	20:71427334-71446013	q1	q2	OK	1.58194	0.0444862	-5.1522	35.5602	0.0281212	3.34234	0.000830743	0.00142333	yes
ENSBTAG00000020887	ENSBTAG00000020887	Q9GLL3_BOVIN	16:64095721-64426026	q1	q2	NOTEST	0.144669	0.00408852	-5.14503	35.3842	0.0282613	3.32339	0.000889294	1	no
ENSBTAG00000011784	ENSBTAG00000011784	A5PKG9_BOVIN	2:126276334-126291824	q1	q2	OK	0.820659	0.0232561	-5.1411	35.2879	0.0283384	3.95363	7.69753e-05	0.000145897	yes
ENSBTAG00000019375	ENSBTAG00000019375	SCARF2	17:74523148-74534819	q1	q2	OK	1.2347	0.0351313	-5.13526	35.1453	0.0284533	5.00024	5.72586e-07	1.27986e-06	yes
ENSBTAG00000013167	ENSBTAG00000013167	SIGLEC1	13:51945278-51962376	q1	q2	NOTEST	0.25532	0.00727118	-5.13397	35.114	0.0284788	3.33509	0.000852718	1	no
ENSBTAG00000017136	ENSBTAG00000017136	F1MEN6_BOVIN	19:58718133-58719240	q1	q2	OK	1.30477	0.037189	-5.13278	35.0848	0.0285023	2.89883	0.00374559	0.00599383	yes
ENSBTAG00000013157	ENSBTAG00000013157	NOVA2	18:53874462-53889874	q1	q2	OK	4.65278	0.134512	-5.11229	34.5901	0.02891	7.91474	2.44249e-15	8.65485e-15	yes
ENSBTAG00000016327	ENSBTAG00000016327	A4UQU4_BOVIN	10:65395124-65427753	q1	q2	OK	0.813948	0.02358	-5.1093	34.5186	0.0289699	3.23252	0.00122704	0.00206598	yes
ENSBTAG00000000183	ENSBTAG00000000183	TRAT1	1:53995475-54043198	q1	q2	OK	0.392197	0.0113695	-5.10833	34.4955	0.0289894	3.20509	0.00135019	0.00226278	yes
ENSBTAG00000015246	ENSBTAG00000015246	TAS1R2	2:134390906-134404755	q1	q2	OK	0.447555	0.0129988	-5.10561	34.4305	0.0290441	2.46705	0.0136232	0.0203921	yes
ENSBTAG00000013290	ENSBTAG00000013290	DYSF	11:12894978-13123270	q1	q2	OK	1.86304	0.0543868	-5.09826	34.2554	0.0291925	12.3395	0	0	yes
ENSBTAG00000010328	ENSBTAG00000010328	Q8HZT2_BOVIN	23:13160209-13172869	q1	q2	OK	27.9565	0.817254	-5.09625	34.2078	0.0292332	20.4606	0	0	yes
ENSBTAG00000033699	ENSBTAG00000033699	A6QQE4_BOVIN	15:77249973-77254055	q1	q2	OK	6.05675	0.177535	-5.09237	34.1158	0.0293119	11.7848	0	0	yes
ENSBTAG00000011820	ENSBTAG00000011820	DAPK2	10:46006653-46130505	q1	q2	OK	2.29531	0.0677802	-5.08168	33.864	0.0295299	5.65794	1.53201e-08	3.80325e-08	yes
ENSBTAG00000008329	ENSBTAG00000008329	A7MBB2_BOVIN	2:38682029-38711144	q1	q2	OK	2.95484	0.0873573	-5.08001	33.8248	0.0295641	8.19629	2.22045e-16	8.1706e-16	yes
ENSBTAG00000014225	ENSBTAG00000014225	E1B749_BOVIN	3:98567048-98587443	q1	q2	OK	3.67408	0.109696	-5.0658	33.4933	0.0298567	8.56699	0	0	yes
ENSBTAG00000018137	ENSBTAG00000018137	A2MG_BOVIN	5:101298126-101346611	q1	q2	OK	15.3846	0.460032	-5.06361	33.4425	0.0299021	28.7158	0	0	yes
ENSBTAG00000040316	ENSBTAG00000040316	A4IFP4_BOVIN	19:37020549-37026396	q1	q2	OK	15.9783	0.480428	-5.05565	33.2585	0.0300675	12.5996	0	0	yes
ENSBTAG00000010244	ENSBTAG00000010244	CLIC5	23:19167357-19333272	q1	q2	OK	1.2108	0.036579	-5.0488	33.101	0.0302106	3.01156	0.0025991	0.00422906	yes
ENSBTAG00000046662	ENSBTAG00000046662	TRPM5	29:49817286-49835313	q1	q2	OK	0.973406	0.0294099	-5.04867	33.0979	0.0302134	5.64557	1.64639e-08	4.07664e-08	yes
ENSBTAG00000006173	ENSBTAG00000006173	Q2TA26_BOVIN	17:74110523-74113523	q1	q2	OK	1.74858	0.0530672	-5.04222	32.9503	0.0303487	5.61083	2.01356e-08	4.95637e-08	yes
ENSBTAG00000017986	ENSBTAG00000017986	GLIS1	3:93208980-93308964	q1	q2	OK	1.55247	0.0471704	-5.04054	32.912	0.0303841	5.45659	4.85354e-08	1.1668e-07	yes
ENSBTAG00000018331	ENSBTAG00000018331	TETN_BOVIN	22:54791194-54797301	q1	q2	OK	1.50282	0.045806	-5.03599	32.8084	0.0304801	2.61406	0.00894728	0.0136966	yes
ENSBTAG00000005941	ENSBTAG00000005941	-	10:24062421-24062915	q1	q2	OK	5.05095	0.15467	-5.02929	32.6563	0.030622	3.43455	0.000593537	0.00103302	yes
ENSBTAG00000005231	ENSBTAG00000005231	-	16:52023630-52076607	q1	q2	OK	0.572609	0.0175698	-5.02638	32.5905	0.0306838	3.63047	0.00028291	0.000507206	yes
ENSBTAG00000024950	ENSBTAG00000024950	ACE	19:48447901-48467904	q1	q2	OK	0.49925	0.015401	-5.01866	32.4167	0.0308484	3.26272	0.00110347	0.00186681	yes
ENSBTAG00000007156	ENSBTAG00000007156	AGAP2	5:56051445-56062903	q1	q2	OK	2.02877	0.0626933	-5.01615	32.3602	0.0309021	9.15949	0	0	yes
ENSBTAG00000039522	ENSBTAG00000039522	CYC2_BOVIN	2:18780935-18799857	q1	q2	OK	2.52951	0.078212	-5.01533	32.3417	0.0309197	2.55885	0.0105019	0.0159609	yes
ENSBTAG00000032631	ENSBTAG00000032631	-	21:33913532-33920717	q1	q2	OK	0.402812	0.0124988	-5.01025	32.2281	0.0310288	3.14046	0.00168682	0.00280099	yes
ENSBTAG00000004078	ENSBTAG00000004078	KCNH2	4:114325567-114357974	q1	q2	OK	1.38466	0.0429893	-5.00941	32.2094	0.0310468	7.25378	4.05231e-13	1.29236e-12	yes
ENSBTAG00000045695	ENSBTAG00000045695	SLC6A19	20:71302632-71318130	q1	q2	OK	0.458634	0.0143857	-4.99464	31.8812	0.0313663	3.13128	0.00174044	0.00288618	yes
ENSBTAG00000002138	ENSBTAG00000002138	A6QLC1_BOVIN	2:135922929-135967599	q1	q2	OK	6.00665	0.188487	-4.99402	31.8677	0.0313798	15.8115	0	0	yes
ENSBTAG00000039974	ENSBTAG00000039974	SSTR5	25:857166-858273	q1	q2	OK	0.916531	0.0290863	-4.97777	31.5107	0.0317352	3.11961	0.00181089	0.00299812	yes
ENSBTAG00000015994	ENSBTAG00000015994	LRRC63	12:16361600-16394987	q1	q2	OK	1.44622	0.0459483	-4.97613	31.4749	0.0317713	4.2317	2.31936e-05	4.59578e-05	yes
ENSBTAG00000014237	ENSBTAG00000014237	CYTH4	5:76080308-76111131	q1	q2	OK	0.806867	0.0257437	-4.97004	31.3423	0.0319057	4.26654	1.98527e-05	3.95547e-05	yes
ENSBTAG00000011375	ENSBTAG00000011375	SHC3	8:90549998-90640714	q1	q2	OK	2.00065	0.0638655	-4.96929	31.326	0.0319223	4.70806	2.50084e-06	5.33837e-06	yes
ENSBTAG00000027074	ENSBTAG00000027074	A4FUY0_BOVIN	21:16214669-16460490	q1	q2	NOTEST	0.230489	0.00737618	-4.96568	31.2477	0.0320023	3.21653	0.0012975	1	no
ENSBTAG00000036078	ENSBTAG00000036078	EMP1	5:97081920-97101600	q1	q2	OK	141.922	4.54591	-4.96438	31.2197	0.0320312	29.2763	0	0	yes
ENSBTAG00000039355	ENSBTAG00000039355	Q2V6R8_BOVIN	7:44773997-44778671	q1	q2	OK	7.25099	0.232805	-4.96098	31.1462	0.0321067	10.8512	0	0	yes
ENSBTAG00000010788	ENSBTAG00000010788	PPM1E	19:10143538-10164011	q1	q2	OK	0.561243	0.0181188	-4.95307	30.9757	0.0322833	2.42863	0.0151559	0.0225289	yes
ENSBTAG00000039817	ENSBTAG00000039817	-	5:102393239-102427984	q1	q2	NOTEST	0.129488	0.0041925	-4.94886	30.8856	0.0323776	1.60714	0.108025	1	no
ENSBTAG00000017716	ENSBTAG00000017716	BEGAIN	21:67072574-67100143	q1	q2	OK	0.476381	0.0154452	-4.94688	30.8433	0.0324221	3.18889	0.00142821	0.00238665	yes
ENSBTAG00000048022	ENSBTAG00000048022	FRRS1	3:43619569-43629406	q1	q2	OK	6.00885	0.195377	-4.94276	30.7552	0.0325148	6.06046	1.35731e-09	3.59563e-09	yes
ENSBTAG00000008274	ENSBTAG00000008274	MUC5B	29:51371104-51461957	q1	q2	OK	2.19893	0.0719283	-4.9341	30.5711	0.0327106	21.7754	0	0	yes
ENSBTAG00000014596	ENSBTAG00000014596	EFHD1_BOVIN	3:113006124-113050192	q1	q2	OK	2.69262	0.0881182	-4.93343	30.5569	0.0327257	7.04034	1.91758e-12	5.925e-12	yes
ENSBTAG00000011677	ENSBTAG00000011677	H11_BOVIN	23:31636946-31637588	q1	q2	OK	32.9932	1.08312	-4.92891	30.4613	0.0328284	13.3873	0	0	yes
ENSBTAG00000019277	ENSBTAG00000019277	KCNH3	5:30435180-30463019	q1	q2	OK	4.64091	0.152409	-4.92838	30.4504	0.0328405	13.8806	0	0	yes
ENSBTAG00000001154	ENSBTAG00000001154	DGAT2	15:55940756-55973229	q1	q2	OK	11.9135	0.392293	-4.92452	30.3689	0.0329285	18.2749	0	0	yes
ENSBTAG00000026751	ENSBTAG00000026751	CCDC108	2:107669012-107706257	q1	q2	NOTEST	0.182464	0.00601633	-4.92259	30.3281	0.0329726	2.63586	0.00839241	1	no
ENSBTAG00000037693	ENSBTAG00000037693	-	7:14314679-14378558	q1	q2	NOTEST	0.230795	0.00763132	-4.91854	30.2431	0.0330653	2.37297	0.0176455	1	no
ENSBTAG00000011759	ENSBTAG00000011759	C1QL1	19:45288724-45295349	q1	q2	OK	29.8261	0.988073	-4.91581	30.1861	0.0331279	14.6513	0	0	yes
ENSBTAG00000004222	ENSBTAG00000004222	SAT2_BOVIN	19:27953738-27955396	q1	q2	OK	1.49668	0.0498305	-4.90859	30.0354	0.0332941	3.24298	0.00118285	0.00199468	yes
ENSBTAG00000030705	ENSBTAG00000030705	DACT3	18:54208181-54218832	q1	q2	OK	5.69442	0.189806	-4.90695	30.0013	0.033332	9.62594	0	0	yes
ENSBTAG00000045757	ENSBTAG00000045757	TNNC1_BOVIN	22:48988983-48991875	q1	q2	OK	2.36018	0.0794378	-4.89293	29.711	0.0336575	3.16845	0.00153255	0.0025529	yes
ENSBTAG00000016864	ENSBTAG00000016864	LBP	13:67874473-67910095	q1	q2	OK	5.91667	0.199395	-4.89108	29.6731	0.0337006	10.6781	0	0	yes
ENSBTAG00000011321	ENSBTAG00000011321	C8orf80	8:10591922-10632157	q1	q2	OK	0.577725	0.0194771	-4.89054	29.6618	0.0337133	3.57245	0.000353658	0.000628227	yes
ENSBTAG00000014906	ENSBTAG00000014906	VCAN	7:85666057-85782896	q1	q2	OK	0.750385	0.0253243	-4.88904	29.631	0.0337483	7.88673	3.10862e-15	1.09627e-14	yes
ENSBTAG00000001051	ENSBTAG00000001051	OSCAR	18:63467219-63474744	q1	q2	OK	1.30761	0.0441983	-4.8868	29.5851	0.0338008	1.96796	0.0490725	0.0683135	no
ENSBTAG00000040399	ENSBTAG00000040399	VWA5B2	1:83546312-83557613	q1	q2	OK	5.92177	0.200364	-4.88533	29.5551	0.0338352	16.0618	0	0	yes
ENSBTAG00000000309	ENSBTAG00000000309	PTPRT	13:71397828-71678072	q1	q2	OK	0.601777	0.0203866	-4.88353	29.5183	0.0338775	3.08666	0.00202422	0.00333165	yes
ENSBTAG00000006683	ENSBTAG00000006683	ZFYVE28	6:108429349-108481941	q1	q2	OK	0.886516	0.0300886	-4.88086	29.4635	0.0339402	4.68556	2.79199e-06	5.94114e-06	yes
ENSBTAG00000013479	ENSBTAG00000013479	SLC9A3R2	25:1575648-1589619	q1	q2	OK	1.54605	0.0524761	-4.88078	29.462	0.0339421	4.49886	6.83195e-06	1.4124e-05	yes
ENSBTAG00000008477	ENSBTAG00000008477	-	29:48068208-48070209	q1	q2	OK	0.336989	0.0114626	-4.87769	29.399	0.0340149	1.53854	0.123916	0.162047	no
ENSBTAG00000005215	ENSBTAG00000005215	IL10RA	15:29093383-29102483	q1	q2	OK	1.4308	0.048917	-4.87034	29.2495	0.0341886	4.97256	6.60737e-07	1.47204e-06	yes
ENSBTAG00000017943	ENSBTAG00000017943	A6H6Z5_BOVIN	5:28576319-28615499	q1	q2	OK	0.403716	0.0138622	-4.86411	29.1235	0.0343366	3.31495	0.000916607	0.00156205	yes
ENSBTAG00000012348	ENSBTAG00000012348	A7Z081_BOVIN	3:13973122-13985544	q1	q2	OK	11.4238	0.392873	-4.86184	29.0776	0.0343906	20.1033	0	0	yes
ENSBTAG00000043951	ENSBTAG00000043951	IMPA2	24:43189864-43209021	q1	q2	OK	22.5462	0.77642	-4.8599	29.0387	0.0344369	15.961	0	0	yes
ENSBTAG00000026344	ENSBTAG00000026344	MAFA	14:2426856-2427912	q1	q2	OK	3.18756	0.109805	-4.85944	29.0293	0.0344479	5.40166	6.6027e-08	1.57312e-07	yes
ENSBTAG00000010103	ENSBTAG00000010103	TRIM9_BOVIN	10:43871177-43988950	q1	q2	NOTEST	0.152303	0.00525854	-4.85613	28.963	0.034527	1.92527	0.0541951	1	no
ENSBTAG00000002804	ENSBTAG00000002804	F1MBP1_BOVIN	7:63496229-63532702	q1	q2	OK	0.407827	0.0140899	-4.85523	28.9446	0.0345486	3.98401	6.77631e-05	0.000128977	yes
ENSBTAG00000039470	ENSBTAG00000039470	WC1	5:103132708-103261137	q1	q2	OK	0.701939	0.024284	-4.85327	28.9054	0.0345955	2.54432	0.0109492	0.0166097	yes
ENSBTAG00000015638	ENSBTAG00000015638	IL20RA	9:75979323-76012398	q1	q2	OK	3.05513	0.106021	-4.84882	28.8163	0.0347024	7.5772	3.53051e-14	1.18348e-13	yes
ENSBTAG00000026963	ENSBTAG00000026963	NCALD_BOVIN	14:64875134-64898581	q1	q2	OK	0.47506	0.0165632	-4.84206	28.6817	0.0348654	3.11776	0.0018223	0.00301641	yes
ENSBTAG00000006859	ENSBTAG00000006859	-	18:51735955-51780801	q1	q2	OK	2.11229	0.0736703	-4.84158	28.6722	0.034877	6.87055	6.39555e-12	1.91961e-11	yes
ENSBTAG00000014758	ENSBTAG00000014758	Q17QW8_BOVIN	5:48917721-49009466	q1	q2	OK	0.994749	0.0348019	-4.8371	28.5832	0.0349855	3.53639	0.000405638	0.000717274	yes
ENSBTAG00000038361	ENSBTAG00000038361	A5PK77_BOVIN	21:59650975-59664635	q1	q2	OK	2.60734	0.0912903	-4.83597	28.561	0.0350129	5.96544	2.43975e-09	6.35445e-09	yes
ENSBTAG00000015059	ENSBTAG00000015059	MMP13	15:5912036-5922736	q1	q2	OK	26.642	0.93342	-4.83503	28.5423	0.0350357	21.0625	0	0	yes
ENSBTAG00000038496	ENSBTAG00000038496	E3UM65_BOVIN	16:5253452-5302725	q1	q2	OK	0.308124	0.0108134	-4.83263	28.4946	0.035094	3.13902	0.00169515	0.00281423	yes
ENSBTAG00000001041	ENSBTAG00000001041	AOCX_BOVIN	19:43555807-43559784	q1	q2	NOTEST	0.210922	0.00740266	-4.83252	28.4927	0.0350967	2.06725	0.0387102	1	no
ENSBTAG00000019712	ENSBTAG00000019712	ST14	29:36933305-36971367	q1	q2	OK	4.53603	0.160016	-4.82514	28.3474	0.0352767	12.7239	0	0	yes
ENSBTAG00000026638	ENSBTAG00000026638	CATSPER4	2:127488534-127499030	q1	q2	OK	1.72772	0.0609962	-4.824	28.325	0.0353046	3.12492	0.00177855	0.00294669	yes
ENSBTAG00000004226	ENSBTAG00000004226	A5PKC2_BOVIN	19:27955572-27960099	q1	q2	OK	0.612683	0.0216495	-4.82273	28.3001	0.0353357	3.10389	0.00190996	0.00315475	yes
ENSBTAG00000047101	ENSBTAG00000047101	-	10:81675808-81677905	q1	q2	OK	1.03814	0.0366998	-4.82208	28.2873	0.0353516	4.58789	4.47745e-06	9.37321e-06	yes
ENSBTAG00000012601	ENSBTAG00000012601	TEKT4_BOVIN	25:871130-877122	q1	q2	OK	1.08309	0.038361	-4.81938	28.2341	0.0354178	2.87113	0.00409011	0.00651119	yes
ENSBTAG00000007068	ENSBTAG00000007068	SH3BGR	1:141029892-141100984	q1	q2	OK	0.928203	0.0329194	-4.81743	28.1962	0.0354657	3.2812	0.00103367	0.00175347	yes
ENSBTAG00000015387	ENSBTAG00000015387	A6QQY0_BOVIN	19:50579226-50604298	q1	q2	OK	3.25748	0.115784	-4.81425	28.1341	0.035544	7.61219	2.68674e-14	9.05863e-14	yes
ENSBTAG00000019293	ENSBTAG00000019293	EGR3	8:70503687-70506163	q1	q2	OK	1.12984	0.040182	-4.81342	28.1181	0.0355645	3.11479	0.00184076	0.00304541	yes
ENSBTAG00000011037	ENSBTAG00000011037	RBPMS2	10:45380344-45392030	q1	q2	OK	1.76185	0.0628365	-4.80935	28.0386	0.0356649	4.35809	1.312e-05	2.65336e-05	yes
ENSBTAG00000038568	ENSBTAG00000038568	F1N5M6_BOVIN	25:2256599-2268388	q1	q2	OK	1.14543	0.0410803	-4.8013	27.8827	0.0358645	2.27864	0.0226883	0.0330818	yes
ENSBTAG00000039141	ENSBTAG00000039141	TMEM74	14:57784158-57785076	q1	q2	OK	6.56206	0.235563	-4.79996	27.8569	0.0358978	7.77761	7.32747e-15	2.54762e-14	yes
ENSBTAG00000033326	ENSBTAG00000033326	DPEP1_BOVIN	18:14578305-14584239	q1	q2	OK	0.663572	0.0239429	-4.79258	27.7148	0.0360819	3.26411	0.00109809	0.00185828	yes
ENSBTAG00000014135	ENSBTAG00000014135	WDR17	27:6625351-6673110	q1	q2	OK	2.1237	0.0768647	-4.78812	27.6291	0.0361936	10.069	0	0	yes
ENSBTAG00000038325	ENSBTAG00000038325	EST4A_BOVIN	18:34795757-34810221	q1	q2	OK	0.340911	0.0124221	-4.77842	27.4439	0.0364378	2.98863	0.00280231	0.00454199	yes
ENSBTAG00000013801	ENSBTAG00000013801	PBX1	3:4228462-4527283	q1	q2	OK	1.99733	0.073775	-4.7588	27.0733	0.0369367	5.22167	1.77315e-07	4.10848e-07	yes
ENSBTAG00000003531	ENSBTAG00000003531	ABCA13	4:7096629-7487703	q1	q2	OK	0.468078	0.0174084	-4.74889	26.8881	0.0371913	9.3744	0	0	yes
ENSBTAG00000018984	ENSBTAG00000018984	PIK3CD	16:44674361-44688066	q1	q2	OK	7.43111	0.279113	-4.73465	26.624	0.0375602	17.2016	0	0	yes
ENSBTAG00000002644	ENSBTAG00000002644	KCNQ4	3:105977254-106003115	q1	q2	OK	0.507126	0.0190483	-4.73461	26.6232	0.0375613	2.53176	0.0113492	0.0171734	yes
ENSBTAG00000021425	ENSBTAG00000021425	LMAN1L	21:34248043-34259808	q1	q2	OK	0.768935	0.0289376	-4.73184	26.5722	0.0376335	3.56423	0.000364924	0.000647674	yes
ENSBTAG00000011543	ENSBTAG00000011543	A4FV85_BOVIN	3:121284544-121294475	q1	q2	OK	1.72522	0.0650904	-4.72819	26.505	0.0377288	5.33969	9.31042e-08	2.19765e-07	yes
ENSBTAG00000047404	ENSBTAG00000047404	-	X:138379923-138380874	q1	q2	OK	2.19027	0.0826791	-4.72744	26.4912	0.0377484	3.49978	0.000465641	0.000818658	yes
ENSBTAG00000016551	ENSBTAG00000016551	-	29:43149609-43154681	q1	q2	OK	0.392503	0.0148339	-4.72573	26.4599	0.0377932	1.70515	0.0881657	0.11833	no
ENSBTAG00000001535	ENSBTAG00000001535	LIPH	1:82243014-82278080	q1	q2	OK	16.1417	0.610122	-4.72555	26.4565	0.0377979	16.2599	0	0	yes
ENSBTAG00000039847	ENSBTAG00000039847	-	5:102324543-102353256	q1	q2	NOTEST	0.142217	0.00539333	-4.72078	26.3691	0.0379231	1.20682	0.2275	1	no
ENSBTAG00000013103	ENSBTAG00000013103	CO1A1_BOVIN	19:37088245-37104998	q1	q2	OK	5.93546	0.226253	-4.71335	26.2337	0.0381189	18.7736	0	0	yes
ENSBTAG00000000720	ENSBTAG00000000720	A4IFS7_BOVIN	8:82365268-82371037	q1	q2	OK	16.8577	0.642834	-4.71282	26.224	0.0381329	15.9145	0	0	yes
ENSBTAG00000001447	ENSBTAG00000001447	A5D795_BOVIN	22:55929987-55931463	q1	q2	OK	0.596615	0.0227582	-4.71234	26.2154	0.0381456	3.2052	0.00134967	0.00226215	yes
ENSBTAG00000036224	ENSBTAG00000036224	MGC157082	18:61318605-61401807	q1	q2	NOTEST	0.0784089	0.0029951	-4.71034	26.1791	0.0381985	0.59645	0.550875	1	no
ENSBTAG00000044119	ENSBTAG00000044119	KSR2	17:59486326-59916267	q1	q2	OK	0.382266	0.0146067	-4.70987	26.1706	0.038211	3.04562	0.00232198	0.003796	yes
ENSBTAG00000046547	ENSBTAG00000046547	-	24:43217454-43224463	q1	q2	OK	10.0677	0.386325	-4.70378	26.0602	0.0383726	3.57868	0.000345338	0.000613984	yes
ENSBTAG00000024904	ENSBTAG00000024904	KIAA1683	7:4843441-4910673	q1	q2	OK	4.70238	0.180451	-4.70371	26.059	0.0383745	15.3815	0	0	yes
ENSBTAG00000027407	ENSBTAG00000027407	A6QPW7_BOVIN	13:54526442-54527951	q1	q2	OK	26.8919	1.03447	-4.70021	25.9958	0.0384677	16.8999	0	0	yes
ENSBTAG00000005247	ENSBTAG00000005247	FRMD3	8:77785286-77910313	q1	q2	OK	1.91968	0.0739605	-4.69796	25.9555	0.0385277	4.19483	2.73082e-05	5.37637e-05	yes
ENSBTAG00000012263	ENSBTAG00000012263	ASAP3	2:129969268-130018036	q1	q2	OK	6.37025	0.245463	-4.69777	25.952	0.0385328	14.6704	0	0	yes
ENSBTAG00000011124	ENSBTAG00000011124	Q2TEA4_BOVIN	11:103734903-103741625	q1	q2	OK	1.75711	0.0677102	-4.69768	25.9504	0.0385352	6.70581	2.00295e-11	5.88478e-11	yes
ENSBTAG00000022360	ENSBTAG00000022360	A4FUB3_BOVIN	5:86571272-87036285	q1	q2	OK	0.311972	0.0120504	-4.69427	25.8889	0.0386264	2.43159	0.0150329	0.0223563	yes
ENSBTAG00000034368	ENSBTAG00000034368	PRSS33	25:2272631-2275410	q1	q2	OK	1.06125	0.041274	-4.68439	25.7123	0.0388918	2.92528	0.00344151	0.00553171	yes
ENSBTAG00000015985	ENSBTAG00000015985	GPR20	14:3639631-3640717	q1	q2	OK	20.0926	0.781698	-4.68391	25.7038	0.0389047	15.1374	0	0	yes
ENSBTAG00000014682	ENSBTAG00000014682	AANAT	19:55917179-55918416	q1	q2	OK	1.59834	0.0624397	-4.67796	25.5981	0.0390655	2.92084	0.00349085	0.00560549	yes
ENSBTAG00000012991	ENSBTAG00000012991	A7Z048_BOVIN	8:52957816-53196562	q1	q2	OK	0.718306	0.0281133	-4.67528	25.5504	0.0391382	6.2544	3.99041e-10	1.09305e-09	yes
ENSBTAG00000002070	ENSBTAG00000002070	KLC3	18:53401749-53425412	q1	q2	OK	2.47529	0.0970198	-4.67318	25.5132	0.0391952	5.31609	1.06021e-07	2.4917e-07	yes
ENSBTAG00000030179	ENSBTAG00000030179	MAPK8IP2	5:120127055-120137203	q1	q2	OK	0.500622	0.0196389	-4.67193	25.4913	0.0392292	3.6397	0.000272953	0.000490055	yes
ENSBTAG00000047709	ENSBTAG00000047709	-	X:123603171-123605485	q1	q2	OK	1.4822	0.058175	-4.67119	25.4783	0.0392493	3.32275	0.000891342	0.00152155	yes
ENSBTAG00000047363	ENSBTAG00000047363	-	27:5327038-5328959	q1	q2	OK	3.07142	0.120583	-4.67081	25.4714	0.0392596	1.65479	0.0979672	0.13043	no
ENSBTAG00000016968	ENSBTAG00000016968	Q1LZD4_BOVIN	18:39665072-39671884	q1	q2	OK	0.437351	0.0171729	-4.67058	25.4675	0.0392659	2.43334	0.0149604	0.0222505	yes
ENSBTAG00000033886	ENSBTAG00000033886	CIST1	7:4843441-4910673	q1	q2	OK	40.111	1.57581	-4.66984	25.4542	0.039286	17.6675	0	0	yes
ENSBTAG00000020809	ENSBTAG00000020809	SLC36A2	7:64561458-64587897	q1	q2	OK	1.12272	0.0441543	-4.6683	25.4272	0.039328	3.69652	0.000218575	0.000395878	yes
ENSBTAG00000024492	ENSBTAG00000024492	-	16:52660394-52665705	q1	q2	OK	5.64657	0.222369	-4.66635	25.3928	0.0393812	9.8548	0	0	yes
ENSBTAG00000000987	ENSBTAG00000000987	-	15:35409566-35496594	q1	q2	NOTEST	0.195011	0.007683	-4.66574	25.3821	0.0393978	3.7134	0.000204497	1	no
ENSBTAG00000047650	ENSBTAG00000047650	NXPH4	5:56548138-56556988	q1	q2	OK	20.4411	0.805556	-4.66534	25.3751	0.0394088	14.9645	0	0	yes
ENSBTAG00000006999	ENSBTAG00000006999	RYR1	18:48502351-48631056	q1	q2	OK	0.900083	0.0356178	-4.65939	25.2706	0.0395716	13.4183	0	0	yes
ENSBTAG00000004048	ENSBTAG00000004048	MCHR1	5:112510410-112513883	q1	q2	OK	2.41166	0.0954725	-4.6588	25.2603	0.0395878	8.14296	4.44089e-16	1.61874e-15	yes
ENSBTAG00000002188	ENSBTAG00000002188	C16orf89	25:4088164-4102526	q1	q2	OK	1.12861	0.0446921	-4.65838	25.253	0.0395993	3.01067	0.00260674	0.00424064	yes
ENSBTAG00000006121	ENSBTAG00000006121	E1BP09_BOVIN	18:62435401-62438857	q1	q2	OK	4.63961	0.183834	-4.65753	25.238	0.0396227	6.80969	9.78106e-12	2.91426e-11	yes
ENSBTAG00000033562	ENSBTAG00000033562	A7Z015_BOVIN	19:13611603-13617403	q1	q2	OK	1.36869	0.0542953	-4.65582	25.2083	0.0396697	5.72973	1.0059e-08	2.5257e-08	yes
ENSBTAG00000006490	ENSBTAG00000006490	HLA-DOA	23:7218686-7220390	q1	q2	OK	2.19483	0.0872025	-4.6536	25.1693	0.0397308	3.90468	9.43514e-05	0.000176853	yes
ENSBTAG00000004578	ENSBTAG00000004578	LGI3	8:69964099-69970068	q1	q2	OK	1.28084	0.0509136	-4.65289	25.1571	0.0397503	4.25005	2.1372e-05	4.24413e-05	yes
ENSBTAG00000010163	ENSBTAG00000010163	F1MJW3_BOVIN	25:21080468-21108140	q1	q2	OK	0.777596	0.0310615	-4.64582	25.0341	0.0399456	3.39049	0.000697687	0.00120629	yes
ENSBTAG00000005848	ENSBTAG00000005848	PRTG	10:54764672-54838020	q1	q2	OK	0.488255	0.0196321	-4.63635	24.8702	0.0402087	3.61061	0.000305478	0.000545681	yes
ENSBTAG00000045943	ENSBTAG00000045943	ACHG_BOVIN	2:120988438-120993968	q1	q2	OK	0.51507	0.0207288	-4.63506	24.848	0.0402446	2.47669	0.0132608	0.0198862	yes
ENSBTAG00000012628	ENSBTAG00000012628	SLC1A2	15:66580652-66637083	q1	q2	OK	1.59701	0.0643469	-4.63336	24.8188	0.0402921	5.66607	1.46113e-08	3.63007e-08	yes
ENSBTAG00000004038	ENSBTAG00000004038	F1MFB7_BOVIN	25:7647411-7689263	q1	q2	OK	11.7641	0.476709	-4.62514	24.6777	0.0405223	26.0942	0	0	yes
ENSBTAG00000004356	ENSBTAG00000004356	ROBO4	29:28719988-28734705	q1	q2	OK	0.45406	0.0184454	-4.62155	24.6164	0.0406233	3.53922	0.000401315	0.000709939	yes
ENSBTAG00000019347	ENSBTAG00000019347	A6H734_BOVIN	19:40226035-40293157	q1	q2	OK	0.996179	0.0405119	-4.61999	24.5898	0.0406672	4.26883	1.96504e-05	3.9166e-05	yes
ENSBTAG00000024000	ENSBTAG00000024000	ATOH8	11:48954368-48996567	q1	q2	OK	0.531102	0.0216351	-4.61754	24.5482	0.0407363	2.98324	0.00285214	0.00461678	yes
ENSBTAG00000004562	ENSBTAG00000004562	CD207	11:13572117-13576257	q1	q2	OK	1.27692	0.0520584	-4.61639	24.5286	0.0407688	3.39101	0.00069636	0.00120412	yes
ENSBTAG00000007496	ENSBTAG00000007496	P2RX2	17:45573969-45577518	q1	q2	OK	0.671409	0.0273883	-4.61556	24.5144	0.0407923	2.98177	0.00286585	0.00463713	yes
ENSBTAG00000011336	ENSBTAG00000011336	OTOGL	5:9787258-9960051	q1	q2	NOTEST	0.142327	0.0058087	-4.61486	24.5024	0.0408121	2.89819	0.00375322	1	no
ENSBTAG00000047085	ENSBTAG00000047085	-	17:51374859-51380364	q1	q2	NOTEST	0.259832	0.0106296	-4.61142	24.4442	0.0409095	2.96068	0.00306963	1	no
ENSBTAG00000012302	ENSBTAG00000012302	RTN4RL1	19:23559325-23560666	q1	q2	OK	0.824741	0.0339334	-4.60316	24.3047	0.0411444	2.97315	0.00294757	0.00476225	yes
ENSBTAG00000003498	ENSBTAG00000003498	FAT2	7:64703773-64769031	q1	q2	OK	0.997203	0.0410714	-4.60168	24.2797	0.0411866	11.0245	0	0	yes
ENSBTAG00000003432	ENSBTAG00000003432	-	25:36366139-36396646	q1	q2	OK	0.821828	0.0340044	-4.59504	24.1683	0.0413766	8.88163	0	0	yes
ENSBTAG00000014992	ENSBTAG00000014992	ETBR2_BOVIN	16:70886829-70890746	q1	q2	OK	12.2022	0.50545	-4.59343	24.1413	0.0414228	17.0118	0	0	yes
ENSBTAG00000005812	ENSBTAG00000005812	TP73	16:50596705-50646330	q1	q2	OK	1.50422	0.0627936	-4.58225	23.955	0.0417451	5.92117	3.19653e-09	8.26334e-09	yes
ENSBTAG00000010940	ENSBTAG00000010940	F1N6K0_BOVIN	2:136635159-136637353	q1	q2	OK	2.52421	0.105757	-4.577	23.868	0.0418973	2.95612	0.00311532	0.00502181	yes
ENSBTAG00000031866	ENSBTAG00000031866	-	4:93379462-93382232	q1	q2	OK	2.86906	0.120369	-4.57504	23.8355	0.0419542	4.70916	2.4874e-06	5.31456e-06	yes
ENSBTAG00000036060	ENSBTAG00000036060	-	X:32978866-32979646	q1	q2	OK	1.5929	0.066914	-4.5732	23.8052	0.0420078	2.95326	0.00314438	0.00506764	yes
ENSBTAG00000013147	ENSBTAG00000013147	NEFH	17:70821077-70828226	q1	q2	OK	1.40112	0.0590484	-4.56854	23.7283	0.0421437	7.306	2.75113e-13	8.84844e-13	yes
ENSBTAG00000001918	ENSBTAG00000001918	STXBP5L	1:66213611-66537723	q1	q2	OK	0.472204	0.0199097	-4.56786	23.7173	0.0421635	4.63489	3.57132e-06	7.53447e-06	yes
ENSBTAG00000020766	ENSBTAG00000020766	ABCA7	7:45165706-45182208	q1	q2	OK	9.05683	0.384009	-4.55979	23.5849	0.0424001	27.7449	0	0	yes
ENSBTAG00000026111	ENSBTAG00000026111	LBH_BOVIN	11:69592078-69618485	q1	q2	OK	10.3459	0.439273	-4.5578	23.5523	0.0424586	16.8664	0	0	yes
ENSBTAG00000015654	ENSBTAG00000015654	Q2KIW1_BOVIN	4:12389566-12423459	q1	q2	OK	1.17265	0.0498074	-4.55727	23.5437	0.0424742	3.5467	0.000390086	0.000690899	yes
ENSBTAG00000004750	ENSBTAG00000004750	Q3MHE5_BOVIN	13:67460323-67498847	q1	q2	OK	0.391739	0.0166604	-4.5554	23.5132	0.0425293	3.09225	0.00198648	0.00327351	yes
ENSBTAG00000001346	ENSBTAG00000001346	STRA8	4:99767236-99786672	q1	q2	OK	2.32618	0.0990689	-4.55339	23.4804	0.0425886	4.69653	2.64614e-06	5.64037e-06	yes
ENSBTAG00000019402	ENSBTAG00000019402	CCDC37	22:61319020-61344873	q1	q2	OK	4.71568	0.20088	-4.55306	23.4751	0.0425983	11.2067	0	0	yes
ENSBTAG00000033422	ENSBTAG00000033422	HHATL	22:15452123-15460444	q1	q2	OK	0.48072	0.0205302	-4.54938	23.4153	0.0427071	2.91856	0.00351653	0.0056417	yes
ENSBTAG00000004599	ENSBTAG00000004599	TAGL3_BOVIN	1:57178553-57192433	q1	q2	OK	8.71423	0.372394	-4.54847	23.4006	0.0427341	9.90819	0	0	yes
ENSBTAG00000009876	ENSBTAG00000009876	C4BPA_BOVIN	16:4785228-4831852	q1	q2	NOTEST	0.165175	0.00710093	-4.53984	23.261	0.0429904	1.13286	0.257271	1	no
ENSBTAG00000004014	ENSBTAG00000004014	FBLN2	22:58990281-59038424	q1	q2	OK	0.682096	0.0293347	-4.53929	23.2522	0.0430068	5.43674	5.42653e-08	1.30128e-07	yes
ENSBTAG00000021066	ENSBTAG00000021066	CAPN11	23:17807297-17820479	q1	q2	OK	1.31082	0.0565184	-4.53561	23.1928	0.0431167	6.0992	1.06602e-09	2.84669e-09	yes
ENSBTAG00000031351	ENSBTAG00000031351	SEC14L4	17:71606711-71619967	q1	q2	OK	5.88958	0.254188	-4.5342	23.1702	0.0431588	8.25198	2.22045e-16	8.1706e-16	yes
ENSBTAG00000002581	ENSBTAG00000002581	A6QQE7_BOVIN	23:7011923-7018235	q1	q2	OK	0.621002	0.0268551	-4.53133	23.1242	0.0432448	2.9252	0.00344233	0.00553249	yes
ENSBTAG00000003593	ENSBTAG00000003593	ANKMY1	3:120269946-120287272	q1	q2	OK	0.360623	0.0156453	-4.52669	23.0499	0.0433841	2.22007	0.0264143	0.0381894	yes
ENSBTAG00000047933	ENSBTAG00000047933	CYP4F22	7:8629101-8651746	q1	q2	OK	1.01431	0.0441041	-4.52344	22.9981	0.0434819	3.297	0.000977246	0.00166122	yes
ENSBTAG00000021636	ENSBTAG00000021636	GPR155	2:22359362-22394217	q1	q2	OK	0.408881	0.0178179	-4.52028	22.9478	0.0435773	3.36759	0.000758284	0.00130466	yes
ENSBTAG00000031851	ENSBTAG00000031851	SELPLG	17:66557142-66573393	q1	q2	OK	1.66543	0.0727801	-4.51621	22.883	0.0437004	6.58957	4.41096e-11	1.27072e-10	yes
ENSBTAG00000008686	ENSBTAG00000008686	SLC46A3	12:31463868-31481900	q1	q2	OK	11.116	0.488712	-4.50751	22.7455	0.0439647	20.4033	0	0	yes
ENSBTAG00000007208	ENSBTAG00000007208	HDAC11	22:59089633-59103701	q1	q2	OK	19.2399	0.850333	-4.49993	22.6263	0.0441963	16.138	0	0	yes
ENSBTAG00000007450	ENSBTAG00000007450	Q0V7N2_BOVIN	23:27231724-27243367	q1	q2	OK	0.913104	0.040377	-4.49918	22.6145	0.0442193	4.60006	4.22368e-06	8.86363e-06	yes
ENSBTAG00000034320	ENSBTAG00000034320	-	8:23035514-23036091	q1	q2	OK	0.336351	0.0148843	-4.4981	22.5977	0.0442524	0.597777	0.549989	0.61165	no
ENSBTAG00000046544	ENSBTAG00000046544	SLC7A10	18:43847480-43863539	q1	q2	OK	0.65241	0.0288832	-4.49747	22.5879	0.0442717	2.44457	0.0145025	0.0216169	yes
ENSBTAG00000010647	ENSBTAG00000010647	Q0VCN4_BOVIN	8:79336287-79743284	q1	q2	OK	3.16787	0.140365	-4.49625	22.5688	0.0443092	9.63248	0	0	yes
ENSBTAG00000021924	ENSBTAG00000021924	PLA2G4E	10:37506676-37549023	q1	q2	OK	0.760789	0.0337924	-4.49273	22.5136	0.0444174	4.23888	2.24635e-05	4.45492e-05	yes
ENSBTAG00000046595	ENSBTAG00000046595	-	19:19758763-19956549	q1	q2	OK	13.8832	0.618018	-4.48955	22.4641	0.0445155	11.1704	0	0	yes
ENSBTAG00000031814	ENSBTAG00000031814	SDS	17:63302946-63311098	q1	q2	OK	177.795	7.96176	-4.48099	22.3311	0.0447804	45.6477	0	0	yes
ENSBTAG00000030885	ENSBTAG00000030885	SSC5D	18:62447619-62471100	q1	q2	OK	1.17797	0.0527628	-4.48064	22.3258	0.0447912	7.90132	2.66454e-15	9.42934e-15	yes
ENSBTAG00000008182	ENSBTAG00000008182	A6QLQ3_BOVIN	18:53501994-53508395	q1	q2	OK	1.29026	0.0578264	-4.47979	22.3126	0.0448176	6.93906	3.94729e-12	1.19982e-11	yes
ENSBTAG00000010123	ENSBTAG00000010123	APOE	18:53040104-53042792	q1	q2	OK	3.18992	0.143061	-4.47882	22.2976	0.0448478	6.41589	1.4e-10	3.94033e-10	yes
ENSBTAG00000043953	ENSBTAG00000043953	SPIB	18:57031408-57036601	q1	q2	OK	1.10515	0.0495987	-4.47779	22.2818	0.0448798	3.03525	0.0024034	0.00392398	yes
ENSBTAG00000002408	ENSBTAG00000002408	FHAD1	16:53336074-53469243	q1	q2	OK	0.568443	0.025552	-4.47551	22.2465	0.0449508	5.35668	8.47667e-08	2.00667e-07	yes
ENSBTAG00000011600	ENSBTAG00000011600	A5PK86_BOVIN	13:35600312-35626614	q1	q2	OK	1.25317	0.0566336	-4.46779	22.1277	0.045192	6.13321	8.61251e-10	2.31431e-09	yes
ENSBTAG00000017718	ENSBTAG00000017718	CCL22	18:25446366-25454407	q1	q2	OK	0.375367	0.016991	-4.46546	22.0921	0.045265	2.30881	0.0209542	0.0306632	yes
ENSBTAG00000013106	ENSBTAG00000013106	C19orf81	18:57194636-57205675	q1	q2	OK	1.76895	0.0804988	-4.45778	21.9749	0.0455066	2.2658	0.0234636	0.0341571	yes
ENSBTAG00000008997	ENSBTAG00000008997	Q1RMV1_BOVIN	11:98517161-98541363	q1	q2	OK	2.55202	0.116205	-4.45689	21.9614	0.0455347	5.83028	5.5333e-09	1.41201e-08	yes
ENSBTAG00000040103	ENSBTAG00000040103	SYT8	29:50289093-50293879	q1	q2	OK	0.576641	0.0262609	-4.45669	21.9582	0.045541	2.26523	0.0234983	0.0341984	yes
ENSBTAG00000003994	ENSBTAG00000003994	IBP3_BOVIN	4:76705104-76712709	q1	q2	OK	96.3375	4.39153	-4.4553	21.9371	0.0455849	38.2762	0	0	yes
ENSBTAG00000006630	ENSBTAG00000006630	O97740_BOVIN	18:24996724-25036121	q1	q2	OK	0.485448	0.0221351	-4.45491	21.9311	0.0455972	4.25713	2.07064e-05	4.11698e-05	yes
ENSBTAG00000015702	ENSBTAG00000015702	E1BBR5_BOVIN	26:22745903-22757812	q1	q2	OK	1.10464	0.0504213	-4.4534	21.9082	0.045645	4.39093	1.12867e-05	2.29457e-05	yes
ENSBTAG00000003894	ENSBTAG00000003894	Q0VCK8_BOVIN	18:26369829-26383749	q1	q2	OK	71.5289	3.27097	-4.45074	21.8678	0.0457292	43.7879	0	0	yes
ENSBTAG00000021426	ENSBTAG00000021426	CPLX3	21:34242438-34247229	q1	q2	OK	0.335736	0.0153574	-4.45033	21.8615	0.0457422	2.84968	0.00437626	0.00694701	yes
ENSBTAG00000000470	ENSBTAG00000000470	SIAL_BOVIN	6:38309554-38323305	q1	q2	OK	0.758831	0.0348182	-4.44587	21.7941	0.0458838	3.01354	0.00258215	0.00420401	yes
ENSBTAG00000014969	ENSBTAG00000014969	CILP2	7:3702329-3711347	q1	q2	OK	0.769256	0.0353635	-4.44313	21.7528	0.0459711	6.43552	1.23055e-10	3.47183e-10	yes
ENSBTAG00000006841	ENSBTAG00000006841	LRRC4B	18:57103009-57127435	q1	q2	OK	1.05112	0.0483879	-4.44114	21.7228	0.0460345	3.87064	0.000108552	0.000202189	yes
ENSBTAG00000031278	ENSBTAG00000031278	SNPH	13:60355541-60362412	q1	q2	OK	2.8065	0.129305	-4.43993	21.7045	0.0460731	6.79173	1.10794e-11	3.29384e-11	yes
ENSBTAG00000045879	ENSBTAG00000045879	FAM26E	9:34623077-34661582	q1	q2	OK	0.856959	0.0396818	-4.43268	21.5958	0.0463053	3.00323	0.00267129	0.00433946	yes
ENSBTAG00000002559	ENSBTAG00000002559	MIOX_BOVIN	5:119926285-120032065	q1	q2	OK	0.299784	0.0139337	-4.42727	21.515	0.0464792	0.699421	0.484289	0.547172	no
ENSBTAG00000019417	ENSBTAG00000019417	Q1RMT5_BOVIN	X:55447560-55451996	q1	q2	OK	9.30727	0.437579	-4.41074	21.2699	0.0470148	17.2138	0	0	yes
ENSBTAG00000018543	ENSBTAG00000018543	Q5E9Z3_BOVIN	2:107145490-107169192	q1	q2	OK	0.82465	0.038847	-4.40791	21.2282	0.0471072	4.91937	8.68249e-07	1.91807e-06	yes
ENSBTAG00000004126	ENSBTAG00000004126	MLF1_BOVIN	1:109763291-109793739	q1	q2	OK	18.0852	0.852689	-4.40665	21.2096	0.0471483	13.3538	0	0	yes
ENSBTAG00000015191	ENSBTAG00000015191	ABCC6	25:14577545-14643306	q1	q2	OK	1.28598	0.0606611	-4.40595	21.1994	0.0471712	6.18809	6.08981e-10	1.64703e-09	yes
ENSBTAG00000011738	ENSBTAG00000011738	TFR2	25:36471290-36482523	q1	q2	OK	3.9778	0.188525	-4.39914	21.0996	0.0473944	12.2431	0	0	yes
ENSBTAG00000030180	ENSBTAG00000030180	SHANK3	5:120169083-120217092	q1	q2	OK	1.55416	0.0740167	-4.39214	20.9974	0.0476249	4.0755	4.59154e-05	8.8638e-05	yes
ENSBTAG00000027182	ENSBTAG00000027182	NR3C2	17:9742221-10173282	q1	q2	OK	0.561779	0.0268114	-4.38909	20.953	0.0477257	4.41222	1.02316e-05	2.08319e-05	yes
ENSBTAG00000004355	ENSBTAG00000004355	ROBO3	29:28699640-28717748	q1	q2	NOTEST	0.264545	0.0126535	-4.38591	20.9069	0.047831	3.74884	0.000177654	1	no
ENSBTAG00000011818	ENSBTAG00000011818	-	25:35776552-35960746	q1	q2	OK	1.4544	0.0696803	-4.38353	20.8725	0.04791	5.27489	1.32837e-07	3.0982e-07	yes
ENSBTAG00000023338	ENSBTAG00000023338	PEG3	18:64270786-64282112	q1	q2	OK	5.1308	0.245944	-4.38278	20.8617	0.0479349	22.1866	0	0	yes
ENSBTAG00000015510	ENSBTAG00000015510	EPHB6	4:106989815-106993917	q1	q2	OK	0.898301	0.0430718	-4.38238	20.8559	0.0479482	4.18714	2.8249e-05	5.55152e-05	yes
ENSBTAG00000025471	ENSBTAG00000025471	TNFA_BOVIN	23:27533910-27536674	q1	q2	OK	0.469273	0.0226258	-4.37439	20.7406	0.0482145	2.45734	0.0139968	0.0208995	yes
ENSBTAG00000005163	ENSBTAG00000005163	S10A1_BOVIN	3:16812601-16816588	q1	q2	OK	41.4586	2.00157	-4.37246	20.713	0.048279	15.8523	0	0	yes
ENSBTAG00000008495	ENSBTAG00000008495	AP3B2	21:23429312-23466211	q1	q2	OK	0.492764	0.0237942	-4.37221	20.7094	0.0482874	4.95229	7.33452e-07	1.62869e-06	yes
ENSBTAG00000001735	ENSBTAG00000001735	ADAM11	19:45113920-45131794	q1	q2	OK	7.53599	0.364006	-4.37176	20.7029	0.0483024	14.937	0	0	yes
ENSBTAG00000001139	ENSBTAG00000001139	Q7M382_BOVIN	25:36300531-36305041	q1	q2	OK	21.755	1.05645	-4.36405	20.5926	0.0485613	24.3596	0	0	yes
ENSBTAG00000037832	ENSBTAG00000037832	ASPHD2	17:68354299-68362110	q1	q2	OK	0.801735	0.0390248	-4.36066	20.5442	0.0486755	2.59097	0.00957054	0.0146054	yes
ENSBTAG00000003526	ENSBTAG00000003526	C14orf49	21:61855014-61963799	q1	q2	OK	6.8456	0.3348	-4.35381	20.4468	0.0489072	16.3699	0	0	yes
ENSBTAG00000004263	ENSBTAG00000004263	ATP6V0A4	4:103199965-103246668	q1	q2	OK	2.86247	0.140101	-4.35272	20.4315	0.0489441	10.3682	0	0	yes
ENSBTAG00000025448	ENSBTAG00000025448	IZUMO4	7:22745269-22748344	q1	q2	OK	1.7948	0.0884658	-4.34256	20.2881	0.04929	3.68211	0.000231308	0.000418056	yes
ENSBTAG00000003387	ENSBTAG00000003387	PIP5KL1	11:98601202-98609975	q1	q2	OK	8.54487	0.421326	-4.34205	20.2809	0.0493075	11.1886	0	0	yes
ENSBTAG00000035776	ENSBTAG00000035776	CD022_BOVIN	6:96794893-97503220	q1	q2	OK	3.71125	0.183103	-4.34118	20.2686	0.0493372	4.61852	3.86495e-06	8.13074e-06	yes
ENSBTAG00000001985	ENSBTAG00000001985	SRMS	13:54591298-54597058	q1	q2	OK	1.82856	0.0903673	-4.33876	20.2348	0.04942	5.28015	1.29078e-07	3.01527e-07	yes
ENSBTAG00000032642	ENSBTAG00000032642	GSTA3	23:24935522-24957718	q1	q2	OK	2.62629	0.129854	-4.33806	20.2249	0.049444	4.71255	2.44633e-06	5.22886e-06	yes
ENSBTAG00000019818	ENSBTAG00000019818	A0JNL2_BOVIN	16:43786498-43839928	q1	q2	OK	4.35466	0.216783	-4.32824	20.0876	0.0497817	16.643	0	0	yes
ENSBTAG00000004261	ENSBTAG00000004261	SPON2	6:109224626-109228237	q1	q2	OK	12.1162	0.604689	-4.3246	20.0371	0.0499075	13.6486	0	0	yes
ENSBTAG00000014464	ENSBTAG00000014464	SEC14L3	17:71584845-71593897	q1	q2	OK	1.94639	0.0974324	-4.32026	19.9768	0.0500578	5.23028	1.69252e-07	3.92724e-07	yes
ENSBTAG00000021717	ENSBTAG00000021717	F1MWK0_BOVIN	21:62701849-62743837	q1	q2	OK	3.01705	0.151029	-4.32024	19.9766	0.0500585	6.78381	1.17044e-11	3.47713e-11	yes
ENSBTAG00000005762	ENSBTAG00000005762	LYNX1_BOVIN	14:2814586-2816685	q1	q2	OK	0.931934	0.04678	-4.31626	19.9216	0.0501968	2.68301	0.00729638	0.0113142	yes
ENSBTAG00000046155	ENSBTAG00000046155	RGN_BOVIN	X:90732501-90747294	q1	q2	OK	0.496298	0.0249318	-4.31515	19.9062	0.0502355	2.91846	0.00351764	0.00564293	yes
ENSBTAG00000002127	ENSBTAG00000002127	T11L2_BOVIN	5:70013666-70054229	q1	q2	OK	7.11796	0.36135	-4.29999	19.6982	0.0507661	19.1095	0	0	yes
ENSBTAG00000020939	ENSBTAG00000020939	PLAC9_BOVIN	28:35366024-35378318	q1	q2	OK	0.948948	0.0482179	-4.29869	19.6804	0.0508119	3.14641	0.00165289	0.00274688	yes
ENSBTAG00000019881	ENSBTAG00000019881	ZNF474	7:32973282-33031108	q1	q2	OK	0.387302	0.019688	-4.29807	19.672	0.0508337	2.18102	0.0291823	0.0419231	yes
ENSBTAG00000010551	ENSBTAG00000010551	AT1A2_BOVIN	3:9645439-9670496	q1	q2	NOTEST	0.124564	0.00633398	-4.29763	19.666	0.0508492	2.23282	0.0255605	1	no
ENSBTAG00000016667	ENSBTAG00000016667	ZBTB46	13:54471016-54499223	q1	q2	OK	4.12858	0.211282	-4.2884	19.5406	0.0511756	9.80594	0	0	yes
ENSBTAG00000006357	ENSBTAG00000006357	CRIP3	23:16865820-16875110	q1	q2	OK	1.32878	0.068048	-4.28741	19.5271	0.0512107	3.56663	0.000361605	0.000641924	yes
ENSBTAG00000012201	ENSBTAG00000012201	CYP3A5	25:37025334-37044626	q1	q2	NOTEST	0.136076	0.00697291	-4.2865	19.515	0.051243	0.941197	0.346604	1	no
ENSBTAG00000031184	ENSBTAG00000031184	Q2HJM8_BOVIN	29:49368786-49370785	q1	q2	OK	23.44	1.20155	-4.286	19.5081	0.0512608	18.1487	0	0	yes
ENSBTAG00000019770	ENSBTAG00000019770	APOA4	15:27906598-27909370	q1	q2	OK	0.675661	0.0346353	-4.28598	19.5079	0.0512615	2.99215	0.00277016	0.00449122	yes
ENSBTAG00000048246	ENSBTAG00000048246	DPP4	2:34487843-34571758	q1	q2	OK	3.74062	0.192051	-4.28371	19.4772	0.0513422	6.00738	1.8854e-09	4.94624e-09	yes
ENSBTAG00000019798	ENSBTAG00000019798	PIGR	16:4533504-4551569	q1	q2	OK	1.97495	0.101539	-4.28172	19.4502	0.0514131	9.37237	0	0	yes
ENSBTAG00000013991	ENSBTAG00000013991	NR2E1	9:42435612-42456081	q1	q2	OK	3.39916	0.175118	-4.27878	19.4107	0.051518	8.76837	0	0	yes
ENSBTAG00000038844	ENSBTAG00000038844	ANKRD35	3:21588493-21605094	q1	q2	OK	0.430027	0.02217	-4.27775	19.3968	0.0515548	3.93847	8.20027e-05	0.000154866	yes
ENSBTAG00000006870	ENSBTAG00000006870	Q5E9S7_BOVIN	28:13689050-13698277	q1	q2	OK	3.81832	0.196948	-4.27705	19.3875	0.0515798	8.88812	0	0	yes
ENSBTAG00000017823	ENSBTAG00000017823	WDR16	19:29490006-29515510	q1	q2	OK	0.517293	0.0268125	-4.27	19.293	0.0518325	3.2538	0.00113872	0.00192384	yes
ENSBTAG00000012043	ENSBTAG00000012043	PADI3	2:135891756-135920584	q1	q2	OK	3.10377	0.161006	-4.26884	19.2774	0.0518742	8.72883	0	0	yes
ENSBTAG00000008192	ENSBTAG00000008192	LPPR2	7:16982663-16990838	q1	q2	OK	2.91159	0.151323	-4.2661	19.2409	0.0519728	9.71776	0	0	yes
ENSBTAG00000040477	ENSBTAG00000040477	CHD5	16:48024409-48077736	q1	q2	OK	3.00055	0.156553	-4.26051	19.1664	0.0521745	15.9963	0	0	yes
ENSBTAG00000017866	ENSBTAG00000017866	CD36_BOVIN	4:40581483-40643369	q1	q2	OK	0.384907	0.0200967	-4.25948	19.1527	0.0522118	2.98373	0.00284761	0.00461036	yes
ENSBTAG00000009349	ENSBTAG00000009349	MMEL1	16:51517448-51552204	q1	q2	OK	0.38541	0.0201347	-4.25864	19.1416	0.0522422	3.05148	0.00227713	0.00372642	yes
ENSBTAG00000021485	ENSBTAG00000021485	CA054_BOVIN	3:20406683-20413546	q1	q2	OK	5.06138	0.264665	-4.25729	19.1237	0.0522911	4.34857	1.37028e-05	2.76676e-05	yes
ENSBTAG00000020580	ENSBTAG00000020580	TCN1	15:84389635-84404937	q1	q2	OK	7.36963	0.386196	-4.25419	19.0826	0.0524036	11.6044	0	0	yes
ENSBTAG00000019146	ENSBTAG00000019146	E1B7M8_BOVIN	17:71771702-71894872	q1	q2	OK	1.19469	0.0626225	-4.25381	19.0776	0.0524174	8.12608	4.44089e-16	1.61874e-15	yes
ENSBTAG00000003152	ENSBTAG00000003152	IFI27	21:59330562-59336752	q1	q2	OK	0.732976	0.0385621	-4.24851	19.0077	0.0526103	2.66639	0.00766707	0.0118585	yes
ENSBTAG00000013095	ENSBTAG00000013095	FOXN1	19:20548271-20561593	q1	q2	OK	3.34466	0.176033	-4.24794	19.0002	0.0526311	9.06289	0	0	yes
ENSBTAG00000034295	ENSBTAG00000034295	E5RX11_BOVIN	5:104029018-104036158	q1	q2	OK	0.528022	0.0277913	-4.2479	18.9995	0.0526326	3.23968	0.00119666	0.00201649	yes
ENSBTAG00000000085	ENSBTAG00000000085	F1MHN9_BOVIN	21:34314500-34321201	q1	q2	OK	0.464995	0.0244765	-4.24775	18.9976	0.0526381	2.22681	0.0259598	0.0375725	yes
ENSBTAG00000039812	ENSBTAG00000039812	H4_BOVIN	23:31665561-31667068	q1	q2	OK	28.3005	1.4936	-4.24396	18.9478	0.0527765	23.0031	0	0	yes
ENSBTAG00000017397	ENSBTAG00000017397	A6QNQ0_BOVIN	18:18041276-18392207	q1	q2	NOTEST	0.238553	0.0125973	-4.24312	18.9368	0.0528073	3.29097	0.000998414	1	no
ENSBTAG00000005535	ENSBTAG00000005535	-	18:18468647-18470478	q1	q2	OK	2.00162	0.10573	-4.24272	18.9314	0.0528219	6.38079	1.76175e-10	4.92527e-10	yes
ENSBTAG00000008021	ENSBTAG00000008021	-	7:5668741-5671232	q1	q2	OK	55.6392	2.945	-4.23976	18.8928	0.0529304	18.5421	0	0	yes
ENSBTAG00000021707	ENSBTAG00000021707	Q0VD56_BOVIN	15:78383687-78401416	q1	q2	OK	0.32694	0.0173098	-4.23937	18.8876	0.0529447	3.9499	7.81835e-05	0.000148049	yes
ENSBTAG00000010655	ENSBTAG00000010655	DCST1	3:15603804-15619232	q1	q2	NOTEST	0.259617	0.0137538	-4.23848	18.876	0.0529774	2.63133	0.00850516	1	no
ENSBTAG00000047707	ENSBTAG00000047707	Q5KTP6_BOVIN	23:7054418-7063641	q1	q2	OK	9.4241	0.500247	-4.23564	18.8389	0.0530818	9.13378	0	0	yes
ENSBTAG00000015576	ENSBTAG00000015576	NPAS1	18:54516898-54532816	q1	q2	OK	1.73217	0.0920305	-4.23432	18.8217	0.0531303	6.21017	5.29267e-10	1.43645e-09	yes
ENSBTAG00000038662	ENSBTAG00000038662	CXB6_BOVIN	12:36310778-36318420	q1	q2	OK	0.838485	0.044562	-4.2339	18.8161	0.0531458	3.42398	0.000617105	0.00107175	yes
ENSBTAG00000017677	ENSBTAG00000017677	A6QLI2_BOVIN	10:58748956-58787385	q1	q2	NOTEST	0.27651	0.0146962	-4.23382	18.8151	0.0531488	2.07102	0.0383569	1	no
ENSBTAG00000015405	ENSBTAG00000015405	DCHS1	15:47042651-47064122	q1	q2	NOTEST	0.105625	0.00561662	-4.2331	18.8058	0.0531753	2.73859	0.0061704	1	no
ENSBTAG00000000032	ENSBTAG00000000032	A4FUD5_BOVIN	19:37985584-37994816	q1	q2	OK	0.701106	0.0373023	-4.23229	18.7952	0.0532052	3.12791	0.00176054	0.00291773	yes
ENSBTAG00000030523	ENSBTAG00000030523	Q0VCG8_BOVIN	19:40868078-40877769	q1	q2	OK	0.793586	0.0424053	-4.22607	18.7143	0.053435	4.12015	3.7863e-05	7.36084e-05	yes
ENSBTAG00000032761	ENSBTAG00000032761	CALHM3	26:24303868-24309613	q1	q2	OK	1.6294	0.0871175	-4.22524	18.7035	0.0534658	4.16758	3.07849e-05	6.02731e-05	yes
ENSBTAG00000004547	ENSBTAG00000004547	A1L4Z7_BOVIN	5:100244331-100255640	q1	q2	OK	0.320787	0.0171637	-4.22418	18.6899	0.0535051	2.85176	0.00434772	0.00690508	yes
ENSBTAG00000039011	ENSBTAG00000039011	HTR3D	1:83718072-83721672	q1	q2	OK	0.520394	0.0278827	-4.22216	18.6637	0.0535801	2.84986	0.00437378	0.00694375	yes
ENSBTAG00000022142	ENSBTAG00000022142	SCGB1C1	11:107148107-107149594	q1	q2	OK	4.57069	0.245328	-4.21963	18.6309	0.0536741	3.70962	0.000207572	0.000376537	yes
ENSBTAG00000015043	ENSBTAG00000015043	Q1LZD7_BOVIN	5:76266276-76282792	q1	q2	OK	0.554476	0.0297804	-4.21869	18.6188	0.0537091	2.72854	0.00636152	0.00991845	yes
ENSBTAG00000020510	ENSBTAG00000020510	EPHA10	3:108737031-108777675	q1	q2	NOTEST	0.177824	0.00956071	-4.21719	18.5995	0.053765	2.69251	0.00709157	1	no
ENSBTAG00000014555	ENSBTAG00000014555	CASS4	13:60037044-60071071	q1	q2	OK	1.02506	0.0552364	-4.21394	18.5577	0.0538862	5.79507	6.82941e-09	1.73162e-08	yes
ENSBTAG00000009030	ENSBTAG00000009030	A7E3L4_BOVIN	10:15835506-15867515	q1	q2	OK	0.959118	0.051797	-4.21077	18.5169	0.0540047	5.29514	1.18925e-07	2.7853e-07	yes
ENSBTAG00000032656	ENSBTAG00000032656	A6QP30_BOVIN	1:73792743-73802039	q1	q2	OK	0.779485	0.0421603	-4.20856	18.4886	0.0540875	3.82916	0.00012858	0.000237698	yes
ENSBTAG00000004952	ENSBTAG00000004952	MFSD4	16:3168634-3193846	q1	q2	OK	6.47985	0.350747	-4.20746	18.4744	0.0541288	12.1728	0	0	yes
ENSBTAG00000002853	ENSBTAG00000002853	A6QQD7_BOVIN	18:56107441-56111943	q1	q2	OK	0.666234	0.036108	-4.20564	18.4511	0.0541971	4.92717	8.34274e-07	1.84502e-06	yes
ENSBTAG00000026880	ENSBTAG00000026880	A6QP32_BOVIN	5:27711063-27729751	q1	q2	NOTEST	0.0499941	0.00271343	-4.20357	18.4247	0.0542749	0.547088	0.584319	1	no
ENSBTAG00000020267	ENSBTAG00000020267	F1MKX1_BOVIN	7:3070477-3074600	q1	q2	OK	0.760852	0.041379	-4.20065	18.3874	0.0543849	2.79376	0.00520997	0.00819847	yes
ENSBTAG00000001585	ENSBTAG00000001585	WIPF1	2:22253661-22294719	q1	q2	NOTEST	0.261447	0.0142583	-4.19664	18.3365	0.0545363	3.68741	0.000226552	1	no
ENSBTAG00000014313	ENSBTAG00000014313	PYROXD2	26:19334010-19359393	q1	q2	OK	0.400445	0.0218818	-4.1938	18.3004	0.0546437	2.75415	0.00588453	0.00920831	yes
ENSBTAG00000015412	ENSBTAG00000015412	F1MJA2_BOVIN	21:55553634-55579813	q1	q2	OK	0.701166	0.0383706	-4.19168	18.2735	0.0547241	3.78341	0.000154697	0.000284202	yes
ENSBTAG00000046209	ENSBTAG00000046209	-	17:20132500-20132665	q1	q2	OK	69.9653	3.84734	-4.18471	18.1854	0.0549891	3.24385	0.00117926	0.00198944	yes
ENSBTAG00000026531	ENSBTAG00000026531	CD163L1	5:103375407-103439148	q1	q2	NOTEST	0.194611	0.0107234	-4.18176	18.1483	0.0551017	2.41575	0.0157028	1	no
ENSBTAG00000008945	ENSBTAG00000008945	A5PKH5_BOVIN	17:63278103-63289816	q1	q2	OK	11.3426	0.626053	-4.17932	18.1176	0.0551949	13.0671	0	0	yes
ENSBTAG00000009835	ENSBTAG00000009835	CACNA1G	19:36731339-36792932	q1	q2	OK	5.80495	0.320773	-4.17766	18.0968	0.0552585	25.1397	0	0	yes
ENSBTAG00000046409	ENSBTAG00000046409	A5D9C8_BOVIN	28:19012869-19015927	q1	q2	OK	0.892842	0.0493578	-4.17706	18.0892	0.0552815	4.30336	1.68226e-05	3.37323e-05	yes
ENSBTAG00000011149	ENSBTAG00000011149	A2VDZ6_BOVIN	29:51265566-51271520	q1	q2	OK	2.7902	0.154355	-4.17604	18.0765	0.0553206	7.72427	1.13243e-14	3.89726e-14	yes
ENSBTAG00000002880	ENSBTAG00000002880	Q0VCF1_BOVIN	26:16721038-16919269	q1	q2	OK	7.13107	0.394531	-4.17591	18.0748	0.0553256	13.5457	0	0	yes
ENSBTAG00000019081	ENSBTAG00000019081	COL7A1	22:51859651-51889946	q1	q2	OK	1.91265	0.105991	-4.17357	18.0454	0.0554154	15.8601	0	0	yes
ENSBTAG00000014335	ENSBTAG00000014335	F1MJA7_BOVIN	26:23563110-23764458	q1	q2	OK	10.2541	0.568999	-4.17164	18.0213	0.0554896	15.0116	0	0	yes
ENSBTAG00000034945	ENSBTAG00000034945	A2VE28_BOVIN	23:25634654-25643394	q1	q2	OK	1.0153	0.0563468	-4.17143	18.0188	0.0554976	5.09105	3.56089e-07	8.08156e-07	yes
ENSBTAG00000004936	ENSBTAG00000004936	TMIGD2	7:20992766-21001767	q1	q2	OK	1.10214	0.0613652	-4.16675	17.9603	0.055678	3.42381	0.000617489	0.0010723	yes
ENSBTAG00000039163	ENSBTAG00000039163	A7MAZ5_BOVIN	23:31490461-31494121	q1	q2	OK	15.044	0.841028	-4.16089	17.8876	0.0559046	27.057	0	0	yes
ENSBTAG00000005108	ENSBTAG00000005108	SLIT2	6:41236588-41640789	q1	q2	OK	2.1999	0.123045	-4.16019	17.8788	0.0559317	11.9869	0	0	yes
ENSBTAG00000004840	ENSBTAG00000004840	F1MJ12_BOVIN	5:103768065-103779250	q1	q2	OK	6.12323	0.34296	-4.15818	17.8541	0.0560097	15.385	0	0	yes
ENSBTAG00000005434	ENSBTAG00000005434	PLVAP	7:5685230-5704120	q1	q2	OK	1.46987	0.0823321	-4.15809	17.8529	0.0560132	6.00666	1.89387e-09	4.96687e-09	yes
ENSBTAG00000024509	ENSBTAG00000024509	TMEM52	16:52083967-52085908	q1	q2	OK	3.56915	0.199954	-4.15784	17.8499	0.0560229	6.20715	5.39555e-10	1.46389e-09	yes
ENSBTAG00000012035	ENSBTAG00000012035	EXOC3L1	18:34940462-34946013	q1	q2	OK	2.5606	0.143544	-4.15691	17.8384	0.056059	9.35021	0	0	yes
ENSBTAG00000038495	ENSBTAG00000038495	A8E644_BOVIN	12:25362947-25712458	q1	q2	OK	1.08391	0.0608169	-4.15563	17.8225	0.0561088	3.96636	7.2978e-05	0.000138466	yes
ENSBTAG00000015581	ENSBTAG00000015581	Q7M2Q5_BOVIN	13:55019576-55040430	q1	q2	OK	0.331987	0.0186308	-4.15537	17.8193	0.0561189	2.63629	0.00838178	0.0128892	yes
ENSBTAG00000000654	ENSBTAG00000000654	ARMC4	13:36899557-37016058	q1	q2	OK	1.39361	0.0782572	-4.15446	17.8081	0.0561543	7.60344	2.88658e-14	9.71831e-14	yes
ENSBTAG00000026236	ENSBTAG00000026236	ZA2G_BOVIN	25:36982286-36986566	q1	q2	OK	4.97206	0.279529	-4.15277	17.7873	0.0562201	8.47555	0	0	yes
ENSBTAG00000047713	ENSBTAG00000047713	C11orf35	29:51036146-51115452	q1	q2	OK	1.07383	0.0604278	-4.1514	17.7705	0.0562735	5.05879	4.21914e-07	9.5197e-07	yes
ENSBTAG00000014455	ENSBTAG00000014455	PDZD2	20:41563222-41662806	q1	q2	OK	1.46453	0.0825113	-4.1497	17.7494	0.0563399	12.9156	0	0	yes
ENSBTAG00000011545	ENSBTAG00000011545	GDA	8:48658280-48782109	q1	q2	OK	4.28677	0.242284	-4.14512	17.6932	0.056519	10.5855	0	0	yes
ENSBTAG00000000033	ENSBTAG00000000033	PHOSPHO1	19:37978509-37985160	q1	q2	OK	13.6655	0.772453	-4.14494	17.691	0.0565261	19.3214	0	0	yes
ENSBTAG00000046440	ENSBTAG00000046440	TRAM1L1	6:9455205-9456342	q1	q2	OK	0.5478	0.0310166	-4.14254	17.6615	0.0566202	2.79164	0.00524422	0.00824848	yes
ENSBTAG00000038494	ENSBTAG00000038494	-	21:20357102-20358125	q1	q2	OK	0.830997	0.0470896	-4.14136	17.6471	0.0566665	2.66093	0.00779259	0.0120458	yes
ENSBTAG00000011139	ENSBTAG00000011139	CHLE_BOVIN	1:102337856-102409795	q1	q2	OK	0.487623	0.0276906	-4.1383	17.6097	0.0567868	2.88277	0.00394194	0.00628577	yes
ENSBTAG00000013205	ENSBTAG00000013205	Q0VC51_BOVIN	1:77198181-77343645	q1	q2	OK	9.88824	0.56325	-4.13387	17.5557	0.0569615	15.6658	0	0	yes
ENSBTAG00000011481	ENSBTAG00000011481	IL12RB1	7:5050174-5068855	q1	q2	OK	0.627865	0.0358484	-4.13047	17.5144	0.0570959	3.78718	0.000152369	0.000280147	yes
ENSBTAG00000038947	ENSBTAG00000038947	ZSCAN4	18:65278552-65280012	q1	q2	OK	0.648576	0.0370591	-4.12938	17.5011	0.057139	2.65222	0.00799647	0.0123387	yes
ENSBTAG00000025071	ENSBTAG00000025071	ODZ2	7:82387327-82589268	q1	q2	NOTEST	0.190237	0.0108775	-4.12839	17.489	0.0571782	4.0264	5.66367e-05	1	no
ENSBTAG00000016704	ENSBTAG00000016704	SPX2_BOVIN	29:28865146-28892893	q1	q2	OK	1.88917	0.108212	-4.12582	17.458	0.0572802	8.48883	0	0	yes
ENSBTAG00000019134	ENSBTAG00000019134	NEK5	12:21512687-21561888	q1	q2	OK	1.05171	0.0603159	-4.12406	17.4367	0.0573501	4.66132	3.14182e-06	6.65942e-06	yes
ENSBTAG00000019716	ENSBTAG00000019716	IL8_BOVIN	6:90559881-90563647	q1	q2	OK	3.1707	0.182276	-4.1206	17.395	0.0574878	7.48245	7.30527e-14	2.4101e-13	yes
ENSBTAG00000015093	ENSBTAG00000015093	ADAMTS13	11:104373527-104407288	q1	q2	OK	0.42785	0.0246237	-4.11898	17.3755	0.0575524	4.81068	1.50415e-06	3.26696e-06	yes
ENSBTAG00000010963	ENSBTAG00000010963	IL16_BOVIN	21:27527683-27606711	q1	q2	NOTEST	0.112378	0.00646955	-4.11855	17.3703	0.0575696	2.54941	0.0107904	1	no
ENSBTAG00000016541	ENSBTAG00000016541	CAMK1G	16:75611799-75642910	q1	q2	OK	1.21461	0.0699884	-4.11723	17.3544	0.0576223	5.96527	2.4423e-09	6.36006e-09	yes
ENSBTAG00000015520	ENSBTAG00000015520	SLC11A1	2:107114928-107125867	q1	q2	OK	0.382665	0.0220737	-4.11568	17.3358	0.0576842	3.12844	0.00175736	0.00291334	yes
ENSBTAG00000009831	ENSBTAG00000009831	OCA2	2:347041-598104	q1	q2	NOTEST	0.204117	0.0117904	-4.11371	17.3121	0.057763	2.42506	0.0153057	1	no
ENSBTAG00000047379	ENSBTAG00000047379	CYP3A4	25:37125928-37175162	q1	q2	OK	11.2216	0.648213	-4.11366	17.3116	0.057765	15.7891	0	0	yes
ENSBTAG00000006676	ENSBTAG00000006676	FIBIN_BOVIN	15:58477426-58481142	q1	q2	OK	0.345779	0.0199961	-4.11206	17.2923	0.0578291	3.42853	0.000606851	0.00105507	yes
ENSBTAG00000021310	ENSBTAG00000021310	COL4A4	2:115971117-116104632	q1	q2	NOTEST	0.103612	0.00599766	-4.11065	17.2754	0.0578857	2.77136	0.00558221	1	no
ENSBTAG00000015197	ENSBTAG00000015197	KLHDC8A	16:2930873-2936327	q1	q2	OK	0.575357	0.0334515	-4.10431	17.1997	0.0581406	2.76647	0.00566669	0.00888366	yes
ENSBTAG00000004498	ENSBTAG00000004498	ESR2_BOVIN	10:76707921-76757370	q1	q2	OK	0.410485	0.023879	-4.10352	17.1902	0.0581725	2.29818	0.0215517	0.0314979	yes
ENSBTAG00000000735	ENSBTAG00000000735	B2LA1_BOVIN	21:26481214-26490869	q1	q2	OK	9.76284	0.568739	-4.10146	17.1658	0.0582556	9.91763	0	0	yes
ENSBTAG00000011525	ENSBTAG00000011525	C8KIL7_BOVIN	5:65387536-65453818	q1	q2	OK	0.9301	0.0542188	-4.10052	17.1546	0.0582935	5.32534	1.00765e-07	2.37194e-07	yes
ENSBTAG00000003956	ENSBTAG00000003956	A4FV66_BOVIN	19:37113476-37122446	q1	q2	OK	0.950252	0.0555563	-4.09629	17.1043	0.0584647	3.20941	0.00133006	0.00223134	yes
ENSBTAG00000005990	ENSBTAG00000005990	S1PR1_BOVIN	3:42184096-42188752	q1	q2	NOTEST	0.241508	0.0141268	-4.09557	17.0957	0.0584939	2.72007	0.0065268	1	no
ENSBTAG00000002629	ENSBTAG00000002629	C19orf45	7:17590553-17596556	q1	q2	OK	0.34186	0.0199969	-4.09556	17.0956	0.0584943	2.53349	0.0112933	0.0170966	yes
ENSBTAG00000016649	ENSBTAG00000016649	CCND2_BOVIN	5:106253906-106276819	q1	q2	OK	7.87045	0.460771	-4.09433	17.081	0.0585442	9.36879	0	0	yes
ENSBTAG00000020198	ENSBTAG00000020198	METRN	25:613233-615345	q1	q2	OK	19.5234	1.14313	-4.09414	17.0789	0.0585519	15.1438	0	0	yes
ENSBTAG00000001864	ENSBTAG00000001864	NR4A3	8:65341201-65373695	q1	q2	OK	0.812919	0.0476197	-4.09348	17.0711	0.0585787	4.65241	3.28078e-06	6.9422e-06	yes
ENSBTAG00000040432	ENSBTAG00000040432	CLD3_BOVIN	25:34018455-34019669	q1	q2	OK	16.5011	0.968935	-4.09002	17.0301	0.0587194	15.6439	0	0	yes
ENSBTAG00000030593	ENSBTAG00000030593	RFTN1	1:155176263-155184715	q1	q2	OK	1.10763	0.0653241	-4.08371	16.9559	0.0589767	3.10649	0.00189325	0.00312907	yes
ENSBTAG00000007556	ENSBTAG00000007556	DYRK4	5:105946099-105985653	q1	q2	OK	0.94747	0.0560391	-4.07957	16.9073	0.0591462	4.59025	4.42709e-06	9.27135e-06	yes
ENSBTAG00000027900	ENSBTAG00000027900	LRRIQ1	5:14748149-14952308	q1	q2	NOTEST	0.27367	0.0162555	-4.07344	16.8355	0.0593981	3.7849	0.000153769	1	no
ENSBTAG00000004826	ENSBTAG00000004826	ACP5	7:17134690-17137939	q1	q2	OK	9.77966	0.582309	-4.06993	16.7946	0.0595428	11.9144	0	0	yes
ENSBTAG00000015737	ENSBTAG00000015737	KPNA7	25:37664541-37691692	q1	q2	OK	0.901054	0.0536699	-4.06943	16.7888	0.0595634	4.10983	3.95943e-05	7.68732e-05	yes
ENSBTAG00000001979	ENSBTAG00000001979	TAF7L	X:55127018-55144665	q1	q2	OK	0.485326	0.0289408	-4.06778	16.7696	0.0596316	2.10246	0.0355128	0.0504516	no
ENSBTAG00000019612	ENSBTAG00000019612	Q58DP6_BOVIN	10:26423873-26445634	q1	q2	OK	1.95449	0.116637	-4.06669	16.757	0.0596766	5.38682	7.17163e-08	1.70418e-07	yes
ENSBTAG00000006860	ENSBTAG00000006860	VWA2	26:35006214-35047805	q1	q2	NOTEST	0.266294	0.0159623	-4.06028	16.6827	0.0599424	2.66126	0.00778487	1	no
ENSBTAG00000015470	ENSBTAG00000015470	SYPL2	3:34082542-34095369	q1	q2	OK	1.37085	0.0825031	-4.05448	16.6157	0.0601838	4.25496	2.09088e-05	4.15469e-05	yes
ENSBTAG00000045763	ENSBTAG00000045763	-	14:949552-950464	q1	q2	OK	0.695899	0.0420232	-4.04962	16.5599	0.0603869	1.96681	0.0492048	0.0684859	no
ENSBTAG00000007428	ENSBTAG00000007428	CDKL5	X:132075496-132128273	q1	q2	OK	1.25553	0.075849	-4.04902	16.553	0.060412	6.88828	5.64704e-12	1.69902e-11	yes
ENSBTAG00000046793	ENSBTAG00000046793	-	4:106426050-106426877	q1	q2	OK	1.12227	0.068013	-4.04447	16.5008	0.0606029	1.60073	0.109437	0.144447	no
ENSBTAG00000011680	ENSBTAG00000011680	PAPLN	10:85097753-85123914	q1	q2	OK	4.41285	0.26774	-4.04281	16.4818	0.0606726	15.4765	0	0	yes
ENSBTAG00000014169	ENSBTAG00000014169	PCDH19	X:51118207-51246606	q1	q2	OK	1.1297	0.0685747	-4.04212	16.474	0.0607017	7.07663	1.47704e-12	4.58997e-12	yes
ENSBTAG00000010820	ENSBTAG00000010820	F1N4C0_BOVIN	15:56384699-56404335	q1	q2	OK	3.06155	0.185896	-4.04169	16.4692	0.0607198	9.02519	0	0	yes
ENSBTAG00000006894	ENSBTAG00000006894	F1MYR5_BOVIN	19:19758763-19956549	q1	q2	NOTEST	0.129123	0.00785768	-4.0385	16.4327	0.0608542	1.98555	0.0470834	1	no
ENSBTAG00000013239	ENSBTAG00000013239	CAPN12	18:48743598-48755715	q1	q2	NOTEST	0.219924	0.0133965	-4.03708	16.4165	0.0609141	2.49601	0.0125599	1	no
ENSBTAG00000031252	ENSBTAG00000031252	A5D7E6_BOVIN	15:75507139-75567303	q1	q2	OK	15.113	0.921316	-4.03595	16.4037	0.0609618	18.5419	0	0	yes
ENSBTAG00000014828	ENSBTAG00000014828	Q95NB9_BOVIN	7:13249308-13506224	q1	q2	NOTEST	0.168828	0.0102953	-4.03549	16.3986	0.0609813	4.1085	3.98239e-05	1	no
ENSBTAG00000014517	ENSBTAG00000014517	F1N4S9_BOVIN	6:60173833-60206257	q1	q2	OK	0.545464	0.0332953	-4.03409	16.3826	0.0610405	4.62164	3.80722e-06	8.01231e-06	yes
ENSBTAG00000040253	ENSBTAG00000040253	F1MGA6_BOVIN	7:73611116-73672127	q1	q2	OK	0.625115	0.0382091	-4.03214	16.3604	0.061123	3.21058	0.00132469	0.00222281	yes
ENSBTAG00000016766	ENSBTAG00000016766	A6H741_BOVIN	4:114199461-114207377	q1	q2	OK	3.78802	0.231559	-4.03199	16.3588	0.0611294	7.2802	3.33289e-13	1.06815e-12	yes
ENSBTAG00000009294	ENSBTAG00000009294	DEGS2_BOVIN	21:66740465-66760017	q1	q2	OK	6.58776	0.402879	-4.03137	16.3517	0.0611557	10.6175	0	0	yes
ENSBTAG00000015700	ENSBTAG00000015700	ELOVL3	26:22742694-22745622	q1	q2	OK	2.46783	0.151279	-4.02796	16.3131	0.0613004	5.5244	3.30616e-08	8.04076e-08	yes
ENSBTAG00000003440	ENSBTAG00000003440	FRRS1_BOVIN	3:43651195-43676797	q1	q2	OK	5.23119	0.321284	-4.02522	16.2821	0.0614169	9.80617	0	0	yes
ENSBTAG00000018064	ENSBTAG00000018064	Q32LA0_BOVIN	4:72499937-72515923	q1	q2	OK	2.06178	0.127188	-4.01885	16.2105	0.0616887	4.34181	1.41313e-05	2.84974e-05	yes
ENSBTAG00000017709	ENSBTAG00000017709	ATRNL1	26:35862686-36163723	q1	q2	OK	2.06679	0.127618	-4.01748	16.1951	0.0617473	10.2432	0	0	yes
ENSBTAG00000022741	ENSBTAG00000022741	NBP6L_BOVIN	3:20961927-20975445	q1	q2	OK	1.14296	0.0706023	-4.01691	16.1887	0.0617717	4.30588	1.66323e-05	3.3363e-05	yes
ENSBTAG00000002390	ENSBTAG00000002390	CL068_BOVIN	5:32277007-32278883	q1	q2	OK	2.59422	0.160577	-4.01397	16.1556	0.0618977	7.93828	1.9984e-15	7.11378e-15	yes
ENSBTAG00000005433	ENSBTAG00000005433	C3orf32	22:17894491-17915430	q1	q2	OK	5.41924	0.335665	-4.013	16.1448	0.0619393	8.73802	0	0	yes
ENSBTAG00000026885	ENSBTAG00000026885	ABCB11	2:27176813-27258734	q1	q2	NOTEST	0.276695	0.0171512	-4.01192	16.1327	0.0619857	3.52155	0.000429039	1	no
ENSBTAG00000005343	ENSBTAG00000005343	TPH1	15:34990950-35011243	q1	q2	OK	1.26357	0.0783404	-4.01161	16.1292	0.0619991	4.34154	1.41485e-05	2.85269e-05	yes
ENSBTAG00000032152	ENSBTAG00000032152	F1MWW8_BOVIN	5:75870207-75903553	q1	q2	OK	0.897532	0.0558203	-4.0071	16.079	0.0621932	5.67313	1.40211e-08	3.48822e-08	yes
ENSBTAG00000010314	ENSBTAG00000010314	ICAM4	7:16051850-16052907	q1	q2	OK	0.776366	0.0484379	-4.00253	16.0281	0.0623905	2.69117	0.00712014	0.0110557	yes
ENSBTAG00000047609	ENSBTAG00000047609	A4FUX1_BOVIN	24:43231406-43232698	q1	q2	OK	8.92227	0.558136	-3.99872	15.9858	0.0625555	6.81589	9.36806e-12	2.79325e-11	yes
ENSBTAG00000013118	ENSBTAG00000013118	Q1JPC5_BOVIN	1:67144110-67210848	q1	q2	NOTEST	0.156816	0.00982003	-3.9972	15.969	0.0626214	2.46764	0.0136005	1	no
ENSBTAG00000010852	ENSBTAG00000010852	-	23:31343550-31373121	q1	q2	OK	0.498084	0.0313218	-3.99115	15.9022	0.0628846	2.68243	0.007309	0.0113316	yes
ENSBTAG00000010411	ENSBTAG00000010411	ADAMTS8	29:37098497-37116122	q1	q2	OK	0.420369	0.0264875	-3.98827	15.8705	0.0630102	3.60008	0.000318114	0.000567319	yes
ENSBTAG00000015326	ENSBTAG00000015326	DFNA5	4:71540349-71614456	q1	q2	OK	3.55311	0.223963	-3.98775	15.8647	0.063033	9.82047	0	0	yes
ENSBTAG00000040014	ENSBTAG00000040014	-	25:39070439-39075699	q1	q2	OK	1.27283	0.0802632	-3.98716	15.8582	0.0630587	2.55739	0.0105462	0.0160236	yes
ENSBTAG00000015829	ENSBTAG00000015829	ENPP5	23:19388893-19395134	q1	q2	OK	19.9591	1.26538	-3.9794	15.7732	0.0633988	16.7622	0	0	yes
ENSBTAG00000006560	ENSBTAG00000006560	VANGL2	3:9385091-9409694	q1	q2	OK	0.336547	0.02136	-3.97783	15.7559	0.0634679	2.55092	0.010744	0.016312	yes
ENSBTAG00000026319	ENSBTAG00000026319	ASPH1_BOVIN	25:26614814-26618147	q1	q2	OK	2.01851	0.128148	-3.97741	15.7514	0.0634863	4.66367	3.10626e-06	6.5913e-06	yes
ENSBTAG00000048163	ENSBTAG00000048163	-	X:93468214-93468595	q1	q2	NOTEST	0.245851	0.0156087	-3.97736	15.7509	0.0634885	0.264506	0.79139	1	no
ENSBTAG00000009055	ENSBTAG00000009055	RNF144B	23:38952209-39043167	q1	q2	OK	6.96613	0.44628	-3.96434	15.6093	0.0640641	21.4886	0	0	yes
ENSBTAG00000011621	ENSBTAG00000011621	IZUMO1	18:55824921-55827887	q1	q2	OK	2.22912	0.143031	-3.96207	15.5849	0.064165	5.16898	2.35372e-07	5.40442e-07	yes
ENSBTAG00000033423	ENSBTAG00000033423	F1N163_BOVIN	3:15567317-15576042	q1	q2	OK	18.2155	1.17113	-3.95919	15.5538	0.0642932	20.571	0	0	yes
ENSBTAG00000005471	ENSBTAG00000005471	RHCG_BOVIN	21:21358094-21383111	q1	q2	OK	0.639481	0.0411899	-3.95654	15.5252	0.0644114	3.6959	0.000219106	0.000396796	yes
ENSBTAG00000020046	ENSBTAG00000020046	A5D7I8_BOVIN	15:34226368-34332243	q1	q2	OK	0.328263	0.021152	-3.95599	15.5192	0.064436	2.62161	0.00875146	0.013412	yes
ENSBTAG00000006234	ENSBTAG00000006234	E1BN71_BOVIN	3:16747640-16761172	q1	q2	OK	1.16321	0.0749651	-3.95575	15.5167	0.0644467	7.88495	3.10862e-15	1.09627e-14	yes
ENSBTAG00000012467	ENSBTAG00000012467	F1MVS9_BOVIN	1:80596923-80649363	q1	q2	OK	0.450692	0.0290683	-3.95462	15.5046	0.0644972	4.81944	1.43963e-06	3.12976e-06	yes
ENSBTAG00000010119	ENSBTAG00000010119	ALDH1A2	10:52336848-52401980	q1	q2	OK	0.836383	0.0539571	-3.95428	15.5009	0.0645124	4.0329	5.50925e-05	0.000105565	yes
ENSBTAG00000047254	ENSBTAG00000047254	ABCA2	11:106209226-106222883	q1	q2	OK	26.5733	1.71588	-3.95296	15.4867	0.0645714	40.3445	0	0	yes
ENSBTAG00000009393	ENSBTAG00000009393	GALA_BOVIN	29:46759817-46765617	q1	q2	OK	1.27187	0.0821408	-3.95271	15.484	0.0645826	2.53314	0.0113046	0.0171121	yes
ENSBTAG00000021097	ENSBTAG00000021097	PELI3	29:45153623-45162953	q1	q2	OK	3.21481	0.207772	-3.95166	15.4728	0.0646297	7.91472	2.44249e-15	8.65485e-15	yes
ENSBTAG00000015214	ENSBTAG00000015214	CAH3_BOVIN	14:79406493-79416487	q1	q2	NOTEST	0.275237	0.017913	-3.94159	15.3652	0.0650823	2.43251	0.0149947	1	no
ENSBTAG00000000568	ENSBTAG00000000568	CCDC154	25:1126768-1133966	q1	q2	NOTEST	0.220317	0.0143621	-3.93924	15.3402	0.0651884	2.43094	0.0150598	1	no
ENSBTAG00000005141	ENSBTAG00000005141	PELI2	10:68778346-68974093	q1	q2	OK	0.628436	0.0409749	-3.93895	15.3371	0.0652015	2.47282	0.0134051	0.0200897	yes
ENSBTAG00000045829	ENSBTAG00000045829	Q7M3H9_BOVIN	7:44968577-44971470	q1	q2	OK	0.70626	0.0460612	-3.93857	15.3331	0.0652187	2.50152	0.0123663	0.0186083	yes
ENSBTAG00000030162	ENSBTAG00000030162	AXIN2	19:62834849-62860774	q1	q2	OK	4.19896	0.273885	-3.93839	15.3311	0.0652269	14.9881	0	0	yes
ENSBTAG00000014806	ENSBTAG00000014806	ATP2A3	19:25163840-25198117	q1	q2	OK	30.1127	1.96512	-3.93768	15.3236	0.065259	37.2509	0	0	yes
ENSBTAG00000021728	ENSBTAG00000021728	OGDHL	28:44224197-44251162	q1	q2	OK	1.49038	0.0973391	-3.93651	15.3112	0.0653119	8.94407	0	0	yes
ENSBTAG00000018509	ENSBTAG00000018509	ETNK2	16:1734649-1749646	q1	q2	OK	16.7223	1.09355	-3.93468	15.2918	0.0653948	14.1446	0	0	yes
ENSBTAG00000047648	ENSBTAG00000047648	SYT2	16:71149230-71153633	q1	q2	OK	6.80423	0.446187	-3.93071	15.2497	0.065575	10.3504	0	0	yes
ENSBTAG00000030913	ENSBTAG00000030913	MX1_BOVIN	1:143176082-143204865	q1	q2	OK	80.6824	5.29247	-3.93024	15.2448	0.0655964	46.4547	0	0	yes
ENSBTAG00000005313	ENSBTAG00000005313	EPHB3	1:83202438-83244544	q1	q2	OK	4.34844	0.286043	-3.92619	15.2021	0.0657808	13.8228	0	0	yes
ENSBTAG00000006191	ENSBTAG00000006191	Q08DM0_BOVIN	21:59708511-59723931	q1	q2	OK	0.958841	0.0631017	-3.92554	15.1952	0.0658104	3.40738	0.000655891	0.00113692	yes
ENSBTAG00000004347	ENSBTAG00000004347	GPR116	23:20052362-20128180	q1	q2	NOTEST	0.175645	0.011567	-3.92458	15.185	0.0658542	3.25649	0.00112799	1	no
ENSBTAG00000039160	ENSBTAG00000039160	VAV1	7:18866560-18937070	q1	q2	OK	3.02264	0.199083	-3.92437	15.1828	0.0658638	9.95126	0	0	yes
ENSBTAG00000005450	ENSBTAG00000005450	Q3T047_BOVIN	25:37189785-37242576	q1	q2	OK	1.46408	0.096479	-3.92363	15.1751	0.0658976	5.51481	3.4915e-08	8.4801e-08	yes
ENSBTAG00000007306	ENSBTAG00000007306	RAB3C_BOVIN	20:20448539-20741101	q1	q2	OK	4.44552	0.293083	-3.92297	15.1681	0.0659278	5.1951	2.04605e-07	4.71929e-07	yes
ENSBTAG00000047913	ENSBTAG00000047913	-	2:66272513-66272580	q1	q2	OK	79.4022	5.24067	-3.92136	15.1512	0.0660014	0.193807	0.846327	0.879074	no
ENSBTAG00000006081	ENSBTAG00000006081	PPM1J	3:30761232-30766807	q1	q2	OK	15.26	1.00797	-3.92024	15.1393	0.0660526	17.6174	0	0	yes
ENSBTAG00000006010	ENSBTAG00000006010	STAB2	5:67612446-67784730	q1	q2	NOTEST	0.113207	0.00748033	-3.91972	15.134	0.0660765	3.11673	0.00182869	1	no
ENSBTAG00000020485	ENSBTAG00000020485	ARRB1_BOVIN	15:55255744-55329451	q1	q2	OK	18.6361	1.23189	-3.91915	15.1281	0.0661026	21.8118	0	0	yes
ENSBTAG00000001917	ENSBTAG00000001917	Q58DB9_BOVIN	15:44250290-44267703	q1	q2	OK	4.77258	0.317095	-3.91178	15.0509	0.0664411	11.4295	0	0	yes
ENSBTAG00000011245	ENSBTAG00000011245	PLXNC1	5:24072281-24224562	q1	q2	OK	2.47575	0.164505	-3.91166	15.0497	0.0664466	13.3101	0	0	yes
ENSBTAG00000038132	ENSBTAG00000038132	Q2KJ59_BOVIN	17:74307985-74318794	q1	q2	OK	2.86769	0.19176	-3.90252	14.9546	0.0668689	9.0173	0	0	yes
ENSBTAG00000018164	ENSBTAG00000018164	FNDC4	11:72181229-72183230	q1	q2	OK	5.29652	0.354274	-3.90211	14.9503	0.0668879	8.15444	4.44089e-16	1.61874e-15	yes
ENSBTAG00000016179	ENSBTAG00000016179	CIB3	7:7873254-7883711	q1	q2	OK	2.75189	0.18525	-3.89288	14.855	0.0673172	3.96165	7.44338e-05	0.000141179	yes
ENSBTAG00000007423	ENSBTAG00000007423	TR11B_BOVIN	14:47432902-47461083	q1	q2	OK	3.87532	0.261295	-3.89056	14.8312	0.0674256	10.9553	0	0	yes
ENSBTAG00000018771	ENSBTAG00000018771	DNAAF1	18:10451368-10472288	q1	q2	OK	1.23301	0.0831794	-3.88982	14.8235	0.0674602	5.94297	2.7991e-09	7.27061e-09	yes
ENSBTAG00000019822	ENSBTAG00000019822	TPPP3_BOVIN	18:35121242-35124820	q1	q2	OK	42.5704	2.88116	-3.88513	14.7754	0.0676798	23.0352	0	0	yes
ENSBTAG00000024291	ENSBTAG00000024291	FAM71F2	4:93475458-93486895	q1	q2	OK	0.921974	0.0624194	-3.88466	14.7706	0.0677019	3.10779	0.00188491	0.00311624	yes
ENSBTAG00000007193	ENSBTAG00000007193	CCL16	19:14782700-14786690	q1	q2	OK	0.758317	0.0513569	-3.88417	14.7656	0.0677249	2.60319	0.00923615	0.0141083	yes
ENSBTAG00000000905	ENSBTAG00000000905	RAB6B_BOVIN	1:136573248-136630809	q1	q2	OK	5.53201	0.375066	-3.88259	14.7494	0.0677991	17.4448	0	0	yes
ENSBTAG00000048092	ENSBTAG00000048092	-	X:123706887-123707919	q1	q2	OK	0.467673	0.0317171	-3.88217	14.7451	0.0678188	2.3949	0.0166248	0.0246269	yes
ENSBTAG00000021333	ENSBTAG00000021333	F1MZL4_BOVIN	16:1752890-1762733	q1	q2	OK	0.708111	0.0480686	-3.88081	14.7313	0.0678828	3.20473	0.00135189	0.00226541	yes
ENSBTAG00000012855	ENSBTAG00000012855	LIPL_BOVIN	8:67481088-67511227	q1	q2	NOTEST	0.168641	0.0114602	-3.87925	14.7154	0.0679562	2.48302	0.0130274	1	no
ENSBTAG00000009891	ENSBTAG00000009891	PPP4R4	21:59397852-59491932	q1	q2	OK	0.81623	0.0555868	-3.87616	14.6839	0.068102	5.61448	1.97152e-08	4.85508e-08	yes
ENSBTAG00000020402	ENSBTAG00000020402	TDRD9	21:70123916-70233306	q1	q2	NOTEST	0.179778	0.0122655	-3.87354	14.6572	0.0682257	2.61572	0.00890408	1	no
ENSBTAG00000003449	ENSBTAG00000003449	-	4:93655276-93685724	q1	q2	OK	3.05745	0.208778	-3.87229	14.6445	0.0682849	14.5667	0	0	yes
ENSBTAG00000000672	ENSBTAG00000000672	A6QLS5_BOVIN	20:58634393-58664249	q1	q2	OK	8.43097	0.575859	-3.87191	14.6407	0.0683029	17.8229	0	0	yes
ENSBTAG00000002878	ENSBTAG00000002878	CHRD	1:83416531-83425904	q1	q2	OK	5.49506	0.375561	-3.87102	14.6316	0.068345	15.9308	0	0	yes
ENSBTAG00000014355	ENSBTAG00000014355	MYCBPAP	19:36822722-36845371	q1	q2	OK	10.7572	0.73521	-3.871	14.6315	0.068346	21.411	0	0	yes
ENSBTAG00000019473	ENSBTAG00000019473	IGLON5	18:57762990-57777429	q1	q2	OK	0.528264	0.0361046	-3.871	14.6315	0.068346	2.00075	0.045419	0.0635319	no
ENSBTAG00000039337	ENSBTAG00000039337	-	7:8389984-8399577	q1	q2	OK	1.00848	0.0689897	-3.86966	14.6178	0.0684095	3.73358	0.000188777	0.0003439	yes
ENSBTAG00000047445	ENSBTAG00000047445	-	2:66272622-66272679	q1	q2	OK	172.739	11.8942	-3.86027	14.523	0.0688562	0.179959	0.857185	0.888179	no
ENSBTAG00000004541	ENSBTAG00000004541	LPAR5_BOVIN	5:104163581-104173568	q1	q2	OK	0.448318	0.0308732	-3.8601	14.5213	0.0688643	2.66608	0.00767411	0.0118683	yes
ENSBTAG00000034609	ENSBTAG00000034609	LOC509513	4:106853029-106923607	q1	q2	NOTEST	0.0365866	0.0025214	-3.85902	14.5104	0.0689159	0.115956	0.907688	1	no
ENSBTAG00000015757	ENSBTAG00000015757	PHYIP_BOVIN	8:70033837-70046045	q1	q2	NOTEST	0.249489	0.0172405	-3.8551	14.4711	0.0691034	2.438	0.014769	1	no
ENSBTAG00000006846	ENSBTAG00000006846	Q5E9E0_BOVIN	19:19738611-19757359	q1	q2	OK	8.71101	0.602857	-3.85295	14.4495	0.0692064	13.6733	0	0	yes
ENSBTAG00000020936	ENSBTAG00000020936	NOD2_BOVIN	18:19181971-19212607	q1	q2	OK	1.14362	0.0798672	-3.83986	14.319	0.0698372	9.28995	0	0	yes
ENSBTAG00000024406	ENSBTAG00000024406	AGR2	4:25258618-25271426	q1	q2	OK	0.700118	0.0489364	-3.83862	14.3067	0.0698973	1.97222	0.0485848	0.0676867	no
ENSBTAG00000035868	ENSBTAG00000035868	-	18:57971423-57975412	q1	q2	OK	0.362245	0.0253732	-3.83559	14.2767	0.0700442	2.4543	0.0141158	0.0210637	yes
ENSBTAG00000003711	ENSBTAG00000003711	A5PJT1_BOVIN	11:28576346-28668899	q1	q2	OK	11.8652	0.831771	-3.83441	14.265	0.0701015	27.7466	0	0	yes
ENSBTAG00000006037	ENSBTAG00000006037	WISP2	13:73833118-73847404	q1	q2	OK	5.37485	0.376806	-3.83433	14.2642	0.0701054	10.2493	0	0	yes
ENSBTAG00000010382	ENSBTAG00000010382	MUC13	1:69935162-69961881	q1	q2	OK	0.597929	0.0419321	-3.83385	14.2595	0.0701288	2.82666	0.00470367	0.00744134	yes
ENSBTAG00000016554	ENSBTAG00000016554	C3orf52	1:57279553-57319747	q1	q2	OK	4.7086	0.330621	-3.83205	14.2417	0.0702163	5.81579	6.03474e-09	1.5354e-08	yes
ENSBTAG00000008583	ENSBTAG00000008583	-	28:26876455-26894874	q1	q2	OK	1.29149	0.0909735	-3.82744	14.1963	0.070441	6.34754	2.18789e-10	6.07901e-10	yes
ENSBTAG00000017540	ENSBTAG00000017540	FAM13C	28:14904832-15136823	q1	q2	NOTEST	0.0699362	0.00492847	-3.82683	14.1902	0.0704708	1.37892	0.167918	1	no
ENSBTAG00000016360	ENSBTAG00000016360	FAM18A	25:9501385-9524548	q1	q2	OK	0.770354	0.054309	-3.82626	14.1846	0.0704987	1.9066	0.0565728	0.0780135	no
ENSBTAG00000004297	ENSBTAG00000004297	ACOXL	11:1205161-1533761	q1	q2	OK	0.338645	0.0239084	-3.82419	14.1643	0.0705999	2.49849	0.0124724	0.0187576	yes
ENSBTAG00000001516	ENSBTAG00000001516	CALCB	15:38336936-38340230	q1	q2	OK	2.95004	0.208453	-3.82294	14.1521	0.0706611	3.50626	0.000454455	0.000799943	yes
ENSBTAG00000010562	ENSBTAG00000010562	CD34	16:77367501-77389361	q1	q2	OK	0.859687	0.060992	-3.81712	14.0951	0.0709467	3.20879	0.00133294	0.00223573	yes
ENSBTAG00000003512	ENSBTAG00000003512	MYH7B	13:64888625-64912758	q1	q2	OK	3.10839	0.22085	-3.81503	14.0747	0.0710496	16.5556	0	0	yes
ENSBTAG00000002299	ENSBTAG00000002299	SEL1L3	6:46791164-46881531	q1	q2	OK	2.82992	0.201254	-3.81368	14.0614	0.0711161	11.5892	0	0	yes
ENSBTAG00000005765	ENSBTAG00000005765	Q3SZ33_BOVIN	5:111293865-111317963	q1	q2	OK	40.1998	2.86514	-3.81051	14.0307	0.0712725	19.4653	0	0	yes
ENSBTAG00000003802	ENSBTAG00000003802	TEKT3	19:33418199-33451244	q1	q2	OK	0.478708	0.034211	-3.80661	13.9928	0.0714655	2.56805	0.0102274	0.015561	yes
ENSBTAG00000015575	ENSBTAG00000015575	Q9BEG7_BOVIN	11:9467060-9646849	q1	q2	OK	0.571484	0.0409098	-3.80419	13.9694	0.0715854	2.63846	0.00832829	0.0128106	yes
ENSBTAG00000017289	ENSBTAG00000017289	MCF2L	12:90438590-90504948	q1	q2	OK	4.87642	0.349895	-3.80083	13.9368	0.0717524	15.7277	0	0	yes
ENSBTAG00000004339	ENSBTAG00000004339	A6QPM2_BOVIN	21:20422126-20429481	q1	q2	OK	0.950763	0.068274	-3.79968	13.9257	0.0718096	5.30455	1.12949e-07	2.64955e-07	yes
ENSBTAG00000038222	ENSBTAG00000038222	-	16:55768188-55770872	q1	q2	NOTEST	0.194454	0.0139804	-3.79795	13.909	0.0718957	1.48867	0.136575	1	no
ENSBTAG00000021978	ENSBTAG00000021978	A6QLQ6_BOVIN	5:115517819-115572329	q1	q2	OK	0.867772	0.0623961	-3.79779	13.9075	0.0719037	2.59651	0.00941764	0.0143802	yes
ENSBTAG00000039803	ENSBTAG00000039803	MYO7B	2:4819956-4901074	q1	q2	NOTEST	0.0572242	0.00413055	-3.79222	13.8539	0.0721819	2.33043	0.0197832	1	no
ENSBTAG00000017875	ENSBTAG00000017875	ARHGAP30	3:8439000-8453973	q1	q2	OK	1.0265	0.0741319	-3.7915	13.8469	0.0722179	7.17495	7.23421e-13	2.28162e-12	yes
ENSBTAG00000032896	ENSBTAG00000032896	-	X:118593431-118594445	q1	q2	OK	1.52294	0.110114	-3.78979	13.8306	0.0723035	3.95808	7.55536e-05	0.000143252	yes
ENSBTAG00000000540	ENSBTAG00000000540	-	19:34668034-34672049	q1	q2	OK	2.31346	0.167506	-3.78777	13.8112	0.0724048	7.51035	5.90639e-14	1.95972e-13	yes
ENSBTAG00000011273	ENSBTAG00000011273	LRRC23	5:103908371-103915853	q1	q2	OK	4.00382	0.290665	-3.78395	13.7747	0.0725968	9.09033	0	0	yes
ENSBTAG00000020992	ENSBTAG00000020992	RHBDL3	19:18160727-18192076	q1	q2	OK	3.2503	0.237503	-3.77456	13.6853	0.0730709	6.92654	4.31277e-12	1.30798e-11	yes
ENSBTAG00000018688	ENSBTAG00000018688	Q0VC97_BOVIN	1:150144148-150153934	q1	q2	OK	1.77316	0.129691	-3.77317	13.6722	0.0731413	4.76838	1.8571e-06	4.00627e-06	yes
ENSBTAG00000019539	ENSBTAG00000019539	MFAP3L	8:1697552-1712467	q1	q2	OK	2.66142	0.194942	-3.77108	13.6524	0.0732473	6.44692	1.14146e-10	3.22608e-10	yes
ENSBTAG00000047166	ENSBTAG00000047166	SH2D7	21:30998213-31006059	q1	q2	OK	3.66896	0.269415	-3.76747	13.6182	0.0734308	8.19284	2.22045e-16	8.1706e-16	yes
ENSBTAG00000013798	ENSBTAG00000013798	PTPRN_BOVIN	2:107958894-107978251	q1	q2	OK	0.811835	0.0596284	-3.76711	13.6149	0.0734492	6.2204	4.9589e-10	1.34812e-09	yes
ENSBTAG00000006359	ENSBTAG00000006359	EPHA1	4:107608324-107623775	q1	q2	OK	3.84407	0.283102	-3.76324	13.5784	0.0736465	13.5604	0	0	yes
ENSBTAG00000006592	ENSBTAG00000006592	SGSM1	17:67284514-67335715	q1	q2	OK	8.56554	0.631642	-3.76136	13.5608	0.0737425	23.7597	0	0	yes
ENSBTAG00000012456	ENSBTAG00000012456	HECA2_BOVIN	4:10372348-10419397	q1	q2	OK	0.481413	0.0355896	-3.75775	13.5268	0.0739272	3.18483	0.00144841	0.00241867	yes
ENSBTAG00000007694	ENSBTAG00000007694	KIF25	9:103936142-103982549	q1	q2	OK	0.5153	0.0381089	-3.75721	13.5218	0.0739549	3.10788	0.00188437	0.00311565	yes
ENSBTAG00000012759	ENSBTAG00000012759	FBXO41	11:11168280-11179097	q1	q2	OK	3.09408	0.229287	-3.75428	13.4944	0.0741053	10.588	0	0	yes
ENSBTAG00000007514	ENSBTAG00000007514	CPNE5	23:10632881-10734550	q1	q2	NOTEST	0.24713	0.0183252	-3.75337	13.4858	0.074152	2.5116	0.0120186	1	no
ENSBTAG00000018248	ENSBTAG00000018248	MGLL	22:60443563-60493810	q1	q2	OK	1.87776	0.13927	-3.75306	13.4829	0.074168	4.20545	2.60568e-05	5.14307e-05	yes
ENSBTAG00000009696	ENSBTAG00000009696	ACTN2	28:9403201-9450916	q1	q2	OK	1.93311	0.143596	-3.75083	13.4621	0.0742827	8.36941	0	0	yes
ENSBTAG00000015128	ENSBTAG00000015128	E1BKC5_BOVIN	18:57431503-57436686	q1	q2	OK	0.628696	0.0467794	-3.74842	13.4396	0.0744069	2.37156	0.0177132	0.0261557	yes
ENSBTAG00000007755	ENSBTAG00000007755	B7T155_BOVIN	5:111073486-111088530	q1	q2	OK	20.324	1.5125	-3.74818	13.4374	0.0744193	15.3935	0	0	yes
ENSBTAG00000015139	ENSBTAG00000015139	-	18:61946020-61951470	q1	q2	OK	0.677072	0.0505364	-3.74391	13.3977	0.0746399	3.74462	0.000180668	0.000329755	yes
ENSBTAG00000043814	ENSBTAG00000043814	5S_rRNA	15:58532711-58609229	q1	q2	OK	11.9187	0.890131	-3.74306	13.3898	0.0746838	0.29749	0.766093	0.812014	no
ENSBTAG00000011224	ENSBTAG00000011224	CITE2_BOVIN	9:78071005-78073397	q1	q2	OK	195.393	14.6259	-3.73979	13.3594	0.0748533	46.8523	0	0	yes
ENSBTAG00000043971	ENSBTAG00000043971	NOTCH3	7:8930802-8970307	q1	q2	OK	7.69439	0.576255	-3.73903	13.3524	0.0748928	27.1448	0	0	yes
ENSBTAG00000025140	ENSBTAG00000025140	DOC2B	19:23044439-23067069	q1	q2	OK	0.589187	0.0441304	-3.73888	13.351	0.0749005	2.38799	0.0169407	0.0250606	yes
ENSBTAG00000017434	ENSBTAG00000017434	HEATR7B1	3:114040650-114090322	q1	q2	NOTEST	0.114305	0.00856921	-3.73758	13.339	0.0749681	2.38706	0.0169838	1	no
ENSBTAG00000007530	ENSBTAG00000007530	TRIM10	23:28613832-28622421	q1	q2	OK	1.15271	0.0864776	-3.73656	13.3296	0.0750211	5.6032	2.10428e-08	5.17262e-08	yes
ENSBTAG00000030994	ENSBTAG00000030994	ANKS1B	5:63230085-63658310	q1	q2	NOTEST	0.0932424	0.00701693	-3.73207	13.2882	0.0752549	0.627687	0.530209	1	no
ENSBTAG00000031362	ENSBTAG00000031362	FAM55B	15:25515541-25524857	q1	q2	OK	1.0636	0.0800491	-3.73193	13.2868	0.0752622	4.30691	1.65549e-05	3.322e-05	yes
ENSBTAG00000011572	ENSBTAG00000011572	E1BAA3_BOVIN	14:69145535-69149006	q1	q2	OK	0.78287	0.0589452	-3.73133	13.2813	0.0752935	1.81553	0.0694429	0.0944246	no
ENSBTAG00000001026	ENSBTAG00000001026	BCMO1	18:7931946-7962732	q1	q2	OK	1.19016	0.0896996	-3.72991	13.2683	0.0753677	5.17059	2.33354e-07	5.36036e-07	yes
ENSBTAG00000044195	ENSBTAG00000044195	SDK2	19:58439766-58579255	q1	q2	NOTEST	0.127755	0.00963797	-3.7285	13.2554	0.0754414	3.12995	0.00174839	1	no
ENSBTAG00000039321	ENSBTAG00000039321	E1BJN3_BOVIN	19:43562850-43571700	q1	q2	OK	0.404602	0.0305574	-3.72691	13.2407	0.0755246	2.61443	0.00893767	0.0136832	yes
ENSBTAG00000047167	ENSBTAG00000047167	-	11:54723189-55906462	q1	q2	OK	1.13125	0.0855283	-3.72537	13.2266	0.0756052	3.66704	0.000245378	0.000442257	yes
ENSBTAG00000017405	ENSBTAG00000017405	F1N7B3_BOVIN	3:18991962-19015891	q1	q2	OK	0.56515	0.0428001	-3.72295	13.2044	0.0757322	3.19804	0.00138363	0.00231549	yes
ENSBTAG00000020620	ENSBTAG00000020620	-	4:58724264-58724900	q1	q2	OK	3.62354	0.274816	-3.72086	13.1853	0.075842	4.62715	3.70727e-06	7.81014e-06	yes
ENSBTAG00000012285	ENSBTAG00000012285	ESRRB	10:88763704-88818475	q1	q2	OK	1.86884	0.141955	-3.71863	13.165	0.0759593	6.38157	1.75282e-10	4.90116e-10	yes
ENSBTAG00000010246	ENSBTAG00000010246	A5PKH1_BOVIN	12:90622563-90639777	q1	q2	OK	4.80125	0.364822	-3.71814	13.1605	0.0759851	7.92022	2.44249e-15	8.65485e-15	yes
ENSBTAG00000008538	ENSBTAG00000008538	DNAI1_BOVIN	8:76990451-77234158	q1	q2	OK	6.5177	0.495457	-3.71753	13.1549	0.0760172	15.3336	0	0	yes
ENSBTAG00000025340	ENSBTAG00000025340	CDHR2	7:39392481-39419245	q1	q2	OK	0.291933	0.0221934	-3.71744	13.154	0.076022	3.75643	0.000172357	0.000315294	yes
ENSBTAG00000037757	ENSBTAG00000037757	EBF4	13:52885988-52942347	q1	q2	OK	0.5859	0.0445529	-3.71706	13.1507	0.076042	3.75217	0.000175308	0.000320331	yes
ENSBTAG00000014523	ENSBTAG00000014523	DIRAS2	8:88673820-88708956	q1	q2	OK	0.46703	0.0355197	-3.71682	13.1485	0.0760546	3.61764	0.000297304	0.000531488	yes
ENSBTAG00000013071	ENSBTAG00000013071	GPR153	16:47942385-47947791	q1	q2	OK	6.93569	0.529845	-3.7104	13.09	0.0763938	13.5461	0	0	yes
ENSBTAG00000000522	ENSBTAG00000000522	FETUA_BOVIN	1:81202131-81209114	q1	q2	OK	0.456395	0.034895	-3.70919	13.0791	0.0764579	2.34074	0.0192454	0.0282822	yes
ENSBTAG00000031669	ENSBTAG00000031669	A6QPC5_BOVIN	11:54723189-55906462	q1	q2	OK	1.82836	0.139968	-3.70737	13.0627	0.0765544	5.61785	1.93353e-08	4.76514e-08	yes
ENSBTAG00000046848	ENSBTAG00000046848	-	26:19219742-19222118	q1	q2	OK	3.20703	0.246103	-3.70391	13.0313	0.0767383	4.44273	8.8825e-06	1.81784e-05	yes
ENSBTAG00000031785	ENSBTAG00000031785	H2B1_BOVIN	23:31589470-31607791	q1	q2	OK	52.3082	4.01752	-3.70266	13.02	0.0768048	22.7411	0	0	yes
ENSBTAG00000017536	ENSBTAG00000017536	MPP3	19:44296164-44337288	q1	q2	OK	1.01019	0.0776544	-3.70142	13.0088	0.0768708	5.16161	2.44834e-07	5.61613e-07	yes
ENSBTAG00000021844	ENSBTAG00000021844	COCH	21:41948038-41961275	q1	q2	OK	0.393163	0.0302262	-3.70125	13.0074	0.0768799	2.84842	0.00439375	0.00697274	yes
ENSBTAG00000004712	ENSBTAG00000004712	F1N6N8_BOVIN	13:60185128-60186103	q1	q2	OK	0.489385	0.0376482	-3.70032	12.9989	0.0769295	1.79885	0.0720418	0.0977543	no
ENSBTAG00000011558	ENSBTAG00000011558	GPAT2	11:2130833-2140973	q1	q2	NOTEST	0.21295	0.0163921	-3.69944	12.991	0.0769764	2.36268	0.0181435	1	no
ENSBTAG00000020141	ENSBTAG00000020141	FREM1	8:29353417-29504029	q1	q2	NOTEST	0.11516	0.00888277	-3.69648	12.9644	0.0771345	2.82185	0.00477481	1	no
ENSBTAG00000035710	ENSBTAG00000035710	ZBBX	1:100877728-101004327	q1	q2	OK	0.314238	0.0243138	-3.69201	12.9243	0.0773739	2.66779	0.0076353	0.0118105	yes
ENSBTAG00000002089	ENSBTAG00000002089	C6orf146	23:49935472-49947452	q1	q2	OK	0.299789	0.0233062	-3.68516	12.8631	0.0777421	2.35256	0.0186446	0.0274514	yes
ENSBTAG00000013720	ENSBTAG00000013720	E1B898_BOVIN	5:27759780-27766681	q1	q2	OK	0.722879	0.056247	-3.68391	12.8519	0.0778095	4.40222	1.0715e-05	2.18054e-05	yes
ENSBTAG00000004911	ENSBTAG00000004911	BIRC7	13:54791000-54794387	q1	q2	OK	1.05972	0.0824641	-3.68378	12.8507	0.0778165	3.1368	0.00170805	0.00283508	yes
ENSBTAG00000020080	ENSBTAG00000020080	MYBPC2	18:57039093-57064720	q1	q2	OK	2.70765	0.211529	-3.67811	12.8004	0.0781229	11.6162	0	0	yes
ENSBTAG00000006419	ENSBTAG00000006419	TNNT1_BOVIN	18:62725897-62735263	q1	q2	OK	9.02306	0.705551	-3.67679	12.7887	0.0781944	9.70661	0	0	yes
ENSBTAG00000026836	ENSBTAG00000026836	A1L573_BOVIN	1:45667460-45822623	q1	q2	OK	6.44552	0.504021	-3.67674	12.7882	0.0781972	13.6534	0	0	yes
ENSBTAG00000006835	ENSBTAG00000006835	A8QQF2_BOVIN	15:30414473-30422213	q1	q2	OK	0.290821	0.0227468	-3.67639	12.7851	0.0782161	2.76259	0.0057345	0.00898132	yes
ENSBTAG00000012750	ENSBTAG00000012750	UPK2_BOVIN	15:30073035-30074912	q1	q2	OK	0.987078	0.0772149	-3.67621	12.7835	0.0782259	1.85299	0.0638836	0.0874134	no
ENSBTAG00000015539	ENSBTAG00000015539	RAPGEF5	4:31017032-31222267	q1	q2	NOTEST	0.179257	0.0140525	-3.67313	12.7562	0.0783931	1.94204	0.0521325	1	no
ENSBTAG00000004196	ENSBTAG00000004196	FMNL1	19:45493956-45520053	q1	q2	OK	8.95535	0.703386	-3.67036	12.7318	0.0785437	21.441	0	0	yes
ENSBTAG00000012374	ENSBTAG00000012374	C2orf54	3:120647665-120655025	q1	q2	OK	2.86927	0.225773	-3.66774	12.7086	0.0786865	8.99486	0	0	yes
ENSBTAG00000003682	ENSBTAG00000003682	Q3SZW9_BOVIN	15:54180360-54192907	q1	q2	OK	0.771098	0.0606849	-3.66751	12.7066	0.078699	2.86114	0.00422121	0.0067107	yes
ENSBTAG00000001085	ENSBTAG00000001085	FAM20A	19:62270268-62311718	q1	q2	OK	0.286614	0.0225576	-3.66742	12.7059	0.078704	2.33989	0.0192893	0.0283416	yes
ENSBTAG00000013163	ENSBTAG00000013163	ADAM33	13:51968274-51981601	q1	q2	NOTEST	0.164734	0.012975	-3.66633	12.6963	0.0787634	2.44285	0.014572	1	no
ENSBTAG00000007823	ENSBTAG00000007823	TG	14:9262250-9508938	q1	q2	NOTEST	0.0458049	0.00361913	-3.66179	12.6563	0.0790117	1.77438	0.0759999	1	no
ENSBTAG00000020056	ENSBTAG00000020056	Q9TRM6_BOVIN	9:14869510-14983763	q1	q2	OK	3.90305	0.309033	-3.65877	12.6299	0.0791773	23.3002	0	0	yes
ENSBTAG00000045654	ENSBTAG00000045654	-	14:1127006-1127948	q1	q2	NOTEST	0.258406	0.0205174	-3.65472	12.5945	0.0793998	1.29222	0.19628	1	no
ENSBTAG00000009737	ENSBTAG00000009737	LTC4S_BOVIN	7:1418470-1421386	q1	q2	OK	12.5033	0.995315	-3.65101	12.5622	0.0796043	8.68816	0	0	yes
ENSBTAG00000046635	ENSBTAG00000046635	DDX53	X:127361251-127364903	q1	q2	NOTEST	0.224321	0.017873	-3.64971	12.5508	0.0796761	2.43598	0.0148516	1	no
ENSBTAG00000014288	ENSBTAG00000014288	A6H726_BOVIN	5:97402842-97410006	q1	q2	OK	0.369552	0.0296105	-3.6416	12.4804	0.0801252	1.87738	0.0604662	0.0830167	no
ENSBTAG00000014284	ENSBTAG00000014284	ALPK2	24:58119581-58248068	q1	q2	NOTEST	0.0500041	0.00400781	-3.64116	12.4767	0.0801496	2.2921	0.0218998	1	no
ENSBTAG00000039319	ENSBTAG00000039319	-	7:8508472-8532514	q1	q2	OK	1.49186	0.119592	-3.64092	12.4746	0.080163	5.65122	1.59317e-08	3.95086e-08	yes
ENSBTAG00000012222	ENSBTAG00000012222	FA2H	18:2183490-2237316	q1	q2	OK	1.21482	0.0978786	-3.6336	12.4115	0.0805708	5.4646	4.63962e-08	1.11702e-07	yes
ENSBTAG00000047538	ENSBTAG00000047538	-	17:74154045-74158785	q1	q2	OK	0.443911	0.0357796	-3.63306	12.4068	0.0806009	5.31025	1.09474e-07	2.57099e-07	yes
ENSBTAG00000003574	ENSBTAG00000003574	KIAA1644	5:115683471-115697601	q1	q2	OK	1.19692	0.0965278	-3.63224	12.3997	0.0806467	1.89952	0.0574959	0.0792395	no
ENSBTAG00000048029	ENSBTAG00000048029	MMP1	15:6124134-6132776	q1	q2	OK	5.93234	0.478532	-3.63191	12.397	0.0806652	10.6018	0	0	yes
ENSBTAG00000004459	ENSBTAG00000004459	TMEM45A	1:45281218-45394335	q1	q2	OK	0.909994	0.0734329	-3.63136	12.3922	0.0806959	3.92262	8.75927e-05	0.000164792	yes
ENSBTAG00000020995	ENSBTAG00000020995	-	6:102287967-102288349	q1	q2	NOTEST	0.214381	0.0173072	-3.63073	12.3868	0.0807312	0.268913	0.787997	1	no
ENSBTAG00000016267	ENSBTAG00000016267	F1MMJ0_BOVIN	15:82159473-82172143	q1	q2	OK	2.4575	0.198784	-3.62792	12.3627	0.0808886	7.40475	1.3145e-13	4.29146e-13	yes
ENSBTAG00000009478	ENSBTAG00000009478	GDF9_BOVIN	7:46064179-46067119	q1	q2	OK	0.725408	0.0589637	-3.62089	12.3026	0.0812837	3.94355	8.02846e-05	0.000151798	yes
ENSBTAG00000013492	ENSBTAG00000013492	AAKG3_BOVIN	2:107509451-107516981	q1	q2	OK	0.587992	0.0479588	-3.61593	12.2604	0.0815636	4.60372	4.15011e-06	8.7126e-06	yes
ENSBTAG00000017834	ENSBTAG00000017834	PRELP	16:1041922-1055957	q1	q2	NOTEST	0.159352	0.0130048	-3.6151	12.2533	0.0816106	2.72357	0.00645799	1	no
ENSBTAG00000020049	ENSBTAG00000020049	CABP1_BOVIN	17:65154253-65170682	q1	q2	OK	6.16845	0.5038	-3.61398	12.2438	0.081674	5.63733	1.7271e-08	4.27323e-08	yes
ENSBTAG00000000698	ENSBTAG00000000698	MYO18B	17:67768323-68000455	q1	q2	NOTEST	0.131041	0.010708	-3.61326	12.2377	0.0817147	3.93244	8.40883e-05	1	no
ENSBTAG00000008773	ENSBTAG00000008773	F1MY40_BOVIN	19:28274098-28288583	q1	q2	OK	0.893632	0.0730903	-3.61193	12.2264	0.0817901	7.72088	1.15463e-14	3.96947e-14	yes
ENSBTAG00000016097	ENSBTAG00000016097	CACNA1F	X:92323865-92346483	q1	q2	OK	0.516475	0.0423256	-3.6091	12.2024	0.0819507	6.22611	4.78155e-10	1.30164e-09	yes
ENSBTAG00000047413	ENSBTAG00000047413	E1BFJ8_BOVIN	8:23023862-23024450	q1	q2	NOTEST	0.176383	0.0144593	-3.60865	12.1986	0.0819763	0.477233	0.633196	1	no
ENSBTAG00000040521	ENSBTAG00000040521	A6QL51_BOVIN	19:37159423-37176235	q1	q2	OK	0.654426	0.0536679	-3.6081	12.194	0.0820075	4.13587	3.53606e-05	6.88918e-05	yes
ENSBTAG00000002023	ENSBTAG00000002023	NOS1	17:60047140-60131472	q1	q2	NOTEST	0.10863	0.0089143	-3.60716	12.186	0.082061	2.00653	0.0447994	1	no
ENSBTAG00000006326	ENSBTAG00000006326	ALDH1L2	5:68883545-68928003	q1	q2	OK	17.5893	1.44508	-3.60547	12.1719	0.0821572	26.679	0	0	yes
ENSBTAG00000044091	ENSBTAG00000044091	PTK6	13:54599896-54606206	q1	q2	OK	0.418811	0.034474	-3.60272	12.1486	0.0823139	2.34196	0.0191829	0.028198	yes
ENSBTAG00000020001	ENSBTAG00000020001	C16orf73	25:1394200-1436118	q1	q2	OK	1.69763	0.14006	-3.59941	12.1207	0.082503	5.21457	1.84247e-07	4.26424e-07	yes
ENSBTAG00000044078	ENSBTAG00000044078	TESC	17:60296574-60331722	q1	q2	OK	1.46547	0.121134	-3.59668	12.0979	0.0826592	3.50308	0.000459918	0.000808947	yes
ENSBTAG00000003016	ENSBTAG00000003016	Q58D75_BOVIN	16:70902205-70917245	q1	q2	OK	2.4039	0.199081	-3.59395	12.075	0.0828158	9.24134	0	0	yes
ENSBTAG00000034366	ENSBTAG00000034366	RGS2	16:13041920-13045220	q1	q2	OK	3.82709	0.317385	-3.59194	12.0582	0.0829313	8.16094	2.22045e-16	8.1706e-16	yes
ENSBTAG00000019453	ENSBTAG00000019453	PTGES_BOVIN	11:100143652-100155090	q1	q2	OK	0.532815	0.0444275	-3.58411	11.9929	0.0833826	2.38443	0.0171055	0.0252975	yes
ENSBTAG00000009494	ENSBTAG00000009494	A6QPZ5_BOVIN	18:52943364-52959011	q1	q2	OK	1.18265	0.0986434	-3.58365	11.9891	0.0834092	5.20577	1.93192e-07	4.46047e-07	yes
ENSBTAG00000006572	ENSBTAG00000006572	CARD9	11:103876014-103883072	q1	q2	OK	0.326663	0.0272766	-3.58207	11.9759	0.0835006	2.619	0.00881873	0.01351	yes
ENSBTAG00000010531	ENSBTAG00000010531	F1MNG1_BOVIN	11:20493492-20499001	q1	q2	OK	1.06985	0.0893531	-3.58174	11.9733	0.0835197	5.70866	1.13866e-08	2.84892e-08	yes
ENSBTAG00000020638	ENSBTAG00000020638	A5PKB4_BOVIN	5:71475846-71926718	q1	q2	OK	161.197	13.4758	-3.58038	11.962	0.0835984	44.6605	0	0	yes
ENSBTAG00000001060	ENSBTAG00000001060	CXCR4_BOVIN	2:61582124-61585838	q1	q2	OK	2.66722	0.223429	-3.57745	11.9377	0.0837684	7.80821	5.77316e-15	2.01454e-14	yes
ENSBTAG00000012829	ENSBTAG00000012829	A6QPV0_BOVIN	7:21033475-21040668	q1	q2	NOTEST	0.183606	0.0153997	-3.57564	11.9227	0.0838736	1.14649	0.251593	1	no
ENSBTAG00000031430	ENSBTAG00000031430	Q2KHW2_BOVIN	23:42335198-42354922	q1	q2	OK	3.51478	0.294864	-3.57531	11.92	0.0838928	9.32327	0	0	yes
ENSBTAG00000001029	ENSBTAG00000001029	RASGRP2	29:43590192-43602499	q1	q2	OK	0.595346	0.0499788	-3.57434	11.912	0.0839492	3.88028	0.000104337	0.000194696	yes
ENSBTAG00000025136	ENSBTAG00000025136	MYOZ3	7:64031683-64048678	q1	q2	NOTEST	0.164631	0.013826	-3.57378	11.9073	0.0839818	2.5628	0.0103832	1	no
ENSBTAG00000017946	ENSBTAG00000017946	-	28:41921826-41924801	q1	q2	OK	2.36862	0.198988	-3.57329	11.9033	0.0840103	3.37704	0.000732699	0.0012632	yes
ENSBTAG00000023369	ENSBTAG00000023369	GRIN2D	18:55540748-55569682	q1	q2	OK	0.430469	0.0362406	-3.57023	11.8781	0.0841887	4.17002	3.04569e-05	5.96596e-05	yes
ENSBTAG00000022255	ENSBTAG00000022255	AR	X:88410763-88621166	q1	q2	NOTEST	0.129486	0.0109308	-3.56632	11.846	0.0844172	2.24253	0.0249271	1	no
ENSBTAG00000020742	ENSBTAG00000020742	FZD9	25:34245428-34247198	q1	q2	OK	5.0105	0.423113	-3.56584	11.842	0.0844452	11.0502	0	0	yes
ENSBTAG00000000009	ENSBTAG00000000009	FOXF1	18:12379749-12382722	q1	q2	OK	1.942	0.164089	-3.56499	11.835	0.084495	6.39252	1.63177e-10	4.56976e-10	yes
ENSBTAG00000004951	ENSBTAG00000004951	CK001_BOVIN	15:22547741-22557344	q1	q2	OK	4.18081	0.354051	-3.56175	11.8085	0.084685	7.09711	1.27387e-12	3.97303e-12	yes
ENSBTAG00000008519	ENSBTAG00000008519	-	27:4788446-4815238	q1	q2	NOTEST	0.129548	0.0109827	-3.56018	11.7956	0.0847772	1.04008	0.298304	1	no
ENSBTAG00000039657	ENSBTAG00000039657	F2Z4J1_BOVIN	23:31579046-31589230	q1	q2	OK	14.9081	1.26602	-3.55772	11.7756	0.0849219	11.1335	0	0	yes
ENSBTAG00000018549	ENSBTAG00000018549	SPAG16	2:101882144-101924558	q1	q2	OK	1.3037	0.110785	-3.55677	11.7678	0.0849778	2.45659	0.0140262	0.0209395	yes
ENSBTAG00000046482	ENSBTAG00000046482	-	10:26113953-26114424	q1	q2	OK	2.99946	0.255469	-3.55348	11.741	0.0851718	3.26922	0.00107846	0.00182715	yes
ENSBTAG00000006626	ENSBTAG00000006626	TMEM132B	17:52565555-52785519	q1	q2	NOTEST	0.252755	0.0215338	-3.55307	11.7376	0.085196	2.69011	0.00714281	1	no
ENSBTAG00000017242	ENSBTAG00000017242	FADS6_BOVIN	19:57141971-57157895	q1	q2	OK	14.4501	1.23294	-3.5509	11.72	0.0853243	16.147	0	0	yes
ENSBTAG00000011538	ENSBTAG00000011538	KIF1A	3:120502457-120608549	q1	q2	OK	3.91009	0.33438	-3.54764	11.6936	0.0855173	18.0668	0	0	yes
ENSBTAG00000018508	ENSBTAG00000018508	TMEM108	1:137111100-137126880	q1	q2	OK	9.40227	0.804157	-3.54746	11.6921	0.085528	14.8916	0	0	yes
ENSBTAG00000045986	ENSBTAG00000045986	MIA2	21:49637066-49648037	q1	q2	OK	0.890419	0.0761803	-3.54699	11.6883	0.0855558	4.58211	4.60305e-06	9.62869e-06	yes
ENSBTAG00000007149	ENSBTAG00000007149	NYNRIN	10:20590621-20600789	q1	q2	OK	1.96173	0.168333	-3.54274	11.6539	0.0858082	12.8287	0	0	yes
ENSBTAG00000004542	ENSBTAG00000004542	A5PJ92_BOVIN	11:101477075-101489330	q1	q2	OK	9.1726	0.787195	-3.54254	11.6523	0.0858201	13.5325	0	0	yes
ENSBTAG00000007353	ENSBTAG00000007353	A5D7U2_BOVIN	19:37314776-37325265	q1	q2	OK	12.4406	1.06874	-3.54108	11.6404	0.085907	18.0307	0	0	yes
ENSBTAG00000009870	ENSBTAG00000009870	HES6	3:118182615-118184696	q1	q2	OK	1.32374	0.113768	-3.54044	11.6354	0.0859451	5.60422	2.09195e-08	5.14309e-08	yes
ENSBTAG00000016137	ENSBTAG00000016137	ZNF608	7:30346722-30452439	q1	q2	OK	2.96136	0.254661	-3.53961	11.6286	0.0859946	14.8544	0	0	yes
ENSBTAG00000006643	ENSBTAG00000006643	C6H4orf19	6:58486549-58565108	q1	q2	OK	0.650619	0.0559912	-3.53854	11.62	0.0860584	3.94789	7.88436e-05	0.00014923	yes
ENSBTAG00000009867	ENSBTAG00000009867	F71F1_BOVIN	4:93508703-93524304	q1	q2	OK	1.34068	0.115632	-3.53535	11.5944	0.0862489	5.39208	6.96464e-08	1.65644e-07	yes
ENSBTAG00000030246	ENSBTAG00000030246	ENTPD8	11:105698113-105711512	q1	q2	OK	0.384912	0.03335	-3.52877	11.5416	0.0866432	3.06937	0.0021451	0.00351956	yes
ENSBTAG00000043993	ENSBTAG00000043993	C1H21orf62	1:2029405-2048813	q1	q2	OK	3.35723	0.290992	-3.52822	11.5372	0.0866762	8.58263	0	0	yes
ENSBTAG00000018446	ENSBTAG00000018446	GCA	2:34173877-34193022	q1	q2	OK	209.323	18.1722	-3.52593	11.5189	0.0868139	45.9455	0	0	yes
ENSBTAG00000047274	ENSBTAG00000047274	KIF21B	16:81388496-81434502	q1	q2	OK	14.0368	1.22072	-3.52342	11.4988	0.0869651	29.2326	0	0	yes
ENSBTAG00000000507	ENSBTAG00000000507	NR4A1_BOVIN	5:27977006-27992869	q1	q2	OK	15.5454	1.35891	-3.51596	11.4396	0.0874159	15.8416	0	0	yes
ENSBTAG00000021872	ENSBTAG00000021872	RASGRP1	10:34202005-34280992	q1	q2	OK	0.874784	0.0765157	-3.5151	11.4327	0.0874681	6.23475	4.52512e-10	1.2337e-09	yes
ENSBTAG00000005841	ENSBTAG00000005841	-	18:63349486-63355736	q1	q2	OK	0.357457	0.0312693	-3.51495	11.4316	0.0874771	2.2552	0.0241205	0.0350821	yes
ENSBTAG00000003434	ENSBTAG00000003434	CERS4_BOVIN	7:18128318-18163612	q1	q2	OK	1.26471	0.110648	-3.51475	11.43	0.0874893	5.22018	1.78752e-07	4.14058e-07	yes
ENSBTAG00000012205	ENSBTAG00000012205	CPT1C	18:56547751-56566692	q1	q2	OK	0.594565	0.0520231	-3.51461	11.4289	0.0874978	4.58979	4.4369e-06	9.2907e-06	yes
ENSBTAG00000046026	ENSBTAG00000046026	S39A4_BOVIN	14:1719731-1724220	q1	q2	NOTEST	0.168935	0.0147896	-3.51381	11.4226	0.0875463	2.33589	0.0194972	1	no
ENSBTAG00000021218	ENSBTAG00000021218	MLRS_BOVIN	25:26815265-26817727	q1	q2	OK	2.10931	0.184834	-3.51247	11.4119	0.0876277	3.8234	0.000131625	0.000243106	yes
ENSBTAG00000019548	ENSBTAG00000019548	-	X:18793750-18794357	q1	q2	OK	1.22873	0.107754	-3.51136	11.4031	0.0876951	2.51558	0.0118838	0.0179288	yes
ENSBTAG00000009332	ENSBTAG00000009332	TTLL6	19:38363730-38394137	q1	q2	OK	0.57161	0.0501577	-3.51049	11.3963	0.087748	3.94436	8.00138e-05	0.000151321	yes
ENSBTAG00000002744	ENSBTAG00000002744	MUSK	8:101881882-101976250	q1	q2	OK	0.402108	0.0353066	-3.50958	11.389	0.0878034	3.94101	8.11377e-05	0.000153322	yes
ENSBTAG00000005685	ENSBTAG00000005685	HSD11B2	18:35159765-35165470	q1	q2	OK	1.34678	0.118347	-3.50842	11.3799	0.087874	6.01981	1.74622e-09	4.5952e-09	yes
ENSBTAG00000012538	ENSBTAG00000012538	F1MXS5_BOVIN	18:57495323-57499297	q1	q2	OK	0.627133	0.0552402	-3.50498	11.3528	0.0880838	1.84968	0.0643602	0.087999	no
ENSBTAG00000019229	ENSBTAG00000019229	TMEM144	17:41671503-41719161	q1	q2	OK	1.11629	0.0983931	-3.50401	11.3452	0.088143	6.94449	3.7983e-12	1.15561e-11	yes
ENSBTAG00000031468	ENSBTAG00000031468	HIST3H2A	17:68596868-68597323	q1	q2	OK	2.37915	0.210488	-3.49864	11.303	0.0884717	2.51427	0.011928	0.0179888	yes
ENSBTAG00000021643	ENSBTAG00000021643	C3orf25	22:56965858-56983710	q1	q2	OK	0.764347	0.0676271	-3.49856	11.3024	0.0884766	4.25347	2.10484e-05	4.18191e-05	yes
ENSBTAG00000006139	ENSBTAG00000006139	TRPM4	18:56114585-56157345	q1	q2	OK	8.63117	0.76402	-3.49787	11.297	0.0885189	22.1703	0	0	yes
ENSBTAG00000048167	ENSBTAG00000048167	-	17:64874907-64875048	q1	q2	OK	9.84827	0.871774	-3.49784	11.2968	0.0885208	0.59712	0.550427	0.612096	no
ENSBTAG00000010070	ENSBTAG00000010070	GSDMA	19:40943949-40955437	q1	q2	OK	0.358859	0.0318166	-3.49557	11.279	0.0886602	2.05809	0.0395812	0.055822	no
ENSBTAG00000013201	ENSBTAG00000013201	AL5AP_BOVIN	12:30136997-30159808	q1	q2	OK	0.594306	0.0527956	-3.49272	11.2567	0.0888355	1.79538	0.0725934	0.0984535	no
ENSBTAG00000034498	ENSBTAG00000034498	LY6D_BOVIN	14:2801382-2803020	q1	q2	OK	0.615546	0.0548579	-3.4881	11.2207	0.0891204	2.1839	0.0289696	0.0416396	yes
ENSBTAG00000019107	ENSBTAG00000019107	C9EH46_BOVIN	19:29670743-29876650	q1	q2	NOTEST	0.281253	0.0250839	-3.48704	11.2125	0.0891859	3.01092	0.00260459	1	no
ENSBTAG00000013298	ENSBTAG00000013298	PA24A_BOVIN	16:69443237-69620712	q1	q2	OK	7.78523	0.695448	-3.48472	11.1946	0.0893295	18.035	0	0	yes
ENSBTAG00000040485	ENSBTAG00000040485	THEG	7:44639890-44650050	q1	q2	OK	0.387215	0.0346235	-3.48331	11.1836	0.0894168	1.93388	0.0531282	0.0735753	no
ENSBTAG00000009457	ENSBTAG00000009457	-	X:52793106-52794418	q1	q2	OK	9.2878	0.831465	-3.48161	11.1704	0.0895222	10.6443	0	0	yes
ENSBTAG00000006367	ENSBTAG00000006367	CTGF_BOVIN	9:70873220-70876455	q1	q2	OK	373.192	33.4096	-3.48159	11.1702	0.0895235	45.2388	0	0	yes
ENSBTAG00000010986	ENSBTAG00000010986	KCNQ1	29:49676545-49689396	q1	q2	OK	1.84888	0.16626	-3.47514	11.1204	0.0899246	4.69401	2.67895e-06	5.70732e-06	yes
ENSBTAG00000011036	ENSBTAG00000011036	-	18:52638276-52675994	q1	q2	OK	1.45126	0.130637	-3.47366	11.1091	0.0900169	6.20059	5.62532e-10	1.5247e-09	yes
ENSBTAG00000006515	ENSBTAG00000006515	ESPN	16:47757076-47791502	q1	q2	OK	3.53448	0.318387	-3.47265	11.1012	0.09008	11.6682	0	0	yes
ENSBTAG00000026825	ENSBTAG00000026825	Q3ZCJ1_BOVIN	2:71607733-71613808	q1	q2	OK	69.4358	6.25662	-3.47222	11.098	0.0901068	28.0977	0	0	yes
ENSBTAG00000011986	ENSBTAG00000011986	A2VE63_BOVIN	1:123231175-123273104	q1	q2	OK	7.33124	0.661453	-3.47035	11.0835	0.0902237	18.2556	0	0	yes
ENSBTAG00000005858	ENSBTAG00000005858	E1BN00_BOVIN	3:113064292-113194137	q1	q2	NOTEST	0.0723414	0.0065439	-3.4666	11.0548	0.0904585	0.683657	0.494192	1	no
ENSBTAG00000000841	ENSBTAG00000000841	LZTS1	8:67861050-67867745	q1	q2	OK	8.70079	0.789625	-3.46191	11.0189	0.0907531	15.3929	0	0	yes
ENSBTAG00000045878	ENSBTAG00000045878	-	15:62799409-62799790	q1	q2	NOTEST	0.207122	0.0188185	-3.46025	11.0063	0.0908575	0.277136	0.781676	1	no
ENSBTAG00000015981	ENSBTAG00000015981	ETV1_BOVIN	4:22042176-22145007	q1	q2	OK	2.25915	0.205344	-3.45966	11.0018	0.0908947	8.75211	0	0	yes
ENSBTAG00000017411	ENSBTAG00000017411	KAD5_BOVIN	3:67354500-67614628	q1	q2	NOTEST	0.144743	0.0131802	-3.45705	10.9819	0.0910593	2.19835	0.0279241	1	no
ENSBTAG00000038865	ENSBTAG00000038865	TCEA3	2:130023500-130069587	q1	q2	OK	0.358415	0.0326406	-3.45689	10.9806	0.0910694	1.91638	0.0553169	0.0763918	no
ENSBTAG00000006862	ENSBTAG00000006862	MEIS3	18:54825680-54836604	q1	q2	OK	11.2029	1.02259	-3.45357	10.9554	0.0912792	15.5279	0	0	yes
ENSBTAG00000016574	ENSBTAG00000016574	Q17QT9_BOVIN	25:292323-299280	q1	q2	OK	2.40802	0.219874	-3.4531	10.9518	0.0913089	6.64133	3.10874e-11	9.02765e-11	yes
ENSBTAG00000011106	ENSBTAG00000011106	A5PK71_BOVIN	9:99649025-100180707	q1	q2	NOTEST	0.197795	0.0180623	-3.45296	10.9507	0.0913178	0.680598	0.496126	1	no
ENSBTAG00000011671	ENSBTAG00000011671	-	23:31589470-31607791	q1	q2	OK	0.980694	0.0898424	-3.44833	10.9157	0.0916113	2.21822	0.0265398	0.0383471	yes
ENSBTAG00000011057	ENSBTAG00000011057	A6H760_BOVIN	23:7662063-7667198	q1	q2	OK	0.34531	0.0317769	-3.44184	10.8667	0.0920244	1.90706	0.0565129	0.0779441	no
ENSBTAG00000012475	ENSBTAG00000012475	F1MXD8_BOVIN	19:28329830-28341331	q1	q2	OK	2.32945	0.214505	-3.44091	10.8597	0.0920837	8.29216	2.22045e-16	8.1706e-16	yes
ENSBTAG00000020848	ENSBTAG00000020848	A6QPT0_BOVIN	4:48267574-48302663	q1	q2	OK	0.493683	0.0455392	-3.4384	10.8408	0.0922441	5.18704	2.13665e-07	4.92408e-07	yes
ENSBTAG00000012785	ENSBTAG00000012785	TEPP_BOVIN	18:25970367-25977551	q1	q2	OK	0.443848	0.04096	-3.43778	10.8361	0.0922837	1.62434	0.104304	0.138165	no
ENSBTAG00000016534	ENSBTAG00000016534	Q17QR0_BOVIN	11:43071976-43174031	q1	q2	OK	3.03445	0.28038	-3.43598	10.8226	0.0923989	7.42183	1.15463e-13	3.78015e-13	yes
ENSBTAG00000017628	ENSBTAG00000017628	MAP7D2	X:29753488-29792607	q1	q2	OK	0.820479	0.0758113	-3.43598	10.8226	0.0923989	5.10805	3.25503e-07	7.40184e-07	yes
ENSBTAG00000002554	ENSBTAG00000002554	FAM115A	4:107839225-107876940	q1	q2	OK	22.664	2.09763	-3.43357	10.8046	0.0925534	35.724	0	0	yes
ENSBTAG00000003255	ENSBTAG00000003255	A7YY52_BOVIN	5:103995315-104017746	q1	q2	NOTEST	0.251123	0.0232527	-3.43292	10.7997	0.0925951	1.65367	0.0981944	1	no
ENSBTAG00000021009	ENSBTAG00000021009	TRIM55	14:32164441-32210852	q1	q2	OK	0.526264	0.0487599	-3.43202	10.793	0.0926529	2.8018	0.00508186	0.00800694	yes
ENSBTAG00000021899	ENSBTAG00000021899	PDE9A	1:144493956-144603437	q1	q2	OK	9.97219	0.924122	-3.43175	10.791	0.0926702	14.8473	0	0	yes
ENSBTAG00000000821	ENSBTAG00000000821	GPR137C	10:11495133-11555270	q1	q2	OK	0.445323	0.0413114	-3.43024	10.7797	0.0927673	2.80791	0.00498634	0.00786407	yes
ENSBTAG00000015091	ENSBTAG00000015091	-	15:55809022-55817425	q1	q2	OK	0.37378	0.034733	-3.42781	10.7615	0.0929237	2.08581	0.0369961	0.0524125	no
ENSBTAG00000024496	ENSBTAG00000024496	A7YWU4_BOVIN	16:53250583-53288451	q1	q2	NOTEST	0.212284	0.0197376	-3.42698	10.7553	0.0929771	1.0983	0.272075	1	no
ENSBTAG00000002104	ENSBTAG00000002104	RHPN1	14:2462543-2471434	q1	q2	OK	27.8432	2.58986	-3.42638	10.7509	0.0930158	26.7252	0	0	yes
ENSBTAG00000039384	ENSBTAG00000039384	A4IFU9_BOVIN	6:26043474-26064216	q1	q2	OK	0.542953	0.0506021	-3.42356	10.7299	0.0931978	2.91661	0.00353863	0.00567549	yes
ENSBTAG00000015810	ENSBTAG00000015810	PLET1_BOVIN	15:22978371-22990478	q1	q2	OK	0.455814	0.0426766	-3.41693	10.6807	0.0936271	2.95669	0.00310957	0.00501303	yes
ENSBTAG00000020190	ENSBTAG00000020190	KREMEN2	25:2372470-2377363	q1	q2	NOTEST	0.204767	0.0191851	-3.41592	10.6732	0.0936927	1.6454	0.0998865	1	no
ENSBTAG00000003741	ENSBTAG00000003741	NEURL	26:24330860-24403159	q1	q2	OK	0.289236	0.0272176	-3.40963	10.6268	0.0941021	3.19793	0.00138416	0.00231614	yes
ENSBTAG00000004296	ENSBTAG00000004296	MORN5_BOVIN	11:93029873-93064357	q1	q2	OK	1.07999	0.101826	-3.40684	10.6062	0.0942842	2.78534	0.00534716	0.00840378	yes
ENSBTAG00000020060	ENSBTAG00000020060	A7Z054_BOVIN	3:21489096-21493251	q1	q2	OK	33.5429	3.16363	-3.40635	10.6027	0.0943162	32.4317	0	0	yes
ENSBTAG00000000816	ENSBTAG00000000816	PRDM1	9:44355219-44377512	q1	q2	OK	1.46933	0.138731	-3.40479	10.5912	0.0944183	10.5821	0	0	yes
ENSBTAG00000012305	ENSBTAG00000012305	F1MZ71_BOVIN	3:62643352-62805720	q1	q2	OK	2.53214	0.239417	-3.40276	10.5763	0.0945512	15.0934	0	0	yes
ENSBTAG00000027405	ENSBTAG00000027405	CT195_BOVIN	13:54587433-54590029	q1	q2	OK	1.71545	0.162295	-3.4019	10.5699	0.0946076	4.68083	2.85714e-06	6.07662e-06	yes
ENSBTAG00000018185	ENSBTAG00000018185	ASB4	4:12597837-12699701	q1	q2	OK	0.601417	0.0569523	-3.40054	10.56	0.0946968	2.83721	0.0045509	0.00720806	yes
ENSBTAG00000013488	ENSBTAG00000013488	A5PK48_BOVIN	10:36468113-36478924	q1	q2	OK	0.960335	0.0909683	-3.4001	10.5568	0.0947257	2.96265	0.00305002	0.00492093	yes
ENSBTAG00000020622	ENSBTAG00000020622	Q7M2Q6_BOVIN	3:106396859-106410914	q1	q2	OK	0.818103	0.0775623	-3.39886	10.5477	0.0948072	4.62607	3.72668e-06	7.84697e-06	yes
ENSBTAG00000044132	ENSBTAG00000044132	NTN5	18:55745677-55751319	q1	q2	OK	0.297466	0.0282695	-3.39541	10.5225	0.0950342	2.39406	0.0166629	0.0246789	yes
ENSBTAG00000021434	ENSBTAG00000021434	EDN2_BOVIN	3:105299334-105305259	q1	q2	OK	12.9139	1.22809	-3.39444	10.5154	0.0950981	14.6881	0	0	yes
ENSBTAG00000017313	ENSBTAG00000017313	CECR1	5:109436266-109454513	q1	q2	OK	0.289272	0.0275642	-3.39156	10.4945	0.0952881	2.15167	0.031423	0.0449991	yes
ENSBTAG00000046463	ENSBTAG00000046463	-	X:71676361-71677651	q1	q2	OK	0.817923	0.078031	-3.38985	10.482	0.0954011	3.33968	0.000838762	0.00143671	yes
ENSBTAG00000004490	ENSBTAG00000004490	TRIM31	23:28665989-28676508	q1	q2	OK	3.68037	0.351418	-3.38859	10.4729	0.0954845	8.68531	0	0	yes
ENSBTAG00000005629	ENSBTAG00000005629	A8E4N1_BOVIN	2:127370016-127395010	q1	q2	NOTEST	0.203784	0.0194609	-3.38839	10.4715	0.0954977	3.56543	0.000363256	1	no
ENSBTAG00000047073	ENSBTAG00000047073	-	16:70925148-70928253	q1	q2	OK	7.87861	0.754058	-3.3852	10.4483	0.0957091	8.61379	0	0	yes
ENSBTAG00000030921	ENSBTAG00000030921	FAM3B	1:143048261-143115094	q1	q2	OK	1.00831	0.0965304	-3.38481	10.4455	0.095735	2.76944	0.00561531	0.0088065	yes
ENSBTAG00000002585	ENSBTAG00000002585	B2DG20_BOVIN	X:81604862-81621189	q1	q2	OK	1.7532	0.167897	-3.38434	10.4421	0.0957662	5.32297	1.02088e-07	2.40203e-07	yes
ENSBTAG00000020582	ENSBTAG00000020582	E1BNJ9_BOVIN	25:2179212-2183525	q1	q2	OK	1.13437	0.108636	-3.38432	10.4419	0.0957675	3.2058	0.00134687	0.00225768	yes
ENSBTAG00000009217	ENSBTAG00000009217	F1MEW8_BOVIN	2:107564020-107576619	q1	q2	NOTEST	0.216457	0.0207682	-3.38163	10.4225	0.0959462	2.239	0.0251558	1	no
ENSBTAG00000019947	ENSBTAG00000019947	SYT7	29:40682319-40716882	q1	q2	OK	6.60488	0.635179	-3.3783	10.3985	0.096168	14.8433	0	0	yes
ENSBTAG00000043232	ENSBTAG00000043232	U6	3:8395604-8407551	q1	q2	OK	7.83782	0.75407	-3.37768	10.394	0.0962093	0.178187	0.858576	0.889241	no
ENSBTAG00000000095	ENSBTAG00000000095	C5NU11_BOVIN	8:39497222-39514616	q1	q2	OK	0.925531	0.0891789	-3.37551	10.3784	0.0963541	3.91678	8.97397e-05	0.000168578	yes
ENSBTAG00000014149	ENSBTAG00000014149	E1B6Z6_BOVIN	11:98793762-98797809	q1	q2	OK	0.905817	0.0874109	-3.37333	10.3627	0.0964998	2.10236	0.0355218	0.0504601	no
ENSBTAG00000006739	ENSBTAG00000006739	KRT81_BOVIN	5:27777445-27783331	q1	q2	OK	0.584394	0.0563982	-3.37322	10.3619	0.0965072	3.87913	0.000104829	0.00019554	yes
ENSBTAG00000038261	ENSBTAG00000038261	-	16:55916705-55919229	q1	q2	NOTEST	0.169044	0.0163145	-3.37317	10.3616	0.0965105	1.31103	0.189848	1	no
ENSBTAG00000001927	ENSBTAG00000001927	A4IFJ9_BOVIN	11:86858115-86918106	q1	q2	OK	11.7699	1.13625	-3.37275	10.3585	0.0965386	15.8896	0	0	yes
ENSBTAG00000011434	ENSBTAG00000011434	ANPRB_BOVIN	8:60368096-60379016	q1	q2	OK	3.9178	0.378245	-3.37265	10.3578	0.0965453	10.1968	0	0	yes
ENSBTAG00000031625	ENSBTAG00000031625	HRH3	13:55519322-55521407	q1	q2	OK	12.4312	1.20207	-3.37037	10.3415	0.096698	13.3118	0	0	yes
ENSBTAG00000045603	ENSBTAG00000045603	PCDHB4	7:53908353-53910744	q1	q2	OK	2.8276	0.273692	-3.36895	10.3313	0.0967932	10.0099	0	0	yes
ENSBTAG00000004510	ENSBTAG00000004510	E1BB28_BOVIN	11:104578932-104634907	q1	q2	OK	0.382187	0.0370132	-3.36817	10.3257	0.0968456	3.68781	0.000226189	0.000409121	yes
ENSBTAG00000034901	ENSBTAG00000034901	HIST3H2BB	7:2484674-2485418	q1	q2	OK	2.45883	0.238228	-3.36756	10.3213	0.0968865	1.97972	0.0477352	0.0665829	no
ENSBTAG00000002019	ENSBTAG00000002019	A4FV69_BOVIN	24:62248908-62271054	q1	q2	OK	14.6235	1.41838	-3.36597	10.31	0.0969934	17.087	0	0	yes
ENSBTAG00000019791	ENSBTAG00000019791	GRHL3	2:129160818-129183500	q1	q2	OK	0.955342	0.0931321	-3.35867	10.2579	0.0974854	4.71005	2.47653e-06	5.29203e-06	yes
ENSBTAG00000011579	ENSBTAG00000011579	CHRM1	29:41919873-41921707	q1	q2	NOTEST	0.25093	0.0244893	-3.35706	10.2465	0.0975943	2.21954	0.02645	1	no
ENSBTAG00000004594	ENSBTAG00000004594	MMP7	15:6390159-6400322	q1	q2	OK	278.108	27.1459	-3.35684	10.2449	0.0976091	41.8785	0	0	yes
ENSBTAG00000045821	ENSBTAG00000045821	-	15:22547741-22557344	q1	q2	OK	4.04385	0.395099	-3.35544	10.235	0.0977039	5.06197	4.14951e-07	9.36907e-07	yes
ENSBTAG00000017187	ENSBTAG00000017187	A4IFG3_BOVIN	X:4995336-5043066	q1	q2	OK	1.48963	0.145577	-3.35509	10.2326	0.0977276	8.44331	0	0	yes
ENSBTAG00000002215	ENSBTAG00000002215	GFPT2_BOVIN	7:772144-817756	q1	q2	NOTEST	0.187789	0.0183559	-3.35479	10.2304	0.0977479	2.72386	0.00645232	1	no
ENSBTAG00000047070	ENSBTAG00000047070	-	15:29476821-29516720	q1	q2	OK	26.4913	2.59007	-3.35446	10.228	0.0977703	0.602115	0.547097	0.608847	no
ENSBTAG00000045999	ENSBTAG00000045999	-	9:9699646-9700027	q1	q2	NOTEST	0.127709	0.0124896	-3.35407	10.2252	0.0977967	0.177384	0.859207	1	no
ENSBTAG00000026580	ENSBTAG00000026580	F1MB93_BOVIN	9:63762921-63764019	q1	q2	OK	0.873703	0.0857758	-3.3485	10.1859	0.098175	3.00272	0.00267575	0.00434552	yes
ENSBTAG00000008626	ENSBTAG00000008626	KCNN1	7:5111699-5134438	q1	q2	OK	8.91587	0.875437	-3.3483	10.1845	0.0981886	14.5958	0	0	yes
ENSBTAG00000015670	ENSBTAG00000015670	PAK3	X:64404548-64659083	q1	q2	OK	8.72293	0.857636	-3.34637	10.1709	0.0983201	14.2412	0	0	yes
ENSBTAG00000004955	ENSBTAG00000004955	SYTL5	X:110714228-110797438	q1	q2	OK	0.615299	0.060763	-3.34002	10.1262	0.0987538	4.30775	1.6492e-05	3.3098e-05	yes
ENSBTAG00000004405	ENSBTAG00000004405	IQUB	4:88570538-88642925	q1	q2	OK	2.10176	0.207596	-3.33975	10.1243	0.0987723	8.96862	0	0	yes
ENSBTAG00000002199	ENSBTAG00000002199	F1N2B7_BOVIN	6:67925292-68176596	q1	q2	NOTEST	0.101715	0.0100673	-3.33678	10.1035	0.0989758	2.20334	0.0275708	1	no
ENSBTAG00000047268	ENSBTAG00000047268	WT1	15:63913733-63965294	q1	q2	NOTEST	0.225575	0.0223601	-3.33461	10.0883	0.0991248	2.02571	0.0427942	1	no
ENSBTAG00000017390	ENSBTAG00000017390	LGI2	6:46127371-46155777	q1	q2	NOTEST	0.16295	0.0161587	-3.33405	10.0844	0.0991633	2.20091	0.0277427	1	no
ENSBTAG00000014975	ENSBTAG00000014975	SLC4A3	2:108273127-108286884	q1	q2	OK	0.641774	0.0636716	-3.33334	10.0794	0.0992121	6.04491	1.4949e-09	3.95366e-09	yes
ENSBTAG00000026263	ENSBTAG00000026263	ZNF45	18:52429557-52446106	q1	q2	OK	2.51421	0.249476	-3.33313	10.078	0.0992265	10.7802	0	0	yes
ENSBTAG00000007890	ENSBTAG00000007890	SEC14L5	25:4033531-4069992	q1	q2	OK	11.7495	1.16669	-3.33211	10.0708	0.0992967	18.6776	0	0	yes
ENSBTAG00000040111	ENSBTAG00000040111	OTOP3	19:57097871-57105114	q1	q2	OK	0.416408	0.0413485	-3.33209	10.0707	0.0992981	3.5976	0.000321172	0.000572647	yes
ENSBTAG00000012782	ENSBTAG00000012782	AQP6	5:30070403-30072958	q1	q2	OK	1.21958	0.121147	-3.33156	10.0669	0.0993346	3.4729	0.000514861	0.000901006	yes
ENSBTAG00000036215	ENSBTAG00000036215	-	18:63602390-63604895	q1	q2	OK	0.770144	0.0765337	-3.33096	10.0628	0.0993759	3.11559	0.00183579	0.0030378	yes
ENSBTAG00000000667	ENSBTAG00000000667	A6QPR4_BOVIN	5:75056434-75084280	q1	q2	OK	9.42936	0.938365	-3.32894	10.0487	0.0995152	12.3332	0	0	yes
ENSBTAG00000025755	ENSBTAG00000025755	C14orf164	10:21466336-21494696	q1	q2	OK	1.14023	0.113485	-3.32875	10.0474	0.0995283	3.51483	0.000440034	0.000775734	yes
ENSBTAG00000031476	ENSBTAG00000031476	DLL1	9:105508312-105516028	q1	q2	OK	0.541467	0.0539476	-3.32724	10.0369	0.0996325	3.93105	8.45743e-05	0.000159409	yes
ENSBTAG00000014382	ENSBTAG00000014382	A6QP03_BOVIN	3:83834790-83876648	q1	q2	NOTEST	0.268384	0.0267813	-3.325	10.0213	0.0997873	3.46345	0.000533293	1	no
ENSBTAG00000031186	ENSBTAG00000031186	Q0V7P3_BOVIN	3:54759287-54769809	q1	q2	NOTEST	0.145399	0.0145424	-3.32168	9.99828	0.100017	0.963603	0.335245	1	no
ENSBTAG00000047138	ENSBTAG00000047138	V2R_BOVIN	X:40036422-40038823	q1	q2	OK	0.562309	0.0563013	-3.32012	9.9875	0.100125	3.09152	0.00199137	0.00327991	yes
ENSBTAG00000038680	ENSBTAG00000038680	-	7:17185613-17186690	q1	q2	OK	0.983664	0.0985063	-3.31988	9.9858	0.100142	3.31548	0.000914855	0.00155939	yes
ENSBTAG00000044105	ENSBTAG00000044105	FOXO1	12:21915746-22005338	q1	q2	OK	5.00047	0.501003	-3.31917	9.98092	0.100191	11.5053	0	0	yes
ENSBTAG00000014296	ENSBTAG00000014296	NCCRP1	18:49184590-49189071	q1	q2	OK	0.570176	0.0571811	-3.3178	9.97141	0.100287	1.63308	0.102452	0.136001	no
ENSBTAG00000020548	ENSBTAG00000020548	ADC	2:121400543-121444433	q1	q2	OK	16.025	1.61069	-3.31458	9.94915	0.100511	19.6696	0	0	yes
ENSBTAG00000046144	ENSBTAG00000046144	DEFB7_BOVIN	27:5219283-5227956	q1	q2	OK	1.29925	0.130924	-3.31087	9.9237	0.100769	1.61672	0.10594	0.140184	no
ENSBTAG00000024115	ENSBTAG00000024115	FOXO6	3:105414635-105435303	q1	q2	OK	2.69172	0.271494	-3.30953	9.91447	0.100863	7.96709	1.55431e-15	5.55849e-15	yes
ENSBTAG00000004019	ENSBTAG00000004019	PMEL	5:57669834-57677941	q1	q2	OK	10.7065	1.07991	-3.3095	9.91425	0.100865	17.6378	0	0	yes
ENSBTAG00000003033	ENSBTAG00000003033	GA45G_BOVIN	8:90017452-90018996	q1	q2	OK	10.3094	1.04032	-3.30885	9.90984	0.100911	12.0596	0	0	yes
ENSBTAG00000007446	ENSBTAG00000007446	NGF_BOVIN	3:28124614-28125503	q1	q2	OK	2.33073	0.23526	-3.30846	9.90704	0.100938	5.01978	5.17314e-07	1.16014e-06	yes
ENSBTAG00000046499	ENSBTAG00000046499	-	26:25928927-25930145	q1	q2	OK	0.769193	0.0777212	-3.30697	9.89682	0.101042	1.69624	0.0898402	0.120349	no
ENSBTAG00000046554	ENSBTAG00000046554	-	9:65961245-65962157	q1	q2	OK	0.631013	0.0637673	-3.30678	9.89556	0.101056	2.38318	0.0171638	0.0253768	yes
ENSBTAG00000013015	ENSBTAG00000013015	CCDC13	22:15467486-15499957	q1	q2	NOTEST	0.262497	0.0265542	-3.30529	9.88533	0.10116	2.11361	0.0345482	1	no
ENSBTAG00000019014	ENSBTAG00000019014	Q3MHY2_BOVIN	1:83090389-83091984	q1	q2	OK	8.71588	0.881899	-3.30496	9.88308	0.101183	13.9508	0	0	yes
ENSBTAG00000000719	ENSBTAG00000000719	-	4:111220050-111231644	q1	q2	OK	0.687211	0.0695542	-3.30454	9.88022	0.101213	2.06319	0.039095	0.0551602	no
ENSBTAG00000003829	ENSBTAG00000003829	A1L5C6_BOVIN	18:45971858-45991833	q1	q2	OK	0.613707	0.0621235	-3.30434	9.87882	0.101227	3.67844	0.000234663	0.00042379	yes
ENSBTAG00000011447	ENSBTAG00000011447	FAM171A2	19:44782787-44792763	q1	q2	OK	8.91476	0.902705	-3.30387	9.87561	0.10126	17.7381	0	0	yes
ENSBTAG00000015735	ENSBTAG00000015735	Q0V896_BOVIN	7:8431772-8450807	q1	q2	NOTEST	0.218506	0.0221538	-3.30205	9.86314	0.101387	2.55979	0.0104734	1	no
ENSBTAG00000031017	ENSBTAG00000031017	-	15:81366668-81407542	q1	q2	NOTEST	0.20916	0.0212062	-3.30205	9.86315	0.101387	2.00236	0.045246	1	no
ENSBTAG00000047667	ENSBTAG00000047667	-	19:50848868-50849924	q1	q2	OK	0.393587	0.0399237	-3.30137	9.85848	0.101435	1.69311	0.0904344	0.121046	no
ENSBTAG00000014834	ENSBTAG00000014834	A6H6X7_BOVIN	25:34960634-34968376	q1	q2	OK	0.78504	0.079695	-3.3002	9.85056	0.101517	3.36574	0.000763396	0.00131278	yes
ENSBTAG00000017204	ENSBTAG00000017204	-	3:12475180-12484872	q1	q2	NOTEST	0.198639	0.020181	-3.29908	9.84287	0.101596	2.00011	0.0454887	1	no
ENSBTAG00000019241	ENSBTAG00000019241	FGF11	19:27751728-27755716	q1	q2	OK	0.373724	0.0380511	-3.29596	9.82163	0.101816	2.13161	0.0330393	0.0471477	yes
ENSBTAG00000017504	ENSBTAG00000017504	FAIM2_BOVIN	5:30155762-30185025	q1	q2	NOTEST	0.27115	0.0276491	-3.29378	9.80683	0.10197	1.99611	0.0459219	1	no
ENSBTAG00000046580	ENSBTAG00000046580	Q5E9G8_BOVIN	19:42877796-42888179	q1	q2	OK	2.93334	0.299148	-3.29362	9.80565	0.101982	10.1786	0	0	yes
ENSBTAG00000006703	ENSBTAG00000006703	PD2R_BOVIN	10:45205472-45212956	q1	q2	NOTEST	0.038665	0.00394866	-3.29159	9.79193	0.102125	0.887363	0.374884	1	no
ENSBTAG00000002096	ENSBTAG00000002096	Q2KI63_BOVIN	3:7996518-8005228	q1	q2	NOTEST	0.279862	0.0286225	-3.28949	9.77769	0.102274	1.93153	0.053418	1	no
ENSBTAG00000037687	ENSBTAG00000037687	GPR111	23:20708928-20732784	q1	q2	OK	0.51546	0.052729	-3.28919	9.77565	0.102295	4.10664	4.01456e-05	7.78877e-05	yes
ENSBTAG00000015818	ENSBTAG00000015818	MMP1	15:6132914-6141309	q1	q2	OK	3.877	0.397275	-3.28673	9.75898	0.10247	9.8514	0	0	yes
ENSBTAG00000004145	ENSBTAG00000004145	ANO4_BOVIN	5:65012099-65361829	q1	q2	NOTEST	0.208515	0.0214155	-3.28342	9.73664	0.102705	3.13203	0.00173603	1	no
ENSBTAG00000000575	ENSBTAG00000000575	TNC	8:105965497-106067887	q1	q2	OK	1.49063	0.153293	-3.28156	9.72406	0.102838	12.2771	0	0	yes
ENSBTAG00000047599	ENSBTAG00000047599	Q9TUJ0_BOVIN	4:65793128-65809031	q1	q2	OK	1.24345	0.128145	-3.2785	9.70346	0.103056	6.29086	3.15721e-10	8.69651e-10	yes
ENSBTAG00000001947	ENSBTAG00000001947	A8QQJ5_BOVIN	11:1934699-1943563	q1	q2	OK	0.854868	0.0881328	-3.27795	9.69977	0.103095	5.16118	2.45399e-07	5.6283e-07	yes
ENSBTAG00000018746	ENSBTAG00000018746	A8E661_BOVIN	2:91475504-91548842	q1	q2	OK	6.6985	0.691804	-3.2754	9.68266	0.103278	21.8493	0	0	yes
ENSBTAG00000045754	ENSBTAG00000045754	LOC100302586	16:50553086-50556851	q1	q2	OK	52.181	5.39977	-3.27255	9.66356	0.103482	26.6187	0	0	yes
ENSBTAG00000037856	ENSBTAG00000037856	MGC152281	11:10196558-10203502	q1	q2	OK	6.68098	0.692875	-3.26939	9.6424	0.103709	13.9703	0	0	yes
ENSBTAG00000000936	ENSBTAG00000000936	SLC39A2	10:26150710-26153125	q1	q2	OK	0.621784	0.0645457	-3.26802	9.63324	0.103807	2.88781	0.0038793	0.00619074	yes
ENSBTAG00000020032	ENSBTAG00000020032	KIAA1377	15:7021792-7089556	q1	q2	OK	0.644211	0.0668806	-3.26788	9.63226	0.103817	5.29784	1.17182e-07	2.74528e-07	yes
ENSBTAG00000019254	ENSBTAG00000019254	C9orf171	11:102520239-102652701	q1	q2	OK	0.458081	0.0475633	-3.26768	9.63098	0.103832	2.14748	0.0317548	0.0454462	yes
ENSBTAG00000016210	ENSBTAG00000016210	LYPD2	14:2829284-2831334	q1	q2	OK	3.59678	0.373861	-3.26613	9.62063	0.103943	4.38718	1.14832e-05	2.33249e-05	yes
ENSBTAG00000015979	ENSBTAG00000015979	SEZ6	19:20879076-20927187	q1	q2	OK	2.90029	0.302135	-3.26293	9.59932	0.104174	13.4786	0	0	yes
ENSBTAG00000013588	ENSBTAG00000013588	ZNF532	24:58491690-58551186	q1	q2	OK	0.498045	0.0518995	-3.26248	9.59634	0.104207	5.32968	9.83833e-08	2.31721e-07	yes
ENSBTAG00000013942	ENSBTAG00000013942	DAGLA	29:40857730-40883995	q1	q2	OK	4.57209	0.477083	-3.26054	9.58343	0.104347	14.5864	0	0	yes
ENSBTAG00000001785	ENSBTAG00000001785	TGM3	13:53261634-53304213	q1	q2	OK	19.8105	2.06957	-3.25887	9.57228	0.104468	25.7794	0	0	yes
ENSBTAG00000021205	ENSBTAG00000021205	Q08DF9_BOVIN	11:101502264-101517588	q1	q2	OK	3.0231	0.315883	-3.25857	9.57032	0.10449	9.12717	0	0	yes
ENSBTAG00000011780	ENSBTAG00000011780	SLITRK4	X:26731210-26733724	q1	q2	NOTEST	0.159653	0.0167113	-3.25605	9.5536	0.104672	2.0576	0.039629	1	no
ENSBTAG00000008735	ENSBTAG00000008735	VASH1	10:89026340-89044338	q1	q2	OK	0.986264	0.103252	-3.25581	9.55201	0.10469	3.88572	0.000102027	0.000190626	yes
ENSBTAG00000020665	ENSBTAG00000020665	GFRA2	8:69500591-69604707	q1	q2	OK	0.494787	0.0518352	-3.2548	9.54539	0.104763	3.57995	0.000343664	0.000611208	yes
ENSBTAG00000020893	ENSBTAG00000020893	MATN3	11:78889150-78907349	q1	q2	OK	0.817166	0.0861322	-3.24601	9.48735	0.105403	4.06924	4.71662e-05	9.09663e-05	yes
ENSBTAG00000012772	ENSBTAG00000012772	GFI1B	11:102967046-103099918	q1	q2	OK	2.16294	0.228039	-3.24564	9.48496	0.10543	5.39503	6.85139e-08	1.63142e-07	yes
ENSBTAG00000011186	ENSBTAG00000011186	A1A4I7_BOVIN	29:41162551-41172395	q1	q2	OK	2.85122	0.301781	-3.24001	9.44798	0.105842	12.6456	0	0	yes
ENSBTAG00000030333	ENSBTAG00000030333	E1BC10_BOVIN	19:43514250-43544945	q1	q2	OK	0.710539	0.0752469	-3.23921	9.44277	0.105901	5.69199	1.25564e-08	3.13342e-08	yes
ENSBTAG00000036442	ENSBTAG00000036442	-	22:42636103-42636210	q1	q2	OK	8.31066	0.880186	-3.23908	9.44194	0.105911	0.198526	0.842633	0.876308	no
ENSBTAG00000002258	ENSBTAG00000002258	APOA1_BOVIN	15:27932199-27934085	q1	q2	OK	0.732195	0.077624	-3.23765	9.43259	0.106016	2.83427	0.00459311	0.00727138	yes
ENSBTAG00000034064	ENSBTAG00000034064	Q2T9P7_BOVIN	X:118633279-118636998	q1	q2	OK	3.21048	0.340691	-3.23625	9.42344	0.106119	7.95686	1.77636e-15	6.33723e-15	yes
ENSBTAG00000045690	ENSBTAG00000045690	-	27:41055699-41056080	q1	q2	OK	0.366462	0.0389089	-3.23549	9.41846	0.106175	0.532484	0.594391	0.655296	no
ENSBTAG00000022917	ENSBTAG00000022917	FANK1	26:45731305-45840708	q1	q2	OK	1.81394	0.192793	-3.234	9.40874	0.106284	5.63949	1.70556e-08	4.22121e-08	yes
ENSBTAG00000047676	ENSBTAG00000047676	PRODH	17:74425041-74490537	q1	q2	OK	40.9472	4.36119	-3.23097	9.389	0.106508	27.3267	0	0	yes
ENSBTAG00000011734	ENSBTAG00000011734	ANKR1_BOVIN	26:12571208-12580580	q1	q2	OK	275.316	29.3534	-3.22948	9.37936	0.106618	43.1395	0	0	yes
ENSBTAG00000015330	ENSBTAG00000015330	-	2:34487843-34571758	q1	q2	OK	1.69444	0.180747	-3.22876	9.37465	0.106671	7.52489	5.28466e-14	1.75917e-13	yes
ENSBTAG00000008783	ENSBTAG00000008783	HTR7	26:12376624-12513781	q1	q2	NOTEST	0.216703	0.0231954	-3.22381	9.3425	0.107038	2.12253	0.0337932	1	no
ENSBTAG00000000776	ENSBTAG00000000776	-	29:48988148-48989096	q1	q2	OK	1.36666	0.146582	-3.22088	9.32352	0.107255	4.03296	5.50793e-05	0.000105552	yes
ENSBTAG00000019517	ENSBTAG00000019517	ELN	25:33787888-33820672	q1	q2	NOTEST	0.21253	0.0227949	-3.22088	9.32358	0.107255	2.45455	0.0141061	1	no
ENSBTAG00000003020	ENSBTAG00000003020	SRCRB4D	25:34930216-34940479	q1	q2	NOTEST	0.26332	0.0282673	-3.21961	9.31536	0.10735	2.30726	0.0210403	1	no
ENSBTAG00000017216	ENSBTAG00000017216	FRMD5	21:56048991-56091578	q1	q2	OK	0.450414	0.0486326	-3.21126	9.26157	0.107973	2.96365	0.00304014	0.00490693	yes
ENSBTAG00000045701	ENSBTAG00000045701	OPRL1	13:54254092-54255011	q1	q2	OK	1.44024	0.1558	-3.20855	9.24416	0.108176	3.56213	0.000367852	0.000652515	yes
ENSBTAG00000019378	ENSBTAG00000019378	KIAA1755	13:67749212-67774628	q1	q2	OK	0.709584	0.0767738	-3.20829	9.24253	0.108195	6.02494	1.69173e-09	4.45829e-09	yes
ENSBTAG00000017056	ENSBTAG00000017056	Q1JPG7_BOVIN	3:15399754-15408994	q1	q2	OK	5.30117	0.574636	-3.20559	9.22527	0.108398	15.3111	0	0	yes
ENSBTAG00000024381	ENSBTAG00000024381	MAN1A1	9:32093590-32262873	q1	q2	OK	28.2662	3.07327	-3.20123	9.19743	0.108726	27.5009	0	0	yes
ENSBTAG00000015313	ENSBTAG00000015313	Q0VC04_BOVIN	18:52849303-52867674	q1	q2	OK	0.305441	0.0332302	-3.20032	9.19167	0.108795	2.64523	0.00816354	0.0125726	yes
ENSBTAG00000019741	ENSBTAG00000019741	A4IFF5_BOVIN	5:102025880-102035208	q1	q2	NOTEST	0.20431	0.022285	-3.19662	9.16805	0.109074	3.05603	0.00224287	1	no
ENSBTAG00000003675	ENSBTAG00000003675	F1MEV6_BOVIN	7:12610667-12658973	q1	q2	OK	13.321	1.45309	-3.1965	9.16736	0.109083	32.5928	0	0	yes
ENSBTAG00000008056	ENSBTAG00000008056	F1N6X2_BOVIN	13:26937413-26999001	q1	q2	OK	0.479611	0.0523429	-3.1958	9.16287	0.109136	3.21351	0.00131125	0.00220139	yes
ENSBTAG00000001204	ENSBTAG00000001204	K1462_BOVIN	13:35331912-35368126	q1	q2	OK	7.30411	0.797375	-3.19538	9.16019	0.109168	21.9185	0	0	yes
ENSBTAG00000038974	ENSBTAG00000038974	STMN3_BOVIN	13:54550375-54560121	q1	q2	OK	0.307248	0.0335631	-3.19446	9.15434	0.109237	3.19647	0.00139119	0.00232647	yes
ENSBTAG00000021019	ENSBTAG00000021019	ZNT4_BOVIN	10:65176254-65202411	q1	q2	OK	1.37179	0.149888	-3.1941	9.1521	0.109265	5.86145	4.58838e-09	1.17679e-08	yes
ENSBTAG00000017214	ENSBTAG00000017214	-	2:5512931-5514784	q1	q2	OK	1.51203	0.165434	-3.19217	9.13978	0.109411	3.05025	0.00228651	0.00374102	yes
ENSBTAG00000020155	ENSBTAG00000020155	RP1L1	8:8508959-8518765	q1	q2	NOTEST	0.0443139	0.00486109	-3.18841	9.11604	0.109697	1.6128	0.106788	1	no
ENSBTAG00000033222	ENSBTAG00000033222	CALR3	7:6450961-6476687	q1	q2	OK	26.2853	2.88584	-3.18719	9.10837	0.109789	22.7282	0	0	yes
ENSBTAG00000026748	ENSBTAG00000026748	GGLO_BOVIN	8:75984695-76010699	q1	q2	NOTEST	0.252391	0.0277408	-3.18558	9.09819	0.109912	2.69554	0.00702752	1	no
ENSBTAG00000006620	ENSBTAG00000006620	SLC24A4	21:57596460-57783306	q1	q2	NOTEST	0.149301	0.0164122	-3.18538	9.09695	0.109927	1.98249	0.0474249	1	no
ENSBTAG00000022244	ENSBTAG00000022244	-	29:45230681-45242282	q1	q2	OK	1.39636	0.15387	-3.18189	9.07493	0.110193	7.47307	7.83817e-14	2.58277e-13	yes
ENSBTAG00000004212	ENSBTAG00000004212	F1MSX6_BOVIN	29:48876964-48914063	q1	q2	NOTEST	0.26598	0.0293191	-3.1814	9.0719	0.110231	1.61405	0.106516	1	no
ENSBTAG00000002914	ENSBTAG00000002914	Q0IIK7_BOVIN	15:41624350-41980708	q1	q2	OK	4.4029	0.486483	-3.17799	9.05047	0.110492	12.0468	0	0	yes
ENSBTAG00000047643	ENSBTAG00000047643	C27H8orf48	27:22499289-22500766	q1	q2	OK	2.57566	0.284766	-3.1771	9.04483	0.11056	7.2587	3.90799e-13	1.24706e-12	yes
ENSBTAG00000021313	ENSBTAG00000021313	RUN3B_BOVIN	4:32691261-32858257	q1	q2	OK	1.33831	0.147977	-3.17696	9.04404	0.110571	8.53953	0	0	yes
ENSBTAG00000047316	ENSBTAG00000047316	-	25:3713888-3736115	q1	q2	OK	0.527904	0.0586628	-3.16976	8.99896	0.111124	2.84244	0.00447691	0.00709709	yes
ENSBTAG00000037257	ENSBTAG00000037257	-	23:51917536-52015377	q1	q2	OK	65.5174	7.28446	-3.16898	8.99413	0.111184	0.344551	0.730432	0.780881	no
ENSBTAG00000020127	ENSBTAG00000020127	TKTL1_BOVIN	X:40263163-40291627	q1	q2	NOTEST	0.0993664	0.0110588	-3.16757	8.98528	0.111293	1.91307	0.0557389	1	no
ENSBTAG00000010899	ENSBTAG00000010899	Q862B8_BOVIN	19:54079296-54131052	q1	q2	OK	683.123	76.0484	-3.16716	8.98274	0.111324	43.4069	0	0	yes
ENSBTAG00000012216	ENSBTAG00000012216	MLKL	18:2160855-2177621	q1	q2	OK	4.79534	0.536673	-3.15952	8.93531	0.111915	9.81963	0	0	yes
ENSBTAG00000014614	ENSBTAG00000014614	ACTA_BOVIN	26:10662361-10748014	q1	q2	OK	70.9845	7.9552	-3.15753	8.92303	0.11207	35.6848	0	0	yes
ENSBTAG00000012228	ENSBTAG00000012228	SEMA4A	3:14659268-14679216	q1	q2	OK	2.58459	0.289835	-3.15663	8.91745	0.11214	10.7614	0	0	yes
ENSBTAG00000008513	ENSBTAG00000008513	C1orf186	16:3695811-3699320	q1	q2	OK	0.691142	0.0775339	-3.15608	8.91406	0.112183	1.90491	0.0567913	0.0783016	no
ENSBTAG00000013766	ENSBTAG00000013766	IRGC	18:52261041-52264944	q1	q2	OK	0.923968	0.103898	-3.15267	8.89303	0.112448	4.26615	1.98875e-05	3.96094e-05	yes
ENSBTAG00000014412	ENSBTAG00000014412	ELAVL3	7:17051781-17059767	q1	q2	OK	0.379773	0.042715	-3.15232	8.89086	0.112475	1.98733	0.0468859	0.06546	no
ENSBTAG00000019250	ENSBTAG00000019250	Q3ZC95_BOVIN	X:55171774-55205681	q1	q2	NOTEST	0.101842	0.0114548	-3.1523	8.89077	0.112477	1.9574	0.0503	1	no
ENSBTAG00000003835	ENSBTAG00000003835	BMP4_BOVIN	10:66751295-66755026	q1	q2	OK	2.72005	0.306258	-3.15081	8.88156	0.112593	7.99687	1.33227e-15	4.77281e-15	yes
ENSBTAG00000010188	ENSBTAG00000010188	RDH8_BOVIN	7:15815878-15822349	q1	q2	NOTEST	0.25768	0.0290328	-3.14982	8.87548	0.11267	2.38776	0.0169512	1	no
ENSBTAG00000039664	ENSBTAG00000039664	-	22:49660684-49661474	q1	q2	OK	16.2039	1.82634	-3.14932	8.87233	0.112709	12.2995	0	0	yes
ENSBTAG00000037673	ENSBTAG00000037673	A1A4L7_BOVIN	3:33874018-33880598	q1	q2	OK	5.56034	0.626811	-3.14907	8.87084	0.112729	9.01992	0	0	yes
ENSBTAG00000009331	ENSBTAG00000009331	CPAMD8	7:5995887-6095676	q1	q2	NOTEST	0.0435814	0.00491479	-3.14851	8.8674	0.112773	1.89878	0.0575932	1	no
ENSBTAG00000034849	ENSBTAG00000034849	-	6:9049870-9050251	q1	q2	NOTEST	0.205567	0.0232004	-3.14739	8.86049	0.11286	0.307963	0.75811	1	no
ENSBTAG00000047148	ENSBTAG00000047148	CNKSR1	2:127502996-127504663	q1	q2	OK	0.32755	0.0370463	-3.14431	8.84164	0.113102	1.6443	0.100114	0.133147	no
ENSBTAG00000007693	ENSBTAG00000007693	SLC45A3	16:3244644-3250256	q1	q2	OK	4.74222	0.536493	-3.14393	8.8393	0.113131	10.4207	0	0	yes
ENSBTAG00000021743	ENSBTAG00000021743	ZNF704	14:45995144-46040760	q1	q2	OK	1.23034	0.139655	-3.13912	8.80985	0.113509	4.32952	1.49434e-05	3.01053e-05	yes
ENSBTAG00000013532	ENSBTAG00000013532	F187A_BOVIN	19:45239327-45240593	q1	q2	NOTEST	0.25034	0.0284838	-3.13567	8.78886	0.113781	1.56503	0.117575	1	no
ENSBTAG00000046336	ENSBTAG00000046336	-	7:17253184-17254000	q1	q2	OK	0.44803	0.0509856	-3.13543	8.78738	0.1138	1.61565	0.10617	0.14042	no
ENSBTAG00000034437	ENSBTAG00000034437	-	X:119164232-119165237	q1	q2	OK	4.68297	0.533091	-3.13497	8.78456	0.113836	7.61749	2.57572e-14	8.69151e-14	yes
ENSBTAG00000046828	ENSBTAG00000046828	-	21:71011579-71016820	q1	q2	OK	26.6921	3.03861	-3.13493	8.78431	0.113839	18.155	0	0	yes
ENSBTAG00000044208	ENSBTAG00000044208	DUSP4	27:24815380-24828237	q1	q2	OK	2.07213	0.235993	-3.1343	8.78047	0.113889	5.80997	6.24844e-09	1.58803e-08	yes
ENSBTAG00000009834	ENSBTAG00000009834	CNGA3_BOVIN	11:3553256-3590989	q1	q2	OK	0.758409	0.0864535	-3.13298	8.77245	0.113993	6.67619	2.45228e-11	7.16869e-11	yes
ENSBTAG00000037844	ENSBTAG00000037844	CAD18_BOVIN	20:53409875-54014021	q1	q2	OK	1.34451	0.153347	-3.13221	8.76776	0.114054	7.70215	1.33227e-14	4.56569e-14	yes
ENSBTAG00000019230	ENSBTAG00000019230	PE2R3_BOVIN	3:74488313-74530201	q1	q2	OK	1.20843	0.137952	-3.1309	8.75979	0.114158	4.15966	3.18715e-05	6.23179e-05	yes
ENSBTAG00000046054	ENSBTAG00000046054	RHOB_BOVIN	11:78464205-78466417	q1	q2	OK	393.435	44.9494	-3.12975	8.75284	0.114249	41.6196	0	0	yes
ENSBTAG00000047598	ENSBTAG00000047598	-	8:60381929-60388553	q1	q2	OK	9.1083	1.04158	-3.12841	8.7447	0.114355	13.9265	0	0	yes
ENSBTAG00000014863	ENSBTAG00000014863	GYPC	2:79255848-79304396	q1	q2	OK	0.933232	0.106837	-3.12682	8.7351	0.114481	3.17793	0.0014833	0.00247439	yes
ENSBTAG00000008066	ENSBTAG00000008066	PKDREJ	5:117677521-117738845	q1	q2	NOTEST	0.167251	0.0191539	-3.12631	8.73196	0.114521	3.82222	0.000132254	1	no
ENSBTAG00000012851	ENSBTAG00000012851	F1MD24_BOVIN	17:72690557-72740066	q1	q2	OK	0.416018	0.047688	-3.12495	8.72375	0.114629	3.50463	0.000457246	0.000804595	yes
ENSBTAG00000047055	ENSBTAG00000047055	-	19:62593649-62654740	q1	q2	OK	0.708716	0.0812417	-3.12492	8.72355	0.114632	4.09398	4.24026e-05	8.211e-05	yes
ENSBTAG00000009650	ENSBTAG00000009650	OTOF	11:72995880-73082885	q1	q2	NOTEST	0.162903	0.0186828	-3.12423	8.71941	0.114687	3.86287	0.000112065	1	no
ENSBTAG00000043992	ENSBTAG00000043992	RNF180	20:15075232-15320360	q1	q2	OK	0.570723	0.0654581	-3.12415	8.71891	0.114693	3.69014	0.00022413	0.000405669	yes
ENSBTAG00000009296	ENSBTAG00000009296	SLC26A5	4:44826225-44862357	q1	q2	NOTEST	0.227912	0.0261906	-3.12135	8.70205	0.114916	1.93695	0.0527519	1	no
ENSBTAG00000009148	ENSBTAG00000009148	GPA33	3:1726503-1779667	q1	q2	OK	0.481037	0.055361	-3.11921	8.6891	0.115086	2.5616	0.0104191	0.0158409	yes
ENSBTAG00000044192	ENSBTAG00000044192	MAF	18:6551585-6552719	q1	q2	OK	2.03933	0.235149	-3.11645	8.6725	0.115307	5.10732	3.26764e-07	7.42846e-07	yes
ENSBTAG00000037768	ENSBTAG00000037768	-	15:6007067-6034291	q1	q2	OK	0.755129	0.0871621	-3.11495	8.6635	0.115427	4.61277	3.97328e-06	8.35108e-06	yes
ENSBTAG00000004799	ENSBTAG00000004799	DENND2A	4:104715529-104781684	q1	q2	NOTEST	0.280111	0.0323612	-3.11366	8.65577	0.11553	2.82615	0.00471115	1	no
ENSBTAG00000000020	ENSBTAG00000000020	TRPV3	19:24854532-24885437	q1	q2	NOTEST	0.277284	0.0320442	-3.11323	8.65317	0.115564	3.05297	0.00226589	1	no
ENSBTAG00000008253	ENSBTAG00000008253	EXPH5	15:18459439-18494061	q1	q2	NOTEST	0.200674	0.0231928	-3.11311	8.65243	0.115574	4.13773	3.50757e-05	1	no
ENSBTAG00000046068	ENSBTAG00000046068	-	9:29703281-29703781	q1	q2	NOTEST	0.191139	0.0221227	-3.11103	8.63995	0.115741	0.485102	0.627604	1	no
ENSBTAG00000046865	ENSBTAG00000046865	-	7:19206049-19212080	q1	q2	OK	10.157	1.17572	-3.11086	8.63896	0.115754	5.27535	1.32503e-07	3.09174e-07	yes
ENSBTAG00000004650	ENSBTAG00000004650	ZNF516	24:2858678-2910274	q1	q2	OK	4.0677	0.471076	-3.11018	8.63491	0.115809	14.176	0	0	yes
ENSBTAG00000002702	ENSBTAG00000002702	TSPAN32	29:49879042-49926003	q1	q2	OK	0.941415	0.109059	-3.10972	8.63216	0.115846	2.60858	0.00909177	0.0139087	yes
ENSBTAG00000019940	ENSBTAG00000019940	RASGRF1	21:25714964-25816371	q1	q2	OK	5.05479	0.585699	-3.10942	8.63035	0.11587	16.9134	0	0	yes
ENSBTAG00000014540	ENSBTAG00000014540	CA170_BOVIN	16:52742636-52748240	q1	q2	OK	1.37789	0.15969	-3.10911	8.62853	0.115895	9.00807	0	0	yes
ENSBTAG00000015368	ENSBTAG00000015368	Q3T008_BOVIN	19:9697826-9707120	q1	q2	OK	25.0938	2.90965	-3.10842	8.62434	0.11595	21.4291	0	0	yes
ENSBTAG00000018143	ENSBTAG00000018143	SARG_BOVIN	16:4686517-4697039	q1	q2	OK	11.7055	1.35991	-3.10561	8.60755	0.116176	18.2505	0	0	yes
ENSBTAG00000047560	ENSBTAG00000047560	C2CD4C	7:44716585-44717848	q1	q2	OK	3.15634	0.366709	-3.10554	8.60721	0.116182	7.31483	2.57794e-13	8.30125e-13	yes
ENSBTAG00000002369	ENSBTAG00000002369	Q32LD5_BOVIN	23:11093688-11132861	q1	q2	NOTEST	0.239588	0.0278541	-3.10459	8.60153	0.116259	1.86675	0.061937	1	no
ENSBTAG00000013529	ENSBTAG00000013529	CCDC103	19:45233933-45237988	q1	q2	OK	3.90167	0.453708	-3.10425	8.59952	0.116286	5.17096	2.32896e-07	5.35179e-07	yes
ENSBTAG00000046096	ENSBTAG00000046096	-	23:31112602-31113572	q1	q2	OK	2.91403	0.33976	-3.10042	8.57673	0.116595	1.70141	0.0888668	0.119173	no
ENSBTAG00000014560	ENSBTAG00000014560	HLX_BOVIN	16:25059260-25064940	q1	q2	OK	0.308143	0.0359335	-3.1002	8.57537	0.116613	2.68754	0.00719805	0.0111692	yes
ENSBTAG00000006937	ENSBTAG00000006937	F1MRL3_BOVIN	19:61959365-62008054	q1	q2	OK	0.819665	0.0956688	-3.09891	8.56774	0.116717	7.83367	4.66294e-15	1.63133e-14	yes
ENSBTAG00000006762	ENSBTAG00000006762	A4IFR5_BOVIN	7:59136027-59267638	q1	q2	OK	0.549935	0.064446	-3.0931	8.53327	0.117188	4.4274	9.53768e-06	1.9463e-05	yes
ENSBTAG00000014053	ENSBTAG00000014053	Q2YDJ7_BOVIN	23:45207835-45258409	q1	q2	OK	6.68597	0.784296	-3.09167	8.5248	0.117304	13.979	0	0	yes
ENSBTAG00000017576	ENSBTAG00000017576	GPR144	11:95484104-95508348	q1	q2	NOTEST	0.117685	0.0138078	-3.09138	8.52308	0.117328	1.94879	0.0513199	1	no
ENSBTAG00000039049	ENSBTAG00000039049	RAI2	X:132948150-132949722	q1	q2	OK	2.97045	0.349234	-3.08842	8.50562	0.117569	8.08586	6.66134e-16	2.41512e-15	yes
ENSBTAG00000001870	ENSBTAG00000001870	CPNE6_BOVIN	10:20896404-20901462	q1	q2	OK	3.67278	0.431928	-3.08801	8.50322	0.117602	10.0296	0	0	yes
ENSBTAG00000039444	ENSBTAG00000039444	-	9:85813502-85814535	q1	q2	OK	0.297072	0.0349418	-3.08779	8.50191	0.11762	1.19095	0.233675	0.287812	no
ENSBTAG00000002912	ENSBTAG00000002912	INHBA_BOVIN	4:79986253-79997754	q1	q2	OK	3.18926	0.375424	-3.08663	8.49509	0.117715	8.6832	0	0	yes
ENSBTAG00000009223	ENSBTAG00000009223	1433S_BOVIN	2:126929534-126930878	q1	q2	OK	10.9966	1.29587	-3.08506	8.48588	0.117843	14.1113	0	0	yes
ENSBTAG00000010444	ENSBTAG00000010444	A6QR62_BOVIN	5:57539932-57560884	q1	q2	OK	13.1227	1.54837	-3.08324	8.47517	0.117992	28.6656	0	0	yes
ENSBTAG00000030296	ENSBTAG00000030296	LCNL1	11:106244290-106246501	q1	q2	OK	0.661843	0.0781519	-3.08214	8.46867	0.118082	1.94227	0.052105	0.0722629	no
ENSBTAG00000009070	ENSBTAG00000009070	NPFFR2	6:89052209-89059348	q1	q2	NOTEST	0.245809	0.0290273	-3.08206	8.4682	0.118088	1.57133	0.116105	1	no
ENSBTAG00000010877	ENSBTAG00000010877	C6orf81	23:9683946-9694015	q1	q2	OK	1.35599	0.160378	-3.0798	8.45496	0.118274	4.24364	2.1992e-05	4.36406e-05	yes
ENSBTAG00000006453	ENSBTAG00000006453	CD3G_BOVIN	15:29462575-29469747	q1	q2	OK	1.9164	0.226942	-3.078	8.44445	0.118421	3.37301	0.000743513	0.00128062	yes
ENSBTAG00000003836	ENSBTAG00000003836	ADAM19	7:71158811-71250704	q1	q2	NOTEST	0.0883275	0.0104698	-3.07663	8.43641	0.118534	2.60008	0.00932027	1	no
ENSBTAG00000011854	ENSBTAG00000011854	S38A5_BOVIN	X:91662211-91670317	q1	q2	NOTEST	0.250851	0.0297549	-3.07563	8.43058	0.118616	1.97362	0.048425	1	no
ENSBTAG00000004775	ENSBTAG00000004775	GRIA2	17:42761043-42947091	q1	q2	NOTEST	0.0117659	0.00139603	-3.07521	8.42811	0.11865	0.517878	0.604543	1	no
ENSBTAG00000002661	ENSBTAG00000002661	ISLR2	21:34950165-34952418	q1	q2	NOTEST	0.119065	0.0141332	-3.0746	8.42449	0.118701	2.01345	0.0440675	1	no
ENSBTAG00000048122	ENSBTAG00000048122	CFAD_BOVIN	7:45030309-45032845	q1	q2	OK	1.70267	0.202124	-3.07449	8.42389	0.11871	4.18004	2.91463e-05	5.72026e-05	yes
ENSBTAG00000036102	ENSBTAG00000036102	-	7:70691094-70731179	q1	q2	OK	8.09813	0.961509	-3.07422	8.42231	0.118732	10.2942	0	0	yes
ENSBTAG00000017260	ENSBTAG00000017260	PDE3A	5:89554511-89620721	q1	q2	OK	1.30704	0.155272	-3.07344	8.41774	0.118796	6.85663	7.05036e-12	2.11147e-11	yes
ENSBTAG00000018497	ENSBTAG00000018497	Q17QZ6_BOVIN	2:80858086-80871118	q1	q2	OK	3.9859	0.473676	-3.07293	8.41482	0.118838	13.3222	0	0	yes
ENSBTAG00000014829	ENSBTAG00000014829	C5H12orf28	5:43746463-43872342	q1	q2	OK	0.422592	0.050301	-3.07061	8.40126	0.119029	4.66202	3.13125e-06	6.64049e-06	yes
ENSBTAG00000017305	ENSBTAG00000017305	O77624_BOVIN	17:73920710-73935352	q1	q2	OK	0.588788	0.0702335	-3.06752	8.38329	0.119285	1.55806	0.119218	0.156193	no
ENSBTAG00000016148	ENSBTAG00000016148	E1B9S4_BOVIN	11:106405781-106411025	q1	q2	OK	3.70617	0.443048	-3.06439	8.36517	0.119544	4.55669	5.19653e-06	1.08242e-05	yes
ENSBTAG00000001335	ENSBTAG00000001335	GHR	20:31890735-32199996	q1	q2	OK	0.680532	0.0813924	-3.0637	8.36112	0.119601	3.93884	8.18767e-05	0.000154665	yes
ENSBTAG00000014111	ENSBTAG00000014111	INPP4B	17:15722309-16066444	q1	q2	NOTEST	0.111505	0.0133407	-3.0632	8.35826	0.119642	1.47343	0.140634	1	no
ENSBTAG00000009510	ENSBTAG00000009510	ADA2B_BOVIN	11:2221055-2222399	q1	q2	NOTEST	0.226614	0.0271196	-3.06283	8.3561	0.119673	1.5602	0.118712	1	no
ENSBTAG00000012261	ENSBTAG00000012261	RAB19_BOVIN	4:104631511-104644646	q1	q2	OK	0.384724	0.0460721	-3.06186	8.35048	0.119754	3.06791	0.00215563	0.00353648	yes
ENSBTAG00000046158	ENSBTAG00000046158	CFAB_BOVIN	23:27225269-27231292	q1	q2	OK	3.78439	0.453199	-3.06184	8.35039	0.119755	11.6024	0	0	yes
ENSBTAG00000008906	ENSBTAG00000008906	A1A4P3_BOVIN	7:17700403-17701870	q1	q2	OK	2.05654	0.246286	-3.06181	8.35021	0.119758	2.77967	0.00544149	0.00854543	yes
ENSBTAG00000013004	ENSBTAG00000013004	ITIH5	13:16278274-16640879	q1	q2	NOTEST	0.114147	0.0136799	-3.06077	8.34414	0.119844	2.22144	0.0263213	1	no
ENSBTAG00000014940	ENSBTAG00000014940	KCNAB3	19:28214104-28220774	q1	q2	OK	1.41826	0.170207	-3.05876	8.33256	0.120011	7.10097	1.23879e-12	3.86732e-12	yes
ENSBTAG00000045498	ENSBTAG00000045498	SULT2B1	18:55660401-55697135	q1	q2	OK	7.24967	0.870054	-3.05874	8.33244	0.120013	9.79624	0	0	yes
ENSBTAG00000030757	ENSBTAG00000030757	-	25:41817961-41820367	q1	q2	OK	2.229	0.267998	-3.05611	8.31723	0.120232	8.87741	0	0	yes
ENSBTAG00000013536	ENSBTAG00000013536	P2RY11	7:15894541-15896884	q1	q2	OK	0.72615	0.0873464	-3.05545	8.31345	0.120287	3.46871	0.000522965	0.000914794	yes
ENSBTAG00000017031	ENSBTAG00000017031	C1orf173	3:70348756-70420435	q1	q2	NOTEST	0.237279	0.0286068	-3.05215	8.2945	0.120562	1.92724	0.0539501	1	no
ENSBTAG00000015984	ENSBTAG00000015984	CADM4	18:52178834-52183405	q1	q2	OK	20.105	2.42441	-3.05185	8.29274	0.120587	18.6951	0	0	yes
ENSBTAG00000011890	ENSBTAG00000011890	RSPH4A	9:34392164-34405193	q1	q2	NOTEST	0.110665	0.013376	-3.04848	8.2734	0.120869	1.83733	0.0661615	1	no
ENSBTAG00000012478	ENSBTAG00000012478	E1BIT6_BOVIN	19:28351722-28371440	q1	q2	OK	0.436415	0.0527501	-3.04846	8.27325	0.120871	2.7624	0.00573789	0.00898575	yes
ENSBTAG00000015108	ENSBTAG00000015108	USHBP1	7:5768516-5777534	q1	q2	OK	0.416004	0.0503227	-3.04732	8.26673	0.120967	3.7654	0.000166285	0.000304666	yes
ENSBTAG00000000585	ENSBTAG00000000585	LY66C_BOVIN	23:27407610-27410285	q1	q2	OK	6.77701	0.820949	-3.04528	8.25509	0.121138	8.56776	0	0	yes
ENSBTAG00000005868	ENSBTAG00000005868	HEBP1_BOVIN	5:97348104-97385488	q1	q2	OK	84.1183	10.2066	-3.04292	8.24156	0.121336	28.6626	0	0	yes
ENSBTAG00000009153	ENSBTAG00000009153	MLXIPL	25:34125793-34143852	q1	q2	OK	0.387439	0.0470916	-3.04043	8.22735	0.121546	3.84229	0.000121893	0.000225849	yes
ENSBTAG00000017273	ENSBTAG00000017273	A2VE93_BOVIN	7:4704032-4708458	q1	q2	OK	2.79603	0.339942	-3.04002	8.22502	0.12158	7.13712	9.53015e-13	2.98952e-12	yes
ENSBTAG00000038407	ENSBTAG00000038407	-	5:100719637-100720427	q1	q2	OK	24.3562	2.96128	-3.04	8.22489	0.121582	15.0343	0	0	yes
ENSBTAG00000031383	ENSBTAG00000031383	C19orf77	7:21661201-21664616	q1	q2	OK	4.68391	0.569581	-3.03974	8.22343	0.121604	8.8191	0	0	yes
ENSBTAG00000001244	ENSBTAG00000001244	TPA_BOVIN	27:36738832-36762837	q1	q2	OK	376.754	45.8423	-3.03887	8.21848	0.121677	40.0948	0	0	yes
ENSBTAG00000001206	ENSBTAG00000001206	F1MIA9_BOVIN	11:106397536-106399302	q1	q2	OK	0.632832	0.0773221	-3.03287	8.18436	0.122184	1.86683	0.061926	0.0849205	no
ENSBTAG00000025622	ENSBTAG00000025622	A5PK34_BOVIN	23:9237763-9263820	q1	q2	NOTEST	0.206518	0.0252791	-3.03025	8.16952	0.122406	2.54408	0.0109566	1	no
ENSBTAG00000014319	ENSBTAG00000014319	E1BA62_BOVIN	16:40118744-40472474	q1	q2	OK	5.34423	0.654242	-3.03009	8.16858	0.12242	11.8241	0	0	yes
ENSBTAG00000007336	ENSBTAG00000007336	HCST_BOVIN	18:46778206-46779500	q1	q2	OK	5.62413	0.689831	-3.02732	8.15291	0.122655	2.36015	0.0182677	0.0269404	yes
ENSBTAG00000047442	ENSBTAG00000047442	-	8:49499777-49516927	q1	q2	NOTEST	0.199831	0.0245466	-3.02518	8.14088	0.122837	1.57832	0.114493	1	no
ENSBTAG00000046258	ENSBTAG00000046258	SOX7	8:8401225-8405958	q1	q2	OK	0.395592	0.0486261	-3.02421	8.13538	0.12292	1.76792	0.0770739	0.104209	no
ENSBTAG00000020802	ENSBTAG00000020802	-	22:44235617-44376594	q1	q2	OK	2.59652	0.320355	-3.01883	8.10513	0.123379	20.4172	0	0	yes
ENSBTAG00000011882	ENSBTAG00000011882	SLC24A3	13:39202449-39632869	q1	q2	NOTEST	0.272355	0.0336533	-3.01667	8.09297	0.123564	2.23287	0.0255578	1	no
ENSBTAG00000046988	ENSBTAG00000046988	FAM43B	2:132691771-132692743	q1	q2	OK	1.11151	0.137526	-3.01474	8.08218	0.123729	3.63352	0.000279576	0.00050145	yes
ENSBTAG00000001163	ENSBTAG00000001163	Q1LZ92_BOVIN	28:26451330-26504095	q1	q2	OK	1.30216	0.161259	-3.01345	8.07496	0.12384	6.0442	1.5015e-09	3.96918e-09	yes
ENSBTAG00000009182	ENSBTAG00000009182	CLCN1	4:107518110-107554736	q1	q2	NOTEST	0.176446	0.0218604	-3.01284	8.07149	0.123892	2.55666	0.0105682	1	no
ENSBTAG00000047250	ENSBTAG00000047250	SSPTB_BOVIN	1:106878904-106879135	q1	q2	OK	12.8556	1.59415	-3.01154	8.06423	0.124004	2.96297	0.00304688	0.00491634	yes
ENSBTAG00000047870	ENSBTAG00000047870	-	19:9252859-9253795	q1	q2	NOTEST	0.144942	0.0179813	-3.0109	8.06071	0.124059	0.923879	0.355549	1	no
ENSBTAG00000046951	ENSBTAG00000046951	FGF17	8:69859520-69864355	q1	q2	OK	1.70224	0.212095	-3.00465	8.02584	0.124598	3.39759	0.000679823	0.00117703	yes
ENSBTAG00000017863	ENSBTAG00000017863	SRGN	28:25631916-25647735	q1	q2	OK	0.421065	0.0525054	-3.00351	8.01946	0.124696	2.0418	0.0411709	0.0579334	no
ENSBTAG00000046806	ENSBTAG00000046806	-	X:79982281-79984425	q1	q2	NOTEST	0.195315	0.0243764	-3.00224	8.01246	0.124806	0.136655	0.891303	1	no
ENSBTAG00000005647	ENSBTAG00000005647	GPR132	21:71077799-71078924	q1	q2	OK	6.62321	0.826797	-3.00193	8.01068	0.124833	9.86933	0	0	yes
ENSBTAG00000013250	ENSBTAG00000013250	A4IFR2_BOVIN	X:92018742-92023258	q1	q2	OK	0.402723	0.0502771	-3.00181	8.01007	0.124843	1.88377	0.0595962	0.0819259	no
ENSBTAG00000008877	ENSBTAG00000008877	APBA1	8:45865187-45949526	q1	q2	OK	0.320137	0.0399794	-3.00136	8.00755	0.124882	3.16632	0.00154382	0.00257062	yes
ENSBTAG00000027181	ENSBTAG00000027181	LAMA3	24:33072941-33324798	q1	q2	OK	0.340685	0.0426734	-2.99703	7.98354	0.125258	7.24902	4.19886e-13	1.33831e-12	yes
ENSBTAG00000039525	ENSBTAG00000039525	-	8:22932013-22932600	q1	q2	NOTEST	0.260127	0.0325924	-2.99661	7.98122	0.125294	0.874989	0.38158	1	no
ENSBTAG00000045746	ENSBTAG00000045746	-	5:115038840-115060319	q1	q2	NOTEST	0.244402	0.0306612	-2.99477	7.97105	0.125454	1.60299	0.108937	1	no
ENSBTAG00000014001	ENSBTAG00000014001	MAP1A	21:55810060-55829462	q1	q2	OK	4.37835	0.55031	-2.99207	7.95615	0.125689	23.1828	0	0	yes
ENSBTAG00000014252	ENSBTAG00000014252	SPTLC3	13:6743961-6879038	q1	q2	OK	0.62877	0.0791611	-2.98967	7.94292	0.125898	3.41588	0.000635762	0.00110297	yes
ENSBTAG00000021160	ENSBTAG00000021160	AP1M2_BOVIN	7:16302065-16312788	q1	q2	OK	4.00578	0.504416	-2.98939	7.94142	0.125923	9.67331	0	0	yes
ENSBTAG00000016891	ENSBTAG00000016891	TCP11	23:9020183-9052477	q1	q2	OK	0.762929	0.0960784	-2.98926	7.94069	0.125934	4.05539	5.005e-05	9.6368e-05	yes
ENSBTAG00000007449	ENSBTAG00000007449	Q0VCB5_BOVIN	6:111369913-111406680	q1	q2	OK	2.69877	0.340247	-2.98765	7.9318	0.126075	7.50949	5.92859e-14	1.96669e-13	yes
ENSBTAG00000008779	ENSBTAG00000008779	ALOX15B	19:28306790-28315515	q1	q2	OK	0.696168	0.0877933	-2.98725	7.92963	0.12611	3.7214	0.000198118	0.000360029	yes
ENSBTAG00000006452	ENSBTAG00000006452	CD3D_BOVIN	15:29456450-29460605	q1	q2	OK	0.474545	0.059858	-2.98693	7.92785	0.126138	3.0009	0.00269183	0.00437032	yes
ENSBTAG00000012692	ENSBTAG00000012692	F1MUX5_BOVIN	3:33837047-33846061	q1	q2	OK	1.71191	0.216069	-2.98604	7.92298	0.126215	4.80913	1.5159e-06	3.29161e-06	yes
ENSBTAG00000008100	ENSBTAG00000008100	Q0IID5_BOVIN	26:18858708-19013761	q1	q2	OK	0.54578	0.0688865	-2.98603	7.92289	0.126216	4.37766	1.19959e-05	2.43389e-05	yes
ENSBTAG00000021775	ENSBTAG00000021775	SLC4A9	7:53242015-53256016	q1	q2	OK	0.571828	0.0722065	-2.98538	7.91934	0.126273	5.13075	2.88585e-07	6.58627e-07	yes
ENSBTAG00000016734	ENSBTAG00000016734	E1BPM8_BOVIN	16:47669654-47677534	q1	q2	OK	0.49985	0.0631336	-2.98502	7.91734	0.126305	4.08358	4.43475e-05	8.57639e-05	yes
ENSBTAG00000017617	ENSBTAG00000017617	C6orf222	23:10228125-10240589	q1	q2	OK	0.839959	0.106176	-2.98386	7.91101	0.126406	4.7771	1.77845e-06	3.83826e-06	yes
ENSBTAG00000010069	ENSBTAG00000010069	Q17QJ4_BOVIN	7:51438726-51442500	q1	q2	OK	37.6679	4.76232	-2.9836	7.90957	0.126429	32.782	0	0	yes
ENSBTAG00000046556	ENSBTAG00000046556	SOX4	23:36292361-36293944	q1	q2	OK	135.153	17.0895	-2.9834	7.90854	0.126447	33.8799	0	0	yes
ENSBTAG00000018955	ENSBTAG00000018955	-	12:25231842-25324738	q1	q2	OK	0.301734	0.0382244	-2.98071	7.89375	0.126683	2.22399	0.0261489	0.0378294	yes
ENSBTAG00000038490	ENSBTAG00000038490	CLEC4A	5:102076230-102089108	q1	q2	NOTEST	0.208164	0.0263963	-2.97931	7.88611	0.126806	1.86718	0.0618761	1	no
ENSBTAG00000004674	ENSBTAG00000004674	3HAO_BOVIN	11:25187251-25201563	q1	q2	OK	0.411169	0.0521909	-2.97786	7.87817	0.126933	2.25335	0.0242368	0.0352355	yes
ENSBTAG00000015604	ENSBTAG00000015604	Q08DL3_BOVIN	5:25807925-25823618	q1	q2	OK	28.6722	3.64301	-2.97645	7.87047	0.127057	27.3878	0	0	yes
ENSBTAG00000016876	ENSBTAG00000016876	-	5:89323085-89391585	q1	q2	OK	24.7342	3.1491	-2.97349	7.85437	0.127318	12.748	0	0	yes
ENSBTAG00000048125	ENSBTAG00000048125	ENTPD2	11:106183597-106189094	q1	q2	OK	30.2882	3.86057	-2.97187	7.84553	0.127461	25.5706	0	0	yes
ENSBTAG00000039380	ENSBTAG00000039380	-	5:102489628-102521321	q1	q2	NOTEST	0.0627511	0.00800731	-2.97025	7.83673	0.127604	1.27684	0.20166	1	no
ENSBTAG00000010507	ENSBTAG00000010507	S22AG_BOVIN	9:40231966-40267950	q1	q2	NOTEST	0.120932	0.0154541	-2.96814	7.82524	0.127791	1.82917	0.0673749	1	no
ENSBTAG00000047412	ENSBTAG00000047412	Q08DT5_BOVIN	16:41541498-41552708	q1	q2	NOTEST	0.274632	0.0351798	-2.96468	7.80653	0.128098	3.49288	0.00047784	1	no
ENSBTAG00000046758	ENSBTAG00000046758	RNF223	16:52656950-52657700	q1	q2	OK	1.10128	0.141165	-2.96373	7.80137	0.128182	2.63349	0.00845132	0.0129839	yes
ENSBTAG00000013469	ENSBTAG00000013469	SRCIN1	19:39793400-39852765	q1	q2	OK	2.44315	0.313541	-2.96201	7.79212	0.128335	11.4766	0	0	yes
ENSBTAG00000000601	ENSBTAG00000000601	Q7M2X6_BOVIN	23:7290454-7318840	q1	q2	OK	1.10698	0.142078	-2.96188	7.79135	0.128347	9.42924	0	0	yes
ENSBTAG00000016928	ENSBTAG00000016928	Q0IIL8_BOVIN	26:21713121-21730353	q1	q2	OK	1.44784	0.185955	-2.96088	7.78597	0.128436	5.9595	2.53009e-09	6.58027e-09	yes
ENSBTAG00000005475	ENSBTAG00000005475	FAM115C	4:107804451-107821622	q1	q2	OK	33.8067	4.34379	-2.96028	7.78277	0.128489	33.3779	0	0	yes
ENSBTAG00000031871	ENSBTAG00000031871	A7E308_BOVIN	23:30175392-30179010	q1	q2	OK	0.406329	0.052223	-2.95989	7.78065	0.128524	4.46296	8.08337e-06	1.65973e-05	yes
ENSBTAG00000001242	ENSBTAG00000001242	Q0ZCB3_BOVIN	26:34805080-34806484	q1	q2	NOTEST	0.170196	0.0218947	-2.95854	7.77339	0.128644	1.77108	0.0765473	1	no
ENSBTAG00000003321	ENSBTAG00000003321	Q2KIX9_BOVIN	X:60442347-60489231	q1	q2	OK	2.2915	0.295491	-2.95511	7.75489	0.128951	4.74404	2.095e-06	4.50097e-06	yes
ENSBTAG00000004249	ENSBTAG00000004249	TANC2	19:48089630-48406633	q1	q2	OK	2.04882	0.264498	-2.95346	7.74607	0.129098	13.6	0	0	yes
ENSBTAG00000008121	ENSBTAG00000008121	RSPO3	9:24365332-24508267	q1	q2	NOTEST	0.256186	0.0330732	-2.95346	7.74603	0.129098	1.76724	0.0771881	1	no
ENSBTAG00000039261	ENSBTAG00000039261	KRT2	5:27430823-27438447	q1	q2	NOTEST	0.0411168	0.00531409	-2.95184	7.73732	0.129243	0.461786	0.644235	1	no
ENSBTAG00000008095	ENSBTAG00000008095	ACER1	7:19329859-19353051	q1	q2	OK	0.837498	0.108244	-2.9518	7.73713	0.129247	3.50414	0.000458093	0.000805998	yes
ENSBTAG00000030539	ENSBTAG00000030539	KT222_BOVIN	19:41515534-41524688	q1	q2	NOTEST	0.245943	0.0318379	-2.9495	7.72485	0.129453	2.46347	0.0137601	1	no
ENSBTAG00000020923	ENSBTAG00000020923	E1BEK6_BOVIN	7:4264309-4266113	q1	q2	OK	0.836005	0.108253	-2.9491	7.7227	0.129489	3.57054	0.000356242	0.00063268	yes
ENSBTAG00000014912	ENSBTAG00000014912	FMOD_BOVIN	16:925080-935131	q1	q2	NOTEST	0.237615	0.0307691	-2.94907	7.72252	0.129492	2.57625	0.00998782	1	no
ENSBTAG00000024530	ENSBTAG00000024530	-	27:23016750-23017142	q1	q2	NOTEST	0.091623	0.0118848	-2.94659	7.70926	0.129714	0.159395	0.873358	1	no
ENSBTAG00000002691	ENSBTAG00000002691	ELMD1_BOVIN	15:17375526-17461023	q1	q2	OK	2.20388	0.285923	-2.94634	7.70795	0.129737	8.16925	2.22045e-16	8.1706e-16	yes
ENSBTAG00000001401	ENSBTAG00000001401	SLC45A1	16:45886756-45908565	q1	q2	NOTEST	0.170547	0.0221362	-2.94569	7.70444	0.129795	2.40859	0.0160144	1	no
ENSBTAG00000010999	ENSBTAG00000010999	IL17RD	22:44485035-44547391	q1	q2	OK	3.7246	0.483712	-2.94487	7.70004	0.129869	10.9039	0	0	yes
ENSBTAG00000016010	ENSBTAG00000016010	Q0VCQ5_BOVIN	4:31900914-31956645	q1	q2	OK	20.2534	2.63114	-2.9444	7.69758	0.129911	26.8005	0	0	yes
ENSBTAG00000007698	ENSBTAG00000007698	TM59L_BOVIN	7:4507986-4513857	q1	q2	OK	138.768	18.0569	-2.94205	7.68504	0.130123	37.2418	0	0	yes
ENSBTAG00000023731	ENSBTAG00000023731	MSHR_BOVIN	18:14757331-14759082	q1	q2	OK	10.3975	1.35514	-2.93973	7.67264	0.130333	15.9136	0	0	yes
ENSBTAG00000040132	ENSBTAG00000040132	MUM1L1	X:53703693-53705778	q1	q2	OK	1.98177	0.2587	-2.93744	7.66049	0.13054	7.58856	3.24185e-14	1.08919e-13	yes
ENSBTAG00000020082	ENSBTAG00000020082	FAM71E1	18:57066060-57071540	q1	q2	OK	11.7932	1.54531	-2.93199	7.63161	0.131034	10.279	0	0	yes
ENSBTAG00000002758	ENSBTAG00000002758	THBD	13:42217370-42221004	q1	q2	NOTEST	0.230419	0.0302304	-2.93018	7.6221	0.131198	3.45775	0.000544708	1	no
ENSBTAG00000032591	ENSBTAG00000032591	A2VDY0_BOVIN	14:63311965-63328221	q1	q2	OK	0.315501	0.0414082	-2.92966	7.61929	0.131246	2.37301	0.0176439	0.0260629	yes
ENSBTAG00000046212	ENSBTAG00000046212	-	3:18332098-18332193	q1	q2	OK	19.6529	2.58031	-2.92912	7.61649	0.131295	0.328436	0.742582	0.791374	no
ENSBTAG00000004751	ENSBTAG00000004751	SPTBN4	18:50077665-50154685	q1	q2	OK	0.897531	0.117857	-2.92892	7.61542	0.131313	10.4723	0	0	yes
ENSBTAG00000031178	ENSBTAG00000031178	F1N798_BOVIN	1:126040088-126704342	q1	q2	OK	0.994781	0.130706	-2.92806	7.61083	0.131391	7.13487	9.68781e-13	3.0378e-12	yes
ENSBTAG00000019467	ENSBTAG00000019467	ACL7B_BOVIN	8:100138373-100139780	q1	q2	OK	0.376922	0.0496205	-2.92526	7.59609	0.131646	2.31407	0.020664	0.0302712	yes
ENSBTAG00000000277	ENSBTAG00000000277	IL18_BOVIN	15:22800426-22826698	q1	q2	OK	14.2219	1.87838	-2.92055	7.57136	0.132077	11.387	0	0	yes
ENSBTAG00000007778	ENSBTAG00000007778	Q17QV5_BOVIN	8:47013618-47320993	q1	q2	NOTEST	0.196817	0.0259968	-2.92045	7.57082	0.132086	3.69431	0.000220482	1	no
ENSBTAG00000003336	ENSBTAG00000003336	Q0VBY4_BOVIN	9:26310579-26403759	q1	q2	OK	14.0803	1.86051	-2.91991	7.56798	0.132135	16.5822	0	0	yes
ENSBTAG00000021216	ENSBTAG00000021216	HECW1	4:78221618-78492463	q1	q2	NOTEST	0.118759	0.0156933	-2.91981	7.5675	0.132145	2.95853	0.00309107	1	no
ENSBTAG00000021113	ENSBTAG00000021113	F1N015_BOVIN	19:34483123-34489156	q1	q2	NOTEST	0.224963	0.0297512	-2.91867	7.56148	0.132249	1.82893	0.0674102	1	no
ENSBTAG00000017322	ENSBTAG00000017322	ARL14	1:107687595-107688174	q1	q2	OK	0.581976	0.0770212	-2.91763	7.55605	0.132344	1.90003	0.0574297	0.079155	no
ENSBTAG00000021316	ENSBTAG00000021316	COL4A3	2:116130999-116291205	q1	q2	NOTEST	0.0905473	0.0119851	-2.91743	7.55499	0.132363	2.24208	0.0249563	1	no
ENSBTAG00000012648	ENSBTAG00000012648	ZSWIM5	3:101566201-101614105	q1	q2	NOTEST	0.202581	0.0268232	-2.91695	7.55245	0.132407	2.52448	0.011587	1	no
ENSBTAG00000014620	ENSBTAG00000014620	FOXI1	20:1903853-1907281	q1	q2	NOTEST	0.23131	0.0306376	-2.91645	7.54987	0.132453	1.7012	0.0889054	1	no
ENSBTAG00000007352	ENSBTAG00000007352	KCNC4	3:33302948-33325104	q1	q2	OK	1.96523	0.260303	-2.91643	7.54978	0.132455	9.35971	0	0	yes
ENSBTAG00000046628	ENSBTAG00000046628	LYSC3_BOVIN	5:44631280-44638274	q1	q2	NOTEST	0.20057	0.0265799	-2.9157	7.54593	0.132522	1.32499	0.185176	1	no
ENSBTAG00000008897	ENSBTAG00000008897	A4FUG5_BOVIN	5:28640674-28677837	q1	q2	NOTEST	0.118576	0.0157204	-2.9151	7.54281	0.132577	1.89768	0.0577385	1	no
ENSBTAG00000014391	ENSBTAG00000014391	CRB2	11:94501987-94523379	q1	q2	OK	1.81309	0.240393	-2.91498	7.54219	0.132588	10.2131	0	0	yes
ENSBTAG00000015366	ENSBTAG00000015366	Q17QP5_BOVIN	4:50009881-50020466	q1	q2	OK	3.05141	0.404909	-2.91381	7.53604	0.132695	8.32908	0	0	yes
ENSBTAG00000002174	ENSBTAG00000002174	RERG_BOVIN	5:95098305-95228587	q1	q2	NOTEST	0.0960238	0.0127449	-2.91347	7.53429	0.132727	1.39416	0.16327	1	no
ENSBTAG00000036113	ENSBTAG00000036113	RTDR1	17:73799587-73847910	q1	q2	OK	2.42928	0.322464	-2.91332	7.53349	0.13274	5.82515	5.70604e-09	1.45472e-08	yes
ENSBTAG00000040005	ENSBTAG00000040005	FXYD3	18:46033468-46039340	q1	q2	OK	5.71808	0.759193	-2.91299	7.53179	0.132771	6.79836	1.05813e-11	3.14808e-11	yes
ENSBTAG00000002292	ENSBTAG00000002292	SMARCA1	X:13358798-13433781	q1	q2	OK	18.4809	2.45593	-2.91169	7.52501	0.132891	27.3855	0	0	yes
ENSBTAG00000031160	ENSBTAG00000031160	IGLL1	17:72826679-73152862	q1	q2	OK	0.878285	0.116794	-2.91073	7.51995	0.132979	2.29132	0.0219447	0.032055	yes
ENSBTAG00000015016	ENSBTAG00000015016	CALCOCO1	5:26489543-26503712	q1	q2	OK	118.522	15.7616	-2.91068	7.51967	0.132984	39.7611	0	0	yes
ENSBTAG00000017751	ENSBTAG00000017751	RGS9	19:62593649-62654740	q1	q2	OK	3.86858	0.514657	-2.91012	7.51681	0.133035	6.51475	7.28129e-11	2.0781e-10	yes
ENSBTAG00000013884	ENSBTAG00000013884	A6QPH2_BOVIN	29:44484283-44493549	q1	q2	OK	7.1939	0.957244	-2.90982	7.51522	0.133063	18.8775	0	0	yes
ENSBTAG00000013614	ENSBTAG00000013614	TM38A_BOVIN	7:6285841-6312400	q1	q2	OK	4.16471	0.554341	-2.90937	7.5129	0.133104	11.6011	0	0	yes
ENSBTAG00000002998	ENSBTAG00000002998	MFI2	1:72086118-72109936	q1	q2	OK	0.626209	0.0835099	-2.90663	7.49862	0.133357	4.48764	7.20178e-06	1.48641e-05	yes
ENSBTAG00000026242	ENSBTAG00000026242	BAALC	14:63446265-63534092	q1	q2	OK	3.0483	0.406965	-2.90503	7.49032	0.133505	8.14172	4.44089e-16	1.61874e-15	yes
ENSBTAG00000031084	ENSBTAG00000031084	CDRT4	19:33524874-33548224	q1	q2	OK	1.20476	0.160849	-2.90497	7.49001	0.133511	3.27903	0.00104164	0.00176643	yes
ENSBTAG00000003705	ENSBTAG00000003705	FAM83G	19:34817324-34872403	q1	q2	OK	8.88555	1.19161	-2.89855	7.45676	0.134106	17.5646	0	0	yes
ENSBTAG00000013995	ENSBTAG00000013995	-	X:119253544-119254582	q1	q2	OK	4.17701	0.560344	-2.89809	7.45437	0.134149	7.40493	1.31228e-13	4.28507e-13	yes
ENSBTAG00000047426	ENSBTAG00000047426	LYPD6	2:46723404-46759004	q1	q2	OK	23.9781	3.22104	-2.89612	7.44421	0.134332	10.8428	0	0	yes
ENSBTAG00000025130	ENSBTAG00000025130	HIC1	19:23655530-23659389	q1	q2	OK	0.392052	0.0526893	-2.89546	7.44083	0.134394	3.55852	0.000372949	0.000661268	yes
ENSBTAG00000023843	ENSBTAG00000023843	RALGPS1	11:97674641-97975506	q1	q2	OK	8.72862	1.1742	-2.89408	7.43367	0.134523	14.9363	0	0	yes
ENSBTAG00000040329	ENSBTAG00000040329	HTR1D	2:130245901-130247035	q1	q2	OK	0.89563	0.120508	-2.89377	7.43212	0.134551	3.32775	0.00087549	0.00149559	yes
ENSBTAG00000033600	ENSBTAG00000033600	-	5:22333868-22334542	q1	q2	NOTEST	0.0977523	0.0131582	-2.89317	7.429	0.134607	0.183656	0.854284	1	no
ENSBTAG00000012284	ENSBTAG00000012284	CLCN2	1:83443168-83457221	q1	q2	OK	3.15111	0.424261	-2.89283	7.42729	0.134639	12.007	0	0	yes
ENSBTAG00000021807	ENSBTAG00000021807	TKNK_BOVIN	5:56744604-56748242	q1	q2	OK	3.67486	0.494826	-2.89269	7.42657	0.134652	2.92877	0.00340307	0.00547426	yes
ENSBTAG00000021177	ENSBTAG00000021177	ADAMTS14	28:26985667-27080093	q1	q2	OK	0.351654	0.0474762	-2.88888	7.40695	0.135008	4.37563	1.21082e-05	2.45638e-05	yes
ENSBTAG00000009105	ENSBTAG00000009105	Q0IIC1_BOVIN	7:19462466-19499738	q1	q2	NOTEST	0.233309	0.0315272	-2.88757	7.40024	0.135131	2.51876	0.0117769	1	no
ENSBTAG00000002144	ENSBTAG00000002144	ADRB2_BOVIN	7:62229185-62230442	q1	q2	OK	1.77765	0.240264	-2.88728	7.39874	0.135158	5.49693	3.86466e-08	9.35571e-08	yes
ENSBTAG00000014930	ENSBTAG00000014930	MYLK2_BOVIN	13:61900819-61915380	q1	q2	NOTEST	0.215455	0.0292038	-2.88316	7.37764	0.135545	2.25305	0.0242562	1	no
ENSBTAG00000014575	ENSBTAG00000014575	COL4A5	X:61685326-61824307	q1	q2	NOTEST	0.274411	0.0372366	-2.88154	7.36939	0.135697	4.79366	1.63769e-06	1	no
ENSBTAG00000005736	ENSBTAG00000005736	E1BNJ8_BOVIN	11:73199745-73210147	q1	q2	NOTEST	0.101725	0.0138353	-2.87825	7.35257	0.136007	1.53082	0.125815	1	no
ENSBTAG00000013079	ENSBTAG00000013079	B2CML0_BOVIN	13:59193464-59217987	q1	q2	NOTEST	0.0691586	0.00940661	-2.87816	7.35213	0.136015	1.3919	0.163951	1	no
ENSBTAG00000020989	ENSBTAG00000020989	SUSD4	16:27388709-27522155	q1	q2	OK	0.310253	0.042208	-2.87786	7.35057	0.136044	3.39394	0.00068896	0.00119196	yes
ENSBTAG00000016627	ENSBTAG00000016627	WASF1_BOVIN	9:40520684-40591232	q1	q2	OK	8.01549	1.09225	-2.87549	7.33851	0.136267	17.1645	0	0	yes
ENSBTAG00000032651	ENSBTAG00000032651	Q2NKS8_BOVIN	11:27647166-27888855	q1	q2	NOTEST	0.0312556	0.00425911	-2.87549	7.33853	0.136267	0.116608	0.90717	1	no
ENSBTAG00000031065	ENSBTAG00000031065	-	22:55944218-56217921	q1	q2	OK	0.650377	0.0887096	-2.87411	7.33153	0.136398	1.04851	0.294404	0.355532	no
ENSBTAG00000003093	ENSBTAG00000003093	T10IP_BOVIN	29:44716271-44725594	q1	q2	NOTEST	0.260889	0.0356406	-2.87184	7.31999	0.136612	2.4743	0.0133499	1	no
ENSBTAG00000017354	ENSBTAG00000017354	MPP7_BOVIN	13:36610251-36833259	q1	q2	OK	4.856	0.663491	-2.87162	7.31886	0.136633	15.2358	0	0	yes
ENSBTAG00000006780	ENSBTAG00000006780	E1BJW6_BOVIN	18:56967042-56974391	q1	q2	OK	1.61926	0.221318	-2.87114	7.31644	0.136679	5.20992	1.88919e-07	4.36614e-07	yes
ENSBTAG00000010060	ENSBTAG00000010060	SLC43A3	15:81978439-81996848	q1	q2	NOTEST	0.0985159	0.0134677	-2.87085	7.31498	0.136706	1.49188	0.13573	1	no
ENSBTAG00000015834	ENSBTAG00000015834	ARHGEF4	2:1609040-1792901	q1	q2	OK	1.14978	0.15723	-2.87041	7.31273	0.136748	7.20259	5.90861e-13	1.87115e-12	yes
ENSBTAG00000002473	ENSBTAG00000002473	ANGL4_BOVIN	7:18236516-18243581	q1	q2	NOTEST	0.261072	0.035703	-2.87033	7.31233	0.136755	2.3156	0.0205799	1	no
ENSBTAG00000044066	ENSBTAG00000044066	C1orf101	16:33339758-33474952	q1	q2	NOTEST	0.166898	0.0228266	-2.87018	7.31156	0.13677	2.24114	0.0250169	1	no
ENSBTAG00000014611	ENSBTAG00000014611	SORL1	15:32584733-32755339	q1	q2	NOTEST	0.0689386	0.00943703	-2.86891	7.30512	0.13689	2.44817	0.0143583	1	no
ENSBTAG00000009093	ENSBTAG00000009093	GAL3ST2	3:121262583-121265562	q1	q2	OK	0.642905	0.0881079	-2.86726	7.29679	0.137047	2.89679	0.00377	0.00602933	yes
ENSBTAG00000004004	ENSBTAG00000004004	Q08E16_BOVIN	5:113160818-113174721	q1	q2	OK	29.0129	3.98887	-2.86264	7.27346	0.137486	27.3866	0	0	yes
ENSBTAG00000011027	ENSBTAG00000011027	PTGR1	8:102666739-102697281	q1	q2	OK	9.05396	1.24532	-2.86203	7.27039	0.137544	12.2791	0	0	yes
ENSBTAG00000007550	ENSBTAG00000007550	OLFM2	7:15550297-15556967	q1	q2	NOTEST	0.176731	0.0243453	-2.85984	7.25935	0.137753	1.85314	0.0638622	1	no
ENSBTAG00000006789	ENSBTAG00000006789	FGD5	22:58037232-58148743	q1	q2	OK	0.719224	0.0992877	-2.85676	7.24384	0.138048	7.88199	3.33067e-15	1.17305e-14	yes
ENSBTAG00000012119	ENSBTAG00000012119	PTPRZ1	4:87077522-87295626	q1	q2	NOTEST	0.154736	0.0213655	-2.85645	7.24233	0.138077	4.44712	8.70298e-06	1	no
ENSBTAG00000011373	ENSBTAG00000011373	MAML3	17:18144414-18325277	q1	q2	OK	6.17551	0.852838	-2.85622	7.24113	0.138099	14.5653	0	0	yes
ENSBTAG00000047563	ENSBTAG00000047563	CLDN9	25:2433849-2434503	q1	q2	OK	2.81036	0.389097	-2.85255	7.22277	0.138451	4.30031	1.70556e-05	3.41743e-05	yes
ENSBTAG00000036028	ENSBTAG00000036028	Q2KIR6_BOVIN	X:57184739-57186320	q1	q2	OK	28.2446	3.91739	-2.85001	7.21006	0.138695	16.2051	0	0	yes
ENSBTAG00000012182	ENSBTAG00000012182	Q3ZBQ6_BOVIN	3:77571198-77573843	q1	q2	OK	4.64563	0.644486	-2.84965	7.20827	0.13873	9.97037	0	0	yes
ENSBTAG00000031551	ENSBTAG00000031551	F1N116_BOVIN	25:27450355-27455369	q1	q2	OK	4.14912	0.576508	-2.84739	7.19699	0.138947	10.575	0	0	yes
ENSBTAG00000038025	ENSBTAG00000038025	F1N453_BOVIN	3:20771299-20773622	q1	q2	OK	88.1428	12.2506	-2.84699	7.19498	0.138986	36.3429	0	0	yes
ENSBTAG00000046699	ENSBTAG00000046699	A4IFU4_BOVIN	2:79975338-80043984	q1	q2	OK	0.83349	0.11593	-2.84591	7.1896	0.13909	3.26487	0.00109516	0.0018541	yes
ENSBTAG00000012015	ENSBTAG00000012015	FSIP1	10:35350328-35538497	q1	q2	OK	2.89637	0.402882	-2.84582	7.18913	0.139099	8.59261	0	0	yes
ENSBTAG00000010165	ENSBTAG00000010165	A6QLJ9_BOVIN	22:50360692-50369136	q1	q2	OK	2.30373	0.320449	-2.84581	7.18907	0.1391	8.21612	2.22045e-16	8.1706e-16	yes
ENSBTAG00000012370	ENSBTAG00000012370	Q56JX0_BOVIN	5:95456443-95459983	q1	q2	OK	0.997998	0.138865	-2.84535	7.18682	0.139144	2.10155	0.0355926	0.0505562	no
ENSBTAG00000014359	ENSBTAG00000014359	DRAXI_BOVIN	16:42840334-42868899	q1	q2	OK	0.34338	0.0478117	-2.84437	7.18192	0.139238	2.86134	0.00421859	0.00670785	yes
ENSBTAG00000022150	ENSBTAG00000022150	MXRA5	X:138878611-138902586	q1	q2	OK	0.543972	0.0760348	-2.8388	7.15425	0.139777	7.7571	8.65974e-15	2.99738e-14	yes
ENSBTAG00000007746	ENSBTAG00000007746	Q8SQA5_BOVIN	4:25785332-25834977	q1	q2	OK	9.87689	1.38116	-2.83817	7.15116	0.139838	18.6221	0	0	yes
ENSBTAG00000025837	ENSBTAG00000025837	RFX4	5:70323197-70395056	q1	q2	NOTEST	0.228102	0.0319313	-2.83664	7.14352	0.139987	3.2745	0.00105848	1	no
ENSBTAG00000039856	ENSBTAG00000039856	-	27:5219283-5227956	q1	q2	OK	1.05387	0.147538	-2.83653	7.14304	0.139997	1.59989	0.109623	0.144658	no
ENSBTAG00000037743	ENSBTAG00000037743	-	5:103664842-103687826	q1	q2	OK	0.465993	0.0653291	-2.83451	7.13301	0.140193	2.45723	0.0140014	0.0209044	yes
ENSBTAG00000002080	ENSBTAG00000002080	Q2HJ34_BOVIN	14:47005559-47013935	q1	q2	OK	2.31756	0.324999	-2.8341	7.13098	0.140233	8.83104	0	0	yes
ENSBTAG00000015378	ENSBTAG00000015378	C9orf174	8:62995708-63029685	q1	q2	OK	0.343486	0.0481753	-2.83389	7.12992	0.140254	3.82413	0.000131234	0.000242411	yes
ENSBTAG00000030208	ENSBTAG00000030208	FAM132B	3:118122669-118131088	q1	q2	OK	0.471335	0.0661139	-2.83373	7.12914	0.140269	2.46603	0.0136619	0.0204445	yes
ENSBTAG00000017877	ENSBTAG00000017877	A6QLR1_BOVIN	3:8421827-8438222	q1	q2	OK	2.72133	0.38216	-2.83207	7.12092	0.140431	11.3988	0	0	yes
ENSBTAG00000015656	ENSBTAG00000015656	WSCD1	19:26254179-26285583	q1	q2	NOTEST	0.160245	0.0225181	-2.83112	7.11628	0.140523	1.76465	0.0776226	1	no
ENSBTAG00000010836	ENSBTAG00000010836	PRRT3	22:16857728-16863951	q1	q2	NOTEST	0.0936785	0.0131721	-2.83024	7.11189	0.140609	1.77138	0.0764972	1	no
ENSBTAG00000019249	ENSBTAG00000019249	HS3ST6	25:1486478-1492437	q1	q2	OK	2.77046	0.389559	-2.83021	7.11179	0.140612	5.93818	2.8821e-09	7.47903e-09	yes
ENSBTAG00000002673	ENSBTAG00000002673	-	5:28197780-28199954	q1	q2	OK	1.60257	0.225648	-2.82824	7.10208	0.140804	6.68117	2.37039e-11	6.93304e-11	yes
ENSBTAG00000003658	ENSBTAG00000003658	RELN_BOVIN	4:44892393-45289293	q1	q2	OK	0.704402	0.0991872	-2.82817	7.10174	0.140811	2.12926	0.0332325	0.0473843	yes
ENSBTAG00000007644	ENSBTAG00000007644	GBG7_BOVIN	7:22200649-22338566	q1	q2	OK	17.2277	2.42669	-2.82767	7.09926	0.14086	26.284	0	0	yes
ENSBTAG00000004192	ENSBTAG00000004192	LRRC43	17:55423457-55438850	q1	q2	NOTEST	0.249214	0.0351379	-2.82629	7.09246	0.140994	1.78098	0.074916	1	no
ENSBTAG00000010033	ENSBTAG00000010033	E1BFL1_BOVIN	3:86609665-86640839	q1	q2	OK	0.689204	0.0972439	-2.82525	7.08738	0.141096	3.67106	0.000241547	0.000435642	yes
ENSBTAG00000006338	ENSBTAG00000006338	MYCL1	3:106787760-106791865	q1	q2	OK	7.12733	1.00654	-2.82396	7.08102	0.141222	10.0831	0	0	yes
ENSBTAG00000020859	ENSBTAG00000020859	A2AP_BOVIN	19:23403656-23411269	q1	q2	OK	0.29086	0.0410912	-2.82342	7.0784	0.141275	3.0459	0.00231986	0.00379291	yes
ENSBTAG00000014354	ENSBTAG00000014354	FXYD6_BOVIN	15:28926759-28963808	q1	q2	OK	0.599768	0.0847472	-2.82317	7.07714	0.1413	3.26301	0.00110237	0.00186534	yes
ENSBTAG00000025246	ENSBTAG00000025246	ZIC2	12:80714188-80724166	q1	q2	OK	2.15661	0.30532	-2.82037	7.06344	0.141574	9.58479	0	0	yes
ENSBTAG00000047121	ENSBTAG00000047121	-	17:72826679-73152862	q1	q2	NOTEST	0.19614	0.0277716	-2.8202	7.06261	0.141591	1.17023	0.241907	1	no
ENSBTAG00000018817	ENSBTAG00000018817	E1BJ03_BOVIN	7:59524544-59525876	q1	q2	OK	0.334206	0.0473686	-2.81873	7.05543	0.141735	1.76601	0.0773947	0.104599	no
ENSBTAG00000009913	ENSBTAG00000009913	UPK3A_BOVIN	5:116413857-116422253	q1	q2	OK	0.389849	0.0553177	-2.8171	7.04745	0.141895	1.76169	0.0781224	0.105503	no
ENSBTAG00000016209	ENSBTAG00000016209	SLURP1	14:2834780-2835985	q1	q2	OK	0.988334	0.14026	-2.8169	7.04644	0.141915	2.31714	0.0204963	0.030031	yes
ENSBTAG00000014925	ENSBTAG00000014925	NPAS4	29:45110165-45115042	q1	q2	NOTEST	0.0814974	0.0115677	-2.81665	7.04526	0.14194	1.72788	0.0840092	1	no
ENSBTAG00000042304	ENSBTAG00000042304	U6	25:26778319-26778426	q1	q2	OK	8.95485	1.27138	-2.81627	7.04341	0.141977	0.248201	0.803979	0.843706	no
ENSBTAG00000048157	ENSBTAG00000048157	-	1:45522504-45642829	q1	q2	OK	7.50051	1.06575	-2.81512	7.03778	0.14209	18.7826	0	0	yes
ENSBTAG00000013099	ENSBTAG00000013099	Q3ZBY4_BOVIN	19:20588067-20591570	q1	q2	OK	42.0394	5.97508	-2.81471	7.03579	0.142131	26.1482	0	0	yes
ENSBTAG00000002964	ENSBTAG00000002964	TXLNB	9:77937304-77996890	q1	q2	NOTEST	0.232917	0.0331128	-2.81436	7.03405	0.142165	2.69993	0.00693549	1	no
ENSBTAG00000020520	ENSBTAG00000020520	Q3SZ02_BOVIN	19:35423866-35425459	q1	q2	OK	2.17014	0.308827	-2.81292	7.02704	0.142307	6.32912	2.46568e-10	6.82752e-10	yes
ENSBTAG00000005525	ENSBTAG00000005525	LHX6	11:93069013-93090242	q1	q2	OK	1.69693	0.241898	-2.81046	7.01506	0.14255	5.00303	5.64361e-07	1.26252e-06	yes
ENSBTAG00000020890	ENSBTAG00000020890	TRIM66	15:44500911-44530712	q1	q2	OK	0.903423	0.128794	-2.81034	7.01448	0.142562	7.08274	1.41331e-12	4.3995e-12	yes
ENSBTAG00000000445	ENSBTAG00000000445	PDE6C	26:14956030-15009228	q1	q2	OK	0.381129	0.0543613	-2.80963	7.01104	0.142632	3.79883	0.000145383	0.000267666	yes
ENSBTAG00000003403	ENSBTAG00000003403	PADI2	2:136049643-136103406	q1	q2	OK	54.1171	7.72037	-2.80934	7.00965	0.142661	31.1815	0	0	yes
ENSBTAG00000008864	ENSBTAG00000008864	Q2LGB2_BOVIN	14:39369424-39402263	q1	q2	OK	6.33944	0.906097	-2.80662	6.99643	0.14293	5.8699	4.3605e-09	1.11958e-08	yes
ENSBTAG00000015483	ENSBTAG00000015483	Q6PVA0_BOVIN	22:12678579-12679638	q1	q2	NOTEST	0.274774	0.0392739	-2.8066	6.99635	0.142932	1.53258	0.12538	1	no
ENSBTAG00000031774	ENSBTAG00000031774	A5PK20_BOVIN	23:31530229-31531841	q1	q2	NOTEST	0.000101299	1.45155e-05	-2.80295	6.97868	0.143294	0.00135356	0.99892	1	no
ENSBTAG00000021272	ENSBTAG00000021272	E1BDU6_BOVIN	1:143990493-144053318	q1	q2	NOTEST	0.0802398	0.0115036	-2.80223	6.97519	0.143366	1.71794	0.0858083	1	no
ENSBTAG00000013861	ENSBTAG00000013861	A8E655_BOVIN	11:22443219-22797877	q1	q2	OK	3.70406	0.531256	-2.80163	6.97227	0.143425	12.288	0	0	yes
ENSBTAG00000047894	ENSBTAG00000047894	SLC32A1	13:68195056-68199035	q1	q2	NOTEST	0.18755	0.0270242	-2.79495	6.94008	0.144091	1.7458	0.0808462	1	no
ENSBTAG00000021041	ENSBTAG00000021041	PRAM1	7:18331127-18339203	q1	q2	NOTEST	0.134895	0.0194848	-2.79141	6.92309	0.144445	1.77745	0.0754949	1	no
ENSBTAG00000017674	ENSBTAG00000017674	SCNN1D	16:52595745-52599094	q1	q2	OK	4.58132	0.661912	-2.79105	6.92134	0.144481	10.375	0	0	yes
ENSBTAG00000001183	ENSBTAG00000001183	KLHL33	10:26728621-26738305	q1	q2	NOTEST	0.127802	0.0184858	-2.78943	6.91352	0.144643	2.82744	0.00469213	1	no
ENSBTAG00000012559	ENSBTAG00000012559	SLC6A18	20:71284702-71299686	q1	q2	OK	0.508548	0.0735657	-2.78928	6.91284	0.144658	3.53478	0.000408108	0.000721406	yes
ENSBTAG00000019669	ENSBTAG00000019669	C163A_BOVIN	5:102245936-102278444	q1	q2	NOTEST	0.119923	0.0173497	-2.78913	6.91211	0.144673	2.05937	0.0394587	1	no
ENSBTAG00000043979	ENSBTAG00000043979	-	19:37113476-37122446	q1	q2	OK	0.363003	0.0525213	-2.78901	6.91154	0.144685	2.0993	0.0357902	0.0508147	no
ENSBTAG00000016548	ENSBTAG00000016548	Q3T080_BOVIN	15:22829845-22834357	q1	q2	OK	0.687483	0.0995169	-2.78831	6.9082	0.144755	2.75215	0.00592053	0.00926197	yes
ENSBTAG00000019958	ENSBTAG00000019958	NXNL2	8:91124598-91132281	q1	q2	OK	2.39086	0.346571	-2.78631	6.89862	0.144956	7.21616	5.34683e-13	1.69523e-12	yes
ENSBTAG00000045798	ENSBTAG00000045798	-	X:34377970-34378351	q1	q2	NOTEST	0.107644	0.0156087	-2.78585	6.89641	0.145003	0.184149	0.853897	1	no
ENSBTAG00000025748	ENSBTAG00000025748	F1MCD2_BOVIN	7:8550499-8566437	q1	q2	NOTEST	0.138056	0.0200278	-2.78518	6.89322	0.14507	1.38318	0.166611	1	no
ENSBTAG00000043713	ENSBTAG00000043713	U6	2:34173877-34193022	q1	q2	OK	82.0053	11.9003	-2.78472	6.89103	0.145116	1.3638	0.172631	0.218737	no
ENSBTAG00000030484	ENSBTAG00000030484	E1BE09_BOVIN	18:57461616-57465567	q1	q2	OK	0.731925	0.106223	-2.78461	6.89046	0.145127	2.13283	0.0329383	0.0470076	yes
ENSBTAG00000045901	ENSBTAG00000045901	CLDN6	25:2435643-2438483	q1	q2	OK	4.20266	0.610032	-2.78434	6.88925	0.145154	6.45905	1.05359e-10	2.98187e-10	yes
ENSBTAG00000011328	ENSBTAG00000011328	Q24JZ6_BOVIN	11:72521481-72524704	q1	q2	OK	1.59437	0.231576	-2.78343	6.88487	0.145246	5.56917	2.5595e-08	6.26793e-08	yes
ENSBTAG00000009019	ENSBTAG00000009019	SH3PXD2B	20:4010452-4094221	q1	q2	OK	46.6461	6.77962	-2.78248	6.88034	0.145342	31.9799	0	0	yes
ENSBTAG00000032869	ENSBTAG00000032869	F1MSQ3_BOVIN	10:26631718-26632354	q1	q2	OK	5.07082	0.738282	-2.77998	6.86841	0.145594	5.77819	7.55068e-09	1.91004e-08	yes
ENSBTAG00000003871	ENSBTAG00000003871	F1MN98_BOVIN	18:50564355-50581387	q1	q2	OK	0.354283	0.0516121	-2.77912	6.86434	0.145681	3.31925	0.000902591	0.00153962	yes
ENSBTAG00000032003	ENSBTAG00000032003	ZCCHC13	X:81941607-81942135	q1	q2	OK	0.281245	0.040975	-2.77901	6.86382	0.145692	0.861932	0.388725	0.45348	no
ENSBTAG00000000843	ENSBTAG00000000843	NDRG2	10:26134841-26142255	q1	q2	OK	26.8631	3.91537	-2.7784	6.86094	0.145753	19.3883	0	0	yes
ENSBTAG00000017039	ENSBTAG00000017039	ARHGEF33	11:21264577-21318757	q1	q2	NOTEST	0.149638	0.021814	-2.77815	6.85972	0.145779	2.24385	0.0248419	1	no
ENSBTAG00000002497	ENSBTAG00000002497	A4FUF2_BOVIN	23:45093667-45111322	q1	q2	OK	15.4529	2.25687	-2.77548	6.84705	0.146049	12.747	0	0	yes
ENSBTAG00000038262	ENSBTAG00000038262	-	29:51371104-51461957	q1	q2	NOTEST	0.230458	0.0336625	-2.77529	6.84613	0.146068	3.05357	0.00226134	1	no
ENSBTAG00000013525	ENSBTAG00000013525	Q0P5G6_BOVIN	23:27403127-27406360	q1	q2	OK	1.19888	0.175162	-2.77492	6.84441	0.146105	6.2484	4.14665e-10	1.13393e-09	yes
ENSBTAG00000000109	ENSBTAG00000000109	NPTXR	5:110939443-110956819	q1	q2	OK	25.1308	3.67754	-2.77264	6.83359	0.146336	19.5121	0	0	yes
ENSBTAG00000047546	ENSBTAG00000047546	-	7:31173256-31173637	q1	q2	OK	0.72734	0.106445	-2.77252	6.83301	0.146349	0.871214	0.383637	0.448671	no
ENSBTAG00000017512	ENSBTAG00000017512	TAU_BOVIN	19:46524374-46644713	q1	q2	OK	50.1138	7.3406	-2.77124	6.82694	0.146478	34.2782	0	0	yes
ENSBTAG00000025458	ENSBTAG00000025458	DPF3	10:84501206-84668808	q1	q2	OK	1.98252	0.290403	-2.77121	6.82679	0.146481	5.35502	8.55481e-08	2.0234e-07	yes
ENSBTAG00000014667	ENSBTAG00000014667	PAIP2B	11:13393545-13397285	q1	q2	OK	50.7548	7.43504	-2.77113	6.82643	0.14649	12.1352	0	0	yes
ENSBTAG00000004458	ENSBTAG00000004458	MORN3_BOVIN	17:55844947-55853700	q1	q2	OK	8.88182	1.30231	-2.76978	6.82005	0.146627	11.5895	0	0	yes
ENSBTAG00000030775	ENSBTAG00000030775	Q17QV0_BOVIN	1:147132678-147359843	q1	q2	OK	27.0235	3.9692	-2.7673	6.8083	0.146879	21.2889	0	0	yes
ENSBTAG00000043872	ENSBTAG00000043872	U2	1:97883429-97952160	q1	q2	OK	0.39799	0.0585936	-2.76392	6.79238	0.147224	0.0775424	0.938192	0.953907	no
ENSBTAG00000002786	ENSBTAG00000002786	A6QQH0_BOVIN	21:20082489-20193047	q1	q2	OK	0.762262	0.112257	-2.76348	6.79033	0.147268	5.00364	5.62586e-07	1.25889e-06	yes
ENSBTAG00000045671	ENSBTAG00000045671	-	13:70650513-70651308	q1	q2	OK	1.07257	0.158087	-2.76228	6.78468	0.147391	2.21945	0.0264564	0.0382402	yes
ENSBTAG00000015415	ENSBTAG00000015415	UNC80	2:98024632-98250962	q1	q2	NOTEST	0.0382748	0.00564244	-2.762	6.78338	0.14742	2.03545	0.0418054	1	no
ENSBTAG00000012715	ENSBTAG00000012715	KIF26B	16:32381117-32471604	q1	q2	NOTEST	0.0740355	0.0109173	-2.7616	6.78148	0.14746	1.55601	0.119705	1	no
ENSBTAG00000046598	ENSBTAG00000046598	-	8:22941497-22942085	q1	q2	NOTEST	0.160566	0.0236783	-2.76153	6.78115	0.147468	0.586939	0.557245	1	no
ENSBTAG00000026966	ENSBTAG00000026966	RASSF9	5:15546052-15579641	q1	q2	NOTEST	0.165409	0.0244311	-2.75924	6.77043	0.147702	1.68494	0.0920001	1	no
ENSBTAG00000038439	ENSBTAG00000038439	H10_BOVIN	5:110122672-110124878	q1	q2	OK	70.2118	10.3751	-2.75859	6.76734	0.147768	33.6598	0	0	yes
ENSBTAG00000023891	ENSBTAG00000023891	RBM20	26:31465603-31678528	q1	q2	NOTEST	0.070774	0.0104664	-2.75745	6.76202	0.147885	1.71817	0.0857661	1	no
ENSBTAG00000031538	ENSBTAG00000031538	-	18:48791596-48793845	q1	q2	OK	5.69472	0.842398	-2.75705	6.76013	0.147926	5.39247	6.9495e-08	1.65308e-07	yes
ENSBTAG00000002284	ENSBTAG00000002284	-	7:18508982-18510041	q1	q2	NOTEST	0.262625	0.0388515	-2.75696	6.75971	0.147935	1.49575	0.134718	1	no
ENSBTAG00000018134	ENSBTAG00000018134	AREGB	6:91126255-91138391	q1	q2	OK	16.3561	2.42008	-2.7567	6.7585	0.147962	17.0172	0	0	yes
ENSBTAG00000039012	ENSBTAG00000039012	MFSD6L	19:28908995-28911151	q1	q2	OK	1.13904	0.168976	-2.75292	6.74084	0.14835	4.23982	2.23696e-05	4.43736e-05	yes
ENSBTAG00000010543	ENSBTAG00000010543	FGFR4	7:39936163-39946911	q1	q2	OK	13.5317	2.00746	-2.75289	6.74071	0.148353	22.6419	0	0	yes
ENSBTAG00000017194	ENSBTAG00000017194	ASPG	21:70269909-70292666	q1	q2	NOTEST	0.117071	0.0173803	-2.75186	6.73584	0.148459	1.63176	0.102731	1	no
ENSBTAG00000038548	ENSBTAG00000038548	SLC47A2	19:34503723-34521108	q1	q2	NOTEST	0.208323	0.0309404	-2.75126	6.73304	0.148521	2.30496	0.021169	1	no
ENSBTAG00000011298	ENSBTAG00000011298	EYA1	14:36898121-37268909	q1	q2	OK	0.586153	0.0870595	-2.75121	6.73279	0.148526	4.02175	5.77682e-05	0.000110549	yes
ENSBTAG00000010362	ENSBTAG00000010362	NOSTRIN	2:27317637-27380506	q1	q2	NOTEST	0.122088	0.0181604	-2.74905	6.72276	0.148749	1.63087	0.102918	1	no
ENSBTAG00000017805	ENSBTAG00000017805	EFCAB4A	29:50710075-50739409	q1	q2	OK	3.35404	0.498973	-2.74887	6.72189	0.148767	7.98682	1.33227e-15	4.77281e-15	yes
ENSBTAG00000002309	ENSBTAG00000002309	CSPG5	22:52649428-52661597	q1	q2	OK	2.22753	0.331574	-2.74804	6.71805	0.148853	7.89116	2.88658e-15	1.01996e-14	yes
ENSBTAG00000005301	ENSBTAG00000005301	KLHL32	9:53360138-53421408	q1	q2	OK	9.27147	1.38117	-2.74691	6.71277	0.14897	14.4789	0	0	yes
ENSBTAG00000004494	ENSBTAG00000004494	Q58DI2_BOVIN	5:56179508-56186416	q1	q2	NOTEST	0.0858955	0.012803	-2.7461	6.70901	0.149053	1.77689	0.0755859	1	no
ENSBTAG00000009124	ENSBTAG00000009124	Q5BIR8_BOVIN	29:29274998-29317604	q1	q2	OK	5.85035	0.873234	-2.74408	6.69964	0.149262	11.8414	0	0	yes
ENSBTAG00000038921	ENSBTAG00000038921	F1MMI1_BOVIN	25:206852-208001	q1	q2	OK	0.350682	0.0523474	-2.74398	6.69913	0.149272	0.837441	0.402345	0.467291	no
ENSBTAG00000013105	ENSBTAG00000013105	SYT3	18:57171630-57183964	q1	q2	OK	5.59629	0.836449	-2.74212	6.69053	0.149465	13.3231	0	0	yes
ENSBTAG00000011500	ENSBTAG00000011500	Q3MHM1_BOVIN	3:27658861-27729416	q1	q2	NOTEST	0.130928	0.0195932	-2.74035	6.68232	0.149649	1.74383	0.0811895	1	no
ENSBTAG00000043738	ENSBTAG00000043738	7SK	15:43689412-43689680	q1	q2	OK	5.63666	0.843734	-2.73998	6.68061	0.149687	2.25276	0.0242744	0.0352806	yes
ENSBTAG00000039372	ENSBTAG00000039372	ODF3L2	7:44755703-44760148	q1	q2	OK	0.633784	0.0949263	-2.73911	6.67659	0.149777	1.90437	0.0568623	0.0783929	no
ENSBTAG00000001274	ENSBTAG00000001274	PPM1L_BOVIN	1:107241226-107576086	q1	q2	OK	5.38128	0.806277	-2.7386	6.67423	0.14983	8.62972	0	0	yes
ENSBTAG00000046728	ENSBTAG00000046728	GPR152	29:45985246-45986608	q1	q2	OK	0.446693	0.0669436	-2.73826	6.67268	0.149865	2.76995	0.00560646	0.00879517	yes
ENSBTAG00000000279	ENSBTAG00000000279	RAB26_BOVIN	25:1680109-1686192	q1	q2	OK	54.4963	8.16766	-2.73817	6.6722	0.149875	28.9929	0	0	yes
ENSBTAG00000015176	ENSBTAG00000015176	C6orf201	23:49907475-49930811	q1	q2	OK	3.11895	0.46792	-2.73672	6.66556	0.150026	5.27501	1.32749e-07	3.09659e-07	yes
ENSBTAG00000033278	ENSBTAG00000033278	F1MCC4_BOVIN	7:6097837-6099711	q1	q2	NOTEST	0.231548	0.0347431	-2.73651	6.66458	0.150047	2.0962	0.0360644	1	no
ENSBTAG00000018519	ENSBTAG00000018519	GAS2L2	19:14939571-14946571	q1	q2	NOTEST	0.0798811	0.0119875	-2.73632	6.6637	0.150067	1.30773	0.190965	1	no
ENSBTAG00000020409	ENSBTAG00000020409	Q2TBG1_BOVIN	1:147600281-147615974	q1	q2	OK	0.616931	0.0926103	-2.73587	6.66158	0.150114	3.12857	0.0017566	0.00291268	yes
ENSBTAG00000015299	ENSBTAG00000015299	-	19:50827279-50828335	q1	q2	OK	0.471048	0.070789	-2.73428	6.65425	0.150279	2.03595	0.0417556	0.0587257	no
ENSBTAG00000047748	ENSBTAG00000047748	E1BII0_BOVIN	8:22674398-22674986	q1	q2	NOTEST	0.0962119	0.0144593	-2.73422	6.65398	0.150286	0.357454	0.720752	1	no
ENSBTAG00000001221	ENSBTAG00000001221	NKX3-1	8:71663194-71666501	q1	q2	OK	5.08708	0.764664	-2.73394	6.6527	0.150315	6.40712	1.48294e-10	4.16801e-10	yes
ENSBTAG00000017041	ENSBTAG00000017041	Q95M52_BOVIN	7:12399522-12401644	q1	q2	OK	1.30573	0.19696	-2.72888	6.62942	0.150843	4.38576	1.1558e-05	2.34739e-05	yes
ENSBTAG00000023600	ENSBTAG00000023600	APOD	1:72670962-72684269	q1	q2	NOTEST	0.254483	0.0383975	-2.72848	6.62759	0.150885	1.66163	0.0965877	1	no
ENSBTAG00000006424	ENSBTAG00000006424	TNNI3_BOVIN	18:62717574-62721350	q1	q2	OK	1.41742	0.214056	-2.72721	6.62173	0.151018	3.54243	0.000396462	0.000701811	yes
ENSBTAG00000018252	ENSBTAG00000018252	ARRDC4	21:8924762-8939028	q1	q2	OK	7.40331	1.1195	-2.72531	6.61305	0.151217	16.0394	0	0	yes
ENSBTAG00000017680	ENSBTAG00000017680	F1MY54_BOVIN	4:114375966-114394483	q1	q2	OK	0.630695	0.0954767	-2.72372	6.60575	0.151384	6.27042	3.60078e-10	9.88816e-10	yes
ENSBTAG00000018200	ENSBTAG00000018200	IL15_BOVIN	17:16347924-16363886	q1	q2	OK	0.669708	0.101494	-2.72214	6.5985	0.151549	1.29633	0.194863	0.243862	no
ENSBTAG00000031993	ENSBTAG00000031993	C12orf34	17:65711148-65713710	q1	q2	OK	2.73417	0.414434	-2.72189	6.59736	0.151576	6.54203	6.06881e-11	1.73663e-10	yes
ENSBTAG00000022767	ENSBTAG00000022767	E1B7N8_BOVIN	27:20233577-20234153	q1	q2	NOTEST	0.20628	0.0313275	-2.71911	6.58463	0.151868	0.358433	0.720019	1	no
ENSBTAG00000047045	ENSBTAG00000047045	-	9:54749708-54750219	q1	q2	OK	0.284644	0.0432351	-2.71888	6.58363	0.151892	0.840206	0.400793	0.466121	no
ENSBTAG00000014908	ENSBTAG00000014908	CCL27	8:77368243-77368955	q1	q2	OK	1.86872	0.284178	-2.71718	6.57588	0.152071	1.8377	0.0661059	0.0902114	no
ENSBTAG00000018838	ENSBTAG00000018838	-	4:114562410-114579749	q1	q2	OK	0.991323	0.150851	-2.71623	6.57154	0.152171	5.99574	2.02559e-09	5.30036e-09	yes
ENSBTAG00000015550	ENSBTAG00000015550	MLN	23:7865123-7872669	q1	q2	OK	0.785858	0.119635	-2.71563	6.5688	0.152235	1.83207	0.0669415	0.0912828	no
ENSBTAG00000022058	ENSBTAG00000022058	Q50HZ8_BOVIN	17:66102653-66198865	q1	q2	NOTEST	0.0631712	0.00961811	-2.71544	6.56794	0.152255	2.32714	0.0199578	1	no
ENSBTAG00000013263	ENSBTAG00000013263	E1B918_BOVIN	4:69401000-69402503	q1	q2	OK	6.0545	0.922385	-2.71457	6.56396	0.152347	8.69109	0	0	yes
ENSBTAG00000019385	ENSBTAG00000019385	SCN3A	2:31196565-31283753	q1	q2	OK	1.0775	0.164309	-2.7132	6.55777	0.152491	9.78496	0	0	yes
ENSBTAG00000008464	ENSBTAG00000008464	ABCB9	17:54827285-54851000	q1	q2	OK	4.2659	0.651067	-2.71197	6.55217	0.152621	11.4604	0	0	yes
ENSBTAG00000013863	ENSBTAG00000013863	F1MI99_BOVIN	20:4449108-4452189	q1	q2	OK	117.333	17.9143	-2.71143	6.54968	0.152679	36.2254	0	0	yes
ENSBTAG00000046361	ENSBTAG00000046361	-	10:25221273-25221738	q1	q2	OK	0.626768	0.0957311	-2.71087	6.54717	0.152738	0.825078	0.409327	0.473272	no
ENSBTAG00000031658	ENSBTAG00000031658	SEMA6B	7:20787832-20800309	q1	q2	OK	24.7512	3.78156	-2.71044	6.54524	0.152783	25.9152	0	0	yes
ENSBTAG00000011803	ENSBTAG00000011803	Q8MJU3_BOVIN	19:30230159-30251091	q1	q2	NOTEST	0.16071	0.0245568	-2.71027	6.54442	0.152801	3.63828	0.000274468	1	no
ENSBTAG00000001842	ENSBTAG00000001842	Q2KIV8_BOVIN	3:33768049-33770824	q1	q2	OK	0.845908	0.129413	-2.70852	6.5365	0.152987	2.43041	0.0150818	0.0224269	yes
ENSBTAG00000001903	ENSBTAG00000001903	CB050_BOVIN	11:86614776-86620757	q1	q2	OK	5.20123	0.796056	-2.70791	6.53375	0.153052	4.18745	2.82106e-05	5.54464e-05	yes
ENSBTAG00000001376	ENSBTAG00000001376	RAD21L1	13:60407803-60446557	q1	q2	NOTEST	0.221771	0.0339629	-2.70704	6.5298	0.153144	1.66464	0.0959853	1	no
ENSBTAG00000015125	ENSBTAG00000015125	KLK5	18:57391816-57401354	q1	q2	NOTEST	0.195616	0.0300634	-2.70194	6.50678	0.153686	1.3542	0.175672	1	no
ENSBTAG00000004505	ENSBTAG00000004505	NLRC3	25:2927845-2944136	q1	q2	NOTEST	0.0954357	0.0146675	-2.7019	6.50661	0.153691	1.56912	0.116619	1	no
ENSBTAG00000025035	ENSBTAG00000025035	PRLR	20:39073245-39137480	q1	q2	NOTEST	0.229078	0.0352811	-2.69887	6.49294	0.154014	2.70302	0.00687135	1	no
ENSBTAG00000001804	ENSBTAG00000001804	GPR179	19:39626282-39641576	q1	q2	NOTEST	0.063582	0.00980052	-2.69769	6.48761	0.15414	2.37036	0.0177706	1	no
ENSBTAG00000009137	ENSBTAG00000009137	NKG7_BOVIN	18:57812528-57815281	q1	q2	NOTEST	0.143446	0.0221156	-2.69737	6.48619	0.154174	1.59123	0.111558	1	no
ENSBTAG00000018435	ENSBTAG00000018435	GBRR2_BOVIN	9:61644456-61743739	q1	q2	OK	2.82558	0.436034	-2.69603	6.48018	0.154317	6.60739	3.91156e-11	1.13126e-10	yes
ENSBTAG00000012290	ENSBTAG00000012290	A5D7U4_BOVIN	25:21267919-21291415	q1	q2	NOTEST	0.105445	0.0162767	-2.6956	6.47828	0.154363	1.736	0.0825645	1	no
ENSBTAG00000023976	ENSBTAG00000023976	Q2KJ55_BOVIN	11:67066106-67158230	q1	q2	OK	0.330504	0.051026	-2.69536	6.47717	0.154389	3.47931	0.000502698	0.000880479	yes
ENSBTAG00000015052	ENSBTAG00000015052	PROX2	10:86504030-86512467	q1	q2	OK	0.50631	0.0782125	-2.69455	6.47352	0.154476	3.36145	0.000775356	0.00133222	yes
ENSBTAG00000021709	ENSBTAG00000021709	E1BJR2_BOVIN	15:78402904-78419772	q1	q2	OK	0.838788	0.129753	-2.69254	6.4645	0.154691	4.35819	1.31142e-05	2.65251e-05	yes
ENSBTAG00000047977	ENSBTAG00000047977	-	6:108360269-108372738	q1	q2	OK	0.64028	0.0992703	-2.68927	6.44986	0.155042	2.30251	0.0213066	0.0311481	yes
ENSBTAG00000002695	ENSBTAG00000002695	MYO1H	17:65981417-66022389	q1	q2	NOTEST	0.0637304	0.00988195	-2.68911	6.44917	0.155059	1.73089	0.0834714	1	no
ENSBTAG00000006973	ENSBTAG00000006973	PHF21B	5:116124286-116144383	q1	q2	OK	2.41819	0.375944	-2.68534	6.43231	0.155465	6.91286	4.74953e-12	1.4375e-11	yes
ENSBTAG00000014011	ENSBTAG00000014011	TMOD2	10:58662511-58711813	q1	q2	OK	12.3617	1.92351	-2.68406	6.42664	0.155603	20.7603	0	0	yes
ENSBTAG00000034283	ENSBTAG00000034283	ADAD2	18:10484087-10490337	q1	q2	OK	0.309618	0.0482034	-2.68328	6.42316	0.155687	2.63452	0.00842575	0.012947	yes
ENSBTAG00000013442	ENSBTAG00000013442	A7MBH0_BOVIN	22:49521551-49533582	q1	q2	OK	0.576842	0.0898474	-2.68263	6.42024	0.155757	3.99045	6.59481e-05	0.00012564	yes
ENSBTAG00000001271	ENSBTAG00000001271	A7E350_BOVIN	9:98016581-98064203	q1	q2	NOTEST	0.0814395	0.0126908	-2.68195	6.41721	0.155831	1.32707	0.184487	1	no
ENSBTAG00000003312	ENSBTAG00000003312	CHST15	26:44047736-44081511	q1	q2	NOTEST	0.10449	0.0162872	-2.68155	6.41547	0.155874	1.35039	0.17689	1	no
ENSBTAG00000018397	ENSBTAG00000018397	HHLA2	1:53510438-53521247	q1	q2	OK	2.27794	0.355194	-2.68105	6.41323	0.155928	5.50975	3.5934e-08	8.71979e-08	yes
ENSBTAG00000045587	ENSBTAG00000045587	5S_rRNA	29:50787208-50787314	q1	q2	OK	38.0483	5.93463	-2.6806	6.41123	0.155976	0.988801	0.322761	0.385088	no
ENSBTAG00000015115	ENSBTAG00000015115	ACPT	18:57310722-57315855	q1	q2	OK	4.81792	0.751572	-2.68043	6.41046	0.155995	9.24961	0	0	yes
ENSBTAG00000007569	ENSBTAG00000007569	TNFRSF11A	24:61239108-61275194	q1	q2	OK	2.13782	0.333507	-2.68035	6.41012	0.156003	4.42257	9.75335e-06	1.98831e-05	yes
ENSBTAG00000045026	ENSBTAG00000045026	SNORA70	17:54995288-55006706	q1	q2	OK	6.89492	1.07646	-2.67923	6.40518	0.156125	0.428671	0.668163	0.724114	no
ENSBTAG00000018777	ENSBTAG00000018777	ADCY5	1:68263140-68420954	q1	q2	NOTEST	0.115048	0.0179762	-2.67808	6.40002	0.156249	1.989	0.0467016	1	no
ENSBTAG00000038139	ENSBTAG00000038139	GT253_BOVIN	11:99019927-99029485	q1	q2	OK	31.2896	4.89316	-2.67685	6.39456	0.156382	23.8568	0	0	yes
ENSBTAG00000037526	ENSBTAG00000037526	F1MHQ4_BOVIN	14:46833664-46838053	q1	q2	OK	7.02801	1.10149	-2.67366	6.38046	0.156729	6.72883	1.71037e-11	5.04062e-11	yes
ENSBTAG00000015525	ENSBTAG00000015525	S39AC_BOVIN	13:32666583-32751886	q1	q2	NOTEST	0.0786301	0.0123238	-2.67363	6.38035	0.156732	1.71862	0.0856829	1	no
ENSBTAG00000043553	ENSBTAG00000043553	GPX3	7:64286947-64295116	q1	q2	OK	8.58436	1.34552	-2.67354	6.37996	0.156742	13.3538	0	0	yes
ENSBTAG00000013141	ENSBTAG00000013141	Q2TBH3_BOVIN	1:98396411-98398345	q1	q2	OK	5.77237	0.905041	-2.67311	6.37802	0.156788	10.1152	0	0	yes
ENSBTAG00000014100	ENSBTAG00000014100	BAIAP3	25:1054500-1066815	q1	q2	OK	1.93343	0.303227	-2.6727	6.37618	0.156833	10.0442	0	0	yes
ENSBTAG00000026986	ENSBTAG00000026986	TTN	2:18054942-18329808	q1	q2	NOTEST	0.0165481	0.00259853	-2.6709	6.36825	0.157029	5.07619	3.85085e-07	1	no
ENSBTAG00000000718	ENSBTAG00000000718	TMPRSS9	7:22458602-22488765	q1	q2	OK	0.628684	0.098729	-2.67079	6.36777	0.157041	5.48654	4.09878e-08	9.90183e-08	yes
ENSBTAG00000018413	ENSBTAG00000018413	FA46B_BOVIN	2:126799590-126807056	q1	q2	OK	38.7196	6.08071	-2.67075	6.36761	0.157045	28.6537	0	0	yes
ENSBTAG00000047972	ENSBTAG00000047972	C1orf106	16:81368725-81379604	q1	q2	OK	5.96276	0.937717	-2.66875	6.35881	0.157263	10.7175	0	0	yes
ENSBTAG00000009907	ENSBTAG00000009907	MAPK4	24:50684777-50745042	q1	q2	OK	4.14892	0.653014	-2.66755	6.35349	0.157394	10.2611	0	0	yes
ENSBTAG00000016913	ENSBTAG00000016913	AVIL	5:55986060-56002079	q1	q2	OK	1.90298	0.299881	-2.6658	6.34578	0.157585	8.94784	0	0	yes
ENSBTAG00000026796	ENSBTAG00000026796	-	15:52287688-52290947	q1	q2	OK	0.681559	0.107431	-2.66542	6.34416	0.157626	2.26601	0.023451	0.0341419	yes
ENSBTAG00000010427	ENSBTAG00000010427	RASSF5	16:4144348-4218744	q1	q2	OK	11.7825	1.85725	-2.6654	6.34406	0.157628	22.4476	0	0	yes
ENSBTAG00000010164	ENSBTAG00000010164	ESPNL	3:118074854-118096926	q1	q2	OK	1.50635	0.237736	-2.66363	6.33623	0.157822	7.87806	3.33067e-15	1.17305e-14	yes
ENSBTAG00000015361	ENSBTAG00000015361	CNTFR	8:77260360-77298847	q1	q2	OK	2.42201	0.382319	-2.66336	6.33505	0.157852	6.70336	2.03675e-11	5.97976e-11	yes
ENSBTAG00000044083	ENSBTAG00000044083	LIMK1	25:33750877-33775707	q1	q2	OK	21.858	3.45117	-2.66301	6.3335	0.15789	23.0294	0	0	yes
ENSBTAG00000011798	ENSBTAG00000011798	A7MB32_BOVIN	5:82972062-83055263	q1	q2	OK	44.4061	7.01506	-2.66223	6.33011	0.157975	34.4643	0	0	yes
ENSBTAG00000016053	ENSBTAG00000016053	ARSA_BOVIN	5:120152352-120155489	q1	q2	OK	85.6716	13.5389	-2.6617	6.32781	0.158033	32.0665	0	0	yes
ENSBTAG00000046365	ENSBTAG00000046365	-	18:48769011-48771241	q1	q2	OK	7.16624	1.13299	-2.66108	6.32507	0.158101	5.92363	3.1492e-09	8.14229e-09	yes
ENSBTAG00000013364	ENSBTAG00000013364	LIPM	26:10504439-10540469	q1	q2	OK	1.17223	0.185331	-2.66108	6.32506	0.158101	4.2596	2.0479e-05	4.07375e-05	yes
ENSBTAG00000038124	ENSBTAG00000038124	A8DC37_BOVIN	3:8033834-8040506	q1	q2	OK	2.00927	0.317827	-2.66035	6.3219	0.158181	4.68322	2.82403e-06	6.00697e-06	yes
ENSBTAG00000021127	ENSBTAG00000021127	GNA14_BOVIN	8:53686441-53949026	q1	q2	NOTEST	0.150816	0.0238801	-2.65891	6.31555	0.158339	1.51049	0.130918	1	no
ENSBTAG00000031377	ENSBTAG00000031377	SYCP2L	23:45119090-45181407	q1	q2	NOTEST	0.117516	0.018649	-2.65568	6.30146	0.158694	2.14799	0.0317146	1	no
ENSBTAG00000045588	ENSBTAG00000045588	-	7:5655108-5659111	q1	q2	OK	19.1598	3.04356	-2.65425	6.29519	0.158851	23.071	0	0	yes
ENSBTAG00000016032	ENSBTAG00000016032	-	11:44707027-44711889	q1	q2	OK	0.345012	0.0548275	-2.65368	6.29268	0.158914	1.70159	0.0888318	0.119163	no
ENSBTAG00000038291	ENSBTAG00000038291	E1B9E7_BOVIN	8:8603816-8614097	q1	q2	OK	0.359784	0.057202	-2.65299	6.28971	0.15899	1.64995	0.0989538	0.13169	no
ENSBTAG00000006198	ENSBTAG00000006198	-	10:26963200-26964130	q1	q2	NOTEST	0.0757861	0.0120553	-2.65227	6.28654	0.15907	0.542441	0.587515	1	no
ENSBTAG00000013632	ENSBTAG00000013632	GRM4	23:8084929-8188237	q1	q2	OK	0.32137	0.051161	-2.65112	6.28154	0.159196	3.50355	0.000459095	0.000807586	yes
ENSBTAG00000031453	ENSBTAG00000031453	C20orf160	13:62068568-62087750	q1	q2	OK	1.20512	0.191912	-2.65066	6.27954	0.159247	5.19286	2.07093e-07	4.776e-07	yes
ENSBTAG00000012158	ENSBTAG00000012158	CA158_BOVIN	16:56187895-56219814	q1	q2	NOTEST	0.228816	0.0364382	-2.65066	6.27956	0.159247	1.70018	0.0890976	1	no
ENSBTAG00000026383	ENSBTAG00000026383	-	25:4133642-4168723	q1	q2	OK	0.890037	0.141777	-2.65025	6.27772	0.159292	4.01633	5.91113e-05	0.000113039	yes
ENSBTAG00000008483	ENSBTAG00000008483	CALCRL	2:8901431-9030989	q1	q2	NOTEST	0.0819763	0.0130617	-2.64987	6.27608	0.159334	1.65788	0.0973415	1	no
ENSBTAG00000037793	ENSBTAG00000037793	E1BAA6_BOVIN	11:89100477-89101344	q1	q2	NOTEST	0.121905	0.0194275	-2.64958	6.27487	0.159366	0.218025	0.82741	1	no
ENSBTAG00000046637	ENSBTAG00000046637	ZBED2	1:56722580-56818961	q1	q2	OK	0.372991	0.0594474	-2.64945	6.2743	0.159381	1.60039	0.109512	0.144523	no
ENSBTAG00000046649	ENSBTAG00000046649	SGPP2	2:111402466-111492915	q1	q2	NOTEST	0.24702	0.0394119	-2.64793	6.26765	0.159549	1.6978	0.0895463	1	no
ENSBTAG00000014953	ENSBTAG00000014953	-	18:61318605-61401807	q1	q2	NOTEST	0.0209496	0.00335416	-2.6429	6.24586	0.160106	0.328061	0.742866	1	no
ENSBTAG00000044425	ENSBTAG00000044425	SCARNA14	10:13195493-13212891	q1	q2	OK	7.55975	1.21067	-2.64253	6.24427	0.160147	0.516758	0.605325	0.665907	no
ENSBTAG00000039302	ENSBTAG00000039302	B2Z4B4_BOVIN	7:15880797-15884598	q1	q2	OK	18.0359	2.89117	-2.64115	6.23827	0.1603	17.781	0	0	yes
ENSBTAG00000046074	ENSBTAG00000046074	-	13:2800006-2802674	q1	q2	NOTEST	0.269822	0.0432587	-2.64095	6.2374	0.160323	0.255364	0.798442	1	no
ENSBTAG00000033547	ENSBTAG00000033547	CD045_BOVIN	17:40936425-41144357	q1	q2	NOTEST	0.0654972	0.0105069	-2.6401	6.23373	0.160417	0.409828	0.681932	1	no
ENSBTAG00000011402	ENSBTAG00000011402	-	8:60056193-60120722	q1	q2	NOTEST	0.262206	0.0420741	-2.63969	6.232	0.160463	3.6181	0.000296779	1	no
ENSBTAG00000006231	ENSBTAG00000006231	ACBG1_BOVIN	21:31081076-31140268	q1	q2	NOTEST	0.0791455	0.0127017	-2.63949	6.2311	0.160485	1.1322	0.257549	1	no
ENSBTAG00000008542	ENSBTAG00000008542	-	4:113437376-113490743	q1	q2	OK	1.25413	0.201293	-2.63931	6.23037	0.160505	16.7164	0	0	yes
ENSBTAG00000043973	ENSBTAG00000043973	LIN28B	9:45543365-45593061	q1	q2	OK	0.482097	0.0777675	-2.63208	6.19921	0.161311	1.57523	0.115204	0.151483	no
ENSBTAG00000013974	ENSBTAG00000013974	TM215_BOVIN	8:11198677-11204065	q1	q2	NOTEST	0.0767962	0.0124133	-2.62915	6.18661	0.161639	2.1306	0.0331218	1	no
ENSBTAG00000016365	ENSBTAG00000016365	F1N3L2_BOVIN	11:26124238-26156411	q1	q2	NOTEST	0.10131	0.0163908	-2.62782	6.18091	0.161788	1.32672	0.1846	1	no
ENSBTAG00000034384	ENSBTAG00000034384	VWA3B	11:3366419-3528949	q1	q2	OK	8.2743	1.33884	-2.62766	6.1802	0.161806	17.6996	0	0	yes
ENSBTAG00000001132	ENSBTAG00000001132	GTDC1_BOVIN	2:52584333-52897314	q1	q2	OK	9.26598	1.50612	-2.62111	6.15222	0.162543	13.3294	0	0	yes
ENSBTAG00000022671	ENSBTAG00000022671	WNT4	2:131304771-131315806	q1	q2	OK	0.982215	0.159759	-2.62014	6.1481	0.162652	3.27993	0.00103831	0.00176097	yes
ENSBTAG00000021158	ENSBTAG00000021158	A7MB41_BOVIN	1:157169739-157261755	q1	q2	NOTEST	0.0652317	0.0106102	-2.62013	6.14802	0.162653	1.62581	0.103989	1	no
ENSBTAG00000000581	ENSBTAG00000000581	DOCK10	2:113649873-113891180	q1	q2	NOTEST	0.0450745	0.0073388	-2.6187	6.14194	0.162814	1.76676	0.0772685	1	no
ENSBTAG00000008091	ENSBTAG00000008091	SBP1_BOVIN	3:19484699-19493477	q1	q2	OK	64.1521	10.4491	-2.61811	6.13949	0.162881	29.8115	0	0	yes
ENSBTAG00000007827	ENSBTAG00000007827	RCOR2	29:42868377-42872337	q1	q2	OK	9.25012	1.50732	-2.61748	6.1368	0.162952	14.1534	0	0	yes
ENSBTAG00000032782	ENSBTAG00000032782	INSC	15:37874413-38013439	q1	q2	OK	1.0854	0.176877	-2.61741	6.13647	0.16296	5.02387	5.06418e-07	1.13665e-06	yes
ENSBTAG00000046247	ENSBTAG00000046247	-	29:27338163-27339246	q1	q2	OK	1.86011	0.303133	-2.61736	6.13628	0.162966	4.9508	7.39098e-07	1.64078e-06	yes
ENSBTAG00000046235	ENSBTAG00000046235	SRSF12	9:61890329-61907177	q1	q2	OK	34.7957	5.67098	-2.61724	6.13575	0.162979	17.6833	0	0	yes
ENSBTAG00000007228	ENSBTAG00000007228	Q52T66_BOVIN	5:111106427-111123047	q1	q2	OK	10.998	1.79246	-2.61723	6.1357	0.16298	9.63104	0	0	yes
ENSBTAG00000047930	ENSBTAG00000047930	UBE2E2	27:42203625-42288998	q1	q2	OK	20.2532	3.30277	-2.6164	6.13219	0.163074	14.1299	0	0	yes
ENSBTAG00000016189	ENSBTAG00000016189	-	16:55466078-55466692	q1	q2	OK	1.23784	0.201912	-2.61603	6.13059	0.163116	2.46911	0.0135449	0.0202843	yes
ENSBTAG00000019343	ENSBTAG00000019343	MDFI	23:15467449-15482249	q1	q2	OK	0.977763	0.159541	-2.61556	6.1286	0.163169	3.20775	0.0013378	0.00224317	yes
ENSBTAG00000005477	ENSBTAG00000005477	LAPM5_BOVIN	2:123350417-123376541	q1	q2	OK	2.84772	0.464745	-2.61529	6.12749	0.1632	6.30629	2.85798e-10	7.89366e-10	yes
ENSBTAG00000044204	ENSBTAG00000044204	CD79B	19:48784793-48787753	q1	q2	OK	0.297075	0.0485056	-2.61461	6.12455	0.163277	1.54716	0.121826	0.159441	no
ENSBTAG00000020095	ENSBTAG00000020095	MS4A3	15:84485247-84492848	q1	q2	OK	0.62146	0.101679	-2.61164	6.11198	0.163613	1.86008	0.0628741	0.0861407	no
ENSBTAG00000000920	ENSBTAG00000000920	DNAH17	19:54312242-54441590	q1	q2	OK	0.433868	0.0710089	-2.61118	6.11005	0.163665	8.73783	0	0	yes
ENSBTAG00000033835	ENSBTAG00000033835	MYP0_BOVIN	3:8229235-8234089	q1	q2	NOTEST	0.138804	0.0227311	-2.6103	6.10635	0.163765	1.6525	0.0984323	1	no
ENSBTAG00000038549	ENSBTAG00000038549	F1MCD3_BOVIN	7:8467759-8490669	q1	q2	NOTEST	0.17571	0.0288015	-2.60898	6.10072	0.163915	1.68277	0.0924202	1	no
ENSBTAG00000004721	ENSBTAG00000004721	GSG1	5:97239156-97258621	q1	q2	OK	0.282646	0.0463599	-2.60804	6.09678	0.164022	2.18687	0.0287521	0.0413452	yes
ENSBTAG00000014832	ENSBTAG00000014832	TEFF2_BOVIN	2:80997736-81275827	q1	q2	OK	5.3892	0.885257	-2.6059	6.08772	0.164265	11.2474	0	0	yes
ENSBTAG00000012618	ENSBTAG00000012618	SLC23A3	2:107836178-107842357	q1	q2	OK	0.357158	0.058723	-2.60456	6.08208	0.164418	2.85099	0.00435832	0.00692123	yes
ENSBTAG00000026194	ENSBTAG00000026194	AMZ1	25:41183194-41190361	q1	q2	OK	0.392751	0.064624	-2.60347	6.07748	0.164542	2.81044	0.00494733	0.00780708	yes
ENSBTAG00000018682	ENSBTAG00000018682	SETD4	1:150025826-150048269	q1	q2	NOTEST	0.142146	0.0234193	-2.60161	6.06961	0.164755	1.61208	0.106944	1	no
ENSBTAG00000003380	ENSBTAG00000003380	E1BEH3_BOVIN	13:73866813-73872277	q1	q2	OK	0.400339	0.06605	-2.59959	6.06115	0.164985	2.18269	0.0290587	0.0417567	yes
ENSBTAG00000042416	ENSBTAG00000042416	7SK	19:33577135-33577456	q1	q2	NOTEST	0.226601	0.0374143	-2.59849	6.05653	0.165111	0.279867	0.779579	1	no
ENSBTAG00000046750	ENSBTAG00000046750	A4IFK5_BOVIN	7:5271364-5291295	q1	q2	OK	9.74506	1.61027	-2.59737	6.05182	0.165239	16.6951	0	0	yes
ENSBTAG00000008545	ENSBTAG00000008545	ATF3_BOVIN	16:72820025-72832974	q1	q2	OK	173.284	28.6463	-2.59672	6.04909	0.165314	36.1287	0	0	yes
ENSBTAG00000012171	ENSBTAG00000012171	F1MH37_BOVIN	2:86340777-86341872	q1	q2	NOTEST	0.0914313	0.0151318	-2.5951	6.04233	0.1655	0.807385	0.419445	1	no
ENSBTAG00000017055	ENSBTAG00000017055	HCN3	3:15409812-15418775	q1	q2	OK	0.455173	0.0754358	-2.59309	6.03391	0.16573	3.84359	0.000121248	0.000224781	yes
ENSBTAG00000017251	ENSBTAG00000017251	SLC26A8	23:9853165-9942504	q1	q2	NOTEST	0.155209	0.0257504	-2.59155	6.02744	0.165907	2.44955	0.0143037	1	no
ENSBTAG00000021428	ENSBTAG00000021428	CNDP1	24:4231233-4259140	q1	q2	OK	0.513628	0.0852982	-2.59013	6.02156	0.166071	4.68757	2.76465e-06	5.88529e-06	yes
ENSBTAG00000012234	ENSBTAG00000012234	RHBG_BOVIN	3:14493714-14507416	q1	q2	OK	2.03329	0.337672	-2.59012	6.02149	0.166072	6.82643	8.70526e-12	2.59943e-11	yes
ENSBTAG00000039765	ENSBTAG00000039765	-	19:50867136-50881235	q1	q2	NOTEST	0.279787	0.0464951	-2.58918	6.01756	0.16618	1.33804	0.180884	1	no
ENSBTAG00000047626	ENSBTAG00000047626	-	17:75054451-75056174	q1	q2	OK	0.309499	0.051447	-2.58877	6.01588	0.166227	1.52779	0.126566	0.165286	no
ENSBTAG00000011601	ENSBTAG00000011601	ST3GAL5	11:48848623-48905318	q1	q2	OK	7.04695	1.17173	-2.58836	6.01414	0.166275	11.8668	0	0	yes
ENSBTAG00000010517	ENSBTAG00000010517	EVPL	19:56256888-56274684	q1	q2	OK	1.54772	0.257696	-2.5864	6.00599	0.166501	11.666	0	0	yes
ENSBTAG00000019683	ENSBTAG00000019683	LYPD6B	2:47068950-47099371	q1	q2	OK	6.99678	1.16506	-2.58629	6.00551	0.166513	7.59004	3.19744e-14	1.07471e-13	yes
ENSBTAG00000019567	ENSBTAG00000019567	IL21R	25:25233185-25268874	q1	q2	OK	4.60842	0.767527	-2.58598	6.00424	0.166549	13.0523	0	0	yes
ENSBTAG00000031395	ENSBTAG00000031395	CD048_BOVIN	6:109868826-109870154	q1	q2	OK	31.5744	5.25939	-2.58579	6.00343	0.166571	6.79885	1.0546e-11	3.13815e-11	yes
ENSBTAG00000020667	ENSBTAG00000020667	KCNQ3_BOVIN	14:9793485-10085181	q1	q2	NOTEST	0.234192	0.0390326	-2.58494	5.99991	0.166669	2.72443	0.00644125	1	no
ENSBTAG00000015232	ENSBTAG00000015232	RAPGEFL1	19:41109869-41122210	q1	q2	OK	5.88917	0.981844	-2.5845	5.99807	0.16672	13.2568	0	0	yes
ENSBTAG00000021430	ENSBTAG00000021430	UPK3B_BOVIN	25:35018573-35023604	q1	q2	OK	9.71517	1.61979	-2.58443	5.9978	0.166728	16.9224	0	0	yes
ENSBTAG00000006262	ENSBTAG00000006262	LIMS2_BOVIN	2:4780175-4819192	q1	q2	OK	5.56555	0.928313	-2.58384	5.99534	0.166796	11.4298	0	0	yes
ENSBTAG00000004275	ENSBTAG00000004275	A6QL81_BOVIN	15:41241521-41291990	q1	q2	OK	153.013	25.5249	-2.58368	5.99466	0.166815	36.6401	0	0	yes
ENSBTAG00000004086	ENSBTAG00000004086	Q2KJJ7_BOVIN	10:36490426-36504314	q1	q2	OK	0.481737	0.0803823	-2.5833	5.99307	0.166859	4.02007	5.81799e-05	0.000111323	yes
ENSBTAG00000023784	ENSBTAG00000023784	TM88B_BOVIN	16:52240500-52373541	q1	q2	OK	1.17531	0.196703	-2.57895	5.97505	0.167363	6.45359	1.0923e-10	3.08928e-10	yes
ENSBTAG00000002392	ENSBTAG00000002392	ANK2	6:13389037-13529927	q1	q2	OK	1.27021	0.212752	-2.57782	5.97038	0.167494	9.63099	0	0	yes
ENSBTAG00000008946	ENSBTAG00000008946	CAPN13	11:69045267-69128762	q1	q2	OK	1.10334	0.184951	-2.57666	5.96558	0.167629	5.67824	1.36092e-08	3.38937e-08	yes
ENSBTAG00000001076	ENSBTAG00000001076	NLRP6	11:107214413-107220027	q1	q2	NOTEST	0.126199	0.021155	-2.57663	5.96545	0.167632	1.62326	0.104534	1	no
ENSBTAG00000031358	ENSBTAG00000031358	DPYD	3:45563731-46487165	q1	q2	OK	3.82592	0.641533	-2.57621	5.96372	0.167681	15.3737	0	0	yes
ENSBTAG00000019093	ENSBTAG00000019093	F1MJQ3_BOVIN	3:39926297-39948945	q1	q2	OK	2.36135	0.396236	-2.57518	5.95945	0.167801	7.76202	8.43769e-15	2.92176e-14	yes
ENSBTAG00000046227	ENSBTAG00000046227	-	7:92872310-92873366	q1	q2	NOTEST	0.237734	0.0399237	-2.57403	5.95471	0.167934	1.29562	0.195106	1	no
ENSBTAG00000012771	ENSBTAG00000012771	A7Z067_BOVIN	7:63379474-63410973	q1	q2	NOTEST	0.162835	0.0273465	-2.57398	5.95451	0.16794	2.47793	0.0132147	1	no
ENSBTAG00000021768	ENSBTAG00000021768	E1BIN6_BOVIN	6:93746806-93758039	q1	q2	OK	13.2999	2.23499	-2.57307	5.95076	0.168046	19.8612	0	0	yes
ENSBTAG00000020895	ENSBTAG00000020895	LOXL4_BOVIN	26:19201798-19214350	q1	q2	OK	5.436	0.914011	-2.57226	5.94741	0.168141	12.6828	0	0	yes
ENSBTAG00000034680	ENSBTAG00000034680	FAM131C	2:136610243-136617316	q1	q2	OK	30.1052	5.06275	-2.57202	5.94641	0.168169	17.3904	0	0	yes
ENSBTAG00000034024	ENSBTAG00000034024	E1BAP8_BOVIN	25:192904-194061	q1	q2	NOTEST	0.210522	0.035425	-2.57113	5.94275	0.168272	0.785601	0.432101	1	no
ENSBTAG00000030993	ENSBTAG00000030993	LCA5L_BOVIN	1:140971622-141013360	q1	q2	NOTEST	0.195674	0.0329538	-2.56993	5.93783	0.168412	2.0363	0.0417205	1	no
ENSBTAG00000016202	ENSBTAG00000016202	TREH	15:29837811-29849676	q1	q2	NOTEST	0.100354	0.0169054	-2.56954	5.93621	0.168458	1.55801	0.11923	1	no
ENSBTAG00000003297	ENSBTAG00000003297	OASL	17:65446986-65463409	q1	q2	NOTEST	0.0497281	0.00837788	-2.5694	5.93564	0.168474	1.01876	0.308315	1	no
ENSBTAG00000017263	ENSBTAG00000017263	Q0VCQ3_BOVIN	26:31041195-31135072	q1	q2	OK	7.63622	1.28794	-2.56779	5.92902	0.168662	18.2953	0	0	yes
ENSBTAG00000000582	ENSBTAG00000000582	A2VDW0_BOVIN	23:27414401-27416344	q1	q2	OK	2.66422	0.449657	-2.56682	5.92501	0.168776	5.43374	5.51846e-08	1.32254e-07	yes
ENSBTAG00000047231	ENSBTAG00000047231	TNNI1	16:49293851-49303508	q1	q2	OK	3.57497	0.604273	-2.56466	5.91615	0.169029	5.39096	7.00837e-08	1.66611e-07	yes
ENSBTAG00000017938	ENSBTAG00000017938	-	13:43833786-43840023	q1	q2	NOTEST	0.259448	0.0438802	-2.5638	5.91264	0.169129	1.27246	0.203208	1	no
ENSBTAG00000033190	ENSBTAG00000033190	A6QNJ7_BOVIN	8:44682698-44892128	q1	q2	NOTEST	0.110009	0.0186083	-2.5636	5.91182	0.169153	2.18369	0.0289849	1	no
ENSBTAG00000011888	ENSBTAG00000011888	CCDC24	3:102623729-102659082	q1	q2	OK	36.2929	6.14078	-2.56319	5.91014	0.169201	19.6669	0	0	yes
ENSBTAG00000012347	ENSBTAG00000012347	OSTA_BOVIN	1:71417009-71484412	q1	q2	OK	0.477354	0.0808582	-2.56159	5.90359	0.169389	2.87742	0.0040094	0.00638896	yes
ENSBTAG00000009830	ENSBTAG00000009830	Q2KJC2_BOVIN	15:53907205-53922643	q1	q2	OK	17.3983	2.94809	-2.56109	5.90155	0.169447	22.1431	0	0	yes
ENSBTAG00000009654	ENSBTAG00000009654	F1MRZ9_BOVIN	8:102051153-102141484	q1	q2	NOTEST	0.246388	0.0418396	-2.55799	5.88887	0.169812	1.90253	0.057102	1	no
ENSBTAG00000005103	ENSBTAG00000005103	FEZF1	4:87501283-87503583	q1	q2	OK	0.813512	0.138206	-2.55735	5.88623	0.169887	3.69391	0.000220831	0.000399786	yes
ENSBTAG00000047932	ENSBTAG00000047932	-	15:28926759-28963808	q1	q2	OK	0.293809	0.0499511	-2.55629	5.88193	0.170012	0.498057	0.618444	0.677991	no
ENSBTAG00000024773	ENSBTAG00000024773	POU3F2	9:51596536-51601433	q1	q2	OK	1.46226	0.248613	-2.55623	5.88167	0.170019	3.09251	0.0019847	0.00327091	yes
ENSBTAG00000044035	ENSBTAG00000044035	GPRIN1	7:39423155-39426047	q1	q2	OK	2.44948	0.416469	-2.55619	5.88154	0.170024	10.0092	0	0	yes
ENSBTAG00000001003	ENSBTAG00000001003	F1MJT6_BOVIN	7:83554314-83579633	q1	q2	OK	1.18555	0.202012	-2.55305	5.86871	0.170394	4.62262	3.7893e-06	7.97571e-06	yes
ENSBTAG00000037410	ENSBTAG00000037410	A6QPG2_BOVIN	22:49603517-49607502	q1	q2	OK	0.449232	0.0767541	-2.54914	5.85287	0.170857	1.5731	0.115696	0.152043	no
ENSBTAG00000045578	ENSBTAG00000045578	AGR3	4:25316892-25333477	q1	q2	OK	0.42124	0.0720304	-2.54796	5.84809	0.170997	1.57325	0.11566	0.152008	no
ENSBTAG00000020590	ENSBTAG00000020590	FZD2	19:44954981-44956760	q1	q2	OK	7.49552	1.28177	-2.54789	5.84779	0.171005	13.2275	0	0	yes
ENSBTAG00000008380	ENSBTAG00000008380	F1N157_BOVIN	10:15103980-15196986	q1	q2	NOTEST	0.045594	0.00780137	-2.54705	5.84436	0.171105	1.61568	0.106163	1	no
ENSBTAG00000017528	ENSBTAG00000017528	SNAI3	18:13958994-13964622	q1	q2	NOTEST	0.251453	0.0430416	-2.54649	5.84209	0.171171	1.61548	0.106206	1	no
ENSBTAG00000002834	ENSBTAG00000002834	CCDC69	7:64435992-64471401	q1	q2	OK	5.01575	0.858911	-2.54589	5.83966	0.171242	14.5874	0	0	yes
ENSBTAG00000007969	ENSBTAG00000007969	CIDEC	22:16909072-16918353	q1	q2	NOTEST	0.278817	0.0477535	-2.54564	5.83867	0.171272	1.6757	0.0937977	1	no
ENSBTAG00000020705	ENSBTAG00000020705	PRSS12	6:7944015-8020932	q1	q2	OK	0.554273	0.0949471	-2.5454	5.8377	0.1713	4.78623	1.69943e-06	3.67685e-06	yes
ENSBTAG00000021483	ENSBTAG00000021483	Q58D44_BOVIN	15:45836412-45866755	q1	q2	OK	0.346035	0.059286	-2.54516	5.83671	0.171329	1.8338	0.0666834	0.0909767	no
ENSBTAG00000009739	ENSBTAG00000009739	CSMD1	27:1019177-1424171	q1	q2	NOTEST	0.0169527	0.00291051	-2.54217	5.82465	0.171684	1.53642	0.124435	1	no
ENSBTAG00000023002	ENSBTAG00000023002	JPH2	13:73303265-73375173	q1	q2	OK	0.819096	0.140713	-2.54128	5.82104	0.17179	4.77313	1.81388e-06	3.91408e-06	yes
ENSBTAG00000015915	ENSBTAG00000015915	SBSN_BOVIN	18:46358552-46363200	q1	q2	OK	0.401802	0.0690362	-2.54106	5.82016	0.171816	2.96326	0.00304394	0.00491259	yes
ENSBTAG00000010802	ENSBTAG00000010802	E1B9M4_BOVIN	29:44439782-44442568	q1	q2	OK	0.842869	0.145062	-2.53864	5.81041	0.172105	3.25902	0.00111797	0.00188976	yes
ENSBTAG00000037013	ENSBTAG00000037013	U1	21:45387108-45387272	q1	q2	OK	23.3032	4.01637	-2.53656	5.80206	0.172353	2.28607	0.0222501	0.0324778	yes
ENSBTAG00000026481	ENSBTAG00000026481	RGS8	16:65184210-65210675	q1	q2	OK	2.43401	0.420581	-2.53288	5.78726	0.172793	5.48608	4.10956e-08	9.9264e-08	yes
ENSBTAG00000005996	ENSBTAG00000005996	Q32KZ3_BOVIN	28:43426275-43657765	q1	q2	NOTEST	0.0487138	0.00842691	-2.53126	5.78074	0.172988	0.493147	0.621909	1	no
ENSBTAG00000016424	ENSBTAG00000016424	MMP25	25:2478688-2488857	q1	q2	OK	2.14927	0.372247	-2.52952	5.77377	0.173196	7.58326	3.37508e-14	1.13254e-13	yes
ENSBTAG00000011178	ENSBTAG00000011178	A3KN55_BOVIN	22:47609790-47625159	q1	q2	OK	0.332694	0.0576623	-2.5285	5.7697	0.173319	2.8393	0.00452131	0.00716469	yes
ENSBTAG00000004732	ENSBTAG00000004732	SPTB	10:77201410-77273590	q1	q2	OK	4.78284	0.829039	-2.52836	5.76914	0.173336	20.6612	0	0	yes
ENSBTAG00000013210	ENSBTAG00000013210	ADAMTS4	3:8322937-8331146	q1	q2	NOTEST	0.0754026	0.0130862	-2.52657	5.76199	0.173551	1.23877	0.215432	1	no
ENSBTAG00000003877	ENSBTAG00000003877	ZCCHC24	28:35189621-35251005	q1	q2	OK	8.50173	1.47569	-2.52637	5.76119	0.173575	11.0681	0	0	yes
ENSBTAG00000046013	ENSBTAG00000046013	SSLP1	29:29453499-29459846	q1	q2	OK	4.39439	0.762996	-2.52591	5.75939	0.17363	3.51246	0.000443986	0.000782532	yes
ENSBTAG00000004982	ENSBTAG00000004982	GPLD1	23:32984455-33036038	q1	q2	OK	0.555117	0.0964299	-2.52524	5.75669	0.173711	4.32526	1.52354e-05	3.06365e-05	yes
ENSBTAG00000025167	ENSBTAG00000025167	ABHD15	19:21378076-21382996	q1	q2	OK	1.15379	0.200477	-2.52488	5.75522	0.173754	4.53551	5.74658e-06	1.19348e-05	yes
ENSBTAG00000007010	ENSBTAG00000007010	-	26:45525118-45526546	q1	q2	NOTEST	0.172279	0.0299425	-2.52448	5.75366	0.173802	1.20577	0.227907	1	no
ENSBTAG00000006618	ENSBTAG00000006618	E1BFR1_BOVIN	19:5696797-5747138	q1	q2	OK	10.5276	1.8319	-2.52277	5.74682	0.174009	10.6328	0	0	yes
ENSBTAG00000018572	ENSBTAG00000018572	F1MRU0_BOVIN	12:32240343-32293156	q1	q2	OK	0.291002	0.0507323	-2.52005	5.73603	0.174337	3.43137	0.000600536	0.00104453	yes
ENSBTAG00000005892	ENSBTAG00000005892	ZAP70	11:3016324-3056118	q1	q2	NOTEST	0.118839	0.0207264	-2.51947	5.7337	0.174407	2.52385	0.0116077	1	no
ENSBTAG00000019844	ENSBTAG00000019844	ZNF467	4:113425035-113431085	q1	q2	OK	0.710485	0.124261	-2.51543	5.71768	0.174896	4.13616	3.5317e-05	6.8815e-05	yes
ENSBTAG00000031359	ENSBTAG00000031359	-	8:87001643-87007946	q1	q2	OK	0.468164	0.0821722	-2.51029	5.69735	0.17552	5.11417	3.15119e-07	7.17375e-07	yes
ENSBTAG00000033580	ENSBTAG00000033580	MSLNL	25:653104-660655	q1	q2	OK	0.826848	0.145137	-2.51021	5.69702	0.17553	5.08235	3.72801e-07	8.45021e-07	yes
ENSBTAG00000022890	ENSBTAG00000022890	MBP	24:2558225-2590450	q1	q2	NOTEST	0.110699	0.0194312	-2.51019	5.69697	0.175532	1.58559	0.112832	1	no
ENSBTAG00000019665	ENSBTAG00000019665	IL1RA_BOVIN	11:46699165-46706152	q1	q2	OK	23.9732	4.21123	-2.50911	5.69268	0.175664	21.8049	0	0	yes
ENSBTAG00000027684	ENSBTAG00000027684	Q0VCN9_BOVIN	15:52602818-52605536	q1	q2	NOTEST	0.187287	0.0329489	-2.50695	5.68417	0.175927	1.46773	0.142177	1	no
ENSBTAG00000003700	ENSBTAG00000003700	SC5AA_BOVIN	19:34817324-34872403	q1	q2	OK	1.31634	0.231648	-2.50653	5.6825	0.175978	6.09911	1.06659e-09	2.84773e-09	yes
ENSBTAG00000008700	ENSBTAG00000008700	CRCT1	3:18222997-18224799	q1	q2	OK	0.764261	0.134522	-2.50622	5.68131	0.176016	2.01918	0.0434684	0.0610186	no
ENSBTAG00000013148	ENSBTAG00000013148	CLD1_BOVIN	1:77596385-77611958	q1	q2	OK	13.9937	2.46834	-2.50316	5.66928	0.17639	14.4174	0	0	yes
ENSBTAG00000001730	ENSBTAG00000001730	ODF3	11:107150454-107154002	q1	q2	NOTEST	0.184764	0.0326077	-2.5024	5.66627	0.176483	1.76631	0.0773435	1	no
ENSBTAG00000001706	ENSBTAG00000001706	E1BB11_BOVIN	11:7324935-7414636	q1	q2	OK	1.5029	0.265393	-2.50154	5.66292	0.176588	7.29601	2.9643e-13	9.52274e-13	yes
ENSBTAG00000006439	ENSBTAG00000006439	DOCK11	X:2555690-2962903	q1	q2	OK	3.02587	0.534993	-2.49976	5.65591	0.176806	16.5264	0	0	yes
ENSBTAG00000032455	ENSBTAG00000032455	H2B1_BOVIN	3:20793581-20793962	q1	q2	OK	39.131	6.91881	-2.49972	5.65574	0.176811	10.2313	0	0	yes
ENSBTAG00000008942	ENSBTAG00000008942	Q08DA6_BOVIN	3:113219679-113266318	q1	q2	OK	0.391708	0.069278	-2.49931	5.65415	0.176861	2.80969	0.00495892	0.00782308	yes
ENSBTAG00000009206	ENSBTAG00000009206	FOXS1	13:61924321-61925629	q1	q2	OK	1.45	0.256484	-2.49912	5.65337	0.176885	4.97062	6.67376e-07	1.48643e-06	yes
ENSBTAG00000017741	ENSBTAG00000017741	PTPLAD2	8:23339674-23369117	q1	q2	OK	23.0727	4.08176	-2.49892	5.65264	0.176909	22.1545	0	0	yes
ENSBTAG00000020839	ENSBTAG00000020839	MEGF6	16:50705000-50803757	q1	q2	OK	1.83476	0.324843	-2.49777	5.64814	0.17705	11.0247	0	0	yes
ENSBTAG00000043900	ENSBTAG00000043900	7SK	26:31041195-31135072	q1	q2	NOTEST	0.0906973	0.0160619	-2.49741	5.64674	0.177094	0.103787	0.917339	1	no
ENSBTAG00000017020	ENSBTAG00000017020	S100G_BOVIN	X:134046107-134155813	q1	q2	OK	85.8101	15.2105	-2.49608	5.6415	0.177258	15.9512	0	0	yes
ENSBTAG00000038945	ENSBTAG00000038945	-	2:135812787-135832714	q1	q2	NOTEST	0.164624	0.0291894	-2.49566	5.63986	0.177309	1.56554	0.117456	1	no
ENSBTAG00000020196	ENSBTAG00000020196	ENPP3	9:70588606-70673279	q1	q2	OK	0.887567	0.15741	-2.49533	5.63857	0.17735	5.71106	1.12273e-08	2.80994e-08	yes
ENSBTAG00000016944	ENSBTAG00000016944	E1BKU0_BOVIN	17:73576017-73589968	q1	q2	OK	13.2161	2.34405	-2.49522	5.63815	0.177363	15.5721	0	0	yes
ENSBTAG00000014944	ENSBTAG00000014944	TA2R_BOVIN	7:21561178-21569885	q1	q2	NOTEST	0.178985	0.0317465	-2.49517	5.63794	0.17737	1.85455	0.0636606	1	no
ENSBTAG00000033506	ENSBTAG00000033506	-	15:84088595-84089531	q1	q2	OK	0.406912	0.0722703	-2.49324	5.63042	0.177607	1.52629	0.126939	0.165734	no
ENSBTAG00000016472	ENSBTAG00000016472	A5PKM0_BOVIN	3:33824400-33834874	q1	q2	OK	17.1703	3.05052	-2.49279	5.62865	0.177662	14.7972	0	0	yes
ENSBTAG00000047478	ENSBTAG00000047478	PCDHB6	7:53933783-53936171	q1	q2	OK	0.886292	0.157486	-2.49256	5.62775	0.177691	5.2967	1.17913e-07	2.76201e-07	yes
ENSBTAG00000008774	ENSBTAG00000008774	UROC1	22:61133593-61160689	q1	q2	OK	7.27162	1.29232	-2.49231	5.6268	0.177721	15.5522	0	0	yes
ENSBTAG00000023000	ENSBTAG00000023000	-	6:28075089-28075890	q1	q2	NOTEST	0.123595	0.0219824	-2.4912	5.62245	0.177858	0.747941	0.454496	1	no
ENSBTAG00000018294	ENSBTAG00000018294	DNASE1L3	22:43639335-43658740	q1	q2	OK	1.05187	0.187264	-2.48981	5.61704	0.17803	3.6993	0.000216198	0.000391791	yes
ENSBTAG00000020335	ENSBTAG00000020335	RNF32	4:118895444-118932266	q1	q2	OK	1.05766	0.188686	-2.48681	5.6054	0.1784	3.73351	0.000188828	0.000343954	yes
ENSBTAG00000045929	ENSBTAG00000045929	LOC512440	21:20082489-20193047	q1	q2	NOTEST	0.157915	0.028183	-2.48626	5.6032	0.178468	1.72788	0.0840089	1	no
ENSBTAG00000010345	ENSBTAG00000010345	E1B735_BOVIN	X:13645602-13671526	q1	q2	NOTEST	0.159691	0.0285009	-2.4862	5.60302	0.178476	1.52101	0.128258	1	no
ENSBTAG00000016291	ENSBTAG00000016291	RHOV_BOVIN	10:36523868-36525354	q1	q2	OK	6.37968	1.13955	-2.48502	5.59842	0.178622	5.35846	8.39344e-08	1.98784e-07	yes
ENSBTAG00000032405	ENSBTAG00000032405	-	2:39571128-39572189	q1	q2	OK	5.14049	0.920809	-2.48093	5.58258	0.179129	7.45302	9.12603e-14	3.00166e-13	yes
ENSBTAG00000016070	ENSBTAG00000016070	LINGO2	8:16269364-16271185	q1	q2	NOTEST	0.192394	0.0345014	-2.47934	5.57641	0.179326	1.81004	0.0702888	1	no
ENSBTAG00000002025	ENSBTAG00000002025	AMIGO2	5:33340317-33341883	q1	q2	OK	44.4549	7.97582	-2.47864	5.57371	0.179413	25.0219	0	0	yes
ENSBTAG00000000958	ENSBTAG00000000958	ZSWIM3	13:75354605-75358234	q1	q2	OK	2.15981	0.387722	-2.47781	5.57051	0.179517	7.74315	9.76996e-15	3.37376e-14	yes
ENSBTAG00000003864	ENSBTAG00000003864	Q08E60_BOVIN	4:100282796-100324877	q1	q2	NOTEST	0.0620343	0.0111523	-2.47573	5.56247	0.179776	1.27039	0.203946	1	no
ENSBTAG00000016881	ENSBTAG00000016881	Q9TRI3_BOVIN	21:21620138-21637144	q1	q2	OK	6.02346	1.08354	-2.47483	5.55906	0.179888	16.318	0	0	yes
ENSBTAG00000005431	ENSBTAG00000005431	LMCD1_BOVIN	22:17961210-18018234	q1	q2	OK	96.3784	17.3391	-2.47468	5.55844	0.179907	31.3073	0	0	yes
ENSBTAG00000017363	ENSBTAG00000017363	SAT1_BOVIN	X:126467441-126470489	q1	q2	OK	713.454	128.387	-2.47432	5.55706	0.179951	35.3743	0	0	yes
ENSBTAG00000009381	ENSBTAG00000009381	Q45KY2_BOVIN	20:2032972-2082267	q1	q2	NOTEST	0.0666924	0.012008	-2.47352	5.554	0.180051	1.44225	0.149232	1	no
ENSBTAG00000005585	ENSBTAG00000005585	ANXA13	14:17759634-17791429	q1	q2	OK	1.07479	0.193537	-2.47337	5.55341	0.18007	4.46891	7.86189e-06	1.6167e-05	yes
ENSBTAG00000013215	ENSBTAG00000013215	MREG	2:104492354-104560643	q1	q2	OK	12.9008	2.32882	-2.46979	5.53963	0.180517	14.0177	0	0	yes
ENSBTAG00000001310	ENSBTAG00000001310	OPSD_BOVIN	22:56867886-56872817	q1	q2	NOTEST	0.172544	0.0311536	-2.46949	5.53849	0.180555	1.44074	0.149659	1	no
ENSBTAG00000046689	ENSBTAG00000046689	-	17:5105466-5105545	q1	q2	OK	190.682	34.4346	-2.46924	5.53751	0.180586	1.57123	0.116128	0.152525	no
ENSBTAG00000047227	ENSBTAG00000047227	-	28:26916376-26918507	q1	q2	OK	3.0173	0.545188	-2.46843	5.53442	0.180688	1.76642	0.077325	0.104513	no
ENSBTAG00000045966	ENSBTAG00000045966	GPRIN3	6:36989138-36991481	q1	q2	OK	1.62805	0.294197	-2.46829	5.53388	0.180705	7.26232	3.80584e-13	1.21566e-12	yes
ENSBTAG00000004095	ENSBTAG00000004095	FAM166A	11:105856511-105862549	q1	q2	OK	0.750329	0.135636	-2.46778	5.53193	0.180769	2.83697	0.00455438	0.00721217	yes
ENSBTAG00000019617	ENSBTAG00000019617	PTPN22	3:29666148-29722631	q1	q2	NOTEST	0.107833	0.0195203	-2.46576	5.52415	0.181022	1.64178	0.100636	1	no
ENSBTAG00000003192	ENSBTAG00000003192	TBC1D16	19:53181378-53245548	q1	q2	OK	3.03399	0.549313	-2.46552	5.52324	0.181052	7.32883	2.32259e-13	7.49382e-13	yes
ENSBTAG00000016272	ENSBTAG00000016272	TEX11	X:85042820-85229518	q1	q2	NOTEST	0.0631696	0.0114384	-2.46534	5.52259	0.181075	1.56883	0.116688	1	no
ENSBTAG00000010858	ENSBTAG00000010858	ABCC11	18:16654446-16732300	q1	q2	NOTEST	0.0745606	0.0135294	-2.46232	5.51101	0.181455	1.12046	0.262516	1	no
ENSBTAG00000001075	ENSBTAG00000001075	CALB2	18:39808726-39838373	q1	q2	NOTEST	0.117074	0.0212576	-2.46137	5.5074	0.181574	1.43452	0.151424	1	no
ENSBTAG00000026278	ENSBTAG00000026278	CLD4_BOVIN	25:33988116-33989662	q1	q2	OK	262.54	47.6816	-2.46103	5.50611	0.181617	35.169	0	0	yes
ENSBTAG00000005396	ENSBTAG00000005396	XKR6	8:7983900-8000085	q1	q2	NOTEST	0.139572	0.0253778	-2.45937	5.49977	0.181826	1.34011	0.180209	1	no
ENSBTAG00000034323	ENSBTAG00000034323	GTR5_BOVIN	16:45252620-45255676	q1	q2	NOTEST	0.229256	0.0417085	-2.45855	5.49663	0.181929	1.85952	0.0629541	1	no
ENSBTAG00000024272	ENSBTAG00000024272	-	3:54790801-54816647	q1	q2	NOTEST	0.249013	0.0453278	-2.45775	5.4936	0.18203	2.32775	0.0199252	1	no
ENSBTAG00000015635	ENSBTAG00000015635	A5PJH6_BOVIN	16:52484467-52487309	q1	q2	OK	3.01572	0.549224	-2.45704	5.49087	0.18212	6.26599	3.70453e-10	1.01645e-09	yes
ENSBTAG00000002505	ENSBTAG00000002505	GPR3	2:126478727-126479720	q1	q2	OK	1.26447	0.230315	-2.45686	5.49018	0.182143	3.76951	0.000163566	0.000299818	yes
ENSBTAG00000003806	ENSBTAG00000003806	A5PJT7_BOVIN	3:20228527-20233933	q1	q2	OK	29.2844	5.33644	-2.45618	5.48763	0.182228	22.5062	0	0	yes
ENSBTAG00000015341	ENSBTAG00000015341	DEPTOR	14:83664778-83783770	q1	q2	OK	2.61623	0.477288	-2.45456	5.48145	0.182433	6.88756	5.67568e-12	1.70701e-11	yes
ENSBTAG00000019012	ENSBTAG00000019012	KCTD16	7:57253500-57563233	q1	q2	NOTEST	0.261067	0.0476409	-2.45415	5.47989	0.182485	1.97594	0.0481618	1	no
ENSBTAG00000045919	ENSBTAG00000045919	-	5:62391853-62392231	q1	q2	NOTEST	0.173687	0.0317454	-2.45187	5.47125	0.182774	0.317422	0.750924	1	no
ENSBTAG00000006561	ENSBTAG00000006561	RGF1B_BOVIN	6:97988423-98026691	q1	q2	OK	0.315623	0.0578403	-2.44806	5.4568	0.183257	3.50889	0.000449976	0.000792573	yes
ENSBTAG00000017855	ENSBTAG00000017855	ITM2C_BOVIN	2:119476495-119490380	q1	q2	OK	188.562	34.6003	-2.44619	5.44972	0.183495	35.0507	0	0	yes
ENSBTAG00000046900	ENSBTAG00000046900	-	17:73437808-73452741	q1	q2	OK	26.3553	4.84524	-2.44345	5.43942	0.183843	22.4437	0	0	yes
ENSBTAG00000009639	ENSBTAG00000009639	SMPD3	18:35847644-35872312	q1	q2	OK	0.724102	0.133261	-2.44193	5.43371	0.184037	5.48965	4.02721e-08	9.73616e-08	yes
ENSBTAG00000010303	ENSBTAG00000010303	ICAM1	7:16040937-16050247	q1	q2	OK	1.59519	0.294661	-2.4366	5.41364	0.184718	5.75933	8.44496e-09	2.12963e-08	yes
ENSBTAG00000008556	ENSBTAG00000008556	POU2F2	18:51475030-51497957	q1	q2	OK	3.24661	0.599868	-2.43622	5.41221	0.184767	7.58531	3.30846e-14	1.11042e-13	yes
ENSBTAG00000000598	ENSBTAG00000000598	CYTC_BOVIN	13:42562166-42566091	q1	q2	OK	615.302	113.801	-2.43478	5.40682	0.184952	34.7838	0	0	yes
ENSBTAG00000013943	ENSBTAG00000013943	ZNF703	27:32683064-32685824	q1	q2	OK	6.35983	1.17629	-2.43475	5.40669	0.184955	12.0361	0	0	yes
ENSBTAG00000024288	ENSBTAG00000024288	F1MP21_BOVIN	3:39885181-39898236	q1	q2	NOTEST	0.199802	0.0369845	-2.43358	5.40232	0.185106	1.65892	0.0971319	1	no
ENSBTAG00000045923	ENSBTAG00000045923	Q70IB5_BOVIN	23:7036909-7046366	q1	q2	OK	0.92543	0.17133	-2.43335	5.40145	0.185135	2.19111	0.0284439	0.0409274	yes
ENSBTAG00000006528	ENSBTAG00000006528	BBS9	4:63649807-64105542	q1	q2	OK	5.76665	1.06908	-2.43136	5.39403	0.185391	15.2707	0	0	yes
ENSBTAG00000004277	ENSBTAG00000004277	EVC2	6:105291555-105452049	q1	q2	OK	2.00818	0.372972	-2.42875	5.38426	0.185726	10.5538	0	0	yes
ENSBTAG00000004136	ENSBTAG00000004136	A4IFL8_BOVIN	4:70211379-70246094	q1	q2	OK	56.2739	10.4853	-2.42409	5.36693	0.186327	44.3145	0	0	yes
ENSBTAG00000003833	ENSBTAG00000003833	Q17QG0_BOVIN	1:133401648-133439465	q1	q2	OK	0.319002	0.0595412	-2.42161	5.35767	0.186648	2.22521	0.0260673	0.0377213	yes
ENSBTAG00000011533	ENSBTAG00000011533	A6QPP1_BOVIN	18:14321862-14326425	q1	q2	OK	1.69099	0.315713	-2.42118	5.3561	0.186703	6.01541	1.79432e-09	4.7172e-09	yes
ENSBTAG00000019337	ENSBTAG00000019337	ACVR1C	2:38549886-38599514	q1	q2	OK	1.35982	0.254118	-2.41985	5.35114	0.186876	5.02167	5.12246e-07	1.14909e-06	yes
ENSBTAG00000004905	ENSBTAG00000004905	K1C19_BOVIN	19:42366659-42370493	q1	q2	OK	0.796382	0.148887	-2.41924	5.3489	0.186955	3.60778	0.000308831	0.000551367	yes
ENSBTAG00000014069	ENSBTAG00000014069	PDK4	4:12754201-12767677	q1	q2	OK	3.52795	0.660525	-2.41714	5.34113	0.187227	13.4407	0	0	yes
ENSBTAG00000002849	ENSBTAG00000002849	IRF6_BOVIN	16:75401220-75417466	q1	q2	OK	3.28279	0.614641	-2.4171	5.34099	0.187232	9.34472	0	0	yes
ENSBTAG00000038125	ENSBTAG00000038125	-	18:58791961-58792300	q1	q2	OK	0.325775	0.0610923	-2.41481	5.33251	0.18753	0.472571	0.636519	0.695146	no
ENSBTAG00000018445	ENSBTAG00000018445	GRIN3A	8:92945057-93145524	q1	q2	NOTEST	0.0760272	0.0142643	-2.4141	5.32989	0.187622	1.75137	0.0798824	1	no
ENSBTAG00000001429	ENSBTAG00000001429	NEURL1B	20:4337738-4356155	q1	q2	OK	2.80983	0.527273	-2.41386	5.32899	0.187653	7.50479	6.15064e-14	2.03827e-13	yes
ENSBTAG00000005667	ENSBTAG00000005667	FAM75D1	8:58234603-58240521	q1	q2	OK	11.2572	2.11296	-2.41352	5.32769	0.187697	22.6607	0	0	yes
ENSBTAG00000007596	ENSBTAG00000007596	A4IFA1_BOVIN	14:72386750-72399660	q1	q2	OK	38.7444	7.28679	-2.41063	5.31707	0.188074	27.3805	0	0	yes
ENSBTAG00000047325	ENSBTAG00000047325	GBGT2_BOVIN	19:37995627-37998546	q1	q2	OK	0.515805	0.0970551	-2.40995	5.31456	0.188162	1.43616	0.150958	0.194133	no
ENSBTAG00000016177	ENSBTAG00000016177	FGL1_BOVIN	27:18454361-18472436	q1	q2	OK	2.02799	0.381757	-2.40933	5.31225	0.188243	4.6585	3.18516e-06	6.74865e-06	yes
ENSBTAG00000019179	ENSBTAG00000019179	TSKS	18:56571570-56587477	q1	q2	OK	0.552502	0.104206	-2.40654	5.30202	0.188608	3.49283	0.000477939	0.000839282	yes
ENSBTAG00000021685	ENSBTAG00000021685	EF1A2_BOVIN	13:54623916-54631595	q1	q2	OK	10.1073	1.90704	-2.40599	5.29999	0.18868	14.9122	0	0	yes
ENSBTAG00000016124	ENSBTAG00000016124	PACN1_BOVIN	23:8469768-8534469	q1	q2	OK	1.95226	0.368433	-2.40567	5.29882	0.188721	10.4889	0	0	yes
ENSBTAG00000016163	ENSBTAG00000016163	OSM	17:71434467-71437372	q1	q2	OK	0.44345	0.0837144	-2.40522	5.29718	0.18878	1.71084	0.0871102	0.116952	no
ENSBTAG00000007554	ENSBTAG00000007554	IFI6_BOVIN	2:126246560-126250182	q1	q2	OK	130.553	24.6612	-2.40433	5.29386	0.188897	24.3725	0	0	yes
ENSBTAG00000044430	ENSBTAG00000044430	SNORA70	3:34545728-34580297	q1	q2	OK	5.22748	0.988102	-2.40338	5.29043	0.189021	0.369587	0.71169	0.764361	no
ENSBTAG00000017765	ENSBTAG00000017765	GSTM1_BOVIN	3:33805753-33816442	q1	q2	OK	76.1956	14.4031	-2.40333	5.29022	0.189028	26.4137	0	0	yes
ENSBTAG00000001745	ENSBTAG00000001745	LUM_BOVIN	5:21037442-21044658	q1	q2	OK	0.604949	0.114405	-2.40267	5.28778	0.189114	3.7183	0.000200564	0.000364312	yes
ENSBTAG00000017069	ENSBTAG00000017069	MGC139026	17:41769526-41784176	q1	q2	OK	0.287173	0.054348	-2.40162	5.28397	0.189252	2.68906	0.00716525	0.0111226	yes
ENSBTAG00000038737	ENSBTAG00000038737	P2RY6	15:53559421-53564982	q1	q2	OK	0.607005	0.115122	-2.39854	5.27271	0.189656	3.36106	0.000776434	0.00133365	yes
ENSBTAG00000016841	ENSBTAG00000016841	ATP10B	7:74334044-74472502	q1	q2	NOTEST	0.103686	0.0196668	-2.39838	5.27213	0.189677	2.33732	0.0194224	1	no
ENSBTAG00000021576	ENSBTAG00000021576	A4IFK3_BOVIN	16:49624531-49651879	q1	q2	OK	9.31863	1.76838	-2.39769	5.26959	0.189768	16.801	0	0	yes
ENSBTAG00000006949	ENSBTAG00000006949	SPAG4	13:65499317-65504023	q1	q2	OK	1.68715	0.320521	-2.3961	5.26377	0.189977	5.54526	2.9351e-08	7.1651e-08	yes
ENSBTAG00000016345	ENSBTAG00000016345	IL2RB	5:75927871-75939915	q1	q2	OK	1.79496	0.341093	-2.39572	5.26238	0.190027	6.22022	4.96445e-10	1.3494e-09	yes
ENSBTAG00000008168	ENSBTAG00000008168	STARD6	24:54186471-54203204	q1	q2	OK	0.892651	0.169751	-2.39468	5.25859	0.190165	2.47986	0.0131434	0.019723	yes
ENSBTAG00000009017	ENSBTAG00000009017	STF1_BOVIN	11:95514364-95538847	q1	q2	OK	0.28758	0.0547583	-2.39281	5.25181	0.190411	2.016	0.0438002	0.0614312	no
ENSBTAG00000000181	ENSBTAG00000000181	SUSD3	8:85876325-85895632	q1	q2	NOTEST	0.202162	0.038495	-2.39277	5.25164	0.190416	1.38336	0.166556	1	no
ENSBTAG00000018773	ENSBTAG00000018773	RND1_BOVIN	5:31090624-31097555	q1	q2	OK	13.1115	2.49753	-2.39226	5.24979	0.190484	15.883	0	0	yes
ENSBTAG00000023192	ENSBTAG00000023192	-	5:101751208-101757820	q1	q2	NOTEST	0.0793985	0.0151318	-2.39153	5.24713	0.19058	0.744258	0.456721	1	no
ENSBTAG00000021287	ENSBTAG00000021287	Q2EF45_BOVIN	5:53987908-54214799	q1	q2	NOTEST	0.18742	0.0357266	-2.3912	5.24595	0.190624	2.4353	0.0148793	1	no
ENSBTAG00000012409	ENSBTAG00000012409	Q2KJC7_BOVIN	12:24241936-24276486	q1	q2	OK	1.02685	0.195757	-2.39109	5.24553	0.190638	6.50685	7.67448e-11	2.18611e-10	yes
ENSBTAG00000006790	ENSBTAG00000006790	SPTBN5	10:37355714-37405210	q1	q2	OK	0.655994	0.12513	-2.39025	5.2425	0.190749	10.4549	0	0	yes
ENSBTAG00000019834	ENSBTAG00000019834	ARL15_BOVIN	20:24955389-25026808	q1	q2	OK	31.3171	5.97747	-2.38935	5.23919	0.190868	9.85132	0	0	yes
ENSBTAG00000011990	ENSBTAG00000011990	F1MCH9_BOVIN	19:27331074-27339653	q1	q2	NOTEST	0.197384	0.0377319	-2.38715	5.23122	0.19116	2.68877	0.00717167	1	no
ENSBTAG00000017060	ENSBTAG00000017060	ITB2_BOVIN	1:145104445-145133581	q1	q2	OK	2.96162	0.56662	-2.38594	5.22682	0.19132	10.4949	0	0	yes
ENSBTAG00000012212	ENSBTAG00000012212	E1BHJ4_BOVIN	11:12371179-12387041	q1	q2	OK	6.16939	1.1811	-2.385	5.22343	0.191445	10.9164	0	0	yes
ENSBTAG00000015118	ENSBTAG00000015118	A5PJT4_BOVIN	23:10166998-10223695	q1	q2	NOTEST	0.181365	0.0347233	-2.38492	5.22315	0.191455	2.95582	0.00311839	1	no
ENSBTAG00000033137	ENSBTAG00000033137	PSD3	27:38483891-38797972	q1	q2	OK	5.80333	1.11114	-2.38484	5.22286	0.191466	14.9255	0	0	yes
ENSBTAG00000004785	ENSBTAG00000004785	CABP4_BOVIN	29:45988624-45992117	q1	q2	OK	0.384138	0.0735537	-2.38476	5.22255	0.191477	2.01497	0.0439081	0.0615614	no
ENSBTAG00000000053	ENSBTAG00000000053	FILIP1	9:15140840-15249645	q1	q2	NOTEST	0.0496379	0.00951028	-2.38388	5.21939	0.191593	1.46152	0.143874	1	no
ENSBTAG00000013052	ENSBTAG00000013052	F1MC60_BOVIN	25:20058141-20076660	q1	q2	OK	0.649936	0.124717	-2.38164	5.21129	0.191891	2.87838	0.00399721	0.00637016	yes
ENSBTAG00000005828	ENSBTAG00000005828	MERTK	11:332457-427685	q1	q2	OK	8.93291	1.71443	-2.3814	5.21043	0.191923	18.9291	0	0	yes
ENSBTAG00000018198	ENSBTAG00000018198	Q56GY1_BOVIN	22:49229609-49233939	q1	q2	OK	0.437888	0.0841719	-2.37915	5.20231	0.192223	4.30282	1.68641e-05	3.38073e-05	yes
ENSBTAG00000012567	ENSBTAG00000012567	TERT	20:71263286-71279911	q1	q2	OK	1.06848	0.205824	-2.37608	5.19123	0.192632	7.07349	1.51079e-12	4.69216e-12	yes
ENSBTAG00000020537	ENSBTAG00000020537	ACCN4	2:108168448-108191017	q1	q2	OK	1.49071	0.287259	-2.37557	5.18943	0.1927	5.50409	3.71076e-08	8.99518e-08	yes
ENSBTAG00000013213	ENSBTAG00000013213	OSR2_BOVIN	14:67533221-67540870	q1	q2	OK	5.10813	0.985337	-2.37411	5.18415	0.192895	10.6217	0	0	yes
ENSBTAG00000001936	ENSBTAG00000001936	PCK1	13:59144593-59150719	q1	q2	OK	5.32794	1.0307	-2.36996	5.16924	0.193451	13.3563	0	0	yes
ENSBTAG00000010278	ENSBTAG00000010278	CA201_BOVIN	2:129096651-129156302	q1	q2	OK	1.78519	0.346447	-2.36537	5.15285	0.194067	7.4983	6.4615e-14	2.13867e-13	yes
ENSBTAG00000001818	ENSBTAG00000001818	F2Z4G1_BOVIN	7:4022380-4026425	q1	q2	OK	4.02175	0.782464	-2.36172	5.13985	0.194559	8.10547	4.44089e-16	1.61874e-15	yes
ENSBTAG00000000648	ENSBTAG00000000648	ADAMTS5	1:8811791-8861602	q1	q2	OK	0.644481	0.125432	-2.36123	5.13809	0.194625	4.90571	9.3092e-07	2.0529e-06	yes
ENSBTAG00000015309	ENSBTAG00000015309	C15H11orf70	15:6917401-6947618	q1	q2	OK	8.64723	1.68399	-2.36036	5.13497	0.194743	11.9033	0	0	yes
ENSBTAG00000007077	ENSBTAG00000007077	ABHD1_BOVIN	11:72493260-72504279	q1	q2	OK	2.93679	0.572377	-2.3592	5.13087	0.194899	6.90282	5.09792e-12	1.53922e-11	yes
ENSBTAG00000014537	ENSBTAG00000014537	PLEKHN1	16:52748703-52755937	q1	q2	OK	4.18997	0.816782	-2.35892	5.12985	0.194937	10.283	0	0	yes
ENSBTAG00000020573	ENSBTAG00000020573	SCUBE2	15:44090740-44158843	q1	q2	OK	0.289529	0.0564654	-2.35827	5.12755	0.195025	3.53715	0.000404465	0.000715277	yes
ENSBTAG00000030543	ENSBTAG00000030543	SLC6A16	18:56224968-56250611	q1	q2	NOTEST	0.142872	0.0278686	-2.35801	5.12663	0.19506	1.70933	0.0873901	1	no
ENSBTAG00000002749	ENSBTAG00000002749	F1MCX2_BOVIN	19:46456087-46483532	q1	q2	NOTEST	0.192565	0.0375637	-2.35794	5.12636	0.195069	1.44321	0.148963	1	no
ENSBTAG00000016170	ENSBTAG00000016170	A2VDS4_BOVIN	15:35650714-35653362	q1	q2	OK	1.66181	0.324541	-2.35629	5.12049	0.195293	7.67428	1.66533e-14	5.67959e-14	yes
ENSBTAG00000039937	ENSBTAG00000039937	TNFRSF8	16:42440210-42493773	q1	q2	OK	0.472777	0.0924073	-2.35508	5.11623	0.195457	3.21659	0.00129725	0.00217924	yes
ENSBTAG00000042803	ENSBTAG00000042803	SNORA11	7:1660818-1660948	q1	q2	OK	24.1999	4.73043	-2.35496	5.11579	0.195473	1.10434	0.269448	0.328146	no
ENSBTAG00000002631	ENSBTAG00000002631	SCNN1A	5:104364799-104396610	q1	q2	OK	2.81826	0.551045	-2.35456	5.11439	0.195527	8.60165	0	0	yes
ENSBTAG00000015138	ENSBTAG00000015138	MGA	10:37193025-37281324	q1	q2	NOTEST	0.0353259	0.00690779	-2.35443	5.11392	0.195545	1.77619	0.0757013	1	no
ENSBTAG00000039433	ENSBTAG00000039433	PCDHB17	7:53946907-53949301	q1	q2	OK	1.31174	0.256531	-2.35428	5.11338	0.195565	6.46802	9.92972e-11	2.81619e-10	yes
ENSBTAG00000013706	ENSBTAG00000013706	MEGF9	8:111919129-111995270	q1	q2	OK	15.4697	3.02675	-2.35361	5.11099	0.195656	17.4515	0	0	yes
ENSBTAG00000020713	ENSBTAG00000020713	E1BIQ6_BOVIN	9:61064368-61222077	q1	q2	OK	0.922011	0.180734	-2.35091	5.10148	0.196022	2.78176	0.00540653	0.00849218	yes
ENSBTAG00000024075	ENSBTAG00000024075	SLC9A4	11:7229705-7284500	q1	q2	OK	0.789231	0.154711	-2.35088	5.10132	0.196026	5.29129	1.21458e-07	2.84176e-07	yes
ENSBTAG00000024643	ENSBTAG00000024643	VEPH1	1:110986516-111211551	q1	q2	OK	1.05941	0.207685	-2.35079	5.10104	0.196039	5.82033	5.87324e-09	1.49594e-08	yes
ENSBTAG00000012938	ENSBTAG00000012938	JARID2	23:41165797-41302731	q1	q2	OK	6.03389	1.18375	-2.34973	5.09727	0.196183	19.4932	0	0	yes
ENSBTAG00000006720	ENSBTAG00000006720	F1MHC7_BOVIN	3:21983347-21999397	q1	q2	NOTEST	0.159638	0.0313218	-2.34957	5.09671	0.196204	1.88641	0.0592391	1	no
ENSBTAG00000002982	ENSBTAG00000002982	PITPNM3	19:25942766-26017902	q1	q2	OK	0.791719	0.155507	-2.34801	5.09121	0.196417	5.62922	1.81025e-08	4.47053e-08	yes
ENSBTAG00000044197	ENSBTAG00000044197	EDARADD	28:9128812-9195608	q1	q2	OK	0.300668	0.0590738	-2.34758	5.0897	0.196475	1.37072	0.170463	0.216563	no
ENSBTAG00000012026	ENSBTAG00000012026	-	5:100623082-100641927	q1	q2	OK	0.752942	0.148065	-2.3463	5.08521	0.19665	2.25473	0.0241502	0.035122	yes
ENSBTAG00000027348	ENSBTAG00000027348	OOSP1_BOVIN	15:84427063-84434956	q1	q2	OK	0.348706	0.0686296	-2.34511	5.08099	0.196812	1.47597	0.139951	0.180879	no
ENSBTAG00000018229	ENSBTAG00000018229	F1MCB7_BOVIN	7:13596366-13658112	q1	q2	OK	4.4524	0.876534	-2.3447	5.07955	0.196868	9.51964	0	0	yes
ENSBTAG00000020535	ENSBTAG00000020535	PYCARD	25:27541408-27542740	q1	q2	NOTEST	0.276422	0.0544478	-2.34393	5.07683	0.196973	1.14358	0.2528	1	no
ENSBTAG00000006784	ENSBTAG00000006784	PLA2G4B	10:37346274-37355599	q1	q2	OK	3.98163	0.785362	-2.34193	5.0698	0.197246	11.819	0	0	yes
ENSBTAG00000022829	ENSBTAG00000022829	-	24:58561225-58628987	q1	q2	NOTEST	0.0576101	0.0113694	-2.34117	5.06712	0.19735	1.24055	0.214771	1	no
ENSBTAG00000006155	ENSBTAG00000006155	CCRL2_BOVIN	22:53567796-53569696	q1	q2	NOTEST	0.119878	0.0236604	-2.34102	5.06661	0.197371	1.40453	0.160162	1	no
ENSBTAG00000035247	ENSBTAG00000035247	MCEE_BOVIN	21:27897957-27905993	q1	q2	OK	23.7238	4.68619	-2.33985	5.06249	0.197531	14.1669	0	0	yes
ENSBTAG00000045580	ENSBTAG00000045580	-	17:8880523-8891738	q1	q2	NOTEST	0.0664903	0.0131387	-2.33932	5.06065	0.197603	0.714739	0.47477	1	no
ENSBTAG00000038112	ENSBTAG00000038112	A6QQ36_BOVIN	9:85917824-86020619	q1	q2	OK	28.3694	5.61022	-2.33821	5.05674	0.197756	22.8396	0	0	yes
ENSBTAG00000006716	ENSBTAG00000006716	PGH1_BOVIN	11:93219286-93245045	q1	q2	OK	2.12224	0.420239	-2.33631	5.05008	0.198016	8.5231	0	0	yes
ENSBTAG00000002674	ENSBTAG00000002674	GBG1_BOVIN	4:11060375-11067420	q1	q2	OK	1.48883	0.294981	-2.33548	5.04721	0.19813	2.04883	0.0404788	0.0570089	no
ENSBTAG00000018106	ENSBTAG00000018106	MIEAP_BOVIN	6:69564008-69608371	q1	q2	OK	0.653358	0.129483	-2.33511	5.0459	0.198181	4.04048	5.33429e-05	0.000102393	yes
ENSBTAG00000015893	ENSBTAG00000015893	EPN3	19:36811805-36821284	q1	q2	OK	0.776234	0.154039	-2.33319	5.0392	0.198445	4.98686	6.13697e-07	1.36987e-06	yes
ENSBTAG00000039363	ENSBTAG00000039363	-	24:49176825-49177310	q1	q2	OK	0.517162	0.102676	-2.33252	5.03683	0.198537	1.46011	0.144261	0.18608	no
ENSBTAG00000007421	ENSBTAG00000007421	CDH5	18:34260147-34274741	q1	q2	NOTEST	0.0880096	0.0174742	-2.33243	5.03655	0.198549	1.46005	0.144276	1	no
ENSBTAG00000000395	ENSBTAG00000000395	ADAMTS20	5:37102589-37332440	q1	q2	OK	0.426301	0.0846454	-2.33237	5.03632	0.198558	5.83311	5.44051e-09	1.38921e-08	yes
ENSBTAG00000011584	ENSBTAG00000011584	CHST2	1:126870799-126874541	q1	q2	OK	0.861595	0.17116	-2.33167	5.03386	0.198654	6.58493	4.551e-11	1.31014e-10	yes
ENSBTAG00000010801	ENSBTAG00000010801	CMBL	20:63065547-63090743	q1	q2	OK	165.146	32.8072	-2.33166	5.03383	0.198655	32.3899	0	0	yes
ENSBTAG00000014603	ENSBTAG00000014603	VAMP1_BOVIN	5:104285968-104300410	q1	q2	OK	9.56682	1.90117	-2.33115	5.03207	0.198726	17.0234	0	0	yes
ENSBTAG00000013688	ENSBTAG00000013688	PLGF_BOVIN	10:86595705-86608816	q1	q2	OK	0.302755	0.0601786	-2.33083	5.03094	0.19877	2.27836	0.0227053	0.0331036	yes
ENSBTAG00000018831	ENSBTAG00000018831	DAO	17:66356384-66369068	q1	q2	NOTEST	0.228221	0.045428	-2.32877	5.0238	0.199054	1.43349	0.151719	1	no
ENSBTAG00000013345	ENSBTAG00000013345	-	18:61832252-61835027	q1	q2	NOTEST	0.0234233	0.00467056	-2.32628	5.01509	0.199398	0.290276	0.771605	1	no
ENSBTAG00000003253	ENSBTAG00000003253	ANFC_BOVIN	2:120392633-120397261	q1	q2	OK	6.67526	1.3333	-2.32382	5.00657	0.199738	6.22071	4.94923e-10	1.34571e-09	yes
ENSBTAG00000008368	ENSBTAG00000008368	-	19:40363702-40372714	q1	q2	NOTEST	0.201153	0.040208	-2.32274	5.00281	0.199887	1.7458	0.0808456	1	no
ENSBTAG00000012780	ENSBTAG00000012780	PERL_BOVIN	19:9441747-9471498	q1	q2	NOTEST	0.0782204	0.0156522	-2.32118	4.99741	0.200104	1.08846	0.276393	1	no
ENSBTAG00000018130	ENSBTAG00000018130	Q28869_BOVIN	2:97843886-97988140	q1	q2	OK	17.9364	3.59559	-2.31859	4.98844	0.200463	27.7745	0	0	yes
ENSBTAG00000012016	ENSBTAG00000012016	LMTK3	18:55609441-55624795	q1	q2	OK	0.736176	0.147623	-2.31814	4.98687	0.200526	6.58004	4.70324e-11	1.353e-10	yes
ENSBTAG00000026896	ENSBTAG00000026896	FOXF2	23:51549720-51553563	q1	q2	NOTEST	0.174068	0.0349326	-2.317	4.98297	0.200684	1.11443	0.265093	1	no
ENSBTAG00000013476	ENSBTAG00000013476	CPA5	4:94861072-94932849	q1	q2	NOTEST	0.080307	0.0161231	-2.3164	4.98087	0.200768	1.32599	0.184842	1	no
ENSBTAG00000008082	ENSBTAG00000008082	CEP350	16:62641889-62772808	q1	q2	OK	49.4364	9.94498	-2.31353	4.97099	0.201168	33.5459	0	0	yes
ENSBTAG00000021321	ENSBTAG00000021321	SDCBP2	13:60343083-60351717	q1	q2	OK	1.66542	0.33522	-2.3127	4.96814	0.201283	5.06233	4.14156e-07	9.35372e-07	yes
ENSBTAG00000008539	ENSBTAG00000008539	ENHO_BOVIN	8:77234223-77236116	q1	q2	OK	18.9557	3.81933	-2.31125	4.9631	0.201486	14.1515	0	0	yes
ENSBTAG00000001382	ENSBTAG00000001382	SLC26A9	16:3479417-3498921	q1	q2	OK	0.543281	0.109651	-2.30877	4.95464	0.201832	4.04019	5.34077e-05	0.000102493	yes
ENSBTAG00000000770	ENSBTAG00000000770	A5PKH8_BOVIN	15:54484805-54537330	q1	q2	OK	7.71122	1.55717	-2.30803	4.95207	0.201936	15.955	0	0	yes
ENSBTAG00000013203	ENSBTAG00000013203	GP5	1:73740502-73776574	q1	q2	NOTEST	0.191491	0.0386767	-2.30774	4.95107	0.201977	1.58479	0.113013	1	no
ENSBTAG00000016315	ENSBTAG00000016315	COTL1_BOVIN	18:10781075-10825733	q1	q2	OK	156.209	31.5755	-2.3066	4.94716	0.202136	32.5081	0	0	yes
ENSBTAG00000009297	ENSBTAG00000009297	A6QR29_BOVIN	5:121170972-121178483	q1	q2	OK	2.16456	0.437707	-2.30604	4.94523	0.202215	8.976	0	0	yes
ENSBTAG00000031863	ENSBTAG00000031863	HIG2	4:93460873-93462935	q1	q2	OK	11.3545	2.30143	-2.30266	4.93367	0.202689	12.5844	0	0	yes
ENSBTAG00000005850	ENSBTAG00000005850	DLK2_BOVIN	23:16961897-16986060	q1	q2	OK	0.336427	0.0681923	-2.30261	4.9335	0.202696	2.10355	0.0354181	0.050326	no
ENSBTAG00000021745	ENSBTAG00000021745	RAPSN	15:78463173-78475425	q1	q2	OK	0.453447	0.0919603	-2.30185	4.9309	0.202803	2.62989	0.00854114	0.0131107	yes
ENSBTAG00000047179	ENSBTAG00000047179	-	5:9976744-9977709	q1	q2	OK	0.705699	0.143222	-2.3008	4.92731	0.202951	2.72254	0.00647822	0.0100907	yes
ENSBTAG00000001257	ENSBTAG00000001257	AGTPBP1	8:80235082-80392851	q1	q2	OK	7.63988	1.551	-2.30035	4.92578	0.203014	18.9999	0	0	yes
ENSBTAG00000019808	ENSBTAG00000019808	FAM190A	6:35100700-35938394	q1	q2	OK	0.293471	0.0596275	-2.29917	4.92174	0.20318	3.59583	0.000323365	0.000576367	yes
ENSBTAG00000006295	ENSBTAG00000006295	TSHB_BOVIN	3:28364795-28587650	q1	q2	NOTEST	0.126798	0.0257792	-2.29826	4.91862	0.203308	0.450433	0.652398	1	no
ENSBTAG00000003172	ENSBTAG00000003172	MEIS2	10:32643647-32866661	q1	q2	OK	6.39866	1.30265	-2.29632	4.91203	0.203582	14.3438	0	0	yes
ENSBTAG00000038604	ENSBTAG00000038604	H2B1_BOVIN	3:20803165-20803923	q1	q2	OK	23.4844	4.78201	-2.29602	4.91099	0.203624	13.3587	0	0	yes
ENSBTAG00000004375	ENSBTAG00000004375	ESRP2	18:35735065-35741010	q1	q2	OK	1.56607	0.318919	-2.29589	4.91056	0.203642	7.18363	6.7879e-13	2.14294e-12	yes
ENSBTAG00000015773	ENSBTAG00000015773	LRGUK	4:98639419-98791780	q1	q2	NOTEST	0.0938002	0.0191464	-2.29251	4.8991	0.20412	1.58723	0.112462	1	no
ENSBTAG00000040193	ENSBTAG00000040193	COLQ	1:154218713-154285721	q1	q2	OK	0.782933	0.15984	-2.29226	4.89823	0.204155	4.38385	1.16603e-05	2.36727e-05	yes
ENSBTAG00000013638	ENSBTAG00000013638	IQCH	10:14075186-14304476	q1	q2	OK	5.11097	1.04358	-2.29205	4.89754	0.204185	14.2737	0	0	yes
ENSBTAG00000020975	ENSBTAG00000020975	SYNGAP1	23:7537951-7566784	q1	q2	OK	2.77589	0.567508	-2.29024	4.89137	0.204442	12.923	0	0	yes
ENSBTAG00000015717	ENSBTAG00000015717	HEY1_BOVIN	14:45126101-45128997	q1	q2	OK	21.8061	4.46766	-2.28714	4.88088	0.204881	17.1868	0	0	yes
ENSBTAG00000003749	ENSBTAG00000003749	KCNMB4	5:43266424-43347032	q1	q2	OK	1.46811	0.300985	-2.28619	4.87768	0.205016	7.84985	4.21885e-15	1.47882e-14	yes
ENSBTAG00000039154	ENSBTAG00000039154	-	28:42584643-42585670	q1	q2	OK	1.37531	0.282038	-2.28579	4.87633	0.205073	3.9214	8.80355e-05	0.000165587	yes
ENSBTAG00000045800	ENSBTAG00000045800	-	7:92280133-92281108	q1	q2	NOTEST	0.0796465	0.0163347	-2.28567	4.87591	0.20509	0.620076	0.535208	1	no
ENSBTAG00000032353	ENSBTAG00000032353	CCD63_BOVIN	17:56914592-56952592	q1	q2	NOTEST	0.0816502	0.0167695	-2.28362	4.86897	0.205382	1.06603	0.286411	1	no
ENSBTAG00000011324	ENSBTAG00000011324	EMILIN1	11:72539295-72547260	q1	q2	NOTEST	0.244582	0.050258	-2.2829	4.86653	0.205484	3.3556	0.000791926	1	no
ENSBTAG00000025964	ENSBTAG00000025964	MAST4	20:12379228-12461102	q1	q2	OK	2.36888	0.487483	-2.28078	4.85941	0.205786	12.4547	0	0	yes
ENSBTAG00000012503	ENSBTAG00000012503	MGAT3	5:111423286-111424897	q1	q2	OK	2.92617	0.602172	-2.28077	4.85936	0.205788	7.64327	2.10942e-14	7.16411e-14	yes
ENSBTAG00000040504	ENSBTAG00000040504	-	10:25034410-25034965	q1	q2	OK	6.61352	1.36118	-2.28056	4.85867	0.205818	4.6992	2.61177e-06	5.57077e-06	yes
ENSBTAG00000021082	ENSBTAG00000021082	TM125_BOVIN	3:103337707-103339562	q1	q2	OK	1.55417	0.319934	-2.2803	4.85778	0.205855	5.60559	2.07548e-08	5.10414e-08	yes
ENSBTAG00000034246	ENSBTAG00000034246	ACRBP	5:104154009-104161646	q1	q2	NOTEST	0.240301	0.0494751	-2.28006	4.85701	0.205889	2.31188	0.0207843	1	no
ENSBTAG00000008338	ENSBTAG00000008338	PLCB1_BOVIN	13:789379-1695139	q1	q2	NOTEST	0.100275	0.0206541	-2.27947	4.85497	0.205973	2.07682	0.0378184	1	no
ENSBTAG00000000401	ENSBTAG00000000401	TTC24	3:14294998-14301746	q1	q2	OK	0.3427	0.070668	-2.27782	4.84944	0.206209	1.41556	0.156904	0.201207	no
ENSBTAG00000012442	ENSBTAG00000012442	CATB_BOVIN	8:7414944-7423429	q1	q2	OK	653.63	134.885	-2.27674	4.84583	0.206364	29.1302	0	0	yes
ENSBTAG00000027899	ENSBTAG00000027899	-	5:67852916-67930472	q1	q2	OK	0.528391	0.109074	-2.27631	4.84434	0.206425	5.29505	1.18984e-07	2.78588e-07	yes
ENSBTAG00000021916	ENSBTAG00000021916	MYL4	19:46925385-46938601	q1	q2	OK	1.14753	0.237189	-2.27442	4.83804	0.206696	2.9713	0.00296546	0.0047902	yes
ENSBTAG00000012254	ENSBTAG00000012254	-	9:24538386-24539681	q1	q2	OK	0.76155	0.157658	-2.27214	4.83039	0.207023	1.82843	0.0674857	0.091971	no
ENSBTAG00000039329	ENSBTAG00000039329	RAET1G	9:88232043-88500749	q1	q2	OK	3.22714	0.668725	-2.27077	4.82581	0.207219	6.01886	1.75652e-09	4.62156e-09	yes
ENSBTAG00000000923	ENSBTAG00000000923	HOXC13	5:26245921-26252315	q1	q2	OK	19.225	3.98435	-2.27057	4.82513	0.207248	13.845	0	0	yes
ENSBTAG00000026381	ENSBTAG00000026381	TMEM114	25:7515965-7530480	q1	q2	OK	0.318268	0.0659605	-2.27057	4.82513	0.207248	1.12789	0.259368	0.316772	no
ENSBTAG00000005797	ENSBTAG00000005797	A7MBF1_BOVIN	3:120634568-120644626	q1	q2	OK	0.293831	0.0608993	-2.27049	4.82487	0.207259	2.30716	0.0210459	0.0307922	yes
ENSBTAG00000021696	ENSBTAG00000021696	CALI_BOVIN	8:60821684-60823630	q1	q2	OK	0.287442	0.0595949	-2.27001	4.82327	0.207328	2.5931	0.00951164	0.0145182	yes
ENSBTAG00000000377	ENSBTAG00000000377	BMX	X:135201709-135238777	q1	q2	NOTEST	0.167971	0.0348688	-2.2682	4.81723	0.207589	1.58559	0.112832	1	no
ENSBTAG00000038955	ENSBTAG00000038955	LY6G6D	23:27411031-27412890	q1	q2	OK	1.01491	0.210696	-2.26812	4.81694	0.2076	1.8333	0.0667576	0.0910549	no
ENSBTAG00000016566	ENSBTAG00000016566	ITGA9	22:10946331-11306693	q1	q2	NOTEST	0.0128066	0.00265898	-2.26794	4.81636	0.207626	0.406791	0.684161	1	no
ENSBTAG00000047497	ENSBTAG00000047497	-	4:34171129-34172107	q1	q2	OK	1.74747	0.363009	-2.26719	4.81385	0.207734	4.34968	1.36338e-05	2.75317e-05	yes
ENSBTAG00000011976	ENSBTAG00000011976	Q148E6_BOVIN	3:99937184-99957408	q1	q2	NOTEST	0.118372	0.0246132	-2.26582	4.80929	0.207931	1.38657	0.165574	1	no
ENSBTAG00000046027	ENSBTAG00000046027	-	X:118705760-118706705	q1	q2	OK	0.572492	0.11932	-2.26242	4.79796	0.208422	2.17184	0.0298675	0.0428621	yes
ENSBTAG00000005615	ENSBTAG00000005615	CEACAM8	18:51138289-51157109	q1	q2	OK	7.29251	1.5201	-2.26225	4.79739	0.208447	12.1332	0	0	yes
ENSBTAG00000046666	ENSBTAG00000046666	A5PJR0_BOVIN	18:49888148-49890488	q1	q2	OK	3.17014	0.661037	-2.26174	4.79571	0.20852	5.27586	1.32138e-07	3.08366e-07	yes
ENSBTAG00000028359	ENSBTAG00000028359	U3	19:9738375-9847849	q1	q2	OK	0.919029	0.191676	-2.26144	4.7947	0.208564	0.365007	0.715106	0.767422	no
ENSBTAG00000010994	ENSBTAG00000010994	Q0VCU3_BOVIN	29:45242551-45248115	q1	q2	OK	78.6296	16.4165	-2.25993	4.78967	0.208782	29.344	0	0	yes
ENSBTAG00000020203	ENSBTAG00000020203	TMEM151A	29:44993274-44994609	q1	q2	OK	15.9935	3.33915	-2.25993	4.78969	0.208782	15.2139	0	0	yes
ENSBTAG00000006694	ENSBTAG00000006694	CXCL14	7:48661077-48669442	q1	q2	OK	1.01438	0.211878	-2.25928	4.78757	0.208876	4.56941	4.89096e-06	1.02047e-05	yes
ENSBTAG00000007626	ENSBTAG00000007626	IL2RG_BOVIN	X:84816192-84819838	q1	q2	OK	0.423487	0.088477	-2.25894	4.78641	0.208925	2.78044	0.00542853	0.00852591	yes
ENSBTAG00000042984	ENSBTAG00000042984	SNORA38	23:27475780-27488753	q1	q2	OK	40.8247	8.53092	-2.25867	4.7855	0.208965	1.88317	0.0596775	0.0820238	no
ENSBTAG00000012057	ENSBTAG00000012057	GIF	15:84361363-84380392	q1	q2	NOTEST	0.27498	0.057469	-2.25847	4.78484	0.208994	2.02123	0.0432558	1	no
ENSBTAG00000014831	ENSBTAG00000014831	PPR3C_BOVIN	26:13270025-13274922	q1	q2	OK	1.56893	0.328125	-2.25747	4.7815	0.209138	7.27949	3.35065e-13	1.07363e-12	yes
ENSBTAG00000046148	ENSBTAG00000046148	C17orf97	19:22856387-22859271	q1	q2	OK	26.6553	5.57679	-2.25692	4.77969	0.209218	11.673	0	0	yes
ENSBTAG00000008293	ENSBTAG00000008293	GPCPD1	13:48086529-48150177	q1	q2	OK	27.1417	5.68144	-2.25618	4.77726	0.209326	22.9353	0	0	yes
ENSBTAG00000004652	ENSBTAG00000004652	E1BLD8_BOVIN	7:3624278-3627734	q1	q2	OK	2.40419	0.503413	-2.25574	4.77578	0.209389	7.43137	1.0747e-13	3.52554e-13	yes
ENSBTAG00000038337	ENSBTAG00000038337	PERP1_BOVIN	7:52285862-52287943	q1	q2	OK	0.822549	0.172466	-2.25379	4.76934	0.209673	2.60533	0.00917857	0.014027	yes
ENSBTAG00000011374	ENSBTAG00000011374	A6QR17_BOVIN	8:90649982-90663196	q1	q2	NOTEST	0.0373634	0.00784163	-2.2524	4.76475	0.209875	1.00865	0.313144	1	no
ENSBTAG00000032643	ENSBTAG00000032643	-	25:12904754-12905757	q1	q2	NOTEST	0.0615897	0.0129354	-2.25137	4.76133	0.210025	0.478853	0.632044	1	no
ENSBTAG00000025108	ENSBTAG00000025108	-	9:44313103-44313896	q1	q2	NOTEST	0.073509	0.0154614	-2.24925	4.75436	0.210333	0.471212	0.637489	1	no
ENSBTAG00000031194	ENSBTAG00000031194	PHLDA2	29:49329503-49330559	q1	q2	OK	8.39597	1.76764	-2.24787	4.74982	0.210535	8.31258	0	0	yes
ENSBTAG00000033117	ENSBTAG00000033117	H31_BOVIN	23:31530229-31531841	q1	q2	OK	2.5068	0.528254	-2.24654	4.74544	0.210729	7.0989	1.25766e-12	3.92473e-12	yes
ENSBTAG00000000185	ENSBTAG00000000185	A5D7H9_BOVIN	X:731931-759484	q1	q2	OK	0.347679	0.0733101	-2.24567	4.74258	0.210856	3.85662	0.000114965	0.000213719	yes
ENSBTAG00000019227	ENSBTAG00000019227	-	18:57997836-58000711	q1	q2	NOTEST	0.128142	0.0270229	-2.2455	4.74198	0.210881	1.33263	0.182652	1	no
ENSBTAG00000020115	ENSBTAG00000020115	A3KMX3_BOVIN	19:55928560-55977738	q1	q2	OK	52.7073	11.1168	-2.24527	4.74123	0.210914	34.1903	0	0	yes
ENSBTAG00000009143	ENSBTAG00000009143	MC5R_BOVIN	24:43983879-43984857	q1	q2	NOTEST	0.165019	0.0348312	-2.24418	4.73768	0.211074	1.33172	0.182952	1	no
ENSBTAG00000005093	ENSBTAG00000005093	CES2	18:34757952-34770083	q1	q2	OK	2.17607	0.459623	-2.2432	4.73447	0.211217	7.40434	1.31894e-13	4.3051e-13	yes
ENSBTAG00000005052	ENSBTAG00000005052	GLP2R	19:29608714-29648238	q1	q2	NOTEST	0.0852653	0.0180235	-2.24208	4.73078	0.211381	1.29173	0.196449	1	no
ENSBTAG00000038757	ENSBTAG00000038757	HBM_BOVIN	25:208738-209518	q1	q2	OK	2.25209	0.476205	-2.24161	4.72924	0.21145	2.99971	0.00270237	0.00438569	yes
ENSBTAG00000038442	ENSBTAG00000038442	WDR87	18:47960540-47971681	q1	q2	OK	4.05645	0.858079	-2.24103	4.72736	0.211535	19.4449	0	0	yes
ENSBTAG00000024751	ENSBTAG00000024751	-	9:88232043-88500749	q1	q2	OK	13.7924	2.91891	-2.24037	4.72519	0.211632	9.06003	0	0	yes
ENSBTAG00000046868	ENSBTAG00000046868	-	14:253709-254630	q1	q2	OK	0.379701	0.0804122	-2.23938	4.72193	0.211777	1.61058	0.107271	0.141738	no
ENSBTAG00000015792	ENSBTAG00000015792	C12orf63	5:61229514-61336214	q1	q2	OK	2.3385	0.495297	-2.23922	4.72141	0.211801	5.18644	2.14348e-07	4.93892e-07	yes
ENSBTAG00000048186	ENSBTAG00000048186	-	4:61165437-61242549	q1	q2	OK	0.367981	0.0779965	-2.23815	4.71792	0.211958	1.91777	0.0551405	0.0761935	no
ENSBTAG00000021340	ENSBTAG00000021340	F1MZA9_BOVIN	15:31410514-31431842	q1	q2	NOTEST	0.142967	0.0303152	-2.23757	4.71602	0.212043	1.05086	0.293323	1	no
ENSBTAG00000002714	ENSBTAG00000002714	GNAI1_BOVIN	4:41160157-41266152	q1	q2	OK	11.0872	2.35118	-2.23743	4.71559	0.212064	19.0132	0	0	yes
ENSBTAG00000026417	ENSBTAG00000026417	HBA_BOVIN	25:214005-214773	q1	q2	OK	57.2926	12.16	-2.23621	4.71156	0.212243	16.0114	0	0	yes
ENSBTAG00000026418	ENSBTAG00000026418	HBA_BOVIN	25:210951-211719	q1	q2	OK	57.2926	12.16	-2.23621	4.71156	0.212243	16.0114	0	0	yes
ENSBTAG00000019980	ENSBTAG00000019980	DGKI	4:101862570-102182929	q1	q2	OK	7.64484	1.62289	-2.23592	4.71063	0.212286	16.4473	0	0	yes
ENSBTAG00000004092	ENSBTAG00000004092	E1BLG0_BOVIN	11:102813512-102949233	q1	q2	OK	4.87127	1.03458	-2.23525	4.70845	0.212384	9.25737	0	0	yes
ENSBTAG00000008063	ENSBTAG00000008063	Q5EA13_BOVIN	5:117151548-117233112	q1	q2	OK	9.22147	1.95915	-2.23477	4.70687	0.212455	14.3701	0	0	yes
ENSBTAG00000001090	ENSBTAG00000001090	C2orf77	2:26666109-26690420	q1	q2	OK	2.02654	0.430835	-2.23381	4.70375	0.212597	6.65623	2.80935e-11	8.1787e-11	yes
ENSBTAG00000033169	ENSBTAG00000033169	LAMB4	4:49384790-49473121	q1	q2	NOTEST	0.0953354	0.0202755	-2.23328	4.702	0.212675	1.69953	0.0892185	1	no
ENSBTAG00000031265	ENSBTAG00000031265	SVOPL	4:103101293-103189316	q1	q2	NOTEST	0.0731207	0.01556	-2.23244	4.69927	0.212799	1.37998	0.167592	1	no
ENSBTAG00000031454	ENSBTAG00000031454	PRSS42	22:53236357-53240657	q1	q2	OK	0.315792	0.067296	-2.23038	4.69258	0.213103	2.01746	0.0436474	0.0612486	no
ENSBTAG00000001851	ENSBTAG00000001851	CES1	18:24066408-24098654	q1	q2	NOTEST	0.152556	0.0325114	-2.23032	4.69238	0.213111	1.63548	0.101948	1	no
ENSBTAG00000006472	ENSBTAG00000006472	GPR143	X:143827183-143930209	q1	q2	OK	5.09359	1.08603	-2.22962	4.6901	0.213215	9.84632	0	0	yes
ENSBTAG00000044159	ENSBTAG00000044159	C4orf33	17:29105308-29116531	q1	q2	OK	8.47752	1.80773	-2.22946	4.68959	0.213239	7.72885	1.08802e-14	3.7468e-14	yes
ENSBTAG00000014172	ENSBTAG00000014172	FGD2	23:10892082-10918349	q1	q2	NOTEST	0.0989586	0.0211127	-2.22871	4.68716	0.213349	1.65836	0.0972454	1	no
ENSBTAG00000020869	ENSBTAG00000020869	A5PJV5_BOVIN	4:5253834-5347715	q1	q2	OK	4.79169	1.02242	-2.22855	4.68662	0.213373	8.48532	0	0	yes
ENSBTAG00000015046	ENSBTAG00000015046	MST1R	22:50928326-50941427	q1	q2	NOTEST	0.134566	0.0287137	-2.22851	4.68647	0.213379	2.69444	0.0070506	1	no
ENSBTAG00000016270	ENSBTAG00000016270	-	11:78507371-78514602	q1	q2	OK	0.44924	0.0959695	-2.22684	4.68107	0.213626	2.68328	0.00729046	0.0113061	yes
ENSBTAG00000004908	ENSBTAG00000004908	ACHE_BOVIN	19:27118516-27123114	q1	q2	NOTEST	0.213957	0.0457444	-2.22565	4.67723	0.213802	1.86218	0.0625774	1	no
ENSBTAG00000019158	ENSBTAG00000019158	MEX3A	3:14745266-14750311	q1	q2	OK	5.003	1.07007	-2.22509	4.6754	0.213885	9.2018	0	0	yes
ENSBTAG00000021251	ENSBTAG00000021251	A6QLV0_BOVIN	1:143509231-143535444	q1	q2	OK	3.6305	0.776531	-2.22505	4.67528	0.213891	13.1503	0	0	yes
ENSBTAG00000000301	ENSBTAG00000000301	Q2NKZ8_BOVIN	2:111598715-111600550	q1	q2	OK	1.20779	0.258339	-2.22503	4.67521	0.213894	5.28152	1.28117e-07	2.99326e-07	yes
ENSBTAG00000031059	ENSBTAG00000031059	LRC61_BOVIN	4:113562347-113562992	q1	q2	OK	12.8185	2.74387	-2.22394	4.67169	0.214056	8.82116	0	0	yes
ENSBTAG00000040360	ENSBTAG00000040360	CCDC166	14:2253176-2254950	q1	q2	OK	0.303289	0.0649683	-2.22289	4.66826	0.214212	2.36723	0.0179219	0.0264496	yes
ENSBTAG00000031462	ENSBTAG00000031462	A1A4P8_BOVIN	13:59979126-59980694	q1	q2	OK	0.321398	0.0688577	-2.22267	4.66757	0.214244	1.04553	0.295779	0.356906	no
ENSBTAG00000029640	ENSBTAG00000029640	U1	18:14877691-14877845	q1	q2	OK	31.7732	6.82662	-2.21857	4.65431	0.214854	2.21009	0.027099	0.0390925	yes
ENSBTAG00000046677	ENSBTAG00000046677	RTN4R	17:75103301-75104723	q1	q2	OK	14.1805	3.04685	-2.21852	4.65415	0.214862	14.872	0	0	yes
ENSBTAG00000046333	ENSBTAG00000046333	-	6:26345280-26350653	q1	q2	OK	0.65455	0.140664	-2.21825	4.65329	0.214902	6.84928	7.42229e-12	2.21959e-11	yes
ENSBTAG00000004885	ENSBTAG00000004885	DDR2	3:6672017-6847222	q1	q2	NOTEST	0.12491	0.0268587	-2.21742	4.65063	0.215026	2.16994	0.0300112	1	no
ENSBTAG00000000483	ENSBTAG00000000483	HYAL1_BOVIN	22:50600488-50601799	q1	q2	OK	35.9482	7.7352	-2.21641	4.64735	0.215176	16.594	0	0	yes
ENSBTAG00000009127	ENSBTAG00000009127	A7MAZ0_BOVIN	9:34889675-34893768	q1	q2	OK	25.1336	5.41515	-2.21454	4.64135	0.215455	26.8451	0	0	yes
ENSBTAG00000044047	ENSBTAG00000044047	C10orf140	13:22967367-22970068	q1	q2	NOTEST	0.267231	0.0576964	-2.21154	4.63168	0.215904	2.4026	0.0162788	1	no
ENSBTAG00000018940	ENSBTAG00000018940	EFCAB4B	5:106690780-106762334	q1	q2	OK	1.35032	0.291938	-2.20956	4.62537	0.2162	4.16631	3.09573e-05	6.0596e-05	yes
ENSBTAG00000002952	ENSBTAG00000002952	Q0V8E2_BOVIN	3:250259-276531	q1	q2	NOTEST	0.123224	0.0266892	-2.20695	4.617	0.216592	1.77087	0.0765815	1	no
ENSBTAG00000020489	ENSBTAG00000020489	SEMA6A	7:38732389-38795851	q1	q2	OK	9.46822	2.05197	-2.20608	4.61421	0.216722	19.5551	0	0	yes
ENSBTAG00000016159	ENSBTAG00000016159	NPBWR1	14:23263814-23264810	q1	q2	OK	2.0573	0.446141	-2.20518	4.61132	0.216858	4.74352	2.10039e-06	4.51198e-06	yes
ENSBTAG00000019623	ENSBTAG00000019623	GRID1	28:40732501-40966186	q1	q2	OK	1.14647	0.2487	-2.20472	4.60985	0.216927	6.0766	1.22757e-09	3.26308e-09	yes
ENSBTAG00000019066	ENSBTAG00000019066	F167A_BOVIN	8:7734138-7765335	q1	q2	NOTEST	0.0771662	0.0167538	-2.20348	4.60589	0.217113	1.60959	0.107487	1	no
ENSBTAG00000017174	ENSBTAG00000017174	SCN11A	22:12275352-12356183	q1	q2	NOTEST	0.0120699	0.0026219	-2.20272	4.60349	0.217228	0.676095	0.49898	1	no
ENSBTAG00000009161	ENSBTAG00000009161	TIGD4	17:4875453-4876992	q1	q2	OK	0.560879	0.121842	-2.20267	4.60333	0.217235	3.20429	0.00135398	0.00226844	yes
ENSBTAG00000000933	ENSBTAG00000000933	Q58DJ3_BOVIN	11:106364116-106372245	q1	q2	OK	2.61845	0.569181	-2.20175	4.60038	0.217374	6.8608	6.84763e-12	2.05189e-11	yes
ENSBTAG00000039993	ENSBTAG00000039993	-	3:12186724-12189914	q1	q2	NOTEST	0.228001	0.0496097	-2.20035	4.5959	0.217585	1.46284	0.143512	1	no
ENSBTAG00000027246	ENSBTAG00000027246	-	23:28918427-28920742	q1	q2	NOTEST	0.189219	0.0411927	-2.1996	4.59351	0.217698	1.24844	0.211871	1	no
ENSBTAG00000011467	ENSBTAG00000011467	E1BNQ5_BOVIN	29:43825076-43830937	q1	q2	OK	0.393548	0.0856811	-2.19949	4.59317	0.217715	2.15121	0.0314594	0.0450472	yes
ENSBTAG00000029954	ENSBTAG00000029954	bta-mir-24-1	8:82983414-83011315	q1	q2	OK	151.946	33.0999	-2.19866	4.59053	0.21784	1.0886	0.27633	0.335899	no
ENSBTAG00000013496	ENSBTAG00000013496	A7MBD9_BOVIN	5:45081461-45158699	q1	q2	OK	5.84643	1.27498	-2.19708	4.58551	0.218079	16.7302	0	0	yes
ENSBTAG00000018726	ENSBTAG00000018726	RIMS3	3:106154950-106169324	q1	q2	OK	13.4321	2.92965	-2.19688	4.58488	0.218109	11.4572	0	0	yes
ENSBTAG00000011667	ENSBTAG00000011667	PM20D2	9:61848878-61861891	q1	q2	OK	3.35377	0.731873	-2.19612	4.58245	0.218224	7.10173	1.23213e-12	3.84726e-12	yes
ENSBTAG00000038486	ENSBTAG00000038486	-	8:112092504-112094645	q1	q2	OK	2.43324	0.531164	-2.19565	4.58096	0.218295	5.48244	4.19498e-08	1.01282e-07	yes
ENSBTAG00000037239	ENSBTAG00000037239	5S_rRNA	18:10392424-10427784	q1	q2	OK	2.88803	0.631056	-2.19425	4.5765	0.218507	0.14321	0.886124	0.910987	no
ENSBTAG00000018487	ENSBTAG00000018487	Q32LN4_BOVIN	3:9901067-9930295	q1	q2	OK	2.97701	0.650555	-2.19412	4.57611	0.218526	8.23387	2.22045e-16	8.1706e-16	yes
ENSBTAG00000029069	ENSBTAG00000029069	U2	17:55551315-55573152	q1	q2	OK	1.47859	0.323191	-2.19377	4.57497	0.218579	0.334844	0.737743	0.787145	no
ENSBTAG00000019686	ENSBTAG00000019686	NCKAP1L	5:25662811-25708104	q1	q2	OK	16.162	3.53275	-2.19374	4.57491	0.218584	24.6857	0	0	yes
ENSBTAG00000010591	ENSBTAG00000010591	ZNF365	28:18549462-18572813	q1	q2	OK	2.8516	0.623602	-2.19308	4.57279	0.218684	6.27936	3.39964e-10	9.34843e-10	yes
ENSBTAG00000035708	ENSBTAG00000035708	-	8:65834277-65865690	q1	q2	NOTEST	0.0787271	0.0172214	-2.19266	4.57147	0.218748	0.9793	0.327432	1	no
ENSBTAG00000020119	ENSBTAG00000020119	RNF43	19:9548267-9612348	q1	q2	OK	1.38505	0.303043	-2.19234	4.57047	0.218796	7.28434	3.23297e-13	1.03654e-12	yes
ENSBTAG00000000376	ENSBTAG00000000376	P2RX3	15:81828653-81860220	q1	q2	NOTEST	0.185558	0.0406746	-2.18967	4.56201	0.219202	1.63873	0.10127	1	no
ENSBTAG00000008714	ENSBTAG00000008714	CLSTN2	1:129388512-129564179	q1	q2	OK	16.899	3.70571	-2.18912	4.56026	0.219285	20.6082	0	0	yes
ENSBTAG00000015569	ENSBTAG00000015569	ENKUR	13:26078956-26115031	q1	q2	OK	1.19821	0.262928	-2.18814	4.55718	0.219434	5.07074	3.96267e-07	8.96324e-07	yes
ENSBTAG00000024975	ENSBTAG00000024975	-	19:45520280-45538595	q1	q2	NOTEST	0.130792	0.0287116	-2.18757	4.55537	0.219521	1.36828	0.171223	1	no
ENSBTAG00000026088	ENSBTAG00000026088	LYSC2_BOVIN	5:44572854-44578603	q1	q2	NOTEST	0.0876329	0.0192455	-2.18695	4.55342	0.219615	0.795455	0.426349	1	no
ENSBTAG00000019273	ENSBTAG00000019273	DMRTC2	18:51702116-51707410	q1	q2	NOTEST	0.170904	0.0375754	-2.18532	4.54829	0.219863	1.32508	0.185144	1	no
ENSBTAG00000013366	ENSBTAG00000013366	A6QLV8_BOVIN	15:44175365-44203114	q1	q2	OK	9.59866	2.1136	-2.18313	4.54138	0.220198	19.1998	0	0	yes
[truncated: 22,916 more rows]
