# Supplementary material for: Transcriptome Characterization by RNA-seq Unravels the Mechanisms of Butyrate-Induced Epigenomic Regulation in Bovine Cells
Source: PLoS One. 2012 May 15;7(5):e36940. doi: 10.1371/journal.pone.0036940 (PMC3352864; doi:10.1371/journal.pone.0036940)
Supplement: Table S2 — Function annotation and comparisons. (XLSX) [file pone.0036940.s002.xlsx]

## Sheet: Sheet0
© 2000-2012 Ingenuity Systems, Inc. All rights reserved.
Category	Functions	Functions Annotation	p-Value	Predicted Activation State	Regulation z-score	Molecules	# Molecules
Cell Death	cell death	cell death	1.20E-47		1.903	AARS,AATK,ABCB1,ABCB6,ABCB7,ABCC1,ABCC10,ABCC3,ABCC4 (includes EG:10257),ABCE1,ABCG1,ABCG2,ABL1,ABL2,ABO,ACAA2,ACAT1,ACER2,ACHE,ACIN1,ACSL4,ACTB,ACTC1,ACTN4,ACVR1,ACVR1B,ACVR1C,ACVR2A,ACVR2B,ADA,ADAM15,ADAM17,ADAM8,ADAMTS20,ADAMTSL4,ADAR,ADCY5,ADI1 (includes EG:104923),ADK,ADM,ADNP,ADNP2,ADORA2A,ADORA2B,ADRB1,ADRB2,ADRBK1,ADRM1,AFP,AGAP2,AGAP3,AGER,AGPAT2,AGR2,AGRN,AGT,AHR,AHSA1,AHSP,AIF1 (includ…	2257
Gene Expression	expression	expression of RNA	6.29E-47		0.604	A2M,ABCG1,ABL1,ABLIM3,ABT1,ACO1,ACTR3,ACVR1,ACVR1B,ACVR1C,ACVR2B,ADA,ADORA2A,ADRB1,ADRB2,AEBP2,AFAP1L2,AFF1,AFF4,AGER,AGRN,AGT,AHCTF1,AHR,AKAP5,AKAP8L,AKIRIN2,AKT2,ALB,ALS2CR8,ANG,ANKRD1,ANKRD49,APBB1,APBB2,APOL3,APP,AR,ARHGAP35,ARHGEF11,ARID1A,ARID2,ARID3A,ARID4A,ARID4B,ARID5A,ARNT,ARNT2,ARNTL,ARRB1,ARRB2,ASCC1,ASCL2,ASH1L,ASH2L,ATF1 (includes EG:100040260),ATF2,ATF3,ATF4,ATF5,ATF6B,ATF7,ATF7IP,…	1544
Gene Expression	transcription	transcription	1.41E-45		0.141	A2M,ABCG1,ABL1,ABLIM3,ABT1,ACTR3,ACVR1,ACVR1B,ACVR1C,ACVR2B,ADORA2A,ADRB1,ADRB2,AEBP2,AFAP1L2,AFF1,AFF4,AGER,AGRN,AGT,AHCTF1,AHR,AKAP5,AKIRIN2,AKT2,ALS2CR8,ANG,ANKRD1,ANKRD49,AP1G2,APBB1,APBB2,APOL3,APP,AR,ARHGAP35,ARHGEF11,ARID1A,ARID2,ARID3A,ARID4A,ARID4B,ARID5A,ARNT,ARNT2,ARNTL,ARRB1,ARRB2,ASCC1,ASCL2,ASH1L,ASH2L,ATF1 (includes EG:100040260),ATF2,ATF3,ATF4,ATF5,ATF6B,ATF7,ATF7IP,ATM,ATN1,ATP1B…	1420
Gene Expression	transcription	transcription of RNA	1.12E-44		0.427	A2M,ABCG1,ABL1,ABLIM3,ABT1,ACTR3,ACVR1,ACVR1B,ACVR1C,ACVR2B,ADORA2A,ADRB1,ADRB2,AEBP2,AFAP1L2,AFF1,AFF4,AGER,AGRN,AGT,AHCTF1,AHR,AKAP5,AKIRIN2,AKT2,ALS2CR8,ANG,ANKRD1,ANKRD49,APBB1,APBB2,APOL3,APP,AR,ARHGAP35,ARHGEF11,ARID1A,ARID2,ARID3A,ARID4A,ARID4B,ARID5A,ARNT,ARNT2,ARNTL,ARRB1,ARRB2,ASCC1,ASCL2,ASH1L,ASH2L,ATF1 (includes EG:100040260),ATF2,ATF3,ATF4,ATF5,ATF6B,ATF7,ATF7IP,ATM,ATN1,ATP1B4,ATP2…	1394
Cell Death	apoptosis	apoptosis	4.58E-44		0.484	AARS,AATK,ABCB1,ABCC1,ABCE1,ABCG1,ABCG2,ABL1,ABL2,ABO,ACAA2,ACHE,ACIN1,ACSL4,ACTC1,ACTN4,ACVR1,ACVR1B,ACVR1C,ACVR2B,ADA,ADAM15,ADAM17,ADAM8,ADAMTS20,ADAMTSL4,ADAR,ADCY5,ADI1 (includes EG:104923),ADM,ADNP,ADORA2A,ADORA2B,ADRB1,ADRB2,ADRBK1,AFP,AGAP2,AGER,AGPAT2,AGRN,AGT,AHR,AHSA1,AHSP,AIF1 (includes EG:11629),AIFM1,AIFM2,AIFM3,AIMP1,AKAP1,AKAP12,AKAP8,AKR1B1,AKT1S1,AKT2,AKT3 (includes EG:10000),AK…	1732
Cellular Growth and Proliferation	growth	growth of cells	9.71E-38		-0.855	A2M,ABCB1,ABCB5,ABCC1,ABCG2,ABL1,ABL2,ABTB1,ACHE,ACIN1,ACPP,ACSL5,ACTB,ACTN1,ACTN4,ACVR1B,ACVR2A,ADAM10,ADAM15,ADAM17,ADAMTS15,ADAR,ADCY3,ADD2,ADIPOR1,ADIPOR2,ADM,ADNP2,ADRA1B,AFAP1L1,AFF1,AGER,AGT,AHCY,AHR,AHSA1,AHSG,AIF1 (includes EG:11629),AIMP1,AK2,AKAP12,AKIRIN2,AKR1B1,AKT1S1,AKT2,AKT3 (includes EG:10000),AKTIP,ALDH1A1,ALK,ALOX12,Alox12e,ALOX15,ALOX15B,ALOX5,AMH,ANAPC5,ANG,ANP32A,ANTXR1,ANXA…	1303
Cancer	tumorigenesis	tumorigenesis	6.12E-35		-1.823	1600029D21Rik,A1BG,AACS,ABCA5,ABCA7,ABCB1,ABCB11,ABCC1,ABCC2,ABCC3,ABCC4 (includes EG:10257),ABCD3,ABCG1,ABCG2,ABI2,ABL1,ABL2,ACADS,ACAT1,ACHE,ACLY,ACO1,ACOT7,ACOT9,ACOX1,ACOX2,ACP5,ACSL5,ACTB,ACTC1,ACTG2,ACTN1,ACTN3,ACTR10,ACTR3,ACVR2A,ADA,ADAM17,ADAM8,ADAM9,ADAMTS1,ADAMTS10,ADAMTS15,ADAMTS2,ADAMTS3,ADAMTS5,ADAMTS9,ADH1C (includes EG:11522),ADM,ADORA2A,ADORA2B,ADRA1B,ADRA1D,ADRA2A,ADRA2B,ADRB1,A…	2786
Cell Death	cell death	cell death of tumor cell lines	3.41E-34		0.959	AATK,ABCB1,ABCB7,ABCC1,ABCC4 (includes EG:10257),ABCE1,ABCG2,ABL1,ACER2,ACHE,ACVR1B,ACVR2B,ADAM17,ADI1 (includes EG:104923),ADM,ADNP,ADORA2A,ADRBK1,ADRM1,AFP,AGER,AGPAT2,AGR2,AGT,AHR,AHSA1,AIFM1,AIMP1,AKAP1,AKR1B1,AKT1S1,AKT2,AKT3 (includes EG:10000),ALB,ALK,ALOX12,ALOX15,ALOX5,ALS2,AMH,ANGPT2,ANKRD1,ANTXR2,AP2A2,APC,APOE,APOPT1,APP,AR,ARG1,ARL11,ARMC10,ARRB2,ASNS,ATF1 (includes EG:100040260),ATF…	963
Gene Expression	expression	expression of DNA	7.62E-33		1.030	ABCG1,ABL1,ABLIM3,ABT1,ACVR1,ACVR1B,ACVR2B,ADORA2A,ADRB2,AEBP2,AFAP1L2,AFF1,AFF4,AGRN,AGT,AHCTF1,AHR,AKIRIN2,AKT2,ALS2CR8,ANG,ANKRD1,ANKRD49,APBB1,APBB2,APP,AR,ARHGAP35,ARHGEF11,ARID1A,ARID2,ARID3A,ARID4A,ARID5A,ARNT,ARNT2,ARNTL,ARRB1,ARRB2,ASCC1,ASCL2,ASH1L,ASH2L,ATF1 (includes EG:100040260),ATF2,ATF3,ATF4,ATF5,ATF6B,ATF7,ATF7IP,ATN1,ATP1B4,ATP8B1,ATRX,ATXN1,ATXN7,ATXN7L3,AXIN1,BACH1,BACH2,BAHD1…	1148
Gene Expression	transcription	transcription of DNA	8.28E-33		1.072	ABCG1,ABL1,ABLIM3,ABT1,ACVR1,ACVR1B,ACVR2B,ADORA2A,ADRB2,AEBP2,AFAP1L2,AFF1,AFF4,AGRN,AGT,AHCTF1,AHR,AKIRIN2,AKT2,ALS2CR8,ANG,ANKRD1,ANKRD49,APBB1,APBB2,APP,AR,ARHGAP35,ARHGEF11,ARID1A,ARID2,ARID3A,ARID4A,ARID5A,ARNT,ARNT2,ARNTL,ARRB1,ARRB2,ASCC1,ASCL2,ASH1L,ASH2L,ATF1 (includes EG:100040260),ATF2,ATF3,ATF4,ATF5,ATF6B,ATF7,ATF7IP,ATN1,ATP1B4,ATP8B1,ATRX,ATXN1,ATXN7,ATXN7L3,AXIN1,BACH1,BACH2,BAHD1…	1134
Cellular Growth and Proliferation	proliferation	proliferation of cells	1.39E-31		0.925	A2M,ABCB1,ABCB7,ABCC4 (includes EG:10257),ABCG1,ABL1,ABO,ACAT1,ACER2,ACHE,ACPP,ACRBP,ACSL6,ACVR1,ACVR1C,ACVR2A,ADA,ADAM10,ADAM15,ADAM17,ADAMTS1,ADAMTS8,ADC,ADK,ADM,ADORA2A,ADORA2B,ADRA1B,ADRA1D,ADRA2A,ADRA2B,ADRB2,AFAP1,AFP,AGER,AGGF1,AGK,AGPS,AGT,AGTRAP,AHR,AIF1 (includes EG:11629),AIMP1,AKAP12,AKIRIN2,AKR1B1,AKT2,AKT3 (includes EG:10000),ALDH3A1,ALK,ALOX12,ALOX15B,ALOX5,AMH,AMOT,ANG,ANGPT1,ANGP…	1725
Cancer	neoplasia	neoplasia	7.48E-31		-1.608	1600029D21Rik,A1BG,AACS,ABCA5,ABCA7,ABCB1,ABCB11,ABCC1,ABCC2,ABCC3,ABCC4 (includes EG:10257),ABCD3,ABCG1,ABCG2,ABI2,ABL1,ABL2,ACADS,ACAT1,ACHE,ACLY,ACO1,ACOT7,ACOT9,ACOX1,ACOX2,ACP5,ACSL5,ACTB,ACTC1,ACTG2,ACTN1,ACTN3,ACTR10,ACTR3,ACVR2A,ADA,ADAM17,ADAM8,ADAM9,ADAMTS1,ADAMTS10,ADAMTS15,ADAMTS2,ADAMTS3,ADAMTS5,ADAMTS9,ADH1C (includes EG:11522),ADM,ADORA2A,ADORA2B,ADRA1B,ADRA1D,ADRA2A,ADRA2B,ADRB1,A…	2597
Cancer	cancer	cancer	2.11E-30		-1.580	1600029D21Rik,A1BG,AACS,ABCA5,ABCA7,ABCB1,ABCB11,ABCC1,ABCC2,ABCC3,ABCC4 (includes EG:10257),ABCD3,ABCG1,ABCG2,ABI2,ABL1,ABL2,ACADS,ACAT1,ACHE,ACLY,ACO1,ACOT7,ACOT9,ACOX1,ACOX2,ACP5,ACSL5,ACTB,ACTC1,ACTG2,ACTR10,ACTR3,ACVR2A,ADA,ADAM17,ADAM8,ADAM9,ADAMTS1,ADAMTS10,ADAMTS15,ADAMTS2,ADAMTS3,ADAMTS5,ADAMTS9,ADH1C (includes EG:11522),ADM,ADORA2A,ADORA2B,ADRA1B,ADRA1D,ADRA2A,ADRA2B,ADRB1,ADRB2,ADSL,AF…	2536
Cell Death	apoptosis	apoptosis of tumor cell lines	3.92E-29		0.791	AATK,ABCB1,ABCC1,ABCE1,ABCG2,ABL1,ACVR1B,ACVR2B,ADAM17,ADI1 (includes EG:104923),ADM,ADORA2A,ADRBK1,AFP,AGER,AGPAT2,AGT,AHR,AHSA1,AIFM1,AIMP1,AKAP1,AKR1B1,AKT1S1,AKT2,AKT3 (includes EG:10000),ALK,ALOX12,ALOX15,ALOX5,ALS2,AMH,ANGPT2,ANKRD1,AP2A2,APC,APOE,APOPT1,APP,AR,ARG1,ARL11,ARMC10,ARRB2,ASNS,ATF1 (includes EG:100040260),ATF2,ATF3,ATG10 (includes EG:641330),ATG5 (includes EG:11793),ATM,ATMIN,A…	814
Cellular Assembly and Organization	organization	organization of cytoplasm	2.83E-28		0.258	A2M,AATK,ABCA1,ABCC1,ABCD3,ABI2,ABL1,ABL2,ACP2,ACTN2,ACTR3,ADD1,ADNP,ADRA1B,ADRA2A,AGER,AGFG1,AGT,AKAP5,AKAP9,AKTIP,ALDOA,ALS2,ALS2CL,AMOT,ANGPT2,ANTXR1,AP1G1,APC,APOE,APP,AQP1,AR,ARAP1,ARFIP2,ARHGAP10,ARHGAP17,ARHGAP24,ARHGAP44,ARHGAP6,ARHGDIB,ARHGEF18,ARHGEF2,ARHGEF4,ARL1,ARL2,ARPC1A,ARPC2,ARSB,ATF3,ATL1,ATL3,ATP2B1,ATP2C1,ATP7A,AVIL,AXIN1,AXL,B3GNT1,B9D2,BACE1,BAG4,BAIAP2,BBS10,BBS4,BBS5,BCAR1…	687
Cellular Function and Maintenance	organization	organization of cytoplasm	2.83E-28		0.258	A2M,AATK,ABCA1,ABCC1,ABCD3,ABI2,ABL1,ABL2,ACP2,ACTN2,ACTR3,ADD1,ADNP,ADRA1B,ADRA2A,AGER,AGFG1,AGT,AKAP5,AKAP9,AKTIP,ALDOA,ALS2,ALS2CL,AMOT,ANGPT2,ANTXR1,AP1G1,APC,APOE,APP,AQP1,AR,ARAP1,ARFIP2,ARHGAP10,ARHGAP17,ARHGAP24,ARHGAP44,ARHGAP6,ARHGDIB,ARHGEF18,ARHGEF2,ARHGEF4,ARL1,ARL2,ARPC1A,ARPC2,ARSB,ATF3,ATL1,ATL3,ATP2B1,ATP2C1,ATP7A,AVIL,AXIN1,AXL,B3GNT1,B9D2,BACE1,BAG4,BAIAP2,BBS10,BBS4,BBS5,BCAR1…	687
Cell Cycle	cell cycle progression	cell cycle progression	4.73E-28		0.190	ABCG2,ABL1,ABTB1,ACLY,ACRBP,ACTL6A,ADM,ADORA2B,ADRA1B,ADRBK1,AFAP1L2,AGT,AHCY,AHR,AHSG,AIF1 (includes EG:11629),AK1,AKAP8,AKAP9,AKR1B1,ALDH3A1,ALOX15B,ANAPC4,ANKS1A,ANLN,ANP32A,APBB1,APBB2,APBB3,APC,APOE,APP,AR,ARG1,ARHGAP32,ARID1A,ARID3A,ARRB1,ASNS,ATF3,ATM,ATR,AURKA,AURKB,AXL,BAD,BAK1,BANP,BCAR1,BCL2A1,BCL2L1,BCL2L12,BCL6,BCR,BEX2,BHLHE40,BIRC5,BLM,BLNK,BMI1,BMP2,BMP4,BMP6,BMP7,BMPR1A,BMPR1B,BM…	718
Organismal Survival	organismal death	organismal death	1.45E-26	Decreased	-2.697	ABCA1,ABCA3,ABCB11,ABL1,ABL2,ACHE,ACLY,ACRBP,ACTC1,ADA,ADAM19,ADAR,ADH1C (includes EG:11522),ADH5 (includes EG:11532),ADK,ADNP,ADORA2A,ADRA1B,ADRA2A,ADRA2B,ADRB1,ADRB2,ADRBK1,AFG3L2,AGER,AGT,AHR,AKT3 (includes EG:10000),ALOX12,ALOX5,AMBP,ANGPT1,ANGPT2,ANK2,ANTXR2,APC,APLP2,APOE,APP,AQP11,AQP4,ARG1,ARNT,ARNT2,ASAH1,ASPH,ATF1 (includes EG:100040260),ATF2,ATF7,ATG5 (includes EG:11793),ATM,ATN1,ATOX1…	825
Cell Cycle	interphase	interphase	1.86E-25	Decreased	-2.439	ABCB1,ABL1,ACIN1,ACVR1,ACVR1B,ADRA1D,AGK,AHR,AKAP12,ALOX15,AMH,ANAPC10,ANAPC4,ANAPC5,APBB1,APBB2,APC,APOE,APP,AR,ARAF,ARG1,ARNT,ARRB1,ATF2,ATF3,ATF5,ATM,ATR,AURKA,BABAM1,BAD,BCAT1,BCL2L1,BCL3,BCR,BHLHE40,BIRC5,BLM,BMI1,BMP2,BMP4,BMP7,BRAF,BRCA1,BRCC3,BRE,BRSK1,BRSK2,BTG1,BTG2,BTK,BTRC,C11orf82,C13orf15,C9,CAMK1,CAMK2A,CAMK2D,CAMK2G,CAMKK1,CAMKK2,CAPNS1,CASP3,CAV1,CBX2,CCNA2,CCND1,CCND2,CCND3,CCNE…	484
Molecular Transport	transport	transport of molecule	1.01E-23	Increased	2.126	AAAS,ABCA1,ABCA3,ABCB1,ABCB11,ABCB6,ABCB7,ABCB8,ABCB9,ABCC1,ABCC2,ABCC3,ABCC4 (includes EG:10257),ABCC8,ABCD3,ABCD4,ABCF2,ABCG1,ABCG2,ABCG5,ACBD3,ACCN2,ACCN3,ACD,ACSL1,ACSL3,ACSL4,ACSL5,ACSL6,ADD2,ADHFE1,ADIPOR2,ADRA2A,ADRB1,ADRB2,AGFG1,AGT,AHI1,AKAP5,AKAP7,AKAP9,AKT2,AKTIP,ALB,ANKH,ANO1,ANP32A,ANXA6,AP1B1,AP1G1,AP1G2,AP1M2,AP1S1,AP2A2,AP2M1,AP3B1,AP3D1,AP3S2,AP4B1,AP4M1,AP4S1,APBA1,APOA1,APOA2,A…	862
Post-Translational Modification	phosphorylation	phosphorylation of protein	2.67E-23		1.739	AATK,ABL1,ABL2,ACVR1,ACVR1B,ACVR1C,ACVR2A,ACVR2B,ADAM10,ADAM17,ADM,ADRBK1,ADRBK2,AFAP1L2,AGER,AIF1 (includes EG:11629),AKAP5,AKT2,AKT3 (includes EG:10000),AKTIP,ALK,ALOX15,APOA1,APP,ARAF,ARR3 (includes EG:170735),ARRB2,ATM,ATR,AURKA,AURKB,AURKC,AXIN1,B3GNT5,BCR,BMP2,BMP4,BMPR1A,BMPR1B,BMPR2,BMX,BRAF,BRSK1,BRSK2,BTK,BUB1 (includes EG:100307076),BUB1B,C13orf15,CAB39,CALR,CAMK1,CAMK1G,CAMK2A,CAMK2D,…	489
Tissue Development	development	tissue development	1.26E-22		1.637	AACS,AARS,ABCA1,ABCA3,ABI2,ABL1,ABL2,ACADM,Acan,ACD,ACHE,ACOX1,ACP2,ACP5,ACRBP,ACTB,ACTC1,ACTR3,ACVR1,ACVR1B,ACVR2A,ACVR2B,ADA,ADAM10,ADAM15,ADAM17,ADAM19,ADAM8,ADAMTS1,ADAMTS2,ADAMTS4,ADAMTS8,ADAR,ADK,ADM,ADORA2A,ADRA1B,ADRA2A,ADRA2B,ADRB2,ADRBK1,AFF4,AFG3L2,AGER,AGFG1,AGGF1,AGPAT6,AGRN,AGT,AGTPBP1,AHR,AHSG,AIMP1,AKAP5,AKT2,AKTIP,ALB,ALDH1A1,ALDH3A2,ALK,ALOX12B,ALOX15,ALPL,ALS2,AMH,AMIGO1,AMOT,A…	1667
Cell Death	cell death	cell death of connective tissue cells	5.61E-22		0.463	ABCB1,ABCC1,ABCC4 (includes EG:10257),ABCE1,ABCG2,ABL1,ABL2,ACTB,ADM,AGER,AGT,AHR,AIFM1,AKT2,APP,ARID1A,ARNT,ARR3 (includes EG:170735),ARRB2,ASAH1,ATF2,ATF3,ATG5 (includes EG:11793),ATM,ATP6AP2,ATP6V1G2,AXIN1,BACH2,BAD,BAK1,BCL2A1,BCL2L1,BECN1,BGN,BIRC3,BIRC5,BLM,BMF,BMI1,BMP2,BMP4,BMPR1A,BMPR1B,BNIP3,BRCA1,BUB1 (includes EG:100307076),C11orf82,C1orf159,CA3,CABLES2,CALB1,CAMP,CAPNS1,CASP2,CASP3,C…	436
Cell Death	survival	cell survival	6.61E-21	Increased	2.234	ABCB1,ABCB6,ABCC1,ABCC3,ABCG2,ABL1,ACER2,ACHE,ACVR2A,ACVR2B,ADAM17,ADK,ADNP,ADORA2A,ADRBK1,AGER,AGRN,AIFM1,AIMP1,AK5,AKAP5,AKAP7,AKAP8L,AKT2,ALK,ALKBH8,ALOX12,ALPK2,AMH,ANGPT2,ANGPTL1,ANLN,ANTXR1,ANTXR2,APLF,APOE,APP,AQP3,AR,ARRB1,ATF2,ATF4,ATG12 (includes EG:361321),ATG3 (includes EG:171415),ATG4B,ATG5 (includes EG:11793),ATM,ATP5H,ATP7A,ATP7B,ATR,ATRX,AURKAIP1,AXL,B4GALT5,BAD,BAK1,BCAP31,BCL10,…	745
Gene Expression	activation	activation of DNA endogenous promoter	8.63E-21		1.290	ABL1,ABLIM3,ABT1,ACVR1B,ADRB2,AFF4,AGRN,AHR,AKIRIN2,AKT2,ANKRD1,APBB1,APP,AR,ARID2,ARID4A,ARNT,ARNT2,ARNTL,ARRB1,ARRB2,ASCL2,ASH1L,ASH2L,ATF1 (includes EG:100040260),ATF2,ATF4,ATF5,ATF7IP,ATN1,ATXN1,ATXN7,BACH1,BATF3,BCL3,BCL6,BCL6B,BCL9L,BHLHE23,BHLHE40,BLOC1S2,BLZF1,BMI1,BMP2,BMP3,BMP4,BMP6,BMP7,BMPR2,BPTF,BRCA1,BRD7,BRD8,BRWD1,BSX,BUD31,C19orf2,C1orf85,CALCOCO1,CALR,CAPRIN2,CASK,CAV1,CBFA2T2,C…	750
Cellular Movement	cell movement	cell movement	1.36E-20	Increased	3.172	A2M,ABCC1,ABHD2,ABI3,ABL1,ABL2,Acan,ACP5,ACTB,ACTN4,ACTR3,ACVR1,ADA,ADAM10,ADAM15,ADAM17,ADAM19,ADAM33,ADAM9,ADI1 (includes EG:104923),ADM,ADORA2A,ADRA2A,ADRB2,ADRBK1,AFAP1,AGER,AGK,AGR2,AGT,AHR,AIF1 (includes EG:11629),AIMP1,AKT2,AKT3 (includes EG:10000),ALB,ALCAM,ALOX12,ALOX15,ALOX15B,ALOX5,ALOX5AP,AMICA1,AMOT,AMOTL1,ANGPT1,ANGPT2,ANGPT4,ANGPTL1,ANGPTL3,ANGPTL4,ANKRD28,ANKS1A,ANPEP,ANXA3,AP2M1,…	1157
Cancer	carcinoma	carcinoma	1.03E-19		-1.664	1600029D21Rik,A1BG,AACS,ABCA5,ABCB1,ABCB11,ABCC1,ABCC2,ABCC3,ABCC4 (includes EG:10257),ABCD3,ABCG1,ABCG2,ABL1,ACADS,ACAT1,ACLY,ACO1,ACOT7,ACOT9,ACOX1,ACOX2,ACSL5,ACTC1,ACTG2,ACTR10,ACVR2A,ADA,ADAM17,ADAM9,ADAMTS1,ADAMTS15,ADAMTS3,ADAMTS5,ADH1C (includes EG:11522),ADORA2B,ADRA1B,ADRA1D,ADRA2A,ADRA2B,ADRB1,ADRB2,ADSL,AFAP1,AFF1,AFP,AGER,AGPAT2,AGPAT6,AGPAT9,AGR2,AHCY,AHR,AHSG,AIMP1,AKAP1,AKT2,AKT3 …	1983
Cancer	solid tumor	solid tumor	3.90E-19		-1.721	1600029D21Rik,A1BG,AACS,ABCA5,ABCB1,ABCB11,ABCC1,ABCC2,ABCC3,ABCC4 (includes EG:10257),ABCD3,ABCG1,ABCG2,ABL1,ACADS,ACAT1,ACLY,ACO1,ACOT7,ACOT9,ACOX1,ACOX2,ACP5,ACSL5,ACTC1,ACTG2,ACTR10,ACVR2A,ADA,ADAM17,ADAM9,ADAMTS1,ADAMTS15,ADAMTS3,ADAMTS5,ADH1C (includes EG:11522),ADM,ADORA2A,ADORA2B,ADRA1B,ADRA1D,ADRA2A,ADRA2B,ADRB1,ADRB2,ADSL,AFAP1,AFAP1L1,AFF1,AFP,AGER,AGPAT2,AGPAT6,AGPAT9,AGR2,AHCY,AHR,AH…	2023
Infectious Disease	infection	infection by HIV-1	5.50E-19	Decreased	-3.643	AASS,ABTB1,ACACB,ACADSB,ADAM10,ADAMTS5,ADRBK1,AEBP2,AFG3L1,AFG3L2,AGAP2,AGBL5,AHCTF1,ALDH1A1,ALDH2,ALKBH3,ALKBH8,AMDHD2,ANKRD43,ANKRD6,ANKRD9,AP1G2,AP2M1,AQR,ARGLU1,ARHGAP32,ARHGEF19,ARID1A,ARID5A,ARPC1A,ASXL2,ATG12 (includes EG:361321),ATG16L2,ATMIN,ATOX1,ATP5B,BAG6,BAHD1,BCLAF1,BCR,BMP1,BRCA1,BTG2,C11orf9,C19orf50,C6orf1,CA2,CACNA2D1,CACNA2D2,CACNA2D4,CALCOCO1,CAMK1D,CAMKK2,CANT1,CAPN6,CAV2,CCD…	548
Cellular Development	differentiation	differentiation	9.00E-19	Increased	4.730	A2M,ABCG2,ABL1,ABL2,ACADM,ACTR3,ACVR1,ACVR1B,ACVR1C,ACVR2A,ACVR2B,ADA,ADAM10,ADAM17,ADAMTS20,ADAMTS9,ADD1,ADIG,ADK,ADM,ADNP2,ADRA2B,ADRB1,ADRB2,AGER,AGRN,AGT,AGTPBP1,AHR,AHSA1,AHSP,AIFM1,AKAP5,AKT2,ALAS2,ALB,ALDH6A1,ALG5,ALOX12,AMH,AP3B1,AP3D1,APBB1,APC,APOE,APP,AQP3,AR,ARHGAP26,ARHGAP32,ARHGEF25,ARL4A,ARNT,ASB2,ASCL2,ASPM,ASPN,ATF2,ATF4,ATF5,ATM,ATN1,ATP2B2,ATP2C1,ATP7A,AUP1,AXIN1,AXL,AZGP1,B4GA…	1190
Cancer	gastrointestinal tract cancer	gastrointestinal tract cancer	9.30E-19		-0.190	ABCA5,ABCB1,ABCC3,ABCD3,ABCG2,ABL1,ACADS,ACLY,ACOT7,ACOX1,ACOX2,ACSL5,ACVR2A,ADAMTS1,ADAMTS15,ADORA2A,ADRA1B,ADRA1D,ADSL,AHCY,AIMP1,AKR1B1,ALAS1,ALB,ANGPT2,ANGPTL2,ANKRD35,ANKRD9,ANPEP,ANTXR1,ANXA11,ANXA4,APC,APOE,AQP3,AR,ARAF,ARG2 (includes EG:11847),ARHGAP18,ATF3,ATG4B,ATP2A2,AURKA,AXIN1,B4GALNT1,B4GALT1,BAK1,BCAS1,BCR,BECN1,BIRC5,BIRC7,BMP2,BMP3,BMP7,BNIP3,BRAF,BRCA1,BST2,BUB1B,BYSL,C10orf116,…	763
Gastrointestinal Disease	gastrointestinal tract cancer	gastrointestinal tract cancer	9.30E-19		-0.190	ABCA5,ABCB1,ABCC3,ABCD3,ABCG2,ABL1,ACADS,ACLY,ACOT7,ACOX1,ACOX2,ACSL5,ACVR2A,ADAMTS1,ADAMTS15,ADORA2A,ADRA1B,ADRA1D,ADSL,AHCY,AIMP1,AKR1B1,ALAS1,ALB,ANGPT2,ANGPTL2,ANKRD35,ANKRD9,ANPEP,ANTXR1,ANXA11,ANXA4,APC,APOE,AQP3,AR,ARAF,ARG2 (includes EG:11847),ARHGAP18,ATF3,ATG4B,ATP2A2,AURKA,AXIN1,B4GALNT1,B4GALT1,BAK1,BCAS1,BCR,BECN1,BIRC5,BIRC7,BMP2,BMP3,BMP7,BNIP3,BRAF,BRCA1,BST2,BUB1B,BYSL,C10orf116,…	763
Cancer	transformation	transformation	1.07E-18		0.500	ABL1,ACOX1,ADM,AKT2,AKT3 (includes EG:10000),ALDH1A1,ALK,ANP32A,APC,ARAF,ARHGAP32,ARHGEF1,ARHGEF3,ASPH,ATF3,ATIC,ATM,AURKA,AURKB,AXL,BCAR1,BCKDHA,BCL2A1,BCL2L1,BCL6,BCL9L,BCR,BIRC5,BMI1,BMP2,BRAF,BRCA1,BTG2,CAT,CAV1,CBL,CBX2,CCNA2,CCND1,CCND2,CCND3,CCNE1,CCNE2,CD4,CDC25A,CDC25B,CDC37,CDH1,CDK4,CDK6,CDKN1A,CDKN1B,CDKN1C,CDKN2B,CHRM1,CHRM5,CLTC,CLU,COL1A1,COL1A2,CRK,CSF1 (includes EG:12977),CSF1R,C…	324
Cancer	colorectal cancer	colorectal cancer	1.31E-18		-0.437	ABCA5,ABCB1,ABCC3,ABCD3,ABCG2,ABL1,ACADS,ACLY,ACOT7,ACOX1,ACOX2,ACSL5,ACVR2A,ADAMTS1,ADAMTS15,ADRA1B,ADRA1D,ADSL,AHCY,AIMP1,ALAS1,ALB,ANGPT2,ANGPTL2,ANKRD35,ANKRD9,ANPEP,ANTXR1,ANXA11,ANXA4,APC,AQP3,AR,ARAF,ARG2 (includes EG:11847),ARHGAP18,ATF3,ATP2A2,AURKA,AXIN1,B4GALNT1,B4GALT1,BAK1,BCAS1,BCR,BECN1,BIRC5,BIRC7,BMP2,BMP3,BMP7,BNIP3,BRAF,BST2,BUB1B,BYSL,C10orf116,C10orf54,C12orf24,C12orf48,C15or…	683
Gastrointestinal Disease	colorectal cancer	colorectal cancer	1.31E-18		-0.437	ABCA5,ABCB1,ABCC3,ABCD3,ABCG2,ABL1,ACADS,ACLY,ACOT7,ACOX1,ACOX2,ACSL5,ACVR2A,ADAMTS1,ADAMTS15,ADRA1B,ADRA1D,ADSL,AHCY,AIMP1,ALAS1,ALB,ANGPT2,ANGPTL2,ANKRD35,ANKRD9,ANPEP,ANTXR1,ANXA11,ANXA4,APC,AQP3,AR,ARAF,ARG2 (includes EG:11847),ARHGAP18,ATF3,ATP2A2,AURKA,AXIN1,B4GALNT1,B4GALT1,BAK1,BCAS1,BCR,BECN1,BIRC5,BIRC7,BMP2,BMP3,BMP7,BNIP3,BRAF,BST2,BUB1B,BYSL,C10orf116,C10orf54,C12orf24,C12orf48,C15or…	683
Cancer	colorectal tumor	colorectal tumor	1.33E-18		-0.437	ABCA5,ABCB1,ABCC3,ABCD3,ABCG2,ABL1,ACADS,ACLY,ACOT7,ACOX1,ACOX2,ACSL5,ACVR2A,ADAMTS1,ADAMTS15,ADRA1B,ADRA1D,ADSL,AHCY,AIMP1,AKR1B1,ALAS1,ALB,ANGPT2,ANGPTL2,ANKRD35,ANKRD9,ANPEP,ANTXR1,ANXA11,ANXA4,APC,AQP3,AR,ARAF,ARG2 (includes EG:11847),ARHGAP18,ATF3,ATP2A2,AURKA,AXIN1,B4GALNT1,B4GALT1,BAK1,BCAS1,BCR,BECN1,BIRC5,BIRC7,BMP2,BMP3,BMP7,BNIP3,BRAF,BRF1 (includes EG:2972),BST2,BUB1B,BYSL,C10orf116,C…	686
Gastrointestinal Disease	colorectal tumor	colorectal tumor	1.33E-18		-0.437	ABCA5,ABCB1,ABCC3,ABCD3,ABCG2,ABL1,ACADS,ACLY,ACOT7,ACOX1,ACOX2,ACSL5,ACVR2A,ADAMTS1,ADAMTS15,ADRA1B,ADRA1D,ADSL,AHCY,AIMP1,AKR1B1,ALAS1,ALB,ANGPT2,ANGPTL2,ANKRD35,ANKRD9,ANPEP,ANTXR1,ANXA11,ANXA4,APC,AQP3,AR,ARAF,ARG2 (includes EG:11847),ARHGAP18,ATF3,ATP2A2,AURKA,AXIN1,B4GALNT1,B4GALT1,BAK1,BCAS1,BCR,BECN1,BIRC5,BIRC7,BMP2,BMP3,BMP7,BNIP3,BRAF,BRF1 (includes EG:2972),BST2,BUB1B,BYSL,C10orf116,C…	686
Neurological Disease	encephalopathy	encephalopathy	1.68E-18		-1.730	A2M,ABCA1,ABCB7,ABCG2,ACADM,ACAT1,ACHE,ACP2,ACTB,ACTN2,ACTN3,ADCK3,ADCY5,ADCY7,ADORA2A,ADORA2B,ADRA1B,ADRA1D,ADRA2A,ADRA2B,ADRB1,ADRB2,AGER,AGXT2L1,AHCY,AHR,AK1,AKT3 (includes EG:10000),ALAS1,ALB,ALCAM,ALDH2,ALDH5A1,ALDH6A1,ALDH7A1,ALOX5,ALS2,ANKRD11,ANO6,AP1S1,AP3M2,APOA1,APOA4,APOD,APOE,APP,AQP1,AQP4,ARHGAP32,ARHGAP44,ARHGAP6,ARHGEF1,ARIH2,ARL3,ARMCX2,ARMCX3,ARR3 (includes EG:170735),ARRB1,ASTN…	877
Cancer	transformation	cell transformation	2.04E-18		0.342	ABL1,ACOX1,ADM,AKT2,AKT3 (includes EG:10000),ALK,ANP32A,APC,ARAF,ARHGAP32,ARHGEF1,ARHGEF3,ASPH,ATF3,ATIC,ATM,AURKA,AURKB,AXL,BCAR1,BCKDHA,BCL2A1,BCL2L1,BCL6,BCL9L,BCR,BIRC5,BMI1,BMP2,BRAF,BRCA1,BTG2,CAT,CAV1,CBL,CCNA2,CCND1,CCND2,CCND3,CCNE1,CCNE2,CD4,CDC25A,CDC25B,CDH1,CDK4,CDK6,CDKN1A,CDKN1B,CDKN1C,CDKN2B,CHRM1,CHRM5,CLTC,CLU,COL1A1,COL1A2,CRK,CSF1 (includes EG:12977),CSF1R,CSF2RB,CTNNB1,DAPK1,…	313
Cellular Movement	migration	migration of cells	2.81E-18	Increased	2.903	A2M,ABCC1,ABHD2,ABI3,ABL1,ABL2,Acan,ACP5,ACTN4,ACTR3,ACVR1,ADA,ADAM10,ADAM15,ADAM17,ADAM19,ADAM33,ADAM9,ADI1 (includes EG:104923),ADM,ADORA2A,ADRA2A,ADRB2,ADRBK1,AFAP1,AGER,AGK,AGT,AHR,AIF1 (includes EG:11629),AIMP1,AKT2,AKT3 (includes EG:10000),ALB,ALCAM,ALOX12,ALOX15,ALOX15B,ALOX5,ALOX5AP,AMICA1,AMOT,AMOTL1,ANGPT1,ANGPT2,ANGPT4,ANGPTL1,ANGPTL3,ANGPTL4,ANKRD28,ANKS1A,ANPEP,ANXA3,AP2M1,APBA1,APBB…	1023
Cell Death	cell death	cell death of organ	4.04E-18		0.548	AATK,ABCC1,ABCG2,ABL1,ACHE,ADA,ADCY5,ADM,ADNP,ADORA2A,ADORA2B,ADRB1,ADRB2,ADRBK1,AGER,AGT,AHR,AIFM3,AKT3 (includes EG:10000),ALOX15,AMH,ANGPT1,APOC3,APOE,APP,APRT,ARNT,ATF7,ATG5 (includes EG:11793),ATM,ATP13A2,ATP1A1,ATP1A4,ATP2A1,ATP2B2,ATP2C1,ATR,ATXN1,AURKA,AXL,B4GALNT1,BAD,BAG4,BAK1,BCL10,BCL2A1,BCL2L1,BCL2L2,BCL6,BDNF,BECN1,BHLHE23,BIRC3,BIRC5,BMF,BMP2,BMP4,BMP7,BNIP3,BOK,BRCA1,BTG1,BTG2,C8o…	589
Cellular Development	differentiation	differentiation of cells	7.02E-18	Increased	4.574	A2M,ABCG2,ABL1,ACADM,ACTR3,ACVR1,ACVR1B,ACVR1C,ACVR2A,ACVR2B,ADA,ADAM10,ADAM17,ADAMTS20,ADAMTS9,ADD1,ADIG,ADK,ADM,ADNP2,ADRA2B,ADRB1,ADRB2,AGER,AGRN,AGT,AGTPBP1,AHR,AHSP,AIFM1,AKAP5,AKT2,ALAS2,ALB,ALDH6A1,ALG5,ALOX12,AMH,AP3B1,AP3D1,APBB1,APC,APP,AQP3,AR,ARHGAP26,ARHGAP32,ARL4A,ARNT,ASB2,ASCL2,ASPM,ASPN,ATF2,ATF4,ATF5,ATM,ATN1,ATP2B2,ATP2C1,ATP7A,AUP1,AXIN1,AXL,AZGP1,B4GALNT1,BAD,BAIAP2,BCL2A1,BC…	1120
Cell Death	survival	survival of tumor cell lines	8.27E-18		0.807	ABCB6,ABCC1,ABCC3,ABCG2,ABL1,ACVR2A,ACVR2B,ADAM17,ADK,ADRBK1,AGER,AIFM1,AIMP1,AK5,AKAP5,AKAP7,AKAP8L,AKT2,ALK,ALOX12,ALPK2,ANGPT2,ANTXR1,ANTXR2,APLF,APP,AQP3,AR,ATF2,ATG3 (includes EG:171415),ATG4B,ATM,ATP7B,ATR,ATRX,AURKAIP1,AXL,BCL2A1,BCL2L1,BDNF,BECN1,BEX2,BHLHE40,BIRC5,BLM,BMI1,BRAF,BRCA1,BUB1B,CA2,CA9,CADM1,CAMK1G,CAMK2D,CARD10,CASK,CASP2,CASP3,CAT,CAV1,CBL,CCND1,CD40,CD55,CDC42BPA,CDH1,CDK2…	346
Cancer	benign tumor	benign tumor	1.25E-17		-0.676	1600029D21Rik,ABI2,ABL1,ACAT1,ACHE,ACTC1,ACTG2,ACTN3,ADM,ADRA1B,ADRA1D,ADRA2A,ADRA2B,ADRB1,ADRB2,AFF1,AGRN,AHR,AIP,AK2,AKAP8L,ALB,ALCAM,ALDH1A1,ALDH2,ALDOA,ALDOC,AMH,ANAPC10,ANGPT2,ANGPTL1,ANTXR2,ANXA5,APC,APOA1,AR,ARAF,ARFGEF2,ARHGEF2,ARIH2,ARL4D,ARNT,ARSE,ASB5,ASH2L,ASS1,ATF2,ATP1A1,ATP1A2,ATP1A4,ATP2A1,ATRN,ATRNL1,AURKB,AXIN1,BCL10,BCL3,BCR,BDH1 (includes EG:100037356),BDNF,BIRC5,BMP4,BRAF,BTR…	528
Infectious Disease	infection	infection by virus	2.60E-17	Decreased	-3.314	AASS,ABCC2,ABI2,ABTB1,ACACB,ACADSB,ACHE,ACOT12,ACSL1,ACTN1,ADA,ADAM10,ADAMTS5,ADRBK1,AEBP2,AFG3L1,AFG3L2,AGAP2,AGBL5,AHCTF1,AIMP1,AKAP6,ALB,ALDH18A1,ALDH1A1,ALDH2,ALDH5A1,ALKBH3,ALKBH8,ALOX12,ALOX5,AMDHD2,AMY2A,ANKRD43,ANKRD6,ANKRD9,ANPEP,AP1B1,AP1G2,AP1S1,AP2M1,APOBEC3B,AQPEP,AQR,AR,ARGLU1,ARHGAP18,ARHGAP32,ARHGEF19,ARID1A,ARID5A,ARL4C,ARNT2,ARPC1A,ARPC3,ARRB1,ASGR2,ASXL2,ATG12 (includes EG:3613…	983
Cellular Assembly and Organization	organization	organization of cytoskeleton	7.90E-17		0.283	A2M,AATK,ABCC1,ABI2,ABL1,ABL2,ACTN2,ACTR3,ADD1,ADNP,ADRA1B,ADRA2A,AGER,AGFG1,AGT,AKAP5,AKAP9,ALDOA,AMOT,ANGPT2,ANTXR1,AP1G1,APC,APOE,APP,AQP1,AR,ARAP1,ARFIP2,ARHGAP10,ARHGAP17,ARHGAP24,ARHGAP44,ARHGAP6,ARHGDIB,ARHGEF18,ARHGEF2,ARHGEF4,ARL2,ARPC1A,ARPC2,ATF3,ATP2B1,ATP2C1,AVIL,AXIN1,AXL,B3GNT1,B9D2,BACE1,BAG4,BAIAP2,BBS10,BBS4,BBS5,BCAR1,BCL6,BCR,BDNF,BFSP2,BIRC5,BST2,C1QA,C1QBP,CALR,CAMSAP3,CAP2,…	552
Cellular Function and Maintenance	organization	organization of cytoskeleton	7.90E-17		0.283	A2M,AATK,ABCC1,ABI2,ABL1,ABL2,ACTN2,ACTR3,ADD1,ADNP,ADRA1B,ADRA2A,AGER,AGFG1,AGT,AKAP5,AKAP9,ALDOA,AMOT,ANGPT2,ANTXR1,AP1G1,APC,APOE,APP,AQP1,AR,ARAP1,ARFIP2,ARHGAP10,ARHGAP17,ARHGAP24,ARHGAP44,ARHGAP6,ARHGDIB,ARHGEF18,ARHGEF2,ARHGEF4,ARL2,ARPC1A,ARPC2,ATF3,ATP2B1,ATP2C1,AVIL,AXIN1,AXL,B3GNT1,B9D2,BACE1,BAG4,BAIAP2,BBS10,BBS4,BBS5,BCAR1,BCL6,BCR,BDNF,BFSP2,BIRC5,BST2,C1QA,C1QBP,CALR,CAMSAP3,CAP2,…	552
Developmental Disorder	inborn error of metabolism	inborn error of metabolism	1.13E-16		0.786	AASS,ABCA1,ABCC2,ABCC3,ABCD1,ABHD5,ACAA1,ACAD8,ACADL,ACADM,ACADS,ACADVL,ACAT1,ADA,ADAMTS2,ADAMTS4,ADSL,AGL,AGXT,ALAD,ALDH3A2,ALDH4A1,ALDH5A1,ALG1,ALG2,ALG3,ALG6,ALG8,ALG9,ALOX5,ALPL,AMT,AP3B1,APOA1,APOE,APP,ARG1,ARSA,ARSB,ASAH1,ASL,ASS1,ATP6V0A2,ATP7A,ATP7B,ATPAF2,B4GALT1,BCKDHA,BCKDHB,BDNF,BGN,BLOC1S3,BMP2,BTD,C10orf2,CACNA1F,CAV1,CBS,CD14,CD36,CD47,CD55,CDC14B,CLCN6,CLCN7,CLN5,CLN6,CLN8,COG1 (i…	270
Genetic Disorder	inborn error of metabolism	inborn error of metabolism	1.13E-16		0.786	AASS,ABCA1,ABCC2,ABCC3,ABCD1,ABHD5,ACAA1,ACAD8,ACADL,ACADM,ACADS,ACADVL,ACAT1,ADA,ADAMTS2,ADAMTS4,ADSL,AGL,AGXT,ALAD,ALDH3A2,ALDH4A1,ALDH5A1,ALG1,ALG2,ALG3,ALG6,ALG8,ALG9,ALOX5,ALPL,AMT,AP3B1,APOA1,APOE,APP,ARG1,ARSA,ARSB,ASAH1,ASL,ASS1,ATP6V0A2,ATP7A,ATP7B,ATPAF2,B4GALT1,BCKDHA,BCKDHB,BDNF,BGN,BLOC1S3,BMP2,BTD,C10orf2,CACNA1F,CAV1,CBS,CD14,CD36,CD47,CD55,CDC14B,CLCN6,CLCN7,CLN5,CLN6,CLN8,COG1 (i…	270
Metabolic Disease	inborn error of metabolism	inborn error of metabolism	1.13E-16		0.786	AASS,ABCA1,ABCC2,ABCC3,ABCD1,ABHD5,ACAA1,ACAD8,ACADL,ACADM,ACADS,ACADVL,ACAT1,ADA,ADAMTS2,ADAMTS4,ADSL,AGL,AGXT,ALAD,ALDH3A2,ALDH4A1,ALDH5A1,ALG1,ALG2,ALG3,ALG6,ALG8,ALG9,ALOX5,ALPL,AMT,AP3B1,APOA1,APOE,APP,ARG1,ARSA,ARSB,ASAH1,ASL,ASS1,ATP6V0A2,ATP7A,ATP7B,ATPAF2,B4GALT1,BCKDHA,BCKDHB,BDNF,BGN,BLOC1S3,BMP2,BTD,C10orf2,CACNA1F,CAV1,CBS,CD14,CD36,CD47,CD55,CDC14B,CLCN6,CLCN7,CLN5,CLN6,CLN8,COG1 (i…	270
Cellular Function and Maintenance	homeostasis	cellular homeostasis	1.22E-16	Increased	3.616	ABCB5,ABCB7,ABCC1,ABCC3,ABCD3,ABL1,ACAP1,ACCN2,ACO1,ADA,ADAM17,ADM,ADORA2A,ADRA1B,ADRA2A,ADRB2,ADRBK1,AFF1,AGER,AGT,AHR,AIFM3,AKT2,ALAS2,ALB,ALDOA,ALOX15,AMOT,AMOTL1,ANGPT1,ANGPT2,ANXA7,AP2A2,AP3B1,AP3D1,APC,APLP2,APOE,APP,AQP1,AQP3,AQP4,ARHGAP35,ARID1A,ARSA,ARSB,ASPSCR1,ATF4,ATG10 (includes EG:641330),ATG12 (includes EG:361321),ATG13 (includes EG:362164),ATG14 (includes EG:100504663),ATG16L1,ATG…	776
Cell Death	cell death	neuronal cell death	1.40E-16		-0.228	AARS,AATK,ABCC1,ABL1,ACHE,ADA,ADAM8,ADNP,ADORA2A,ADRBK1,AGAP2,AGAP3,AGRN,AGT,AIFM1,AKT1S1,ALK,ALOX12,ALOX15,ALOX5,ALS2,AMH,APC,APOE,APP,ATF3,ATG12 (includes EG:361321),ATG5 (includes EG:11793),ATM,ATN1,ATP13A2,ATP1A2,ATP2C1,ATP7A,ATRX,AXL,B4GALNT1,BACE1,BAD,BAG5,BAK1,BCL2L1,BCL2L2,BDNF,BIRC5,BMP2,BMP4,BMPR1B,BNIP3,BOK,BRAF,CACNA1A,CACNA2D2,CALB1,CAMK2A,CAPNS1,CASP2,CASP3,CASP6,CASP7,CASP8,CASP9 (…	396
Cell Signaling	protein kinase cascade	protein kinase cascade	1.75E-16		1.179	ADAM9,ADRA1B,ADRA2B,ADRB2,AGT,AKAP11,APC,APOL3,AR,ARAF,ATP2C1,ATP6AP2,AZI2,BCL10,BCL3,BMP4,BNIP2,BRAF,BRAP,BST2,BTK,BTRC,CAMKK2,CANT1,CARD11,CARD6,CARD9,CAV1,CAV3,CC2D1A,CD36,CDON,CHUK,CSNK2B,CTNNB1,CXXC5,DAB2IP,DAG1,DAPK1,DAPK3,DNAJA3,DOK2,DOK4,DUSP16,DUSP3,ECM1 (includes EG:100332249),ECT2,EDA,EDN1,EEF1D,EGFR,ERCC6,F2R,F2RL1,FAIM,FGF1,FGF13,FGF2,FGF8,FGFR1,FGFR2,FGFR3,FKBP1A,FLNA,FLT1,FLT3,FYB,…	276
Infectious Disease	infection	infection of cells	2.39E-16	Decreased	-3.222	AASS,ABTB1,ACACB,ACADSB,ADAM10,ADAMTS5,ADRBK1,AEBP2,AFG3L1,AFG3L2,AGAP2,AGBL5,AHCTF1,ALKBH3,ALKBH8,AMDHD2,ANKRD43,ANKRD6,ANKRD9,AP1B1,AP1G2,AP2M1,APOBEC3B,AQR,ARGLU1,ARHGAP32,ARHGEF19,ARID1A,ARID5A,ARPC1A,ARPC3,ARRB1,ASGR2,ASXL2,ATG12 (includes EG:361321),ATG16L2,ATG5 (includes EG:11793),ATMIN,ATOX1,ATP5B,AXL,BAG6,BAHD1,BCLAF1,BCR,BMP1,BRCA1,BTG2,C11orf9,C19orf50,C1QBP,C1S,C2,C3,C6orf1,CA2,CALCOC…	621
Infectious Disease	infection	infection by Retroviridae	3.60E-16	Decreased	-3.865	AASS,ABI2,ABTB1,ACACB,ACADSB,ACHE,ACOT12,ADAM10,ADAMTS5,ADRBK1,AEBP2,AFG3L1,AFG3L2,AGAP2,AGBL5,AHCTF1,AKAP6,ALDH18A1,ALDH1A1,ALDH2,ALDH5A1,ALKBH3,ALKBH8,ALOX12,ALOX5,AMDHD2,AMY2A,ANKRD43,ANKRD6,ANKRD9,AP1G2,AP2M1,APOBEC3B,AQPEP,AQR,AR,ARGLU1,ARHGAP18,ARHGAP32,ARHGEF19,ARID1A,ARID5A,ARNT2,ARPC1A,ASXL2,ATG12 (includes EG:361321),ATG16L2,ATMIN,ATOX1,ATP5A1,ATP5B,ATP6V0A4,ATR,AXL,B3GNT3,BAG6,BAHD1,BC…	740
Gene Expression	transactivation	transactivation	4.39E-16		-0.170	ABTB1,ACACB,ACVR1,ACVR1B,ACVR2A,ACVR2B,ADAMTS5,AFAP1L2,AGT,AHR,ALOXE3,APBA1,APBB1,APP,APPL1,AR,ARID1A,ARNT,ASCC1,ASXL1,ATF1 (includes EG:100040260),ATF2,ATOX1,AXIN1,BCL6,BCR,BDNF,BEX2,BMP2,BRCA1,BSX,BTRC,C19orf2,CAMK1D,CARM1,CBY1,CCND1,CCND2,CCND3,CCNH,CCNT1,CCT2,CD40,CD80 (includes EG:12519),CD86,CDCA4,CDK7,CEP350,CHD4,CHST14,CIAO1,CIITA,CITED2,CREB1,CREBBP,CRIM1,CRTC1,CRTC2,CTNNB1,CTNNBIP1,CXAD…	377
Cellular Growth and Proliferation	growth	growth of tumor cell lines	6.55E-16		-0.742	A2M,ABCB1,ABCB5,ABL1,ABTB1,ACIN1,ACPP,ACSL5,ACTN4,ACVR2A,ADAM17,ADAMTS15,ADM,AFF1,AGT,AHSA1,AHSG,AKAP12,AKIRIN2,AKT1S1,AKT2,AKT3 (includes EG:10000),ALDH1A1,AMH,ANTXR1,ANXA7,APC,AR,ARHGEF2,ARL11,ARRDC3,ATF3,ATF5,ATG5 (includes EG:11793),ATR,AURKA,AXIN1,BAD,BCAR1,BCCIP,BCL10,BCL2L1,BCL6,BCR,BIRC5,BMI1,BMP2,BMP4,BMP6,BMX,BNIP3,BNIPL,BRAF,BRCA1,BRK1,BTC,BTG2,C19orf2,C9,C9orf86,CA3,CA9,CALR,CAMK2N2,C…	574
Cellular Development	growth	growth of tumor cell lines	6.55E-16		-0.742	A2M,ABCB1,ABCB5,ABL1,ABTB1,ACIN1,ACPP,ACSL5,ACTN4,ACVR2A,ADAM17,ADAMTS15,ADM,AFF1,AGT,AHSA1,AHSG,AKAP12,AKIRIN2,AKT1S1,AKT2,AKT3 (includes EG:10000),ALDH1A1,AMH,ANTXR1,ANXA7,APC,AR,ARHGEF2,ARL11,ARRDC3,ATF3,ATF5,ATG5 (includes EG:11793),ATR,AURKA,AXIN1,BAD,BCAR1,BCCIP,BCL10,BCL2L1,BCL6,BCR,BIRC5,BMI1,BMP2,BMP4,BMP6,BMX,BNIP3,BNIPL,BRAF,BRCA1,BRK1,BTC,BTG2,C19orf2,C9,C9orf86,CA3,CA9,CALR,CAMK2N2,C…	574
Infectious Disease	HIV infection	HIV infection	8.40E-16	Decreased	-3.640	AASS,ABI2,ABTB1,ACACB,ACADSB,ACHE,ACOT12,ADAM10,ADAMTS5,ADRBK1,AEBP2,AFG3L1,AFG3L2,AGAP2,AGBL5,AHCTF1,AKAP6,ALDH18A1,ALDH1A1,ALDH2,ALDH5A1,ALKBH3,ALKBH8,ALOX12,ALOX5,AMDHD2,AMY2A,ANKRD43,ANKRD6,ANKRD9,AP1G2,AP2M1,AQPEP,AQR,AR,ARGLU1,ARHGAP18,ARHGAP32,ARHGEF19,ARID1A,ARID5A,ARNT2,ARPC1A,ASXL2,ATG12 (includes EG:361321),ATG16L2,ATMIN,ATOX1,ATP5A1,ATP5B,ATP6V0A4,ATR,B3GNT3,BAG6,BAHD1,BCLAF1,BCR,BMP1…	733
Infectious Disease	infection	infection by lentivirus	1.26E-15	Decreased	-3.657	AASS,ABI2,ABTB1,ACACB,ACADSB,ACHE,ACOT12,ADAM10,ADAMTS5,ADRBK1,AEBP2,AFG3L1,AFG3L2,AGAP2,AGBL5,AHCTF1,AKAP6,ALDH18A1,ALDH1A1,ALDH2,ALDH5A1,ALKBH3,ALKBH8,ALOX12,ALOX5,AMDHD2,AMY2A,ANKRD43,ANKRD6,ANKRD9,AP1G2,AP2M1,AQPEP,AQR,AR,ARGLU1,ARHGAP18,ARHGAP32,ARHGEF19,ARID1A,ARID5A,ARNT2,ARPC1A,ASXL2,ATG12 (includes EG:361321),ATG16L2,ATMIN,ATOX1,ATP5A1,ATP5B,ATP6V0A4,ATR,B3GNT3,BAG6,BAHD1,BCLAF1,BCR,BMP1…	734
Post-Translational Modification	ubiquitination	ubiquitination	1.54E-15		-1.351	AMFR,ANAPC10,ANAPC4,ANAPC5,ANGPT1,ARIH1,ARIH2,ARRB1,ARRB2,ATG3 (includes EG:171415),ATG5 (includes EG:11793),AXIN1,BAG5,BCL10,BIRC3,BRAP,BRCA1,BTRC,CAND1,CAPN1,CARD10,CAST,CBL,CBLC,CBLL1,CD40,CD86,CDC23,CDC34,CDK5,CHFR,CNOT4,COMMD1,CUL2,CUL3 (includes EG:26554),CUL5,DAXX,DDB1,DDB2,DNAJA3,DNAJB2,ERCC8,FBXL2,FBXL5,FBXL6,FBXO2,FBXO22,FBXO25,FBXO3,FBXO32,FBXO7,FBXW11,FBXW2,FBXW7,FEM1B,FGFR3,FKBP1A,G2…	188
Cell Cycle	G1 phase	G1 phase	1.71E-15	Decreased	-2.524	ABL1,ACIN1,ACVR1,ACVR1B,ADRA1D,AHR,AKAP12,ALOX15,AMH,APC,APOE,ARNT,ARRB1,ATF3,ATM,BAD,BCAT1,BCL3,BCR,BHLHE40,BIRC5,BLM,BMP2,BMP7,BRAF,BRCA1,BTG2,BTK,BTRC,C11orf82,C9,CAMK1,CAMK2A,CAMK2D,CAMK2G,CAMKK1,CAMKK2,CAPNS1,CASP3,CCND1,CCND2,CCND3,CCNE1,CCNE2,CCNG2,CD180,CD247,CD40,CDC123,CDC23,CDC25A,CDC25B,CDC25C,CDC6 (includes EG:23834),CDCA5,CDK1,CDK2,CDK3,CDK4,CDK5RAP3,CDK6,CDKN1A,CDKN1B,CDKN1C,CDKN2B…	278
Cancer	colon tumor	colon tumor	1.91E-15		0.600	ABCA5,ABCC3,ABCD3,ACLY,ACOT7,ACOX1,ADAMTS1,ADSL,AHCY,AKR1B1,ALB,ANKRD9,ANTXR1,ANXA11,ANXA4,APC,AQP3,AR,ATF3,ATP2A2,AURKA,B4GALT1,BAK1,BCAS1,BMP2,BMP7,BRAF,BRF1 (includes EG:2972),BST2,BYSL,C10orf54,C12orf48,C15orf23,C17orf81,C20orf27,C9orf86,CA2,CACYBP,CAPN5,CAT,CAV1,CCNA2,CCT4,CCT5,CD274,CDC6 (includes EG:23834),CDCA5,CDCA8,CDH1,CDK4,CDK7,CDKN1A,CDKN1B,CDKN3,CEP55,CHAF1A,CIRBP,CLDN1,CLDN2,CLDN3,…	340
Gastrointestinal Disease	colon tumor	colon tumor	1.91E-15		0.600	ABCA5,ABCC3,ABCD3,ACLY,ACOT7,ACOX1,ADAMTS1,ADSL,AHCY,AKR1B1,ALB,ANKRD9,ANTXR1,ANXA11,ANXA4,APC,AQP3,AR,ATF3,ATP2A2,AURKA,B4GALT1,BAK1,BCAS1,BMP2,BMP7,BRAF,BRF1 (includes EG:2972),BST2,BYSL,C10orf54,C12orf48,C15orf23,C17orf81,C20orf27,C9orf86,CA2,CACYBP,CAPN5,CAT,CAV1,CCNA2,CCT4,CCT5,CD274,CDC6 (includes EG:23834),CDCA5,CDCA8,CDH1,CDK4,CDK7,CDKN1A,CDKN1B,CDKN3,CEP55,CHAF1A,CIRBP,CLDN1,CLDN2,CLDN3,…	340
Cellular Growth and Proliferation	proliferation	proliferation of tumor cell lines	2.04E-15	Increased	2.292	A2M,ABCB7,ABL1,ACAT1,ACPP,ACRBP,ACVR1,ACVR1C,ACVR2A,ADAM17,ADC,ADM,ADORA2B,ADRA1B,AFAP1,AFP,AGER,AGK,AGT,AHR,AKT2,AKT3 (includes EG:10000),ALK,AMH,AMOT,ANG,APC,APP,AR,ARG1,ARID4A,ARID4B,ARIH2,ARL2BP,ARRDC3,ASAH1,ATM,AURKA,AURKB,AXL,BAD,BAK1,BARD1,BCAR1,BCL2L1,BCL6,BCR,BDKRB2,BDNF,BEX2,BIRC5,BMI1,BMP2,BMP4,BMP7,BMPR2,BMX,BOP1/LOC727967,BRAF,BRCA1,BRK1,BTC,BUB1 (includes EG:100307076),C14orf169,C1Q…	610
Cell Death	cell death	cell death of fibroblast cell lines	2.23E-15		1.368	ABCB1,ABCC1,ABCC4 (includes EG:10257),ABCE1,ABCG2,ABL1,ABL2,ACTB,AGT,AHR,AIFM1,APP,ARID1A,ARNT,ASAH1,ATF2,ATF3,ATG5 (includes EG:11793),ATM,ATP6AP2,ATP6V1G2,AXIN1,BACH2,BAD,BAK1,BCL2A1,BCL2L1,BECN1,BIRC3,BIRC5,BMF,BMI1,BNIP3,BRCA1,C11orf82,C1orf159,CA3,CALB1,CAMP,CAPNS1,CASP2,CASP3,CASP8,CASP9 (includes EG:100140945),CASZ1,CCND1,CCNE1,CD40,CDC20,CDC73 (includes EG:214498),CDK6,CDKN1A,CDKN1B,CDKN1…	307
Cancer	colon cancer	colon cancer	3.07E-15		0.600	ABCA5,ABCC3,ABCD3,ACLY,ACOT7,ACOX1,ADAMTS1,ADSL,AHCY,ALB,ANKRD9,ANTXR1,ANXA11,ANXA4,APC,AQP3,AR,ATF3,ATP2A2,B4GALT1,BAK1,BCAS1,BMP2,BMP7,BRAF,BST2,BYSL,C10orf54,C12orf48,C15orf23,C17orf81,C20orf27,C9orf86,CA2,CACYBP,CAPN5,CAT,CAV1,CCNA2,CCT4,CCT5,CD274,CDC6 (includes EG:23834),CDCA5,CDCA8,CDH1,CDK4,CDK7,CDKN1A,CDKN1B,CDKN3,CEP55,CHAF1A,CIRBP,CLDN1,CLDN2,CLDN3,CLDN4,CLIC5,CLSTN1,CLU,CNNM2,CNNM4,CO…	335
Gastrointestinal Disease	colon cancer	colon cancer	3.07E-15		0.600	ABCA5,ABCC3,ABCD3,ACLY,ACOT7,ACOX1,ADAMTS1,ADSL,AHCY,ALB,ANKRD9,ANTXR1,ANXA11,ANXA4,APC,AQP3,AR,ATF3,ATP2A2,B4GALT1,BAK1,BCAS1,BMP2,BMP7,BRAF,BST2,BYSL,C10orf54,C12orf48,C15orf23,C17orf81,C20orf27,C9orf86,CA2,CACYBP,CAPN5,CAT,CAV1,CCNA2,CCT4,CCT5,CD274,CDC6 (includes EG:23834),CDCA5,CDCA8,CDH1,CDK4,CDK7,CDKN1A,CDKN1B,CDKN3,CEP55,CHAF1A,CIRBP,CLDN1,CLDN2,CLDN3,CLDN4,CLIC5,CLSTN1,CLU,CNNM2,CNNM4,CO…	335
Genetic Disorder	colon cancer	colon cancer	3.07E-15		0.600	ABCA5,ABCC3,ABCD3,ACLY,ACOT7,ACOX1,ADAMTS1,ADSL,AHCY,ALB,ANKRD9,ANTXR1,ANXA11,ANXA4,APC,AQP3,AR,ATF3,ATP2A2,B4GALT1,BAK1,BCAS1,BMP2,BMP7,BRAF,BST2,BYSL,C10orf54,C12orf48,C15orf23,C17orf81,C20orf27,C9orf86,CA2,CACYBP,CAPN5,CAT,CAV1,CCNA2,CCT4,CCT5,CD274,CDC6 (includes EG:23834),CDCA5,CDCA8,CDH1,CDK4,CDK7,CDKN1A,CDKN1B,CDKN3,CEP55,CHAF1A,CIRBP,CLDN1,CLDN2,CLDN3,CLDN4,CLIC5,CLSTN1,CLU,CNNM2,CNNM4,CO…	335
Cancer	hematological neoplasia	hematological neoplasia	4.81E-15		-1.008	ABCA7,ABCB1,ABCC1,ABCG2,ABL1,ACHE,ADA,ADAM9,ADORA2A,ADORA2B,AIMP1,AKAP5,AKT2,AKT3 (includes EG:10000),ALAD,ALDH5A1,ALK,ALOX12B,ALOX5,AMY2A,ANXA11,ANXA4,ANXA6,APBA1,APBA3,ARHGAP1,ARHGAP26,ARL11,ASXL1,ATM,ATP2B2,ATRN,AURKA,AURKB,AXL,BAALC,BAK1,BCAT1,BCL10,BCL2L1,BCL3,BCL6,BCLAF1,BCR,BIRC5,BLNK,BMI1,BRAF,BRCA1,BRD2,BTG1,BTG2,C12orf5,C5,CARD11,CARD9,CASP3,CASP7,CASP8,CAV1,CBFB,CBL,CBX2,CCND1,CCND3,CC…	579
Hematological Disease	hematological neoplasia	hematological neoplasia	4.81E-15		-1.008	ABCA7,ABCB1,ABCC1,ABCG2,ABL1,ACHE,ADA,ADAM9,ADORA2A,ADORA2B,AIMP1,AKAP5,AKT2,AKT3 (includes EG:10000),ALAD,ALDH5A1,ALK,ALOX12B,ALOX5,AMY2A,ANXA11,ANXA4,ANXA6,APBA1,APBA3,ARHGAP1,ARHGAP26,ARL11,ASXL1,ATM,ATP2B2,ATRN,AURKA,AURKB,AXL,BAALC,BAK1,BCAT1,BCL10,BCL2L1,BCL3,BCL6,BCLAF1,BCR,BIRC5,BLNK,BMI1,BRAF,BRCA1,BRD2,BTG1,BTG2,C12orf5,C5,CARD11,CARD9,CASP3,CASP7,CASP8,CAV1,CBFB,CBL,CBX2,CCND1,CCND3,CC…	579
Cardiovascular System Development and Function	development	development of blood vessel	4.91E-15		1.587	ACVR1,ADA,ADAM15,ADAM9,ADAMTS1,ADAMTS8,ADD1,ADM,ADM2,ADORA2A,ADORA2B,ADRA2A,ADRA2B,AGGF1,AGT,AHR,AIMP1,ALCAM,ALOX12,AMOT,ANG,ANGPT1,ANGPT2,ANGPT4,ANGPTL1,ANGPTL3,ANGPTL4,ANPEP,ANXA3,APC,APOA1,APOE,APOH,AQP1,ARG1,ARHGAP24,ARNT,ATF3,ATP5A1,ATP7A,ATPIF1,AXL,B4GALT1,BDKRB2,BDNF,BIRC5,BMP2,BMP4,BMP6,BMPR1A,BMPR2,BMX,BRAF,BTG1,C3,C3AR1,C5,CALR,CAMP,CASP3,CAV1,CAV2,CBL,CBS,CBX2,CCL28,CCL5,CCM2,CD36,CD3E…	438
Organismal Development	development	development of blood vessel	4.91E-15		1.587	ACVR1,ADA,ADAM15,ADAM9,ADAMTS1,ADAMTS8,ADD1,ADM,ADM2,ADORA2A,ADORA2B,ADRA2A,ADRA2B,AGGF1,AGT,AHR,AIMP1,ALCAM,ALOX12,AMOT,ANG,ANGPT1,ANGPT2,ANGPT4,ANGPTL1,ANGPTL3,ANGPTL4,ANPEP,ANXA3,APC,APOA1,APOE,APOH,AQP1,ARG1,ARHGAP24,ARNT,ATF3,ATP5A1,ATP7A,ATPIF1,AXL,B4GALT1,BDKRB2,BDNF,BIRC5,BMP2,BMP4,BMP6,BMPR1A,BMPR2,BMX,BRAF,BTG1,C3,C3AR1,C5,CALR,CAMP,CASP3,CAV1,CAV2,CBL,CBS,CBX2,CCL28,CCL5,CCM2,CD36,CD3E…	438
Organismal Development	development	development of vessel	5.14E-15		1.561	ACVR1,ADA,ADAM15,ADAM9,ADAMTS1,ADAMTS8,ADD1,ADM,ADM2,ADORA2A,ADORA2B,ADRA2A,ADRA2B,AGGF1,AGT,AHR,AIMP1,ALCAM,ALOX12,AMOT,ANG,ANGPT1,ANGPT2,ANGPT4,ANGPTL1,ANGPTL3,ANGPTL4,ANPEP,ANXA3,APC,APOA1,APOE,APOH,AQP1,ARG1,ARHGAP24,ARNT,ATF3,ATP5A1,ATP7A,ATPIF1,AXL,B4GALT1,BDKRB2,BDNF,BIRC5,BMP2,BMP4,BMP6,BMPR1A,BMPR2,BMX,BRAF,BTG1,C3,C3AR1,C5,CALR,CAMP,CASP3,CAV1,CAV2,CBL,CBS,CBX2,CCL28,CCL5,CCM2,CD36,CD3E…	441
Cell Cycle	interphase	arrest in interphase	5.70E-15			ABL1,ACIN1,ADRA1D,AGK,AKAP12,ALOX15,AMH,AR,ARG1,ARNT,ATF2,ATF5,ATM,ATR,AURKA,BCL2L1,BCR,BHLHE40,BIRC5,BLM,BMI1,BMP2,BMP4,BMP7,BRAF,BRCA1,BRSK2,BTG1,BTG2,BTRC,C11orf82,CAMK1,CAMKK1,CAMKK2,CASP3,CAV1,CCNA2,CCND1,CCND2,CCND3,CCNE1,CD247,CD40,CDC25A,CDC25B,CDC25C,CDC6 (includes EG:23834),CDC7 (includes EG:12545),CDH13,CDK1,CDK2,CDK4,CDK5RAP3,CDKN1A,CDKN1B,CDKN1C,CDKN2B,CDKN2D,CEBPD,CHEK1,CHEK2,CHKA,C…	276
Cell Death	cell death	cell death of fibroblasts	6.81E-15		-1.025	ABL1,ABL2,AGER,AIFM1,AKT2,APP,ARR3 (includes EG:170735),ARRB2,ATF2,ATF3,ATG5 (includes EG:11793),BAD,BAK1,BCL2L1,BECN1,BIRC3,BLM,BMP2,BMP4,BRCA1,BUB1 (includes EG:100307076),C11orf82,CABLES2,CAMP,CAPNS1,CASP2,CASP3,CASP4,CASP7,CASP8,CASP9 (includes EG:100140945),CCND1,CD40,CDH1,CDKN1A,CDKN1B,CFLAR,CHUK,CLIC4,CTBP1,CTBP2,CYCS,Cyct,CYP1B1,DAPK1,DAXX,DDIT3,DDX58,DHCR24,DIABLO,DUSP1,E2F1,EGFR,EIF2AK2…	174
Carbohydrate Metabolism	metabolism	metabolism of carbohydrate	8.20E-15		1.678	ABCB1,ABCC8,ABHD5,ACADM,Acan,ADORA2A,ADORA2B,ADRA1B,ADRB1,ADRB2,ADRBK1,ADRBK2,AGK,AGL,AGPAT1,AGPAT2,AGPAT6,AKR1A1,AKR1B1,AKT2,ALDH2,ALDH5A1,ALDOA,ALDOC,ALG2,AMY2A,ANGPT1,ANGPTL3,AOAH,APOA1,APOA2,APOA4,APOE,ASPN,B3GALNT1,B3GALNT2,B3GALT2,B3GALT6,B3GAT2,B3GAT3,B4GALNT1,B4GALNT2,B4GALT1,BAD,BDNF,C10orf125,C1QL3,C1QTNF2,C5,CACNA1A,CCND3,CD36,CD40,CDIPT,CEPT1,CERS5,CHKA,CHKB,CHPT1,CHRM1,CHST1,CHST11,C…	404
DNA Replication, Recombination, and Repair	repair	repair of DNA	1.00E-14	Decreased	-3.469	ALKBH2,ALKBH3,APBB1,APLF,APTX,ASF1A,ATM,ATR,ATXN3,BABAM1,BAZ1B,BCL2L1,BLM,BMI1,BRCA1,BRCC3,BRE,BTG2,C9orf80,CDCA5,CDK2,CDK2AP1,CDKN1A,CDKN2D,CEBPG,CETN2,CHD1L,CHEK1,CHEK2,CIB1,CSNK1D,DCLRE1A,DCLRE1B,DCLRE1C,DDB1,DDB2,DDX1,DEK,DNA2,E2F1,ENDOV,ERCC1,ERCC2,ERCC3,ERCC5,ERCC6,ERCC8,EXO1 (includes EG:26909),EYA1,FAM175A,FANCC,FBXO6,FEN1,FGF2,FOS,FTO,FUS,GADD45A,GADD45G,H2AFX,HGF,HINFP,HMGA1,HMGB2,HMOX1…	173
Cellular Movement	migration	migration of tumor cell lines	2.31E-14	Increased	2.407	A2M,ADAM10,ADAM15,ADAM17,AFAP1,AGK,AGT,AKT2,AKT3 (includes EG:10000),ALOX12,ANGPT2,ANKRD28,ANKS1A,ANPEP,AP2M1,APC,APP,AR,ARHGDIB,ARHGEF4,ARRB1,ARRB2,ARRDC3,AURKA,AXL,B3GNT1,BCAR1,BCL10,BMP6,BRK1,C1QBP,C5,C5orf13,CAMP,CAPN2,CARD10,CAT,CAV1,CCDC88A,CCL17,CCL20,CCL22,CCL5,CD151,CD36,CD40,CD47,CD97,CDC25B,CDH1,CDH2,CDK5,CDK7,CDKN1B,CLDN4,CLDN7,CLU,COL4A3,CRK,CRMP1,CSE1L,CSF2,CSF2RB,CSK,CST6 (includes…	343
DNA Replication, Recombination, and Repair	metabolism	metabolism of DNA	2.67E-14		-0.843	ABCB1,ABCB6,ABL1,ACHE,ACIN1,ADM,ADRA1D,ADRA2A,ADRB1,AIFM1,AKAP8L,AKT3 (includes EG:10000),ALOX5,ANGPT1,ANTXR1,ANXA3,AP1AR,APC,APP,ASAH1,ATF1 (includes EG:100040260),ATM,ATR,BAK1,BARD1,BCL2L1,BCR,BIRC5,BIRC7,BMX,BNIP3,BRCA1,BTC,C10orf2,CACYBP,CALCB,CALR,CAMP,CASP2,CASP3,CASP9 (includes EG:100140945),CAST,CAV1,CCDC88A,CCNA2,CCNE1,CCNE2,CD40,CDC25A,CDC6 (includes EG:23834),CDC7 (includes EG:12545),C…	285
Cellular Compromise	oxidative stress response	oxidative stress response	2.76E-14		0.870	ABCC1,ADRBK1,AGT,AHR,ALDH1A1,ALDH3A2,ALOX12,ALS2,ANGPTL7,APOE,APP,ATOX1,ATRN,BAK1,BRCA1,CA3,CAMK2G,CAT,COQ7,CST3,CYBB,CYCS,CYGB,DUSP1,EPAS1,ERCC1,ERCC2,ERCC3,ERCC6,ERCC8,ETFDH,FGF8,G6PD,GAB1,GCLC,GCLM,GGT5,GPX7,GSS,HFE,HMOX1,HNF1A,HSD17B10,HSPB2,IDH1,INSR,IPCEF1,JAK2,LDLR,LIAS,LRRK2,MAOB,MAP2K1,MAPK14,Mapt,MMP2,MMP9,MSRA,MT-ND3,MT1E,MT2A,MTF1 (includes EG:17764),MUC1,MUTYH,MYC,NAMPT,NAPRT1,NDUFA6…	123
Cancer	mammary tumor	mammary tumor	2.83E-14		0.090	AACS,ABCB1,ABCC4 (includes EG:10257),ABCG2,ABL1,ACOT9,ADA,ADRA1B,ADRA1D,ADRA2A,ADRA2B,ADRB1,ADRB2,AGPAT2,AGPAT6,AGPAT9,AGR2,AKT2,AKT3 (includes EG:10000),ALB,ALDH1A1,ALDOA,ALOX15,ANG,ANXA9,AP3M2,APC,APOA1,APOE,AR,ARAF,ARFGEF1,ARHGAP19,ARHGDIB,ARHGEF2,ARNTL,ARRDC3,ASH2L,ATF2,ATF3,ATM,ATP2B2,ATP2C2,ATP5C1,AURKA,AURKB,BAD,BAG4,BARD1,BCAM,BCAR1,BCL2A1,BCL2L2,BCR,BECN1,BEX2,BHLHE40,BIRC5,BLVRA,BMI1,BM…	723
Post-Translational Modification	ubiquitination	ubiquitination of protein	3.20E-14		-1.364	AMFR,ANAPC10,ANAPC4,ANAPC5,ANGPT1,ARIH1,ARIH2,ARRB1,ARRB2,ATG3 (includes EG:171415),ATG5 (includes EG:11793),AXIN1,BAG5,BCL10,BIRC3,BRAP,BRCA1,BTRC,CAND1,CAPN1,CARD10,CAST,CBL,CBLC,CBLL1,CD40,CDC23,CDC34,CDK5,CHFR,CNOT4,COMMD1,CUL2,CUL3 (includes EG:26554),CUL5,DAXX,DDB1,DDB2,DNAJA3,DNAJB2,ERCC8,FBXL2,FBXL5,FBXL6,FBXO2,FBXO22,FBXO25,FBXO3,FBXO32,FBXO7,FBXW11,FBXW2,FBXW7,FEM1B,FGFR3,FKBP1A,G2E3,GC…	180
Hematological System Development and Function	hematopoiesis	hematopoiesis	3.28E-14	Increased	3.574	ABCB7,ABL1,ACHE,ACVR1B,ACVR2A,ADA,ADAM10,ADAM17,ADAR,ADD1,ADD2,ADM,AFF1,AGER,AHCTF1,AHR,AHSP,AKT2,ALAS2,ANGPT1,AP3B1,AP3D1,APC,APP,ATM,ATP7A,AXL,B4GALNT1,BAD,BCHE,BCL2A1,BCL2L1,BCL3,BCL6,BCR,BIRC5,BLM,BLNK,BMI1,BMP2,BMP4,BMPR1A,BRCA1,BST1 (includes EG:12182),BTK,C1QC,CALCB,CAMP,CARD11,CASP8,CBFA2T3,CBFB,CBL,CCL25,CCND3,CCR7,CD163,CD244,CD247,CD274,CD3D,CD3E,CD3G,CD4,CD40,CD47,CD80 (includes EG:12…	525
Hematopoiesis	hematopoiesis	hematopoiesis	3.28E-14	Increased	3.574	ABCB7,ABL1,ACHE,ACVR1B,ACVR2A,ADA,ADAM10,ADAM17,ADAR,ADD1,ADD2,ADM,AFF1,AGER,AHCTF1,AHR,AHSP,AKT2,ALAS2,ANGPT1,AP3B1,AP3D1,APC,APP,ATM,ATP7A,AXL,B4GALNT1,BAD,BCHE,BCL2A1,BCL2L1,BCL3,BCL6,BCR,BIRC5,BLM,BLNK,BMI1,BMP2,BMP4,BMPR1A,BRCA1,BST1 (includes EG:12182),BTK,C1QC,CALCB,CAMP,CARD11,CASP8,CBFA2T3,CBFB,CBL,CCL25,CCND3,CCR7,CD163,CD244,CD247,CD274,CD3D,CD3E,CD3G,CD4,CD40,CD47,CD80 (includes EG:12…	525
Cell Death	apoptosis	apoptosis of fibroblast cell lines	3.41E-14		1.290	ABCB1,ABCE1,ABL1,ABL2,AGT,AHR,AIFM1,APP,ASAH1,ATF2,ATF3,ATG5 (includes EG:11793),ATM,ATP6AP2,ATP6V1G2,AXIN1,BACH2,BAD,BAK1,BCL2A1,BCL2L1,BECN1,BIRC3,BMI1,BNIP3,BRCA1,C11orf82,CA3,CALB1,CAMP,CAPNS1,CASP2,CASP3,CASP8,CASP9 (includes EG:100140945),CASZ1,CCNE1,CD40,CDC20,CDC73 (includes EG:214498),CDKN1A,CDKN1B,CDKN1C,CFLAR,CLIC4,COX5A (includes EG:12858),CREBL2,CSF1R,CTNNB1,CUL7,CWC15 (includes EG:3…	231
Cell Cycle	mitosis	mitosis	5.35E-14		0.946	ACRBP,ADM,ADORA2B,AFAP1L2,AGT,AHR,AHSG,AKAP8,ANAPC4,ANKS1A,ANLN,APC,APOE,AR,ARRB1,ATM,ATR,AURKA,AURKB,AXL,BIRC5,BMP2,BMP4,BMP6,BMP7,BORA,BRAF,BRCA1,BTC,BTG3,BUB1 (includes EG:100307076),BUB1B,C12orf11,C5,CBL,CCNA2,CCNB1IP1,CCND1,CCNE1,CD40,CDC123,CDC16,CDC20,CDC23,CDC25A,CDC25B,CDC25C,CDC7 (includes EG:12545),CDCA5,CDCA8,CDK1,CDK13,CDK19,CDK2,CDKN1A,CDKN1B,CENPF,CENPH,CENPI,CHEK1,CHEK2,CHFR,CIT,C…	293
Cellular Movement	cell movement	cell movement of tumor cell lines	7.03E-14	Increased	2.602	A2M,ABL1,ADAM10,ADAM15,ADAM17,ADAM9,AFAP1,AGK,AGR2,AGT,AKT2,AKT3 (includes EG:10000),ALOX12,ANGPT2,ANKRD28,ANKS1A,ANPEP,AP2M1,APC,APP,AR,ARHGAP35,ARHGDIB,ARHGEF4,ARRB1,ARRB2,ARRDC3,AURKA,AXL,B3GNT1,BCAN,BCAR1,BCL10,BCR,BMP6,BMP7,BRK1,C1QBP,C3,C5,C5orf13,CALR,CAMP,CAPN1,CAPN2,CARD10,CAT,CAV1,CCDC88A,CCL16,CCL17,CCL20,CCL22,CCL25,CCL5,CCR8,CCRL1,CD151,CD36,CD40,CD47,CD9,CD97,CDC25B,CDH1,CDH13,CDH2,…	440
Tissue Development	development	development of connective tissue	1.36E-13		-0.457	Acan,ACD,ACHE,ACP2,ACP5,ACVR1,ACVR2A,ACVR2B,ADAMTS1,ADAMTS4,ADAR,ADK,ADM,ADRB2,AGER,AHSG,AKT2,ALDH1A1,ALOX15,ALPL,ANKH,ANKRD11,APC,ARSB,ARSE,ASPN,ATF4,ATP6V0A4,ATP6V1B1,ATP7A,AXL,B4GALNT1,BCHE,BCL6,BGLAP,BGN,BMI1,BMP1,BMP2,BMP3,BMP4,BMP6,BMP7,BMPR1A,BMPR1B,BMPR2,C10orf58,C3,C3AR1,C5,CA2,CALB1,CALCB,CAPNS1,CARM1,CASP3,CAV1,CBFB,CBS,CBX2,CCL5,CCM2,CCND1,CD276,CD40,CD47,CD9,CDK13,CHD7,CHRD,CHST11,CH…	476
Cellular Assembly and Organization	organization	microtubule dynamics	1.59E-13		0.308	A2M,AATK,ABCC1,ABL1,ABL2,ACTN2,ACTR3,ADNP,AGER,AGT,AKAP5,AKAP9,ANGPT2,AP1G1,APC,APOE,APP,AQP1,AR,ARAP1,ARFIP2,ARHGAP24,ARHGAP44,ARHGEF2,ARHGEF4,ARL2,ARPC2,ATF3,ATP2B1,ATP2C1,AXIN1,AXL,B3GNT1,B9D2,BACE1,BAG4,BAIAP2,BBS10,BBS4,BBS5,BCAR1,BDNF,BIRC5,BST2,C1QA,C1QBP,CAMSAP3,CAPG,CAPZB,CAST,CAV1,CAV3,CBL,CBY1,CCDC88A,CCR7,CD9,CDC25B,CDC42BPA,CDH1,CDH13,CDH2,CDH4,CDK2AP2,CDK5,CDK5R1,CDK5RAP2,CDK5RAP3,C…	410
Cellular Function and Maintenance	organization	microtubule dynamics	1.59E-13		0.308	A2M,AATK,ABCC1,ABL1,ABL2,ACTN2,ACTR3,ADNP,AGER,AGT,AKAP5,AKAP9,ANGPT2,AP1G1,APC,APOE,APP,AQP1,AR,ARAP1,ARFIP2,ARHGAP24,ARHGAP44,ARHGEF2,ARHGEF4,ARL2,ARPC2,ATF3,ATP2B1,ATP2C1,AXIN1,AXL,B3GNT1,B9D2,BACE1,BAG4,BAIAP2,BBS10,BBS4,BBS5,BCAR1,BDNF,BIRC5,BST2,C1QA,C1QBP,CAMSAP3,CAPG,CAPZB,CAST,CAV1,CAV3,CBL,CBY1,CCDC88A,CCR7,CD9,CDC25B,CDC42BPA,CDH1,CDH13,CDH2,CDH4,CDK2AP2,CDK5,CDK5R1,CDK5RAP2,CDK5RAP3,C…	410
Tissue Morphology	quantity	quantity of cells	2.13E-13	Increased	2.546	ABCA1,ABCG2,ABL1,ACAT1,ACHE,ACTN4,ACVR1C,ACVR2A,ADA,ADAMTS1,ADD2,ADNP,ADORA2A,ADRB1,AFF1,AGER,AGT,AHR,AHSP,AIFM3,ALK,ALOX5,AMBP,AMH,ANGPT2,ANK2,AP3B1,APLP2,APOA1,APOE,APP,AR,ARHGAP1,ARL4A,ARNT,ARNTL,ATF2,ATF3,ATF4,ATG5 (includes EG:11793),ATM,ATOH7,ATRX,B4GALNT1,BAD,BAK1,BCL10,BCL2A1,BCL2L1,BCL2L2,BCL6,BCR,BDNF,BECN1,BGN,BHLHE40,BIRC5,BLM,BLNK,BMF,BMI1,BMP2,BMP4,BMP6,BMP7,BMPR1A,BMPR1B,BRCA1,BST1…	807
Cancer	hematologic cancer	hematologic cancer	2.56E-13		-0.444	ABCB1,ABCC1,ABCG2,ABL1,ACHE,ADA,ADAM9,ADORA2A,ADORA2B,AKAP5,AKT2,AKT3 (includes EG:10000),ALAD,ALDH5A1,ALOX12B,ALOX5,AMY2A,ANXA11,ANXA4,ANXA6,APBA1,APBA3,ARHGAP1,ARHGAP26,ARL11,ASXL1,ATM,ATP2B2,ATRN,AURKA,AURKB,AXL,BAALC,BAK1,BCAT1,BCL2L1,BCL3,BCL6,BCLAF1,BCR,BLNK,BRAF,C12orf5,C5,CASP7,CASP8,CAV1,CBFB,CBL,CBX2,CCND1,CCNDBP1,CD14,CD1A,CD247,CD27,CD274,CD3D,CD3E,CD3G,CD40,CD55,CD59 (includes EG:254…	444
Hematological Disease	hematologic cancer	hematologic cancer	2.56E-13		-0.444	ABCB1,ABCC1,ABCG2,ABL1,ACHE,ADA,ADAM9,ADORA2A,ADORA2B,AKAP5,AKT2,AKT3 (includes EG:10000),ALAD,ALDH5A1,ALOX12B,ALOX5,AMY2A,ANXA11,ANXA4,ANXA6,APBA1,APBA3,ARHGAP1,ARHGAP26,ARL11,ASXL1,ATM,ATP2B2,ATRN,AURKA,AURKB,AXL,BAALC,BAK1,BCAT1,BCL2L1,BCL3,BCL6,BCLAF1,BCR,BLNK,BRAF,C12orf5,C5,CASP7,CASP8,CAV1,CBFB,CBL,CBX2,CCND1,CCNDBP1,CD14,CD1A,CD247,CD27,CD274,CD3D,CD3E,CD3G,CD40,CD55,CD59 (includes EG:254…	444
Protein Degradation	degradation	degradation of protein	6.23E-13		0.220	ADAM15,ADAM17,ADAMTS13,ADAMTS20,ADAMTS4,ADAMTS9,ADRM1,AGAP2,AGAP3,AGT,AHSP,ALOX12,ALOX15,ALOX5,AMFR,ANAPC10,ANAPC4,ANAPC5,ANPEP,APC,APOA1,APOA2,APOE,APTX,AQPEP,ARIH1,ARIH2,ARNTL,ASGR2,ATG4A,ATG4B,ATG4C,ATXN3,AURKA,AURKAIP1,AXIN1,AZGP1,BACE1,BAG6,BMP1,BTRC,C1S,C3,C9orf3,CALR,CAPN1,CAPN10,CAPN2,CAPN3,CAPNS1,CASP2,CASP3,CASP4,CASP6,CASP7,CASP8,CASP9 (includes EG:100140945),CAST,CAV1,CBLB,CBLC,CD46,C…	308
Protein Synthesis	degradation	degradation of protein	6.23E-13		0.220	ADAM15,ADAM17,ADAMTS13,ADAMTS20,ADAMTS4,ADAMTS9,ADRM1,AGAP2,AGAP3,AGT,AHSP,ALOX12,ALOX15,ALOX5,AMFR,ANAPC10,ANAPC4,ANAPC5,ANPEP,APC,APOA1,APOA2,APOE,APTX,AQPEP,ARIH1,ARIH2,ARNTL,ASGR2,ATG4A,ATG4B,ATG4C,ATXN3,AURKA,AURKAIP1,AXIN1,AZGP1,BACE1,BAG6,BMP1,BTRC,C1S,C3,C9orf3,CALR,CAPN1,CAPN10,CAPN2,CAPN3,CAPNS1,CASP2,CASP3,CASP4,CASP6,CASP7,CASP8,CASP9 (includes EG:100140945),CAST,CAV1,CBLB,CBLC,CD46,C…	308
Protein Synthesis	metabolism	metabolism of protein	7.55E-13		0.513	ABCA1,ACO1,ADAM15,ADAM17,ADAMTS13,ADAMTS20,ADAMTS4,ADAMTS9,ADRA1B,ADRA1D,ADRM1,AGAP2,AGAP3,AGT,AHSP,ALOX12,ALOX15,ALOX5,AMFR,ANAPC10,ANAPC4,ANAPC5,ANPEP,APC,APOA1,APOA2,APOE,APOM,APP,APTX,AQPEP,ARIH1,ARIH2,ARNTL,ASGR2,ATG4A,ATG4B,ATG4C,ATXN3,AURKA,AURKAIP1,AXIN1,AZGP1,BACE1,BAG2,BAG6,BCL3,BMP1,BTRC,C1S,C3,C9orf3,CALR,CAPN1,CAPN10,CAPN2,CAPN3,CAPNS1,CASP2,CASP3,CASP4,CASP6,CASP7,CASP8,CASP9 (inclu…	464
Cell Death	cell death	cell death of blood cells	8.52E-13		0.551	ABCC4 (includes EG:10257),ABCG1,ABL1,ACAT1,ADA,ADAM17,ADORA2A,ADRB1,AGER,AHSP,AIFM1,AIMP1,AKT2,AKTIP,ANPEP,APOE,APP,ARRB1,ASAH1,ATF3,ATF7,ATG3 (includes EG:171415),ATM,BAD,BAK1,BCL10,BCL2A1,BCL2L1,BCL3,BCL6,BCR,BIRC3,BIRC5,BLM,BLNK,BMF,BMP2,BMP4,BRCA1,BTK,C1QA,C5,CACNB3,CAMP,CASP2,CASP3,CASP4,CASP7,CASP8,CASP9 (includes EG:100140945),CAV1,CBFB,CCL25,CCL5,CCND2,CCR8,CD247,CD27,CD274,CD3E,CD4,CD40,…	411
Infectious Disease	infection	infection of embryonic cell lines	8.93E-13	Decreased	-3.191	ADRBK1,AEBP2,AFG3L2,AHCTF1,ALKBH3,AMDHD2,AP1G2,AQR,ARID1A,ARID5A,ATMIN,AXL,BMP1,BTG2,C11orf9,C19orf50,CALCOCO1,CANT1,CCDC51,CD164,CD4,CDC42EP3,CEP68,CGREF1,CHADL,CHAF1A,CHORDC1,CHRNA7,CHST1,CLIP3,CLTA,CNST,COX6B2,CRYAB,CTBP1,CYBB,DAG1,DAZAP2,DDX23,DHX15,DMXL1,DNAJB2,DNM2,DOCK10,DUSP12,DUSP16,EIF2B5,ENC1,EPAS1,ERCC1,ERCC5,ERI3,ETS2,EXOSC10,FAM59A,FBLIM1,FOXJ2,FXR1,GANAB,GATAD2A,GINS4,GPT2 (include…	237
Organismal Injury and Abnormalities	infection	infection of embryonic cell lines	8.93E-13	Decreased	-3.191	ADRBK1,AEBP2,AFG3L2,AHCTF1,ALKBH3,AMDHD2,AP1G2,AQR,ARID1A,ARID5A,ATMIN,AXL,BMP1,BTG2,C11orf9,C19orf50,CALCOCO1,CANT1,CCDC51,CD164,CD4,CDC42EP3,CEP68,CGREF1,CHADL,CHAF1A,CHORDC1,CHRNA7,CHST1,CLIP3,CLTA,CNST,COX6B2,CRYAB,CTBP1,CYBB,DAG1,DAZAP2,DDX23,DHX15,DMXL1,DNAJB2,DNM2,DOCK10,DUSP12,DUSP16,EIF2B5,ENC1,EPAS1,ERCC1,ERCC5,ERI3,ETS2,EXOSC10,FAM59A,FBLIM1,FOXJ2,FXR1,GANAB,GATAD2A,GINS4,GPT2 (include…	237
Cellular Assembly and Organization	organization	organization of organelle	1.07E-12		-0.427	ABCA1,ABCD3,ABL1,ABL2,Acan,ACP2,ADAMTS14,ADAMTS2,ADNP,AGFG1,AGRN,AKAP9,AKTIP,ALDOA,ALS2,ALS2CL,APC,ARAP1,ARFIP2,ARHGAP17,ARHGAP6,ARHGEF2,ARID1A,ARL1,ARL2,ARSB,ATL1,ATL3,ATP2B2,ATP7A,ATXN7,AVIL,AXIN1,BBS4,BCAR1,BCS1L,BGN,BLM,BLZF1,BNIP1,BOC,BORA,BRCA1,C11orf73,CADPS,CAPZB,CASQ1,CAV1,CAV2,CAV3,CD2AP,CDC25B,CDCA8,CDK2AP2,CDK5RAP2,CENPF,CENPH,CENPV,CEP170,CEP68,CEP72,CFL1,CHAF1A,CHMP5,CHRNB1,CIT,CKAP…	311
Cell Cycle	interphase	interphase of tumor cell lines	1.21E-12		-1.510	ABL1,ACIN1,AGK,AHR,AMH,APC,AR,ARRB1,ATF2,ATF5,ATM,ATR,BAD,BHLHE40,BMP2,BMP7,BRAF,BRCA1,BRSK2,BTG2,BTRC,C9,CAMK1,CAMK2A,CAMKK1,CAMKK2,CASP3,CCNA2,CCND1,CCND2,CCND3,CCNE1,CCNG2,CD40,CDC25A,CDC25B,CDC25C,CDC7 (includes EG:12545),CDH1,CDH13,CDK1,CDK2,CDK4,CDK5RAP3,CDK6,CDKN1A,CDKN1B,CDKN1C,CDKN2B,CEBPD,CHEK1,CHEK2,CHKA,CHRNA7,COPS2,CREG1,CREM,CSE1L,CSF2,CTNNB1,CTNND1,CYP1B1,CYR61,DARS,DAXX,DCN,DDIT3,…	243
Infectious Disease	infection	infection of epithelial cell lines	1.22E-12	Decreased	-3.250	ADRBK1,AEBP2,AFG3L2,AHCTF1,ALKBH3,AMDHD2,AP1G2,AQR,ARID1A,ARID5A,ATMIN,AXL,BMP1,BTG2,C11orf9,C19orf50,CALCOCO1,CANT1,CCDC51,CD164,CD4,CDC42EP3,CEP68,CGREF1,CHADL,CHAF1A,CHORDC1,CHRNA7,CHST1,CLIP3,CLTA,CNST,COX6B2,CRYAB,CTBP1,CYBB,DAZAP2,DDX23,DHX15,DMXL1,DNAJB2,DNM2,DOCK10,DUSP12,DUSP16,EIF2B5,ENC1,EPAS1,ERCC1,ERCC5,ERI3,ETS2,EXOSC10,FAM59A,FBLIM1,FOXJ2,FXR1,GANAB,GATAD2A,GINS4,GPT2 (includes EG:…	236
Dermatological Diseases and Conditions	infection	infection of epithelial cell lines	1.22E-12	Decreased	-3.250	ADRBK1,AEBP2,AFG3L2,AHCTF1,ALKBH3,AMDHD2,AP1G2,AQR,ARID1A,ARID5A,ATMIN,AXL,BMP1,BTG2,C11orf9,C19orf50,CALCOCO1,CANT1,CCDC51,CD164,CD4,CDC42EP3,CEP68,CGREF1,CHADL,CHAF1A,CHORDC1,CHRNA7,CHST1,CLIP3,CLTA,CNST,COX6B2,CRYAB,CTBP1,CYBB,DAZAP2,DDX23,DHX15,DMXL1,DNAJB2,DNM2,DOCK10,DUSP12,DUSP16,EIF2B5,ENC1,EPAS1,ERCC1,ERCC5,ERI3,ETS2,EXOSC10,FAM59A,FBLIM1,FOXJ2,FXR1,GANAB,GATAD2A,GINS4,GPT2 (includes EG:…	236
Cell Death	cell death	cell death of epithelial cells	1.87E-12		-0.226	ABCG2,ADRBK1,AIFM1,AIFM3,ALDH1A1,ALDH3A1,ALOX15,AMH,APC,APP,AR,ATF3,ATG5 (includes EG:11793),ATM,ATP13A2,ATP1A4,ATP2B2,AURKA,BAD,BAG4,BAK1,BCL10,BCL2A1,BCL2L1,BCL6,BECN1,BIRC3,BIRC5,BMP7,BNIP3,BOK,CA3,CALB1,CAMP,CASP2,CASP3,CASP7,CASP8,CASP9 (includes EG:100140945),CAT,CD4,CD40,CDC37,CDH1,CDK6,CDKN1A,CDKN1B,CEBPD,CFLAR,CHMP5,CHUK,CLIC4,CNNM4,COX11,CRYAB,CSF1R,CTSS,CUL7,CYCS,CYP19A1,DAB2,DAP3,DAXX…	269
Lipid Metabolism	synthesis	synthesis of lipid	2.19E-12	Increased	2.771	ABCA1,ABCB1,ABCC1,ABCG1,ABCG5,ABHD5,ACACB,ACADL,ACADVL,ACAT1,ACAT2,ACBD3,ACER3,ACLY,ACSL1,ACSL3,ACSL5,ACSL6,ACSM3,ACSS1,ACSS2,ADH1C (includes EG:11522),ADH5 (includes EG:11532),ADM,ADORA2B,ADRBK1,AGER,AGK,AGPAT1,AGPAT2,AGPAT6,AGPAT9,AGPS,AGT,ALB,ALDH1A1,ALDH8A1,ALG2,ALOX12,ALOX12B,ALOX15,ALOX5,ALOX5AP,AMH,ANG,ANGPT2,APC,APOA1,APOA2,APOA4,APOC2,APOC3,APOE,APP,AR,ARV1 (includes EG:292097),ASAH1,ATP…	441
Small Molecule Biochemistry	synthesis	synthesis of lipid	2.19E-12	Increased	2.771	ABCA1,ABCB1,ABCC1,ABCG1,ABCG5,ABHD5,ACACB,ACADL,ACADVL,ACAT1,ACAT2,ACBD3,ACER3,ACLY,ACSL1,ACSL3,ACSL5,ACSL6,ACSM3,ACSS1,ACSS2,ADH1C (includes EG:11522),ADH5 (includes EG:11532),ADM,ADORA2B,ADRBK1,AGER,AGK,AGPAT1,AGPAT2,AGPAT6,AGPAT9,AGPS,AGT,ALB,ALDH1A1,ALDH8A1,ALG2,ALOX12,ALOX12B,ALOX15,ALOX5,ALOX5AP,AMH,ANG,ANGPT2,APC,APOA1,APOA2,APOA4,APOC2,APOC3,APOE,APP,AR,ARV1 (includes EG:292097),ASAH1,ATP…	441
Cancer	leiomyomatosis	leiomyomatosis	4.15E-12			ABI2,ACTC1,AHR,AK2,AKAP8L,ALDH1A1,ALDOA,ANAPC10,ARFGEF2,ARIH2,ARL4D,ARNT,ARSE,ASB5,ASH2L,ATRN,ATRNL1,AURKB,BCL10,BDH1 (includes EG:100037356),C18orf1,CALCRL,CAPN6,CBL,CD97,CDC7 (includes EG:12545),CETN3,CGRRF1,CLCN5,CLDN11,CLEC16A,CNP,COL4A6,CRABP2,CRY2,CSF1R,CTGF,CTNND1,CTSC,CXCL14,CYBA,CYP19A1,CYP1B1,CYR61,DDX24,DDX6,DNTTIP2,DPT,DR1,DST,DUSP1,DVL1,DYRK2,ECM2 (includes EG:1842),EDNRB,EGFR,EIF4EB…	218
DNA Replication, Recombination, and Repair	replication	DNA replication	4.39E-12		-1.481	ABCB6,ACHE,ADRA2A,AKAP8L,AKT3 (includes EG:10000),AP1AR,APC,ATF1 (includes EG:100040260),ATM,ATR,BRCA1,BTC,C10orf2,CACYBP,CALR,CAV1,CCDC88A,CCNA2,CCNE1,CCNE2,CD40,CDC25A,CDC6 (includes EG:23834),CDC7 (includes EG:12545),CDK1,CDK2,CDK2AP1,CDKN1A,CDKN1B,CDT1,CHEK1,CLU,CSF2,CST3,CTC1,CUL4A,CUL4B,DDB1,DNA2,DNAJA3,DNAJC2,DSCC1,DUT,E2F1,E2F2,E4F1,EPO,ERCC1,ESCO1,ESRRA,FEN1,FGF2,FHIT,FOXM1,FYN,GADD45G,G…	176
DNA Replication, Recombination, and Repair	synthesis	synthesis of DNA	4.92E-12		0.895	A2M,ADA,ADK,ADM,ADORA2A,ADORA2B,ADRA1B,ADRA1D,ADRM1,AGT,AIMP1,ALDH3A1,ALK,Alox12e,ALOX15B,AMH,APOE,APP,AR,ARRB1,ARRB2,ATF1 (includes EG:100040260),ATF3,ATM,ATR,BAD,BCAR1,BCL3,BDNF,BIRC5,BMP2,BMP4,BMP6,BMP7,BMPR1B,BTC,CALCB,CAV1,CCDC88A,CCL5,CCNA2,CCND1,CCNE1,CCNE2,CD180,CD40,CDC25A,CDC25C,CDC7 (includes EG:12545),CDCA4,CDK2,CDK2AP1,CDK6,CDKN1A,CDKN1B,CDKN1C,CDKN2B,CDKN2C,CDKN2D,CDT1,CHEK1,CHEK2,C…	269
Organismal Development	organogenesis	organogenesis	5.25E-12		1.718	AACS,AARS,ABCA1,ABCA3,ABI2,ABL1,ACADM,ACOX1,ACRBP,ACTC1,ACVR1,ACVR1B,ACVR2A,ACVR2B,ADA,ADAM10,ADAM17,ADAM19,ADAMTS1,ADAMTS2,ADM,ADRA1B,ADRA2A,ADRA2B,ADRBK1,AFF4,AGER,AGFG1,AGPAT6,AGT,AGTPBP1,AHR,AHSG,AKT2,AKTIP,ALB,ALDH1A1,ALDH3A2,ALOX12B,ALOX15,AMH,ANGPT1,ANGPT2,ANGPTL3,ANGPTL4,ANKRD1,ANO1,ANXA4,APC,APLP2,APOA1,APP,AQP1,AQP11,AQP5,AR,ARHGAP1,ARHGAP35,ARNT,ARNT2,ARSB,ASAH1,ASB1,ASL,ATF3,ATF7,ATM,…	1112
Embryonic Development	organogenesis	organogenesis	5.25E-12		1.718	AACS,AARS,ABCA1,ABCA3,ABI2,ABL1,ACADM,ACOX1,ACRBP,ACTC1,ACVR1,ACVR1B,ACVR2A,ACVR2B,ADA,ADAM10,ADAM17,ADAM19,ADAMTS1,ADAMTS2,ADM,ADRA1B,ADRA2A,ADRA2B,ADRBK1,AFF4,AGER,AGFG1,AGPAT6,AGT,AGTPBP1,AHR,AHSG,AKT2,AKTIP,ALB,ALDH1A1,ALDH3A2,ALOX12B,ALOX15,AMH,ANGPT1,ANGPT2,ANGPTL3,ANGPTL4,ANKRD1,ANO1,ANXA4,APC,APLP2,APOA1,APP,AQP1,AQP11,AQP5,AR,ARHGAP1,ARHGAP35,ARNT,ARNT2,ARSB,ASAH1,ASB1,ASL,ATF3,ATF7,ATM,…	1112
Organ Development	organogenesis	organogenesis	5.25E-12		1.718	AACS,AARS,ABCA1,ABCA3,ABI2,ABL1,ACADM,ACOX1,ACRBP,ACTC1,ACVR1,ACVR1B,ACVR2A,ACVR2B,ADA,ADAM10,ADAM17,ADAM19,ADAMTS1,ADAMTS2,ADM,ADRA1B,ADRA2A,ADRA2B,ADRBK1,AFF4,AGER,AGFG1,AGPAT6,AGT,AGTPBP1,AHR,AHSG,AKT2,AKTIP,ALB,ALDH1A1,ALDH3A2,ALOX12B,ALOX15,AMH,ANGPT1,ANGPT2,ANGPTL3,ANGPTL4,ANKRD1,ANO1,ANXA4,APC,APLP2,APOA1,APP,AQP1,AQP11,AQP5,AR,ARHGAP1,ARHGAP35,ARNT,ARNT2,ARSB,ASAH1,ASB1,ASL,ATF3,ATF7,ATM,…	1112
Cardiovascular System Development and Function	vasculogenesis	vasculogenesis	5.37E-12		1.868	ACVR1,ADA,ADAM15,ADAM9,ADAMTS1,ADAMTS8,ADM,ADRA2A,ADRA2B,AGGF1,AGT,AHR,AIMP1,ALCAM,ALOX12,AMOT,ANG,ANGPT1,ANGPT2,ANGPTL1,ANGPTL3,ANGPTL4,ANPEP,APC,APOA1,APOE,APOH,ARG1,ARHGAP24,ARNT,ATF3,ATP5A1,ATPIF1,AXL,B4GALT1,BDKRB2,BDNF,BIRC5,BMP2,BMP4,BMP6,BMPR1A,BMPR2,BMX,BRAF,C3,CALR,CAMP,CAV1,CAV2,CBL,CBS,CBX2,CCM2,CD36,CD3E,CD40,CDH13,CDH2,CDH5,CDKN1B,CHD7,CITED2,CLIC4,COL18A1,COL4A1,COL4A2,COL4A3,COMMD…	369
Organismal Development	vasculogenesis	vasculogenesis	5.37E-12		1.868	ACVR1,ADA,ADAM15,ADAM9,ADAMTS1,ADAMTS8,ADM,ADRA2A,ADRA2B,AGGF1,AGT,AHR,AIMP1,ALCAM,ALOX12,AMOT,ANG,ANGPT1,ANGPT2,ANGPTL1,ANGPTL3,ANGPTL4,ANPEP,APC,APOA1,APOE,APOH,ARG1,ARHGAP24,ARNT,ATF3,ATP5A1,ATPIF1,AXL,B4GALT1,BDKRB2,BDNF,BIRC5,BMP2,BMP4,BMP6,BMPR1A,BMPR2,BMX,BRAF,C3,CALR,CAMP,CAV1,CAV2,CBL,CBS,CBX2,CCM2,CD36,CD3E,CD40,CDH13,CDH2,CDH5,CDKN1B,CHD7,CITED2,CLIC4,COL18A1,COL4A1,COL4A2,COL4A3,COMMD…	369
Tissue Development	development	development of organ	6.22E-12		1.800	AACS,AARS,ABCA1,ABCA3,ABI2,ABL1,ACADM,ACOX1,ACRBP,ACTC1,ACVR1,ACVR1B,ACVR2A,ACVR2B,ADA,ADAM10,ADAM17,ADAM19,ADAMTS1,ADAMTS2,ADM,ADRA1B,ADRA2A,ADRA2B,ADRBK1,AFF4,AGER,AGFG1,AGPAT6,AGT,AGTPBP1,AHR,AHSG,AKT2,AKTIP,ALB,ALDH1A1,ALDH3A2,ALOX12B,ALOX15,AMH,ANGPT1,ANGPTL3,ANGPTL4,ANKRD1,ANO1,ANXA4,APC,APLP2,APOA1,APP,AQP1,AQP11,AQP5,AR,ARHGAP1,ARHGAP35,ARNT,ARNT2,ARSB,ASAH1,ASB1,ASL,ATF3,ATF7,ATM,ATOH7,A…	1096
Organismal Development	development	development of organ	6.22E-12		1.800	AACS,AARS,ABCA1,ABCA3,ABI2,ABL1,ACADM,ACOX1,ACRBP,ACTC1,ACVR1,ACVR1B,ACVR2A,ACVR2B,ADA,ADAM10,ADAM17,ADAM19,ADAMTS1,ADAMTS2,ADM,ADRA1B,ADRA2A,ADRA2B,ADRBK1,AFF4,AGER,AGFG1,AGPAT6,AGT,AGTPBP1,AHR,AHSG,AKT2,AKTIP,ALB,ALDH1A1,ALDH3A2,ALOX12B,ALOX15,AMH,ANGPT1,ANGPTL3,ANGPTL4,ANKRD1,ANO1,ANXA4,APC,APLP2,APOA1,APP,AQP1,AQP11,AQP5,AR,ARHGAP1,ARHGAP35,ARNT,ARNT2,ARSB,ASAH1,ASB1,ASL,ATF3,ATF7,ATM,ATOH7,A…	1096
Embryonic Development	development	development of organ	6.22E-12		1.800	AACS,AARS,ABCA1,ABCA3,ABI2,ABL1,ACADM,ACOX1,ACRBP,ACTC1,ACVR1,ACVR1B,ACVR2A,ACVR2B,ADA,ADAM10,ADAM17,ADAM19,ADAMTS1,ADAMTS2,ADM,ADRA1B,ADRA2A,ADRA2B,ADRBK1,AFF4,AGER,AGFG1,AGPAT6,AGT,AGTPBP1,AHR,AHSG,AKT2,AKTIP,ALB,ALDH1A1,ALDH3A2,ALOX12B,ALOX15,AMH,ANGPT1,ANGPTL3,ANGPTL4,ANKRD1,ANO1,ANXA4,APC,APLP2,APOA1,APP,AQP1,AQP11,AQP5,AR,ARHGAP1,ARHGAP35,ARNT,ARNT2,ARSB,ASAH1,ASB1,ASL,ATF3,ATF7,ATM,ATOH7,A…	1096
Organ Development	development	development of organ	6.22E-12		1.800	AACS,AARS,ABCA1,ABCA3,ABI2,ABL1,ACADM,ACOX1,ACRBP,ACTC1,ACVR1,ACVR1B,ACVR2A,ACVR2B,ADA,ADAM10,ADAM17,ADAM19,ADAMTS1,ADAMTS2,ADM,ADRA1B,ADRA2A,ADRA2B,ADRBK1,AFF4,AGER,AGFG1,AGPAT6,AGT,AGTPBP1,AHR,AHSG,AKT2,AKTIP,ALB,ALDH1A1,ALDH3A2,ALOX12B,ALOX15,AMH,ANGPT1,ANGPTL3,ANGPTL4,ANKRD1,ANO1,ANXA4,APC,APLP2,APOA1,APP,AQP1,AQP11,AQP5,AR,ARHGAP1,ARHGAP35,ARNT,ARNT2,ARSB,ASAH1,ASB1,ASL,ATF3,ATF7,ATM,ATOH7,A…	1096
Cell Death	cell death	cell death of cervical cancer cell lines	8.37E-12		0.096	ABCB1,ABCB7,ABL1,ACER2,ADRM1,AIFM1,APOPT1,ATG5 (includes EG:11793),ATP2A1,ATP2A2,ATP2B1,BAD,BAK1,BBS4,BCL2A1,BCL2L1,BECN1,BIRC5,BIRC7,BNIP2,BOK,BUB1B,C15orf63,C9orf80,CALR,CAMP,CASP2,CASP3,CASP4,CASP8,CAT,CCND3,CDC20,CDC6 (includes EG:23834),CDC7 (includes EG:12545),CDK1,CDKN1A,CDKN1B,CDKN2C,CHEK1,CHMP5,CHTOP,CIB1,CIDEB,COX5A (includes EG:12858),CSF1R,CSNK2A1,CSNK2A2,CTSB,DAP3,DAPK1,DAXX,DCLRE1B,…	214
Neurological Disease	dyskinesia	dyskinesia	8.74E-12		1.510	A2M,ACADM,ACAT1,ACHE,ACTB,ACTN2,ACTN3,ADCY5,ADCY7,ADORA2A,ADRA1B,ADRA1D,ADRA2A,ADRA2B,ADRB1,ADRB2,AGXT2L1,AHCY,AK1,ALAS1,ALDH2,ALDH6A1,ANKRD11,AP1S1,APOA4,APOD,APOE,AQP1,AQP4,ARHGAP32,ARHGEF1,ARIH2,ARL3,ARMCX2,ARMCX3,ARR3 (includes EG:170735),ATP1A1,ATP1A2,ATP1A4,ATP2A1,ATP2A2,ATP2B1,ATP2B2,ATP5C1,ATP5J,ATP5L,ATP5O,ATP6AP2,ATP6V1A,ATP6V1B2,B3GALT4,B3GNT1,B4GALNT1,B4GALT5,BAIAP2,BANP,BASP1,BBOX1,B…	513
Cancer	breast cancer	breast cancer	1.11E-11		-0.109	AACS,ABCB1,ABCC4 (includes EG:10257),ABCG2,ABL1,ACOT9,ADA,ADRA1B,ADRA1D,ADRA2A,ADRA2B,ADRB1,ADRB2,AGPAT2,AGPAT6,AGPAT9,AGR2,AKT2,AKT3 (includes EG:10000),ALB,ALDH1A1,ALDOA,ALOX15,ANG,ANXA9,AP3M2,APC,APOA1,APOE,AR,ARAF,ARFGEF1,ARHGAP19,ARHGDIB,ARHGEF2,ARNTL,ASH2L,ATF2,ATF3,ATM,ATP2B2,ATP2C2,ATP5C1,AURKA,AURKB,BAD,BAG4,BARD1,BCAM,BCAR1,BCL2A1,BCL2L2,BCR,BECN1,BEX2,BHLHE40,BIRC5,BLVRA,BMI1,BMP7,BNIP…	673
Reproductive System Disease	breast cancer	breast cancer	1.11E-11		-0.109	AACS,ABCB1,ABCC4 (includes EG:10257),ABCG2,ABL1,ACOT9,ADA,ADRA1B,ADRA1D,ADRA2A,ADRA2B,ADRB1,ADRB2,AGPAT2,AGPAT6,AGPAT9,AGR2,AKT2,AKT3 (includes EG:10000),ALB,ALDH1A1,ALDOA,ALOX15,ANG,ANXA9,AP3M2,APC,APOA1,APOE,AR,ARAF,ARFGEF1,ARHGAP19,ARHGDIB,ARHGEF2,ARNTL,ASH2L,ATF2,ATF3,ATM,ATP2B2,ATP2C2,ATP5C1,AURKA,AURKB,BAD,BAG4,BARD1,BCAM,BCAR1,BCL2A1,BCL2L2,BCR,BECN1,BEX2,BHLHE40,BIRC5,BLVRA,BMI1,BMP7,BNIP…	673
Infectious Disease	infection	infection of kidney cell lines	1.15E-11	Decreased	-3.183	ADRBK1,AEBP2,AFG3L2,AHCTF1,ALKBH3,AMDHD2,AP1G2,AQR,ARID1A,ARID5A,ATMIN,AXL,BMP1,BTG2,C11orf9,C19orf50,CALCOCO1,CANT1,CCDC51,CCL5,CD164,CD4,CDC42EP3,CEP68,CGREF1,CHADL,CHAF1A,CHORDC1,CHRNA7,CHST1,CLIP3,CLTA,CNST,COX6B2,CRYAB,CTBP1,CYBB,DAZAP2,DDX23,DHX15,DMXL1,DNAJB2,DNM2,DOCK10,DUSP12,DUSP16,EFNB2,EIF2B5,ENC1,EPAS1,ERCC1,ERCC5,ERI3,ETS2,EXOSC10,FAM59A,FBLIM1,FOXJ2,FXR1,GANAB,GATAD2A,GINS4,GPT2 (i…	239
Renal and Urological Disease	infection	infection of kidney cell lines	1.15E-11	Decreased	-3.183	ADRBK1,AEBP2,AFG3L2,AHCTF1,ALKBH3,AMDHD2,AP1G2,AQR,ARID1A,ARID5A,ATMIN,AXL,BMP1,BTG2,C11orf9,C19orf50,CALCOCO1,CANT1,CCDC51,CCL5,CD164,CD4,CDC42EP3,CEP68,CGREF1,CHADL,CHAF1A,CHORDC1,CHRNA7,CHST1,CLIP3,CLTA,CNST,COX6B2,CRYAB,CTBP1,CYBB,DAZAP2,DDX23,DHX15,DMXL1,DNAJB2,DNM2,DOCK10,DUSP12,DUSP16,EFNB2,EIF2B5,ENC1,EPAS1,ERCC1,ERCC5,ERI3,ETS2,EXOSC10,FAM59A,FBLIM1,FOXJ2,FXR1,GANAB,GATAD2A,GINS4,GPT2 (i…	239
Neurological Disease	neurological signs	neurological signs	1.28E-11		0.389	A2M,ACADM,ACAT1,ACHE,ACTB,ACTN2,ACTN3,ADCY5,ADCY7,ADORA2A,ADRA1B,ADRA1D,ADRA2A,ADRA2B,ADRB1,ADRB2,AGXT2L1,AHCY,AK1,ALAS1,ALDH2,ALDH6A1,ANKRD11,AP1S1,APOA1,APOA4,APOD,APOE,APP,AQP1,AQP4,AR,ARHGAP32,ARHGEF1,ARIH2,ARL3,ARMCX2,ARMCX3,ARR3 (includes EG:170735),ATM,ATP1A1,ATP1A2,ATP1A4,ATP2A1,ATP2A2,ATP2B1,ATP2B2,ATP5C1,ATP5J,ATP5L,ATP5O,ATP6AP2,ATP6V1A,ATP6V1B2,B3GALT4,B3GNT1,B4GALNT1,B4GALT5,BAIAP2,B…	523
Neurological Disease	chorea	chorea	1.54E-11		1.699	A2M,ACADM,ACAT1,ACTB,ACTN2,ACTN3,ADCY5,ADCY7,ADORA2A,ADRA1B,ADRA1D,ADRB1,ADRB2,AGXT2L1,AHCY,AK1,ALAS1,ALDH2,ALDH6A1,ANKRD11,AP1S1,APOA4,APOD,APOE,AQP1,AQP4,ARHGAP32,ARHGEF1,ARIH2,ARL3,ARMCX2,ARMCX3,ARR3 (includes EG:170735),ATP1A1,ATP1A2,ATP1A4,ATP2A1,ATP2A2,ATP2B1,ATP2B2,ATP5C1,ATP5J,ATP5L,ATP5O,ATP6AP2,ATP6V1A,ATP6V1B2,B3GALT4,B3GNT1,B4GALNT1,B4GALT5,BAIAP2,BANP,BASP1,BBOX1,BCL2L1,BCL6,BCL7A,BD…	491
Cell Death	cell death	cell death of immune cells	1.57E-11		0.683	ABCC4 (includes EG:10257),ABCG1,ABL1,ACAT1,ADA,ADAM17,ADORA2A,ADRB1,AGER,AIFM1,AIMP1,AKT2,AKTIP,ANPEP,APOE,APP,ARRB1,ASAH1,ATF3,ATG3 (includes EG:171415),ATM,BAD,BAK1,BCL10,BCL2A1,BCL2L1,BCL3,BCL6,BCR,BIRC3,BIRC5,BLM,BLNK,BMF,BMP2,BMP4,BRCA1,BTK,C1QA,C5,CACNB3,CAMP,CASP2,CASP3,CASP4,CASP7,CASP8,CASP9 (includes EG:100140945),CAV1,CBFB,CCL25,CCL5,CCND2,CCR8,CD247,CD27,CD274,CD3E,CD4,CD40,CD47,CD59 …	391
Infectious Disease	replication	replication of virus	1.61E-11		1.134	ACTC1,ACTL6B,ACVR2A,ADRA1B,AGFG1,AGTRAP,AKTIP,ANPEP,AP2M1,APBB1IP,APC2 (includes EG:10297),APOBEC3B,ARAF,ARCN1,ARNTL,ATCAY,ATG5 (includes EG:11793),ATP1A2,ATP2C1,ATP6AP1,ATP6AP2,ATP6V0B,ATP6V0D1,ATP6V1A,ATP6V1B2,BAK1,BCL3,BIRC3,BNIP2,BST2,CANT1,CAPN3,CBLL1,CCL22,CCL5,CCNK,CCNT1,CD4,CD40,CD48,CD58,CDC42BPA,CDK4,CDKN1B,CEL,CIITA,CIT,CLDN3,CLIC4,CLSTN3,COLEC10,COPA,COPB1,COPG,CRAMP1L,CREB1,CREB3,CSE…	333
Neurological Disease	Huntington's disease	Huntington's disease	1.71E-11			A2M,ACADM,ACAT1,ACTB,ACTN2,ACTN3,ADCY5,ADCY7,ADORA2A,ADRA1B,ADRA1D,ADRB1,ADRB2,AGXT2L1,AHCY,AK1,ALAS1,ALDH2,ALDH6A1,ANKRD11,AP1S1,APOA4,APOD,APOE,AQP1,AQP4,ARHGAP32,ARHGEF1,ARIH2,ARL3,ARMCX2,ARMCX3,ARR3 (includes EG:170735),ATP1A1,ATP1A2,ATP1A4,ATP2A1,ATP2A2,ATP2B1,ATP2B2,ATP5C1,ATP5J,ATP5L,ATP5O,ATP6AP2,ATP6V1A,ATP6V1B2,B3GALT4,B3GNT1,B4GALNT1,B4GALT5,BAIAP2,BANP,BASP1,BBOX1,BCL2L1,BCL6,BCL7A,BD…	489
Genetic Disorder	Huntington's disease	Huntington's disease	1.71E-11			A2M,ACADM,ACAT1,ACTB,ACTN2,ACTN3,ADCY5,ADCY7,ADORA2A,ADRA1B,ADRA1D,ADRB1,ADRB2,AGXT2L1,AHCY,AK1,ALAS1,ALDH2,ALDH6A1,ANKRD11,AP1S1,APOA4,APOD,APOE,AQP1,AQP4,ARHGAP32,ARHGEF1,ARIH2,ARL3,ARMCX2,ARMCX3,ARR3 (includes EG:170735),ATP1A1,ATP1A2,ATP1A4,ATP2A1,ATP2A2,ATP2B1,ATP2B2,ATP5C1,ATP5J,ATP5L,ATP5O,ATP6AP2,ATP6V1A,ATP6V1B2,B3GALT4,B3GNT1,B4GALNT1,B4GALT5,BAIAP2,BANP,BASP1,BBOX1,BCL2L1,BCL6,BCL7A,BD…	489
Skeletal and Muscular Disorders	Huntington's disease	Huntington's disease	1.71E-11			A2M,ACADM,ACAT1,ACTB,ACTN2,ACTN3,ADCY5,ADCY7,ADORA2A,ADRA1B,ADRA1D,ADRB1,ADRB2,AGXT2L1,AHCY,AK1,ALAS1,ALDH2,ALDH6A1,ANKRD11,AP1S1,APOA4,APOD,APOE,AQP1,AQP4,ARHGAP32,ARHGEF1,ARIH2,ARL3,ARMCX2,ARMCX3,ARR3 (includes EG:170735),ATP1A1,ATP1A2,ATP1A4,ATP2A1,ATP2A2,ATP2B1,ATP2B2,ATP5C1,ATP5J,ATP5L,ATP5O,ATP6AP2,ATP6V1A,ATP6V1B2,B3GALT4,B3GNT1,B4GALNT1,B4GALT5,BAIAP2,BANP,BASP1,BBOX1,BCL2L1,BCL6,BCL7A,BD…	489
Cellular Growth and Proliferation	proliferation	proliferation of connective tissue cells	2.01E-11		0.495	ABL1,ACVR2A,AGT,AHR,AIF1 (includes EG:11629),AIMP1,AKAP12,AKT2,ALK,APC,AQP1,AR,ARID3A,ATF4,ATIC,ATM,BCL2L2,BMI1,BMP2,BMP4,BMPR1A,BMPR1B,BTC,CAPNS1,CAV1,CCNA2,CCND1,CCND2,CCND3,CCNE1,CCNF,CD40,CDK2,CDK4,CDK6,CDKN1A,CDKN1B,CDKN2B,CIITA,CITED2,CLTC,CNOT7,CSF1R,CSF2,CSK,CTCF (includes EG:10664),CTGF,CTNNB1,DACH1,DDR2 (includes EG:18214),DICER1,EDN1,EDNRA,EGFR,EIF2AK2,EMD,EPCAM,ERCC6,ERF,ESR2,ETV6,EWS…	254
Lipid Metabolism	metabolism	metabolism of membrane lipid derivative	2.17E-11	Increased	2.207	ABCA1,ABCB1,ABCC1,ABCG1,ABCG5,ABHD5,ACER1,ACSL5,ACSL6,ADRBK1,AGK,AGPAT1,AGPAT2,AGPAT6,ALDH5A1,ANGPTL3,APOA1,APOA2,APOA4,APOC3,APOE,APP,ARV1 (includes EG:292097),ASAH1,ASPG,B3GALT4,B3GNT5,B4GALNT1,B4GALT1,B4GALT4,B4GALT6,BAK1,BCL2L1,BDNF,C5,CASP8,CAT,CAV1,CD40,CD9,CDIPT,CEL,CELA3B,CEPT1,CERS1,CERS2,CERS4,CERS5,CERS6,CES1,CH25H,CHKA,CHKB,CHPT1,CLN6,CLN8,CNBP,COL4A3BP,CSF2,CYP24A1,CYP27A1,CYP39A1,CY…	247
Small Molecule Biochemistry	metabolism	metabolism of membrane lipid derivative	2.17E-11	Increased	2.207	ABCA1,ABCB1,ABCC1,ABCG1,ABCG5,ABHD5,ACER1,ACSL5,ACSL6,ADRBK1,AGK,AGPAT1,AGPAT2,AGPAT6,ALDH5A1,ANGPTL3,APOA1,APOA2,APOA4,APOC3,APOE,APP,ARV1 (includes EG:292097),ASAH1,ASPG,B3GALT4,B3GNT5,B4GALNT1,B4GALT1,B4GALT4,B4GALT6,BAK1,BCL2L1,BDNF,C5,CASP8,CAT,CAV1,CD40,CD9,CDIPT,CEL,CELA3B,CEPT1,CERS1,CERS2,CERS4,CERS5,CERS6,CES1,CH25H,CHKA,CHKB,CHPT1,CLN6,CLN8,CNBP,COL4A3BP,CSF2,CYP24A1,CYP27A1,CYP39A1,CY…	247
Neurological Disease	neuromuscular disease	neuromuscular disease	2.18E-11		-0.394	A2M,AACS,ACADM,ACAT1,ACHE,ACTB,ACTN2,ACTN3,ACTR3,ACVR2A,ADAM10,ADAM17,ADAMTS12,ADCY5,ADCY7,ADH1C (includes EG:11522),ADORA2A,ADORA2B,ADRA1B,ADRA1D,ADRA2A,ADRA2B,ADRB1,ADRB2,AGT,AGXT2L1,AHCY,AIMP2,AK1,AK5,AKT3 (includes EG:10000),ALAS1,ALB,ALCAM,ALDH2,ALDH6A1,ALK,ALOX5AP,ANKRD11,ANKS1A,ANO1,ANO6,AP1S1,AP1S2,APBB2,APOA4,APOD,APOE,APOM,APP,AQP1,AQP4,AR,ARAF,ARHGAP10,ARHGAP32,ARHGAP44,ARHGAP6,ARHGDIB…	1005
Skeletal and Muscular Disorders	neuromuscular disease	neuromuscular disease	2.18E-11		-0.394	A2M,AACS,ACADM,ACAT1,ACHE,ACTB,ACTN2,ACTN3,ACTR3,ACVR2A,ADAM10,ADAM17,ADAMTS12,ADCY5,ADCY7,ADH1C (includes EG:11522),ADORA2A,ADORA2B,ADRA1B,ADRA1D,ADRA2A,ADRA2B,ADRB1,ADRB2,AGT,AGXT2L1,AHCY,AIMP2,AK1,AK5,AKT3 (includes EG:10000),ALAS1,ALB,ALCAM,ALDH2,ALDH6A1,ALK,ALOX5AP,ANKRD11,ANKS1A,ANO1,ANO6,AP1S1,AP1S2,APBB2,APOA4,APOD,APOE,APOM,APP,AQP1,AQP4,AR,ARAF,ARHGAP10,ARHGAP32,ARHGAP44,ARHGAP6,ARHGDIB…	1005
Cellular Growth and Proliferation	colony formation	colony formation	2.83E-11		-0.172	ABL1,ACHE,ADAM17,AIFM1,AKAP12,ALDH1A1,ALDH3A1,ALK,ANKRD1,ANXA7,ATF3,ATIC,ATR,BACH2,BAMBI,BCL2L1,BECN1,BIRC5,BMI1,C1QBP,CADM1,CASP9 (includes EG:100140945),CAT,CAV1,CBL,CBLB,CCL25,CCND1,CCNE1,CCNG2,CD4,CD9,CDA,CDCA7L,CDKN1A,CDKN1B,CHEK1,CHFR,CLCA1,CLCA2,CLDN4,CLEC11A,CLTC,CLU,CNOT7,CRTC1,CSF1 (includes EG:12977),CSF1R,CSF2,CTCF (includes EG:10664),CTNNB1,CTSD,CYP2J2,CYR61,DCK,DCN,DDIT3,DHFR,DIABLO…	302
Cell Death	apoptosis	apoptosis of organ	2.85E-11		0.191	AATK,ABL1,ADA,ADCY5,ADM,ADORA2A,ADORA2B,ADRB1,ADRB2,AGT,AHR,AKT3 (includes EG:10000),ALOX15,AMH,ANGPT1,APOC3,APOE,APP,ATF7,ATM,ATP1A1,ATP2C1,AURKA,B4GALNT1,BAD,BAK1,BCL2L1,BCL2L2,BCL6,BDNF,BECN1,BHLHE23,BIRC5,BMP4,BMP7,BNIP3,BRCA1,BTG1,BTG2,C8orf4,CACNA2D2,CADM1,CAMK2D,CAMP,CAPN10,CASP2,CASP3,CASP7,CASP8,CASP9 (includes EG:100140945),CAV3,CCND1,CCNI,CCNT1,CD200,CD274,CD2AP,CD3E,CD40,CDH2,CDK1,CDK…	359
Infectious Disease	replication	replication of RNA virus	3.01E-11		1.117	ACTC1,ACTL6B,ACVR2A,ADRA1B,AGFG1,AGTRAP,AKTIP,ANPEP,AP2M1,APBB1IP,APC2 (includes EG:10297),APOBEC3B,ARAF,ARCN1,ARNTL,ATCAY,ATG5 (includes EG:11793),ATP1A2,ATP2C1,ATP6AP1,ATP6AP2,ATP6V0B,ATP6V0D1,ATP6V1A,ATP6V1B2,BAK1,BCL3,BNIP2,BST2,CANT1,CAPN3,CBLL1,CCL22,CCL5,CCNK,CCNT1,CD4,CD48,CD58,CDC42BPA,CDK4,CDKN1B,CEL,CIITA,CIT,CLDN3,CLIC4,CLSTN3,COLEC10,COPA,COPB1,COPG,CRAMP1L,CREB1,CREB3,CSE1L,CTBP1,CX…	313
Cancer	lung tumor	lung tumor	3.62E-11		0.476	ABCB1,ABCC1,ABCC2,ABCC3,ABCG2,ABL1,ACTR10,ADAM17,ADH1C (includes EG:11522),ADRA2A,ADRA2B,AGER,AGR2,AHSG,AKR1B1,AKT2,AKT3 (includes EG:10000),ALDH3A1,ALDOA,ALDOC,ALK,ALOX5,ANGPT1,ANGPTL1,ANGPTL4,ANLN,APC,AR,ARL11,ARRB2,AURKA,AURKB,BCL2L1,BCR,BIRC5,BRAF,BRF1 (includes EG:2972),BTRC,BUB1B,CA9,CACNA2D2,CAMP,CASP8,CAV1,CBLC,CCL17,CCL22,CCNA2,CCND1,CCND3,CD151,CDA,CDC20,CDC6 (includes EG:23834),CDCA5,C…	424
Respiratory Disease	lung tumor	lung tumor	3.62E-11		0.476	ABCB1,ABCC1,ABCC2,ABCC3,ABCG2,ABL1,ACTR10,ADAM17,ADH1C (includes EG:11522),ADRA2A,ADRA2B,AGER,AGR2,AHSG,AKR1B1,AKT2,AKT3 (includes EG:10000),ALDH3A1,ALDOA,ALDOC,ALK,ALOX5,ANGPT1,ANGPTL1,ANGPTL4,ANLN,APC,AR,ARL11,ARRB2,AURKA,AURKB,BCL2L1,BCR,BIRC5,BRAF,BRF1 (includes EG:2972),BTRC,BUB1B,CA9,CACNA2D2,CAMP,CASP8,CAV1,CBLC,CCL17,CCL22,CCNA2,CCND1,CCND3,CD151,CDA,CDC20,CDC6 (includes EG:23834),CDCA5,C…	424
Cardiovascular System Development and Function	angiogenesis	angiogenesis	3.68E-11		0.594	ACVR1,ADA,ADAM17,ADAM8,ADAMTS1,ADAMTS8,ADD1,ADM2,ADORA2A,ADORA2B,ADRA2A,ADRA2B,AGER,AGGF1,AGT,AHR,AIMP1,ALCAM,ALOX12,AMOT,ANG,ANGPT1,ANGPT2,ANGPT4,ANGPTL1,ANGPTL2,ANGPTL3,ANGPTL4,ANPEP,ANXA3,APC,APOE,APOH,AQP1,ARHGAP24,ATP5B,ATPIF1,AXL,B4GALT1,BDKRB2,BDNF,BIRC5,BMP2,BMP4,BMPR1A,BMX,BTC,BTG1,C1GALT1,C3,C3AR1,C5,CALR,CAMP,CASP8,CAV1,CBL,CBX2,CCL28,CCL5,CCND1,CD36,CD3E,CD40,CDH5,CDKN1B,CHD7,CHRNA7,C…	347
Cellular Growth and Proliferation	colony formation	colony formation of cells	4.49E-11		-0.247	ABL1,ACHE,ADAM17,AIFM1,AKAP12,ALDH1A1,ALDH3A1,ALK,ANKRD1,ANXA7,ATF3,ATIC,ATR,BACH2,BAMBI,BCL2L1,BECN1,BIRC5,BMI1,C1QBP,CADM1,CASP9 (includes EG:100140945),CAT,CAV1,CBL,CBLB,CCL25,CCND1,CCNE1,CCNG2,CD4,CD9,CDA,CDCA7L,CDKN1A,CDKN1B,CHEK1,CHFR,CLCA1,CLCA2,CLDN4,CLEC11A,CLTC,CLU,CNOT7,CRTC1,CSF1 (includes EG:12977),CSF1R,CSF2,CTCF (includes EG:10664),CTNNB1,CTSD,CYP2J2,CYR61,DCK,DCN,DDIT3,DHFR,DIABLO…	297
Cell Morphology	morphology	morphology of cells	5.25E-11		-1.669	ABL1,ACTN4,ACVR1C,ADA,ADD2,ADM,ADNP,ADRA2A,AGER,AHR,AHSP,AIF1 (includes EG:11629),AIFM1,APC,APOE,APP,AQP4,ARG1,ARHGAP10,ARHGEF11,ASPN,ATF3,ATP2B2,AXIN1,BAK1,BCL2L1,BCR,BLM,BMP4,BMP7,BNC1,CADM1,CASP3,CASP8,CASP9 (includes EG:100140945),CAV1,CAV3,CCND1,CD151,CD40,CD46,CD59 (includes EG:25407),CD9,CDC42EP5,CDH1,CDH5,CDK5R1,CDK5R2,CDKN1A,CDKN1B,CDKN1C,CEBPE,CEP170,CFLAR,CHN1,CHRM1,CHRM5,CITED2,CLCA1,…	314
Cell Death	apoptosis	apoptosis of connective tissue cells	5.38E-11		-1.898	ABL1,ABL2,ADM,AGER,AGT,AKT2,APP,ARR3 (includes EG:170735),ARRB2,ATF2,ATF3,BAD,BAK1,BCL2L1,BGN,BIRC3,BIRC5,BLM,BMP2,BMP4,BMPR1A,BMPR1B,C11orf82,CABLES2,CAPNS1,CASP3,CASP4,CASP8,CASP9 (includes EG:100140945),CCND1,CDH1,CDKN1A,CDKN1B,CFLAR,CIDEA,CLIC4,CLU,CREB1,CSF1 (includes EG:12977),CTBP1,CTBP2,CYCS,Cyct,CYP19A1,DAPK1,DAXX,DCN,DDIT3,DDX58,DHCR24,DIABLO,DUSP1,E2F1,EGFR,EIF2AK2,EIF4E,EMD,FADD,FAS,F…	176
Cell Cycle	G1 phase	arrest in G1 phase	5.71E-11			ABL1,ACIN1,ADRA1D,AKAP12,ALOX15,AMH,ARNT,BCR,BHLHE40,BIRC5,BLM,BMP2,BMP7,BRAF,BRCA1,BTG2,BTRC,C11orf82,CAMK1,CAMKK1,CAMKK2,CASP3,CCND1,CCND2,CCND3,CCNE1,CD247,CD40,CDC25A,CDC25B,CDC6 (includes EG:23834),CDK2,CDK4,CDK5RAP3,CDKN1A,CDKN1B,CDKN1C,CDKN2B,CDKN2D,CHEK2,CREM,CSF1 (includes EG:12977),CSF2,CYR61,DAXX,DCN,DDIT3,DUSP1,E2F1,E2F2,E2F3,E2F4,E4F1,EGFR,EIF2AK3,EPB41L1,EPO,EPOR,ESR2,ESRRG,EZH2,FAS…	174
Cell Death	apoptosis	apoptosis of fibroblasts	6.22E-11	Decreased	-2.071	ABL1,ABL2,AGER,AKT2,APP,ARR3 (includes EG:170735),ARRB2,ATF2,ATF3,BAD,BAK1,BCL2L1,BIRC3,BLM,BMP2,BMP4,C11orf82,CABLES2,CAPNS1,CASP3,CASP4,CASP8,CASP9 (includes EG:100140945),CCND1,CDH1,CDKN1A,CDKN1B,CFLAR,CLIC4,CTBP1,CTBP2,CYCS,Cyct,DAPK1,DAXX,DDIT3,DDX58,DHCR24,DIABLO,DUSP1,E2F1,EGFR,EIF2AK2,EIF4E,EMD,FADD,FAS,FOXO1 (includes EG:2308),GAB1,GNPNAT1,GSK3B,GZMA,IGF1R,IGFBP3,IKBKB,IL24,INSR,IRF3,ITG…	134
Tissue Development	development	development of bone	6.80E-11		-0.603	ACD,ACHE,ACP2,ACP5,ACVR1,ACVR2A,ACVR2B,ADAMTS4,ADAR,ADK,ADRB2,AHSG,AKT2,ALDH1A1,ALOX15,ALPL,ANKH,ANKRD11,APC,ARSB,ARSE,ASPN,ATF4,ATP6V0A4,ATP6V1B1,AXL,BCHE,BGLAP,BGN,BMI1,BMP2,BMP3,BMP4,BMP6,BMP7,BMPR1A,BMPR1B,BMPR2,C10orf58,C3,C3AR1,C5,CA2,CALB1,CALCB,CAPNS1,CARM1,CASP3,CBFB,CBS,CBX2,CCL5,CCND1,CD276,CD40,CD47,CD9,CDK13,CHD7,CHRD,CHST11,CHUK,CIITA,CLEC11A,CLEC3B,COL10A1,COL11A1,COL11A2,COL1A1,CO…	406
Connective Tissue Development and Function	development	development of bone	6.80E-11		-0.603	ACD,ACHE,ACP2,ACP5,ACVR1,ACVR2A,ACVR2B,ADAMTS4,ADAR,ADK,ADRB2,AHSG,AKT2,ALDH1A1,ALOX15,ALPL,ANKH,ANKRD11,APC,ARSB,ARSE,ASPN,ATF4,ATP6V0A4,ATP6V1B1,AXL,BCHE,BGLAP,BGN,BMI1,BMP2,BMP3,BMP4,BMP6,BMP7,BMPR1A,BMPR1B,BMPR2,C10orf58,C3,C3AR1,C5,CA2,CALB1,CALCB,CAPNS1,CARM1,CASP3,CBFB,CBS,CBX2,CCL5,CCND1,CD276,CD40,CD47,CD9,CDK13,CHD7,CHRD,CHST11,CHUK,CIITA,CLEC11A,CLEC3B,COL10A1,COL11A1,COL11A2,COL1A1,CO…	406
Skeletal and Muscular System Development and Function	development	development of bone	6.80E-11		-0.603	ACD,ACHE,ACP2,ACP5,ACVR1,ACVR2A,ACVR2B,ADAMTS4,ADAR,ADK,ADRB2,AHSG,AKT2,ALDH1A1,ALOX15,ALPL,ANKH,ANKRD11,APC,ARSB,ARSE,ASPN,ATF4,ATP6V0A4,ATP6V1B1,AXL,BCHE,BGLAP,BGN,BMI1,BMP2,BMP3,BMP4,BMP6,BMP7,BMPR1A,BMPR1B,BMPR2,C10orf58,C3,C3AR1,C5,CA2,CALB1,CALCB,CAPNS1,CARM1,CASP3,CBFB,CBS,CBX2,CCL5,CCND1,CD276,CD40,CD47,CD9,CDK13,CHD7,CHRD,CHST11,CHUK,CIITA,CLEC11A,CLEC3B,COL10A1,COL11A1,COL11A2,COL1A1,CO…	406
Cell Death	apoptosis	apoptosis of blood cells	7.75E-11		-0.354	ABCG1,ABL1,ADA,ADAM17,ADORA2A,ADRB1,AGER,AHSP,AIMP1,AKTIP,ANPEP,APOE,ARRB1,ASAH1,ATF3,ATF7,ATM,BAK1,BCL10,BCL2A1,BCL2L1,BIRC3,BLNK,BMP4,BRCA1,BTK,C1QA,C5,CAMP,CASP2,CASP3,CASP4,CASP7,CASP8,CASP9 (includes EG:100140945),CAV1,CCL25,CCL5,CCR8,CD247,CD27,CD274,CD3E,CD4,CD40,CD47,CD59 (includes EG:25407),CD9,CDK2,CDKN1A,CDKN1B,CFLAR,CHEK1,CHEK2,CHUK,CIITA,CRP,CSF1 (includes EG:12977),CSF2,CTNNB1,CXCL2…	282
Cell Cycle	M phase	M phase	8.42E-11		-1.789	AHCTF1,AKAP9,ANAPC10,ANAPC4,ANAPC5,ANLN,APC,ARL3,ATM,ATR,AURKA,AURKB,AURKC,BBS4,BECN1,BIRC5,BUB1B,BUB3 (includes EG:12237),CASC1,CCDC99,CCNE1,CCP110,CD2AP,CDC14A,CDC20,CDC23,CDC25B,CDC27,CDCA8,CDK1,CDK2,CDKN1A,CENPF,CENPV,CEP55,CETN2,CFL1,CHFR,CHMP3,CIT,CNTROB,CUL3 (includes EG:26554),CYP26B1,DCTN1,DCTN3,DIAPH3,DLGAP5,DMC1,DSTN,ECT2,EGR1,EHMT2,EIF3E,FMNL1,GADD45A,GNAI1,GNAI2,GNAI3,GPC1,HDAC1,HSF1…	141
Tissue Development	formation	formation of tissue	1.08E-10		-0.288	ACD,ACP2,ACP5,ACVR1,ACVR2B,ADAM15,ADAMTS4,ADK,ADORA2A,AKT2,ALDH1A1,ALPL,AMH,ANGPT2,ANGPTL1,ANKRD11,APC,AR,ARHGAP22,ARHGAP24,ARSB,ARSE,ATF3,ATF4,AXIN1,BDNF,BGLAP,BGN,BMI1,BMP2,BMP3,BMP4,BMP6,BMP7,BMPR1A,BMPR1B,BMPR2,C10orf58,C3,C3AR1,C5,CA2,CALCB,CAPNS1,CASP3,CASP8,CBFB,CBX2,CCL5,CCNA2,CCND1,CD276,CD47,CDH1,CDKN1A,CDKN1C,CEP290,CFL1,CHD7,CHRD,CHST3,CHUK,CITED2,CLEC3B,CNBP,COL10A1,COL11A1,COL11A2,C…	419
Post-Translational Modification	assembly	assembly of protein-protein complex	1.37E-10			AHSG,APBA1,APC,CAPZA1,CAPZA2,CASK,CD2AP,CD3E,CD40,CDC42EP2,CDK1,CHAF1A,CHAF1B,CLDN14,CLGN,CREBBP,CTNNBIP1,DARS,DLG4,DLGAP3,EIF4EBP1,FAF1 (includes EG:11124),FANCC,FAS,GCH1,GCHFR,GMNN,GSK3B,HCFC1,HES1 (includes EG:15205),HES5,HFE,HLA-DMA,HMGA1,IL2RB,JUB,KIFAP3,KPNA3,LAMC1,LLGL1,LMO4,LPXN,MAPK3,MAPK8IP2,MAX,MDM4,MED31,MGP,MLL,MNAT1,MPP7,NCKAP1L,NFS1,PARD3,PARD6B,PICALM,PINK1,PML,PPARGC1A,PPP2R1A,PP…	101
Cell Signaling	assembly	assembly of protein-protein complex	1.37E-10			AHSG,APBA1,APC,CAPZA1,CAPZA2,CASK,CD2AP,CD3E,CD40,CDC42EP2,CDK1,CHAF1A,CHAF1B,CLDN14,CLGN,CREBBP,CTNNBIP1,DARS,DLG4,DLGAP3,EIF4EBP1,FAF1 (includes EG:11124),FANCC,FAS,GCH1,GCHFR,GMNN,GSK3B,HCFC1,HES1 (includes EG:15205),HES5,HFE,HLA-DMA,HMGA1,IL2RB,JUB,KIFAP3,KPNA3,LAMC1,LLGL1,LMO4,LPXN,MAPK3,MAPK8IP2,MAX,MDM4,MED31,MGP,MLL,MNAT1,MPP7,NCKAP1L,NFS1,PARD3,PARD6B,PICALM,PINK1,PML,PPARGC1A,PPP2R1A,PP…	101
Protein Synthesis	assembly	assembly of protein-protein complex	1.37E-10			AHSG,APBA1,APC,CAPZA1,CAPZA2,CASK,CD2AP,CD3E,CD40,CDC42EP2,CDK1,CHAF1A,CHAF1B,CLDN14,CLGN,CREBBP,CTNNBIP1,DARS,DLG4,DLGAP3,EIF4EBP1,FAF1 (includes EG:11124),FANCC,FAS,GCH1,GCHFR,GMNN,GSK3B,HCFC1,HES1 (includes EG:15205),HES5,HFE,HLA-DMA,HMGA1,IL2RB,JUB,KIFAP3,KPNA3,LAMC1,LLGL1,LMO4,LPXN,MAPK3,MAPK8IP2,MAX,MDM4,MED31,MGP,MLL,MNAT1,MPP7,NCKAP1L,NFS1,PARD3,PARD6B,PICALM,PINK1,PML,PPARGC1A,PPP2R1A,PP…	101
Cellular Growth and Proliferation	proliferation	proliferation of breast cancer cell lines	1.56E-10		0.551	AMOT,AR,ARRDC3,ASAH1,ATM,BAD,BCAR1,BDKRB2,BEX2,BMP7,BMX,BRCA1,BTC,BUB1 (includes EG:100307076),C1QBP,CARD10,CASP8,CAV1,CCND1,CCND2,CCNE1,CCNE2,CD151,CDC16,CDH1,CDK1,CDKN1A,CHKA,CLCA2,CLU,COPS2,COPS3,COPS4,CSE1L,CSF1 (includes EG:12977),CSF2,CST6 (includes EG:1474),CTCF (includes EG:10664),CXCR4,DCN,E2F1,EEF1B2,EGFR,EIF3A,EIF3E,EIF3H,ELAVL1,EPHA2,EPO,ESR2,ETS2,FBXW7,FGF1,FGF2,FGF7,FGF8,FGFR2,FOXM1…	160
Carbohydrate Metabolism	synthesis	synthesis of carbohydrate	2.63E-10		1.997	ABCC8,ABHD5,ACADM,Acan,ADORA2A,ADORA2B,ADRA1B,ADRB2,ADRBK1,ADRBK2,AGK,AGPAT1,AGPAT2,AGPAT6,AKR1A1,AKR1B1,AKT2,ALG2,ANGPT1,APOA1,APOA2,APOE,ASPN,B3GALNT1,B3GALT2,B3GALT6,B3GAT2,B3GAT3,B4GALNT1,B4GALT1,C1QL3,C1QTNF2,C5,CCND3,CD36,CD40,CDIPT,CEPT1,CERS5,CHKA,CHKB,CHPT1,CHRM1,CHST11,CHST12,CHST13,CHST3,CHST6,CHSY1,COG2 (includes EG:22796),CSF1 (includes EG:12977),CSF1R,CSGALNACT1,CSGALNACT2,CTGF,CTNN…	253
Lipid Metabolism	synthesis	synthesis of phospholipid	3.82E-10		1.760	ABHD5,ACSL5,ACSL6,AGK,AGPAT1,AGPAT2,AGPAT6,APOA1,APOA2,C5,CD40,CDIPT,CEPT1,CERS5,CES1,CHKA,CHKB,CHPT1,CYP7A1,DGKE,EDN1,ETNK2,F2,FABP3,FADS1,FASN,FGF7,FLT1,GAPVD1,GPAM,GRP,HEXB,HTR2A,HTR2B,IL1B,IL8,IMPA1,INPP5E,ITGB1,KDR,LCAT,LPCAT1,LPCAT2,LYN,MTOR,MYD88,NCS1,NGF,NOX1,NTRK1,OSBP,PCYT1A,PCYT1B,PCYT2,PDGFA,PDGFRB,PEMT,PEX11B,PEX7 (includes EG:18634),PGS1,PI4K2A,PI4KA,PI4KB,PIGO,PIK3C2A,PIK3C2B,PIK3C…	107
Small Molecule Biochemistry	synthesis	synthesis of phospholipid	3.82E-10		1.760	ABHD5,ACSL5,ACSL6,AGK,AGPAT1,AGPAT2,AGPAT6,APOA1,APOA2,C5,CD40,CDIPT,CEPT1,CERS5,CES1,CHKA,CHKB,CHPT1,CYP7A1,DGKE,EDN1,ETNK2,F2,FABP3,FADS1,FASN,FGF7,FLT1,GAPVD1,GPAM,GRP,HEXB,HTR2A,HTR2B,IL1B,IL8,IMPA1,INPP5E,ITGB1,KDR,LCAT,LPCAT1,LPCAT2,LYN,MTOR,MYD88,NCS1,NGF,NOX1,NTRK1,OSBP,PCYT1A,PCYT1B,PCYT2,PDGFA,PDGFRB,PEMT,PEX11B,PEX7 (includes EG:18634),PGS1,PI4K2A,PI4KA,PI4KB,PIGO,PIK3C2A,PIK3C2B,PIK3C…	107
Cellular Movement	invasion	invasion of cells	3.86E-10		1.176	ACAT1,ADAM17,ADAM21,ADAM9,ADAMTS15,ADI1 (includes EG:104923),ADM,AFAP1L1,AGAP2,AGER,AGR2,AGT,AKT2,AKT3 (includes EG:10000),ANGPT2,ANPEP,APP,AR,ARRDC3,ASAP1,ASGR1,ATF1 (includes EG:100040260),ATF3,ATP6V0A4,AURKA,AXL,AZGP1,B3GNT1,B4GALT5,BATF3,BCAN,BCAR1,BDNF,BMP4,BMP7,BRAF,BTC,CA3,CALR,CARD10,CASP3,CAT,CAV1,CBL,CBX5,CCND1,CCR7,CD14,CD151,CD9,CD97,CDC25B,CDH1,CDH2,CDH4,CDK5RAP3,CDKN1B,CHFR,CHRD,CHS…	383
Cell Cycle	S phase	S phase	4.67E-10		-1.482	ABL1,AGK,APBB1,APBB2,APC,APP,AR,ARAF,ATM,BAD,BCL2L1,BCR,BHLHE40,BIRC5,BMI1,BMP7,BRAF,BRCA1,C13orf15,CAV1,CBX2,CCNA2,CCND1,CCND2,CCND3,CCNE1,CCNG2,CD40,CDC25A,CDC25C,CDC6 (includes EG:23834),CDC7 (includes EG:12545),CDH1,CDK1,CDK2,CDK2AP1,CDK4,CDK6,CDKN1A,CDKN1B,CDKN1C,CDT1,CHEK1,CHEK2,CHRNA7,CREBBP,CRLF3,CSF1 (includes EG:12977),CTNND1,CUL3 (includes EG:26554),DBF4 (includes EG:10926),DDX3X,DMTF1…	180
Cancer	lung cancer	lung cancer	4.82E-10		-0.029	ABCB1,ABCC1,ABCC2,ABCC3,ABCG2,ABL1,ACTR10,ADAM17,ADH1C (includes EG:11522),ADRA2A,ADRA2B,AHSG,AKT2,AKT3 (includes EG:10000),ALDH3A1,ALDOA,ALDOC,ALK,ALOX5,ANGPT1,ANGPTL1,ANGPTL4,ANLN,APC,AR,ARL11,ARRB2,AURKA,AURKB,BCR,BIRC5,BRAF,BTRC,BUB1B,CA9,CACNA2D2,CAMP,CASP8,CAV1,CBLC,CCL17,CCL22,CCNA2,CCND1,CCND3,CD151,CDA,CDC20,CDC6 (includes EG:23834),CDCA5,CDCA8,CDH1,CDH13,CDK1,CDK4,CDK6,CDKN1A,CDKN1B,CDK…	385
Genetic Disorder	lung cancer	lung cancer	4.82E-10		-0.029	ABCB1,ABCC1,ABCC2,ABCC3,ABCG2,ABL1,ACTR10,ADAM17,ADH1C (includes EG:11522),ADRA2A,ADRA2B,AHSG,AKT2,AKT3 (includes EG:10000),ALDH3A1,ALDOA,ALDOC,ALK,ALOX5,ANGPT1,ANGPTL1,ANGPTL4,ANLN,APC,AR,ARL11,ARRB2,AURKA,AURKB,BCR,BIRC5,BRAF,BTRC,BUB1B,CA9,CACNA2D2,CAMP,CASP8,CAV1,CBLC,CCL17,CCL22,CCNA2,CCND1,CCND3,CD151,CDA,CDC20,CDC6 (includes EG:23834),CDCA5,CDCA8,CDH1,CDH13,CDK1,CDK4,CDK6,CDKN1A,CDKN1B,CDK…	385
Respiratory Disease	lung cancer	lung cancer	4.82E-10		-0.029	ABCB1,ABCC1,ABCC2,ABCC3,ABCG2,ABL1,ACTR10,ADAM17,ADH1C (includes EG:11522),ADRA2A,ADRA2B,AHSG,AKT2,AKT3 (includes EG:10000),ALDH3A1,ALDOA,ALDOC,ALK,ALOX5,ANGPT1,ANGPTL1,ANGPTL4,ANLN,APC,AR,ARL11,ARRB2,AURKA,AURKB,BCR,BIRC5,BRAF,BTRC,BUB1B,CA9,CACNA2D2,CAMP,CASP8,CAV1,CBLC,CCL17,CCL22,CCNA2,CCND1,CCND3,CD151,CDA,CDC20,CDC6 (includes EG:23834),CDCA5,CDCA8,CDH1,CDH13,CDK1,CDK4,CDK6,CDKN1A,CDKN1B,CDK…	385
Neurological Disease	movement disorder	movement disorder	4.94E-10		-0.568	A2M,ACADM,ACAT1,ACHE,ACP2,ACTB,ACTN2,ACTN3,ACTR3,ACVR2A,ADAMTS12,ADCY5,ADCY7,ADH1C (includes EG:11522),ADORA2A,ADORA2B,ADRA1B,ADRA1D,ADRA2A,ADRA2B,ADRB1,ADRB2,AFF1,AGXT2L1,AHCY,AIMP2,AK1,ALAS1,ALDH2,ALDH5A1,ALDH6A1,AMY2A,ANKRD11,ANKS1A,ANO1,AP1S1,AP1S2,APBB2,APOA4,APOD,APOE,APP,AQP1,AQP4,ARAF,ARHGAP10,ARHGAP32,ARHGDIB,ARHGEF1,ARHGEF10,ARIH2,ARL3,ARL6IP5,ARMCX2,ARMCX3,ARR3 (includes EG:170735),ARS…	904
Cellular Development	differentiation	differentiation of blood cells	6.01E-10	Increased	3.915	ABL1,ACVR1B,ACVR2A,ADA,ADAM17,ADD1,AGER,AHR,AHSP,AKT2,ALAS2,AP3B1,AP3D1,APC,APP,ATM,ATP7A,AXL,B4GALNT1,BAD,BAIAP2,BCL2A1,BCL2L1,BCL3,BCL6,BCR,BDNF,BLM,BLNK,BMI1,BMP2,BMP4,BMPR1A,BTG2,BTK,C1QC,CAMP,CARD11,CASP8,CBFA2T3,CBFB,CBL,CCR7,CD14,CD274,CD3D,CD3E,CD4,CD40,CD47,CD80 (includes EG:12519),CD86,CD8A,CDK6,CDKN1B,CDKN2B,CDKN2D,CEBPD,CEBPE,CHD7,CITED2,CLEC11A,CRTC2,CSF1 (includes EG:12977),CSF1R,CS…	408
Hematological System Development and Function	differentiation	differentiation of blood cells	6.01E-10	Increased	3.915	ABL1,ACVR1B,ACVR2A,ADA,ADAM17,ADD1,AGER,AHR,AHSP,AKT2,ALAS2,AP3B1,AP3D1,APC,APP,ATM,ATP7A,AXL,B4GALNT1,BAD,BAIAP2,BCL2A1,BCL2L1,BCL3,BCL6,BCR,BDNF,BLM,BLNK,BMI1,BMP2,BMP4,BMPR1A,BTG2,BTK,C1QC,CAMP,CARD11,CASP8,CBFA2T3,CBFB,CBL,CCR7,CD14,CD274,CD3D,CD3E,CD4,CD40,CD47,CD80 (includes EG:12519),CD86,CD8A,CDK6,CDKN1B,CDKN2B,CDKN2D,CEBPD,CEBPE,CHD7,CITED2,CLEC11A,CRTC2,CSF1 (includes EG:12977),CSF1R,CS…	408
Cancer	lymphoid cancer	lymphoid cancer	6.30E-10		-0.194	ABCA7,ABCB1,ABL1,ADA,ADORA2A,AIMP1,AKT2,AKT3 (includes EG:10000),ALAD,ALK,AMY2A,ATM,AURKB,BCL10,BCL2L1,BCL3,BCL6,BCR,BECN1,BIRC5,BMI1,BRAF,BRCA1,BRD2,BTG1,BTG2,CARD11,CARD9,CASP3,CCND1,CCND3,CCNH,CCR7,CD163,CD247,CD3D,CD3E,CD3G,CD40,CD58,CD8A,CDK1,CDK19,CDK2,CDK3,CDK4,CDK5,CDK6,CDK7,CDKN1A,CDKN1B,CDKN2C,CFLAR,CHEK1,CHRNA1,CHRNA10,CHRNA5,CHRNA7,CHRNA9,CHRNB1,CHRNB2,CHRND,CHRNE,CHRNG,CIITA,CMIP,COL…	318
Cancer	digestive organ tumor	digestive organ tumor	7.28E-10		-0.689	A1BG,ABCA5,ABCB1,ABCB11,ABCC1,ABCC2,ABCC3,ABCC4 (includes EG:10257),ABCD3,ABCG2,ABL1,ACADS,ACLY,ACOT7,ACOX1,ACOX2,ACSL5,ACVR2A,ADA,ADAM17,ADAM9,ADAMTS1,ADAMTS15,ADH1C (includes EG:11522),ADORA2A,ADRA1B,ADRA1D,ADSL,AFP,AHCY,AHR,AIMP1,AKAP1,AKR1B1,ALAS1,ALB,ALDH5A1,ALPL,AMBP,AMY2A,ANGPT2,ANGPTL2,ANKRD35,ANKRD9,ANLN,ANPEP,ANTXR1,ANXA11,ANXA4,APC,APOE,AQP3,AR,ARAF,ARG2 (includes EG:11847),ARHGAP18,AR…	1064
Gastrointestinal Disease	digestive organ tumor	digestive organ tumor	7.28E-10		-0.689	A1BG,ABCA5,ABCB1,ABCB11,ABCC1,ABCC2,ABCC3,ABCC4 (includes EG:10257),ABCD3,ABCG2,ABL1,ACADS,ACLY,ACOT7,ACOX1,ACOX2,ACSL5,ACVR2A,ADA,ADAM17,ADAM9,ADAMTS1,ADAMTS15,ADH1C (includes EG:11522),ADORA2A,ADRA1B,ADRA1D,ADSL,AFP,AHCY,AHR,AIMP1,AKAP1,AKR1B1,ALAS1,ALB,ALDH5A1,ALPL,AMBP,AMY2A,ANGPT2,ANGPTL2,ANKRD35,ANKRD9,ANLN,ANPEP,ANTXR1,ANXA11,ANXA4,APC,APOE,AQP3,AR,ARAF,ARG2 (includes EG:11847),ARHGAP18,AR…	1064
Cell Death	cell death	cell death of T lymphocytes	7.43E-10		-0.071	ABL1,ADA,ADORA2A,ADRB1,AIFM1,AKTIP,APOE,ARRB1,ATG3 (includes EG:171415),ATM,BAD,BAK1,BCL10,BCL2L1,BCL3,BIRC5,BMF,BMP4,BRCA1,CASP3,CASP7,CASP8,CASP9 (includes EG:100140945),CAV1,CCL25,CCL5,CCR8,CD247,CD27,CD274,CD3E,CD4,CD40,CD47,CD59 (includes EG:25407),CD9,CDK1,CDK2,CDKN1A,CFLAR,CHEK1,CHEK2,CHUK,CIITA,CST3,CTNNB1,CTSD,CXCR4,DDIT4,DEF6,DFFA,DICER1,DLL4,DNAJA3,E2F1,E2F2,EFNA1,EGR1,EGR3,ETS2,EZR,FA…	182
Cell Death	apoptosis	apoptosis of neurons	1.11E-09		-1.067	AARS,AATK,ADA,ADAM8,ADNP,ADORA2A,AGAP2,AGRN,AGT,AIFM1,ALOX15,APOE,APP,ATF3,ATM,ATN1,ATP1A2,ATP2C1,ATRX,AXL,B4GALNT1,BAD,BAK1,BCL2L1,BDNF,BIRC5,BMPR1B,BNIP3,BOK,BRAF,CACNA1A,CACNA2D2,CALB1,CASP2,CASP3,CASP6,CASP7,CASP9 (includes EG:100140945),CCL5,CD200,CDK1,CDK5,CDK5R1,CDKN1A,CDKN2D,CHUK,CNTFR,CREB1,CRLF1,CTSB,CTSL2,CYBA,CYCS,DIABLO,DICER1,DLX1,DLX2,DNAJC5,DUSP1,E2F1,EPHA7,EPO,EPOR,ERBB3,ETV6,F2,…	208
Organismal Survival	survival	survival of organism	1.13E-09		0.479	ABCA3,ABCB1,ABCC1,ABCC4 (includes EG:10257),ABL1,ACTC1,ACTG2,ADM,ADORA2B,ADRA2A,ADRB2,ADRBK1,AGER,AGPAT2,AGT,AGXT,ALDH5A1,ANGPT2,ANTXR2,APC,APOA1,APOE,AQP1,AR,ARG1,ARNT,ARRDC4,ASAH1,ATM,ATN1,ATP2C1,ATR,AURKB,B3GALNT1,BAD,BCL2A1,BCL2L1,BCL6,BCR,BDNF,BGN,BIRC5,BMP7,C3,C5,CACNA1A,CAMK2N2,CAMP,CARD9,CASP8,CCND2,CCNT2,CD14,CD4,CD40,CD47,CD80 (includes EG:12519),CDC25A,CDC7 (includes EG:12545),CDCA8,CD…	366
Cellular Development	development	development of blood cells	1.15E-09	Increased	3.494	ABL1,ACHE,ADA,ADAM10,ADAM17,ADAR,ADD2,ADM,AFF1,AHCTF1,AHR,AKT2,ANGPT1,AP3B1,AP3D1,APC,ATM,ATP7A,AXL,BAD,BCHE,BCL2A1,BCL2L1,BCL3,BCL6,BIRC5,BLM,BLNK,BMI1,BMP4,BRCA1,BST1 (includes EG:12182),BTK,CALCB,CARD11,CBL,CCL25,CCND3,CCR7,CD244,CD247,CD274,CD3D,CD3E,CD3G,CD4,CD80 (includes EG:12519),CD83,CD86,CD8A,CD9,CDK13,CDK2,CDK6,CDKN1A,CDKN1B,CHD4,CHD7,CHEK1,CIAPIN1,CITED2,CLEC11A,CNN2,CREB1,CREBBP,CSF1…	384
Hematological System Development and Function	development	development of blood cells	1.15E-09	Increased	3.494	ABL1,ACHE,ADA,ADAM10,ADAM17,ADAR,ADD2,ADM,AFF1,AHCTF1,AHR,AKT2,ANGPT1,AP3B1,AP3D1,APC,ATM,ATP7A,AXL,BAD,BCHE,BCL2A1,BCL2L1,BCL3,BCL6,BIRC5,BLM,BLNK,BMI1,BMP4,BRCA1,BST1 (includes EG:12182),BTK,CALCB,CARD11,CBL,CCL25,CCND3,CCR7,CD244,CD247,CD274,CD3D,CD3E,CD3G,CD4,CD80 (includes EG:12519),CD83,CD86,CD8A,CD9,CDK13,CDK2,CDK6,CDKN1A,CDKN1B,CHD4,CHD7,CHEK1,CIAPIN1,CITED2,CLEC11A,CNN2,CREB1,CREBBP,CSF1…	384
Hematopoiesis	development	development of blood cells	1.15E-09	Increased	3.494	ABL1,ACHE,ADA,ADAM10,ADAM17,ADAR,ADD2,ADM,AFF1,AHCTF1,AHR,AKT2,ANGPT1,AP3B1,AP3D1,APC,ATM,ATP7A,AXL,BAD,BCHE,BCL2A1,BCL2L1,BCL3,BCL6,BIRC5,BLM,BLNK,BMI1,BMP4,BRCA1,BST1 (includes EG:12182),BTK,CALCB,CARD11,CBL,CCL25,CCND3,CCR7,CD244,CD247,CD274,CD3D,CD3E,CD3G,CD4,CD80 (includes EG:12519),CD83,CD86,CD8A,CD9,CDK13,CDK2,CDK6,CDKN1A,CDKN1B,CHD4,CHD7,CHEK1,CIAPIN1,CITED2,CLEC11A,CNN2,CREB1,CREBBP,CSF1…	384
Hematological System Development and Function	quantity	quantity of blood cells	1.24E-09	Increased	2.648	ABCA1,ABCG2,ACAT1,ACHE,ADA,ADD2,ADORA2A,AFF1,AGER,AGT,AHR,AHSP,ALOX5,AMBP,ANK2,APOA1,APOE,APP,ATF3,ATF4,ATM,B4GALNT1,BAD,BAK1,BCL10,BCL2A1,BCL2L1,BDNF,BIRC5,BLM,BLNK,BMI1,BST1 (includes EG:12182),BTK,C1QA,C3,CAMP,CAPNS1,CARD11,CARM1,CASP8,CBFB,CBL,CBS,CCL22,CCL28,CCL5,CCR6,CCR7,CD180,CD200,CD244,CD247,CD27,CD274,CD3D,CD3E,CD3G,CD4,CD40,CD47,CD59 (includes EG:25407),CD72,CD80 (includes EG:12519),C…	443
Tissue Morphology	quantity	quantity of blood cells	1.24E-09	Increased	2.648	ABCA1,ABCG2,ACAT1,ACHE,ADA,ADD2,ADORA2A,AFF1,AGER,AGT,AHR,AHSP,ALOX5,AMBP,ANK2,APOA1,APOE,APP,ATF3,ATF4,ATM,B4GALNT1,BAD,BAK1,BCL10,BCL2A1,BCL2L1,BDNF,BIRC5,BLM,BLNK,BMI1,BST1 (includes EG:12182),BTK,C1QA,C3,CAMP,CAPNS1,CARD11,CARM1,CASP8,CBFB,CBL,CBS,CCL22,CCL28,CCL5,CCR6,CCR7,CD180,CD200,CD244,CD247,CD27,CD274,CD3D,CD3E,CD3G,CD4,CD40,CD47,CD59 (includes EG:25407),CD72,CD80 (includes EG:12519),C…	443
Cancer	transformation	transformation of fibroblast cell lines	1.48E-09		0.088	ABL1,ACOX1,ADM,AKT2,AKT3 (includes EG:10000),ALK,ANP32A,ARAF,ARHGAP32,ARHGEF1,ASPH,ATF3,ATIC,AURKA,AURKB,AXL,BCKDHA,BCL6,BCR,BMI1,BRAF,BTG2,CCNA2,CCND1,CCND3,CCNE1,CD4,CDK6,CDKN1A,CDKN1B,CDKN2B,CHRM1,CHRM5,CLTC,CLU,COL1A1,CRK,CSF1 (includes EG:12977),CSF1R,CSF2RB,DFFB,DMTF1,DNMT1,DYNLL1,E2F1,EEF1D,EFNB1,EGFR,EIF3I,EIF4E,EPS8,ERBB3,ERRFI1,ETS1,ETV6,EWSR1,F2R,FBXO7,FES,FGF1,FGFR1,FGFR3,FGFR4,FLI1,F…	178
RNA Post-Transcriptional Modification	processing	processing of RNA	1.75E-09		-0.317	AARS,AGGF1,ALB,APP,ARL6IP4,ATXN3,BARD1,BCAS2,BOP1/LOC727967,CDC40 (includes EG:361859),CDC5L,CDK12,CDK13,CDK7,CELF1,CELF3,CELF4,CELF6,CLK2,CLK3,CLK4,CLP1 (includes EG:10978),CPSF1,CPSF3,CPSF6,CRNKL1,CSTF1,CSTF2T,CSTF3,DBR1 (includes EG:323746),DDX17,DDX20,DDX39A,DDX39B,DDX41,DDX47,DDX52,DDX54,DDX56,DHX38,DHX8,DICER1,DIS3,DKC1,DUSP11,EBNA1BP2,EFTUD2,EPB41,ESRP2,EXOSC3,FARS2,FUS,GEMIN2,GEMIN4,GEMIN…	198
DNA Replication, Recombination, and Repair	DNA damage response	DNA damage response of cells	1.80E-09		-1.034	AIFM1,APBB1,APC,APLF,APTX,ASH2L,ATM,ATR,BAZ1B,BCL3,BCL6,BLM,BRCA1,BRSK1,BRSK2,BTG2,C16orf5,C9orf80,CASP3,CASP9 (includes EG:100140945),CCND1,CDK1,CDKN1A,CDKN1B,CHD1L,CHEK1,CHEK2,CIB1,CIDEA,CIDEB,DDIT3,DTX3L,DYRK2,ERCC1,ERCC6,ERCC8,FANCD2,FANCG,FBXO31,GADD45A,GNL1,H2AFX,HINFP,HIPK1,HIPK2,HMOX1,INTS3,KAT5,KAT8,LYN,MAEL,MAPK3,MBD4,MCM7,MEN1,MIF,MLH1,MRE11A,MSH2,MSH6,MYO6,NBN,NCOA6,NFATC2,NIPBL,NUDT1…	119
Cancer	uterine leiomyoma	uterine leiomyoma	1.85E-09			ABI2,ACTC1,AHR,AK2,AKAP8L,ALDH1A1,ALDOA,ANAPC10,ARFGEF2,ARIH2,ARL4D,ARNT,ARSE,ASB5,ASH2L,ATRN,ATRNL1,AURKB,BCL10,BDH1 (includes EG:100037356),C18orf1,CALCRL,CAPN6,CBL,CD97,CDC7 (includes EG:12545),CETN3,CGRRF1,CLCN5,CLDN11,CLEC16A,CNP,CRABP2,CRY2,CTNND1,CTSC,CXCL14,CYBA,CYP19A1,CYR61,DDX24,DDX6,DNTTIP2,DPT,DR1,DST,DVL1,DYRK2,ECM2 (includes EG:1842),EDNRB,EGFR,EIF4EBP1,EMCN,ERAL1,ESRRG,EZH1,FAS,FB…	179
Reproductive System Disease	uterine leiomyoma	uterine leiomyoma	1.85E-09			ABI2,ACTC1,AHR,AK2,AKAP8L,ALDH1A1,ALDOA,ANAPC10,ARFGEF2,ARIH2,ARL4D,ARNT,ARSE,ASB5,ASH2L,ATRN,ATRNL1,AURKB,BCL10,BDH1 (includes EG:100037356),C18orf1,CALCRL,CAPN6,CBL,CD97,CDC7 (includes EG:12545),CETN3,CGRRF1,CLCN5,CLDN11,CLEC16A,CNP,CRABP2,CRY2,CTNND1,CTSC,CXCL14,CYBA,CYP19A1,CYR61,DDX24,DDX6,DNTTIP2,DPT,DR1,DST,DVL1,DYRK2,ECM2 (includes EG:1842),EDNRB,EGFR,EIF4EBP1,EMCN,ERAL1,ESRRG,EZH1,FAS,FB…	179
Developmental Disorder	hypertrophy	hypertrophy	1.89E-09		1.175	ABCC8,ABL1,ACTC1,ACTG2,ADAM17,ADM,ADRA2A,ADRB1,ADRB2,AGER,AGT,AHR,AKAP1,ALOX15,ANGPT1,ANGPT2,APOE,APP,AR,ARAF,ATF3,ATM,BCR,BDNF,BIRC5,BMP2,BMPR1A,BMPR2,BMX,C3,CACNA1H,CACNB3,CAMK2D,CASQ2,CAT,CAV1,CAV3,CCNT1,CDK4,CDKN1A,CDKN1B,COL1A1,COL9A2,CORIN,CREB1,CREM,CRYAB,CSF2,CSRP3,CTF1,CTNNB1,CTSB,CTSC,CTSD,CYBA,CYP19A1,DAG1,DES,DICER1,DNAJC3,DPP4,DUSP1,DYRK1A,EDN1,EDNRA,EEF1D,EGFR,ELN,EPAS1,EPO,EPOR,ESR…	260
Cellular Assembly and Organization	formation	formation of filaments	1.96E-09		-0.139	A2M,ACTA1,ACTC1,ACTR3,AKAP1,AMOT,APC,APOE,APP,AR,ARAP1,ARHGAP32,ARHGAP6,ARHGEF1,ARHGEF10,ARHGEF10L,ARHGEF11,ARHGEF2,ARHGEF3,ARL2,ARPC2,ARRB1,BACE1,BAG4,BCAR1,BDKRB2,BIRC5,BRAF,BRK1,C3AR1,Cald1,CAV1,CAV3,CDC25B,CDC42EP2,CDC42EP5,CDKN1B,CENPF,CENPJ,CFL1,CHCHD2,CHRM1,CLIP1,CLIP3,CNP,CNTNAP1,COL18A1,CORO1A,CRYAB,CTGF,CTNND1,CUL3 (includes EG:26554),DCTN1,DLGAP5,DPYSL2,DSTN,EDN1,EDNRA,EGFR,ELN,F2,F2R,…	216
Cancer	genital tumor	genital tumor	1.99E-09		-0.836	ABCA5,ABCB1,ABCC1,ABCC3,ABCC4 (includes EG:10257),ABL1,ACO1,ACTC1,ADA,ADRB1,AFAP1,AFP,AGER,AGPAT2,AGR2,AKR1B1,AKT2,AKT3 (includes EG:10000),ALCAM,ALDH1A1,ALDH2,ALDH3A1,ALDH5A1,ALDH7A1,ALK,ALOX12,ALOX5,AMFR,AMH,AMY2A,ANGPT1,ANO6,ANTXR1,ANTXR2,ANXA10,APC,APOD,APOE,APOLD1,AR,ARG2 (includes EG:11847),ARHGDIB,ARL4C,ASCL2,ASPH,ASS1,ATM,ATP1A1,ATP1A2,ATP1A4,ATP6V1B1,ATP8B1,ATXN1,AURKA,AURKB,AXDND1,AXIN1…	674
Reproductive System Disease	genital tumor	genital tumor	1.99E-09		-0.836	ABCA5,ABCB1,ABCC1,ABCC3,ABCC4 (includes EG:10257),ABL1,ACO1,ACTC1,ADA,ADRB1,AFAP1,AFP,AGER,AGPAT2,AGR2,AKR1B1,AKT2,AKT3 (includes EG:10000),ALCAM,ALDH1A1,ALDH2,ALDH3A1,ALDH5A1,ALDH7A1,ALK,ALOX12,ALOX5,AMFR,AMH,AMY2A,ANGPT1,ANO6,ANTXR1,ANTXR2,ANXA10,APC,APOD,APOE,APOLD1,AR,ARG2 (includes EG:11847),ARHGDIB,ARL4C,ASCL2,ASPH,ASS1,ATM,ATP1A1,ATP1A2,ATP1A4,ATP6V1B1,ATP8B1,ATXN1,AURKA,AURKB,AXDND1,AXIN1…	674
Cell Death	apoptosis	apoptosis of cervical cancer cell lines	2.55E-09		0.039	ABCB1,ABL1,AIFM1,APOPT1,ATG5 (includes EG:11793),ATP2A1,BAD,BAK1,BBS4,BCL2L1,BECN1,BIRC5,BIRC7,BNIP2,BOK,C15orf63,CAMP,CASP2,CASP3,CASP4,CASP8,CAT,CCND3,CDC20,CDC6 (includes EG:23834),CDC7 (includes EG:12545),CDK1,CDKN1A,CDKN1B,CDKN2C,CHMP5,CIDEB,COX5A (includes EG:12858),CSF1R,CSNK2A1,CSNK2A2,DAPK1,DAXX,DDIT3,DIABLO,DNAJA3,E2F1,EGFR,EIF2AK2,EIF4G2,ELAVL1,EXOC2,FADD,FAS,FER,FHIT,FLNB,FOS,FST,G0S2…	164
Cell Signaling	I-kappaB kinase/NF-kappaB cascade	I-kappaB kinase/NF-kappaB cascade	2.77E-09		0.278	APOL3,ATP2C1,AZI2,BCL10,BCL3,BST2,BTK,BTRC,CANT1,CARD11,CARD6,CARD9,CC2D1A,CD36,CHUK,CSNK2B,CTNNB1,CXXC5,DAB2IP,DNAJA3,ECM1 (includes EG:100332249),ECT2,EDA,EEF1D,F2RL1,FAIM,FKBP1A,FLNA,GJA1,GOLT1B,HMOX1,HSPB1,IKBKB,IL1A,IL1B,IL1RL1,IRAK1BP1,JUB,LGALS1,LGALS9,LITAF,MALT1,MAP3K14,MAP3K7 (includes EG:172842),MAVS,MIB2,MIER1,MTDH,MUL1,MYD88,NDFIP2,NFKBID,NLRC3,NOD2,OTUD7B,PARK2,PELI1,PIM2,PINK1,PLEK…	106
Cell Death	apoptosis	apoptosis of leukocytes	2.82E-09		-0.364	ABCG1,ABL1,ADA,ADAM17,ADORA2A,ADRB1,AIMP1,AKTIP,ANPEP,APOE,ARRB1,ASAH1,ATF3,ATM,BAK1,BCL10,BCL2A1,BCL2L1,BIRC3,BLNK,BMP4,BRCA1,BTK,C1QA,C5,CAMP,CASP2,CASP3,CASP4,CASP7,CASP8,CASP9 (includes EG:100140945),CAV1,CCL25,CCL5,CCR8,CD247,CD27,CD274,CD3E,CD4,CD40,CD47,CD59 (includes EG:25407),CD9,CDK2,CDKN1A,CDKN1B,CFLAR,CHEK1,CHEK2,CHUK,CIITA,CRP,CSF1 (includes EG:12977),CSF2,CTNNB1,CXCL2,CXCR4,CYBB,DDI…	260
Cancer	non-small cell lung cancer	non-small cell lung cancer	2.87E-09			ABCB1,ABL1,ACTR10,ADAM17,AKT2,AKT3 (includes EG:10000),ALDH3A1,ALK,ANLN,AR,AURKA,AURKB,BIRC5,BRAF,BTRC,CA9,CACNA2D2,CASP8,CBLC,CCNA2,CCND1,CDA,CDCA8,CDH1,CDH13,CDK4,CDK6,CDKN1A,CDKN1B,CHRM1,CHRM4,CHRM5,CLCN3,CSF1 (includes EG:12977),CSF1R,CTNNB1,CTSD,CTSK,CYGB,CYP19A1,CYP1B1,CYP24A1,DCK,DHFR,DICER1,DNAJB4,DPYD,DUSP6,ECT2,EGFR,EIF4A1,EIF4E,ENG,ENO1,EPAS1,EPB41L4B,EPCAM,EPHA2,EPHB4,EPO,EPOR,ERBB3,E…	231
Genetic Disorder	non-small cell lung cancer	non-small cell lung cancer	2.87E-09			ABCB1,ABL1,ACTR10,ADAM17,AKT2,AKT3 (includes EG:10000),ALDH3A1,ALK,ANLN,AR,AURKA,AURKB,BIRC5,BRAF,BTRC,CA9,CACNA2D2,CASP8,CBLC,CCNA2,CCND1,CDA,CDCA8,CDH1,CDH13,CDK4,CDK6,CDKN1A,CDKN1B,CHRM1,CHRM4,CHRM5,CLCN3,CSF1 (includes EG:12977),CSF1R,CTNNB1,CTSD,CTSK,CYGB,CYP19A1,CYP1B1,CYP24A1,DCK,DHFR,DICER1,DNAJB4,DPYD,DUSP6,ECT2,EGFR,EIF4A1,EIF4E,ENG,ENO1,EPAS1,EPB41L4B,EPCAM,EPHA2,EPHB4,EPO,EPOR,ERBB3,E…	231
Respiratory Disease	non-small cell lung cancer	non-small cell lung cancer	2.87E-09			ABCB1,ABL1,ACTR10,ADAM17,AKT2,AKT3 (includes EG:10000),ALDH3A1,ALK,ANLN,AR,AURKA,AURKB,BIRC5,BRAF,BTRC,CA9,CACNA2D2,CASP8,CBLC,CCNA2,CCND1,CDA,CDCA8,CDH1,CDH13,CDK4,CDK6,CDKN1A,CDKN1B,CHRM1,CHRM4,CHRM5,CLCN3,CSF1 (includes EG:12977),CSF1R,CTNNB1,CTSD,CTSK,CYGB,CYP19A1,CYP1B1,CYP24A1,DCK,DHFR,DICER1,DNAJB4,DPYD,DUSP6,ECT2,EGFR,EIF4A1,EIF4E,ENG,ENO1,EPAS1,EPB41L4B,EPCAM,EPHA2,EPHB4,EPO,EPOR,ERBB3,E…	231
Skeletal and Muscular Disorders	arthritis	arthritis	3.08E-09		0.501	A2M,ABCB1,ABCB5,ABCC4 (includes EG:10257),ABO,Acan,ACER3,ACLY,ACMSD,ACO1,ACOT7,ACOX2,ACPP,ACSBG1,ACSL1,ACTA1,ACTL6A,ACVR1B,ADAM8,ADAMTS1,ADAMTS12,ADAMTS14,ADAMTS15,ADAMTS16,ADAMTS2,ADAMTS3,ADAMTS5,ADAMTS6,ADAMTS9,ADAP2,ADIPOR1,ADK,ADM,ADRA1B,ADRA1D,ADRA2A,ADRA2B,ADRB1,ADRB2,ADSS,AGBL3,AGER,AGPAT1,AHI1,AIF1 (includes EG:11629),AKR1A1,ALAS2,ALB,ALCAM,ALDH7A1,ALDOA,ALKBH8,ALOX12,ALOX5,ALOX5AP,ALPK2,…	1247
Connective Tissue Disorders	arthritis	arthritis	3.08E-09		0.501	A2M,ABCB1,ABCB5,ABCC4 (includes EG:10257),ABO,Acan,ACER3,ACLY,ACMSD,ACO1,ACOT7,ACOX2,ACPP,ACSBG1,ACSL1,ACTA1,ACTL6A,ACVR1B,ADAM8,ADAMTS1,ADAMTS12,ADAMTS14,ADAMTS15,ADAMTS16,ADAMTS2,ADAMTS3,ADAMTS5,ADAMTS6,ADAMTS9,ADAP2,ADIPOR1,ADK,ADM,ADRA1B,ADRA1D,ADRA2A,ADRA2B,ADRB1,ADRB2,ADSS,AGBL3,AGER,AGPAT1,AHI1,AIF1 (includes EG:11629),AKR1A1,ALAS2,ALB,ALCAM,ALDH7A1,ALDOA,ALKBH8,ALOX12,ALOX5,ALOX5AP,ALPK2,…	1247
Inflammatory Disease	arthritis	arthritis	3.08E-09		0.501	A2M,ABCB1,ABCB5,ABCC4 (includes EG:10257),ABO,Acan,ACER3,ACLY,ACMSD,ACO1,ACOT7,ACOX2,ACPP,ACSBG1,ACSL1,ACTA1,ACTL6A,ACVR1B,ADAM8,ADAMTS1,ADAMTS12,ADAMTS14,ADAMTS15,ADAMTS16,ADAMTS2,ADAMTS3,ADAMTS5,ADAMTS6,ADAMTS9,ADAP2,ADIPOR1,ADK,ADM,ADRA1B,ADRA1D,ADRA2A,ADRA2B,ADRB1,ADRB2,ADSS,AGBL3,AGER,AGPAT1,AHI1,AIF1 (includes EG:11629),AKR1A1,ALAS2,ALB,ALCAM,ALDH7A1,ALDOA,ALKBH8,ALOX12,ALOX5,ALOX5AP,ALPK2,…	1247
Cell Death	cell death	cell death of epithelial cell lines	3.24E-09		-0.260	ABCG2,ADRBK1,AIFM1,AIFM3,ALDH3A1,ALOX15,APP,ATF3,ATG5 (includes EG:11793),ATP13A2,ATP1A4,ATP2B2,BAD,BAG4,BCL10,BCL2A1,BCL2L1,BCL6,BECN1,BIRC3,BIRC5,BNIP3,BOK,CA3,CALB1,CASP2,CASP3,CASP7,CASP8,CASP9 (includes EG:100140945),CAT,CDH1,CDK6,CDKN1B,CEBPD,CFLAR,CHMP5,CLIC4,CNNM4,COX11,CRYAB,CSF1R,CUL7,CYCS,DAB2,DAP3,DAXX,DCTN2,DDIT3,DDN,DDX17,DECR1,DLST,E2F6,EIF2AK2,ELK1,EMP2,EMP3,EPHB2,ERN1,F2,FADD,FAS…	184
Molecular Transport	quantity	quantity of lipid	3.33E-09		1.841	ABCA1,ABCA3,ABCA7,ABCB1,ABCD1,ABCG1,ABCG2,ABCG5,ACACB,ACAT1,ACAT2,ACER1,ACLY,ACP6,ACPP,ACSL1,ADA,ADIPOR1,ADIPOR2,ADM,ADORA2A,ADRA2A,ADRB1,ADRB2,AFP,AGPAT2,AGPAT6,AGT,AHR,AKR1B1,AKT2,ALB,ALDH8A1,ALOX12,ALOX15,ALOX5,AMH,ANGPTL3,ANGPTL4,APOA1,APOA2,APOA4,APOC3,APOC4,APOD,APOE,APOM,APP,AR,ARNT,ASAH1,ATF3,ATP1A1,ATP2A2,ATP7B,ATP8B1,B3GNT5,B4GALNT1,B4GALT1,B4GALT2,BCMO1,BDNF,BMP7,BRCA1,BRMS1,C3,C5,CASP…	367
Lipid Metabolism	quantity	quantity of lipid	3.33E-09		1.841	ABCA1,ABCA3,ABCA7,ABCB1,ABCD1,ABCG1,ABCG2,ABCG5,ACACB,ACAT1,ACAT2,ACER1,ACLY,ACP6,ACPP,ACSL1,ADA,ADIPOR1,ADIPOR2,ADM,ADORA2A,ADRA2A,ADRB1,ADRB2,AFP,AGPAT2,AGPAT6,AGT,AHR,AKR1B1,AKT2,ALB,ALDH8A1,ALOX12,ALOX15,ALOX5,AMH,ANGPTL3,ANGPTL4,APOA1,APOA2,APOA4,APOC3,APOC4,APOD,APOE,APOM,APP,AR,ARNT,ASAH1,ATF3,ATP1A1,ATP2A2,ATP7B,ATP8B1,B3GNT5,B4GALNT1,B4GALT1,B4GALT2,BCMO1,BDNF,BMP7,BRCA1,BRMS1,C3,C5,CASP…	367
Small Molecule Biochemistry	quantity	quantity of lipid	3.33E-09		1.841	ABCA1,ABCA3,ABCA7,ABCB1,ABCD1,ABCG1,ABCG2,ABCG5,ACACB,ACAT1,ACAT2,ACER1,ACLY,ACP6,ACPP,ACSL1,ADA,ADIPOR1,ADIPOR2,ADM,ADORA2A,ADRA2A,ADRB1,ADRB2,AFP,AGPAT2,AGPAT6,AGT,AHR,AKR1B1,AKT2,ALB,ALDH8A1,ALOX12,ALOX15,ALOX5,AMH,ANGPTL3,ANGPTL4,APOA1,APOA2,APOA4,APOC3,APOC4,APOD,APOE,APOM,APP,AR,ARNT,ASAH1,ATF3,ATP1A1,ATP2A2,ATP7B,ATP8B1,B3GNT5,B4GALNT1,B4GALT1,B4GALT2,BCMO1,BDNF,BMP7,BRCA1,BRMS1,C3,C5,CASP…	367
Cancer	plasma cell dyscrasia	plasma cell dyscrasia	3.38E-09			ABL1,ADA,ADAM9,ADORA2A,AKAP5,AKT2,AKT3 (includes EG:10000),ALOX12B,AMY2A,ANXA11,ANXA4,ANXA6,APBA1,APBA3,ARHGAP1,ATP2B2,ATRN,BCAT1,BCLAF1,BCR,BRAF,CASP7,CASP8,CAV1,CBX2,CCND1,CCNDBP1,CD247,CD27,CD274,CD40,CDC20,CDC27,CDK1,CDK19,CDK2,CDK3,CDK4,CDK5,CDK6,CDK7,CHAF1A,CHEK2,CHRNB1,CHUK,CNTFR,COMT,CREBBP,CRP,CSF1R,CSF2RB,CTBP1,CTSL1,CXCR4,DHFR,DHX16,DIABLO,DIS3,E2F2,ECI2,EGFR,EPO,EPOR,F11R,FADD,FAS,FAS…	232
Hematological Disease	plasma cell dyscrasia	plasma cell dyscrasia	3.38E-09			ABL1,ADA,ADAM9,ADORA2A,AKAP5,AKT2,AKT3 (includes EG:10000),ALOX12B,AMY2A,ANXA11,ANXA4,ANXA6,APBA1,APBA3,ARHGAP1,ATP2B2,ATRN,BCAT1,BCLAF1,BCR,BRAF,CASP7,CASP8,CAV1,CBX2,CCND1,CCNDBP1,CD247,CD27,CD274,CD40,CDC20,CDC27,CDK1,CDK19,CDK2,CDK3,CDK4,CDK5,CDK6,CDK7,CHAF1A,CHEK2,CHRNB1,CHUK,CNTFR,COMT,CREBBP,CRP,CSF1R,CSF2RB,CTBP1,CTSL1,CXCR4,DHFR,DHX16,DIABLO,DIS3,E2F2,ECI2,EGFR,EPO,EPOR,F11R,FADD,FAS,FAS…	232
Immunological Disease	plasma cell dyscrasia	plasma cell dyscrasia	3.38E-09			ABL1,ADA,ADAM9,ADORA2A,AKAP5,AKT2,AKT3 (includes EG:10000),ALOX12B,AMY2A,ANXA11,ANXA4,ANXA6,APBA1,APBA3,ARHGAP1,ATP2B2,ATRN,BCAT1,BCLAF1,BCR,BRAF,CASP7,CASP8,CAV1,CBX2,CCND1,CCNDBP1,CD247,CD27,CD274,CD40,CDC20,CDC27,CDK1,CDK19,CDK2,CDK3,CDK4,CDK5,CDK6,CDK7,CHAF1A,CHEK2,CHRNB1,CHUK,CNTFR,COMT,CREBBP,CRP,CSF1R,CSF2RB,CTBP1,CTSL1,CXCR4,DHFR,DHX16,DIABLO,DIS3,E2F2,ECI2,EGFR,EPO,EPOR,F11R,FADD,FAS,FAS…	232
Cell Death	cell death	cell death of mononuclear leukocytes	3.74E-09		-0.067	ABL1,ADA,ADORA2A,ADRB1,AIFM1,AIMP1,AKTIP,APOE,ARRB1,ATG3 (includes EG:171415),ATM,BAD,BAK1,BCL10,BCL2A1,BCL2L1,BCL3,BIRC5,BLNK,BMF,BMP4,BRCA1,BTK,CAMP,CASP2,CASP3,CASP4,CASP7,CASP8,CASP9 (includes EG:100140945),CAV1,CCL25,CCL5,CCR8,CD247,CD27,CD274,CD3E,CD4,CD40,CD47,CD59 (includes EG:25407),CD9,CDK1,CDK2,CDKN1A,CFLAR,CHEK1,CHEK2,CHUK,CIITA,CSF2,CST3,CTNNB1,CTSB,CTSD,CXCR4,DDIT4,DEF6,DFFA,DICER1,…	230
Cell Death	cell death	cell death of lymphocytes	4.26E-09		-0.405	ABL1,ADA,ADORA2A,ADRB1,AIFM1,AIMP1,AKTIP,APOE,ARRB1,ATG3 (includes EG:171415),ATM,BAD,BAK1,BCL10,BCL2A1,BCL2L1,BCL3,BIRC5,BLNK,BMF,BMP4,BRCA1,BTK,CAMP,CASP2,CASP3,CASP4,CASP7,CASP8,CASP9 (includes EG:100140945),CAV1,CCL25,CCL5,CCR8,CD247,CD27,CD274,CD3E,CD4,CD40,CD47,CD59 (includes EG:25407),CD9,CDK1,CDK2,CDKN1A,CFLAR,CHEK1,CHEK2,CHUK,CIITA,CSF2,CST3,CTNNB1,CTSB,CTSD,CXCR4,DDIT4,DEF6,DFFA,DICER1,…	223
Cancer	malignant lymphocytic neoplasm	malignant lymphocytic neoplasm	4.52E-09		-0.288	ABCA7,ABL1,ADA,ADORA2A,AIMP1,AKT2,AKT3 (includes EG:10000),ALK,AMY2A,ATM,AURKB,BCL10,BCL2L1,BCL3,BCL6,BCR,BIRC5,BMI1,BRCA1,BRD2,BTG1,BTG2,CARD11,CARD9,CASP3,CCND1,CCND3,CCNH,CCR7,CD163,CD247,CD3D,CD3E,CD3G,CD40,CD58,CD8A,CDK2,CDK4,CDK6,CDK7,CDKN1A,CDKN1B,CDKN2C,CFLAR,CHEK1,CHUK,CIITA,CMIP,COL3A1,COL4A1,COL4A2,CREBBP,CRP,CSE1L,CSF2,CSF2RB,CSTF3,CXCL9,CXCR3,CXCR4,CYP1B1,CYR61,DCLRE1C,DCN,DDB2,DHFR,…	277
DNA Replication, Recombination, and Repair	double-stranded DNA break repair	double-stranded DNA break repair	4.57E-09	Decreased	-2.016	APBB1,APLF,APTX,ATM,BABAM1,BAZ1B,BLM,BMI1,BRCA1,BRCC3,BRE,CDCA5,CHEK2,CIB1,DCLRE1C,DDX1,ERCC1,EYA1,FAM175A,FEN1,FGF2,H2AFX,IL24,KAT5,KAT8,KPNA2,LIG4,MAD2L2,MRE11A,MSH2,NAE1,NBN,NR4A1,OBFC2A,OTUB1,PARP1,PCNA,PRKDC,PRPF19,RAD21,RAD54L,RAD9A,RBBP8,REV3L,RNF168,RNF8,SETMAR,SETX,SMAD3,SMARCA5,SOD1,TDP1 (includes EG:104884),TDP2,TERF2,TP53 (includes EG:22059),TRRAP,UBE2N,UIMC1,VCP,XPA,XRCC4,XRCC5,XRCC6	63
Nucleic Acid Metabolism	metabolism	metabolism of nucleic acid component or derivative	5.10E-09		1.816	ABCA1,ABCC1,ABCG5,ACAA2,ACACB,ACADSB,ACLY,ACOT12,ACOT4,ACOT9,ACPP,ACTC1,ADA,ADCY3,ADCY4,ADCY5,ADCY7,ADCY9,ADK,ADM,ADM2,ADNP,ADORA2A,ADORA2B,ADRA2A,ADRB1,ADRB2,ADRBK1,ADSL,ADSS,ADSSL1,AGPAT6,AGT,AHCY,AK1,AK2,AK3,AK5,AKAP12,AKAP5,ALDH2,ALDH6A1,ALDOA,AMPD3,ANGPT2,APOA1,APOE,APP,APRT,AQP1,ARR3 (includes EG:170735),ARRB1,ARRB2,ATIC,ATP1A1,ATP1A2,ATP2B2,ATP5A1,ATP5B,ATP5C1,ATP5D,ATP5F1,ATP5G1,ATP5H,ATP…	362
Cell Cycle	cytokinesis	cytokinesis	5.22E-09	Decreased	-2.781	AHCTF1,AKAP9,ANLN,ARL3,AURKA,AURKB,AURKC,BBS4,BECN1,BIRC5,CASC1,CCP110,CD2AP,CDC14A,CDC20,CDKN1A,CENPV,CEP55,CETN2,CFL1,CHMP3,CIT,CNTROB,CUL3 (includes EG:26554),DCTN3,DIAPH3,DSTN,ECT2,EIF3E,FMNL1,GADD45A,GNAI1,GNAI2,GNAI3,IGF1R,ITGB1,IVNS1ABP,KIF20A,KIF23,KIF4A,KIFC1,KLHL13,KLHL21,KLHL9,LATS2,LDLRAP1,LZTS2,MAP9,MASTL,MYH14,NEDD4L,NEK7,PDXP,PFN1,PIK3C3,PIM1,PIN1,PPP1CC,PRC1 (includes EG:233406),R…	90
Cellular Movement	cytokinesis	cytokinesis	5.22E-09	Decreased	-2.781	AHCTF1,AKAP9,ANLN,ARL3,AURKA,AURKB,AURKC,BBS4,BECN1,BIRC5,CASC1,CCP110,CD2AP,CDC14A,CDC20,CDKN1A,CENPV,CEP55,CETN2,CFL1,CHMP3,CIT,CNTROB,CUL3 (includes EG:26554),DCTN3,DIAPH3,DSTN,ECT2,EIF3E,FMNL1,GADD45A,GNAI1,GNAI2,GNAI3,IGF1R,ITGB1,IVNS1ABP,KIF20A,KIF23,KIF4A,KIFC1,KLHL13,KLHL21,KLHL9,LATS2,LDLRAP1,LZTS2,MAP9,MASTL,MYH14,NEDD4L,NEK7,PDXP,PFN1,PIK3C3,PIM1,PIN1,PPP1CC,PRC1 (includes EG:233406),R…	90
Cancer	lymphomagenesis	lymphomagenesis	5.75E-09		-0.288	ABCA7,ABL1,ADA,ADORA2A,AIMP1,AKT2,AKT3 (includes EG:10000),ALK,AMY2A,ATM,AURKB,BCL10,BCL2L1,BCL3,BCL6,BCR,BIRC5,BMI1,BRCA1,BRD2,BTG1,BTG2,CARD11,CARD9,CASP3,CCND1,CCND3,CCNH,CCR7,CD163,CD247,CD3D,CD3E,CD3G,CD40,CD58,CD8A,CDK2,CDK4,CDK6,CDK7,CDKN1A,CDKN1B,CDKN2C,CFLAR,CHEK1,CIITA,CMIP,COL3A1,COL4A1,COL4A2,CREBBP,CRP,CSE1L,CSF2,CSF2RB,CSTF3,CXCL9,CXCR3,CXCR4,CYP1B1,CYR61,DCLRE1C,DCN,DDB2,DHFR,DICER…	276
Hematological Disease	lymphomagenesis	lymphomagenesis	5.75E-09		-0.288	ABCA7,ABL1,ADA,ADORA2A,AIMP1,AKT2,AKT3 (includes EG:10000),ALK,AMY2A,ATM,AURKB,BCL10,BCL2L1,BCL3,BCL6,BCR,BIRC5,BMI1,BRCA1,BRD2,BTG1,BTG2,CARD11,CARD9,CASP3,CCND1,CCND3,CCNH,CCR7,CD163,CD247,CD3D,CD3E,CD3G,CD40,CD58,CD8A,CDK2,CDK4,CDK6,CDK7,CDKN1A,CDKN1B,CDKN2C,CFLAR,CHEK1,CIITA,CMIP,COL3A1,COL4A1,COL4A2,CREBBP,CRP,CSE1L,CSF2,CSF2RB,CSTF3,CXCL9,CXCR3,CXCR4,CYP1B1,CYR61,DCLRE1C,DCN,DDB2,DHFR,DICER…	276
Cell Cycle	G2 phase	G2 phase	6.42E-09		-0.913	ABCB1,ABL1,ANAPC10,ANAPC4,ANAPC5,APP,AR,ATF2,ATF5,ATM,ATR,AURKA,BABAM1,BIRC5,BLM,BMP7,BRCA1,BRCC3,BRE,BRSK1,BRSK2,CAMK2A,CCNA2,CCND1,CCNG2,CDC14B,CDC25A,CDC25B,CDC25C,CDC5L,CDH13,CDK1,CDK2,CDKN1A,CDKN2B,CENPF,CHEK1,CHEK2,CIT,CKS1B,CLSPN,CREM,CSE1L,CSNK2A1,CTNNB1,DNAJC2,DPP4,EGFR,EIF2AK2,ELAC2,ERCC1,FADD,FAM175A,FANCC,FASN,FHIT,FLNA,FOXM1,FOXO4,GADD45A,GADD45B,GADD45G,GMNN,GORASP2,GPC1,GRB10,H2AFX…	154
Immunological Disease	autoimmune disease	autoimmune disease	7.70E-09		-0.156	A2M,ABCA1,ABCA10,ABCB1,ABCB5,ABCB9,ABCC1,ABCC4 (includes EG:10257),ABCC8,ABCG1,ABCG2,ABHD16A,ABHD2,ABO,ABT1,ACACB,ACAD10,ACER3,ACLY,ACMSD,ACO1,ACOT7,ACOX2,ACPP,ACSBG1,ACSL1,ACTA1,ACTB,ACTL6A,ACTN4,ACVR1B,ADAM8,ADAMTS2,ADAMTS3,ADAMTS5,ADAMTS6,ADAP2,ADIPOR1,ADK,ADM,ADORA2A,ADRA1B,ADRA1D,ADRA2A,ADRA2B,ADRB1,ADRB2,ADSS,AGBL3,AGER,AGPAT1,AGT,AHI1,AHR,AIF1 (includes EG:11629),AIMP2,AK5,AKAP7,AKR1A1,ALA…	1637
Cell Cycle	G1 phase	G1 phase of tumor cell lines	8.06E-09		-1.314	ACIN1,AHR,AMH,APC,ARRB1,ATM,BAD,BHLHE40,BMP2,BMP7,BRAF,BRCA1,BTG2,BTRC,C9,CAMK1,CAMKK1,CAMKK2,CASP3,CCND1,CCND3,CCNE1,CCNG2,CD40,CDC25A,CDC25B,CDC25C,CDK2,CDK4,CDK5RAP3,CDK6,CDKN1A,CDKN1B,CDKN1C,CDKN2B,COPS2,CREG1,CREM,CSF2,CYR61,DARS,DAXX,DCN,DDIT3,DTD1,DUSP1,DYRK1B,EGFR,ELAVL1,EPB41L1,EPO,ERBB3,ESR2,ESRRA,ESRRG,ETS1,EZH2,FASN,FGF2,FOXM1,FOXO1 (includes EG:2308),GDF15,GFI1,GJA1,GNL3,GPS2,GSK3B,G…	139
Molecular Transport	transport	transport of protein	8.78E-09		-1.494	ABCB9,ACD,ADRB2,AKTIP,AP1B1,AP1G1,AP1G2,AP1M2,AP2A2,AP2M1,AP3B1,AP3D1,AP3S2,AP4B1,AP4M1,AP4S1,APBA1,APPBP2,Arf2,ARF5,ARFGAP1,ARFIP1,ARNTL,ASPSCR1,BCL3,BCL6,BLZF1,C14orf133,CALR,CASK,CASP9 (includes EG:100140945),CAV1,CCHCR1,CCT6B,CD3G,CDK5,CENPF,CEP290,CEP57,CFL1,CHIC2,CHMP3,CHMP5,CHMP7,COG2 (includes EG:22796),COL1A1,CRY2,CTSA,DYNLT1,ECT2,EIF2D,EIF4ENIF1,EIF5A,ERP29,FAM160A2,FLNA,GABARAP,GAPVD1,…	194
Protein Trafficking	transport	transport of protein	8.78E-09		-1.494	ABCB9,ACD,ADRB2,AKTIP,AP1B1,AP1G1,AP1G2,AP1M2,AP2A2,AP2M1,AP3B1,AP3D1,AP3S2,AP4B1,AP4M1,AP4S1,APBA1,APPBP2,Arf2,ARF5,ARFGAP1,ARFIP1,ARNTL,ASPSCR1,BCL3,BCL6,BLZF1,C14orf133,CALR,CASK,CASP9 (includes EG:100140945),CAV1,CCHCR1,CCT6B,CD3G,CDK5,CENPF,CEP290,CEP57,CFL1,CHIC2,CHMP3,CHMP5,CHMP7,COG2 (includes EG:22796),COL1A1,CRY2,CTSA,DYNLT1,ECT2,EIF2D,EIF4ENIF1,EIF5A,ERP29,FAM160A2,FLNA,GABARAP,GAPVD1,…	194
Cancer	leukemia	leukemia	8.80E-09		-0.806	ABCB1,ABCC1,ABCG2,ABL1,ACHE,ADA,ADORA2A,ADORA2B,AKT2,AKT3 (includes EG:10000),ALAD,ALDH5A1,ALOX5,AMY2A,ARHGAP26,ARL11,ASXL1,ATM,AURKA,AURKB,AXL,BAALC,BAK1,BCL2L1,BCL3,BCL6,BCR,BLNK,BRAF,C12orf5,C5,CBFB,CBL,CCND1,CD14,CD1A,CD247,CD27,CD3D,CD3E,CD3G,CD40,CD55,CD59 (includes EG:25407),CD80 (includes EG:12519),CD86,CDK1,CDK19,CDK2,CDK3,CDK4,CDK5,CDK6,CDK7,CDKL3,CDKN1A,CDKN2B,CHEK1,CHIC2,CHRNA1,CHRNA1…	302
Hematological Disease	leukemia	leukemia	8.80E-09		-0.806	ABCB1,ABCC1,ABCG2,ABL1,ACHE,ADA,ADORA2A,ADORA2B,AKT2,AKT3 (includes EG:10000),ALAD,ALDH5A1,ALOX5,AMY2A,ARHGAP26,ARL11,ASXL1,ATM,AURKA,AURKB,AXL,BAALC,BAK1,BCL2L1,BCL3,BCL6,BCR,BLNK,BRAF,C12orf5,C5,CBFB,CBL,CCND1,CD14,CD1A,CD247,CD27,CD3D,CD3E,CD3G,CD40,CD55,CD59 (includes EG:25407),CD80 (includes EG:12519),CD86,CDK1,CDK19,CDK2,CDK3,CDK4,CDK5,CDK6,CDK7,CDKL3,CDKN1A,CDKN2B,CHEK1,CHIC2,CHRNA1,CHRNA1…	302
Cellular Development	developmental process	developmental process of lymphocytes	9.23E-09		1.846	ABL1,ADA,ADAM10,ADAM17,AFF1,AHR,AKT2,AP3B1,AP3D1,APC,APP,ATM,ATP7A,AXL,BAD,BCL2A1,BCL2L1,BCL3,BCL6,BCR,BIRC5,BLM,BLNK,BMI1,BMP4,BRCA1,BST1 (includes EG:12182),BTK,C3,CALCB,CARD11,CBFB,CBL,CBX2,CCL25,CCND3,CCR6,CCR7,CD14,CD180,CD244,CD247,CD27,CD274,CD3D,CD3E,CD3G,CD4,CD40,CD72,CD80 (includes EG:12519),CD83,CD86,CD8A,CDK2,CDKN1A,CDKN1B,CHD4,CHD7,CHEK1,CHUK,CREB1,CREBBP,CRTC2,CSF2,CSK,CTNNB1,CXCR4,…	377
Tissue Development	formation	formation of connective tissue	9.32E-09		-0.015	ACD,ACP2,ACP5,ACVR2B,ADAMTS4,ADK,ADORA2A,AKT2,ALDH1A1,ALPL,ANKRD11,APC,ARSB,ARSE,ATF4,BGLAP,BGN,BMI1,BMP2,BMP3,BMP4,BMP6,BMP7,BMPR1A,BMPR1B,C10orf58,C3,C3AR1,C5,CA2,CALCB,CAPNS1,CBX2,CCL5,CCND1,CD276,CD47,CHD7,CHRD,CHST3,CHUK,CLEC3B,COL10A1,COL11A1,COL11A2,COL1A1,COL1A2,COL9A2,COMP,CREBBP,CSF1 (includes EG:12977),CSF1R,CSF2,CSK,CSRNP1,CTGF,CTNNB1,CTNNBIP1,CYP26A1,DCN,DICER1,DLL3,DLX5,DLX6,DSPP,EB…	291
Gene Expression	binding	binding of DNA	1.29E-08		0.649	ADIPOR1,ADRB2,AGT,AHR,AIMP1,AKT2,ALB,AMH,ANXA7,APOH,APP,AR,ARNT,ATM,BCAT2,BCL10,BMP2,BMP7,BRCA1,BRF2,BTG2,BTK,BTRC,CALR,CASD1,CAV1,CBFB,CCND1,CD101,CD4,CD40,CDK1,CDKN1A,CEBPE,CFL1,CFLAR,CHUK,CISH,CLU,CREB1,CREM,CSF2,CUL4A,CYP1A1,CYP1B1,CYP2B6,CYP2C9,CYP3A4,CYSLTR2,DDB2,DDIT3,DIRAS3,DMAP1,DNAJB1,DUSP26,E2F1,EBF1,EDN1,EGFR,EGR1,ELF4,EPAS1,EPO,EPOR,ERCC5,ERF,ESR2,ESRRA,ETS1,ETS2,ETV3,EZH2,F2,FADD,FA…	314
Cell Death	survival	survival of cervical cancer cell lines	1.35E-08		0.950	ACVR2A,ACVR2B,ADK,AK5,AKAP5,AKAP7,AKAP8L,AKT2,ALPK2,ATM,ATP7B,ATR,AURKAIP1,BCL2A1,BIRC5,BRCA1,BUB1B,CAMK1G,CAMK2D,CASK,CAV1,CDC42BPA,CDK20,CDK6,CDKL3,CHEK1,CHEK2,CHKA,CLK3,CLU,DGKA,DUSP10,DUSP12,DUSP14,DUSP19,DUSP6,DUSP7,DYRK1B,DYRK3,EIF2AK4,FER,FGR,FN3K,GRK4,INPP1,INPP5A,INPP5B,INPP5K,KAT5,KHK,KITLG,LAMTOR3,LATS2,LCK,MAP3K1,MAP3K4,MAPK15,MINPP1,MPG,MTMR1,MTMR6,MTMR7,NBN,NEK8,NLK,PARP1,PDP1,PFKFB…	132
Hematological System Development and Function	quantity	quantity of leukocytes	1.68E-08	Increased	2.404	ABCA1,ABCG2,ACAT1,ACHE,ADA,ADORA2A,AFF1,AGER,AGT,AHR,ALOX5,AMBP,ANK2,APOA1,APOE,APP,ATF3,ATM,B4GALNT1,BAD,BCL10,BCL2A1,BCL2L1,BDNF,BIRC5,BLM,BLNK,BMI1,BST1 (includes EG:12182),BTK,C1QA,C3,CAMP,CARD11,CARM1,CASP8,CBFB,CBS,CCL22,CCL28,CCL5,CCR6,CCR7,CD180,CD200,CD244,CD247,CD27,CD274,CD3D,CD3E,CD3G,CD4,CD40,CD47,CD72,CD80 (includes EG:12519),CD83,CD86,CD8A,CDKN1A,CDKN1B,CES1,CFLAR,CHRNA1,CHST1,CHST…	399
Tissue Morphology	quantity	quantity of leukocytes	1.68E-08	Increased	2.404	ABCA1,ABCG2,ACAT1,ACHE,ADA,ADORA2A,AFF1,AGER,AGT,AHR,ALOX5,AMBP,ANK2,APOA1,APOE,APP,ATF3,ATM,B4GALNT1,BAD,BCL10,BCL2A1,BCL2L1,BDNF,BIRC5,BLM,BLNK,BMI1,BST1 (includes EG:12182),BTK,C1QA,C3,CAMP,CARD11,CARM1,CASP8,CBFB,CBS,CCL22,CCL28,CCL5,CCR6,CCR7,CD180,CD200,CD244,CD247,CD27,CD274,CD3D,CD3E,CD3G,CD4,CD40,CD47,CD72,CD80 (includes EG:12519),CD83,CD86,CD8A,CDKN1A,CDKN1B,CES1,CFLAR,CHRNA1,CHST1,CHST…	399
Cell Cycle	senescence	senescence of cells	1.71E-08		0.800	ACLY,AGT,AHCY,AKR1B1,ARID3A,ATM,ATR,BCL2L12,BCL6,BHLHE40,BLM,BMI1,BMP4,BRCA1,BRD7,BRF1 (includes EG:2972),BUB1 (includes EG:100307076),BUB3 (includes EG:12237),CASP3,CAT,CAV1,CBX2,CBX7,CDC14B,CDK2,CDK4,CDKN1A,CDKN1B,CDKN1C,CDKN2B,CHEK2,CHRDL1,CIRBP,COPS2,CPEB1,CSNK2A1,CSNK2A2,CTNNB1,DDB2,DEK,DICER1,DMTF1,DNMT3B,DUSP1,E2F1,EGFR,EGR1,EHF,EIF4E,ELF4,EWSR1,FASN,FGF2,FOXM1,GADD45A,GPI,HDAC2,HELLS,HIF1…	107
Lipid Metabolism	metabolism	metabolism of phospholipid	1.86E-08		1.817	ABHD5,ACSL5,ACSL6,AGK,AGPAT1,AGPAT2,AGPAT6,ANGPTL3,APOA1,APOA2,APOA4,ASPG,C5,CD40,CDIPT,CEPT1,CERS5,CES1,CHKA,CHKB,CHPT1,CLN8,CSF2,CYP7A1,DGKE,EDN1,ETNK2,F2,FABP3,FADS1,FASN,FCGR2B,FGF7,FIG4,FLT1,GALR2,GAPVD1,GPAM,GRP,HEXB,HMOX1,HTR2A,HTR2B,IL1B,IL8,IMPA1,INPP5E,ITGB1,KDR,LCAT,LPCAT1,LPCAT2,LPL,LRAT,LYN,LYST,MECP2,MTOR,MYD88,NAPEPLD,NCS1,NGF,NOX1,NTRK1,OSBP,PCYT1A,PCYT1B,PCYT2,PDGFA,PDGFRB,PEMT,P…	140
Small Molecule Biochemistry	metabolism	metabolism of phospholipid	1.86E-08		1.817	ABHD5,ACSL5,ACSL6,AGK,AGPAT1,AGPAT2,AGPAT6,ANGPTL3,APOA1,APOA2,APOA4,ASPG,C5,CD40,CDIPT,CEPT1,CERS5,CES1,CHKA,CHKB,CHPT1,CLN8,CSF2,CYP7A1,DGKE,EDN1,ETNK2,F2,FABP3,FADS1,FASN,FCGR2B,FGF7,FIG4,FLT1,GALR2,GAPVD1,GPAM,GRP,HEXB,HMOX1,HTR2A,HTR2B,IL1B,IL8,IMPA1,INPP5E,ITGB1,KDR,LCAT,LPCAT1,LPCAT2,LPL,LRAT,LYN,LYST,MECP2,MTOR,MYD88,NAPEPLD,NCS1,NGF,NOX1,NTRK1,OSBP,PCYT1A,PCYT1B,PCYT2,PDGFA,PDGFRB,PEMT,P…	140
Post-Translational Modification	activation	activation of Protein kinase	2.09E-08			ADAM9,ADORA2A,ADORA2B,ADRA2B,AKT1S1,ALK,ALS2,APC,ARRB1,AVPI1,AXIN1,BMP4,C1QTNF2,C5,CAMKK1,CASP3,CAV3,CD4,CDC25B,CDK5,CDK5RAP1,CDKN1A,CDKN1B,CHRM1,CHRNA7,CISH,CRK,CSF1 (includes EG:12977),CSPG4,CXCR4,DAB2IP,DAXX,DBNDD2,DBNL,DEPTOR,DGKG,DGKH,DNAJA3,DNAJC3,DVL1,EDN1,EDN2,EDNRA,EFNA1,EGFR,EPHA1,ERCC6,F2R,FABP4,FCER1A,FGD4,FGF2,FGFR1OP,FLT1,FRS2,GAB1,GADD45A,GADD45B,GADD45G,GHR,GNAI2,GNB2L1,GNG3,GSTP1…	164
Cell Signaling	activation	activation of Protein kinase	2.09E-08			ADAM9,ADORA2A,ADORA2B,ADRA2B,AKT1S1,ALK,ALS2,APC,ARRB1,AVPI1,AXIN1,BMP4,C1QTNF2,C5,CAMKK1,CASP3,CAV3,CD4,CDC25B,CDK5,CDK5RAP1,CDKN1A,CDKN1B,CHRM1,CHRNA7,CISH,CRK,CSF1 (includes EG:12977),CSPG4,CXCR4,DAB2IP,DAXX,DBNDD2,DBNL,DEPTOR,DGKG,DGKH,DNAJA3,DNAJC3,DVL1,EDN1,EDN2,EDNRA,EFNA1,EGFR,EPHA1,ERCC6,F2R,FABP4,FCER1A,FGD4,FGF2,FGFR1OP,FLT1,FRS2,GAB1,GADD45A,GADD45B,GADD45G,GHR,GNAI2,GNB2L1,GNG3,GSTP1…	164
Cell Death	cell death	cell death of prostate cancer cell lines	2.24E-08	Increased	3.033	ABCE1,ABL1,ADI1 (includes EG:104923),AGR2,AIFM1,ALOX12,ALOX5,AR,ATM,BAD,BAK1,BCL2L1,BECN1,BIRC3,BIRC5,BMP2,BMP7,BMX,BRCA1,CALR,CASP3,CASP7,CASP8,CASP9 (includes EG:100140945),CAT,CAV1,CDK5,CDK5R1,CFLAR,CLU,COX5A (includes EG:12858),CREB1,DDIT3,DIABLO,DIRAS3,DKK3,E2F1,EDN1,EGFR,EGR1,EHF,ENTPD5,ETS2,FADD,FAS,FASN,FDFT1,FOS,FOXO1 (includes EG:2308),FOXO3,FST,GADD45A,GADD45G,GDF15,GLIPR1,GSK3B,HBEGF,…	125
Cell Death	apoptosis	apoptosis of T lymphocytes	2.37E-08		-0.136	ABL1,ADA,ADORA2A,ADRB1,AKTIP,APOE,ARRB1,ATM,BAK1,BCL10,BCL2L1,BMP4,BRCA1,CASP3,CASP7,CASP8,CASP9 (includes EG:100140945),CAV1,CCL25,CCL5,CCR8,CD247,CD27,CD274,CD3E,CD4,CD47,CD59 (includes EG:25407),CD9,CDK2,CDKN1A,CFLAR,CHEK1,CHEK2,CHUK,CIITA,CTNNB1,CXCR4,DFFA,DICER1,DLL4,DNAJA3,E2F1,E2F2,EGR1,EGR3,ETS2,EZR,FAIM3,FAS,FBXW7,FCGR1A,FOS,FYN,GPAM,GPR132,GSK3B,GZMA,HIST1H1C,HOXA3,ICAM1,ID3 (includes E…	155
Cellular Development	differentiation	differentiation of red blood cells	2.41E-08	Increased	2.287	ABL1,ACVR1B,ACVR2A,ADD1,AHSP,ALAS2,AXL,BCL2L1,BCR,BMP4,CDK6,CSF2,CTCF (includes EG:10664),DNASE2,DYRK3,EGFR,EPAS1,EPO,EPOR,ETS1,ETV2,ETV6,FAS,FLI1,FLVCR1,FOXO3,GATA1,GATA2,GATA3,GFI1B,GNA15,HCLS1,HIF1A,HMGB2,HOXA5,ID2,INHBA,INPP5D,JAK2,JUNB,KDM1A,LCN2,LDB1,LMO2,LOC643751,LYN,MAFB,MAPK14,MAX,MED1 (includes EG:19014),MERTK,MIF,MLL5,MYB,MYC,NCKAP1L,PALLD,PKNOX1,PLCB1,PRKCA,PTPN1,PTPRC,RB1,RCOR1,RPS1…	82
Hematological System Development and Function	differentiation	differentiation of red blood cells	2.41E-08	Increased	2.287	ABL1,ACVR1B,ACVR2A,ADD1,AHSP,ALAS2,AXL,BCL2L1,BCR,BMP4,CDK6,CSF2,CTCF (includes EG:10664),DNASE2,DYRK3,EGFR,EPAS1,EPO,EPOR,ETS1,ETV2,ETV6,FAS,FLI1,FLVCR1,FOXO3,GATA1,GATA2,GATA3,GFI1B,GNA15,HCLS1,HIF1A,HMGB2,HOXA5,ID2,INHBA,INPP5D,JAK2,JUNB,KDM1A,LCN2,LDB1,LMO2,LOC643751,LYN,MAFB,MAPK14,MAX,MED1 (includes EG:19014),MERTK,MIF,MLL5,MYB,MYC,NCKAP1L,PALLD,PKNOX1,PLCB1,PRKCA,PTPN1,PTPRC,RB1,RCOR1,RPS1…	82
Hematopoiesis	differentiation	differentiation of red blood cells	2.41E-08	Increased	2.287	ABL1,ACVR1B,ACVR2A,ADD1,AHSP,ALAS2,AXL,BCL2L1,BCR,BMP4,CDK6,CSF2,CTCF (includes EG:10664),DNASE2,DYRK3,EGFR,EPAS1,EPO,EPOR,ETS1,ETV2,ETV6,FAS,FLI1,FLVCR1,FOXO3,GATA1,GATA2,GATA3,GFI1B,GNA15,HCLS1,HIF1A,HMGB2,HOXA5,ID2,INHBA,INPP5D,JAK2,JUNB,KDM1A,LCN2,LDB1,LMO2,LOC643751,LYN,MAFB,MAPK14,MAX,MED1 (includes EG:19014),MERTK,MIF,MLL5,MYB,MYC,NCKAP1L,PALLD,PKNOX1,PLCB1,PRKCA,PTPN1,PTPRC,RB1,RCOR1,RPS1…	82
Tissue Development	formation	formation of bone	2.54E-08		-0.175	ACD,ACP2,ACP5,ACVR2B,ADAMTS4,ADK,AKT2,ALDH1A1,ALPL,ANKRD11,APC,ARSB,ARSE,ATF4,BGLAP,BGN,BMI1,BMP2,BMP3,BMP4,BMP6,BMP7,BMPR1A,BMPR1B,C10orf58,C3,C3AR1,C5,CA2,CALCB,CAPNS1,CBX2,CCL5,CCND1,CD276,CD47,CHD7,CHRD,CHUK,CLEC3B,COL10A1,COL11A1,COL11A2,COL1A1,COL1A2,COL9A2,COMP,CREBBP,CSF1 (includes EG:12977),CSF1R,CSF2,CSK,CSRNP1,CTGF,CTNNB1,CTNNBIP1,CYP26A1,DCN,DICER1,DLL3,DLX5,DLX6,DSPP,EBP,EDN1,EDNRA,E…	282
Connective Tissue Development and Function	formation	formation of bone	2.54E-08		-0.175	ACD,ACP2,ACP5,ACVR2B,ADAMTS4,ADK,AKT2,ALDH1A1,ALPL,ANKRD11,APC,ARSB,ARSE,ATF4,BGLAP,BGN,BMI1,BMP2,BMP3,BMP4,BMP6,BMP7,BMPR1A,BMPR1B,C10orf58,C3,C3AR1,C5,CA2,CALCB,CAPNS1,CBX2,CCL5,CCND1,CD276,CD47,CHD7,CHRD,CHUK,CLEC3B,COL10A1,COL11A1,COL11A2,COL1A1,COL1A2,COL9A2,COMP,CREBBP,CSF1 (includes EG:12977),CSF1R,CSF2,CSK,CSRNP1,CTGF,CTNNB1,CTNNBIP1,CYP26A1,DCN,DICER1,DLL3,DLX5,DLX6,DSPP,EBP,EDN1,EDNRA,E…	282
Skeletal and Muscular System Development and Function	formation	formation of bone	2.54E-08		-0.175	ACD,ACP2,ACP5,ACVR2B,ADAMTS4,ADK,AKT2,ALDH1A1,ALPL,ANKRD11,APC,ARSB,ARSE,ATF4,BGLAP,BGN,BMI1,BMP2,BMP3,BMP4,BMP6,BMP7,BMPR1A,BMPR1B,C10orf58,C3,C3AR1,C5,CA2,CALCB,CAPNS1,CBX2,CCL5,CCND1,CD276,CD47,CHD7,CHRD,CHUK,CLEC3B,COL10A1,COL11A1,COL11A2,COL1A1,COL1A2,COL9A2,COMP,CREBBP,CSF1 (includes EG:12977),CSF1R,CSF2,CSK,CSRNP1,CTGF,CTNNB1,CTNNBIP1,CYP26A1,DCN,DICER1,DLL3,DLX5,DLX6,DSPP,EBP,EDN1,EDNRA,E…	282
Lipid Metabolism	oxidation	oxidation of fatty acid	2.63E-08		1.055	ABCD1,ABCD3,ABHD5,ACAA2,ACACB,ACADL,ACADM,ACADS,ACADSB,ACADVL,ACOX1,ACOX2,ACOX3,ACSL1,ACSL3,ACSL4,ACSL5,ACSL6,ADH1C (includes EG:11522),ADIPOR1,ADIPOR2,AKT2,ALOX12,APOA1,APOA2,APOE,APPL1,BDH2 (includes EG:295458),C1QTNF2,C3,CD36,CPT1A,CPT1B,CPT1C,CPT2,CYP19A1,CYP2C9,CYP3A4,DECR1,ECHS1,ECI1,ECI2,EHHADH,EPAS1,ESRRA,FABP2,FABP3,GCDH,GOT2,GPAM,HACL1,HADH,HADHA,HADHB,HAO2,HPGD,HSD11B1,HSD17B4,IDE,IL6,…	100
Small Molecule Biochemistry	oxidation	oxidation of fatty acid	2.63E-08		1.055	ABCD1,ABCD3,ABHD5,ACAA2,ACACB,ACADL,ACADM,ACADS,ACADSB,ACADVL,ACOX1,ACOX2,ACOX3,ACSL1,ACSL3,ACSL4,ACSL5,ACSL6,ADH1C (includes EG:11522),ADIPOR1,ADIPOR2,AKT2,ALOX12,APOA1,APOA2,APOE,APPL1,BDH2 (includes EG:295458),C1QTNF2,C3,CD36,CPT1A,CPT1B,CPT1C,CPT2,CYP19A1,CYP2C9,CYP3A4,DECR1,ECHS1,ECI1,ECI2,EHHADH,EPAS1,ESRRA,FABP2,FABP3,GCDH,GOT2,GPAM,HACL1,HADH,HADHA,HADHB,HAO2,HPGD,HSD11B1,HSD17B4,IDE,IL6,…	100
Energy Production	oxidation	oxidation of fatty acid	2.63E-08		1.055	ABCD1,ABCD3,ABHD5,ACAA2,ACACB,ACADL,ACADM,ACADS,ACADSB,ACADVL,ACOX1,ACOX2,ACOX3,ACSL1,ACSL3,ACSL4,ACSL5,ACSL6,ADH1C (includes EG:11522),ADIPOR1,ADIPOR2,AKT2,ALOX12,APOA1,APOA2,APOE,APPL1,BDH2 (includes EG:295458),C1QTNF2,C3,CD36,CPT1A,CPT1B,CPT1C,CPT2,CYP19A1,CYP2C9,CYP3A4,DECR1,ECHS1,ECI1,ECI2,EHHADH,EPAS1,ESRRA,FABP2,FABP3,GCDH,GOT2,GPAM,HACL1,HADH,HADHA,HADHB,HAO2,HPGD,HSD11B1,HSD17B4,IDE,IL6,…	100
Cellular Development	developmental process	developmental process of red blood cells	2.76E-08	Increased	3.469	ABL1,ACVR1B,ACVR2A,ADAR,ADD1,AHSP,ALAS2,AXL,BCL2L1,BCL6,BCR,BMP4,BTK,CD163,CDK6,CDKN1A,CDKN1B,CITED2,CSF2,CTCF (includes EG:10664),DNASE2,DYRK3,E2F2,E2F4,EGFR,EIF2AK2,EIF2C2,EPAS1,EPO,EPOR,ERCC2,ETS1,ETV2,ETV6,FAS,FLI1,FLVCR1,FOXO3,G6PD,GATA1,GATA2,GATA3,GFI1B,GNA15,HBZ,HCLS1,HIF1A,HIPK2,HMGB2,HOXA5,ID2,IFNAR1,IL4 (includes EG:16189),IL6,IL6R,IL6ST,INHBA,INPP5D,JAK2,JMJD6,JUNB,KDM1A,KIT,KITLG,KLF…	117
Hematological System Development and Function	developmental process	developmental process of red blood cells	2.76E-08	Increased	3.469	ABL1,ACVR1B,ACVR2A,ADAR,ADD1,AHSP,ALAS2,AXL,BCL2L1,BCL6,BCR,BMP4,BTK,CD163,CDK6,CDKN1A,CDKN1B,CITED2,CSF2,CTCF (includes EG:10664),DNASE2,DYRK3,E2F2,E2F4,EGFR,EIF2AK2,EIF2C2,EPAS1,EPO,EPOR,ERCC2,ETS1,ETV2,ETV6,FAS,FLI1,FLVCR1,FOXO3,G6PD,GATA1,GATA2,GATA3,GFI1B,GNA15,HBZ,HCLS1,HIF1A,HIPK2,HMGB2,HOXA5,ID2,IFNAR1,IL4 (includes EG:16189),IL6,IL6R,IL6ST,INHBA,INPP5D,JAK2,JMJD6,JUNB,KDM1A,KIT,KITLG,KLF…	117
Hematopoiesis	developmental process	developmental process of red blood cells	2.76E-08	Increased	3.469	ABL1,ACVR1B,ACVR2A,ADAR,ADD1,AHSP,ALAS2,AXL,BCL2L1,BCL6,BCR,BMP4,BTK,CD163,CDK6,CDKN1A,CDKN1B,CITED2,CSF2,CTCF (includes EG:10664),DNASE2,DYRK3,E2F2,E2F4,EGFR,EIF2AK2,EIF2C2,EPAS1,EPO,EPOR,ERCC2,ETS1,ETV2,ETV6,FAS,FLI1,FLVCR1,FOXO3,G6PD,GATA1,GATA2,GATA3,GFI1B,GNA15,HBZ,HCLS1,HIF1A,HIPK2,HMGB2,HOXA5,ID2,IFNAR1,IL4 (includes EG:16189),IL6,IL6R,IL6ST,INHBA,INPP5D,JAK2,JMJD6,JUNB,KDM1A,KIT,KITLG,KLF…	117
Skeletal and Muscular Disorders	rheumatoid arthritis	rheumatoid arthritis	2.87E-08		-0.665	A2M,ABCB1,ABCB5,ABCC4 (includes EG:10257),ABO,ACER3,ACLY,ACMSD,ACO1,ACOT7,ACOX2,ACPP,ACSBG1,ACSL1,ACTA1,ACTL6A,ACVR1B,ADAM8,ADAMTS2,ADAMTS3,ADAMTS6,ADAP2,ADIPOR1,ADK,ADM,ADRA1B,ADRB2,ADSS,AGBL3,AGER,AGPAT1,AHI1,AIF1 (includes EG:11629),AKR1A1,ALAS2,ALB,ALCAM,ALDH7A1,ALDOA,ALKBH8,ALOX12,ALOX5,ALPK2,ALPL,AMFR,AMPD3,ANAPC4,ANG,ANGPT1,ANGPTL2,ANKFY1,ANKRD12,ANKRD28,ANKS1A,ANTXR1,ANXA5,AP3D1,AP3S2,AP4…	1095
Connective Tissue Disorders	rheumatoid arthritis	rheumatoid arthritis	2.87E-08		-0.665	A2M,ABCB1,ABCB5,ABCC4 (includes EG:10257),ABO,ACER3,ACLY,ACMSD,ACO1,ACOT7,ACOX2,ACPP,ACSBG1,ACSL1,ACTA1,ACTL6A,ACVR1B,ADAM8,ADAMTS2,ADAMTS3,ADAMTS6,ADAP2,ADIPOR1,ADK,ADM,ADRA1B,ADRB2,ADSS,AGBL3,AGER,AGPAT1,AHI1,AIF1 (includes EG:11629),AKR1A1,ALAS2,ALB,ALCAM,ALDH7A1,ALDOA,ALKBH8,ALOX12,ALOX5,ALPK2,ALPL,AMFR,AMPD3,ANAPC4,ANG,ANGPT1,ANGPTL2,ANKFY1,ANKRD12,ANKRD28,ANKS1A,ANTXR1,ANXA5,AP3D1,AP3S2,AP4…	1095
Inflammatory Disease	rheumatoid arthritis	rheumatoid arthritis	2.87E-08		-0.665	A2M,ABCB1,ABCB5,ABCC4 (includes EG:10257),ABO,ACER3,ACLY,ACMSD,ACO1,ACOT7,ACOX2,ACPP,ACSBG1,ACSL1,ACTA1,ACTL6A,ACVR1B,ADAM8,ADAMTS2,ADAMTS3,ADAMTS6,ADAP2,ADIPOR1,ADK,ADM,ADRA1B,ADRB2,ADSS,AGBL3,AGER,AGPAT1,AHI1,AIF1 (includes EG:11629),AKR1A1,ALAS2,ALB,ALCAM,ALDH7A1,ALDOA,ALKBH8,ALOX12,ALOX5,ALPK2,ALPL,AMFR,AMPD3,ANAPC4,ANG,ANGPT1,ANGPTL2,ANKFY1,ANKRD12,ANKRD28,ANKS1A,ANTXR1,ANXA5,AP3D1,AP3S2,AP4…	1095
Immunological Disease	rheumatoid arthritis	rheumatoid arthritis	2.87E-08		-0.665	A2M,ABCB1,ABCB5,ABCC4 (includes EG:10257),ABO,ACER3,ACLY,ACMSD,ACO1,ACOT7,ACOX2,ACPP,ACSBG1,ACSL1,ACTA1,ACTL6A,ACVR1B,ADAM8,ADAMTS2,ADAMTS3,ADAMTS6,ADAP2,ADIPOR1,ADK,ADM,ADRA1B,ADRB2,ADSS,AGBL3,AGER,AGPAT1,AHI1,AIF1 (includes EG:11629),AKR1A1,ALAS2,ALB,ALCAM,ALDH7A1,ALDOA,ALKBH8,ALOX12,ALOX5,ALPK2,ALPL,AMFR,AMPD3,ANAPC4,ANG,ANGPT1,ANGPTL2,ANKFY1,ANKRD12,ANKRD28,ANKS1A,ANTXR1,ANXA5,AP3D1,AP3S2,AP4…	1095
Cellular Movement	invasion	invasion of tumor cell lines	3.02E-08		0.837	ACAT1,ADAM17,ADAM9,ADAMTS15,ADI1 (includes EG:104923),ADM,AFAP1L1,AGER,AGR2,AGT,AKT2,AKT3 (includes EG:10000),APP,AR,ARRDC3,ASAP1,ASGR1,ATF1 (includes EG:100040260),ATF3,ATP6V0A4,AURKA,AXL,AZGP1,B3GNT1,BATF3,BCAN,BCAR1,BDNF,BMP4,BMP7,BRAF,BTC,CA3,CALR,CARD10,CASP3,CAT,CAV1,CBL,CBX5,CCR7,CD151,CD9,CD97,CDC25B,CDH1,CDH2,CDH4,CDK5RAP3,CDKN1B,CHRD,CHST10,CLDN3,CLDN4,CLDN7,COL18A1,CRK,CRMP1,CSE1L,CSF2…	298
Cell Death	cell death	cell death of central nervous system cells	3.20E-08		-0.354	AATK,ACHE,ADNP,ADRBK1,ALOX15,APOE,APP,ATP13A2,ATP2C1,ATXN1,B4GALNT1,BAK1,BCL2L1,BCL2L12,BCL2L2,BDNF,BMP2,CACNA2D2,CADPS2,CAPNS1,CASP2,CASP3,CASP6,CASP8,CASP9 (includes EG:100140945),CDC25A,CDK1,CDK4,CDK5,CDKN1A,CDKN1B,CDKN2D,CFLAR,CLU,CRHR1,CRYAB,CTSD,CYCS,DDIT3,DICER1,E2F1,EDN1,EPO,ETS2,F2,F2R,FAIM,FAIM2,FAS,FCGR1A,FGF8,FOXO1 (includes EG:2308),FOXO3,FRAT1,GAL,GAS6,GBA,GCLC,GCLM,GDNF,GLRX,GNAO1,…	154
Cell Death	cell death	cell death of brain cells	3.25E-08		-0.243	AATK,ACHE,ADNP,ADRBK1,ALOX15,APOE,APP,ATP13A2,ATP2C1,ATXN1,B4GALNT1,BAK1,BCL2L1,BCL2L2,BDNF,BMP2,CACNA2D2,CADPS2,CAPNS1,CASP2,CASP3,CASP6,CASP8,CASP9 (includes EG:100140945),CDC25A,CDK1,CDK4,CDK5,CDKN1A,CDKN1B,CDKN2D,CFLAR,CLU,CRHR1,CTSD,CYCS,DDIT3,DICER1,E2F1,EPO,ETS2,F2,FAIM,FAIM2,FAS,FCGR1A,FGF8,FOXO1 (includes EG:2308),FOXO3,FRAT1,GAL,GAS6,GBA,GCLC,GCLM,GDNF,GLRX,GNAO1,GRID2,GSK3A,GSK3B,HDAC9…	140
Cancer	Waldenstrom's macroglobulinemia	Waldenstrom's macroglobulinemia	3.53E-08			ADAM9,AKAP5,AKT2,AKT3 (includes EG:10000),ANXA11,ANXA4,ANXA6,APBA1,APBA3,ARHGAP1,ATP2B2,ATRN,BCAT1,BCLAF1,CASP7,CASP8,CAV1,CBX2,CCNDBP1,CD247,CDC20,CDC27,CDK1,CDK2,CHAF1A,CHRNB1,CHUK,CNTFR,COMT,CREBBP,CSF1R,CTBP1,CTSL1,DHX16,DIABLO,E2F2,ECI2,EGFR,F11R,FADD,FASN,FEN1,FKBP1A,FUBP1,FUS,FYB,G3BP1,GEMIN2,GFAP,GIT1 (includes EG:216963),GRIP1,GSK3B,GSN,GTF2I,HAT1,HDAC2,HDAC3,HDAC4,HDAC5,HDAC6,HDAC9,HMGC…	145
Hematological Disease	Waldenstrom's macroglobulinemia	Waldenstrom's macroglobulinemia	3.53E-08			ADAM9,AKAP5,AKT2,AKT3 (includes EG:10000),ANXA11,ANXA4,ANXA6,APBA1,APBA3,ARHGAP1,ATP2B2,ATRN,BCAT1,BCLAF1,CASP7,CASP8,CAV1,CBX2,CCNDBP1,CD247,CDC20,CDC27,CDK1,CDK2,CHAF1A,CHRNB1,CHUK,CNTFR,COMT,CREBBP,CSF1R,CTBP1,CTSL1,DHX16,DIABLO,E2F2,ECI2,EGFR,F11R,FADD,FASN,FEN1,FKBP1A,FUBP1,FUS,FYB,G3BP1,GEMIN2,GFAP,GIT1 (includes EG:216963),GRIP1,GSK3B,GSN,GTF2I,HAT1,HDAC2,HDAC3,HDAC4,HDAC5,HDAC6,HDAC9,HMGC…	145
Immunological Disease	Waldenstrom's macroglobulinemia	Waldenstrom's macroglobulinemia	3.53E-08			ADAM9,AKAP5,AKT2,AKT3 (includes EG:10000),ANXA11,ANXA4,ANXA6,APBA1,APBA3,ARHGAP1,ATP2B2,ATRN,BCAT1,BCLAF1,CASP7,CASP8,CAV1,CBX2,CCNDBP1,CD247,CDC20,CDC27,CDK1,CDK2,CHAF1A,CHRNB1,CHUK,CNTFR,COMT,CREBBP,CSF1R,CTBP1,CTSL1,DHX16,DIABLO,E2F2,ECI2,EGFR,F11R,FADD,FASN,FEN1,FKBP1A,FUBP1,FUS,FYB,G3BP1,GEMIN2,GFAP,GIT1 (includes EG:216963),GRIP1,GSK3B,GSN,GTF2I,HAT1,HDAC2,HDAC3,HDAC4,HDAC5,HDAC6,HDAC9,HMGC…	145
Cell Cycle	checkpoint control	checkpoint control	3.60E-08		-1.730	ATM,BUB1 (includes EG:100307076),BUB1B,BUB3 (includes EG:12237),CCNE2,CCNG2,CDC20,CDC25A,CDC25C,CDC6 (includes EG:23834),CDC7 (includes EG:12545),CDK2,CHEK1,CHEK2,CHFR,DBF4 (includes EG:10926),DCLRE1B,DDB1,EIF4E,ERCC2,ERCC3,FANCD2,FANCG,KNTC1,MAD2L1BP,MCM7,MEN1,MRE11A,MSH2,MTBP,NBN,NDC80,PIN1,PMS2,POLH,PRCC,PTEN,RAD17 (includes EG:19356),RAD9A,RAE1,RB1,RBBP8,SMC1A,TIPIN,TP53 (includes EG:22059),T…	51
DNA Replication, Recombination, and Repair	checkpoint control	checkpoint control	3.60E-08		-1.730	ATM,BUB1 (includes EG:100307076),BUB1B,BUB3 (includes EG:12237),CCNE2,CCNG2,CDC20,CDC25A,CDC25C,CDC6 (includes EG:23834),CDC7 (includes EG:12545),CDK2,CHEK1,CHEK2,CHFR,DBF4 (includes EG:10926),DCLRE1B,DDB1,EIF4E,ERCC2,ERCC3,FANCD2,FANCG,KNTC1,MAD2L1BP,MCM7,MEN1,MRE11A,MSH2,MTBP,NBN,NDC80,PIN1,PMS2,POLH,PRCC,PTEN,RAD17 (includes EG:19356),RAD9A,RAE1,RB1,RBBP8,SMC1A,TIPIN,TP53 (includes EG:22059),T…	51
Cell Death	apoptosis	apoptosis of mononuclear leukocytes	3.66E-08		-0.364	ABL1,ADA,ADORA2A,ADRB1,AIMP1,AKTIP,APOE,ARRB1,ATM,BAK1,BCL10,BCL2A1,BCL2L1,BLNK,BMP4,BRCA1,BTK,CASP2,CASP3,CASP4,CASP7,CASP8,CASP9 (includes EG:100140945),CAV1,CCL25,CCL5,CCR8,CD247,CD27,CD274,CD3E,CD4,CD40,CD47,CD59 (includes EG:25407),CD9,CDK2,CDKN1A,CFLAR,CHEK1,CHEK2,CHUK,CIITA,CSF2,CTNNB1,CXCR4,DFFA,DICER1,DLL4,DNAJA3,E2F1,E2F2,EGR1,EGR3,EIF4E,ETS2,EZR,FAIM3,FAS,FBXW7,FCER1A,FCGR1A,FCGR2B,FOS…	197
Protein Degradation	catabolism	catabolism of protein	4.08E-08		-0.165	ADAMTS4,ADAMTS9,AGAP2,AMFR,ANAPC10,ANAPC4,ANAPC5,APC,ARIH1,ARIH2,ARNTL,ATG4B,AXIN1,BTRC,CAST,CBLB,CBLC,CDC23,CDKN1B,CHEK2,CHFR,CSF1 (includes EG:12977),CUL2,CUL4A,CUL4B,DERL1,DERL2,EDEM1,EDEM3,FAF1 (includes EG:11124),FBXL12,FBXL4,FBXO2,FBXO22,FBXO32,FBXO6,FBXO7,FBXO8,FLNA,FURIN,FYN,GJA1,GRIN2A,GRIN2C,HDAC6,HGS,IER3,IRAK3,ITCH,LNPEP,LNX1,LOC643751,LRSAM1,MAD2L2,MANBA,MAPK15,MDM4,MTOR,MYLIP,NEDD4,…	114
Protein Synthesis	catabolism	catabolism of protein	4.08E-08		-0.165	ADAMTS4,ADAMTS9,AGAP2,AMFR,ANAPC10,ANAPC4,ANAPC5,APC,ARIH1,ARIH2,ARNTL,ATG4B,AXIN1,BTRC,CAST,CBLB,CBLC,CDC23,CDKN1B,CHEK2,CHFR,CSF1 (includes EG:12977),CUL2,CUL4A,CUL4B,DERL1,DERL2,EDEM1,EDEM3,FAF1 (includes EG:11124),FBXL12,FBXL4,FBXO2,FBXO22,FBXO32,FBXO6,FBXO7,FBXO8,FLNA,FURIN,FYN,GJA1,GRIN2A,GRIN2C,HDAC6,HGS,IER3,IRAK3,ITCH,LNPEP,LNX1,LOC643751,LRSAM1,MAD2L2,MANBA,MAPK15,MDM4,MTOR,MYLIP,NEDD4,…	114
Cell Cycle	cell division process	cell division process of chromosomes	4.31E-08		0.319	AGT,AHR,AKAP9,AKT3 (includes EG:10000),APC,ARID1A,ARL8B,ATM,ATR,ATRX,AURKA,AURKB,AURKC,BECN1,BIRC5,BLM,BRCA1,BTRC,BUB1 (includes EG:100307076),BUB1B,BUB3 (includes EG:12237),CCNA2,CDC14A,CDCA8,CDK5RAP2,CDK7,CDKN1A,CEBPD,CENPF,CENPH,CENPV,CHFR,CHKB,CIT,CKAP2,CKS1B,CRYAB,CUL3 (includes EG:26554),DCLK2,DCLRE1C,DMC1,DSN1 (includes EG:100002916),DYRK2,EBNA1BP2,ECT2,EDN1,EGFR,EIF2AK3,EIF3E,ERCC1,ESPL1,…	153
Tissue Development	accumulation	accumulation of cells	4.91E-08		1.215	ABL1,ADORA2A,AGT,AHR,ALOX5,APC,APOA1,APOE,AR,ARRB2,AURKA,BCL10,BCL3,BCR,BIRC5,BUB1B,C5,CASP8,CBS,CCL5,CCND1,CD200,CD274,CD80 (includes EG:12519),CD86,CDKN1A,CDKN1C,CHEK1,CLU,COL18A1,CSF1 (includes EG:12977),CTF1,CUL5,CXCL2,CXCL9,CXCR3,CYBB,DEF6,DLX3,DOCK1,DSC1,DUSP1,DYRK1B,E2F1,E2F6,EDN1,EGR1,ENTPD1,ETS2,F2,FADD,FAS,FASN,FGF1,FGF2,FHIT,FLT3LG,GADD45G,GFI1,GNAI2,GNAQ,GRN,HDC,HGF,HMOX1,ICAM1,ICOSLG…	191
Cellular Movement	migration	migration of breast cancer cell lines	6.32E-08		0.819	ANGPT2,ANKS1A,ARHGDIB,ARRB1,ARRB2,ARRDC3,AXL,BCAR1,BMP6,CAV1,CCL17,CDH1,CDH2,CRK,CSE1L,CST6 (includes EG:1474),CTNNB1,CTSL1,CTTN,CXCL9,CXCR4,CYP2J2,DBF4 (includes EG:10926),DNAJA3,EFNA5,EGFR,EPO,EPOR,ERBB3,ESRRA,FBLIM1,FGF1,FGF2,FGF7,FGFR2,FOSL1,FOXO3,GAB1,GAB2,GIPC1,GJA1,GLI1,HGF,IGF1R,IGFBP3,IL6,IL8,ITGA6,ITGAV,ITGB1,ITGB3,JUN,KHDRBS1,LMO7,MAPK14,MATK,MCF2L,MET,MMP14,MMP2,MMP9,MTOR,NCOA6,NRP1 (…	109
Cell Death	apoptosis	apoptosis of lymphocytes	6.41E-08		-0.718	ABL1,ADA,ADORA2A,ADRB1,AIMP1,AKTIP,APOE,ARRB1,ATM,BAK1,BCL10,BCL2A1,BCL2L1,BLNK,BMP4,BRCA1,BTK,CASP2,CASP3,CASP4,CASP7,CASP8,CASP9 (includes EG:100140945),CAV1,CCL25,CCL5,CCR8,CD247,CD27,CD274,CD3E,CD4,CD40,CD47,CD59 (includes EG:25407),CD9,CDK2,CDKN1A,CFLAR,CHEK1,CHEK2,CHUK,CIITA,CTNNB1,CXCR4,DFFA,DICER1,DLL4,DNAJA3,E2F1,E2F2,EGR1,EGR3,EIF4E,ETS2,EZR,FAIM3,FAS,FBXW7,FCGR1A,FCGR2B,FOS,FOXO3,FYN,G…	190
Skeletal and Muscular Disorders	rheumatic disease	rheumatic disease	6.87E-08		0.413	A2M,ABCB1,ABCB5,ABCC4 (includes EG:10257),ABO,Acan,ACER3,ACLY,ACMSD,ACO1,ACOT7,ACOX2,ACPP,ACSBG1,ACSL1,ACTA1,ACTL6A,ACVR1B,ADAM8,ADAMTS1,ADAMTS12,ADAMTS14,ADAMTS15,ADAMTS16,ADAMTS2,ADAMTS3,ADAMTS5,ADAMTS6,ADAMTS9,ADAP2,ADIPOR1,ADK,ADM,ADRA1B,ADRA1D,ADRA2A,ADRA2B,ADRB1,ADRB2,ADSS,AGBL3,AGER,AGPAT1,AHI1,AIF1 (includes EG:11629),AKR1A1,ALAS2,ALB,ALCAM,ALDH7A1,ALDOA,ALKBH8,ALOX12,ALOX5,ALOX5AP,ALPK2,…	1306
Connective Tissue Disorders	rheumatic disease	rheumatic disease	6.87E-08		0.413	A2M,ABCB1,ABCB5,ABCC4 (includes EG:10257),ABO,Acan,ACER3,ACLY,ACMSD,ACO1,ACOT7,ACOX2,ACPP,ACSBG1,ACSL1,ACTA1,ACTL6A,ACVR1B,ADAM8,ADAMTS1,ADAMTS12,ADAMTS14,ADAMTS15,ADAMTS16,ADAMTS2,ADAMTS3,ADAMTS5,ADAMTS6,ADAMTS9,ADAP2,ADIPOR1,ADK,ADM,ADRA1B,ADRA1D,ADRA2A,ADRA2B,ADRB1,ADRB2,ADSS,AGBL3,AGER,AGPAT1,AHI1,AIF1 (includes EG:11629),AKR1A1,ALAS2,ALB,ALCAM,ALDH7A1,ALDOA,ALKBH8,ALOX12,ALOX5,ALOX5AP,ALPK2,…	1306
Inflammatory Disease	rheumatic disease	rheumatic disease	6.87E-08		0.413	A2M,ABCB1,ABCB5,ABCC4 (includes EG:10257),ABO,Acan,ACER3,ACLY,ACMSD,ACO1,ACOT7,ACOX2,ACPP,ACSBG1,ACSL1,ACTA1,ACTL6A,ACVR1B,ADAM8,ADAMTS1,ADAMTS12,ADAMTS14,ADAMTS15,ADAMTS16,ADAMTS2,ADAMTS3,ADAMTS5,ADAMTS6,ADAMTS9,ADAP2,ADIPOR1,ADK,ADM,ADRA1B,ADRA1D,ADRA2A,ADRA2B,ADRB1,ADRB2,ADSS,AGBL3,AGER,AGPAT1,AHI1,AIF1 (includes EG:11629),AKR1A1,ALAS2,ALB,ALCAM,ALDH7A1,ALDOA,ALKBH8,ALOX12,ALOX5,ALOX5AP,ALPK2,…	1306
Cellular Development	development	development of leukocytes	7.17E-08	Increased	2.987	ABL1,ACHE,ADA,ADAM10,ADAM17,ADAR,ADM,AFF1,AHR,AKT2,AP3B1,AP3D1,APC,ATM,ATP7A,AXL,BAD,BCL2A1,BCL2L1,BCL3,BCL6,BIRC5,BLM,BLNK,BMI1,BMP4,BRCA1,BST1 (includes EG:12182),BTK,CALCB,CARD11,CBL,CCL25,CCND3,CCR7,CD244,CD247,CD274,CD3D,CD3E,CD3G,CD4,CD80 (includes EG:12519),CD83,CD86,CD8A,CD9,CDK2,CDKN1A,CDKN1B,CHD4,CHD7,CHEK1,CREB1,CREBBP,CSF1 (includes EG:12977),CSF1R,CSF2,CSK,CTNNB1,CXCR4,CYLD,DEF6,DGKA…	321
Hematological System Development and Function	development	development of leukocytes	7.17E-08	Increased	2.987	ABL1,ACHE,ADA,ADAM10,ADAM17,ADAR,ADM,AFF1,AHR,AKT2,AP3B1,AP3D1,APC,ATM,ATP7A,AXL,BAD,BCL2A1,BCL2L1,BCL3,BCL6,BIRC5,BLM,BLNK,BMI1,BMP4,BRCA1,BST1 (includes EG:12182),BTK,CALCB,CARD11,CBL,CCL25,CCND3,CCR7,CD244,CD247,CD274,CD3D,CD3E,CD3G,CD4,CD80 (includes EG:12519),CD83,CD86,CD8A,CD9,CDK2,CDKN1A,CDKN1B,CHD4,CHD7,CHEK1,CREB1,CREBBP,CSF1 (includes EG:12977),CSF1R,CSF2,CSK,CTNNB1,CXCR4,CYLD,DEF6,DGKA…	321
Hematopoiesis	development	development of leukocytes	7.17E-08	Increased	2.987	ABL1,ACHE,ADA,ADAM10,ADAM17,ADAR,ADM,AFF1,AHR,AKT2,AP3B1,AP3D1,APC,ATM,ATP7A,AXL,BAD,BCL2A1,BCL2L1,BCL3,BCL6,BIRC5,BLM,BLNK,BMI1,BMP4,BRCA1,BST1 (includes EG:12182),BTK,CALCB,CARD11,CBL,CCL25,CCND3,CCR7,CD244,CD247,CD274,CD3D,CD3E,CD3G,CD4,CD80 (includes EG:12519),CD83,CD86,CD8A,CD9,CDK2,CDKN1A,CDKN1B,CHD4,CHD7,CHEK1,CREB1,CREBBP,CSF1 (includes EG:12977),CSF1R,CSF2,CSK,CTNNB1,CXCR4,CYLD,DEF6,DGKA…	321
Lymphoid Tissue Structure and Development	development	development of leukocytes	7.17E-08	Increased	2.987	ABL1,ACHE,ADA,ADAM10,ADAM17,ADAR,ADM,AFF1,AHR,AKT2,AP3B1,AP3D1,APC,ATM,ATP7A,AXL,BAD,BCL2A1,BCL2L1,BCL3,BCL6,BIRC5,BLM,BLNK,BMI1,BMP4,BRCA1,BST1 (includes EG:12182),BTK,CALCB,CARD11,CBL,CCL25,CCND3,CCR7,CD244,CD247,CD274,CD3D,CD3E,CD3G,CD4,CD80 (includes EG:12519),CD83,CD86,CD8A,CD9,CDK2,CDKN1A,CDKN1B,CHD4,CHD7,CHEK1,CREB1,CREBBP,CSF1 (includes EG:12977),CSF1R,CSF2,CSK,CTNNB1,CXCR4,CYLD,DEF6,DGKA…	321
Hematological System Development and Function	erythropoiesis	erythropoiesis	7.34E-08	Increased	2.606	ABL1,ACVR1B,ACVR2A,ADAR,ADD1,AHSP,ALAS2,AXL,BCL2L1,BCL6,BCR,BMP4,BTK,CD163,CDK6,CDKN1A,CDKN1B,CITED2,CSF2,CTCF (includes EG:10664),DNASE2,DYRK3,E2F2,E2F4,EGFR,EGR1,EIF2AK2,EIF2C2,ENG,EPAS1,EPO,EPOR,ERCC2,ETS1,ETV2,ETV6,FAS,FLI1,FLVCR1,FOXO3,G6PD,GATA1,GATA2,GATA3,GFI1B,GNA15,HBZ,HCLS1,HIF1A,HIPK2,HMGA1,HMGB2,HOXA5,ID2,IFNAR1,IL4 (includes EG:16189),IL6,IL6R,IL6ST,INHBA,INPP5D,JAK2,JMJD6,JUNB,KDM1…	125
Hematopoiesis	erythropoiesis	erythropoiesis	7.34E-08	Increased	2.606	ABL1,ACVR1B,ACVR2A,ADAR,ADD1,AHSP,ALAS2,AXL,BCL2L1,BCL6,BCR,BMP4,BTK,CD163,CDK6,CDKN1A,CDKN1B,CITED2,CSF2,CTCF (includes EG:10664),DNASE2,DYRK3,E2F2,E2F4,EGFR,EGR1,EIF2AK2,EIF2C2,ENG,EPAS1,EPO,EPOR,ERCC2,ETS1,ETV2,ETV6,FAS,FLI1,FLVCR1,FOXO3,G6PD,GATA1,GATA2,GATA3,GFI1B,GNA15,HBZ,HCLS1,HIF1A,HIPK2,HMGA1,HMGB2,HOXA5,ID2,IFNAR1,IL4 (includes EG:16189),IL6,IL6R,IL6ST,INHBA,INPP5D,JAK2,JMJD6,JUNB,KDM1…	125
Cell Cycle	cell cycle progression	arrest in cell cycle progression	7.37E-08			ABL1,AHR,AIF1 (includes EG:11629),AK1,AKAP9,APBB1,APBB2,APC,AR,ARID1A,ATM,ATR,AURKA,BAD,BCL2A1,BCL2L1,BCR,BIRC5,BMP4,BRCA1,BTRC,C15orf63,CALR,CAV1,CCNA2,CCND1,CCND2,CCNE1,CCNG2,CDC123,CDC25A,CDC25B,CDH1,CDK2,CDK4,CDK6,CDK7,CDKN1A,CDKN1B,CDKN1C,CDKN2B,CDKN2C,CDKN2D,CDKN3,CHEK1,CHEK2,CKAP2,COL1A1,COMMD5,CSF2,CUL2,CUL3 (includes EG:26554),CUL4A,CUL5,DDX17,DIABLO,DMTF1,DNMT3B,E2F1,E2F2,E2F4,EGFR,EHF,…	212
Cancer	infection	infection of tumor cell lines	7.40E-08		-1.540	AASS,ABTB1,ACACB,ACADSB,ADAM10,ADAMTS5,ADRBK1,AFG3L1,AGAP2,AGBL5,ALKBH8,ANKRD43,ANKRD6,ANKRD9,AP1B1,AP2M1,ARGLU1,ARHGAP32,ARHGEF19,ARPC1A,ARPC3,ARRB1,ASGR2,ASXL2,ATG12 (includes EG:361321),ATG16L2,ATOX1,ATP5B,AXL,BAG6,BAHD1,BCLAF1,BCR,BRCA1,C6orf1,CA2,CAMK1,CAMK1D,CAMKK2,CAPN6,CAV2,CBL,CBLB,CBLC,CCDC134,CCNT1,CCT2,CD4,CD55,CD97,CDC40 (includes EG:361859),CHST1,CHST14,CLDND1,CLTB,CLTC,COG2 (includ…	368
Infectious Disease	infection	infection of tumor cell lines	7.40E-08		-1.540	AASS,ABTB1,ACACB,ACADSB,ADAM10,ADAMTS5,ADRBK1,AFG3L1,AGAP2,AGBL5,ALKBH8,ANKRD43,ANKRD6,ANKRD9,AP1B1,AP2M1,ARGLU1,ARHGAP32,ARHGEF19,ARPC1A,ARPC3,ARRB1,ASGR2,ASXL2,ATG12 (includes EG:361321),ATG16L2,ATOX1,ATP5B,AXL,BAG6,BAHD1,BCLAF1,BCR,BRCA1,C6orf1,CA2,CAMK1,CAMK1D,CAMKK2,CAPN6,CAV2,CBL,CBLB,CBLC,CCDC134,CCNT1,CCT2,CD4,CD55,CD97,CDC40 (includes EG:361859),CHST1,CHST14,CLDND1,CLTB,CLTC,COG2 (includ…	368
Cancer	gonadal tumor	gonadal tumor	7.41E-08		-1.183	ABCB1,ABL1,ADA,AFP,AGPAT2,AGR2,AKT2,AKT3 (includes EG:10000),ALCAM,ALDH1A1,ALDH3A1,AMH,ANXA10,APOE,AR,ARL4C,ASCL2,ATP6V1B1,ATP8B1,AXL,BCL10,BCR,BECN1,BMP7,BNC1,BRAF,BRCA1,BRF1 (includes EG:2972),BTRC,C11orf9,C13orf15,C19orf2,C2orf88,C8orf84,C9orf86,CACNA1A,CALB2,CALCOCO2,CAMK2N2,CAMP,CCND2,CCT5,CDH1,CDK4,CHRNA1,CHRNA10,CHRNA5,CHRNA7,CHRNA9,CHRNB1,CHRNB2,CHRND,CHRNE,CHRNG,CLDN3,CLDN4,CLDN7,CLEC3B,…	346
Reproductive System Disease	gonadal tumor	gonadal tumor	7.41E-08		-1.183	ABCB1,ABL1,ADA,AFP,AGPAT2,AGR2,AKT2,AKT3 (includes EG:10000),ALCAM,ALDH1A1,ALDH3A1,AMH,ANXA10,APOE,AR,ARL4C,ASCL2,ATP6V1B1,ATP8B1,AXL,BCL10,BCR,BECN1,BMP7,BNC1,BRAF,BRCA1,BRF1 (includes EG:2972),BTRC,C11orf9,C13orf15,C19orf2,C2orf88,C8orf84,C9orf86,CACNA1A,CALB2,CALCOCO2,CAMK2N2,CAMP,CCND2,CCT5,CDH1,CDK4,CHRNA1,CHRNA10,CHRNA5,CHRNA7,CHRNA9,CHRNB1,CHRNB2,CHRND,CHRNE,CHRNG,CLDN3,CLDN4,CLDN7,CLEC3B,…	346
Developmental Disorder	lysosomal storage disease	lysosomal storage disease	7.79E-08		0.114	ABHD5,ALDH3A2,ARSA,ARSB,ASAH1,BDNF,CAV1,CD14,CD36,CD47,CD55,CLCN6,CLCN7,CLN5,CLN6,CLN8,CTSD,FLOT2,GALC,GBA,GBA2,GJC2,GLB1,GM2A,GNPTAB,GNPTG,GNS,GUSB,HDAC4,HDAC5,HEXA,HEXB,HGSNAT,HYAL1,IDS,IDUA,MANBA,MCOLN1,MFSD8,NEU1,NPC1,NPC2 (includes EG:10577),PNPLA2,PPT1,PSAP,S1PR3,SLC17A5,SMPD1,SPHK1,TPP1 (includes EG:1200),UGCG,VKORC1	52
Genetic Disorder	lysosomal storage disease	lysosomal storage disease	7.79E-08		0.114	ABHD5,ALDH3A2,ARSA,ARSB,ASAH1,BDNF,CAV1,CD14,CD36,CD47,CD55,CLCN6,CLCN7,CLN5,CLN6,CLN8,CTSD,FLOT2,GALC,GBA,GBA2,GJC2,GLB1,GM2A,GNPTAB,GNPTG,GNS,GUSB,HDAC4,HDAC5,HEXA,HEXB,HGSNAT,HYAL1,IDS,IDUA,MANBA,MCOLN1,MFSD8,NEU1,NPC1,NPC2 (includes EG:10577),PNPLA2,PPT1,PSAP,S1PR3,SLC17A5,SMPD1,SPHK1,TPP1 (includes EG:1200),UGCG,VKORC1	52
Metabolic Disease	lysosomal storage disease	lysosomal storage disease	7.79E-08		0.114	ABHD5,ALDH3A2,ARSA,ARSB,ASAH1,BDNF,CAV1,CD14,CD36,CD47,CD55,CLCN6,CLCN7,CLN5,CLN6,CLN8,CTSD,FLOT2,GALC,GBA,GBA2,GJC2,GLB1,GM2A,GNPTAB,GNPTG,GNS,GUSB,HDAC4,HDAC5,HEXA,HEXB,HGSNAT,HYAL1,IDS,IDUA,MANBA,MCOLN1,MFSD8,NEU1,NPC1,NPC2 (includes EG:10577),PNPLA2,PPT1,PSAP,S1PR3,SLC17A5,SMPD1,SPHK1,TPP1 (includes EG:1200),UGCG,VKORC1	52
Infectious Disease	replication	replication of Influenza virus	8.04E-08		-0.410	ACTC1,ACVR2A,ADRA1B,AGTRAP,AKTIP,ANPEP,AP2M1,APBB1IP,APC2 (includes EG:10297),ARAF,ARCN1,ATCAY,ATP1A2,ATP2C1,ATP6AP1,ATP6AP2,ATP6V0B,ATP6V0D1,ATP6V1A,ATP6V1B2,BAK1,BCL3,CANT1,CBLL1,CD48,CD58,CDC42BPA,CDK4,CDKN1B,CEL,CIT,CLIC4,CLSTN3,COLEC10,COPA,COPB1,COPG,CRAMP1L,CREB1,CSE1L,CXCR6,CYP2U1,DBT,DCLK2,DDX58,DLG2,DMAP1,DTX2,DTX3,DUSP27,DUSP3,EIF2AK2,EIF3A,EIF3G,EIF4A3,EPHB2,F2RL1,FAU,FBXO44,FGFR1,FGF…	218
Cancer	lymphatic node tumor	lymphatic node tumor	8.36E-08		0.302	ABCA7,ABL1,ADA,ADORA2A,AKT2,AKT3 (includes EG:10000),ALK,AMY2A,ATM,AURKB,BCL10,BCL2L1,BCL3,BCL6,BCR,BIRC5,BRD2,BTG1,BTG2,CARD11,CCND3,CCR7,CD163,CD247,CD3D,CD3E,CD3G,CD40,CD58,CD8A,CDK2,CDK4,CDK6,CDK7,CDKN1B,CDKN2C,CFLAR,CHEK1,CIITA,CMIP,COL3A1,COL4A1,COL4A2,CREBBP,CSE1L,CSF2RB,CSTF3,CXCL9,CXCR3,CXCR4,CYR61,DCLRE1C,DCN,DDB2,DHFR,DMTF1,DNMT3B,DPP4,DTX1,E2F1,E2F2,EGR1,EIF2AK1,EIF4E,EIF4EBP1,EPHA2,E…	232
Cellular Development	differentiation	differentiation of tumor cell lines	8.62E-08		0.734	ABL1,ACVR1C,ADAM10,ADRB1,AHR,AKAP5,AKT2,ALG5,ARHGAP32,ATF2,ATM,ATP2C1,AUP1,AXIN1,AZGP1,B4GALNT1,BCL2L1,BCL6,BCR,BDH2 (includes EG:295458),BDNF,BECN1,BEX2,BHLHE40,BMP4,BTC,BTG2,C1QBP,CALR,CCND1,CD14,CD3E,CDH1,CDK2,CDK4,CDK5R1,CDK6,CDKN1A,CDKN1B,CEBPD,CHD1,CHKA,COL18A1,CREBBP,CREG1,CRK,CSF1 (includes EG:12977),CSF2,CSF2RB,CTCF (includes EG:10664),CTGF,CTSK,CUL4A,DAB2,DDIT3,DEDD,DMTF1,DPP4,DUSP1,DYR…	235
Cell Death	apoptosis	apoptosis of epithelial cell lines	8.82E-08		-0.090	ADRBK1,AIFM1,AIFM3,ALDH3A1,ALOX15,APP,ATF3,ATP2B2,BAD,BCL10,BCL2A1,BCL2L1,BCL6,BIRC3,BIRC5,BNIP3,BOK,CA3,CALB1,CASP2,CASP3,CASP8,CASP9 (includes EG:100140945),CDH1,CEBPD,CFLAR,CHMP5,CLIC4,CRYAB,CSF1R,CUL7,CYCS,DAB2,DAP3,DAXX,DDIT3,DDN,DDX17,DECR1,E2F6,EIF2AK2,F2,FADD,FAS,FGF1,FGFR4,FOS,FOXO3,GSK3B,HIPK2,HSPA5,HSPB8,HTT,IER3,IGFBP3,IL17RD,IL24,INSR,IPPK,IRS1,ITCH,ITGA5,ITGAV,ITGB1,JAK2,JUN,KRAS,LY…	142
Cell Death	cell death	cell death of liver	9.45E-08		0.011	ADM,AGER,AHR,APOE,ARNT,ATF7,ATP2A1,ATR,BAK1,BCL2L1,CASP3,CASP7,CASP8,CASP9 (includes EG:100140945),CD14,CD274,CD40,CDKN1A,CDKN1B,CHUK,CIT,CTSB,CYP7A1,DAXX,DDIT3,DICER1,E2F1,EGFR,ENDOG,EPO,FAAH,FADD,FAS,FGL2,FOS,GADD45B,GSK3B,GSTZ1,HGF,HMOX1,IER3,IKBKB,IL15 (includes EG:16168),IL1RN,IL27RA,IL2RA,IL4 (includes EG:16189),IL6,IL6ST,INHA,IRF2,IRF5,IRF8,ITGAV,ITGB2,ITGB3,JUN,LAMP2,LTBR,MAP2K1,MAP2K4,MA…	126
Carbohydrate Metabolism	metabolism	metabolism of polysaccharide	9.45E-08		0.367	ACADM,Acan,ADRA1B,ADRB1,ADRBK1,AGL,AKT2,ANGPT1,AOAH,APOE,ASPN,B3GALT6,B3GAT3,B4GALNT1,C1QTNF2,CCND3,CD40,CHST1,CHST11,CHST12,CHST13,CHST14,CHST3,CHST6,CHSY1,CLN6,COL11A1,CPS1,CSF1 (includes EG:12977),CSF1R,CSGALNACT1,CSGALNACT2,CTGF,CTNNB1,DSE,DYRK2,ENPP1,EXT1,EXT2,FGF2,FOXL1,G6PC,GAA,GALNT5,GCK,GCNT2,GCNT3,GFPT1,GLCE,GNMT,GNS,GPAM,GRB10,GSK3A,GSK3B,GUSB,GYG1,GYS2,H6PD,HAS3,HEXA,HEXB,HPSE,HS2ST1,…	126
Cellular Movement	cell movement	cell movement of breast cancer cell lines	1.04E-07		0.879	ANGPT2,ANKS1A,ARHGDIB,ARRB1,ARRB2,ARRDC3,AXL,BCAR1,BMP6,CAV1,CCL17,CD151,CDH1,CDH2,CRK,CSE1L,CST6 (includes EG:1474),CTNNB1,CTSL1,CTTN,CXCL9,CXCR4,CYP2J2,DBF4 (includes EG:10926),DNAJA3,EFNA5,EGFR,EPO,EPOR,ERBB3,ESR2,ESRRA,FBLIM1,FGF1,FGF2,FGF7,FGFR2,FOS,FOSL1,FOXO3,FURIN,GAB1,GAB2,GIPC1,GJA1,GLI1,GNB2L1,GPI,HGF,IGF1R,IGFBP3,IL6,IL8,ITGA2,ITGA6,ITGAV,ITGB1,ITGB3,JUN,KHDRBS1,L1CAM,LMO7,LPAR1,LRIG1…	131
Protein Synthesis	polymerization	polymerization of protein	1.11E-07		0.931	AASS,ACADL,ACADM,ACADS,ACAT1,ACHE,ACOT13,ACTN2,ADSL,AK3,ALAD,ALDH1A1,ALDH5A1,ALDOC,ALOX15,AMFR,ANGPT1,ANGPTL4,ANXA5,AQP11,AQP4,ATL1,ATL3,AXIN1,BAG4,BCL10,BIRC3,BLM,BRAF,C10orf2,C1QTNF1,C1QTNF2,CAB39,CASP8,CAT,CAV1,CAV2,CBR4,CCDC92,CCL5,CDA,CDH1,CDH2,CEP57,CLPP,CORO1A,CPT1A,CRP,CRYAB,CRYZ,CSF1 (includes EG:12977),CTH,CTNNB1,CUTA,CUTC,DCTPP1,DECR1,DEF6,DGKH,DHPS,DPYS,DSTN,ECT2,EHD3,EIF2AK3,EVL,FADD…	196
Infectious Disease	replication	replication of Influenza A virus	1.14E-07		-0.274	ACTC1,ACVR2A,ADRA1B,AGTRAP,AKTIP,ANPEP,AP2M1,APBB1IP,APC2 (includes EG:10297),ARAF,ARCN1,ATCAY,ATP1A2,ATP2C1,ATP6AP1,ATP6AP2,ATP6V0B,ATP6V0D1,ATP6V1A,ATP6V1B2,BAK1,BCL3,CANT1,CBLL1,CD48,CD58,CDC42BPA,CDK4,CDKN1B,CEL,CIT,CLIC4,CLSTN3,COLEC10,COPA,COPB1,COPG,CRAMP1L,CREB1,CSE1L,CXCR6,CYP2U1,DBT,DCLK2,DDX58,DLG2,DMAP1,DTX2,DTX3,DUSP27,DUSP3,EIF2AK2,EIF3A,EIF3G,EIF4A3,EPHB2,F2RL1,FAU,FBXO44,FGFR1,FGF…	215
Cancer	ovarian tumor	ovarian tumor	1.17E-07		-1.828	ABCB1,ABL1,ADA,AFP,AGPAT2,AGR2,AKT2,AKT3 (includes EG:10000),ALCAM,ALDH1A1,ALDH3A1,AMH,ANXA10,APOE,AR,ARL4C,ASCL2,ATP6V1B1,ATP8B1,AXL,BCL10,BCR,BECN1,BMP7,BNC1,BRAF,BRCA1,BRF1 (includes EG:2972),BTRC,C11orf9,C13orf15,C19orf2,C2orf88,C8orf84,C9orf86,CACNA1A,CALB2,CALCOCO2,CAMK2N2,CAMP,CCT5,CDH1,CDK4,CLDN3,CLDN4,CLDN7,CLEC3B,CLU,CMTM4,CMTM8,COL15A1,COL18A1,COL4A1,COPS2,COX5A (includes EG:12858),CP,…	326
Reproductive System Disease	ovarian tumor	ovarian tumor	1.17E-07		-1.828	ABCB1,ABL1,ADA,AFP,AGPAT2,AGR2,AKT2,AKT3 (includes EG:10000),ALCAM,ALDH1A1,ALDH3A1,AMH,ANXA10,APOE,AR,ARL4C,ASCL2,ATP6V1B1,ATP8B1,AXL,BCL10,BCR,BECN1,BMP7,BNC1,BRAF,BRCA1,BRF1 (includes EG:2972),BTRC,C11orf9,C13orf15,C19orf2,C2orf88,C8orf84,C9orf86,CACNA1A,CALB2,CALCOCO2,CAMK2N2,CAMP,CCT5,CDH1,CDK4,CLDN3,CLDN4,CLDN7,CLEC3B,CLU,CMTM4,CMTM8,COL15A1,COL18A1,COL4A1,COPS2,COX5A (includes EG:12858),CP,…	326
Cell Death	cell death	cell death of breast cancer cell lines	1.23E-07		-1.366	ABCC4 (includes EG:10257),ABCG2,ADM,AKT2,ALOX15,AMH,ANGPT2,ATF2,ATG5 (includes EG:11793),BAD,BAG3,BAK1,BARD1,BCAR1,BCAS2,BCL10,BCL2L1,BCL2L13,BCL2L2,BECN1,BEX2,BIRC3,BIRC5,BMX,BNIP3,BRCA1,C9orf86,CAMP,CASP2,CASP3,CASP6,CASP7,CASP8,CASP9 (includes EG:100140945),CAV1,CCND1,CDH1,CDK1,CDKN1A,CERS5,CFLAR,CHMP5,CLCA2,CLU,CRABP2,CSE1L,CTCF (includes EG:10664),CTGF,CTNNB1,CYCS,CYLD,CYR61,DAB2,DDIT4,DIABL…	194
Cell Cycle	interphase	arrest in interphase of tumor cell lines	1.31E-07			ABL1,ACIN1,AGK,AMH,AR,ATF2,ATF5,ATM,ATR,BHLHE40,BMP2,BMP7,BRAF,BRCA1,BRSK2,BTG2,BTRC,CAMK1,CAMKK1,CAMKK2,CASP3,CCNA2,CCND1,CCND3,CCNE1,CD40,CDC25A,CDC25B,CDC25C,CDC7 (includes EG:12545),CDH13,CDK1,CDK2,CDK4,CDK5RAP3,CDKN1A,CDKN1B,CDKN1C,CDKN2B,CEBPD,CHEK1,CHEK2,CHKA,CREM,CSE1L,CSF2,CTNNB1,CYP1B1,CYR61,DAXX,DCN,DDIT3,DEGS1,DPP4,DUSP1,EGFR,EPB41L1,EPO,ESR2,ESRRG,EZH2,FADD,FASN,FGF2,FHIT,FOXM1,FOXO1…	166
Cell Death	cell death	cell death of muscle cells	1.31E-07		-0.152	ACHE,ADCY5,ADM,ADRB1,ADRB2,AGER,AGT,ALDOA,ANKRD1,APIP,APOPT1,APP,ARRB2,ATP2B4,BCL2L1,BCL6,BECN1,BIRC3,BIRC5,BMP2,BMP4,BNIP2,BNIP3,CACNB2,CAMK2D,CAMP,CAPN1,CASP3,CASP8,CASP9 (includes EG:100140945),CAT,CAV1,CAV3,CCNT1,CDC42EP3,CDKN1A,CDKN1C,COQ6,CRYAB,CSF1R,CTF1,CYBB,DAG1,DDIT3,DICER1,DSP,DUSP6,E2F1,EDN1,EEF1A2,EEF1D,EPO,ETS1,FADD,FAS,FGF2,FOSL1,FOXO1 (includes EG:2308),FSTL1,FSTL3,GNAQ,GNPTG,GSK3…	166
Cellular Assembly and Organization	formation	formation of cellular protrusions	1.45E-07		0.731	ABL1,ACAP1,ACHE,ACTN2,ACTR3,AGT,AHR,AKAP12,AMIGO1,ANPEP,APC,AQP1,ARAP1,ARFIP2,ARHGAP24,ARHGAP32,ARHGEF4,ARPC2,ASAP1,AVIL,B3GNT1,B9D2,BAIAP2,BBS10,BBS4,BBS5,BTG3,C1QBP,C5,CAPG,CAPN2,CAPNS1,CAPZB,CAST,CBY1,CCDC88A,CCR7,CD2AP,CD47,CDC42EP1,CDC42EP2,CDC42EP4,CDC42EP5,CDH13,CDH2,CHN1,CSF1 (includes EG:12977),CTGF,CTTN,CYFIP1,CYR61,DAG1,DGKG,DIAPH3,DIXDC1,DNAI2,DYNC2H1,DYNC2LI1,E2F4,EFNB1,EVI5L,EXOC7,F…	225
RNA Post-Transcriptional Modification	processing	processing of mRNA	1.50E-07		1.191	ALB,APP,BARD1,CDC40 (includes EG:361859),CDC5L,CDK13,CDK7,CELF3,CELF4,CELF6,CPSF1,CPSF3,CPSF6,CRNKL1,CSTF1,CSTF2T,CSTF3,DBR1 (includes EG:323746),DDX39A,DDX39B,DHX38,EFTUD2,GEMIN2,GEMIN6,GEMIN7,GRSF1,HCFC1,HNRNPA0,HNRNPA2B1,HNRNPH3,HNRNPM,HNRNPR,KHDRBS1,KHDRBS3,KIN,LSM3 (includes EG:27258),MBNL1,NCBP1,NCBP2,PABPN1,PHF5A,PIN1,PLCB1,PLRG1,PNPT1,PPARGC1A,PRPF19,PRPF3,PRPF31,PRPF8,PTCD2,RBM15B,RBM5,R…	99
Cell Death	cell death	cell death of brain	1.57E-07		-0.185	AATK,ACHE,ADNP,ADRBK1,AKT3 (includes EG:10000),ALOX15,APOE,APP,ATP13A2,ATP2C1,ATXN1,B4GALNT1,BAK1,BCL2L1,BCL2L2,BDNF,BMP2,CACNA2D2,CADPS2,CAPNS1,CASP2,CASP3,CASP6,CASP8,CASP9 (includes EG:100140945),CDC25A,CDK1,CDK4,CDK5,CDKN1A,CDKN1B,CDKN2D,CFLAR,CLU,CRHR1,CTSD,CYCS,DDIT3,DICER1,DLG4,DNAJB2,E2F1,EPO,ETS2,F2,FAIM,FAIM2,FAS,FCGR1A,FGF8,FOXO1 (includes EG:2308),FOXO3,FRAT1,GAL,GAS6,GBA,GCLC,GCLM,GD…	152
Cell Death	apoptosis	apoptosis of prostate cancer cell lines	1.58E-07	Increased	2.845	ABCE1,ABL1,ADI1 (includes EG:104923),ALOX12,ALOX5,AR,ATM,BAD,BAK1,BCL2L1,BIRC3,BIRC5,BMP2,BMP7,BMX,BRCA1,CALR,CASP3,CASP7,CASP8,CASP9 (includes EG:100140945),CAT,CAV1,CDK5,CDK5R1,CFLAR,CLU,COX5A (includes EG:12858),CREB1,DIABLO,DIRAS3,DKK3,E2F1,EDN1,EGFR,EGR1,EHF,ENTPD5,ETS2,FADD,FAS,FASN,FOS,FOXO1 (includes EG:2308),FOXO3,FST,GADD45A,GADD45G,GDF15,GLIPR1,HBEGF,HGF,HIF1A,HSPB8,ID1,IGFBP3,IGFBP4,I…	110
Cellular Movement	cell movement	cell movement of connective tissue cells	1.76E-07		0.700	ABL1,ABL2,AGER,AGT,AKT2,APOE,AR,ARHGAP35,BCAR1,BMP7,CALCRL,CAPN1,CAPNS1,CAV1,CBL,CCL5,CCND1,CCR7,CDKN1A,CDKN1B,CHUK,CSF1 (includes EG:12977),CTGF,CTNNB1,CXCR3,CYSLTR2,DAPK3,DDR2 (includes EG:18214),DNM2,EZR,FGF1,FGF2,FLNB,GNA12,GNA13,GSN,HBEGF,HGF,IGBP1,IGF2R,IKBKB,IL16,IL1B,ITGB1,ITGB1BP1,ITGB3,LGALS1,LPAR1,LPP,LRPAP1,MAP2K1,MAP3K1,MAP3K8,MAPK14,MAPKAPK2,MMP14,MRAS,MRC2,MYC,NCF1,NCK1,NCK2,NFKB2,…	106
Carbohydrate Metabolism	metabolism	metabolism of phosphatidic acid	1.76E-07	Increased	2.121	ABHD5,AGK,AGPAT1,AGPAT2,AGPAT6,APOA1,APOA2,APOA4,C5,CD40,CDIPT,CEPT1,CERS5,CHKA,CHKB,CHPT1,CSF2,EDN1,ETNK2,F2,FABP3,FCGR2B,FGF7,FIG4,FLT1,GALR2,GAPVD1,GPAM,GRP,HTR2A,HTR2B,IL1B,IL8,IMPA1,INPP5E,ITGB1,KDR,LCAT,LPCAT2,LRAT,LYN,MECP2,MTOR,MYD88,NCS1,NGF,NOX1,NTRK1,PCYT1A,PCYT1B,PCYT2,PDGFA,PDGFRB,PEMT,PI4K2A,PI4KA,PI4KB,PIGO,PIK3C2A,PIK3C2B,PIK3C3,PIK3CA,PIK3CG,PIK3R1,PIKFYVE,PIP4K2B,PIP5K1A,PIP5K1C…	106
Lipid Metabolism	metabolism	metabolism of phosphatidic acid	1.76E-07	Increased	2.121	ABHD5,AGK,AGPAT1,AGPAT2,AGPAT6,APOA1,APOA2,APOA4,C5,CD40,CDIPT,CEPT1,CERS5,CHKA,CHKB,CHPT1,CSF2,EDN1,ETNK2,F2,FABP3,FCGR2B,FGF7,FIG4,FLT1,GALR2,GAPVD1,GPAM,GRP,HTR2A,HTR2B,IL1B,IL8,IMPA1,INPP5E,ITGB1,KDR,LCAT,LPCAT2,LRAT,LYN,MECP2,MTOR,MYD88,NCS1,NGF,NOX1,NTRK1,PCYT1A,PCYT1B,PCYT2,PDGFA,PDGFRB,PEMT,PI4K2A,PI4KA,PI4KB,PIGO,PIK3C2A,PIK3C2B,PIK3C3,PIK3CA,PIK3CG,PIK3R1,PIKFYVE,PIP4K2B,PIP5K1A,PIP5K1C…	106
Small Molecule Biochemistry	metabolism	metabolism of phosphatidic acid	1.76E-07	Increased	2.121	ABHD5,AGK,AGPAT1,AGPAT2,AGPAT6,APOA1,APOA2,APOA4,C5,CD40,CDIPT,CEPT1,CERS5,CHKA,CHKB,CHPT1,CSF2,EDN1,ETNK2,F2,FABP3,FCGR2B,FGF7,FIG4,FLT1,GALR2,GAPVD1,GPAM,GRP,HTR2A,HTR2B,IL1B,IL8,IMPA1,INPP5E,ITGB1,KDR,LCAT,LPCAT2,LRAT,LYN,MECP2,MTOR,MYD88,NCS1,NGF,NOX1,NTRK1,PCYT1A,PCYT1B,PCYT2,PDGFA,PDGFRB,PEMT,PI4K2A,PI4KA,PI4KB,PIGO,PIK3C2A,PIK3C2B,PIK3C3,PIK3CA,PIK3CG,PIK3R1,PIKFYVE,PIP4K2B,PIP5K1A,PIP5K1C…	106
Carbohydrate Metabolism	synthesis	synthesis of phosphatidic acid	1.78E-07	Increased	2.081	ABHD5,AGK,AGPAT1,AGPAT2,AGPAT6,APOA1,APOA2,C5,CD40,CDIPT,CEPT1,CERS5,CHKA,CHKB,CHPT1,EDN1,ETNK2,F2,FABP3,FGF7,FLT1,GAPVD1,GPAM,GRP,HTR2A,HTR2B,IL1B,IL8,IMPA1,INPP5E,ITGB1,KDR,LCAT,LPCAT2,LYN,MTOR,MYD88,NCS1,NGF,NOX1,NTRK1,PCYT1A,PCYT1B,PCYT2,PDGFA,PDGFRB,PEMT,PI4K2A,PI4KA,PI4KB,PIGO,PIK3C2A,PIK3C2B,PIK3C3,PIK3CA,PIK3CG,PIK3R1,PIKFYVE,PIP5K1A,PIP5K1C,PISD,PITPNM1,PLA2G10,PLA2G4A,PLD1,PLSCR1,PNPLA6…	87
Lipid Metabolism	synthesis	synthesis of phosphatidic acid	1.78E-07	Increased	2.081	ABHD5,AGK,AGPAT1,AGPAT2,AGPAT6,APOA1,APOA2,C5,CD40,CDIPT,CEPT1,CERS5,CHKA,CHKB,CHPT1,EDN1,ETNK2,F2,FABP3,FGF7,FLT1,GAPVD1,GPAM,GRP,HTR2A,HTR2B,IL1B,IL8,IMPA1,INPP5E,ITGB1,KDR,LCAT,LPCAT2,LYN,MTOR,MYD88,NCS1,NGF,NOX1,NTRK1,PCYT1A,PCYT1B,PCYT2,PDGFA,PDGFRB,PEMT,PI4K2A,PI4KA,PI4KB,PIGO,PIK3C2A,PIK3C2B,PIK3C3,PIK3CA,PIK3CG,PIK3R1,PIKFYVE,PIP5K1A,PIP5K1C,PISD,PITPNM1,PLA2G10,PLA2G4A,PLD1,PLSCR1,PNPLA6…	87
Small Molecule Biochemistry	synthesis	synthesis of phosphatidic acid	1.78E-07	Increased	2.081	ABHD5,AGK,AGPAT1,AGPAT2,AGPAT6,APOA1,APOA2,C5,CD40,CDIPT,CEPT1,CERS5,CHKA,CHKB,CHPT1,EDN1,ETNK2,F2,FABP3,FGF7,FLT1,GAPVD1,GPAM,GRP,HTR2A,HTR2B,IL1B,IL8,IMPA1,INPP5E,ITGB1,KDR,LCAT,LPCAT2,LYN,MTOR,MYD88,NCS1,NGF,NOX1,NTRK1,PCYT1A,PCYT1B,PCYT2,PDGFA,PDGFRB,PEMT,PI4K2A,PI4KA,PI4KB,PIGO,PIK3C2A,PIK3C2B,PIK3C3,PIK3CA,PIK3CG,PIK3R1,PIKFYVE,PIP5K1A,PIP5K1C,PISD,PITPNM1,PLA2G10,PLA2G4A,PLD1,PLSCR1,PNPLA6…	87
Cell Death	cell death	cell death of pheochromocytoma cell lines	1.80E-07		0.811	ADNP,ADORA2A,AGT,AKAP1,ANGPT2,APP,ATF3,ATXN3,BCL2L1,BTG2,CALB1,CASD1,CASP2,CASP3,CAT,CYCS,DDIT4,DHCR24,DNAJB1,DYNLL1,E2F2,EGFR,FAIM,FAS,FGF2,G6PD,GAB1,GAL,GALR2,GEM,GSK3B,HERPUD1,HSPB1,HTT,IL1B,IL1RN,JUN,MAGED1,MAP2K1,MAP3K1,MAPK10,MAPK11,MAPK12,MAPK13,MAPK14,MAPK8,MAPK9,MYC,NCS1,NFKBIA,NGF,NGFR,NOS1,NOS2,NTRK1,PA2G4,PARK2,PPP2R1A,PPP2R1B,PRKCD,PSAP,PSEN2,PTPN6,PTPRF,RPS3,SERPINI1,SHC1 (includes …	79
Cancer	infection	infection of cervical cancer cell lines	1.97E-07	Decreased	-2.132	AASS,ABTB1,ACACB,ACADSB,ADAM10,ADAMTS5,ADRBK1,AFG3L1,AGAP2,AGBL5,ALKBH8,ANKRD43,ANKRD6,ANKRD9,AP2M1,ARGLU1,ARHGAP32,ARHGEF19,ARPC1A,ASXL2,ATG12 (includes EG:361321),ATG16L2,ATOX1,ATP5B,AXL,BAG6,BAHD1,BCLAF1,BCR,BRCA1,C6orf1,CA2,CAMK1D,CAMKK2,CAPN6,CAV2,CCDC134,CCNT1,CCT2,CD4,CD55,CD97,CDC40 (includes EG:361859),CHST1,CHST14,CLDND1,COG2 (includes EG:22796),COG4 (includes EG:102339),CRIM1,CRTC2,CRT…	319
Infectious Disease	infection	infection of cervical cancer cell lines	1.97E-07	Decreased	-2.132	AASS,ABTB1,ACACB,ACADSB,ADAM10,ADAMTS5,ADRBK1,AFG3L1,AGAP2,AGBL5,ALKBH8,ANKRD43,ANKRD6,ANKRD9,AP2M1,ARGLU1,ARHGAP32,ARHGEF19,ARPC1A,ASXL2,ATG12 (includes EG:361321),ATG16L2,ATOX1,ATP5B,AXL,BAG6,BAHD1,BCLAF1,BCR,BRCA1,C6orf1,CA2,CAMK1D,CAMKK2,CAPN6,CAV2,CCDC134,CCNT1,CCT2,CD4,CD55,CD97,CDC40 (includes EG:361859),CHST1,CHST14,CLDND1,COG2 (includes EG:22796),COG4 (includes EG:102339),CRIM1,CRTC2,CRT…	319
Reproductive System Disease	infection	infection of cervical cancer cell lines	1.97E-07	Decreased	-2.132	AASS,ABTB1,ACACB,ACADSB,ADAM10,ADAMTS5,ADRBK1,AFG3L1,AGAP2,AGBL5,ALKBH8,ANKRD43,ANKRD6,ANKRD9,AP2M1,ARGLU1,ARHGAP32,ARHGEF19,ARPC1A,ASXL2,ATG12 (includes EG:361321),ATG16L2,ATOX1,ATP5B,AXL,BAG6,BAHD1,BCLAF1,BCR,BRCA1,C6orf1,CA2,CAMK1D,CAMKK2,CAPN6,CAV2,CCDC134,CCNT1,CCT2,CD4,CD55,CD97,CDC40 (includes EG:361859),CHST1,CHST14,CLDND1,COG2 (includes EG:22796),COG4 (includes EG:102339),CRIM1,CRTC2,CRT…	319
Free Radical Scavenging	synthesis	synthesis of reactive oxygen species	1.99E-07	Increased	3.299	ABCA1,ABCC1,ABL1,ACP5,ADRA1D,AFG3L2,AGER,AGT,AIFM1,AKR1B1,AKT2,ALB,ALDH2,ALOX5,ANGPT2,APOC2,APOE,APP,ARG1,ARHGDIB,BCL2L1,BCR,BNIP3,C5,CALB1,CAMP,CARD9,CASD1,CAT,CAV1,CBS,CCL5,CD14,CD36,CD40,CD47,CDH5,CDKN1A,CEBPE,CLCN3,COL18A1,CRP,CRYAB,CSF1 (includes EG:12977),CSF2,CTTN,CXCL9,CYBA,CYBB,CYP1A1,CYP3A4,DDIT3,DDIT4,DHCR24,DLST,DUOX1,DUOX2,EDN1,EGFR,EPAS1,ESR2,ESRRA,ETS1,ETV6,F2,F2R,F2RL1,FAS,FCER1A,…	219
Cellular Development	development	development of mononuclear leukocytes	2.05E-07	Increased	2.909	ABL1,ADA,ADAM10,ADAM17,ADM,AFF1,AHR,AKT2,AP3B1,AP3D1,APC,ATM,ATP7A,AXL,BAD,BCL2A1,BCL2L1,BCL3,BCL6,BIRC5,BLM,BLNK,BMI1,BMP4,BRCA1,BST1 (includes EG:12182),BTK,CALCB,CARD11,CBL,CCL25,CCND3,CCR7,CD244,CD247,CD274,CD3D,CD3E,CD3G,CD4,CD80 (includes EG:12519),CD83,CD86,CD8A,CDK2,CDKN1A,CDKN1B,CHD4,CHD7,CHEK1,CREB1,CREBBP,CSF1 (includes EG:12977),CSF2,CSK,CTNNB1,CXCR4,CYLD,DEF6,DGKA,DICER1,DLL4,DNAJA3,…	304
Hematological System Development and Function	development	development of mononuclear leukocytes	2.05E-07	Increased	2.909	ABL1,ADA,ADAM10,ADAM17,ADM,AFF1,AHR,AKT2,AP3B1,AP3D1,APC,ATM,ATP7A,AXL,BAD,BCL2A1,BCL2L1,BCL3,BCL6,BIRC5,BLM,BLNK,BMI1,BMP4,BRCA1,BST1 (includes EG:12182),BTK,CALCB,CARD11,CBL,CCL25,CCND3,CCR7,CD244,CD247,CD274,CD3D,CD3E,CD3G,CD4,CD80 (includes EG:12519),CD83,CD86,CD8A,CDK2,CDKN1A,CDKN1B,CHD4,CHD7,CHEK1,CREB1,CREBBP,CSF1 (includes EG:12977),CSF2,CSK,CTNNB1,CXCR4,CYLD,DEF6,DGKA,DICER1,DLL4,DNAJA3,…	304
Hematopoiesis	development	development of mononuclear leukocytes	2.05E-07	Increased	2.909	ABL1,ADA,ADAM10,ADAM17,ADM,AFF1,AHR,AKT2,AP3B1,AP3D1,APC,ATM,ATP7A,AXL,BAD,BCL2A1,BCL2L1,BCL3,BCL6,BIRC5,BLM,BLNK,BMI1,BMP4,BRCA1,BST1 (includes EG:12182),BTK,CALCB,CARD11,CBL,CCL25,CCND3,CCR7,CD244,CD247,CD274,CD3D,CD3E,CD3G,CD4,CD80 (includes EG:12519),CD83,CD86,CD8A,CDK2,CDKN1A,CDKN1B,CHD4,CHD7,CHEK1,CREB1,CREBBP,CSF1 (includes EG:12977),CSF2,CSK,CTNNB1,CXCR4,CYLD,DEF6,DGKA,DICER1,DLL4,DNAJA3,…	304
Lymphoid Tissue Structure and Development	development	development of mononuclear leukocytes	2.05E-07	Increased	2.909	ABL1,ADA,ADAM10,ADAM17,ADM,AFF1,AHR,AKT2,AP3B1,AP3D1,APC,ATM,ATP7A,AXL,BAD,BCL2A1,BCL2L1,BCL3,BCL6,BIRC5,BLM,BLNK,BMI1,BMP4,BRCA1,BST1 (includes EG:12182),BTK,CALCB,CARD11,CBL,CCL25,CCND3,CCR7,CD244,CD247,CD274,CD3D,CD3E,CD3G,CD4,CD80 (includes EG:12519),CD83,CD86,CD8A,CDK2,CDKN1A,CDKN1B,CHD4,CHD7,CHEK1,CREB1,CREBBP,CSF1 (includes EG:12977),CSF2,CSK,CTNNB1,CXCR4,CYLD,DEF6,DGKA,DICER1,DLL4,DNAJA3,…	304
Cellular Function and Maintenance	homeostasis	homeostasis of leukocytes	2.09E-07	Increased	3.458	ABL1,ADA,ADAM17,AFF1,AHR,AKT2,AP3B1,AP3D1,APC,ATM,ATP7A,AXL,BAD,BAK1,BCL2A1,BCL3,BCL6,BIRC5,BLM,BMF,BMI1,BMP4,BRCA1,CALCB,CARD11,CASP3,CBL,CCL25,CCR7,CD244,CD247,CD274,CD3D,CD3E,CD3G,CD4,CD80 (includes EG:12519),CD83,CD86,CD8A,CDK2,CDKN1A,CDKN1B,CHD4,CHD7,CHEK1,CHST3,CORO1A,CREB1,CREBBP,CSF2,CSK,CTNNB1,CXCR4,CYLD,DEF6,DGKA,DICER1,DLL4,DNAJA3,DOK2,DTX1,E2F1,EFNA1,EFNB1,EGR1,EGR3,EIF2AK4,ELK1,ELK4,…	292
Cell Cycle	G2/M phase	G2/M phase	2.21E-07		-1.006	ABCB1,ANAPC10,ANAPC4,ANAPC5,AR,ATF2,ATF5,ATM,ATR,AURKA,BABAM1,BIRC5,BLM,BMP7,BRCA1,BRCC3,BRE,BRSK1,BRSK2,CCNA2,CCND1,CDC14B,CDC25A,CDC25B,CDC25C,CDC5L,CDH13,CDK1,CDK2,CDKN1A,CDKN2B,CHEK1,CHEK2,CIT,CLSPN,CREM,CSE1L,DPP4,EIF2AK2,ELAC2,FADD,FAM175A,FANCC,FOXM1,FOXO4,GADD45A,GADD45B,GADD45G,GMNN,GORASP2,HDAC1,HMGA1,IGF2,IGFBP5,IL24,IL4 (includes EG:16189),IL4R,IL6,IRS1,JUN,JUNB,KDM5B,LATS1,LATS2,LGAL…	118
Cellular Function and Maintenance	cytostasis	cytostasis	2.24E-07		1.217	ABCC1,ABCC3,ABCG2,ABL1,ADA,ADCY3,ADK,ADORA2A,ADRBK1,AMH,ANP32A,ASB2,BCL6,BCR,BHLHE40,BIRC5,BMP2,BMP4,BMP6,BMP7,BMPR1A,BMPR1B,BMPR2,BRCA1,CAMK2A,CASP2,CASP3,CASP6,CAV1,CBS,CBX2,CCND1,CCND3,CD40,CDCA8,CDH1,CDH5,CDK2AP1,CDK4,CDKN1A,CDKN1B,CDKN2C,CDKN2D,CHEK2,CLU,COL18A1,CRABP2,CSNK2A1,CSNK2B,CTNNB1,CYR61,DAXX,E4F1,EGFR,EIF2AK2,ERBB3,ETS1,FANCC,FAS,FGF1,FGFR1,FHIT,FLT1,FOXO3,GBP2 (includes EG:14469),…	182
Cellular Development	developmental process	developmental process of T lymphocytes	2.31E-07	Increased	2.692	ABL1,ADA,ADAM17,AFF1,AHR,AKT2,AP3B1,AP3D1,APC,ATM,ATP7A,BAD,BCL2A1,BCL3,BCL6,BIRC5,BLM,BMI1,BMP4,BRCA1,C3,CALCB,CARD11,CBL,CBX2,CCL25,CCR6,CCR7,CD244,CD247,CD27,CD274,CD3D,CD3E,CD3G,CD4,CD40,CD80 (includes EG:12519),CD83,CD86,CD8A,CDK2,CDKN1A,CDKN1B,CHD4,CHD7,CHEK1,CREB1,CREBBP,CSF2,CSK,CTNNB1,CXCR4,CYLD,DEF6,DICER1,DLL4,DNAJA3,DOK2,DTX1,E2F1,EFNA1,EFNB1,EGR1,EGR3,EIF2AK4,ELK1,ELK4,EPHA1,EPHA2,ET…	293
Cancer	tumorigenesis	tumorigenesis of cells	2.65E-07		0.835	ADAM17,ADAMTS9,AHR,AKIRIN2,AKT2,ANG,ANGPT2,ANGPTL1,ANGPTL4,APC,ARHGDIG,ARID3A,ARMC10,ARRDC3,ATF3,ATP2C2,BAK1,BCL3,BECN1,BMX,BTK,C3,CAMK2N2,CAPN2,CARD9,CASP2,CASP3,CASP9 (includes EG:100140945),CAST,CAV1,CBL,CCDC88A,CCNA2,CCND1,CCND2,CCND3,CCNE1,CD151,CD274,CD86,CDC25A,CDC37,CDH2,CDK4,CDKN1A,CDKN1C,CDKN2C,CDKN2D,CNN1 (includes EG:1264),COL18A1,COL4A1,COL4A2,CSE1L,CSF2,CSRP3,CST6 (includes EG:1474)…	241
Cellular Function and Maintenance	endocytosis	endocytosis	2.73E-07		0.782	ACTN4,ADD1,ADRB2,ANTXR1,ANXA5,AP1S1,AP2A2,APOBR,APOC2,APOC3,APOE,APP,ARR3 (includes EG:170735),ARRB1,ARRB2,ASGR1,ATP5B,ATP6V0A2,ATP6V1H,AXL,CAV1,CAV2,CAV3,CBL,CBLL1,CCL5,CD163,CD2AP,CD63,CDH13,CDK5,CHRNA7,CLCN5,CLIP3,CLTC,CSF1 (includes EG:12977),CSF2,CTTN,CUBN,CXCL16,CYTH2,DAB2,DENND1A,DNM1,DNM2,DYRK1A,EGFR,EHD2,EPN2,EPS15,F2RL1,FCGR1A,FMR1,GAK,GAPVD1,HFE,HGS,HIP1 (includes EG:176224),HIP1R,HTT,…	145
Cancer	adenocarcinoma	adenocarcinoma	2.74E-07		-0.469	A1BG,ABCB11,ABCC3,ABCG2,ABL1,ACAT1,ACTG2,ADAMTS1,ADAMTS5,ADH1C (includes EG:11522),AGPAT2,AHR,AKT3 (includes EG:10000),ALB,ALDOA,ALDOC,AMBP,AMOT,AMY2A,ANGPT1,ANPEP,ANTXR2,APOE,APOLD1,AR,ARL4C,ATP8B1,AURKA,AURKB,BAD,BCL10,BCR,BNC1,BNC2,BRAF,BRCA1,BTRC,BUB1B,C11orf9,C13orf15,C19orf2,C1S,C2orf88,C8orf84,C9,C9orf86,CA9,CACNA1A,CALB2,CALCOCO2,CAV1,CBX7,CCNA2,CCND1,CCND3,CD14,CD48,CD80 (includes EG:125…	427
Cellular Development	differentiation	differentiation of leukocytes	2.92E-07	Increased	3.009	ABL1,ADA,ADAM17,AGER,AHR,AKT2,AP3B1,AP3D1,APC,APP,ATM,ATP7A,AXL,B4GALNT1,BAD,BCL2A1,BCL2L1,BCL3,BCL6,BCR,BLM,BLNK,BMI1,BMP2,BMP4,BMPR1A,BTK,C1QC,CAMP,CARD11,CASP8,CBFA2T3,CBFB,CCR7,CD14,CD274,CD3D,CD3E,CD4,CD40,CD47,CD80 (includes EG:12519),CD86,CD8A,CDK6,CDKN1B,CDKN2D,CEBPD,CEBPE,CHD7,CITED2,CLEC11A,CRTC2,CSF1 (includes EG:12977),CSF1R,CSF2,CSF2RB,CTBP1,CTNNB1,CTNNBIP1,CUL4A,CXCR4,DCLRE1C,DEF6,D…	339
Hematological System Development and Function	differentiation	differentiation of leukocytes	2.92E-07	Increased	3.009	ABL1,ADA,ADAM17,AGER,AHR,AKT2,AP3B1,AP3D1,APC,APP,ATM,ATP7A,AXL,B4GALNT1,BAD,BCL2A1,BCL2L1,BCL3,BCL6,BCR,BLM,BLNK,BMI1,BMP2,BMP4,BMPR1A,BTK,C1QC,CAMP,CARD11,CASP8,CBFA2T3,CBFB,CCR7,CD14,CD274,CD3D,CD3E,CD4,CD40,CD47,CD80 (includes EG:12519),CD86,CD8A,CDK6,CDKN1B,CDKN2D,CEBPD,CEBPE,CHD7,CITED2,CLEC11A,CRTC2,CSF1 (includes EG:12977),CSF1R,CSF2,CSF2RB,CTBP1,CTNNB1,CTNNBIP1,CUL4A,CXCR4,DCLRE1C,DEF6,D…	339
Hematopoiesis	differentiation	differentiation of leukocytes	2.92E-07	Increased	3.009	ABL1,ADA,ADAM17,AGER,AHR,AKT2,AP3B1,AP3D1,APC,APP,ATM,ATP7A,AXL,B4GALNT1,BAD,BCL2A1,BCL2L1,BCL3,BCL6,BCR,BLM,BLNK,BMI1,BMP2,BMP4,BMPR1A,BTK,C1QC,CAMP,CARD11,CASP8,CBFA2T3,CBFB,CCR7,CD14,CD274,CD3D,CD3E,CD4,CD40,CD47,CD80 (includes EG:12519),CD86,CD8A,CDK6,CDKN1B,CDKN2D,CEBPD,CEBPE,CHD7,CITED2,CLEC11A,CRTC2,CSF1 (includes EG:12977),CSF1R,CSF2,CSF2RB,CTBP1,CTNNB1,CTNNBIP1,CUL4A,CXCR4,DCLRE1C,DEF6,D…	339
Cell Death	cell death	cell death of bone cancer cell lines	3.02E-07		-1.336	ABCG2,ABL1,ARRB2,ATG10 (includes EG:641330),ATG5 (includes EG:11793),ATMIN,ATR,AXIN1,BAG6,BCL6,BCLAF1,BHLHE40,BIRC5,BMP2,BMPR1B,BNIP3,BRCA1,CABLES2,CAPNS1,CASP8,CASP9 (includes EG:100140945),CAV1,CDC7 (includes EG:12545),CDH1,CDK6,CDKN1A,CFLAR,CHEK1,DCTN3,DKK3,DNAJA3,DPP4,DPP8,E2F1,E2F3,ERG,ETHE1,ETS1,EWSR1,FAS,FLI1,GNB2L1,GPS2,HCK,HDAC5,HMGA1,HUWE1,IGFBP5,KITLG,LAMP1,LAMP2,MAD1L1,MCL1,MDC1,MDM4,…	97
Cell Signaling	activation	activation of enzyme	3.12E-07		0.759	ADAM9,ADCY3,ADCY4,ADCY7,ADCY9,ADORA2A,ADORA2B,ADRA2B,ADRB1,ADRB2,AGT,AIFM1,AIFM3,AKT1S1,ALK,ALS2,ANG,APC,APH1A,ARHGAP6,ARL1,ARRB1,ASAP2,ATP7A,AVPI1,AXIN1,BAD,BAK1,BCL10,BMP4,C1QTNF2,C5,C9,CALCB,CAMKK1,CAP2,CASP3,CASP4,CASP9 (includes EG:100140945),CAV3,CD4,CDC25B,CDK5,CDK5RAP1,CDKN1A,CDKN1B,CHRM1,CHRNA7,CISH,COL4A3,CRHR1,CRK,CSF1 (includes EG:12977),CSPG4,CTAGE5,CTSA,CXCR4,CYB5B,CYCS,DAB2IP,DAP,D…	254
Carbohydrate Metabolism	synthesis	synthesis of polysaccharide	3.16E-07		0.498	ACADM,Acan,ADRA1B,ADRBK1,AKT2,ANGPT1,APOE,ASPN,B3GALT6,B3GAT3,B4GALNT1,C1QTNF2,CCND3,CD40,CHST11,CHST12,CHST13,CHST3,CHST6,CHSY1,CSF1 (includes EG:12977),CSF1R,CSGALNACT1,CSGALNACT2,CTGF,CTNNB1,DSE,DYRK2,ENPP1,EXT1,EXT2,FGF2,FOXL1,GALNT5,GCK,GCNT2,GCNT3,GFPT1,GLCE,GPAM,GRB10,GSK3A,GSK3B,GYG1,GYS2,H6PD,HAS3,HS2ST1,HS3ST3B1,HS6ST1,IGF1R,IGF2,IGFBP3,IL18 (includes EG:16173),IL1A,IL1B,IL1R2,IL1RN,IL4…	95
Lipid Metabolism	oxidation	oxidation of lipid	3.26E-07		1.969	ABCD1,ABCD3,ABHD5,ACAA2,ACACB,ACADL,ACADM,ACADS,ACADSB,ACADVL,ACOX1,ACOX2,ACOX3,ACSL1,ACSL3,ACSL4,ACSL5,ACSL6,ADH1C (includes EG:11522),ADH5 (includes EG:11532),ADIPOR1,ADIPOR2,AKT2,ALDH1A1,ALOX12,AOX1,APOA1,APOA2,APOE,APP,APPL1,BDH2 (includes EG:295458),C1QTNF2,C3,CD36,CPT1A,CPT1B,CPT1C,CPT2,CYP19A1,CYP1A1,CYP1B1,CYP2C9,CYP3A4,CYP3A5,DECR1,ECHS1,ECI1,ECI2,EHHADH,EPAS1,ESRRA,FABP2,FABP3,GCDH,GOT2…	115
Small Molecule Biochemistry	oxidation	oxidation of lipid	3.26E-07		1.969	ABCD1,ABCD3,ABHD5,ACAA2,ACACB,ACADL,ACADM,ACADS,ACADSB,ACADVL,ACOX1,ACOX2,ACOX3,ACSL1,ACSL3,ACSL4,ACSL5,ACSL6,ADH1C (includes EG:11522),ADH5 (includes EG:11532),ADIPOR1,ADIPOR2,AKT2,ALDH1A1,ALOX12,AOX1,APOA1,APOA2,APOE,APP,APPL1,BDH2 (includes EG:295458),C1QTNF2,C3,CD36,CPT1A,CPT1B,CPT1C,CPT2,CYP19A1,CYP1A1,CYP1B1,CYP2C9,CYP3A4,CYP3A5,DECR1,ECHS1,ECI1,ECI2,EHHADH,EPAS1,ESRRA,FABP2,FABP3,GCDH,GOT2…	115
Energy Production	oxidation	oxidation of lipid	3.26E-07		1.969	ABCD1,ABCD3,ABHD5,ACAA2,ACACB,ACADL,ACADM,ACADS,ACADSB,ACADVL,ACOX1,ACOX2,ACOX3,ACSL1,ACSL3,ACSL4,ACSL5,ACSL6,ADH1C (includes EG:11522),ADH5 (includes EG:11532),ADIPOR1,ADIPOR2,AKT2,ALDH1A1,ALOX12,AOX1,APOA1,APOA2,APOE,APP,APPL1,BDH2 (includes EG:295458),C1QTNF2,C3,CD36,CPT1A,CPT1B,CPT1C,CPT2,CYP19A1,CYP1A1,CYP1B1,CYP2C9,CYP3A4,CYP3A5,DECR1,ECHS1,ECI1,ECI2,EHHADH,EPAS1,ESRRA,FABP2,FABP3,GCDH,GOT2…	115
Cell Death	cell death	cell death of hematopoietic cells	3.76E-07		-0.207	ABCC4 (includes EG:10257),ABL1,ADA,ADORA2A,ADRB1,AGER,AHSP,ATF7,ATM,BAD,BAK1,BCL2L1,BIRC5,BMF,BMP4,BRCA1,BTK,CASP2,CASP3,CASP8,CASP9 (includes EG:100140945),CCL5,CD3E,CD59 (includes EG:25407),CDK2,CDKN1A,CHEK1,CHEK2,CHUK,CRP,CSF2,CTNNB1,CTSB,DDIT4,DFFA,DNAJA3,DNASE2,E2F1,EBAG9,EGR1,EGR3,EPO,ETS2,FADD,FANCC,FAS,FCGR2B,FLI1,FOS,FYN,GATA1,GATA2,GFI1,GFI1B,GZMA,HIPK2,HIST1H1C,HOXA3,ID3 (includes EG:1…	132
Cellular Development	development	development of lymphocytes	4.19E-07	Increased	3.326	ABL1,ADA,ADAM10,ADAM17,AFF1,AHR,AKT2,AP3B1,AP3D1,APC,ATM,ATP7A,AXL,BAD,BCL2A1,BCL2L1,BCL3,BCL6,BIRC5,BLM,BLNK,BMI1,BMP4,BRCA1,BST1 (includes EG:12182),BTK,CALCB,CARD11,CBL,CCL25,CCND3,CCR7,CD244,CD247,CD274,CD3D,CD3E,CD3G,CD4,CD80 (includes EG:12519),CD83,CD86,CD8A,CDK2,CDKN1A,CDKN1B,CHD4,CHD7,CHEK1,CREB1,CREBBP,CSF2,CSK,CTNNB1,CXCR4,CYLD,DEF6,DGKA,DICER1,DLL4,DNAJA3,DOK2,DTX1,E2F1,EBF1,EFNA1,EFN…	299
Hematological System Development and Function	development	development of lymphocytes	4.19E-07	Increased	3.326	ABL1,ADA,ADAM10,ADAM17,AFF1,AHR,AKT2,AP3B1,AP3D1,APC,ATM,ATP7A,AXL,BAD,BCL2A1,BCL2L1,BCL3,BCL6,BIRC5,BLM,BLNK,BMI1,BMP4,BRCA1,BST1 (includes EG:12182),BTK,CALCB,CARD11,CBL,CCL25,CCND3,CCR7,CD244,CD247,CD274,CD3D,CD3E,CD3G,CD4,CD80 (includes EG:12519),CD83,CD86,CD8A,CDK2,CDKN1A,CDKN1B,CHD4,CHD7,CHEK1,CREB1,CREBBP,CSF2,CSK,CTNNB1,CXCR4,CYLD,DEF6,DGKA,DICER1,DLL4,DNAJA3,DOK2,DTX1,E2F1,EBF1,EFNA1,EFN…	299
Hematopoiesis	development	development of lymphocytes	4.19E-07	Increased	3.326	ABL1,ADA,ADAM10,ADAM17,AFF1,AHR,AKT2,AP3B1,AP3D1,APC,ATM,ATP7A,AXL,BAD,BCL2A1,BCL2L1,BCL3,BCL6,BIRC5,BLM,BLNK,BMI1,BMP4,BRCA1,BST1 (includes EG:12182),BTK,CALCB,CARD11,CBL,CCL25,CCND3,CCR7,CD244,CD247,CD274,CD3D,CD3E,CD3G,CD4,CD80 (includes EG:12519),CD83,CD86,CD8A,CDK2,CDKN1A,CDKN1B,CHD4,CHD7,CHEK1,CREB1,CREBBP,CSF2,CSK,CTNNB1,CXCR4,CYLD,DEF6,DGKA,DICER1,DLL4,DNAJA3,DOK2,DTX1,E2F1,EBF1,EFNA1,EFN…	299
Lymphoid Tissue Structure and Development	development	development of lymphocytes	4.19E-07	Increased	3.326	ABL1,ADA,ADAM10,ADAM17,AFF1,AHR,AKT2,AP3B1,AP3D1,APC,ATM,ATP7A,AXL,BAD,BCL2A1,BCL2L1,BCL3,BCL6,BIRC5,BLM,BLNK,BMI1,BMP4,BRCA1,BST1 (includes EG:12182),BTK,CALCB,CARD11,CBL,CCL25,CCND3,CCR7,CD244,CD247,CD274,CD3D,CD3E,CD3G,CD4,CD80 (includes EG:12519),CD83,CD86,CD8A,CDK2,CDKN1A,CDKN1B,CHD4,CHD7,CHEK1,CREB1,CREBBP,CSF2,CSK,CTNNB1,CXCR4,CYLD,DEF6,DGKA,DICER1,DLL4,DNAJA3,DOK2,DTX1,E2F1,EBF1,EFNA1,EFN…	299
Cellular Function and Maintenance	homeostasis	Lymphocyte homeostasis	4.32E-07	Increased	3.458	ABL1,ADA,ADAM17,AFF1,AHR,AKT2,AP3B1,AP3D1,APC,ATM,ATP7A,AXL,BAD,BAK1,BCL2A1,BCL3,BCL6,BIRC5,BLM,BMF,BMI1,BMP4,BRCA1,CALCB,CARD11,CASP3,CBL,CCL25,CCR7,CD244,CD247,CD274,CD3D,CD3E,CD3G,CD4,CD80 (includes EG:12519),CD83,CD86,CD8A,CDK2,CDKN1A,CDKN1B,CHD4,CHD7,CHEK1,CHST3,CORO1A,CREB1,CREBBP,CSF2,CSK,CTNNB1,CXCR4,CYLD,DEF6,DGKA,DICER1,DLL4,DNAJA3,DOK2,DTX1,E2F1,EFNA1,EFNB1,EGR1,EGR3,EIF2AK4,ELK1,ELK4,…	287
Developmental Disorder	hypertrophy	hypertrophy of cells	4.36E-07	Increased	2.057	ABL1,ADRB1,ADRB2,AGT,ALOX15,ANGPT2,APP,AR,ARAF,ATM,BCR,BDNF,BMP2,BMPR1A,BMX,CACNA1H,CAMK2D,CAT,CAV1,CAV3,CDK4,CDKN1B,COL9A2,CRYAB,CSRP3,CTF1,CTSB,CTSC,CTSD,CYP19A1,DICER1,DNAJC3,DUSP1,DYRK1A,EDN1,EEF1D,EPAS1,FBXO32,FGF2,FLNB,FOXO3,FSTL3,GAL,GDNF,GFAP,GLRX3,GNAQ,GPX3,GRP,GSK3B,H2AFZ,HBEGF,HCK,HDAC2,HDAC5,HDAC9,HPRT1,HSPB8,IL18 (includes EG:16173),IL1B,IL4 (includes EG:16189),INHA,INHBA,JAK2,JUN,LC…	140
Cellular Function and Maintenance	homeostasis	T cell homeostasis	4.39E-07	Increased	3.281	ABL1,ADA,ADAM17,AFF1,AHR,AKT2,AP3B1,AP3D1,APC,ATM,ATP7A,BAD,BCL2A1,BCL3,BCL6,BIRC5,BLM,BMF,BMI1,BMP4,BRCA1,CALCB,CARD11,CASP3,CBL,CCL25,CCR7,CD244,CD247,CD274,CD3D,CD3E,CD3G,CD4,CD80 (includes EG:12519),CD83,CD86,CD8A,CDK2,CDKN1A,CDKN1B,CHD4,CHD7,CHEK1,CHST3,CORO1A,CREB1,CREBBP,CSF2,CSK,CTNNB1,CXCR4,CYLD,DEF6,DICER1,DLL4,DNAJA3,DOK2,DTX1,E2F1,EFNA1,EFNB1,EGR1,EGR3,EIF2AK4,ELK1,ELK4,EPHA1,EPHA2,ET…	275
Hematological System Development and Function	homeostasis	T cell homeostasis	4.39E-07	Increased	3.281	ABL1,ADA,ADAM17,AFF1,AHR,AKT2,AP3B1,AP3D1,APC,ATM,ATP7A,BAD,BCL2A1,BCL3,BCL6,BIRC5,BLM,BMF,BMI1,BMP4,BRCA1,CALCB,CARD11,CASP3,CBL,CCL25,CCR7,CD244,CD247,CD274,CD3D,CD3E,CD3G,CD4,CD80 (includes EG:12519),CD83,CD86,CD8A,CDK2,CDKN1A,CDKN1B,CHD4,CHD7,CHEK1,CHST3,CORO1A,CREB1,CREBBP,CSF2,CSK,CTNNB1,CXCR4,CYLD,DEF6,DICER1,DLL4,DNAJA3,DOK2,DTX1,E2F1,EFNA1,EFNB1,EGR1,EGR3,EIF2AK4,ELK1,ELK4,EPHA1,EPHA2,ET…	275
Cell-mediated Immune Response	homeostasis	T cell homeostasis	4.39E-07	Increased	3.281	ABL1,ADA,ADAM17,AFF1,AHR,AKT2,AP3B1,AP3D1,APC,ATM,ATP7A,BAD,BCL2A1,BCL3,BCL6,BIRC5,BLM,BMF,BMI1,BMP4,BRCA1,CALCB,CARD11,CASP3,CBL,CCL25,CCR7,CD244,CD247,CD274,CD3D,CD3E,CD3G,CD4,CD80 (includes EG:12519),CD83,CD86,CD8A,CDK2,CDKN1A,CDKN1B,CHD4,CHD7,CHEK1,CHST3,CORO1A,CREB1,CREBBP,CSF2,CSK,CTNNB1,CXCR4,CYLD,DEF6,DICER1,DLL4,DNAJA3,DOK2,DTX1,E2F1,EFNA1,EFNB1,EGR1,EGR3,EIF2AK4,ELK1,ELK4,EPHA1,EPHA2,ET…	275
Cellular Function and Maintenance	transmembrane potential	transmembrane potential of mitochondria	4.45E-07		-0.167	ABCD3,ABL1,ADORA2A,AIFM3,AP2A2,APP,ARID1A,ATP2A1,BAK1,BARD1,BCL2L1,BCR,BIRC5,BNIP3,CAMP,CASP2,CASP3,CASP7,CASP8,CASP9 (includes EG:100140945),CAT,CCNT1,CD27,CD4,CD40,CD47,CDK2,CDKN1A,CFLAR,CHEK2,CHMP5,CLEC11A,DDIT3,DFFA,DIABLO,DNAJB1,EBAG9,EPO,ESR2,FADD,FAS,FGF2,FXN,GPD2,GPR132,GSN,GZMA,GZMK,GZMM,HERPUD1,HGF,HSF1 (includes EG:15499),HSPA4,HSPB1,HTT,ICAM1,IFI6,IKBKB,IL1B,IL4 (includes EG:16189),IL…	128
Cell Morphology	transmembrane potential	transmembrane potential of mitochondria	4.45E-07		-0.167	ABCD3,ABL1,ADORA2A,AIFM3,AP2A2,APP,ARID1A,ATP2A1,BAK1,BARD1,BCL2L1,BCR,BIRC5,BNIP3,CAMP,CASP2,CASP3,CASP7,CASP8,CASP9 (includes EG:100140945),CAT,CCNT1,CD27,CD4,CD40,CD47,CDK2,CDKN1A,CFLAR,CHEK2,CHMP5,CLEC11A,DDIT3,DFFA,DIABLO,DNAJB1,EBAG9,EPO,ESR2,FADD,FAS,FGF2,FXN,GPD2,GPR132,GSN,GZMA,GZMK,GZMM,HERPUD1,HGF,HSF1 (includes EG:15499),HSPA4,HSPB1,HTT,ICAM1,IFI6,IKBKB,IL1B,IL4 (includes EG:16189),IL…	128
Free Radical Scavenging	production	production of reactive oxygen species	4.51E-07	Increased	3.097	ABCC1,ABL1,AFG3L2,AGER,AGT,AIFM1,AKR1B1,AKT2,ALOX5,ANGPT2,APOC2,APOE,APP,ARG1,ARHGDIB,BCL2L1,BCR,C5,CALB1,CAMP,CARD9,CASD1,CAT,CAV1,CBS,CCL5,CD14,CD36,CD40,CDH5,CDKN1A,CEBPE,COL18A1,CRP,CSF1 (includes EG:12977),CSF2,CTTN,CXCL9,CYBA,CYBB,CYP1A1,CYP3A4,DDIT3,DLST,DUOX1,EDN1,EGFR,ESR2,ESRRA,ETS1,F2,F2R,F2RL1,FAS,FCER1A,FGF2,FGR,FTH1 (includes EG:14319),FTL,FYN,GCH1,GGT1,GNB2L1,GZMA,GZMK,GZMM,HCK,HMO…	168
Free Radical Scavenging	metabolism	metabolism of reactive oxygen species	4.56E-07	Increased	3.489	ABCA1,ABCC1,ABCG2,ABL1,ACP5,ADRA1D,AFG3L2,AGER,AGT,AIFM1,AKR1B1,AKT2,ALB,ALDH2,ALOX5,ANGPT2,APOA4,APOC2,APOE,APP,ARG1,ARHGDIB,ATP7A,BCL2L1,BCR,BNIP3,C5,CALB1,CAMP,CARD9,CASD1,CAT,CAV1,CBS,CCL5,CD14,CD36,CD40,CD47,CDH5,CDKN1A,CEBPE,CLCN3,COL18A1,CRP,CRYAB,CSF1 (includes EG:12977),CSF2,CTTN,CXCL9,CYB5R4,CYBA,CYBB,Cyct,CYGB,CYP1A1,CYP3A4,DDIT3,DDIT4,DHCR24,DLST,DUOX1,DUOX2,EDN1,EGFR,EPAS1,ESR2,ESRRA…	234
Cellular Movement	cell movement	cell movement of blood cells	4.67E-07	Increased	3.143	ABCC1,ABL1,ACTN4,ADA,ADAM10,ADAM17,ADM,ADORA2A,ADRB2,ADRBK1,AGER,AGT,AHR,AIMP1,AKT2,ALB,ALOX15,ALOX5,ALOX5AP,AMICA1,ANGPT2,APOA1,APOE,APP,ARHGAP1,ARHGEF1,ARHGEF6,ARRB1,ARRB2,B4GALT1,BAG4,BCAR1,BCR,BDNF,BGN,BMPR1A,BMPR2,BTK,C1GALT1,C2,C3,C3AR1,C5,CAMK1D,CAMP,CARD9,CAST,CBFB,CBL,CBLB,CCBP2,CCDC88A,CCL16,CCL17,CCL20,CCL22,CCL25,CCL28,CCL5,CCND1,CCNT1,CCR10,CCR4,CCR6,CCR7,CCR8,CD14,CD151,CD200,CD207,…	487
Cancer	non-Hodgkin's disease	non-Hodgkin's disease	4.72E-07		0.357	ABCA7,ABL1,ADA,ADORA2A,AKT2,AKT3 (includes EG:10000),ALK,AMY2A,ATM,AURKB,BCL10,BCL2L1,BCL3,BCL6,BCR,BIRC5,BRD2,BTG1,BTG2,CARD11,CCND3,CCR7,CD247,CD3D,CD3E,CD3G,CD40,CD58,CDK2,CDK4,CDK6,CDK7,CDKN1B,CDKN2C,CFLAR,CHEK1,CIITA,COL3A1,COL4A1,COL4A2,CREBBP,CSE1L,CSF2RB,CSTF3,CXCL9,CXCR3,CXCR4,CYR61,DCLRE1C,DCN,DDB2,DHFR,DMTF1,DNMT3B,DPP4,DTX1,E2F1,E2F2,EGR1,EIF2AK1,EIF4E,EIF4EBP1,EPHA2,EPO,EPOR,ETS1,ETV…	220
Hematological Disease	non-Hodgkin's disease	non-Hodgkin's disease	4.72E-07		0.357	ABCA7,ABL1,ADA,ADORA2A,AKT2,AKT3 (includes EG:10000),ALK,AMY2A,ATM,AURKB,BCL10,BCL2L1,BCL3,BCL6,BCR,BIRC5,BRD2,BTG1,BTG2,CARD11,CCND3,CCR7,CD247,CD3D,CD3E,CD3G,CD40,CD58,CDK2,CDK4,CDK6,CDK7,CDKN1B,CDKN2C,CFLAR,CHEK1,CIITA,COL3A1,COL4A1,COL4A2,CREBBP,CSE1L,CSF2RB,CSTF3,CXCL9,CXCR3,CXCR4,CYR61,DCLRE1C,DCN,DDB2,DHFR,DMTF1,DNMT3B,DPP4,DTX1,E2F1,E2F2,EGR1,EIF2AK1,EIF4E,EIF4EBP1,EPHA2,EPO,EPOR,ETS1,ETV…	220
Cellular Movement	cell movement	cell movement of fibroblasts	4.86E-07		0.620	ABL1,ABL2,AGER,AGT,AKT2,APOE,ARHGAP35,BCAR1,BMP7,CALCRL,CAPNS1,CAV1,CCND1,CDKN1A,CDKN1B,CHUK,CTNNB1,CYSLTR2,DAPK3,DDR2 (includes EG:18214),EZR,FGF1,FGF2,FLNB,GNA12,GNA13,GSN,HBEGF,HGF,IGBP1,IGF2R,IKBKB,IL16,IL1B,ITGB1,ITGB1BP1,ITGB3,LPAR1,LPP,LRPAP1,MAP2K1,MAP3K1,MAP3K8,MAPK14,MAPKAPK2,MRAS,MRC2,MYC,NCK1,NCK2,NFKB2,PIP5K1A,PLAU,PLAUR,PRKACA,PRKAR1A,PRKCD,PTEN,PTPN11,PTPN2,PTPRA,PXN,RAC1,RAC2,RAMP…	90
Connective Tissue Development and Function	cell movement	cell movement of fibroblasts	4.86E-07		0.620	ABL1,ABL2,AGER,AGT,AKT2,APOE,ARHGAP35,BCAR1,BMP7,CALCRL,CAPNS1,CAV1,CCND1,CDKN1A,CDKN1B,CHUK,CTNNB1,CYSLTR2,DAPK3,DDR2 (includes EG:18214),EZR,FGF1,FGF2,FLNB,GNA12,GNA13,GSN,HBEGF,HGF,IGBP1,IGF2R,IKBKB,IL16,IL1B,ITGB1,ITGB1BP1,ITGB3,LPAR1,LPP,LRPAP1,MAP2K1,MAP3K1,MAP3K8,MAPK14,MAPKAPK2,MRAS,MRC2,MYC,NCK1,NCK2,NFKB2,PIP5K1A,PLAU,PLAUR,PRKACA,PRKAR1A,PRKCD,PTEN,PTPN11,PTPN2,PTPRA,PXN,RAC1,RAC2,RAMP…	90
Cellular Development	differentiation	differentiation of embryonic cells	5.42E-07		-0.544	ACVR1,ADA,AIFM1,BAIAP2,BMP2,BMP4,BMP7,BTG2,CDH1,CDK2AP1,CDKN1B,CDKN1C,CHEK1,CITED2,COL4A1,DAB2,DNMT1,EIF4G2,EPHB4,ERF,EZH2,FGF2,FGF8,FGFR1,FGFR2,FLT1,FOXD3,GAS7,GRB2,HBEGF,HEY2,HEYL,HGF,HHEX,HNF1B,HOPX,HSP90B1,HTT,ID3 (includes EG:15903),IL6ST,JUB,JUN,JUNB,KIT,KITLG,L1CAM,LIF,LIFR,LIMS3L,MAPK14,MAPK3,MAPK8,MAPK8IP3,MAPK9,MDFI,METRN,MNX1,MYC,MZF1,NGFR,NKX2-5,NLE1,NMT1,NODAL,NOG,NR4A2,NRP1 (include…	99
Embryonic Development	differentiation	differentiation of embryonic cells	5.42E-07		-0.544	ACVR1,ADA,AIFM1,BAIAP2,BMP2,BMP4,BMP7,BTG2,CDH1,CDK2AP1,CDKN1B,CDKN1C,CHEK1,CITED2,COL4A1,DAB2,DNMT1,EIF4G2,EPHB4,ERF,EZH2,FGF2,FGF8,FGFR1,FGFR2,FLT1,FOXD3,GAS7,GRB2,HBEGF,HEY2,HEYL,HGF,HHEX,HNF1B,HOPX,HSP90B1,HTT,ID3 (includes EG:15903),IL6ST,JUB,JUN,JUNB,KIT,KITLG,L1CAM,LIF,LIFR,LIMS3L,MAPK14,MAPK3,MAPK8,MAPK8IP3,MAPK9,MDFI,METRN,MNX1,MYC,MZF1,NGFR,NKX2-5,NLE1,NMT1,NODAL,NOG,NR4A2,NRP1 (include…	99
Cellular Movement	migration	leukocyte migration	5.48E-07	Increased	3.154	ABCC1,ABL1,ACTN4,ADA,ADAM10,ADAM17,ADM,ADORA2A,ADRB2,ADRBK1,AGER,AGT,AHR,AIMP1,AKT2,ALB,ALOX15,ALOX5,ALOX5AP,AMICA1,ANGPT2,APOA1,APOE,APP,ARHGAP1,ARHGEF1,ARHGEF6,ARRB1,ARRB2,B4GALT1,BAG4,BCAR1,BCR,BGN,BMPR1A,BMPR2,BTK,C1GALT1,C2,C3,C3AR1,C5,CAMK1D,CAMP,CARD9,CAST,CBFB,CBL,CBLB,CCBP2,CCDC88A,CCL16,CCL17,CCL20,CCL22,CCL25,CCL28,CCL5,CCND1,CCNT1,CCR10,CCR4,CCR6,CCR7,CCR8,CD14,CD151,CD200,CD207,CD274…	486
Immune Cell Trafficking	migration	leukocyte migration	5.48E-07	Increased	3.154	ABCC1,ABL1,ACTN4,ADA,ADAM10,ADAM17,ADM,ADORA2A,ADRB2,ADRBK1,AGER,AGT,AHR,AIMP1,AKT2,ALB,ALOX15,ALOX5,ALOX5AP,AMICA1,ANGPT2,APOA1,APOE,APP,ARHGAP1,ARHGEF1,ARHGEF6,ARRB1,ARRB2,B4GALT1,BAG4,BCAR1,BCR,BGN,BMPR1A,BMPR2,BTK,C1GALT1,C2,C3,C3AR1,C5,CAMK1D,CAMP,CARD9,CAST,CBFB,CBL,CBLB,CCBP2,CCDC88A,CCL16,CCL17,CCL20,CCL22,CCL25,CCL28,CCL5,CCND1,CCNT1,CCR10,CCR4,CCR6,CCR7,CCR8,CD14,CD151,CD200,CD207,CD274…	486
Cell Death	apoptosis	apoptosis of breast cancer cell lines	5.87E-07		-1.815	ADM,AKT2,ALOX15,AMH,ANGPT2,ATF2,ATG5 (includes EG:11793),BAD,BAG3,BAK1,BARD1,BCAR1,BCAS2,BCL10,BCL2L1,BCL2L13,BCL2L2,BECN1,BEX2,BIRC3,BIRC5,BMX,BNIP3,BRCA1,C9orf86,CASP2,CASP3,CASP6,CASP7,CASP8,CASP9 (includes EG:100140945),CAV1,CCND1,CDH1,CDK1,CDKN1A,CFLAR,CHMP5,CLCA2,CLU,CRABP2,CSE1L,CTCF (includes EG:10664),CTGF,CTNNB1,CYCS,CYLD,CYR61,DAB2,DDIT4,DIABLO,DIRAS3,DUSP1,E2F1,EGFR,EPHA2,ETS2,EXOC2,F…	167
Cell Death	cell death	cell death of liver cells	6.61E-07		0.603	ADM,AGER,AHR,APOE,ATF7,ATP2A1,ATR,BAK1,BCL2L1,CASP3,CASP7,CASP8,CASP9 (includes EG:100140945),CD274,CD40,CDKN1A,CDKN1B,CHUK,CIT,CTSB,CYP7A1,DAXX,DDIT3,DICER1,E2F1,EGFR,ENDOG,EPO,FAAH,FADD,FAS,FGL2,FOS,GADD45B,GSK3B,HGF,HMOX1,IER3,IKBKB,IL15 (includes EG:16168),IL1RN,IL27RA,IL2RA,IL4 (includes EG:16189),IL6,IL6ST,INHA,IRF5,ITGAV,ITGB2,ITGB3,JUN,LAMP2,LTBR,MAP2K1,MAP2K4,MAPK14,MAPK3,MAPK8,MAPK9,MCL…	111
Cellular Function and Maintenance	development	T cell development	6.69E-07	Increased	3.288	ABL1,ADA,ADAM17,AFF1,AHR,AKT2,AP3B1,AP3D1,APC,ATM,ATP7A,BAD,BCL2A1,BCL3,BCL6,BIRC5,BLM,BMI1,BMP4,BRCA1,CALCB,CARD11,CBL,CCL25,CCR7,CD244,CD247,CD274,CD3D,CD3E,CD3G,CD4,CD80 (includes EG:12519),CD83,CD86,CD8A,CDK2,CDKN1A,CDKN1B,CHD4,CHD7,CHEK1,CREB1,CREBBP,CSF2,CSK,CTNNB1,CXCR4,CYLD,DEF6,DICER1,DLL4,DNAJA3,DOK2,DTX1,E2F1,EFNA1,EFNB1,EGR1,EGR3,EIF2AK4,ELK1,ELK4,EPHA1,EPHA2,ETS1,ETS2,F5,FADD,FANCC,F…	267
Cellular Development	development	T cell development	6.69E-07	Increased	3.288	ABL1,ADA,ADAM17,AFF1,AHR,AKT2,AP3B1,AP3D1,APC,ATM,ATP7A,BAD,BCL2A1,BCL3,BCL6,BIRC5,BLM,BMI1,BMP4,BRCA1,CALCB,CARD11,CBL,CCL25,CCR7,CD244,CD247,CD274,CD3D,CD3E,CD3G,CD4,CD80 (includes EG:12519),CD83,CD86,CD8A,CDK2,CDKN1A,CDKN1B,CHD4,CHD7,CHEK1,CREB1,CREBBP,CSF2,CSK,CTNNB1,CXCR4,CYLD,DEF6,DICER1,DLL4,DNAJA3,DOK2,DTX1,E2F1,EFNA1,EFNB1,EGR1,EGR3,EIF2AK4,ELK1,ELK4,EPHA1,EPHA2,ETS1,ETS2,F5,FADD,FANCC,F…	267
Hematological System Development and Function	development	T cell development	6.69E-07	Increased	3.288	ABL1,ADA,ADAM17,AFF1,AHR,AKT2,AP3B1,AP3D1,APC,ATM,ATP7A,BAD,BCL2A1,BCL3,BCL6,BIRC5,BLM,BMI1,BMP4,BRCA1,CALCB,CARD11,CBL,CCL25,CCR7,CD244,CD247,CD274,CD3D,CD3E,CD3G,CD4,CD80 (includes EG:12519),CD83,CD86,CD8A,CDK2,CDKN1A,CDKN1B,CHD4,CHD7,CHEK1,CREB1,CREBBP,CSF2,CSK,CTNNB1,CXCR4,CYLD,DEF6,DICER1,DLL4,DNAJA3,DOK2,DTX1,E2F1,EFNA1,EFNB1,EGR1,EGR3,EIF2AK4,ELK1,ELK4,EPHA1,EPHA2,ETS1,ETS2,F5,FADD,FANCC,F…	267
Hematopoiesis	development	T cell development	6.69E-07	Increased	3.288	ABL1,ADA,ADAM17,AFF1,AHR,AKT2,AP3B1,AP3D1,APC,ATM,ATP7A,BAD,BCL2A1,BCL3,BCL6,BIRC5,BLM,BMI1,BMP4,BRCA1,CALCB,CARD11,CBL,CCL25,CCR7,CD244,CD247,CD274,CD3D,CD3E,CD3G,CD4,CD80 (includes EG:12519),CD83,CD86,CD8A,CDK2,CDKN1A,CDKN1B,CHD4,CHD7,CHEK1,CREB1,CREBBP,CSF2,CSK,CTNNB1,CXCR4,CYLD,DEF6,DICER1,DLL4,DNAJA3,DOK2,DTX1,E2F1,EFNA1,EFNB1,EGR1,EGR3,EIF2AK4,ELK1,ELK4,EPHA1,EPHA2,ETS1,ETS2,F5,FADD,FANCC,F…	267
Lymphoid Tissue Structure and Development	development	T cell development	6.69E-07	Increased	3.288	ABL1,ADA,ADAM17,AFF1,AHR,AKT2,AP3B1,AP3D1,APC,ATM,ATP7A,BAD,BCL2A1,BCL3,BCL6,BIRC5,BLM,BMI1,BMP4,BRCA1,CALCB,CARD11,CBL,CCL25,CCR7,CD244,CD247,CD274,CD3D,CD3E,CD3G,CD4,CD80 (includes EG:12519),CD83,CD86,CD8A,CDK2,CDKN1A,CDKN1B,CHD4,CHD7,CHEK1,CREB1,CREBBP,CSF2,CSK,CTNNB1,CXCR4,CYLD,DEF6,DICER1,DLL4,DNAJA3,DOK2,DTX1,E2F1,EFNA1,EFNB1,EGR1,EGR3,EIF2AK4,ELK1,ELK4,EPHA1,EPHA2,ETS1,ETS2,F5,FADD,FANCC,F…	267
Cell-mediated Immune Response	development	T cell development	6.69E-07	Increased	3.288	ABL1,ADA,ADAM17,AFF1,AHR,AKT2,AP3B1,AP3D1,APC,ATM,ATP7A,BAD,BCL2A1,BCL3,BCL6,BIRC5,BLM,BMI1,BMP4,BRCA1,CALCB,CARD11,CBL,CCL25,CCR7,CD244,CD247,CD274,CD3D,CD3E,CD3G,CD4,CD80 (includes EG:12519),CD83,CD86,CD8A,CDK2,CDKN1A,CDKN1B,CHD4,CHD7,CHEK1,CREB1,CREBBP,CSF2,CSK,CTNNB1,CXCR4,CYLD,DEF6,DICER1,DLL4,DNAJA3,DOK2,DTX1,E2F1,EFNA1,EFNB1,EGR1,EGR3,EIF2AK4,ELK1,ELK4,EPHA1,EPHA2,ETS1,ETS2,F5,FADD,FANCC,F…	267
Cancer	ovarian cancer	ovarian cancer	7.14E-07			ABCB1,ABL1,ADA,AFP,AGPAT2,AGR2,AKT2,AKT3 (includes EG:10000),ALCAM,ALDH1A1,ALDH3A1,ANXA10,APOE,AR,ARL4C,ASCL2,ATP6V1B1,ATP8B1,BCL10,BCR,BECN1,BMP7,BNC1,BRAF,BRCA1,BTRC,C11orf9,C13orf15,C19orf2,C2orf88,C8orf84,C9orf86,CACNA1A,CALB2,CALCOCO2,CAMK2N2,CCT5,CDH1,CDK4,CLDN3,CLDN4,CLDN7,CLEC3B,CLU,CMTM4,CMTM8,COL15A1,COL18A1,COL4A1,COX5A (includes EG:12858),CP,CRP,CSF1R,CSF2RB,CTDSPL,CTNNB1,CXCL14,CXCL1…	311
Reproductive System Disease	ovarian cancer	ovarian cancer	7.14E-07			ABCB1,ABL1,ADA,AFP,AGPAT2,AGR2,AKT2,AKT3 (includes EG:10000),ALCAM,ALDH1A1,ALDH3A1,ANXA10,APOE,AR,ARL4C,ASCL2,ATP6V1B1,ATP8B1,BCL10,BCR,BECN1,BMP7,BNC1,BRAF,BRCA1,BTRC,C11orf9,C13orf15,C19orf2,C2orf88,C8orf84,C9orf86,CACNA1A,CALB2,CALCOCO2,CAMK2N2,CCT5,CDH1,CDK4,CLDN3,CLDN4,CLDN7,CLEC3B,CLU,CMTM4,CMTM8,COL15A1,COL18A1,COL4A1,COX5A (includes EG:12858),CP,CRP,CSF1R,CSF2RB,CTDSPL,CTNNB1,CXCL14,CXCL1…	311
Reproductive System Disease	gynecological disorder	gynecological disorder	7.80E-07		-0.990	ABCB1,ABCG2,ABI2,ABL1,ACTC1,ACTG2,ACTR3,ADA,ADAMTS5,ADRB1,ADRB2,ADRBK1,AFP,AGPAT2,AGR2,AHR,AK2,AKAP8L,AKR1B1,AKT2,AKT3 (includes EG:10000),ALCAM,ALDH1A1,ALDH3A1,ALDOA,ALOX5,AMH,AMY2A,ANAPC10,ANTXR2,ANXA10,ANXA5,APOE,APOH,APOLD1,AR,ARFGEF2,ARHGDIB,ARIH2,ARL4C,ARL4D,ARNT,ARSE,ASB5,ASCL2,ASH2L,ATP6V1B1,ATP8B1,ATRN,ATRNL1,ATRX,AURKB,BCL10,BCR,BDH1 (includes EG:100037356),BECN1,BMF,BMP7,BMPR1A,BNC1,BN…	703
Cell Death	cell death	cell death of cerebral cortex cells	7.80E-07		-0.248	ACHE,ADNP,ADRBK1,ALOX15,APOE,APP,ATP13A2,ATP2C1,BAK1,BCL2L2,BDNF,BMP2,CAPNS1,CASP2,CASP3,CASP6,CASP8,CASP9 (includes EG:100140945),CDC25A,CDK4,CDK5,CDKN1A,CDKN1B,CDKN2D,CFLAR,CLU,CRHR1,CTSD,CYCS,DDIT3,EPO,ETS2,F2,FAIM,FAS,FCGR1A,GAL,GAS6,GBA,GCLC,GCLM,GDNF,GNAO1,GSK3B,HIP1 (includes EG:176224),HTRA2,HTT,IL1B,IL1R1,IL1RN,ITPRIP,ITSN1,JUN,KL,KSR1,LRPAP1,MADD,MAOA,MAP1B,MAPK10,MAPK14,NAIP,NCF1,NCS1,…	114
Lipid Metabolism	metabolism	fatty acid metabolism	8.02E-07	Increased	2.695	ABCA1,ABCB1,ABCB11,ABCC1,ABCC2,ABCC3,ABCD3,ABCG1,ABCG2,ABCG5,ACAA1,ACAA2,ACACB,ACADL,ACADSB,ACADVL,ACBD3,ACLY,ACOT12,ACOT4,ACOT7,ACOT9,ACOX1,ACSBG1,ACSBG2,ACSF3,ACSL1,ACSL3,ACSL4,ACSL5,ACSL6,ACSM3,ACSS1,ACSS2,ADRBK1,AGER,AGK,AGPAT6,AGT,ALB,ALDH5A1,ALOX12,ALOX12B,ALOX15,ALOX15B,ALOX5,ALOX5AP,ANGPTL3,ANKRD26,APOA1,APOA2,APOA4,APOC2,APOC3,APOC4,APOD,APOE,APOH,APOL3,APP,ARV1 (includes EG:292097),ASAH…	338
Small Molecule Biochemistry	metabolism	fatty acid metabolism	8.02E-07	Increased	2.695	ABCA1,ABCB1,ABCB11,ABCC1,ABCC2,ABCC3,ABCD3,ABCG1,ABCG2,ABCG5,ACAA1,ACAA2,ACACB,ACADL,ACADSB,ACADVL,ACBD3,ACLY,ACOT12,ACOT4,ACOT7,ACOT9,ACOX1,ACSBG1,ACSBG2,ACSF3,ACSL1,ACSL3,ACSL4,ACSL5,ACSL6,ACSM3,ACSS1,ACSS2,ADRBK1,AGER,AGK,AGPAT6,AGT,ALB,ALDH5A1,ALOX12,ALOX12B,ALOX15,ALOX15B,ALOX5,ALOX5AP,ANGPTL3,ANKRD26,APOA1,APOA2,APOA4,APOC2,APOC3,APOC4,APOD,APOE,APOH,APOL3,APP,ARV1 (includes EG:292097),ASAH…	338
Cell Death	cell death	cell death of hematopoietic progenitor cells	8.08E-07		-0.125	ABCC4 (includes EG:10257),ABL1,ADA,ADORA2A,ADRB1,AGER,AHSP,ATM,BAD,BAK1,BCL2L1,BIRC5,BMF,BMP4,BRCA1,BTK,CASP2,CASP3,CASP8,CASP9 (includes EG:100140945),CCL5,CD3E,CD59 (includes EG:25407),CDK2,CDKN1A,CHEK1,CHEK2,CHUK,CRP,CSF2,CTNNB1,CTSB,DDIT4,DFFA,DNAJA3,DNASE2,E2F1,EBAG9,EGR1,EGR3,EPO,ETS2,FADD,FAS,FCGR2B,FLI1,FOS,FYN,GATA1,GATA2,GFI1,GFI1B,GZMA,HIPK2,HIST1H1C,HOXA3,ID3 (includes EG:15903),IGFBP…	126
Cancer	lung adenocarcinoma	lung adenocarcinoma	8.30E-07		0.971	ADH1C (includes EG:11522),ALDOA,ALDOC,ANGPT1,BRAF,BUB1B,CAV1,CCNA2,CCND3,CDC20,CDC6 (includes EG:23834),CDCA5,CDK1,CDKN1B,CDKN1C,CDKN2C,CKS1B,CLDN3,CTNNB1,DICER1,E2F1,EGFR,EIF2C1,EIF2C2,EIF4A1,ENO1,EPAS1,ERBB3,FANCD2,FHIT,FOXM1,FOXO3,GADD45B,GAS1 (includes EG:14451),GPI,HTATIP2,IMPDH2,KDR,KIF11,KRAS,LCN2,LDHA,LOX,MAGED1,MEN1,NQO1,NRAS,PCNA,PFKP,PRKRA,PTEN,PTGES,PTPN11,PVRL4,RCC1,RFC4,RNF5,SMEK1,S…	75
Genetic Disorder	lung adenocarcinoma	lung adenocarcinoma	8.30E-07		0.971	ADH1C (includes EG:11522),ALDOA,ALDOC,ANGPT1,BRAF,BUB1B,CAV1,CCNA2,CCND3,CDC20,CDC6 (includes EG:23834),CDCA5,CDK1,CDKN1B,CDKN1C,CDKN2C,CKS1B,CLDN3,CTNNB1,DICER1,E2F1,EGFR,EIF2C1,EIF2C2,EIF4A1,ENO1,EPAS1,ERBB3,FANCD2,FHIT,FOXM1,FOXO3,GADD45B,GAS1 (includes EG:14451),GPI,HTATIP2,IMPDH2,KDR,KIF11,KRAS,LCN2,LDHA,LOX,MAGED1,MEN1,NQO1,NRAS,PCNA,PFKP,PRKRA,PTEN,PTGES,PTPN11,PVRL4,RCC1,RFC4,RNF5,SMEK1,S…	75
Respiratory Disease	lung adenocarcinoma	lung adenocarcinoma	8.30E-07		0.971	ADH1C (includes EG:11522),ALDOA,ALDOC,ANGPT1,BRAF,BUB1B,CAV1,CCNA2,CCND3,CDC20,CDC6 (includes EG:23834),CDCA5,CDK1,CDKN1B,CDKN1C,CDKN2C,CKS1B,CLDN3,CTNNB1,DICER1,E2F1,EGFR,EIF2C1,EIF2C2,EIF4A1,ENO1,EPAS1,ERBB3,FANCD2,FHIT,FOXM1,FOXO3,GADD45B,GAS1 (includes EG:14451),GPI,HTATIP2,IMPDH2,KDR,KIF11,KRAS,LCN2,LDHA,LOX,MAGED1,MEN1,NQO1,NRAS,PCNA,PFKP,PRKRA,PTEN,PTGES,PTPN11,PVRL4,RCC1,RFC4,RNF5,SMEK1,S…	75
Post-Translational Modification	tetramerization	tetramerization of protein	9.19E-07			AASS,ACADL,ACADM,ACADS,ACHE,ACOT13,ACTN2,ADSL,ALDH1A1,ALDH5A1,ALDOC,CAT,CBR4,CCL5,CDA,CRYZ,CTH,CUTC,DCTPP1,DECR1,DHPS,DPYS,GFPT1,GNMT,GPX3,HPRT1,HSD17B10,IDE,IGF1R,IMPDH2,INSR,KCNJ10,ME1,MTMR2,NLGN1,PCBD1,PDSS1,PDSS2,PEX5,PFKL,PFKM,PFKP,PPAT,RRM2,SHMT1,SHMT2,SOD2,SRR,TGM3,TH,TK1,TP53 (includes EG:22059),TP63,TRPM8,TXNRD1,USP16	56
Protein Synthesis	tetramerization	tetramerization of protein	9.19E-07			AASS,ACADL,ACADM,ACADS,ACHE,ACOT13,ACTN2,ADSL,ALDH1A1,ALDH5A1,ALDOC,CAT,CBR4,CCL5,CDA,CRYZ,CTH,CUTC,DCTPP1,DECR1,DHPS,DPYS,GFPT1,GNMT,GPX3,HPRT1,HSD17B10,IDE,IGF1R,IMPDH2,INSR,KCNJ10,ME1,MTMR2,NLGN1,PCBD1,PDSS1,PDSS2,PEX5,PFKL,PFKM,PFKP,PPAT,RRM2,SHMT1,SHMT2,SOD2,SRR,TGM3,TH,TK1,TP53 (includes EG:22059),TP63,TRPM8,TXNRD1,USP16	56
Cellular Assembly and Organization	formation	formation of actin filaments	9.93E-07		0.518	ACTR3,AKAP1,AMOT,AR,ARAP1,ARHGAP32,ARHGAP6,ARHGEF1,ARHGEF10,ARHGEF10L,ARHGEF11,ARHGEF2,ARHGEF3,ARPC2,ARRB1,BAG4,BCAR1,BDKRB2,BRAF,BRK1,C3AR1,Cald1,CAV1,CDC42EP2,CDC42EP5,CFL1,CHCHD2,CHRM1,CNTNAP1,COL18A1,CORO1A,CTGF,CTNND1,CUL3 (includes EG:26554),DSTN,EDN1,EDNRA,EGFR,ELN,F2,F2R,FBLIM1,FER,FGF2,GALR2,GAS7,GNA11,GNA12,GNA13,GNAI2,GNAO1,GNAQ,GNB1,GNG2,GNG5,GNG7,GPI,GPR65,GRP,GSN,HAX1,HDAC6,HGF,IKBK…	152
Cellular Assembly and Organization	formation	formation of actin stress fibers	1.04E-06		0.444	AKAP1,AMOT,AR,ARAP1,ARHGAP32,ARHGAP6,ARHGEF1,ARHGEF10,ARHGEF10L,ARHGEF11,ARHGEF2,ARHGEF3,ARRB1,BAG4,BCAR1,BDKRB2,BRAF,BRK1,C3AR1,Cald1,CAV1,CHCHD2,CHRM1,CNTNAP1,COL18A1,CTGF,CTNND1,CUL3 (includes EG:26554),EDN1,EDNRA,EGFR,ELN,F2,F2R,FBLIM1,FGF2,GALR2,GNA11,GNA12,GNA13,GNAI2,GNAO1,GNAQ,GNB1,GNG2,GNG5,GNG7,GPI,GPR65,GRP,HAX1,HDAC6,HGF,IKBKB,IL1A,IL8,ITGA3,ITGB1,JAG1,KANK2,KANK3,KANK4,KCTD13,KRAS,LI…	120
Cancer	metastasis	metastasis	1.12E-06		-0.171	ABCB1,ABL1,ACHE,ACTB,ADAM17,ADRA1B,ADRA1D,ADRB1,ADRB2,AHR,AHSG,AKAP12,AKIRIN2,AKT2,AKT3 (includes EG:10000),ANGPT2,ANGPTL1,ANGPTL2,ANGPTL4,ANPEP,APOE,ARAF,ARHGDIG,ARRB2,ASGR1,ATF3,AXL,B3GNT1,BCR,BIRC5,BRAF,C10orf116,C9orf167,CAPG,CAPN2,CASP3,CAV1,CCDC88A,CCND2,CCR4,CD151,CD274,CD36,CD40,CD47,CD80 (includes EG:12519),CD86,CD9,CDC25A,CDCA7L,CDH1,CDH2,CDH6,CDK5,CDKN2C,CEBPD,CFLAR,CHRM1,CHRM4,CHRM5,C…	352
Cell Cycle	mitosis	mitosis of tumor cell lines	1.16E-06		1.424	ACRBP,ATM,ATR,AURKA,BIRC5,BMP2,BMP4,BMP6,BMP7,BRCA1,CCNE1,CDC20,CDC25A,CDC25B,CDC25C,CDC7 (includes EG:12545),CDCA8,CDK1,CDKN1A,CDKN1B,CENPI,CHEK1,CSE1L,CYLD,DCTN1,DLGAP5,EIF3E,EWSR1,FLI1,FOXM1,GNAI3,GRN,HDAC4,HMG20B,IL6,INHBA,JUB,MAD2L1BP,MAPK14,MAPK7,MASTL,MATK,NAE1,NEK7,NUDCD3,NUMA1,PKMYT1,PLK1,PRPF4,PTTG1,RAD21,RIC8A,SACM1L,SIAH1,SPC25 (includes EG:100144563),SYK,TCP1,TOP2A,TP53 (includes EG:…	64
Cellular Growth and Proliferation	growth	growth of fibroblast cell lines	1.21E-06		-1.136	ABL1,ABL2,AHR,AKAP12,ANP32A,ATM,BCAR1,BMP4,BRCA1,CAST,CAV1,CBL,CCND1,CCND2,CCND3,CCNE1,CDC14B,CDH13,CDK2,CDK4,CDK6,CDKN1A,CDKN1B,CDKN2B,CES2,COL1A1,CRK,CSF2RB,CSNK2B,CTNNB1,CUL7,DDX3X,DMTF1,E2F1,E2F2,E2F3,E2F4,EEF1D,EGFR,EIF2AK2,EIF3B,EIF3H,EIF3I,EIF6,ERBB3,ERRFI1,ETV6,EWSR1,F2R,FBXW7,FGF1,FGF18,FGF2,FLI1,FOS,FOXM1,GADD45B,GADD45G,GADD45GIP1,GAK,GBP2 (includes EG:14469),GNB2L1,GRID2,GRN,HBEGF,HMG…	161
Cellular Development	growth	growth of fibroblast cell lines	1.21E-06		-1.136	ABL1,ABL2,AHR,AKAP12,ANP32A,ATM,BCAR1,BMP4,BRCA1,CAST,CAV1,CBL,CCND1,CCND2,CCND3,CCNE1,CDC14B,CDH13,CDK2,CDK4,CDK6,CDKN1A,CDKN1B,CDKN2B,CES2,COL1A1,CRK,CSF2RB,CSNK2B,CTNNB1,CUL7,DDX3X,DMTF1,E2F1,E2F2,E2F3,E2F4,EEF1D,EGFR,EIF2AK2,EIF3B,EIF3H,EIF3I,EIF6,ERBB3,ERRFI1,ETV6,EWSR1,F2R,FBXW7,FGF1,FGF18,FGF2,FLI1,FOS,FOXM1,GADD45B,GADD45G,GADD45GIP1,GAK,GBP2 (includes EG:14469),GNB2L1,GRID2,GRN,HBEGF,HMG…	161
Connective Tissue Development and Function	growth	growth of fibroblast cell lines	1.21E-06		-1.136	ABL1,ABL2,AHR,AKAP12,ANP32A,ATM,BCAR1,BMP4,BRCA1,CAST,CAV1,CBL,CCND1,CCND2,CCND3,CCNE1,CDC14B,CDH13,CDK2,CDK4,CDK6,CDKN1A,CDKN1B,CDKN2B,CES2,COL1A1,CRK,CSF2RB,CSNK2B,CTNNB1,CUL7,DDX3X,DMTF1,E2F1,E2F2,E2F3,E2F4,EEF1D,EGFR,EIF2AK2,EIF3B,EIF3H,EIF3I,EIF6,ERBB3,ERRFI1,ETV6,EWSR1,F2R,FBXW7,FGF1,FGF18,FGF2,FLI1,FOS,FOXM1,GADD45B,GADD45G,GADD45GIP1,GAK,GBP2 (includes EG:14469),GNB2L1,GRID2,GRN,HBEGF,HMG…	161
Cellular Development	differentiation	differentiation of connective tissue cells	1.22E-06		1.085	ACVR1,ACVR2A,ACVR2B,ADIG,ADK,ADRB1,ADRB2,AKT2,ALDH6A1,APC,ARL4A,ATF2,ATF4,AXIN1,BGLAP,BMP2,BMP3,BMP4,BMP6,BMP7,BMPR1A,BMPR1B,BMPR2,C10orf58,C14orf169,C3,C3AR1,C5,CA2,CAPNS1,CARM1,CASP3,CASP8,CAST,CBFB,CBY1,CCDC85B,CCL5,CCND1,CD200,CD276,CD47,CDK6,CEBPD,CHRD,CHUK,COL11A2,CREB1,CREB3L2,CSF1 (includes EG:12977),CSF1R,CSF2,CTBP1,CTBP2,CTNNB1,CTNNBIP1,CYR61,DDIT3,DICER1,DKKL1,DLK2,DLX5,EBF1,EDN1,EFNA2…	273
Cell Cycle	S phase	entry into S phase	1.25E-06		-1.659	ABL1,APC,APP,ARAF,ATM,BCR,BHLHE40,BMP7,BRAF,C13orf15,CBX2,CCND1,CCND3,CD40,CDC25A,CDC6 (includes EG:23834),CDH1,CDK2,CDKN1A,CDKN1B,CDKN1C,CHEK2,CHRNA7,CREBBP,DDX3X,DMTF1,E2F1,E2F2,E2F3,E2F4,E2F6,E2F8,ESR2,F2,FGF2,FOS,FOXM1,GAS1 (includes EG:14451),GTF2I,HBEGF,HINFP,HMGA1,HMOX1,ID2,ID3 (includes EG:15903),IL1B,IL4 (includes EG:16189),IL4R,IL6,IL7,IRS1,ITGB1,JUNB,KLF4,KRAS,LMNA,MAP3K8,MAX,MCM10 (in…	91
Cell Signaling	small GTPase mediated signal transduction	small GTPase mediated signal transduction	1.29E-06		0.156	ADRA1B,ADRA2A,ADRB1,ALS2,ARFIP2,ARHGAP1,ARHGAP29,ARHGAP31,ARHGAP32,ARHGDIB,ARHGDIG,ARHGEF1,ARHGEF11,ARHGEF18,ARHGEF2,ARHGEF3,ARL6,ARRB1,BAIAP2,BCL6,BNIP2,BRAP,CDC42EP1,CDC42EP4,CDC42EP5,CDC42SE1,CDH13,CDH2,CDON,CFL1,CHP,CHUK,CNKSR1,COL1A2,CRK,CUL3 (includes EG:26554),DAB2IP,DBNL,DHCR24,DNAJA3,DOCK1,DOK2,EDNRA,EPS8L1,EPS8L2,FGF2,FOXM1,G3BP1,G3BP2,GDI2,GNA12,GNA13,GNB1,GRAP,GRB2,HMOX1,HRASLS,IQGAP3…	121
Cancer	skin tumor	skin tumor	1.30E-06		0.339	ABL1,AHR,ALOX12,ANGPTL4,ATF2,BAK1,BCR,BIRC5,BRAF,CAV1,CCBP2,CCND1,CD1A,CD207,CD80 (includes EG:12519),CD86,CDH1,CDK1,CDK19,CDK2,CDK3,CDK4,CDK5,CDK6,CDK7,CDKN1A,CDKN1B,CHEK1,CSE1L,CSF1R,CSF2RB,CTNNB1,CTSL1,CXCR3,CYLD,DDB2,EDN1,EPHA2,FGF2,FGF7,FGFR2,FH,FKBP1A,FLT1,FLT3,FNTA,FNTB,FOS,FYN,GABRA5,GJA1,GLI1,GSK3B,GSTM1,HDAC1,HDAC10,HDAC11,HDAC2,HDAC3,HDAC4,HDAC5,HDAC6,HDAC7,HDAC9,HIPK1,HPSE,HSP90AB1,HS…	151
Dermatological Diseases and Conditions	skin tumor	skin tumor	1.30E-06		0.339	ABL1,AHR,ALOX12,ANGPTL4,ATF2,BAK1,BCR,BIRC5,BRAF,CAV1,CCBP2,CCND1,CD1A,CD207,CD80 (includes EG:12519),CD86,CDH1,CDK1,CDK19,CDK2,CDK3,CDK4,CDK5,CDK6,CDK7,CDKN1A,CDKN1B,CHEK1,CSE1L,CSF1R,CSF2RB,CTNNB1,CTSL1,CXCR3,CYLD,DDB2,EDN1,EPHA2,FGF2,FGF7,FGFR2,FH,FKBP1A,FLT1,FLT3,FNTA,FNTB,FOS,FYN,GABRA5,GJA1,GLI1,GSK3B,GSTM1,HDAC1,HDAC10,HDAC11,HDAC2,HDAC3,HDAC4,HDAC5,HDAC6,HDAC7,HDAC9,HIPK1,HPSE,HSP90AB1,HS…	151
Cell Morphology	shape change	shape change of tumor cell lines	1.32E-06		0.966	ACVR1C,ADRBK1,ANXA5,ARHGEF11,BCL10,CALCB,CASP3,CBL,CCNE1,CHN1,CHRM1,CSF1 (includes EG:12977),DNMBP,DPYSL2,EDNRA,EDNRB,EFNA1,EGFR,F2,FLNA,FLNB,GBP2 (includes EG:14469),GEM,GIT1 (includes EG:216963),GNA11,GNA12,GNA13,GNAQ,GPR132,HES1 (includes EG:15205),HTR4,IL6,IL8,INHBB,ITGA5,ITGB1,LGALS8,MAPK8,MARCKS,MATK,MGAT5,MLL2,MMP9,MPRIP,NGF,PAK1,PAK3,PARVB,PFN1,PIP5K1A,PITX2,PLAU,PLD1,PODXL,PPFIA1,PRKD1,P…	89
Carbohydrate Metabolism	uptake	uptake of monosaccharide	1.41E-06		-0.339	ACSL1,ADRA1D,ADRB1,AGT,AKT2,ALB,APOA1,APP,APPL1,ASPSCR1,BDKRB2,C1QL3,C5,CAV3,CD36,CPT1A,CPT1C,CRAT,CSF1 (includes EG:12977),CSF1R,CSF2,CTF1,CXCL14,DGKA,EDN1,EGR1,ELK1,ERBB3,ESRRA,FABP3,FGF21,FOXO4,G6PC,GAPVD1,GCK,GFPT1,GGPS1,GHR,GPAM,GSK3A,H6PD,HBEGF,HFE,HGF,HNF1A,HTT,IL1B,IL4 (includes EG:16189),IL6,IL7,IL8,INPP5K,INPPL1,INSR,INSRR,IRS1,KCNC1,KLF15,KLF4,LNPEP,LPL,MAPK9,MIF,MTM1,MTOR,MYC,MYO1C,MY…	119
Molecular Transport	quantity	quantity of reactive oxygen species	1.45E-06		-0.187	ABL1,ABL2,ACOX1,AGT,AHSP,Alox12e,ALOX15B,APOE,APP,ATM,BCL2L1,BCR,CA3,CAT,CP,CSF1 (includes EG:12977),CSF1R,CYBB,DNAJB1,DYRK1B,EDN1,EPOR,FANCC,FAS,FOXO3,FTH1 (includes EG:14319),FXN,G6PD,GCH1,GGT1,HGF,HMGA1,HMOX1,HSPA4,HTT,IL18 (includes EG:16173),IL1A,IL1B,IL4 (includes EG:16189),IL8,ITCH,LDLR,MAP3K5,MAP3K7 (includes EG:172842),MTOR,MUC1,MYC,NCF2,NDUFAB1,NFE2,NFE2L1,NFE2L2,NGF,NOS3,NOX1,NRF1,OLR1…	85
Free Radical Scavenging	quantity	quantity of reactive oxygen species	1.45E-06		-0.187	ABL1,ABL2,ACOX1,AGT,AHSP,Alox12e,ALOX15B,APOE,APP,ATM,BCL2L1,BCR,CA3,CAT,CP,CSF1 (includes EG:12977),CSF1R,CYBB,DNAJB1,DYRK1B,EDN1,EPOR,FANCC,FAS,FOXO3,FTH1 (includes EG:14319),FXN,G6PD,GCH1,GGT1,HGF,HMGA1,HMOX1,HSPA4,HTT,IL18 (includes EG:16173),IL1A,IL1B,IL4 (includes EG:16189),IL8,ITCH,LDLR,MAP3K5,MAP3K7 (includes EG:172842),MTOR,MUC1,MYC,NCF2,NDUFAB1,NFE2,NFE2L1,NFE2L2,NGF,NOS3,NOX1,NRF1,OLR1…	85
Cellular Growth and Proliferation	growth	arrest in growth of cells	1.46E-06			ABL1,AKAP12,AKT3 (includes EG:10000),BCL10,BCL2L1,BCL6,BMP2,BMP4,BMP7,BRAF,BRCA1,BTG2,CASP3,CAV1,CBX7,CCND1,CCND2,CCND3,CCNE1,CD40,CDC7 (includes EG:12545),CDH13,CDK2,CDK4,CDK6,CDKN1A,CDKN1B,CDKN1C,CDKN2B,CDKN2D,CTNNB1,DAB2,DMTF1,E2F1,EGFR,EGR1,ELAC2,ENG,EPO,ETS1,ETS2,EWSR1,EZH2,FGF1,FGFR2,FLI1,FOS,FOXO3,GAB2,GADD45GIP1,GDF15,GTF2I,HES1 (includes EG:15205),HIF1A,HIPK2,HMOX1,ID3 (includes EG:15903…	124
Psychological Disorders	mood disorder	mood disorder	1.69E-06		0.153	A2M,ABCA1,ABCA6,ABCB1,ABCB11,ABCC4 (includes EG:10257),ABTB2,ACAD11,ACBD3,ACBD5,ACER3,ACHE,ACPP,ACTL6B,ACTL7A,ADAMTS14,ADAMTS3,ADCY9,ADRA1B,ADRA1D,ADRA2A,ADRA2B,ADRB1,ADRB2,ADRBK2,AEBP2,AFAP1L1,AGPAT4,AGT,AHCY,AK2,AKAP10,AKAP3,AKR1E2,ALB,ALDH5A1,ALG9,ALK,ALKBH8,ALOX12,AMBP,AMDHD1,AMZ1,ANK2,ANKMY1,ANKRD35,ANKRD6,ANO4,ANXA3,ANXA6,AP3B1,APOD,APOE,APOM,APP,AQP4,AR,ARHGAP10,ARHGAP18,ARHGAP26,ARHGAP42,…	827
Cell Cycle	G2/M phase transition	G2/M phase transition	1.77E-06		0.070	ABCB1,ANAPC10,ANAPC4,ANAPC5,AR,ATF2,ATF5,ATM,ATR,BIRC5,BLM,BRSK2,CCNA2,CCND1,CDC25B,CDC25C,CDC5L,CDK1,CDK2,CDKN1A,CDKN2B,CHEK1,CIT,DPP4,EIF2AK2,ELAC2,FANCC,GADD45A,GADD45B,GADD45G,GORASP2,HDAC1,HMGA1,IGF2,IL24,IRS1,JUNB,LATS1,LATS2,LGALS1,LIF,LZTS1,MAP2K6,MAP3K8,MAPK14,MBD4,MELK,MXD1,NES,PARP1,PCBP4,PLAU,PLCB1,POLB,PTEN,PTTG1,RB1,RRM2B,SKP2 (includes EG:27401),TAF2 (includes EG:170844),TERT,TP53 …	65
Cellular Growth and Proliferation	proliferation	proliferation of fibroblasts	1.80E-06		0.367	ABL1,AGT,AHR,AIF1 (includes EG:11629),AIMP1,AQP1,ARID3A,ATF4,BMI1,BMP2,BMP4,BTC,CAV1,CCNA2,CCND1,CCND2,CCND3,CCNE1,CCNF,CD40,CDK2,CDK4,CDK6,CDKN1A,CDKN1B,CDKN2B,CITED2,CTNNB1,DACH1,DDR2 (includes EG:18214),EDNRA,EGFR,EMD,ERF,F2,FGF1,FGF2,FLT1,FNTB,FOS,FOSB,FOSL2,GAS6,GJA1,GNPNAT1,GPI,GRB2,HGS,HMMR,HS6ST1,HTR2A,IFI30,IFNAR1,IGF2,IGFBP4,IKBKB,IL4 (includes EG:16189),IL6,ILK,ITGA1,ITGA5,ITGB1,JUN,KS…	130
Connective Tissue Development and Function	proliferation	proliferation of fibroblasts	1.80E-06		0.367	ABL1,AGT,AHR,AIF1 (includes EG:11629),AIMP1,AQP1,ARID3A,ATF4,BMI1,BMP2,BMP4,BTC,CAV1,CCNA2,CCND1,CCND2,CCND3,CCNE1,CCNF,CD40,CDK2,CDK4,CDK6,CDKN1A,CDKN1B,CDKN2B,CITED2,CTNNB1,DACH1,DDR2 (includes EG:18214),EDNRA,EGFR,EMD,ERF,F2,FGF1,FGF2,FLT1,FNTB,FOS,FOSB,FOSL2,GAS6,GJA1,GNPNAT1,GPI,GRB2,HGS,HMMR,HS6ST1,HTR2A,IFI30,IFNAR1,IGF2,IGFBP4,IKBKB,IL4 (includes EG:16189),IL6,ILK,ITGA1,ITGA5,ITGB1,JUN,KS…	130
Organismal Injury and Abnormalities	atrophy	atrophy	1.96E-06		-0.737	ACHE,ACVR2B,AHR,AIFM1,AKT2,APOE,AR,ATF2,ATXN1,BCL10,BDKRB2,BDNF,CBLB,CD274,CDK5R1,CDKN1B,CDKN2D,CHRNE,CTSB,CTSL2,CYBB,Cyct,DCN,DGAT1,DICER1,DNAJA3,E2F1,E2F3,EDNRA,EDNRB,EGR1,EGR3,EPO,ERCC2,ESR2,FBXO32,FERMT1,FST,GAST,GDNF,GRID2,GSTZ1,HDAC4,HDAC5,HNF1A,HRH1,HSD17B2,HSF1 (includes EG:15499),HTR2A,HTT,IKBKB,IL6,IL7R,INHA,IRS1,Irs3,KITLG,KL,LHCGR,LIF,LMNA,MC2R,MET,MST1 (includes EG:15235),MTOR,MYD88,…	111
Small Molecule Biochemistry	metabolism	metabolism of amino acids	1.98E-06		1.936	AASS,ADC,ADSS,AFMID,AGXT,ALDH18A1,ALDH5A1,ALDH6A1,ARG1,ARG2 (includes EG:11847),ASL,ASNS,ASS1,ATF4,BCAT1,BCAT2,BCKDHA,BCKDHB,BPHL,CACNA1A,CBS,CCDC92,CKM,CKMT2,CTH,DAO,DDAH1,DDAH2,DDC,DDO,EGR1,FAH,GAMT,GART,GATM,GCH1,GCLC,GCLM,GCSH,GFPT2,GGH,GGT1,GGT5,GLDC,GLS,GLS2,GLUD1,GNMT,GOT1,GOT2,GSS,GSTZ1,HAL,HDC,HPD,IL4 (includes EG:16189),IL6,IVD,KYNU,MECP2,MSRA,MTHFD1,MTHFR,MTR,MTRR,NAGS,NFS1,NOS1,NOS2,N…	104
Amino Acid Metabolism	metabolism	metabolism of amino acids	1.98E-06		1.936	AASS,ADC,ADSS,AFMID,AGXT,ALDH18A1,ALDH5A1,ALDH6A1,ARG1,ARG2 (includes EG:11847),ASL,ASNS,ASS1,ATF4,BCAT1,BCAT2,BCKDHA,BCKDHB,BPHL,CACNA1A,CBS,CCDC92,CKM,CKMT2,CTH,DAO,DDAH1,DDAH2,DDC,DDO,EGR1,FAH,GAMT,GART,GATM,GCH1,GCLC,GCLM,GCSH,GFPT2,GGH,GGT1,GGT5,GLDC,GLS,GLS2,GLUD1,GNMT,GOT1,GOT2,GSS,GSTZ1,HAL,HDC,HPD,IL4 (includes EG:16189),IL6,IVD,KYNU,MECP2,MSRA,MTHFD1,MTHFR,MTR,MTRR,NAGS,NFS1,NOS1,NOS2,N…	104
Cell Death	cell death	cell death of kidney cells	2.06E-06		0.811	ABCC1,ABCG2,ADRBK1,AGT,AIFM3,APP,ATG5 (includes EG:11793),ATP13A2,ATP1A1,ATP1A4,ATP2B2,BAD,BAG4,BCL10,BCL2A1,BCL2L1,BCL6,BECN1,BIRC3,BIRC5,BNIP3,BOK,CALB1,CASP2,CASP3,CASP7,CASP8,CASP9 (includes EG:100140945),CAT,CCNI,CD2AP,CDKN1A,CDKN1B,CFLAR,CHMP5,CNNM4,COX11,CTGF,CTNNB1,CYCS,DAP3,DAXX,DCN,DCTN2,DDIT3,DDN,DDX17,DLST,DPM3,E2F6,EDN1,EGFR,EIF2AK2,EMP2,EMP3,EPHB2,EPO,ERN1,F2,FADD,FAS,FDFT1,FGF1,FGF…	192
Molecular Transport	accumulation	accumulation of lipid	2.21E-06		-0.614	ABCA1,ABCB11,ABCC1,ABCD1,ABHD5,ACADL,ACADVL,ACAT1,ACAT2,ACOX1,ACSL1,ACSL6,AGPAT2,AGPAT9,AHR,Alox12e,APOA1,APOBR,APOE,ARSA,ASAH1,ATP8B1,B4GALNT1,BCL2L1,BCMO1,BMP2,C5,CALCB,CAV1,CCL22,CD36,CEBPD,CEL,CERS5,CERS6,Ces1e,CHRM1,CIDEC,COL4A3BP,CPT1A,CREB1,CSF2RB,CYP7A1,DBI,DGAT1,ECI1,EDN1,EDN2,ELOVL3,ELOVL5,EPAS1,ESRRA,F2,FABP4,FAS,FOXO4,GBA,GBA2,GGT5,GLB1,GPAM,GSK3A,GSK3B,HADHA,HEXA,HEXB,HMOX1,ICAM1,IDH…	149
Lipid Metabolism	accumulation	accumulation of lipid	2.21E-06		-0.614	ABCA1,ABCB11,ABCC1,ABCD1,ABHD5,ACADL,ACADVL,ACAT1,ACAT2,ACOX1,ACSL1,ACSL6,AGPAT2,AGPAT9,AHR,Alox12e,APOA1,APOBR,APOE,ARSA,ASAH1,ATP8B1,B4GALNT1,BCL2L1,BCMO1,BMP2,C5,CALCB,CAV1,CCL22,CD36,CEBPD,CEL,CERS5,CERS6,Ces1e,CHRM1,CIDEC,COL4A3BP,CPT1A,CREB1,CSF2RB,CYP7A1,DBI,DGAT1,ECI1,EDN1,EDN2,ELOVL3,ELOVL5,EPAS1,ESRRA,F2,FABP4,FAS,FOXO4,GBA,GBA2,GGT5,GLB1,GPAM,GSK3A,GSK3B,HADHA,HEXA,HEXB,HMOX1,ICAM1,IDH…	149
Small Molecule Biochemistry	accumulation	accumulation of lipid	2.21E-06		-0.614	ABCA1,ABCB11,ABCC1,ABCD1,ABHD5,ACADL,ACADVL,ACAT1,ACAT2,ACOX1,ACSL1,ACSL6,AGPAT2,AGPAT9,AHR,Alox12e,APOA1,APOBR,APOE,ARSA,ASAH1,ATP8B1,B4GALNT1,BCL2L1,BCMO1,BMP2,C5,CALCB,CAV1,CCL22,CD36,CEBPD,CEL,CERS5,CERS6,Ces1e,CHRM1,CIDEC,COL4A3BP,CPT1A,CREB1,CSF2RB,CYP7A1,DBI,DGAT1,ECI1,EDN1,EDN2,ELOVL3,ELOVL5,EPAS1,ESRRA,F2,FABP4,FAS,FOXO4,GBA,GBA2,GGT5,GLB1,GPAM,GSK3A,GSK3B,HADHA,HEXA,HEXB,HMOX1,ICAM1,IDH…	149
Cell Cycle	G1 phase	arrest in G1 phase of tumor cell lines	2.29E-06			ACIN1,AMH,BHLHE40,BMP2,BMP7,BRAF,BRCA1,BTG2,BTRC,CAMK1,CAMKK1,CAMKK2,CASP3,CCND1,CCND3,CCNE1,CD40,CDC25A,CDC25B,CDK2,CDK4,CDK5RAP3,CDKN1A,CDKN1B,CDKN1C,CDKN2B,CREM,CSF2,CYR61,DAXX,DCN,DDIT3,DUSP1,EGFR,EPB41L1,EPO,ESR2,ESRRG,EZH2,FASN,FGF2,FOXM1,FOXO1 (includes EG:2308),GDF15,GFI1,GNL3,GPS2,GSK3B,GSPT1,HES1 (includes EG:15205),ID3 (includes EG:15903),IL1A,IL6,ITGA5,ITGAV,ITGB1,JAK2,KLF4,LAS1L,LGAL…	100
Cancer	tumorigenesis	tumorigenesis of malignant tumor	2.37E-06		-0.418	AHR,AHSG,AKT2,ALK,ANGPTL1,APC,ARRB2,ATM,BIRC5,BMI1,BRCA1,BRD2,BTG2,BTRC,CCND3,CDCA7L,CDK2,CDK4,CDKN1A,CDKN1B,CDKN2C,CLEC11A,CSF2,CTTN,CYP1B1,DCN,DDB2,DMTF1,E2F1,E2F2,EGFR,EGR1,EPB41L3,ERBB3,ERCC6,ETV6,FBXW7,FGF2,FHIT,FOS,GLI1,GNAI2,GSTM1,HGF,HIP1 (includes EG:176224),IFNAR1,IGFBP3,IL12A,IL1A,IL24,IL6,INHA,KIF11,KRAS,LTA,LTBR,MAP3K8,MAPK8,MAPK9,MCL1,MDM4,MET,MLH1,MMP14,MSH2,MT1E,MT2A,MUC1,MUTYH,MX…	124
Cell Cycle	G1/S phase transition	G1/S phase	2.39E-06		-1.296	ACVR1,ACVR1B,ADRA1D,AHR,ATF3,BAD,BCAT1,BIRC5,BLM,CAMK2A,CAMK2D,CAMK2G,CAPNS1,CCND1,CCND2,CCND3,CCNE1,CCNE2,CDC25A,CDC25C,CDC6 (includes EG:23834),CDCA5,CDK3,CDK4,CDK6,CDKN1A,CDKN1B,CDKN2B,CDKN2C,CDKN2D,CDKN3,CHEK2,COPS2,CREG1,CUL2,CUL3 (includes EG:26554),CUL4A,CUL5,CYLD,DARS,DTD1,E2F1,E2F3,EIF2AK2,EIF4E,EIF4EBP1,ELAVL1,ELF4,ERBB3,ESRRA,ESRRG,ETS1,FOXM1,GADD45A,GADD45B,GADD45G,GHR,GJA1,GPI,GPR132…	129
Cancer	thyroid cancer	thyroid cancer	2.39E-06		0.348	ABCC3,ABL1,ADAMTS1,AKR1B1,ALOX15,ALOX15B,ALOX5,AMOT,ANGPT2,APC,ATM,BAD,BCR,BRAF,CBX7,CCND1,CCND2,CD48,CDH1,CDK4,CDKN1B,COPS2,CSF1R,CST7,CTNNB1,CXCL16,CXCR4,DIRAS3,E2F3,ECM1 (includes EG:100332249),EFNB2,EGFR,ENG,EPHB4,ETS1,FCGBP,FGF2,FGFR1,FGFR2,FGFR4,FKBP1A,FLT1,FLT3,GABBR2,GALNT3,GDF15,GOLGA5,HGF,HUWE1,ITGA5,KDR,KIT,KLK10,KRAS,LGALS3,LIFR,LSM7,MAP3K8,MCM7,MET,MLH1,MMP2,MMP9,MT-ND1,MT-ND2,MT-ND3…	129
Molecular Transport	quantity	quantity of ATP	2.43E-06		-1.794	ADK,AKT2,APP,ATP5B,BCL2L1,CD36,CD47,Cyct,EEF2K,ENTPD1,FAS,FXN,GAPDHS,GPD2,HIF1A,HSD17B10,HTT,IGFBP3,IL18 (includes EG:16173),LETM1,LPL,LRP5,MARK2,MMP14,MPI,NGF,NMNAT1,NOS3,NQO1,PARP1,PKM2,PPARG,PRKAA2,RXRA,SLC25A12,SLC25A13,SLC25A47,SLC2A4,SOX6,SREBF2,STOML2,TERT,TNF,UCP2,UCP3,VDAC1,XDH	47
Small Molecule Biochemistry	quantity	quantity of ATP	2.43E-06		-1.794	ADK,AKT2,APP,ATP5B,BCL2L1,CD36,CD47,Cyct,EEF2K,ENTPD1,FAS,FXN,GAPDHS,GPD2,HIF1A,HSD17B10,HTT,IGFBP3,IL18 (includes EG:16173),LETM1,LPL,LRP5,MARK2,MMP14,MPI,NGF,NMNAT1,NOS3,NQO1,PARP1,PKM2,PPARG,PRKAA2,RXRA,SLC25A12,SLC25A13,SLC25A47,SLC2A4,SOX6,SREBF2,STOML2,TERT,TNF,UCP2,UCP3,VDAC1,XDH	47
Nucleic Acid Metabolism	quantity	quantity of ATP	2.43E-06		-1.794	ADK,AKT2,APP,ATP5B,BCL2L1,CD36,CD47,Cyct,EEF2K,ENTPD1,FAS,FXN,GAPDHS,GPD2,HIF1A,HSD17B10,HTT,IGFBP3,IL18 (includes EG:16173),LETM1,LPL,LRP5,MARK2,MMP14,MPI,NGF,NMNAT1,NOS3,NQO1,PARP1,PKM2,PPARG,PRKAA2,RXRA,SLC25A12,SLC25A13,SLC25A47,SLC2A4,SOX6,SREBF2,STOML2,TERT,TNF,UCP2,UCP3,VDAC1,XDH	47
Energy Production	quantity	quantity of ATP	2.43E-06		-1.794	ADK,AKT2,APP,ATP5B,BCL2L1,CD36,CD47,Cyct,EEF2K,ENTPD1,FAS,FXN,GAPDHS,GPD2,HIF1A,HSD17B10,HTT,IGFBP3,IL18 (includes EG:16173),LETM1,LPL,LRP5,MARK2,MMP14,MPI,NGF,NMNAT1,NOS3,NQO1,PARP1,PKM2,PPARG,PRKAA2,RXRA,SLC25A12,SLC25A13,SLC25A47,SLC2A4,SOX6,SREBF2,STOML2,TERT,TNF,UCP2,UCP3,VDAC1,XDH	47
Cellular Movement	migration	migration of endothelial cells	2.44E-06		-0.401	ADAM15,ADM,AGT,ALOX12,AMOT,AMOTL1,ANGPT1,ANGPT2,ANGPT4,ANGPTL1,ANGPTL3,ANGPTL4,ANXA3,APOE,ARHGAP24,ARRB2,AXL,BMP4,BMP6,BMPR2,BMX,CAV1,CD151,CD9,CDH13,CDH5,COL18A1,COL4A1,COL4A2,CSF2,CYP1B1,CYR61,DCN,DLL4,DPP4,EDN1,EFNB2,ENG,ERAP1,ESAM,FGF1,FGF2,FLT1,FOXC2,G6PD,GAB1,GATA3,GIPC1,HAS3,HEY1,HGF,ICAM1,IGFBP3,IL1B,IL8,ITGA3,ITGA9,ITGAV,ITGB1,ITGB2,ITGB3,KDR,MAP2K3,MAPK12,MAPK14,MAPKAPK2,MGP,MMP13,MMP14…	112
Cardiovascular System Development and Function	migration	migration of endothelial cells	2.44E-06		-0.401	ADAM15,ADM,AGT,ALOX12,AMOT,AMOTL1,ANGPT1,ANGPT2,ANGPT4,ANGPTL1,ANGPTL3,ANGPTL4,ANXA3,APOE,ARHGAP24,ARRB2,AXL,BMP4,BMP6,BMPR2,BMX,CAV1,CD151,CD9,CDH13,CDH5,COL18A1,COL4A1,COL4A2,CSF2,CYP1B1,CYR61,DCN,DLL4,DPP4,EDN1,EFNB2,ENG,ERAP1,ESAM,FGF1,FGF2,FLT1,FOXC2,G6PD,GAB1,GATA3,GIPC1,HAS3,HEY1,HGF,ICAM1,IGFBP3,IL1B,IL8,ITGA3,ITGA9,ITGAV,ITGB1,ITGB2,ITGB3,KDR,MAP2K3,MAPK12,MAPK14,MAPKAPK2,MGP,MMP13,MMP14…	112
Cellular Growth and Proliferation	colony formation	colony formation of tumor cell lines	2.48E-06		-0.067	ADAM17,AIFM1,ALDH1A1,ALK,ANKRD1,ANXA7,ATF3,BACH2,BCL2L1,BECN1,BMI1,CADM1,CASP9 (includes EG:100140945),CAV1,CCNG2,CDCA7L,CDKN1A,CDKN1B,CLCA1,CLCA2,CLDN4,CLU,CNOT7,CTCF (includes EG:10664),CTNNB1,CTSD,CYP2J2,CYR61,DIABLO,DICER1,DIRAS3,DROSHA,DYNC1H1,DYRK1B,E2F1,E2F8,EDN1,EGFR,EGR1,EHF,ELF3,ENO1,EPAS1,ESR2,FBLN1,FGF2,FGF8,FOXO3,FXN,GADD45A,GADD45B,GADD45G,GHRHR,GRB2,GRB7,GRN,HCK,HES1 (includes EG:1…	155
Cell Morphology	cell spreading	cell spreading	2.52E-06		1.204	ALB,ANTXR1,ARAP1,ARPC3,ASAP1,ATRN,BCAR1,BCL10,BTK,CAST,CBL,CCL5,CD40,CIB1,CNN2,COL5A3,CORO1A,CRK,CSK,DAB2,EDNRB,EFNA1,EFNB1,EGFR,EPHA2,EXOC5,FBN1,FERMT1,FGF2,FGR,FHL3,FLNA,FLNB,GBP2 (includes EG:14469),GEM,GIT1 (includes EG:216963),GNA11,GNB2L1,GPR132,GRID2,HCK,HGF,IGBP1,IL2RA,IL8,ILK,INPP5D,IRAK1,ITGA1,ITGA11,ITGA2,ITGA3,ITGA5,ITGA9,ITGAV,ITGB1,ITGB1BP1,ITGB2,ITGB3,L1CAM,LGALS8,LPAR1,LPP,LPXN,LY…	142
Cancer	development	development of malignant tumor	2.58E-06		-0.401	AGT,ATM,BCL6,BCR,BUB1B,CCND1,CDKN2C,CSF1 (includes EG:12977),CST3,CTNNB1,CTSS,CUX1,E2F3,EGFR,EGR1,FGF8,FHIT,FOXM1,GDNF,HGF,HMGA1,ID1,IER3,IFNGR1,IL6,INHA,JUN,LIG4,LTA,MAPK8,MET,MMP2,MYC,NCOA3,NFKB2,NFKBIA,NOS2,PDGFC,PML,PPARA,PRKCE,PTCH1,PTEN,PTPRC,RAD52 (includes EG:19365),RARA,RASGRP1,Rassf1,RB1,RBL1,RBL2 (includes EG:100331892),SERPINC1,SKP2 (includes EG:27401),SMAD3,SMARCB1,TCF3,TGFA,TNF,TNFS…	62
Cellular Function and Maintenance	autophagy	autophagy	2.62E-06		1.583	AGER,AGT,APP,ARSA,ARSB,ATF4,ATG10 (includes EG:641330),ATG12 (includes EG:361321),ATG13 (includes EG:362164),ATG14 (includes EG:100504663),ATG16L1,ATG4A,ATG4B,ATG4C,ATG4D,ATG5 (includes EG:11793),ATG9A,ATM,BAIAP2,BECN1,BNIP3,BRCA1,CAMP,CAPN1,CAPNS1,CASP2,CAST,CAT,CATSPER4,CDKN1A,CDKN2D,CFLAR,CHEK1,CHRND,CHUK,CISD2,CLTC,COX5A (includes EG:12858),CTSD,CTSL1,DAPK1,DAPK3,DDIT4,EEF2K,EIF2AK2,EIF2AK3,E…	127
Cell Morphology	autophagy	autophagy	2.62E-06		1.583	AGER,AGT,APP,ARSA,ARSB,ATF4,ATG10 (includes EG:641330),ATG12 (includes EG:361321),ATG13 (includes EG:362164),ATG14 (includes EG:100504663),ATG16L1,ATG4A,ATG4B,ATG4C,ATG4D,ATG5 (includes EG:11793),ATG9A,ATM,BAIAP2,BECN1,BNIP3,BRCA1,CAMP,CAPN1,CAPNS1,CASP2,CAST,CAT,CATSPER4,CDKN1A,CDKN2D,CFLAR,CHEK1,CHRND,CHUK,CISD2,CLTC,COX5A (includes EG:12858),CTSD,CTSL1,DAPK1,DAPK3,DDIT4,EEF2K,EIF2AK2,EIF2AK3,E…	127
Cardiovascular System Development and Function	dilation	dilation of heart chamber	2.74E-06		-0.312	ADCY5,ADRB2,BGN,BNIP3,CAMK2D,CAV1,CAV3,CCNA2,DDC,EPO,F2R,FSTL3,GAB1,GAB2,GNAQ,HBEGF,IL1RL1,KLF15,LMNA,MARCKSL1,MEF2A,MMP9,NCF1,NOS1,NOS2,NUPR1,PLAU,PLCE1,PPP3R1,PRDX3,PTGES,RHOA,ROCK1,SERPINE1,SERPINF2,SLC2A1,SPEG,SPP1 (includes EG:20750),SRF,TGFBR2,TIMP1,TNF	42
Organ Morphology	dilation	dilation of heart chamber	2.74E-06		-0.312	ADCY5,ADRB2,BGN,BNIP3,CAMK2D,CAV1,CAV3,CCNA2,DDC,EPO,F2R,FSTL3,GAB1,GAB2,GNAQ,HBEGF,IL1RL1,KLF15,LMNA,MARCKSL1,MEF2A,MMP9,NCF1,NOS1,NOS2,NUPR1,PLAU,PLCE1,PPP3R1,PRDX3,PTGES,RHOA,ROCK1,SERPINE1,SERPINF2,SLC2A1,SPEG,SPP1 (includes EG:20750),SRF,TGFBR2,TIMP1,TNF	42
Hematological System Development and Function	myelopoiesis	myelopoiesis	2.74E-06	Increased	2.455	ABL1,ACHE,ACVR1B,ACVR2A,ADAR,ADD1,AHSP,ALAS2,AXL,BCL2L1,BCL6,BCR,BMP4,BTK,C1QC,CBFA2T3,CBFB,CD163,CD8A,CDK6,CDKN1A,CDKN1B,CEBPE,CITED2,CLEC11A,CSF1 (includes EG:12977),CSF1R,CSF2,CTCF (includes EG:10664),CUL4A,DNASE2,DYRK3,E2F2,E2F4,EGFR,EGR1,EIF2AK2,EIF2C2,ENG,EPAS1,EPO,EPOR,ERCC2,ERG,ETS1,ETV2,ETV6,FAS,FLI1,FLNA,FLVCR1,FOXO3,G6PD,GATA1,GATA2,GATA3,GFI1,GFI1B,GNA15,HBZ,HCLS1,HIF1A,HIPK2,HMGA1,HM…	161
Hematopoiesis	myelopoiesis	myelopoiesis	2.74E-06	Increased	2.455	ABL1,ACHE,ACVR1B,ACVR2A,ADAR,ADD1,AHSP,ALAS2,AXL,BCL2L1,BCL6,BCR,BMP4,BTK,C1QC,CBFA2T3,CBFB,CD163,CD8A,CDK6,CDKN1A,CDKN1B,CEBPE,CITED2,CLEC11A,CSF1 (includes EG:12977),CSF1R,CSF2,CTCF (includes EG:10664),CUL4A,DNASE2,DYRK3,E2F2,E2F4,EGFR,EGR1,EIF2AK2,EIF2C2,ENG,EPAS1,EPO,EPOR,ERCC2,ERG,ETS1,ETV2,ETV6,FAS,FLI1,FLNA,FLVCR1,FOXO3,G6PD,GATA1,GATA2,GATA3,GFI1,GFI1B,GNA15,HBZ,HCLS1,HIF1A,HIPK2,HMGA1,HM…	161
Cellular Growth and Proliferation	growth	growth of muscle cells	2.75E-06		-0.684	AGT,AIF1 (includes EG:11629),AKR1B1,BMP4,CEBPD,CMA1,CTNNB1,DNAJB6,DUSP1,E2F1,EDN1,EGFR,ELK1,FGF2,FOS,FOXP1,GSK3B,HGF,HOPX,ID2,ID3 (includes EG:15903),IGF1R,IGFBP5,IL6,ITGB1,KLF4,LPAR1,LPAR2,NFATC2,NOX1,OSM,PAPPA,PDE3A,PDPK1,PLCE1,PPARA,PRKCA,PRKCZ,PRRX1,PTEN,RAB1A,RALBP1,SOCS1,SOCS3,SPP1 (includes EG:20750),THBS1,TNF,TNFRSF12A,TP53 (includes EG:22059)	49
Cellular Development	growth	growth of muscle cells	2.75E-06		-0.684	AGT,AIF1 (includes EG:11629),AKR1B1,BMP4,CEBPD,CMA1,CTNNB1,DNAJB6,DUSP1,E2F1,EDN1,EGFR,ELK1,FGF2,FOS,FOXP1,GSK3B,HGF,HOPX,ID2,ID3 (includes EG:15903),IGF1R,IGFBP5,IL6,ITGB1,KLF4,LPAR1,LPAR2,NFATC2,NOX1,OSM,PAPPA,PDE3A,PDPK1,PLCE1,PPARA,PRKCA,PRKCZ,PRRX1,PTEN,RAB1A,RALBP1,SOCS1,SOCS3,SPP1 (includes EG:20750),THBS1,TNF,TNFRSF12A,TP53 (includes EG:22059)	49
Skeletal and Muscular System Development and Function	growth	growth of muscle cells	2.75E-06		-0.684	AGT,AIF1 (includes EG:11629),AKR1B1,BMP4,CEBPD,CMA1,CTNNB1,DNAJB6,DUSP1,E2F1,EDN1,EGFR,ELK1,FGF2,FOS,FOXP1,GSK3B,HGF,HOPX,ID2,ID3 (includes EG:15903),IGF1R,IGFBP5,IL6,ITGB1,KLF4,LPAR1,LPAR2,NFATC2,NOX1,OSM,PAPPA,PDE3A,PDPK1,PLCE1,PPARA,PRKCA,PRKCZ,PRRX1,PTEN,RAB1A,RALBP1,SOCS1,SOCS3,SPP1 (includes EG:20750),THBS1,TNF,TNFRSF12A,TP53 (includes EG:22059)	49
Cancer	tumorigenesis	tumorigenesis of tumor cell lines	2.85E-06		0.111	ADAM17,ADAMTS9,AKIRIN2,AKT2,ANG,ANGPT2,ANGPTL1,ANGPTL4,APC,ARHGDIG,ARRDC3,ATF3,ATP2C2,BECN1,BMX,CAMK2N2,CAPN2,CARD9,CASP3,CAV1,CCDC88A,CCND1,CD151,CD274,CDC25A,CDH2,CDKN1A,CNN1 (includes EG:1264),COL18A1,COL4A1,COL4A2,CSE1L,CSRP3,CTSB,CTTN,CXADR,CXCR4,CYR61,DAPK1,DNAJB4,DPP4,E2F8,ECT2,EGFR,EGR1,EIF4E,EPAS1,EPCAM,ERF,ETS1,F2R,FADD,FBLN5,FGF2,FHIT,FOS,FYN,HGF,HMOX1,HTATIP2,IGFBP2,IKBKB,IL27RA,IL6,I…	120
Gastrointestinal Disease	inflammatory bowel disease	inflammatory bowel disease	3.08E-06		-0.113	ABCA10,ABCB1,ABCB11,ABCC4 (includes EG:10257),ABCD3,ABCG1,ABHD3,ACOT7,ACPP,ACSL1,ACSL6,ADAMTS12,ADAMTS16,ADAMTS2,ADAMTS3,ADCY3,ADORA2A,ADSL,AGPS,AK5,AKAP11,AKAP6,AKD1,ALB,ALCAM,ALOX12,ALOX5,ALPK2,AMT,ANK2,ANKFY1,ANO4,AOAH,APEH,APP,ARHGAP18,ARHGAP19,ARNT2,ASAP3,ASB7,ASPH,ASTN2,ATG16L1,ATP1B1,ATP2B2,ATP8B1,ATPAF1-AS1,ATRNL1,ATXN1,AXDND1,B4GALT4,BACH1,BANP,BCAS3,BCKDHB,BCR,BMP3,BNC1,BOLA3,BRE,C12orf…	814
Genetic Disorder	inflammatory bowel disease	inflammatory bowel disease	3.08E-06		-0.113	ABCA10,ABCB1,ABCB11,ABCC4 (includes EG:10257),ABCD3,ABCG1,ABHD3,ACOT7,ACPP,ACSL1,ACSL6,ADAMTS12,ADAMTS16,ADAMTS2,ADAMTS3,ADCY3,ADORA2A,ADSL,AGPS,AK5,AKAP11,AKAP6,AKD1,ALB,ALCAM,ALOX12,ALOX5,ALPK2,AMT,ANK2,ANKFY1,ANO4,AOAH,APEH,APP,ARHGAP18,ARHGAP19,ARNT2,ASAP3,ASB7,ASPH,ASTN2,ATG16L1,ATP1B1,ATP2B2,ATP8B1,ATPAF1-AS1,ATRNL1,ATXN1,AXDND1,B4GALT4,BACH1,BANP,BCAS3,BCKDHB,BCR,BMP3,BNC1,BOLA3,BRE,C12orf…	814
Inflammatory Disease	inflammatory bowel disease	inflammatory bowel disease	3.08E-06		-0.113	ABCA10,ABCB1,ABCB11,ABCC4 (includes EG:10257),ABCD3,ABCG1,ABHD3,ACOT7,ACPP,ACSL1,ACSL6,ADAMTS12,ADAMTS16,ADAMTS2,ADAMTS3,ADCY3,ADORA2A,ADSL,AGPS,AK5,AKAP11,AKAP6,AKD1,ALB,ALCAM,ALOX12,ALOX5,ALPK2,AMT,ANK2,ANKFY1,ANO4,AOAH,APEH,APP,ARHGAP18,ARHGAP19,ARNT2,ASAP3,ASB7,ASPH,ASTN2,ATG16L1,ATP1B1,ATP2B2,ATP8B1,ATPAF1-AS1,ATRNL1,ATXN1,AXDND1,B4GALT4,BACH1,BANP,BCAS3,BCKDHB,BCR,BMP3,BNC1,BOLA3,BRE,C12orf…	814
Cellular Movement	cell movement	cell movement of smooth muscle cells	3.45E-06		0.977	ADM,AGER,AGT,APOE,BMP2,BMPR2,CALCRL,CCL5,CCND1,CCR8,CD47,CDKN1B,CLIC4,COMP,CSF1 (includes EG:12977),CSF2,CTSL2,CYP2J2,ELN,F2,F2R,FBLN5,FGF2,FGFR1,FOXO4,GIT1 (includes EG:216963),HBEGF,HGF,IGFBP2,IGFBP4,IGFBP5,IL18 (includes EG:16173),IL1A,IL1B,IL6,IL6ST,ITGB1,ITGB5,LDLR,LOX,LPAR1,LPAR2,LTA,MAPKAPK2,MMP2,MMP9,MYC,NFE2L2,NGF,NOX1,NQO1,PDGFRB,PLA2G4A,PLAT,PLAU,PLAUR,POLDIP2,PROC,PTGER4,PTPN1,PTPN11,…	75
Skeletal and Muscular System Development and Function	cell movement	cell movement of smooth muscle cells	3.45E-06		0.977	ADM,AGER,AGT,APOE,BMP2,BMPR2,CALCRL,CCL5,CCND1,CCR8,CD47,CDKN1B,CLIC4,COMP,CSF1 (includes EG:12977),CSF2,CTSL2,CYP2J2,ELN,F2,F2R,FBLN5,FGF2,FGFR1,FOXO4,GIT1 (includes EG:216963),HBEGF,HGF,IGFBP2,IGFBP4,IGFBP5,IL18 (includes EG:16173),IL1A,IL1B,IL6,IL6ST,ITGB1,ITGB5,LDLR,LOX,LPAR1,LPAR2,LTA,MAPKAPK2,MMP2,MMP9,MYC,NFE2L2,NGF,NOX1,NQO1,PDGFRB,PLA2G4A,PLAT,PLAU,PLAUR,POLDIP2,PROC,PTGER4,PTPN1,PTPN11,…	75
Cancer	myeloproliferative disorder	myeloproliferative disorder	3.49E-06		-0.660	ABCB1,ABCC1,ABCG2,ABL1,ABL2,ADA,ADORA2A,ALOX5,AMY2A,ARHGAP26,ASXL1,ATP1A1,ATP1A2,ATP1A4,AURKA,AURKB,AXL,BAALC,BCL2L1,BCR,BMP1,BMP6,BMP7,BMPR2,BRAF,CBFB,CBL,CBLB,CD80 (includes EG:12519),CD86,CDKN2B,CHIC2,CPT1A,CPT1B,CSF1R,CSF2,CSF2RB,CTNNB1,CUX1,CUX2,CXCR4,CYP3A4,DCK,DHFR,DOK2,DPP4,E2F1,E2F3,EGFR,EGR1,EPHA2,EPHX1,EPO,ERCC2,ERG,ETV6,EZH2,FDFT1,FGFR1,FGFR2,FGFR3,FGR,FKBP1A,FLT1,FLT3,FNTA,FNTB,FOXO1…	182
Hematological Disease	myeloproliferative disorder	myeloproliferative disorder	3.49E-06		-0.660	ABCB1,ABCC1,ABCG2,ABL1,ABL2,ADA,ADORA2A,ALOX5,AMY2A,ARHGAP26,ASXL1,ATP1A1,ATP1A2,ATP1A4,AURKA,AURKB,AXL,BAALC,BCL2L1,BCR,BMP1,BMP6,BMP7,BMPR2,BRAF,CBFB,CBL,CBLB,CD80 (includes EG:12519),CD86,CDKN2B,CHIC2,CPT1A,CPT1B,CSF1R,CSF2,CSF2RB,CTNNB1,CUX1,CUX2,CXCR4,CYP3A4,DCK,DHFR,DOK2,DPP4,E2F1,E2F3,EGFR,EGR1,EPHA2,EPHX1,EPO,ERCC2,ERG,ETV6,EZH2,FDFT1,FGFR1,FGFR2,FGFR3,FGR,FKBP1A,FLT1,FLT3,FNTA,FNTB,FOXO1…	182
Cell Death	necrosis	necrosis of organ	3.67E-06		-0.175	ADM,AGER,AGT,AHR,APOE,APRT,ARNT,CACNB2,CASP2,CD14,CDKN1A,CLU,CTSB,FAS,FGL2,GSTZ1,HADHA,HGF,ICAM1,IKBKB,IL1B,IL27RA,IL2RA,INHA,IRF4,IRF8,ITGB2,LTA,LTBR,MAPK9,MED1 (includes EG:19014),MMP9,MNT,MPG,MT1E,MT2A,MYBPC3,NCF1,NFE2L1,NFE2L2,NOS2,NOS3,NPPA,NR1H4,OSM,PIK3R1,PLAT,PLAU,PLG,PPIF,PRF1,PRKCB,PROC,RXRA,SCG5,SERPINE1,SH3BP5,SIGIRR,SLC8A1,SLK,SOCS1,SOCS3,SOD1,SOD2,TIMP3,TLR4,TNF,TNFRSF1A,TNFRSF1B,TR…	71
Organ Morphology	necrosis	necrosis of organ	3.67E-06		-0.175	ADM,AGER,AGT,AHR,APOE,APRT,ARNT,CACNB2,CASP2,CD14,CDKN1A,CLU,CTSB,FAS,FGL2,GSTZ1,HADHA,HGF,ICAM1,IKBKB,IL1B,IL27RA,IL2RA,INHA,IRF4,IRF8,ITGB2,LTA,LTBR,MAPK9,MED1 (includes EG:19014),MMP9,MNT,MPG,MT1E,MT2A,MYBPC3,NCF1,NFE2L1,NFE2L2,NOS2,NOS3,NPPA,NR1H4,OSM,PIK3R1,PLAT,PLAU,PLG,PPIF,PRF1,PRKCB,PROC,RXRA,SCG5,SERPINE1,SH3BP5,SIGIRR,SLC8A1,SLK,SOCS1,SOCS3,SOD1,SOD2,TIMP3,TLR4,TNF,TNFRSF1A,TNFRSF1B,TR…	71
Cancer	head and neck cancer	head and neck cancer	3.73E-06		-0.857	ABCC3,ABCG1,ABCG2,ABL1,ADAM8,ADAMTS1,ADAMTS10,ADAMTS2,ADAMTS9,ADM,ADSL,AKAP1,AKR1B1,AKT2,AKT3 (includes EG:10000),ALAD,ALDH5A1,ALOX15,ALOX15B,ALOX5,AMOT,ANGPT2,APC,AR,ARRB1,ATIC,ATM,ATP5J,AURKA,AXIN1,AZGP1,B4GALT5,BAD,BCCIP,BCR,BGN,BIRC5,BMI1,BRAF,BRCA1,BTG2,C9orf150,CA9,CACNA1A,CACNA1B,CALCOCO2,CASP4,CAV1,CBX7,CBX8,CCND1,CCND2,CCR7,CD48,CDC7 (includes EG:12545),CDCA7L,CDH1,CDK1,CDK4,CDK6,CDKN1A,…	421
Cellular Development	differentiation	differentiation of epithelial cells	3.73E-06		0.326	ADAMTS20,ADAMTS9,AGER,APC,AQP3,AR,BCL3,BMP1,BMP2,BMP7,BRCA1,CASP3,CAV1,CBFA2T2,CCND1,CD63,CDH1,CDKN1A,CDKN1B,CHUK,CLIC4,COL18A1,COL4A1,CREBBP,CTNNB1,CTNND1,CTSL2,CYP19A1,CYP27B1,DLX3,DLX5,DLX6,DSG4,DSP,EDNRB,ELF5,ERRFI1,EVPL,F11R,FGF1,FGF2,FGF7,FGF8,FGFR2,FOXA1,FOXJ1,FOXN1,FZD1,FZD2,FZD9,GDF7,GLI1,GLI3,GNA11,GNAQ,HES1 (includes EG:15205),HOXA7,HPS1 (includes EG:114638),HPS6,HSF4,HUNK,ID1,ID2,ID3 …	155
Tissue Development	development	development of placenta	3.82E-06		0.596	ABCA1,ADA,ADM,ADRA2A,ADRA2B,ARNT,CCNF,CITED2,CSF2,DLX3,EGFR,ENG,EPAS1,ERF,ESRRB,ETNK2,ETV2,FBXW8,FOSL1,FOXD3,FZD5,GAB1,GATA2,GJB3,HIF1A,HIRA,HNF1A,HS6ST1,HSF1 (includes EG:15499),HSP90AB1,IL11RA,ITGB1,ITGB3,LIFR,MAPK14,MED1 (includes EG:19014),MET,NCOA6,NODAL,PEG10,PKD2 (includes EG:18764),PLG,PNPLA6,PPARD,PPARG,PRDM1,PTEN,RBPJ,SOCS3,SP1,SP3,SPINT1,STK3,STK4,TFAP2C,TFEB,TRAF3,TTPA,VCAM1,VHL,VWF	61
Organismal Development	development	development of placenta	3.82E-06		0.596	ABCA1,ADA,ADM,ADRA2A,ADRA2B,ARNT,CCNF,CITED2,CSF2,DLX3,EGFR,ENG,EPAS1,ERF,ESRRB,ETNK2,ETV2,FBXW8,FOSL1,FOXD3,FZD5,GAB1,GATA2,GJB3,HIF1A,HIRA,HNF1A,HS6ST1,HSF1 (includes EG:15499),HSP90AB1,IL11RA,ITGB1,ITGB3,LIFR,MAPK14,MED1 (includes EG:19014),MET,NCOA6,NODAL,PEG10,PKD2 (includes EG:18764),PLG,PNPLA6,PPARD,PPARG,PRDM1,PTEN,RBPJ,SOCS3,SP1,SP3,SPINT1,STK3,STK4,TFAP2C,TFEB,TRAF3,TTPA,VCAM1,VHL,VWF	61
Embryonic Development	development	development of placenta	3.82E-06		0.596	ABCA1,ADA,ADM,ADRA2A,ADRA2B,ARNT,CCNF,CITED2,CSF2,DLX3,EGFR,ENG,EPAS1,ERF,ESRRB,ETNK2,ETV2,FBXW8,FOSL1,FOXD3,FZD5,GAB1,GATA2,GJB3,HIF1A,HIRA,HNF1A,HS6ST1,HSF1 (includes EG:15499),HSP90AB1,IL11RA,ITGB1,ITGB3,LIFR,MAPK14,MED1 (includes EG:19014),MET,NCOA6,NODAL,PEG10,PKD2 (includes EG:18764),PLG,PNPLA6,PPARD,PPARG,PRDM1,PTEN,RBPJ,SOCS3,SP1,SP3,SPINT1,STK3,STK4,TFAP2C,TFEB,TRAF3,TTPA,VCAM1,VHL,VWF	61
Organ Development	development	development of placenta	3.82E-06		0.596	ABCA1,ADA,ADM,ADRA2A,ADRA2B,ARNT,CCNF,CITED2,CSF2,DLX3,EGFR,ENG,EPAS1,ERF,ESRRB,ETNK2,ETV2,FBXW8,FOSL1,FOXD3,FZD5,GAB1,GATA2,GJB3,HIF1A,HIRA,HNF1A,HS6ST1,HSF1 (includes EG:15499),HSP90AB1,IL11RA,ITGB1,ITGB3,LIFR,MAPK14,MED1 (includes EG:19014),MET,NCOA6,NODAL,PEG10,PKD2 (includes EG:18764),PLG,PNPLA6,PPARD,PPARG,PRDM1,PTEN,RBPJ,SOCS3,SP1,SP3,SPINT1,STK3,STK4,TFAP2C,TFEB,TRAF3,TTPA,VCAM1,VHL,VWF	61
Reproductive System Development and Function	development	development of placenta	3.82E-06		0.596	ABCA1,ADA,ADM,ADRA2A,ADRA2B,ARNT,CCNF,CITED2,CSF2,DLX3,EGFR,ENG,EPAS1,ERF,ESRRB,ETNK2,ETV2,FBXW8,FOSL1,FOXD3,FZD5,GAB1,GATA2,GJB3,HIF1A,HIRA,HNF1A,HS6ST1,HSF1 (includes EG:15499),HSP90AB1,IL11RA,ITGB1,ITGB3,LIFR,MAPK14,MED1 (includes EG:19014),MET,NCOA6,NODAL,PEG10,PKD2 (includes EG:18764),PLG,PNPLA6,PPARD,PPARG,PRDM1,PTEN,RBPJ,SOCS3,SP1,SP3,SPINT1,STK3,STK4,TFAP2C,TFEB,TRAF3,TTPA,VCAM1,VHL,VWF	61
Neurological Disease	retinopathy	retinopathy	3.88E-06		-0.260	ABL1,ADAM15,ADRA1B,ADRA1D,ADRA2A,ADRA2B,ADRB1,ADRB2,AKR1B1,ALDH5A1,APOE,ATXN7,BBS2,BBS4,BEST1,BMP4,C1QTNF5,C2,C3,CA1,CA12,CA13,CA14,CA2,CA3,CA4,CA5B,CA7,CA9,CABP4,CACNA1F,CACNA2D4,CDH23,CEP290,CFB,CHM,CHRNA1,CHRNA10,CHRNA5,CHRNA7,CHRNA9,CHRNB1,CHRNB2,CHRND,CHRNE,CHRNG,CLCN3,CLCN7,CNGA1,CNGB1,CP,CRB1,CRP,CSF1R,CST3,DICER1,EDN1,EDNRB,EFEMP2,ELOVL4,EPAS1,ESR2,FBLN1,FBLN2,FBLN5,FGFR1,FGFR3,FKBP1A,FLT…	142
Ophthalmic Disease	retinopathy	retinopathy	3.88E-06		-0.260	ABL1,ADAM15,ADRA1B,ADRA1D,ADRA2A,ADRA2B,ADRB1,ADRB2,AKR1B1,ALDH5A1,APOE,ATXN7,BBS2,BBS4,BEST1,BMP4,C1QTNF5,C2,C3,CA1,CA12,CA13,CA14,CA2,CA3,CA4,CA5B,CA7,CA9,CABP4,CACNA1F,CACNA2D4,CDH23,CEP290,CFB,CHM,CHRNA1,CHRNA10,CHRNA5,CHRNA7,CHRNA9,CHRNB1,CHRNB2,CHRND,CHRNE,CHRNG,CLCN3,CLCN7,CNGA1,CNGB1,CP,CRB1,CRP,CSF1R,CST3,DICER1,EDN1,EDNRB,EFEMP2,ELOVL4,EPAS1,ESR2,FBLN1,FBLN2,FBLN5,FGFR1,FGFR3,FKBP1A,FLT…	142
Small Molecule Biochemistry	metabolism	metabolism of nucleotide	4.04E-06		1.831	ABCA1,ABCC1,ABCG5,ACLY,ACPP,ACTC1,ADCY3,ADCY4,ADCY5,ADCY7,ADCY9,ADK,ADM,ADM2,ADNP,ADORA2A,ADORA2B,ADRA2A,ADRB1,ADRB2,ADRBK1,ADSL,ADSS,ADSSL1,AGT,AK1,AK2,AK3,AK5,AKAP12,AKAP5,ALDH2,ALDOA,AMPD3,ANGPT2,APOA1,APOE,APP,AQP1,ARR3 (includes EG:170735),ARRB1,ARRB2,ATP1A1,ATP1A2,ATP2B2,ATP5A1,ATP5B,ATP5C1,ATP5D,ATP5F1,ATP5G1,ATP5H,ATP5J,ATP5L,ATP5O,ATP6V1E1,ATP6V1E2,ATP6V1G2,ATP7A,BAD,BLM,BMP4,BMP6,BMP7,C…	283
Nucleic Acid Metabolism	metabolism	metabolism of nucleotide	4.04E-06		1.831	ABCA1,ABCC1,ABCG5,ACLY,ACPP,ACTC1,ADCY3,ADCY4,ADCY5,ADCY7,ADCY9,ADK,ADM,ADM2,ADNP,ADORA2A,ADORA2B,ADRA2A,ADRB1,ADRB2,ADRBK1,ADSL,ADSS,ADSSL1,AGT,AK1,AK2,AK3,AK5,AKAP12,AKAP5,ALDH2,ALDOA,AMPD3,ANGPT2,APOA1,APOE,APP,AQP1,ARR3 (includes EG:170735),ARRB1,ARRB2,ATP1A1,ATP1A2,ATP2B2,ATP5A1,ATP5B,ATP5C1,ATP5D,ATP5F1,ATP5G1,ATP5H,ATP5J,ATP5L,ATP5O,ATP6V1E1,ATP6V1E2,ATP6V1G2,ATP7A,BAD,BLM,BMP4,BMP6,BMP7,C…	283
Cell Cycle	interphase	interphase of fibroblasts	4.26E-06	Decreased	-2.615	ABL1,ATF2,ATF3,ATM,BAD,C11orf82,CBX2,CCND1,CCNE2,CD247,CDC25C,CDC7 (includes EG:12545),CDK2,CDKN1A,CDKN1B,CHEK1,CHEK2,CUL3 (includes EG:26554),E2F1,E2F2,E2F3,E2F4,GAB1,GADD45A,GRB10,ID2,ID3 (includes EG:15903),IRS1,JUN,JUNB,MAP3K5,MAPK3,MBD4,MYBL2,MYC,NBN,PARP1,PLK2,POLK,PRKDC,RAC1,RB1,SKP2 (includes EG:27401),SMARCA2,SRSF2,TFDP1,TP53 (includes EG:22059),TPP2	48
Protein Synthesis	expression	expression of protein	4.26E-06		1.550	ACO1,ADM,AHR,ALDH3A1,ALOX12,ANGPT2,APP,BCR,BMP2,BMP4,BMP7,C3,C5,CALR,CAV1,CAV3,CBS,CDKN1B,CKAP5,CNOT7,CPEB1,CTIF,CXCR4,CYP1A1,DARS,DDX25,DDX6,DHPS,DICER1,DLX5,DROSHA,DUS2L,EGFR,EIF2A,EIF2AK1,EIF2AK2,EIF2AK3,EIF2AK4,EIF2B1,EIF2B2,EIF2B3,EIF2B4,EIF2B5,EIF2C2,EIF2S2,EIF2S3,EIF3B,EIF3D,EIF3E,EIF3F,EIF3G,EIF3H,EIF3I,EIF3K,EIF3L,EIF4A3,EIF4B,EIF4E,EIF4EBP1,EIF4EBP2,EIF4G2,EIF4G3,EIF5,ERN1,EWSR1,FGF2,FG…	195
Molecular Transport	nuclear export	nuclear export of RNA	4.38E-06		-1.852	AGFG1,DDX19B,DDX25,DDX39A,DDX39B,EIF4E,EIF5A,FYTTD1,GLE1 (includes EG:2733),HHEX,KHDRBS1,NCBP1,NUDT4,NUP107,NUP133 (includes EG:234865),NUP160,NUP214,NUP98,NXF1,NXT1,PHAX,RAE1,SMG1,SMG5,SMG6,SMG7,THOC1,THOC2,THOC4,THOC5,THOC6,UPF1,UPF2,XPO1,XPO5,XPOT	36
RNA Trafficking	nuclear export	nuclear export of RNA	4.38E-06		-1.852	AGFG1,DDX19B,DDX25,DDX39A,DDX39B,EIF4E,EIF5A,FYTTD1,GLE1 (includes EG:2733),HHEX,KHDRBS1,NCBP1,NUDT4,NUP107,NUP133 (includes EG:234865),NUP160,NUP214,NUP98,NXF1,NXT1,PHAX,RAE1,SMG1,SMG5,SMG6,SMG7,THOC1,THOC2,THOC4,THOC5,THOC6,UPF1,UPF2,XPO1,XPO5,XPOT	36
Cellular Movement	cell movement	cell movement of endothelial cells	4.60E-06		-0.465	ADAM15,ADM,AGT,ALOX12,AMOT,AMOTL1,ANGPT1,ANGPT2,ANGPT4,ANGPTL1,ANGPTL3,ANGPTL4,ANXA3,APOE,ARHGAP24,ARRB2,AXL,BMP4,BMP6,BMPR2,BMX,CAMP,CAV1,CCR8,CD151,CD9,CDH13,CDH2,CDH5,COL18A1,COL4A1,COL4A2,CSF2,CSPG4,CXCL14,CXCR4,CYP1B1,CYR61,DCN,DLL4,DPP4,EDN1,EFNA1,EFNB2,ENG,ERAP1,ESAM,FGF1,FGF2,FLT1,FOXC2,G6PD,GAB1,GATA3,GIPC1,HAS3,HEY1,HGF,ICAM1,IGFBP3,IL1B,IL8,ITGA3,ITGA9,ITGAV,ITGB1,ITGB2,ITGB3,KDR,LGALS…	120
Cardiovascular System Development and Function	cell movement	cell movement of endothelial cells	4.60E-06		-0.465	ADAM15,ADM,AGT,ALOX12,AMOT,AMOTL1,ANGPT1,ANGPT2,ANGPT4,ANGPTL1,ANGPTL3,ANGPTL4,ANXA3,APOE,ARHGAP24,ARRB2,AXL,BMP4,BMP6,BMPR2,BMX,CAMP,CAV1,CCR8,CD151,CD9,CDH13,CDH2,CDH5,COL18A1,COL4A1,COL4A2,CSF2,CSPG4,CXCL14,CXCR4,CYP1B1,CYR61,DCN,DLL4,DPP4,EDN1,EFNA1,EFNB2,ENG,ERAP1,ESAM,FGF1,FGF2,FLT1,FOXC2,G6PD,GAB1,GATA3,GIPC1,HAS3,HEY1,HGF,ICAM1,IGFBP3,IL1B,IL8,ITGA3,ITGA9,ITGAV,ITGB1,ITGB2,ITGB3,KDR,LGALS…	120
Cancer	prostatic tumor	prostatic tumor	4.92E-06		0.252	ABCA5,ABCC4 (includes EG:10257),ABL1,ACO1,ACTC1,ADRB1,AFAP1,AGER,AGR2,AKR1B1,AKT2,AKT3 (includes EG:10000),ALDH1A1,ALDH2,ALDH5A1,ALDH7A1,ALOX12,ALOX5,AMFR,AMY2A,ANGPT1,ANO6,ANTXR1,ANTXR2,APOD,APOLD1,AR,ARG2 (includes EG:11847),ARHGDIB,ASPH,ASS1,ATP1A1,ATP1A2,ATP1A4,ATXN1,AURKA,AURKB,AXDND1,BAMBI,BCL2L1,BCR,BHLHE40,BIRC5,BMPR1A,BMPR1B,BMPR2,BMX,BRAF,BRF1 (includes EG:2972),BTG3,C3,C9orf5,CACNG3,CA…	422
Reproductive System Disease	prostatic tumor	prostatic tumor	4.92E-06		0.252	ABCA5,ABCC4 (includes EG:10257),ABL1,ACO1,ACTC1,ADRB1,AFAP1,AGER,AGR2,AKR1B1,AKT2,AKT3 (includes EG:10000),ALDH1A1,ALDH2,ALDH5A1,ALDH7A1,ALOX12,ALOX5,AMFR,AMY2A,ANGPT1,ANO6,ANTXR1,ANTXR2,APOD,APOLD1,AR,ARG2 (includes EG:11847),ARHGDIB,ASPH,ASS1,ATP1A1,ATP1A2,ATP1A4,ATXN1,AURKA,AURKB,AXDND1,BAMBI,BCL2L1,BCR,BHLHE40,BIRC5,BMPR1A,BMPR1B,BMPR2,BMX,BRAF,BRF1 (includes EG:2972),BTG3,C3,C9orf5,CACNG3,CA…	422
Carbohydrate Metabolism	uptake	uptake of carbohydrate	4.99E-06		-0.763	ABCA3,ABCB10,ACSL1,ADRA1D,ADRB1,AGT,AKT2,ALB,APOA1,APOE,APP,APPL1,ASPSCR1,BDKRB2,C1QL3,C5,CAV3,CD36,CPT1A,CPT1C,CRAT,CSF1 (includes EG:12977),CSF1R,CSF2,CTF1,CXCL14,DGKA,EDN1,EGR1,ELK1,ERBB3,ESRRA,FABP3,FGF21,FOXO4,G6PC,GAPVD1,GCK,GFPT1,GGPS1,GHR,GPAM,GSK3A,H6PD,HBEGF,HFE,HGF,HNF1A,HTT,IL1B,IL4 (includes EG:16189),IL6,IL7,IL8,INPP5K,INPPL1,INSR,INSRR,IRS1,KCNC1,KLF15,KLF4,LNPEP,LPL,MAPK9,MIF,MTM1…	128
Cell Cycle	interphase	interphase of connective tissue cells	4.99E-06	Decreased	-2.474	ABL1,ATF2,ATF3,ATM,BAD,BIRC5,C11orf82,CBX2,CCND1,CCNE2,CD247,CDC25C,CDC7 (includes EG:12545),CDK2,CDKN1A,CDKN1B,CHEK1,CHEK2,CUL3 (includes EG:26554),E2F1,E2F2,E2F3,E2F4,FGF2,GAB1,GADD45A,GRB10,ID2,ID3 (includes EG:15903),IGFBP7,IRS1,JUN,JUNB,MAP3K5,MAPK3,MBD4,MYBL2,MYC,NBN,PARP1,PLK2,POLK,PRKDC,RAC1,RB1,SKP2 (includes EG:27401),SMARCA2,SRSF2,TFDP1,TNF,TP53 (includes EG:22059),TPP2	52
Cell Death	cell death	cell death of leukemia cell lines	5.10E-06		-0.347	ABCB1,ABL1,AIFM1,AIMP1,ALK,ARG1,BAD,BAK1,BCL2A1,BCL2L1,BCR,BECN1,BIRC5,BTG1,C5,CAMP,CASP2,CASP3,CASP8,CASP9 (includes EG:100140945),CAT,CAV1,CCL25,CCND1,CD4,CD47,CD55,CD59 (includes EG:25407),CDH1,CDKN1A,CDKN1B,CEBPD,CERS1,CFLAR,CHKA,CREM,CSF2,CSF2RB,CTNNB1,CTSB,CTSD,CYCS,CYLD,DDIT3,DFFA,DIABLO,DNASE1,DNM1L,DUSP1,E2F1,EGR3,EPO,ERN1,FADD,FAF1 (includes EG:11124),FAIM3,FAS,FCER1A,FCGR1A,FGFR1,FGR,F…	185
Post-Translational Modification	dephosphorylation	dephosphorylation of protein	5.11E-06		-0.286	BTRC,CDC14B,CTDNEP1,CTDSP1,CTDSP2,DUSP1,DUSP11,DUSP12,DUSP19,DUSP3,DUSP6,DUSP7,EPM2A,EYA1,FBXW11,ILKAP,KDR,MTM1,MTMR3,MTMR7,NCEH1,PDP1,PDXP,PHPT1,PPAP2A,PPEF1,PPEF2,PPM1A,PPM1F,PPM1G,PPM1M,PPP1CA,PPP1CB,PPP1CC,PPP1R14D,PPP2CA,PPP2CB,PPP2R1A,PPP2R2A,PPP3CA,PPP3CB,PPP3R1,PPP6C,PTEN,PTPLA,PTPN1,PTPN11,PTPN12,PTPN14,PTPN18,PTPN2,PTPN21,PTPN22,PTPN3,PTPN4,PTPN5,PTPN6,PTPN7,PTPN9,PTPRB,PTPRC,PTPRD,PTPR…	72
Cellular Development	differentiation	differentiation of lymphocytes	5.44E-06	Increased	3.277	ABL1,ADA,ADAM17,AHR,AP3B1,AP3D1,APC,ATM,ATP7A,AXL,BAD,BCL2A1,BCL3,BCL6,BLM,BLNK,BMI1,BMP4,BTK,CARD11,CBFB,CCR7,CD14,CD274,CD3D,CD3E,CD4,CD40,CD80 (includes EG:12519),CD86,CD8A,CDKN1B,CHD7,CRTC2,CSF2,CTNNB1,CXCR4,DCLRE1C,DEF6,DICER1,DLL4,DNAJA3,DTX1,EBF1,EGR1,EGR3,EIF2AK4,ELK1,ELK4,ETS1,FANCC,FAS,FCGR2B,FLT3,FLT3LG,FOS,FOXP3,FZD5,FZD7,FZD9,GADD45G,GATA3,GFI1,GLI3,GRB2,HDAC4,HDAC5,HDAC7,HDAC9,HELLS…	236
Hematological System Development and Function	differentiation	differentiation of lymphocytes	5.44E-06	Increased	3.277	ABL1,ADA,ADAM17,AHR,AP3B1,AP3D1,APC,ATM,ATP7A,AXL,BAD,BCL2A1,BCL3,BCL6,BLM,BLNK,BMI1,BMP4,BTK,CARD11,CBFB,CCR7,CD14,CD274,CD3D,CD3E,CD4,CD40,CD80 (includes EG:12519),CD86,CD8A,CDKN1B,CHD7,CRTC2,CSF2,CTNNB1,CXCR4,DCLRE1C,DEF6,DICER1,DLL4,DNAJA3,DTX1,EBF1,EGR1,EGR3,EIF2AK4,ELK1,ELK4,ETS1,FANCC,FAS,FCGR2B,FLT3,FLT3LG,FOS,FOXP3,FZD5,FZD7,FZD9,GADD45G,GATA3,GFI1,GLI3,GRB2,HDAC4,HDAC5,HDAC7,HDAC9,HELLS…	236
Hematopoiesis	differentiation	differentiation of lymphocytes	5.44E-06	Increased	3.277	ABL1,ADA,ADAM17,AHR,AP3B1,AP3D1,APC,ATM,ATP7A,AXL,BAD,BCL2A1,BCL3,BCL6,BLM,BLNK,BMI1,BMP4,BTK,CARD11,CBFB,CCR7,CD14,CD274,CD3D,CD3E,CD4,CD40,CD80 (includes EG:12519),CD86,CD8A,CDKN1B,CHD7,CRTC2,CSF2,CTNNB1,CXCR4,DCLRE1C,DEF6,DICER1,DLL4,DNAJA3,DTX1,EBF1,EGR1,EGR3,EIF2AK4,ELK1,ELK4,ETS1,FANCC,FAS,FCGR2B,FLT3,FLT3LG,FOS,FOXP3,FZD5,FZD7,FZD9,GADD45G,GATA3,GFI1,GLI3,GRB2,HDAC4,HDAC5,HDAC7,HDAC9,HELLS…	236
Cell Cycle	modification	modification of chromatin	5.57E-06		-0.954	ACTL6A,ACTL6B,ARID1A,BAZ1A,BAZ1B,BAZ2A,BNIP3,BPTF,C14orf169,CEBPG,CHD1,CHD1L,EHMT1,FLCN,FOXA1,GATA3,HDAC1,HDAC11,HDAC2,HDAC3,HDAC4,HDAC5,HDAC7,HDAC9,HMG20B,HNF1A,HSF1 (includes EG:15499),IL2RA,INO80 (includes EG:296084),KLF1,MEN1,MORF4L1,MTA2,NR3C1,OTUB1,PCNA,POU2F1,RB1,RBBP7,REL,RERE,SATB2,SCMH1,SMARCA2,SMARCA5,SMARCB1,SMARCC1,SMARCD1,SMARCD2,SMARCD3,SMARCE1,SMYD1,STAT6,SUPT4H1,SUV39H2,TAF6L,TTF…	58
DNA Replication, Recombination, and Repair	modification	modification of chromatin	5.57E-06		-0.954	ACTL6A,ACTL6B,ARID1A,BAZ1A,BAZ1B,BAZ2A,BNIP3,BPTF,C14orf169,CEBPG,CHD1,CHD1L,EHMT1,FLCN,FOXA1,GATA3,HDAC1,HDAC11,HDAC2,HDAC3,HDAC4,HDAC5,HDAC7,HDAC9,HMG20B,HNF1A,HSF1 (includes EG:15499),IL2RA,INO80 (includes EG:296084),KLF1,MEN1,MORF4L1,MTA2,NR3C1,OTUB1,PCNA,POU2F1,RB1,RBBP7,REL,RERE,SATB2,SCMH1,SMARCA2,SMARCA5,SMARCB1,SMARCC1,SMARCD1,SMARCD2,SMARCD3,SMARCE1,SMYD1,STAT6,SUPT4H1,SUV39H2,TAF6L,TTF…	58
Cell Death	apoptosis	apoptosis of leukemia cell lines	5.58E-06		-0.426	ABL1,AIFM1,AIMP1,ALK,ARG1,BAD,BAK1,BCL2A1,BCL2L1,BCR,BECN1,BIRC5,C5,CAMP,CASP2,CASP3,CASP8,CASP9 (includes EG:100140945),CAT,CAV1,CCL25,CCND1,CD4,CD47,CD55,CD59 (includes EG:25407),CDH1,CDKN1A,CDKN1B,CEBPD,CERS1,CFLAR,CHKA,CREM,CSF2,CSF2RB,CTNNB1,CTSD,CYCS,DDIT3,DFFA,DIABLO,DNM1L,DUSP1,E2F1,EGR3,EPO,ERN1,FADD,FAF1 (includes EG:11124),FAIM3,FAS,FCER1A,FCGR1A,FGFR1,FGR,FKBP5,FLT3LG,FOXO3,GATA1,GFI1…	166
Hematological System Development and Function	quantity	quantity of mononuclear leukocytes	5.62E-06	Increased	2.218	ABCG2,AFF1,AGT,AHR,ANK2,APOA1,APOE,APP,ATM,BAD,BCL10,BCL2A1,BCL2L1,BIRC5,BLM,BLNK,BMI1,BST1 (includes EG:12182),BTK,C3,CAMP,CARD11,CARM1,CASP8,CBFB,CBS,CCL5,CCR6,CCR7,CD180,CD244,CD247,CD27,CD274,CD3D,CD3E,CD3G,CD4,CD40,CD47,CD72,CD80 (includes EG:12519),CD83,CD86,CDKN1A,CDKN1B,CFLAR,CHRNA1,CHST3,CHST4,CHUK,CIITA,CISH,CLEC11A,CNN2,CORT,CREB1,CREBBP,CRIP3,CSF1 (includes EG:12977),CSF2,CSF2RB,CTSL2…	300
Tissue Morphology	quantity	quantity of mononuclear leukocytes	5.62E-06	Increased	2.218	ABCG2,AFF1,AGT,AHR,ANK2,APOA1,APOE,APP,ATM,BAD,BCL10,BCL2A1,BCL2L1,BIRC5,BLM,BLNK,BMI1,BST1 (includes EG:12182),BTK,C3,CAMP,CARD11,CARM1,CASP8,CBFB,CBS,CCL5,CCR6,CCR7,CD180,CD244,CD247,CD27,CD274,CD3D,CD3E,CD3G,CD4,CD40,CD47,CD72,CD80 (includes EG:12519),CD83,CD86,CDKN1A,CDKN1B,CFLAR,CHRNA1,CHST3,CHST4,CHUK,CIITA,CISH,CLEC11A,CNN2,CORT,CREB1,CREBBP,CRIP3,CSF1 (includes EG:12977),CSF2,CSF2RB,CTSL2…	300
Cancer	gastric carcinoma	gastric carcinoma	5.65E-06			ACVR2A,APC,APOE,ATG4B,BRAF,C9orf86,CASP8,CCDC28A,CDK4,COBLL1,COL1A1,COL1A2,CSF1R,CTNNB1,DDX39B,DSTN,FGFR2,FHIT,FLT1,FUS,GCC2,GSTP1,HNRNPH1,IGF2R,KDM5A,KDR,KIT,KRAS,LARP7,MBD4,MKI67,MSH3 (includes EG:17686),MSH6,MYBL1,NDUFC2,NQO1,NR3C1,NRIP1,P4HB,PA2G4,PDGFRA,PDGFRB,PIK3CA,POR,PRCC,PRKCI,PTPN21,SEC31A,SEC63 (includes EG:11231),SERPINE2,SLC16A4,SLC17A2,TGFBR2,TMEM97,TOP2A,TTC3,TTK,TYMS,UBE2C,USP1,V…	62
Gastrointestinal Disease	gastric carcinoma	gastric carcinoma	5.65E-06			ACVR2A,APC,APOE,ATG4B,BRAF,C9orf86,CASP8,CCDC28A,CDK4,COBLL1,COL1A1,COL1A2,CSF1R,CTNNB1,DDX39B,DSTN,FGFR2,FHIT,FLT1,FUS,GCC2,GSTP1,HNRNPH1,IGF2R,KDM5A,KDR,KIT,KRAS,LARP7,MBD4,MKI67,MSH3 (includes EG:17686),MSH6,MYBL1,NDUFC2,NQO1,NR3C1,NRIP1,P4HB,PA2G4,PDGFRA,PDGFRB,PIK3CA,POR,PRCC,PRKCI,PTPN21,SEC31A,SEC63 (includes EG:11231),SERPINE2,SLC16A4,SLC17A2,TGFBR2,TMEM97,TOP2A,TTC3,TTK,TYMS,UBE2C,USP1,V…	62
Cell Cycle	mitosis	arrest in mitosis	5.67E-06			ACRBP,APC,AURKB,BIRC5,BUB1 (includes EG:100307076),BUB1B,CCNE1,CDK1,CDK19,CDKN1A,CDKN1B,CENPI,CHEK1,CHEK2,CKAP2,CLIP1,CSE1L,EIF3E,FOXO3,HDAC4,KNTC1,MAPK14,MAPRE1,NEK7,NUDCD3,NUMA1,PAFAH1B1,PLK1,PTEN,PURA,RIC8A,SGOL1,TCP1,TP53 (includes EG:22059),TRRAP,UBE2S,ZW10,ZWINT	38
Post-Translational Modification	homotetramerization	homotetramerization of protein	5.67E-06			ACADL,ACADM,ACADS,ACOT13,ACTN2,ALDH1A1,ALDH5A1,ALDOC,CBR4,CDA,CRYZ,CTH,DCTPP1,DECR1,DHPS,DPYS,GFPT1,GNMT,GPX3,HPRT1,HSD17B10,IDE,IMPDH2,KCNJ10,PCBD1,PFKL,PFKM,PFKP,PPAT,SHMT1,SHMT2,SOD2,SRR,TH,TK1,TP63,TRPM8,USP16	38
Protein Synthesis	homotetramerization	homotetramerization of protein	5.67E-06			ACADL,ACADM,ACADS,ACOT13,ACTN2,ALDH1A1,ALDH5A1,ALDOC,CBR4,CDA,CRYZ,CTH,DCTPP1,DECR1,DHPS,DPYS,GFPT1,GNMT,GPX3,HPRT1,HSD17B10,IDE,IMPDH2,KCNJ10,PCBD1,PFKL,PFKM,PFKP,PPAT,SHMT1,SHMT2,SOD2,SRR,TH,TK1,TP63,TRPM8,USP16	38
Cell Death	apoptosis	apoptosis of bone cancer cell lines	6.06E-06		-1.345	ABL1,ARRB2,ATG10 (includes EG:641330),ATG5 (includes EG:11793),ATMIN,AXIN1,BCL6,BCLAF1,BHLHE40,BIRC5,BMP2,BMPR1B,BNIP3,BRCA1,CABLES2,CAPNS1,CASP8,CASP9 (includes EG:100140945),CAV1,CDH1,CDK6,CDKN1A,CFLAR,DNAJA3,E2F1,E2F3,ERG,ETHE1,ETS1,EWSR1,FAS,FLI1,GNB2L1,GPS2,HCK,HDAC5,HUWE1,IGFBP5,KITLG,MAD1L1,MCL1,MDM4,MOB2 (includes EG:101513),MYC,NDN,NLRC4,NR3C1,NUPR1,OSGIN1,PADI4,PIAS1,PLAGL1,PLK1,PML,PPP…	79
Post-Translational Modification	proteolysis	proteolysis	6.54E-06		0.381	ADAM17,ADAMTS13,ADAMTS20,ADAMTS4,ADAMTS9,ADRM1,ALOX12,ALOX15,ALOX5,ANPEP,APOE,AQPEP,ATG4A,ATG4B,ATG4C,AURKAIP1,BACE1,BAG6,BMP1,BTRC,C1S,C3,C9orf3,CAPN1,CAPN10,CAPN2,CAPN3,CAPNS1,CASP2,CASP3,CASP4,CASP6,CASP7,CASP8,CASP9 (includes EG:100140945),CD46,CFI,CLN6,CMA1,CNDP1,CNDP2,CORIN,CPA1 (includes EG:109697),CPN1,CTSB,CTSC,CTSD,CTSH,CTSK,CTSL1,CTSL2,CTSS,DIAPH3,DLD,DPEP3,DPP3,DPP4,DSPP,ECE1,ENDOU,EN…	148
Protein Degradation	proteolysis	proteolysis	6.54E-06		0.381	ADAM17,ADAMTS13,ADAMTS20,ADAMTS4,ADAMTS9,ADRM1,ALOX12,ALOX15,ALOX5,ANPEP,APOE,AQPEP,ATG4A,ATG4B,ATG4C,AURKAIP1,BACE1,BAG6,BMP1,BTRC,C1S,C3,C9orf3,CAPN1,CAPN10,CAPN2,CAPN3,CAPNS1,CASP2,CASP3,CASP4,CASP6,CASP7,CASP8,CASP9 (includes EG:100140945),CD46,CFI,CLN6,CMA1,CNDP1,CNDP2,CORIN,CPA1 (includes EG:109697),CPN1,CTSB,CTSC,CTSD,CTSH,CTSK,CTSL1,CTSL2,CTSS,DIAPH3,DLD,DPEP3,DPP3,DPP4,DSPP,ECE1,ENDOU,EN…	148
Protein Synthesis	proteolysis	proteolysis	6.54E-06		0.381	ADAM17,ADAMTS13,ADAMTS20,ADAMTS4,ADAMTS9,ADRM1,ALOX12,ALOX15,ALOX5,ANPEP,APOE,AQPEP,ATG4A,ATG4B,ATG4C,AURKAIP1,BACE1,BAG6,BMP1,BTRC,C1S,C3,C9orf3,CAPN1,CAPN10,CAPN2,CAPN3,CAPNS1,CASP2,CASP3,CASP4,CASP6,CASP7,CASP8,CASP9 (includes EG:100140945),CD46,CFI,CLN6,CMA1,CNDP1,CNDP2,CORIN,CPA1 (includes EG:109697),CPN1,CTSB,CTSC,CTSD,CTSH,CTSK,CTSL1,CTSL2,CTSS,DIAPH3,DLD,DPEP3,DPP3,DPP4,DSPP,ECE1,ENDOU,EN…	148
Cellular Growth and Proliferation	proliferation	proliferation of smooth muscle cells	6.70E-06		1.905	ABCC4 (includes EG:10257),ADM,AGER,AGT,AGTRAP,AIF1 (includes EG:11629),AKR1B1,ANG,APOE,ARG1,ATP2B1,BMP4,BMPR2,CACNA1G,CALCRL,CAPN2,CAV1,CCNE1,CDH13,CDKN1A,CDKN1B,CDKN1C,CEBPD,CMA1,COMT,CTNNBIP1,CXCL16,E2F3,E4F1,EDN1,EDNRA,EGFR,ELAVL1,ELN,F2,FBLN5,FGF2,FGFR2,FLT1,FOXM1,FOXO1 (includes EG:2308),GNAQ,GSK3B,HABP2,HBEGF,HES5,HIF1A,HMOX1,ID2,IGFBP3,IGFBP5,IL12A,IL12B,IL15 (includes EG:16168),IL1A,IL1B,…	117
Skeletal and Muscular System Development and Function	proliferation	proliferation of smooth muscle cells	6.70E-06		1.905	ABCC4 (includes EG:10257),ADM,AGER,AGT,AGTRAP,AIF1 (includes EG:11629),AKR1B1,ANG,APOE,ARG1,ATP2B1,BMP4,BMPR2,CACNA1G,CALCRL,CAPN2,CAV1,CCNE1,CDH13,CDKN1A,CDKN1B,CDKN1C,CEBPD,CMA1,COMT,CTNNBIP1,CXCL16,E2F3,E4F1,EDN1,EDNRA,EGFR,ELAVL1,ELN,F2,FBLN5,FGF2,FGFR2,FLT1,FOXM1,FOXO1 (includes EG:2308),GNAQ,GSK3B,HABP2,HBEGF,HES5,HIF1A,HMOX1,ID2,IGFBP3,IGFBP5,IL12A,IL12B,IL15 (includes EG:16168),IL1A,IL1B,…	117
Cancer	growth	growth of tumor	6.72E-06	Decreased	-2.368	ABCC1,ADAM17,ADAM9,ADAMTS1,AGT,AHR,AIMP1,ANG,ANGPT2,ANGPTL4,ANTXR1,APC,ARRB2,AURKA,B4GALNT1,BDKRB2,BMP4,BMX,BRAF,CARD10,CASP3,CD274,CD36,CD40,CD59 (includes EG:25407),CD80 (includes EG:12519),CDKN1A,CDKN1B,COL18A1,COL4A1,COL4A3,CRABP2,CREBBP,CSF2,CST3,CTNNB1,CTSB,CTSL2,CTSS,CTTN,DAB2IP,DNMT1,DNMT3B,EGFR,EHF,ENTPD1,EPAS1,EPHA2,EPHB4,FAS,FBLN5,FCGR3A,FEZF1,FGFR1,FGFR2,FHIT,FLT1,FLT3,FOXM1,FTH1 (inc…	173
Inflammatory Response	inflammation	inflammation of organ	6.72E-06		-0.528	ADA,ADORA2A,ADORA2B,AGER,AGT,ALOX15,AMBP,ANGPT1,ANXA5,APOA1,APOE,APP,APRT,BCL6,BMX,CA1,CA12,CA13,CA14,CA2,CA3,CA4,CA5B,CA7,CA9,CASP3,CAV1,CAV3,CCBP2,CCL22,CCR4,CD14,CD200,CD47,CD55,CFB,CLU,CORT,CSF2,CST6 (includes EG:1474),CTSL1,CTSL2,CTSS,CXCL2,CXCR3,CYLD,DSG3,EGFR,EGR1,ENTPD1,F2,F2RL1,FAS,FCGR2B,FLT3LG,FOXJ1,FOXO3,HDAC1,HGF,HMOX1,HP,HRH1,ICAM1,IFNAR1,IKBKB,IL11RA,IL12A,IL12B,IL17RA,IL17RB,IL1A,…	173
Cellular Assembly and Organization	morphogenesis	morphogenesis of neurites	6.79E-06		0.383	ACHE,ACTR3,ADORA2A,AGER,AKAP5,ALS2,APC,APP,ATP7A,ATXN10,BMP7,BTG2,CACNA1A,CACNA1F,CDK5,CDK5R1,CELSR2,CHRNB2,CIT,CLU,CNTNAP1,DOCK7,DTNBP1,DVL1,DYNLT1,EFHD1,EFNA5,EGFR,FGFR1,GALR2,GAS7,GDNF,GJA1,GSK3B,HPRT1,IGF1R,IL6,ILK,ITGA1,ITGB1,KDR,KLF7,KLK8,L1CAM,LAMA1,LAMC1,LIFR,LINGO1,LYN,LZTS1,MAP1S,MAP2K1,MAPK8,MAPK9,MECP2,MET,MNX1,MYH10,NBL1 (includes EG:17965),NCDN,NGF,NR2E1,NRTN,NUMB,NUMBL,PAK1,PALLD,P…	100
Tissue Development	morphogenesis	morphogenesis of neurites	6.79E-06		0.383	ACHE,ACTR3,ADORA2A,AGER,AKAP5,ALS2,APC,APP,ATP7A,ATXN10,BMP7,BTG2,CACNA1A,CACNA1F,CDK5,CDK5R1,CELSR2,CHRNB2,CIT,CLU,CNTNAP1,DOCK7,DTNBP1,DVL1,DYNLT1,EFHD1,EFNA5,EGFR,FGFR1,GALR2,GAS7,GDNF,GJA1,GSK3B,HPRT1,IGF1R,IL6,ILK,ITGA1,ITGB1,KDR,KLF7,KLK8,L1CAM,LAMA1,LAMC1,LIFR,LINGO1,LYN,LZTS1,MAP1S,MAP2K1,MAPK8,MAPK9,MECP2,MET,MNX1,MYH10,NBL1 (includes EG:17965),NCDN,NGF,NR2E1,NRTN,NUMB,NUMBL,PAK1,PALLD,P…	100
Nervous System Development and Function	morphogenesis	morphogenesis of neurites	6.79E-06		0.383	ACHE,ACTR3,ADORA2A,AGER,AKAP5,ALS2,APC,APP,ATP7A,ATXN10,BMP7,BTG2,CACNA1A,CACNA1F,CDK5,CDK5R1,CELSR2,CHRNB2,CIT,CLU,CNTNAP1,DOCK7,DTNBP1,DVL1,DYNLT1,EFHD1,EFNA5,EGFR,FGFR1,GALR2,GAS7,GDNF,GJA1,GSK3B,HPRT1,IGF1R,IL6,ILK,ITGA1,ITGB1,KDR,KLF7,KLK8,L1CAM,LAMA1,LAMC1,LIFR,LINGO1,LYN,LZTS1,MAP1S,MAP2K1,MAPK8,MAPK9,MECP2,MET,MNX1,MYH10,NBL1 (includes EG:17965),NCDN,NGF,NR2E1,NRTN,NUMB,NUMBL,PAK1,PALLD,P…	100
Cell Cycle	interphase	entry into interphase	6.86E-06		-1.650	ABL1,APC,APP,ARAF,ATM,BCR,BHLHE40,BMP7,BRAF,C13orf15,CBX2,CCND1,CCND3,CD40,CDC25A,CDC6 (includes EG:23834),CDH1,CDK2,CDKN1A,CDKN1B,CDKN1C,CHEK2,CHRNA7,CREBBP,DDX3X,DMTF1,E2F1,E2F2,E2F3,E2F4,E2F6,E2F8,ESR2,F2,FGF2,FOS,FOXM1,GAS1 (includes EG:14451),GORASP2,GTF2I,HBEGF,HINFP,HMGA1,HMOX1,ID2,ID3 (includes EG:15903),IL1B,IL4 (includes EG:16189),IL4R,IL6,IL7,IRS1,ITGB1,JUNB,KLF4,KRAS,LMNA,MAP3K8,MAX,M…	93
Cell Morphology	size	size of cells	7.01E-06		-0.183	ADA,ADD1,ADD2,ADRA1B,ADRB2,AGPAT6,AGT,AHR,AKT1S1,AKT2,ALOX12,ALOX15,ANGPT2,APC,APOE,AQP1,AQP5,AR,ARHGEF4,ATP2B2,BCL2L1,BCL3,BCMO1,BDNF,BLNK,BTRC,CASQ2,CAV3,CBL,CBS,CCND1,CCND3,CD180,CD40,CDK2,CDK4,CDKN1A,CDKN1B,CFL1,CHRM5,CLN8,COL18A1,CREB1,CSF1 (includes EG:12977),CSF2,CUL3 (includes EG:26554),CYP19A1,DEPTOR,DICER1,DSTN,DYRK1A,E2F1,E2F2,E2F4,EDN1,FAS,FASN,FBXW7,FGF13,FGF2,FOXO1 (includes EG:2308…	179
Developmental Disorder	hypertrophy	hypertrophy of heart cells	7.09E-06		1.284	ADRB1,AGT,ANGPT2,ARAF,CACNA1H,CAMK2D,CAV1,CAV3,COL9A2,CRYAB,CSRP3,CTF1,CTSB,CTSC,CTSD,DICER1,DNAJC3,DUSP1,DYRK1A,EDN1,EEF1D,EPAS1,FBXO32,FOXO3,FSTL3,GAL,GLRX3,GNAQ,GPX3,GSK3B,H2AFZ,HBEGF,HCK,HDAC2,HDAC5,HDAC9,HPRT1,HSPB8,IL18 (includes EG:16173),INHA,INHBA,JUN,LCAT,LIF,MAP2K3,MAP2K4,MAP2K6,MAP2K7,MAP3K7 (includes EG:172842),MAPK14,MAPK7,MAPK8,MMP9,MNT,MTOR,MYBPC3,MYOM1,NCF1,NFATC2,NPPA,OSM,PIM1,P…	84
Cardiovascular Disease	hypertrophy	hypertrophy of heart cells	7.09E-06		1.284	ADRB1,AGT,ANGPT2,ARAF,CACNA1H,CAMK2D,CAV1,CAV3,COL9A2,CRYAB,CSRP3,CTF1,CTSB,CTSC,CTSD,DICER1,DNAJC3,DUSP1,DYRK1A,EDN1,EEF1D,EPAS1,FBXO32,FOXO3,FSTL3,GAL,GLRX3,GNAQ,GPX3,GSK3B,H2AFZ,HBEGF,HCK,HDAC2,HDAC5,HDAC9,HPRT1,HSPB8,IL18 (includes EG:16173),INHA,INHBA,JUN,LCAT,LIF,MAP2K3,MAP2K4,MAP2K6,MAP2K7,MAP3K7 (includes EG:172842),MAPK14,MAPK7,MAPK8,MMP9,MNT,MTOR,MYBPC3,MYOM1,NCF1,NFATC2,NPPA,OSM,PIM1,P…	84
Skeletal and Muscular System Development and Function	development	development of skeleton	7.09E-06		-1.385	ACVR1,ACVR2A,ACVR2B,ADRB2,AHSG,ALOX15,ALPL,ANKH,ASPN,ATP6V0A4,ATP6V1B1,BGN,BMI1,BMP2,BMP4,BMP6,BMP7,BMPR1A,BMPR1B,BMPR2,CALCB,CASP3,CBFB,CBS,CD276,CDON,CHRD,CHST11,CHUK,CIITA,COL10A1,COL11A1,COL11A2,COL1A1,CSF1 (includes EG:12977),CTBP1,CTBP2,CTGF,CTNNB1,CYP24A1,CYP27B1,DLX5,DLX6,DSPP,DUOX2,E2F1,ECM1 (includes EG:100332249),EGFR,EIF2AK3,ENPP1,ERCC2,ESRRA,EXT1,EXT2,EYA1,FGF18,FGF2,FGFR2,FGFR3,FMOD…	165
Cell Death	inhibition	inhibition of apoptosis	7.39E-06			ACAA2,ADAM17,ADM,ALOX12,AMIGO2,ANGPT1,ANGPT4,ANXA4,ANXA5,API5,APOE,ARRB1,ATF5,AVEN,AXL,BAG3,BAG4,BCL2A1,BCL2L1,BCL2L2,BDNF,BECN1,BFAR,BIRC3,BIRC5,BNIP1,BNIP2,BNIP3,BRAF,BRE,BRMS1,BTG2,CAV1,CD27,CD59 (includes EG:25407),CDK1,CDKN1A,CDKN2D,CFDP1,CFL1,CFLAR,CIAPIN1,CLU,COMP,CRYAB,CTNNB1,DAD1 (includes EG:13135),DAPK1,DDAH2,DHCR24,DNAJB9,DUSP1,EEF1A2,ERC1,FAIM,FAIM3,FAS,FOXC2,FOXO1 (includes EG:2308)…	157
Cell Death	cell death	cell death of embryonic cells	7.58E-06		-0.426	AIFM1,APC,ATF1 (includes EG:100040260),ATM,ATP2C1,BCAP31,BLM,BMP4,BMP7,BMPR1A,BMPR1B,CASP3,CDC7 (includes EG:12545),CHEK1,CREB1,CTNNB1,DHX9,DNMT3A,DNMT3B,EIF2C1,EIF2C2,EIF2C3,EIF2C4,ETS1,ETV6,EYA1,FAS,FOXP1,HIF1A,HMGA1,HTT,IL6ST,ITGA5,ITGAV,JAG2,LIG4,LIMS3L,MAP2K4,MAP3K1,MSH2,MSX1,MSX2,NKX2-5,NOS2,NRP1 (includes EG:18186),PAXIP1,PIAS2,PIK3R1,PLCD3,POLK,POR,PRPF19,PTHLH,RAC1,RAD9A,RB1,SALL1,SIX1,S…	69
Embryonic Development	cell death	cell death of embryonic cells	7.58E-06		-0.426	AIFM1,APC,ATF1 (includes EG:100040260),ATM,ATP2C1,BCAP31,BLM,BMP4,BMP7,BMPR1A,BMPR1B,CASP3,CDC7 (includes EG:12545),CHEK1,CREB1,CTNNB1,DHX9,DNMT3A,DNMT3B,EIF2C1,EIF2C2,EIF2C3,EIF2C4,ETS1,ETV6,EYA1,FAS,FOXP1,HIF1A,HMGA1,HTT,IL6ST,ITGA5,ITGAV,JAG2,LIG4,LIMS3L,MAP2K4,MAP3K1,MSH2,MSX1,MSX2,NKX2-5,NOS2,NRP1 (includes EG:18186),PAXIP1,PIAS2,PIK3R1,PLCD3,POLK,POR,PRPF19,PTHLH,RAC1,RAD9A,RB1,SALL1,SIX1,S…	69
Cancer	myeloid leukemia	myeloid leukemia	7.64E-06		-0.610	ABCB1,ABCC1,ABCG2,ABL1,ADORA2A,ALOX5,AMY2A,ARHGAP26,ASXL1,AURKA,AURKB,AXL,BAALC,BCL2L1,BCR,BRAF,CBFB,CBL,CD80 (includes EG:12519),CD86,CDKN2B,CHIC2,CPT1A,CPT1B,CSF1R,CSF2,CSF2RB,CTNNB1,CUX1,CUX2,CXCR4,CYP3A4,DCK,DPP4,E2F1,E2F3,EGFR,EPHA2,EPHX1,EPO,ERCC2,ERG,ETV6,EZH2,FGFR1,FGFR2,FGFR3,FGR,FKBP1A,FLT1,FLT3,FNTA,FNTB,FOXO1 (includes EG:2308),FOXO3,FOXP1,FYN,GATA1,GATA2,GMPS,GSTM1,GSTP1,HDAC1,HDAC3,…	141
Hematological Disease	myeloid leukemia	myeloid leukemia	7.64E-06		-0.610	ABCB1,ABCC1,ABCG2,ABL1,ADORA2A,ALOX5,AMY2A,ARHGAP26,ASXL1,AURKA,AURKB,AXL,BAALC,BCL2L1,BCR,BRAF,CBFB,CBL,CD80 (includes EG:12519),CD86,CDKN2B,CHIC2,CPT1A,CPT1B,CSF1R,CSF2,CSF2RB,CTNNB1,CUX1,CUX2,CXCR4,CYP3A4,DCK,DPP4,E2F1,E2F3,EGFR,EPHA2,EPHX1,EPO,ERCC2,ERG,ETV6,EZH2,FGFR1,FGFR2,FGFR3,FGR,FKBP1A,FLT1,FLT3,FNTA,FNTB,FOXO1 (includes EG:2308),FOXO3,FOXP1,FYN,GATA1,GATA2,GMPS,GSTM1,GSTP1,HDAC1,HDAC3,…	141
Cellular Assembly and Organization	organization	organization of actin cytoskeleton	7.96E-06		0.846	ABL1,ADRA1B,ADRA2A,AMOT,ANTXR1,ARFIP2,ARHGDIB,ARHGEF18,ARPC1A,ATP2C1,AXL,BAIAP2,BCAR1,BCL6,BCR,BST2,CALR,CAP2,CAPN10,CCDC88A,CCR7,CDC42BPA,CDC42EP2,CDK5,CFL1,CLU,CORO1A,CORO1C,CRK,CSRP1,CXADR,CXCL9,CYTH2,DTNBP1,DYNLL1,EFNA1,EFNA5,EHD2,ENG,EPB41,EPS8,F2RL1,FGD1,FGF7,FGR,FHL3,FLII,FLNA,FLNB,FOXJ1,FSCN1,FZD10,GAS6,GPR65,GRID2IP,ICAM1,ILK,KCTD13,KLHL17,KRAS,LLGL1,LOC643751,LPIN1,MINK1,MLST8,MRAS,MST1…	123
Cellular Function and Maintenance	organization	organization of actin cytoskeleton	7.96E-06		0.846	ABL1,ADRA1B,ADRA2A,AMOT,ANTXR1,ARFIP2,ARHGDIB,ARHGEF18,ARPC1A,ATP2C1,AXL,BAIAP2,BCAR1,BCL6,BCR,BST2,CALR,CAP2,CAPN10,CCDC88A,CCR7,CDC42BPA,CDC42EP2,CDK5,CFL1,CLU,CORO1A,CORO1C,CRK,CSRP1,CXADR,CXCL9,CYTH2,DTNBP1,DYNLL1,EFNA1,EFNA5,EHD2,ENG,EPB41,EPS8,F2RL1,FGD1,FGF7,FGR,FHL3,FLII,FLNA,FLNB,FOXJ1,FSCN1,FZD10,GAS6,GPR65,GRID2IP,ICAM1,ILK,KCTD13,KLHL17,KRAS,LLGL1,LOC643751,LPIN1,MINK1,MLST8,MRAS,MST1…	123
Tissue Development	adhesion	adhesion of extracellular matrix	8.30E-06		-0.677	ACER2,ADAM15,ADAM8,ADAM9,AGT,ANGPTL3,BCAM,BCAP31,BCL6,CD151,CD9,CDH1,CDK5,COL17A1,COL3A1,COL5A3,CTGF,CTNNB1,ECM2 (includes EG:1842),EDA,EPHA2,FBLN5,FREM1,FXC1,HOXA7,HPSE,ITGA10,ITGA11,ITGA2,ITGA2B,ITGA3,ITGA5,ITGA6,ITGA7,ITGAV,ITGB1,ITGB1BP1,ITGB3,JAM3,LIMS3L,LYPD3,MIA,NF2,NID1,NPNT,PIK3R1,PLXND1,PPFIA1,RASA1,RHOA,SGCE,SORBS1,SPP1 (includes EG:20750),TEK,THBS1,TMEM8B,TNN,TNXB,VCAN	59
Inflammatory Response	inflammation	inflammation	8.32E-06		-0.059	ABCC1,ADA,ADIPOR1,ADIPOR2,ADORA2A,ADORA2B,AGER,AGT,AKT2,ALCAM,ALOX12,ALOX15,ALOX5,ALOX5AP,AMBP,ANGPT1,ANPEP,ANXA5,APOA1,APOE,APP,APRT,AR,BCL6,BDKRB2,BMX,C3,C5,CA1,CA12,CA13,CA14,CA2,CA3,CA4,CA5B,CA7,CA9,CALCB,CARD11,CASP3,CASP8,CAV1,CAV3,CCBP2,CCL22,CCL5,CCR4,CD14,CD200,CD276,CD47,CD48,CD55,CD86,CFB,CLU,CORT,CSF2,CSK,CST6 (includes EG:1474),CTSL1,CTSL2,CTSS,CXCL2,CXCR3,CYBA,CYBB,CYLD,CYP19A1,DLL4…	269
Cellular Function and Maintenance	exocytosis	exocytosis	8.43E-06		0.796	APBA1,ARFGEF1,ARFGEF2,ATP2A2,B4GALT1,CACNA1A,CACNB2,CADPS,CADPS2,CCL5,CD244,CDK5,CHP,CPLX3,CSF2,EXOC2,EXOC3L1,EXOC7,EXOC8,EXPH5,F2R,F2RL1,FCER1A,FCGR3A,FCGRT,GNAI2,GNAI3,HGS,HTT,IL4 (includes EG:16189),IRAK1,ITSN1,KIT,KITLG,LNPEP,LOC643751,LPHN1,MIA3,MYD88,MYH10,MYO5A,NAPB,NCS1,NOS3,NSF,OTOF,P2RX7,PIP5K1C,PLCB3,PLCG1,PPP3CA,PRKCA,RAB26,RAB27B,RAB2B,RAB3A,RAB3B,RAB3D,RAB5A,RAB9A,RALA,RAPGEF4,RIMS3…	101
Molecular Transport	exocytosis	exocytosis	8.43E-06		0.796	APBA1,ARFGEF1,ARFGEF2,ATP2A2,B4GALT1,CACNA1A,CACNB2,CADPS,CADPS2,CCL5,CD244,CDK5,CHP,CPLX3,CSF2,EXOC2,EXOC3L1,EXOC7,EXOC8,EXPH5,F2R,F2RL1,FCER1A,FCGR3A,FCGRT,GNAI2,GNAI3,HGS,HTT,IL4 (includes EG:16189),IRAK1,ITSN1,KIT,KITLG,LNPEP,LOC643751,LPHN1,MIA3,MYD88,MYH10,MYO5A,NAPB,NCS1,NOS3,NSF,OTOF,P2RX7,PIP5K1C,PLCB3,PLCG1,PPP3CA,PRKCA,RAB26,RAB27B,RAB2B,RAB3A,RAB3B,RAB3D,RAB5A,RAB9A,RALA,RAPGEF4,RIMS3…	101
Tissue Development	development	development of epithelial tissue	8.48E-06		-0.058	ABCA3,ADAM15,ADAMTS1,ADAMTS8,ADM,ADRA2B,AGGF1,AIMP1,ANG,ANGPT2,ANGPTL1,ANGPTL4,ANPEP,APOA1,APOE,APOH,ARG1,ARHGAP24,ATP5A1,ATPIF1,AXL,B4GALT1,BMP2,BMP4,BMP6,BMP7,BMPR2,C3,CA2,CA9,CALR,CASP9 (includes EG:100140945),CAV1,CAV2,CCM2,CD36,CD3E,CDH1,CDH13,CDH2,CHUK,COL18A1,COL4A1,COL4A2,COL4A3,COMP,CRYGS,CSF1 (includes EG:12977),CSF1R,CTNNB1,CXCL2,CXCR4,CYBA,DAG1,DIRAS3,DLL4,DLX3,DLX5,E2F4,ECE1,ECM1 (in…	204
Cellular Growth and Proliferation	proliferation	proliferation of lung cancer cell lines	8.56E-06		0.202	ADAM17,AKT2,AKT3 (includes EG:10000),AXL,BAD,BAK1,BOP1/LOC727967,C1QBP,CAMP,CASP2,CDK2,CDK4,CDKN1A,CHEK1,CSF2,CYP2J2,CYR61,DNAJB4,E2F1,EGFR,EIF4E,EPHA2,ERBB3,ERCC1,ESR2,FANCC,FGF2,FGF7,FHIT,FNTA,FOSL1,GMNN,GOLPH3,H2AFY,HGF,HNRNPA2B1,ID1,IGF2,IL18 (includes EG:16173),ITPR1,KITLG,LCN2,MAP3K7 (includes EG:172842),MAPK14,MAPK8,MAPK9,MET,MIA,MTOR,MYC,MYH14,NCOA3,NEIL1,NR4A1,OSGIN1,PCBP4,PDGFC,PDGFRA,P…	87
Small Molecule Biochemistry	metabolism	metabolism of nucleoside triphosphate	8.66E-06	Decreased	-2.027	ABCC1,ABCG5,ACLY,ACTC1,ADK,AK2,AK3,ALDOA,APP,ATP1A1,ATP1A2,ATP5A1,ATP5B,ATP5C1,ATP5D,ATP5F1,ATP5G1,ATP5H,ATP5J,ATP5L,ATP5O,ATP6V1E1,ATP6V1E2,ATP6V1G2,ATP7A,BAD,BLM,CDK1,CHD1L,CTNS,CTPS,DCTPP1,DDX25,DNA2,DTYMK,EIF2AK3,ENPP1,ENPP3,ENTPD1,ERCC3,GUK1,HIF1A,HTT,IDE,IMPDH1,INO80 (includes EG:296084),INSR,KATNA1,LETM1,LONP1,MSH2,MSH6,MYH7,MYO9B,NDUFAF1,NDUFS1,NR2C2,NRAS,NSF,NT5C2,NUDT1,NUDT15,OPA1,PARK2…	94
Nucleic Acid Metabolism	metabolism	metabolism of nucleoside triphosphate	8.66E-06	Decreased	-2.027	ABCC1,ABCG5,ACLY,ACTC1,ADK,AK2,AK3,ALDOA,APP,ATP1A1,ATP1A2,ATP5A1,ATP5B,ATP5C1,ATP5D,ATP5F1,ATP5G1,ATP5H,ATP5J,ATP5L,ATP5O,ATP6V1E1,ATP6V1E2,ATP6V1G2,ATP7A,BAD,BLM,CDK1,CHD1L,CTNS,CTPS,DCTPP1,DDX25,DNA2,DTYMK,EIF2AK3,ENPP1,ENPP3,ENTPD1,ERCC3,GUK1,HIF1A,HTT,IDE,IMPDH1,INO80 (includes EG:296084),INSR,KATNA1,LETM1,LONP1,MSH2,MSH6,MYH7,MYO9B,NDUFAF1,NDUFS1,NR2C2,NRAS,NSF,NT5C2,NUDT1,NUDT15,OPA1,PARK2…	94
Cellular Growth and Proliferation	proliferation	proliferation of hematopoietic progenitor cells	8.86E-06		1.382	BCL2L1,BLM,BLNK,BMP4,BTK,CALCB,CBFB,CBL,CCL20,CD3E,CD40,CDK2,CDKN1B,CSF1R,CSF2,CTNNB1,DLL4,DNAJA3,DRD3,EFNB1,EGFR,EGR1,EGR3,EPO,EPOR,ETS2,FAS,FLI1,FLT3LG,FYB,FYN,GATA2,GFI1B,GNRH1,HIPK2,HOXA5,HOXB3,HOXB4,HOXB7,IFNA16,IL15 (includes EG:16168),IL1A,IL1B,IL2RG,IL4 (includes EG:16189),IL4R,IL6,IL7,IL7R,ITGA1,ITK,JAG2,JAK2,JUNB,KIT,KITLG,LCP2,LEF1,LOX,LPIN1,MAD1L1,MAFG,MAP2K4,MAPK14,MAPK3,MECOM,MEIS1,…	111
Cellular Development	proliferation	proliferation of hematopoietic progenitor cells	8.86E-06		1.382	BCL2L1,BLM,BLNK,BMP4,BTK,CALCB,CBFB,CBL,CCL20,CD3E,CD40,CDK2,CDKN1B,CSF1R,CSF2,CTNNB1,DLL4,DNAJA3,DRD3,EFNB1,EGFR,EGR1,EGR3,EPO,EPOR,ETS2,FAS,FLI1,FLT3LG,FYB,FYN,GATA2,GFI1B,GNRH1,HIPK2,HOXA5,HOXB3,HOXB4,HOXB7,IFNA16,IL15 (includes EG:16168),IL1A,IL1B,IL2RG,IL4 (includes EG:16189),IL4R,IL6,IL7,IL7R,ITGA1,ITK,JAG2,JAK2,JUNB,KIT,KITLG,LCP2,LEF1,LOX,LPIN1,MAD1L1,MAFG,MAP2K4,MAPK14,MAPK3,MECOM,MEIS1,…	111
Hematological System Development and Function	proliferation	proliferation of hematopoietic progenitor cells	8.86E-06		1.382	BCL2L1,BLM,BLNK,BMP4,BTK,CALCB,CBFB,CBL,CCL20,CD3E,CD40,CDK2,CDKN1B,CSF1R,CSF2,CTNNB1,DLL4,DNAJA3,DRD3,EFNB1,EGFR,EGR1,EGR3,EPO,EPOR,ETS2,FAS,FLI1,FLT3LG,FYB,FYN,GATA2,GFI1B,GNRH1,HIPK2,HOXA5,HOXB3,HOXB4,HOXB7,IFNA16,IL15 (includes EG:16168),IL1A,IL1B,IL2RG,IL4 (includes EG:16189),IL4R,IL6,IL7,IL7R,ITGA1,ITK,JAG2,JAK2,JUNB,KIT,KITLG,LCP2,LEF1,LOX,LPIN1,MAD1L1,MAFG,MAP2K4,MAPK14,MAPK3,MECOM,MEIS1,…	111
Hematopoiesis	proliferation	proliferation of hematopoietic progenitor cells	8.86E-06		1.382	BCL2L1,BLM,BLNK,BMP4,BTK,CALCB,CBFB,CBL,CCL20,CD3E,CD40,CDK2,CDKN1B,CSF1R,CSF2,CTNNB1,DLL4,DNAJA3,DRD3,EFNB1,EGFR,EGR1,EGR3,EPO,EPOR,ETS2,FAS,FLI1,FLT3LG,FYB,FYN,GATA2,GFI1B,GNRH1,HIPK2,HOXA5,HOXB3,HOXB4,HOXB7,IFNA16,IL15 (includes EG:16168),IL1A,IL1B,IL2RG,IL4 (includes EG:16189),IL4R,IL6,IL7,IL7R,ITGA1,ITK,JAG2,JAK2,JUNB,KIT,KITLG,LCP2,LEF1,LOX,LPIN1,MAD1L1,MAFG,MAP2K4,MAPK14,MAPK3,MECOM,MEIS1,…	111
Cellular Growth and Proliferation	proliferation	proliferation of hematopoietic cells	8.87E-06		1.392	ABL1,BCL2L1,BCR,BLM,BLNK,BMP4,BTK,CALCB,CBFB,CBL,CCL20,CD3E,CD40,CDK2,CDKN1B,CDKN1C,CSF1R,CSF2,CTNNB1,DHH,DLL4,DNAJA3,DRD3,EFNB1,EGFR,EGR1,EGR3,EPO,EPOR,ETS2,FAS,FLI1,FLT3LG,FYB,FYN,GATA2,GFI1B,GNRH1,HIPK2,HOXA5,HOXB3,HOXB4,HOXB7,IFNA16,IL15 (includes EG:16168),IL1A,IL1B,IL2RG,IL4 (includes EG:16189),IL4R,IL6,IL7,IL7R,ITGA1,ITK,JAG2,JAK2,JUNB,KIT,KITLG,LCP2,LEF1,LOX,LPIN1,MAD1L1,MAFG,MAP2K4,MAPK1…	116
Cellular Development	proliferation	proliferation of hematopoietic cells	8.87E-06		1.392	ABL1,BCL2L1,BCR,BLM,BLNK,BMP4,BTK,CALCB,CBFB,CBL,CCL20,CD3E,CD40,CDK2,CDKN1B,CDKN1C,CSF1R,CSF2,CTNNB1,DHH,DLL4,DNAJA3,DRD3,EFNB1,EGFR,EGR1,EGR3,EPO,EPOR,ETS2,FAS,FLI1,FLT3LG,FYB,FYN,GATA2,GFI1B,GNRH1,HIPK2,HOXA5,HOXB3,HOXB4,HOXB7,IFNA16,IL15 (includes EG:16168),IL1A,IL1B,IL2RG,IL4 (includes EG:16189),IL4R,IL6,IL7,IL7R,ITGA1,ITK,JAG2,JAK2,JUNB,KIT,KITLG,LCP2,LEF1,LOX,LPIN1,MAD1L1,MAFG,MAP2K4,MAPK1…	116
Hematological System Development and Function	proliferation	proliferation of hematopoietic cells	8.87E-06		1.392	ABL1,BCL2L1,BCR,BLM,BLNK,BMP4,BTK,CALCB,CBFB,CBL,CCL20,CD3E,CD40,CDK2,CDKN1B,CDKN1C,CSF1R,CSF2,CTNNB1,DHH,DLL4,DNAJA3,DRD3,EFNB1,EGFR,EGR1,EGR3,EPO,EPOR,ETS2,FAS,FLI1,FLT3LG,FYB,FYN,GATA2,GFI1B,GNRH1,HIPK2,HOXA5,HOXB3,HOXB4,HOXB7,IFNA16,IL15 (includes EG:16168),IL1A,IL1B,IL2RG,IL4 (includes EG:16189),IL4R,IL6,IL7,IL7R,ITGA1,ITK,JAG2,JAK2,JUNB,KIT,KITLG,LCP2,LEF1,LOX,LPIN1,MAD1L1,MAFG,MAP2K4,MAPK1…	116
Hematopoiesis	proliferation	proliferation of hematopoietic cells	8.87E-06		1.392	ABL1,BCL2L1,BCR,BLM,BLNK,BMP4,BTK,CALCB,CBFB,CBL,CCL20,CD3E,CD40,CDK2,CDKN1B,CDKN1C,CSF1R,CSF2,CTNNB1,DHH,DLL4,DNAJA3,DRD3,EFNB1,EGFR,EGR1,EGR3,EPO,EPOR,ETS2,FAS,FLI1,FLT3LG,FYB,FYN,GATA2,GFI1B,GNRH1,HIPK2,HOXA5,HOXB3,HOXB4,HOXB7,IFNA16,IL15 (includes EG:16168),IL1A,IL1B,IL2RG,IL4 (includes EG:16189),IL4R,IL6,IL7,IL7R,ITGA1,ITK,JAG2,JAK2,JUNB,KIT,KITLG,LCP2,LEF1,LOX,LPIN1,MAD1L1,MAFG,MAP2K4,MAPK1…	116
Molecular Transport	export	export of RNA	9.12E-06	Decreased	-2.012	AGFG1,ALB,DDX19B,DDX25,DDX39A,DDX39B,EIF4E,EIF5A,FYTTD1,GLE1 (includes EG:2733),HHEX,KHDRBS1,NCBP1,NUDT4,NUP107,NUP133 (includes EG:234865),NUP160,NUP214,NUP98,NXF1,NXT1,PHAX,RAE1,SMG1,SMG5,SMG6,SMG7,THOC1,THOC2,THOC4,THOC5,THOC6,UPF1,UPF2,XPO1,XPO5,XPOT	37
RNA Trafficking	export	export of RNA	9.12E-06	Decreased	-2.012	AGFG1,ALB,DDX19B,DDX25,DDX39A,DDX39B,EIF4E,EIF5A,FYTTD1,GLE1 (includes EG:2733),HHEX,KHDRBS1,NCBP1,NUDT4,NUP107,NUP133 (includes EG:234865),NUP160,NUP214,NUP98,NXF1,NXT1,PHAX,RAE1,SMG1,SMG5,SMG6,SMG7,THOC1,THOC2,THOC4,THOC5,THOC6,UPF1,UPF2,XPO1,XPO5,XPOT	37
Cardiovascular Disease	vascular disease	vascular disease	9.34E-06		0.271	A2ML1,ABCA1,ABCB11,ABCB5,ABCC8,ABCF2,ABI2,ABL1,ACAT1,ACAT2,ACBD3,ACCN2,ACCN3,ACOX1,ACSBG1,ACSL1,ACTN2,ACTN3,ADAM19,ADAM32,ADAM9,ADAMTS12,ADAMTS16,ADAMTS2,ADAMTS3,ADD1,ADD2,ADK,ADM,ADORA2A,ADRA1B,ADRA1D,ADRA2A,ADRA2B,ADRB1,ADRB2,AGER,AGPAT5,AGPAT6,AGPHD1,AGT,AHCYL2,AHR,AK5,AKAP6,AKT3 (includes EG:10000),ALDH18A1,ALDH1A1,ALDH5A1,ALDH6A1,ALK,ALOX12,ALOX15,ALOX5,ALOX5AP,ALPK1,AMICA1,AMN1 (includes EG…	977
Cell Cycle	G2 phase	arrest in G2 phase	9.37E-06			ABL1,AR,ATF2,ATF5,ATM,ATR,AURKA,BIRC5,BLM,BRCA1,BRSK2,CCNA2,CCND1,CDC25B,CDC25C,CDH13,CDK1,CDKN1A,CHEK1,CHEK2,CKS1B,CREM,CSE1L,CSNK2A1,CTNNB1,DPP4,EGFR,EIF2AK2,ERCC1,FADD,FANCC,FASN,FHIT,FLNA,FOXM1,GADD45A,GADD45B,GPC1,H2AFX,HDAC1,IGF2,IGFBP5,IL1A,IL24,IL6,JUN,KDM5B,LATS1,LATS2,LGALS1,MAP2K1,MAP2K6,MAP2K7,MAPK14,MAPK8,MASTL,MBD4,MET,MIA,MLH1,MSH2,MYBL2,MYC,PARP1,PCBP4,PLAU,PLK1,PMS2,POLB,PPAP2C,P…	92
Hematological System Development and Function	quantity	quantity of lymphocytes	1.03E-05	Increased	2.072	ABCG2,AFF1,AGT,AHR,ANK2,APOA1,APOE,APP,ATM,BAD,BCL10,BCL2A1,BCL2L1,BIRC5,BLM,BLNK,BMI1,BST1 (includes EG:12182),BTK,C3,CAMP,CARD11,CARM1,CASP8,CBFB,CCL5,CCR6,CCR7,CD180,CD244,CD247,CD27,CD274,CD3D,CD3E,CD3G,CD4,CD40,CD47,CD72,CD80 (includes EG:12519),CD83,CD86,CDKN1A,CDKN1B,CFLAR,CHRNA1,CHST3,CHST4,CHUK,CIITA,CISH,CORT,CREB1,CREBBP,CRIP3,CSF1 (includes EG:12977),CSF2,CSF2RB,CTSL2,CTSS,CXCR3,CXCR4…	288
Tissue Morphology	quantity	quantity of lymphocytes	1.03E-05	Increased	2.072	ABCG2,AFF1,AGT,AHR,ANK2,APOA1,APOE,APP,ATM,BAD,BCL10,BCL2A1,BCL2L1,BIRC5,BLM,BLNK,BMI1,BST1 (includes EG:12182),BTK,C3,CAMP,CARD11,CARM1,CASP8,CBFB,CCL5,CCR6,CCR7,CD180,CD244,CD247,CD27,CD274,CD3D,CD3E,CD3G,CD4,CD40,CD47,CD72,CD80 (includes EG:12519),CD83,CD86,CDKN1A,CDKN1B,CFLAR,CHRNA1,CHST3,CHST4,CHUK,CIITA,CISH,CORT,CREB1,CREBBP,CRIP3,CSF1 (includes EG:12977),CSF2,CSF2RB,CTSL2,CTSS,CXCR3,CXCR4…	288
Cellular Function and Maintenance	secretory pathway	secretory pathway	1.04E-05		0.796	APBA1,ARFGEF1,ARFGEF2,ATP2A2,B4GALT1,CACNA1A,CACNB2,CADPS,CADPS2,CCL5,CD244,CDK5,CHP,CPLX3,CSF2,EXOC2,EXOC3L1,EXOC7,EXOC8,EXPH5,F2R,F2RL1,FCER1A,FCGR3A,FCGRT,GNAI2,GNAI3,HGS,HTT,IL4 (includes EG:16189),IRAK1,ITSN1,KIT,KITLG,LNPEP,LOC643751,LPHN1,MIA3,MYD88,MYH10,MYO5A,NAPB,NCS1,NOS3,NSF,OTOF,P2RX7,PIP5K1C,PLCB3,PLCG1,PPP3CA,PRKCA,RAB26,RAB27B,RAB2B,RAB3A,RAB3B,RAB3D,RAB5A,RAB9A,RALA,RAPGEF4,RIMS3…	102
Molecular Transport	secretory pathway	secretory pathway	1.04E-05		0.796	APBA1,ARFGEF1,ARFGEF2,ATP2A2,B4GALT1,CACNA1A,CACNB2,CADPS,CADPS2,CCL5,CD244,CDK5,CHP,CPLX3,CSF2,EXOC2,EXOC3L1,EXOC7,EXOC8,EXPH5,F2R,F2RL1,FCER1A,FCGR3A,FCGRT,GNAI2,GNAI3,HGS,HTT,IL4 (includes EG:16189),IRAK1,ITSN1,KIT,KITLG,LNPEP,LOC643751,LPHN1,MIA3,MYD88,MYH10,MYO5A,NAPB,NCS1,NOS3,NSF,OTOF,P2RX7,PIP5K1C,PLCB3,PLCG1,PPP3CA,PRKCA,RAB26,RAB27B,RAB2B,RAB3A,RAB3B,RAB3D,RAB5A,RAB9A,RALA,RAPGEF4,RIMS3…	102
Cellular Growth and Proliferation	proliferation	proliferation of fibroblast cell lines	1.08E-05		-0.599	A2M,ACAT1,ADRA1B,ADRA1D,AGER,AHR,AKR1B1,ALK,ARHGAP32,ATIC,AXIN1,BACH2,BLM,BMI1,BMP2,BOP1/LOC727967,BRF1 (includes EG:2972),BTG1,BTG2,BTG3,BTRC,C5orf13,CAPRIN1,CAT,CAV1,CCND1,CCNE1,CD9,CDC73 (includes EG:214498),CDKN1A,CDKN1B,CDKN2B,CIRBP,CKS1B,CLTC,COPS2,CREB1,CRK,CSF1 (includes EG:12977),CSF1R,CTNNB1,CTSD,CUL7,CXCR7,CYGB,DACH1,DICER1,E2F1,E2F2,E2F3,E4F1,EBNA1BP2,EIF2AK1,ERCC6,ERO1L,ETV6,F2RL1,FG…	157
Connective Tissue Development and Function	proliferation	proliferation of fibroblast cell lines	1.08E-05		-0.599	A2M,ACAT1,ADRA1B,ADRA1D,AGER,AHR,AKR1B1,ALK,ARHGAP32,ATIC,AXIN1,BACH2,BLM,BMI1,BMP2,BOP1/LOC727967,BRF1 (includes EG:2972),BTG1,BTG2,BTG3,BTRC,C5orf13,CAPRIN1,CAT,CAV1,CCND1,CCNE1,CD9,CDC73 (includes EG:214498),CDKN1A,CDKN1B,CDKN2B,CIRBP,CKS1B,CLTC,COPS2,CREB1,CRK,CSF1 (includes EG:12977),CSF1R,CTNNB1,CTSD,CUL7,CXCR7,CYGB,DACH1,DICER1,E2F1,E2F2,E2F3,E4F1,EBNA1BP2,EIF2AK1,ERCC6,ERO1L,ETV6,F2RL1,FG…	157
Tissue Development	development	development of muscle	1.14E-05		-0.556	ACHE,ACTC1,AFG3L2,ANKRD1,APC,AR,ARHGEF25,BDNF,BMP2,BMP4,BOC,CACNA1H,CACNA2D2,CACNB4,CAPN2,CAPN3,CASP3,CAV1,CAV3,CCNA2,CDK5,CDKN1A,CDKN1C,CDON,CENPF,CHKB,CHRNB1,CIITA,COL11A1,CRYAB,CSRP3,CTBP1,CTBP2,CTF1,CTNNB1,CXADR,DEF6,DES,DOCK1,DOCK5,DTNBP1,DUSP1,DYRK1B,EDN1,EGR3,ELAVL1,ELN,EMD,ENG,ETV1,EVC,F2,F2RL1,FGF2,FGFR1,FGFR2,FGFRL1,FHL2,FHL3,FILIP1L,FKBP1A,FKTN,FLNB,FOXC2,FOXF1,FOXO1 (includes EG:2308)…	222
Skeletal and Muscular System Development and Function	development	development of muscle	1.14E-05		-0.556	ACHE,ACTC1,AFG3L2,ANKRD1,APC,AR,ARHGEF25,BDNF,BMP2,BMP4,BOC,CACNA1H,CACNA2D2,CACNB4,CAPN2,CAPN3,CASP3,CAV1,CAV3,CCNA2,CDK5,CDKN1A,CDKN1C,CDON,CENPF,CHKB,CHRNB1,CIITA,COL11A1,CRYAB,CSRP3,CTBP1,CTBP2,CTF1,CTNNB1,CXADR,DEF6,DES,DOCK1,DOCK5,DTNBP1,DUSP1,DYRK1B,EDN1,EGR3,ELAVL1,ELN,EMD,ENG,ETV1,EVC,F2,F2RL1,FGF2,FGFR1,FGFR2,FGFRL1,FHL2,FHL3,FILIP1L,FKBP1A,FKTN,FLNB,FOXC2,FOXF1,FOXO1 (includes EG:2308)…	222
Cellular Growth and Proliferation	proliferation	proliferation of cancer cells	1.16E-05		0.671	BAMBI,BECN1,CASP3,CAV1,CD40,CSF2,CST3,CTSB,CTSS,DCN,DOCK4,EIF4EBP1,FGF2,FGFR1,FOS,HGF,HMMR,ID1,ID2,ID3 (includes EG:15903),IGF1R,IGF2,IL15 (includes EG:16168),IL4 (includes EG:16189),IL6,IL7,ITGA1,JAG1,KCTD11,KDR,KITLG,KRAS,LPAR2,LTA,LZTS2,MAPK14,MMP9,MST1R,MTOR,MYC,NRP1 (includes EG:18186),PARP1,PLAGL1,PLAUR,PLK1,POU3F2,PRKCD,PTEN,RAD17 (includes EG:19356),RHOB,RORC,SDC2,SFRP1,SRC,TAX1BP3,TGFB2,…	64
Tumor Morphology	proliferation	proliferation of cancer cells	1.16E-05		0.671	BAMBI,BECN1,CASP3,CAV1,CD40,CSF2,CST3,CTSB,CTSS,DCN,DOCK4,EIF4EBP1,FGF2,FGFR1,FOS,HGF,HMMR,ID1,ID2,ID3 (includes EG:15903),IGF1R,IGF2,IL15 (includes EG:16168),IL4 (includes EG:16189),IL6,IL7,ITGA1,JAG1,KCTD11,KDR,KITLG,KRAS,LPAR2,LTA,LZTS2,MAPK14,MMP9,MST1R,MTOR,MYC,NRP1 (includes EG:18186),PARP1,PLAGL1,PLAUR,PLK1,POU3F2,PRKCD,PTEN,RAD17 (includes EG:19356),RHOB,RORC,SDC2,SFRP1,SRC,TAX1BP3,TGFB2,…	64
Tissue Development	cardiogenesis	cardiogenesis	1.17E-05		-1.153	ACADM,ACTC1,ACVR1,ACVR2B,ADAM19,ADM,ADRA1B,ADRBK1,ANKRD1,ATF7,ATM,BAZ1B,BDNF,BMP2,BMP4,BMP7,BMPR1A,CALCRL,CASP3,CASP7,CASP8,CASQ2,CCM2,CCND1,CCND2,CCND3,CFLAR,CHD7,CITED2,COL11A1,COL3A1,COL4A3BP,CRK,CSRP3,CTBP1,CTBP2,CTNNB1,CXADR,CXCR4,CYP51A1,CYR61,DSP,DVL3,ECE1,ECE2,EDN1,EDNRA,EGFR,ENG,EPHB4,EPOR,ERBB3,FADD,FBN1,FGF8,FGFR2,FGFRL1,FKBP1A,FOXC2,FOXF1,FOXO1 (includes EG:2308),FOXP1,FOXP4,FRS2,FURI…	198
Cardiovascular System Development and Function	cardiogenesis	cardiogenesis	1.17E-05		-1.153	ACADM,ACTC1,ACVR1,ACVR2B,ADAM19,ADM,ADRA1B,ADRBK1,ANKRD1,ATF7,ATM,BAZ1B,BDNF,BMP2,BMP4,BMP7,BMPR1A,CALCRL,CASP3,CASP7,CASP8,CASQ2,CCM2,CCND1,CCND2,CCND3,CFLAR,CHD7,CITED2,COL11A1,COL3A1,COL4A3BP,CRK,CSRP3,CTBP1,CTBP2,CTNNB1,CXADR,CXCR4,CYP51A1,CYR61,DSP,DVL3,ECE1,ECE2,EDN1,EDNRA,EGFR,ENG,EPHB4,EPOR,ERBB3,FADD,FBN1,FGF8,FGFR2,FGFRL1,FKBP1A,FOXC2,FOXF1,FOXO1 (includes EG:2308),FOXP1,FOXP4,FRS2,FURI…	198
Organismal Development	cardiogenesis	cardiogenesis	1.17E-05		-1.153	ACADM,ACTC1,ACVR1,ACVR2B,ADAM19,ADM,ADRA1B,ADRBK1,ANKRD1,ATF7,ATM,BAZ1B,BDNF,BMP2,BMP4,BMP7,BMPR1A,CALCRL,CASP3,CASP7,CASP8,CASQ2,CCM2,CCND1,CCND2,CCND3,CFLAR,CHD7,CITED2,COL11A1,COL3A1,COL4A3BP,CRK,CSRP3,CTBP1,CTBP2,CTNNB1,CXADR,CXCR4,CYP51A1,CYR61,DSP,DVL3,ECE1,ECE2,EDN1,EDNRA,EGFR,ENG,EPHB4,EPOR,ERBB3,FADD,FBN1,FGF8,FGFR2,FGFRL1,FKBP1A,FOXC2,FOXF1,FOXO1 (includes EG:2308),FOXP1,FOXP4,FRS2,FURI…	198
Embryonic Development	cardiogenesis	cardiogenesis	1.17E-05		-1.153	ACADM,ACTC1,ACVR1,ACVR2B,ADAM19,ADM,ADRA1B,ADRBK1,ANKRD1,ATF7,ATM,BAZ1B,BDNF,BMP2,BMP4,BMP7,BMPR1A,CALCRL,CASP3,CASP7,CASP8,CASQ2,CCM2,CCND1,CCND2,CCND3,CFLAR,CHD7,CITED2,COL11A1,COL3A1,COL4A3BP,CRK,CSRP3,CTBP1,CTBP2,CTNNB1,CXADR,CXCR4,CYP51A1,CYR61,DSP,DVL3,ECE1,ECE2,EDN1,EDNRA,EGFR,ENG,EPHB4,EPOR,ERBB3,FADD,FBN1,FGF8,FGFR2,FGFRL1,FKBP1A,FOXC2,FOXF1,FOXO1 (includes EG:2308),FOXP1,FOXP4,FRS2,FURI…	198
Organ Development	cardiogenesis	cardiogenesis	1.17E-05		-1.153	ACADM,ACTC1,ACVR1,ACVR2B,ADAM19,ADM,ADRA1B,ADRBK1,ANKRD1,ATF7,ATM,BAZ1B,BDNF,BMP2,BMP4,BMP7,BMPR1A,CALCRL,CASP3,CASP7,CASP8,CASQ2,CCM2,CCND1,CCND2,CCND3,CFLAR,CHD7,CITED2,COL11A1,COL3A1,COL4A3BP,CRK,CSRP3,CTBP1,CTBP2,CTNNB1,CXADR,CXCR4,CYP51A1,CYR61,DSP,DVL3,ECE1,ECE2,EDN1,EDNRA,EGFR,ENG,EPHB4,EPOR,ERBB3,FADD,FBN1,FGF8,FGFR2,FGFRL1,FKBP1A,FOXC2,FOXF1,FOXO1 (includes EG:2308),FOXP1,FOXP4,FRS2,FURI…	198
Cell Death	cell death	cell death of neuroblastoma cell lines	1.17E-05		1.152	ABL1,ACHE,ADM,ADNP,AIFM1,AKT3 (includes EG:10000),ALS2,APOE,APP,AR,ATG5 (includes EG:11793),ATM,ATP13A2,ATP5A1,ATXN1,BAD,BAK1,BCHE,BCL2L1,BDNF,BIRC5,CASP3,CASP4,CASP9 (includes EG:100140945),CAST,CAT,CCT2,CCT3,CCT4,CCT5,CCT7,CCT8,CDKN1A,CDKN2D,CREB3L2,CTNNB1,CYCS,DDIT3,DIABLO,DNAJB1,DPP4,E2F1,EIF2AK2,EWSR1,FADD,FAS,FGF2,FKBP1A,GAL,GALR2,GDNF,GLRX,GNAO1,GPC1,GSK3B,HDAC1,HMGA1,HPCA,HSF1 (includes E…	115
Cellular Movement	migration	migration of smooth muscle cells	1.19E-05		1.259	ADM,AGER,AGT,APOE,BMP2,BMPR2,CALCRL,CCL5,CD47,CDKN1B,CLIC4,COMP,CSF2,CTSL2,CYP2J2,ELN,F2,F2R,FBLN5,FGF2,FGFR1,FOXO4,GIT1 (includes EG:216963),HBEGF,IGFBP2,IGFBP4,IGFBP5,IL18 (includes EG:16173),IL1A,IL1B,IL6,ITGB1,ITGB5,LDLR,LPAR1,LPAR2,LTA,MAPKAPK2,MMP9,MYC,NFE2L2,NGF,NOX1,NQO1,PDGFRB,PLAT,PLAU,PLAUR,POLDIP2,PROC,PTGER4,PTPRF,RAC1,RAMP2,RAMP3,S100A4,S1PR2,SDC4,SPP1 (includes EG:20750),TEK,THBS1,…	62
Skeletal and Muscular System Development and Function	migration	migration of smooth muscle cells	1.19E-05		1.259	ADM,AGER,AGT,APOE,BMP2,BMPR2,CALCRL,CCL5,CD47,CDKN1B,CLIC4,COMP,CSF2,CTSL2,CYP2J2,ELN,F2,F2R,FBLN5,FGF2,FGFR1,FOXO4,GIT1 (includes EG:216963),HBEGF,IGFBP2,IGFBP4,IGFBP5,IL18 (includes EG:16173),IL1A,IL1B,IL6,ITGB1,ITGB5,LDLR,LPAR1,LPAR2,LTA,MAPKAPK2,MMP9,MYC,NFE2L2,NGF,NOX1,NQO1,PDGFRB,PLAT,PLAU,PLAUR,POLDIP2,PROC,PTGER4,PTPRF,RAC1,RAMP2,RAMP3,S100A4,S1PR2,SDC4,SPP1 (includes EG:20750),TEK,THBS1,…	62
Cellular Compromise	stress response	stress response of cells	1.21E-05		0.757	AGER,AHR,ALDH3A2,ALOX12,APP,ATF4,ATP2A1,ATP2A2,ATXN3,BRCA1,CALR,CASP3,CAT,CDKN1A,DDIT3,EIF2A,EIF2AK3,EIF4EBP1,ERN1,GPX7,HFE,HMOX1,HSD17B10,HSF1 (includes EG:15499),HSP90B1,HSPA5,HSPB2,IL1B,IL24,INSR,MAP3K5,MAPK14,Mapt,MT1E,MT2A,MUC1,MYC,NAMPT,NFE2L1,NFE2L2,NGFR,NQO1,NRF1,PIK3IP1,PON2,PRDX1,RXRA,S100A12,TMBIM6,TNF,TP53 (includes EG:22059),UBE4B,VHL,XDH	54
Cellular Assembly and Organization	development	development of cellular protrusions	1.23E-05		1.345	ABI2,ABL2,ACHE,ACTB,ACTR3,ADORA2A,AFG3L2,AGER,AGRN,AHI1,AKAP5,ALS2,AMIGO1,APC,APOE,APP,ARHGEF25,ATL1,ATP7A,ATXN10,BACE1,BAIAP2,BASP1,BBS2,BBS4,BDNF,BMP7,BRAF,BRSK1,BRSK2,BTG2,CACNA1A,CACNA1F,CAMK1D,CAPZB,CAV1,CDC20,CDH2,CDK5,CDK5R1,CELSR2,CHN1,CHRNA1,CHRNB2,CIT,CLU,CNP,CNTNAP1,CREB1,CRHR1,CRMP1,CSNK2A2,CSPG4,CTNND1,CYP19A1,CYTH2,DBN1,DICER1,DLX5,DNAAF1,DNM1L,DOCK7,DPYSL2,DPYSL4,DRGX,DTNBP1,DVL1,D…	264
Cellular Function and Maintenance	autophagy	autophagy of cells	1.24E-05		1.979	AGER,AGT,APP,ATF4,ATG13 (includes EG:362164),ATG14 (includes EG:100504663),ATG16L1,ATG5 (includes EG:11793),BAIAP2,BECN1,BNIP3,BRCA1,CAMP,CAPN1,CAPNS1,CASP2,CAT,CATSPER4,CDKN1A,CDKN2D,CFLAR,CHEK1,CHRND,CHUK,CISD2,COX5A (includes EG:12858),DDIT4,EEF2K,EIF2AK2,EIF2AK3,EPHB2,ERN1,FADD,FAS,FBXL20,FOXO3,GAB1,GABARAPL1,GABARAPL2,GABBR2,GFAP,GJA4,GNAI3,GOPC,GPR18,GSK3B,GTF2IRD2,HDAC6,HIVEP2,HTT,IKBKB,IL…	98
Cell Morphology	autophagy	autophagy of cells	1.24E-05		1.979	AGER,AGT,APP,ATF4,ATG13 (includes EG:362164),ATG14 (includes EG:100504663),ATG16L1,ATG5 (includes EG:11793),BAIAP2,BECN1,BNIP3,BRCA1,CAMP,CAPN1,CAPNS1,CASP2,CAT,CATSPER4,CDKN1A,CDKN2D,CFLAR,CHEK1,CHRND,CHUK,CISD2,COX5A (includes EG:12858),DDIT4,EEF2K,EIF2AK2,EIF2AK3,EPHB2,ERN1,FADD,FAS,FBXL20,FOXO3,GAB1,GABARAPL1,GABARAPL2,GABBR2,GFAP,GJA4,GNAI3,GOPC,GPR18,GSK3B,GTF2IRD2,HDAC6,HIVEP2,HTT,IKBKB,IL…	98
Tissue Morphology	quantity	quantity of connective tissue cells	1.24E-05		-0.151	ABL1,ACVR2A,ADRB1,AHR,ANGPT2,AR,ATM,B4GALNT1,BCL2L2,BGN,CAPN1,CAPNS1,CDKN1A,CDKN1B,CHUK,CIDEA,COL4A3,CREBBP,CSF1 (includes EG:12977),CTGF,CTNNB1,CYP19A1,CYP27B1,DCN,DICER1,DNMT3B,EIF2AK3,EIF4EBP1,F2R,FGF18,FGF2,FGFR3,FLT3,FOS,FOSB,FOSL2,GDF9,GDNF,GGT1,GLP1R,GNAQ,GNRH1,HDAC2,HDC,HSD11B1,HSD11B2,HSPG2,IGFBP3,IL1A,IL1R1,IL1RN,IL23A,IL4 (includes EG:16189),IL6ST,INPP5D,INSR,ITGB1,ITGB3,JUNB,KL,KREMEN…	98
Connective Tissue Development and Function	quantity	quantity of connective tissue cells	1.24E-05		-0.151	ABL1,ACVR2A,ADRB1,AHR,ANGPT2,AR,ATM,B4GALNT1,BCL2L2,BGN,CAPN1,CAPNS1,CDKN1A,CDKN1B,CHUK,CIDEA,COL4A3,CREBBP,CSF1 (includes EG:12977),CTGF,CTNNB1,CYP19A1,CYP27B1,DCN,DICER1,DNMT3B,EIF2AK3,EIF4EBP1,F2R,FGF18,FGF2,FGFR3,FLT3,FOS,FOSB,FOSL2,GDF9,GDNF,GGT1,GLP1R,GNAQ,GNRH1,HDAC2,HDC,HSD11B1,HSD11B2,HSPG2,IGFBP3,IL1A,IL1R1,IL1RN,IL23A,IL4 (includes EG:16189),IL6ST,INPP5D,INSR,ITGB1,ITGB3,JUNB,KL,KREMEN…	98
Cell Death	cell death	cell death of lung cancer cell lines	1.24E-05		-0.122	ABCC1,ADAM17,AIFM1,AKT2,AKT3 (includes EG:10000),AP2A2,ARL11,AXIN1,BAK1,BCL2L1,BIRC3,BIRC5,BOK,CACNA2D2,CAMP,CASP2,CASP3,CASP8,CASP9 (includes EG:100140945),CDKN1A,CDKN1B,CDKN1C,CDKN2C,CFLAR,COL4A1,COL4A2,COX5A (includes EG:12858),CREB1,DAPK3,DDIT3,DUSP1,E2F1,EGFR,ELL,EPHA2,ERBB3,FAS,FGF2,FHIT,FOXO1 (includes EG:2308),FOXO3,G0S2,GADD45A,GADD45B,GLIPR1,HIPK2,HMGA1,HSF1 (includes EG:15499),HTATIP2,…	123
Cellular Growth and Proliferation	growth	growth of breast cancer cell lines	1.27E-05		0.227	AKT2,AMH,AR,ARRDC3,BAD,BCAR1,BCCIP,BCL2L1,BIRC5,BMX,BRCA1,BTG2,C9orf86,CA9,CASP3,CAT,CAV1,CCND1,CDC25B,CDH1,CDKN1B,CEBPD,CSE1L,CTGF,CTNNB1,CTSD,CXCR4,CXCR7,CYP19A1,CYR61,DAB2,DCN,DDB2,EGFR,ELF3,EPHA2,FBLN5,FGF1,FGF2,FGF8,FGFR4,FSTL3,GDF15,GHRHR,GJA1,GPC1,GPER,GRB2,GRB7,HBEGF,HBP1,HDAC5,HGF,HMGA1,HNRNPK,HOXB7,IER3,IGF1R,IGF2,IGFBP3,IGFBP5,IL1B,IL24,IL6,INHBA,INSR,IRS1,ITGB4,JAK2,JUN,KCNH1,KITLG,KR…	139
Cellular Development	growth	growth of breast cancer cell lines	1.27E-05		0.227	AKT2,AMH,AR,ARRDC3,BAD,BCAR1,BCCIP,BCL2L1,BIRC5,BMX,BRCA1,BTG2,C9orf86,CA9,CASP3,CAT,CAV1,CCND1,CDC25B,CDH1,CDKN1B,CEBPD,CSE1L,CTGF,CTNNB1,CTSD,CXCR4,CXCR7,CYP19A1,CYR61,DAB2,DCN,DDB2,EGFR,ELF3,EPHA2,FBLN5,FGF1,FGF2,FGF8,FGFR4,FSTL3,GDF15,GHRHR,GJA1,GPC1,GPER,GRB2,GRB7,HBEGF,HBP1,HDAC5,HGF,HMGA1,HNRNPK,HOXB7,IER3,IGF1R,IGF2,IGFBP3,IGFBP5,IL1B,IL24,IL6,INHBA,INSR,IRS1,ITGB4,JAK2,JUN,KCNH1,KITLG,KR…	139
Molecular Transport	transport	transport of RNA	1.27E-05		-1.613	AGFG1,ALB,CAMP,CKAP5,DDX19B,DDX25,DDX39A,DDX39B,EIF4E,EIF5A,FUS,FYTTD1,GLE1 (includes EG:2733),HHEX,HNRNPA2B1,KHDRBS1,NCBP1,NUDT4,NUP107,NUP133 (includes EG:234865),NUP160,NUP214,NUP98,NXF1,NXT1,PHAX,RAE1,SMG1,SMG5,SMG6,SMG7,THOC1,THOC2,THOC4,THOC5,THOC6,UPF1,UPF2,XPO1,XPO5,XPOT	41
RNA Trafficking	transport	transport of RNA	1.27E-05		-1.613	AGFG1,ALB,CAMP,CKAP5,DDX19B,DDX25,DDX39A,DDX39B,EIF4E,EIF5A,FUS,FYTTD1,GLE1 (includes EG:2733),HHEX,HNRNPA2B1,KHDRBS1,NCBP1,NUDT4,NUP107,NUP133 (includes EG:234865),NUP160,NUP214,NUP98,NXF1,NXT1,PHAX,RAE1,SMG1,SMG5,SMG6,SMG7,THOC1,THOC2,THOC4,THOC5,THOC6,UPF1,UPF2,XPO1,XPO5,XPOT	41
Genetic Disorder	psoriasis	psoriasis	1.28E-05		0.133	A2M,ABCC1,ACPP,ADAM10,ADAM17,ADAR,ADM,AGER,ALDH3A2,ALOX12B,ALOX15B,ANP32A,ANXA3,APOD,APOE,AQP3,ARG1,ARHGDIB,ARPC1A,ATOX1,ATP12A,ATP1B1,ATP2A2,ATP6V0D1,ATXN3,BLNK,C1QBP,C3,CALML5,CALR,CAMP,CASP4,CAV1,CBFB,CCL20,CCND1,CCND2,CCND3,CCNF,CCT5,CD36,CD4,CD47,CD63,CD80 (includes EG:12519),CD86,CDC25B,CDH1,CDK2,CDK5,CDK5R1,CDKN1C,CEBPD,CFL1,CFLAR,CHRNA7,CLCA2,CLEC3B,CMAH,CNN1 (includes EG:1264),COL1A2,CRA…	424
Dermatological Diseases and Conditions	psoriasis	psoriasis	1.28E-05		0.133	A2M,ABCC1,ACPP,ADAM10,ADAM17,ADAR,ADM,AGER,ALDH3A2,ALOX12B,ALOX15B,ANP32A,ANXA3,APOD,APOE,AQP3,ARG1,ARHGDIB,ARPC1A,ATOX1,ATP12A,ATP1B1,ATP2A2,ATP6V0D1,ATXN3,BLNK,C1QBP,C3,CALML5,CALR,CAMP,CASP4,CAV1,CBFB,CCL20,CCND1,CCND2,CCND3,CCNF,CCT5,CD36,CD4,CD47,CD63,CD80 (includes EG:12519),CD86,CDC25B,CDH1,CDK2,CDK5,CDK5R1,CDKN1C,CEBPD,CFL1,CFLAR,CHRNA7,CLCA2,CLEC3B,CMAH,CNN1 (includes EG:1264),COL1A2,CRA…	424
Molecular Transport	nuclear export	nuclear export of mRNA	1.42E-05		-1.253	AGFG1,DDX19B,DDX25,DDX39A,DDX39B,EIF4E,EIF5A,FYTTD1,GLE1 (includes EG:2733),HHEX,NCBP1,NUP107,NUP133 (includes EG:234865),NUP160,NUP214,NUP98,NXF1,NXT1,RAE1,SMG1,SMG5,SMG6,SMG7,THOC1,THOC2,THOC4,THOC5,THOC6,UPF1,UPF2,XPO1	31
RNA Trafficking	nuclear export	nuclear export of mRNA	1.42E-05		-1.253	AGFG1,DDX19B,DDX25,DDX39A,DDX39B,EIF4E,EIF5A,FYTTD1,GLE1 (includes EG:2733),HHEX,NCBP1,NUP107,NUP133 (includes EG:234865),NUP160,NUP214,NUP98,NXF1,NXT1,RAE1,SMG1,SMG5,SMG6,SMG7,THOC1,THOC2,THOC4,THOC5,THOC6,UPF1,UPF2,XPO1	31
Cell Death	cell death	cell death of tumor cells	1.43E-05		1.782	ABL1,AGAP2,AIMP1,AKT1S1,AKT2,ALB,ANGPTL1,ANPEP,APP,AR,ATF2,ATM,ATP7B,B4GALT5,BAD,BCL2L1,BCL2L2,BDNF,BIRC5,BOK,BRCA1,BUB1B,CASP2,CASP3,CASP8,CASP9 (includes EG:100140945),CAT,CCND3,CD40,CDC25B,CDC45,CDC6 (includes EG:23834),CDH1,CDK2,CDKN1A,CDKN1B,CFLAR,CLU,COL18A1,CSF1 (includes EG:12977),CSF2,CTSB,DAXX,DDIT3,DIABLO,DNMT3B,EGFR,EIF2AK3,EMP2,ENO1,EPO,ETS1,F2,FADD,FAS,FGFR1,FHIT,FLT1,FLT3,FLT3LG,FO…	148
Cellular Assembly and Organization	formation	formation of focal adhesions	1.61E-05		1.056	ACTN1,ACTN2,ACTN3,ARHGAP6,ARHGEF3,Cald1,CAV1,CCND1,CHCHD2,CIB1,COL18A1,CSF2,CTGF,CTNND1,EFNA5,FERMT2,FGF2,GNA12,GNA13,GNAI2,GNB1,GNG2,GNG5,GNG7,GRP,HGF,ITGB1BP1,JAG1,JUB,KDR,KRAS,MMP14,MMP2,NCK1,NET1 (includes EG:10276),PDPK1,POLDIP2,PRKCA,PRKCE,PRKCI,PTEN,PTK2B (includes EG:19229),PTPRA,PXN,RAC1,RAP1GAP,RHOA,RHOC,RHOD,ROCK1,ROCK2,RTKN,S1PR1,SDC4,SERPINC1,SMAD3,SORBS1,SPRY2,TAOK2,TESK1,TESK2,THBS…	65
Tissue Development	formation	formation of focal adhesions	1.61E-05		1.056	ACTN1,ACTN2,ACTN3,ARHGAP6,ARHGEF3,Cald1,CAV1,CCND1,CHCHD2,CIB1,COL18A1,CSF2,CTGF,CTNND1,EFNA5,FERMT2,FGF2,GNA12,GNA13,GNAI2,GNB1,GNG2,GNG5,GNG7,GRP,HGF,ITGB1BP1,JAG1,JUB,KDR,KRAS,MMP14,MMP2,NCK1,NET1 (includes EG:10276),PDPK1,POLDIP2,PRKCA,PRKCE,PRKCI,PTEN,PTK2B (includes EG:19229),PTPRA,PXN,RAC1,RAP1GAP,RHOA,RHOC,RHOD,ROCK1,ROCK2,RTKN,S1PR1,SDC4,SERPINC1,SMAD3,SORBS1,SPRY2,TAOK2,TESK1,TESK2,THBS…	65
Cell-To-Cell Signaling and Interaction	formation	formation of focal adhesions	1.61E-05		1.056	ACTN1,ACTN2,ACTN3,ARHGAP6,ARHGEF3,Cald1,CAV1,CCND1,CHCHD2,CIB1,COL18A1,CSF2,CTGF,CTNND1,EFNA5,FERMT2,FGF2,GNA12,GNA13,GNAI2,GNB1,GNG2,GNG5,GNG7,GRP,HGF,ITGB1BP1,JAG1,JUB,KDR,KRAS,MMP14,MMP2,NCK1,NET1 (includes EG:10276),PDPK1,POLDIP2,PRKCA,PRKCE,PRKCI,PTEN,PTK2B (includes EG:19229),PTPRA,PXN,RAC1,RAP1GAP,RHOA,RHOC,RHOD,ROCK1,ROCK2,RTKN,S1PR1,SDC4,SERPINC1,SMAD3,SORBS1,SPRY2,TAOK2,TESK1,TESK2,THBS…	65
Hematological Disease	thrombosis	thrombosis	1.61E-05		0.735	ADRB2,AHR,AKT3 (includes EG:10000),ALOX12,ANGPT1,ANGPT2,ANTXR1,ANXA5,APOE,APOH,APP,AXL,BMPR2,C1QA,C2,CAPN1,CFB,CNP,COL4A1,CRP,CTGF,EPO,EPOR,F11,F2,F2R,F2RL2,F5,GAS6,GP5,GRIK2,HCLS1,HMGCR,IL6,JAK2,KDR,MERTK,MMP2,MMP7,NR3C1,P2RY1,PDGFA,PDGFRA,PDGFRB,PIK3CG,PLAT,PLAU,PLG,PROC,PROS1,PTGER1,PTGER4,PTGS1,SERPINA5,SERPINC1,SERPINE1,SERPINE2,STIM1,THBD,THBS1,TLR2,TYRO3,VEGFC,VKORC1,VWF	65
Cardiovascular Disease	thrombosis	thrombosis	1.61E-05		0.735	ADRB2,AHR,AKT3 (includes EG:10000),ALOX12,ANGPT1,ANGPT2,ANTXR1,ANXA5,APOE,APOH,APP,AXL,BMPR2,C1QA,C2,CAPN1,CFB,CNP,COL4A1,CRP,CTGF,EPO,EPOR,F11,F2,F2R,F2RL2,F5,GAS6,GP5,GRIK2,HCLS1,HMGCR,IL6,JAK2,KDR,MERTK,MMP2,MMP7,NR3C1,P2RY1,PDGFA,PDGFRA,PDGFRB,PIK3CG,PLAT,PLAU,PLG,PROC,PROS1,PTGER1,PTGER4,PTGS1,SERPINA5,SERPINC1,SERPINE1,SERPINE2,STIM1,THBD,THBS1,TLR2,TYRO3,VEGFC,VKORC1,VWF	65
Cellular Growth and Proliferation	proliferation	proliferation of muscle cells	1.63E-05		1.902	ABCC4 (includes EG:10257),ADM,AGER,AGT,AGTRAP,AIF1 (includes EG:11629),AKR1B1,ANG,APOE,ARG1,ATP2B1,BDNF,BMP4,BMPR2,CACNA1G,CALCRL,CAPN2,CAV1,CCNE1,CDH13,CDKN1A,CDKN1B,CDKN1C,CEBPD,CMA1,COMT,CTNNBIP1,CXADR,CXCL16,E2F3,E4F1,EDN1,EDNRA,EGFR,ELAVL1,ELN,EPO,F2,FBLN5,FGF2,FGFR2,FLT1,FOXM1,FOXO1 (includes EG:2308),GNAQ,GSK3B,HABP2,HBEGF,HES5,HEY2,HGF,HIF1A,HMOX1,HTR2B,ID2,IGFBP3,IGFBP5,IL12A,IL12B,IL15 …	138
Skeletal and Muscular System Development and Function	proliferation	proliferation of muscle cells	1.63E-05		1.902	ABCC4 (includes EG:10257),ADM,AGER,AGT,AGTRAP,AIF1 (includes EG:11629),AKR1B1,ANG,APOE,ARG1,ATP2B1,BDNF,BMP4,BMPR2,CACNA1G,CALCRL,CAPN2,CAV1,CCNE1,CDH13,CDKN1A,CDKN1B,CDKN1C,CEBPD,CMA1,COMT,CTNNBIP1,CXADR,CXCL16,E2F3,E4F1,EDN1,EDNRA,EGFR,ELAVL1,ELN,EPO,F2,FBLN5,FGF2,FGFR2,FLT1,FOXM1,FOXO1 (includes EG:2308),GNAQ,GSK3B,HABP2,HBEGF,HES5,HEY2,HGF,HIF1A,HMOX1,HTR2B,ID2,IGFBP3,IGFBP5,IL12A,IL12B,IL15 …	138
Hematological Disease	myelofibrosis	myelofibrosis	1.64E-05			ABL1,BCR,BMP1,BMP6,BMP7,BMPR2,EPHA2,FDFT1,FKBP1A,FLT3,FYN,IL2RA,IRAK2,JAK2,KIT,LCK,MAPK8,MTOR,NFE2,NR3C1,PDGFRA,PDGFRB,PLOD2,PTH1R,PTH2R,RUNX1,SRC,YES1	28
Organismal Injury and Abnormalities	myelofibrosis	myelofibrosis	1.64E-05			ABL1,BCR,BMP1,BMP6,BMP7,BMPR2,EPHA2,FDFT1,FKBP1A,FLT3,FYN,IL2RA,IRAK2,JAK2,KIT,LCK,MAPK8,MTOR,NFE2,NR3C1,PDGFRA,PDGFRB,PLOD2,PTH1R,PTH2R,RUNX1,SRC,YES1	28
Tissue Development	development	development of extraembryonic tissue	1.64E-05		0.511	ACVR1B,ADAMTS1,ADAMTS8,ADRA2A,ADRA2B,ANG,ANGPT1,BMP4,BMP7,CCNF,CTBP2,ECM1 (includes EG:100332249),EDIL3,EPO,EPOR,ESRRB,ETV6,F2,FGF2,FOSL1,FOXO1 (includes EG:2308),FURIN,FZD5,HGF,HNF1B,LDB1,LEMD3,MAP3K3,MAX,MIB1,MMP2,NBN,NRP1 (includes EG:18186),NRP2,PTEN,PTPN11,PTPRB,PTX3,RNF2,SLURP1,SMO,SRSF5,TFDP1,TIMP3,TMOD1,VHL,YARS	47
Organismal Development	development	development of extraembryonic tissue	1.64E-05		0.511	ACVR1B,ADAMTS1,ADAMTS8,ADRA2A,ADRA2B,ANG,ANGPT1,BMP4,BMP7,CCNF,CTBP2,ECM1 (includes EG:100332249),EDIL3,EPO,EPOR,ESRRB,ETV6,F2,FGF2,FOSL1,FOXO1 (includes EG:2308),FURIN,FZD5,HGF,HNF1B,LDB1,LEMD3,MAP3K3,MAX,MIB1,MMP2,NBN,NRP1 (includes EG:18186),NRP2,PTEN,PTPN11,PTPRB,PTX3,RNF2,SLURP1,SMO,SRSF5,TFDP1,TIMP3,TMOD1,VHL,YARS	47
Embryonic Development	development	development of extraembryonic tissue	1.64E-05		0.511	ACVR1B,ADAMTS1,ADAMTS8,ADRA2A,ADRA2B,ANG,ANGPT1,BMP4,BMP7,CCNF,CTBP2,ECM1 (includes EG:100332249),EDIL3,EPO,EPOR,ESRRB,ETV6,F2,FGF2,FOSL1,FOXO1 (includes EG:2308),FURIN,FZD5,HGF,HNF1B,LDB1,LEMD3,MAP3K3,MAX,MIB1,MMP2,NBN,NRP1 (includes EG:18186),NRP2,PTEN,PTPN11,PTPRB,PTX3,RNF2,SLURP1,SMO,SRSF5,TFDP1,TIMP3,TMOD1,VHL,YARS	47
Cellular Function and Maintenance	permeability	permeability of cells	1.64E-05		0.360	AMOT,AMOTL1,ANGPT1,AQP3,ARHGAP35,CAMP,CASP3,CD151,CDH5,CLDN1,CLMP,COL4A1,CTNNB1,CTTN,ENTPD1,EPHA2,F2,F2R,IL1B,IL4 (includes EG:16189),IL8,KDR,LAMA1,NOS3,NT5E,NTN4,PECAM1,PIK3CG,PLAU,PLCG1,PPP1CA,PPP2CA,PRKCD,PRKCI,PROC,PROCR,RAC1,RAP1A,RAPGEF3,S1PR1,SIGIRR,SPHK1,THBD,THOC1,TNF,VASP,ZEB1	47
Cell Morphology	permeability	permeability of cells	1.64E-05		0.360	AMOT,AMOTL1,ANGPT1,AQP3,ARHGAP35,CAMP,CASP3,CD151,CDH5,CLDN1,CLMP,COL4A1,CTNNB1,CTTN,ENTPD1,EPHA2,F2,F2R,IL1B,IL4 (includes EG:16189),IL8,KDR,LAMA1,NOS3,NT5E,NTN4,PECAM1,PIK3CG,PLAU,PLCG1,PPP1CA,PPP2CA,PRKCD,PRKCI,PROC,PROCR,RAC1,RAP1A,RAPGEF3,S1PR1,SIGIRR,SPHK1,THBD,THOC1,TNF,VASP,ZEB1	47
Cellular Assembly and Organization	remodeling	remodeling of chromatin	1.64E-05		-1.248	ACTL6A,ACTL6B,ARID1A,BAZ1A,BAZ1B,BAZ2A,BNIP3,BPTF,C14orf169,CEBPG,CHD1,CHD1L,FOXA1,GATA3,HDAC4,HDAC5,HMG20B,HNF1A,HSF1 (includes EG:15499),IL2RA,INO80 (includes EG:296084),KLF1,MEN1,MORF4L1,MTA2,NR3C1,POU2F1,RB1,RBBP7,REL,RERE,SATB2,SCMH1,SMARCA2,SMARCA5,SMARCB1,SMARCC1,SMARCD1,SMARCD2,SMARCD3,SMARCE1,SMYD1,STAT6,SUPT4H1,SUV39H2,TAF6L,TTF1	47
Cell Cycle	remodeling	remodeling of chromatin	1.64E-05		-1.248	ACTL6A,ACTL6B,ARID1A,BAZ1A,BAZ1B,BAZ2A,BNIP3,BPTF,C14orf169,CEBPG,CHD1,CHD1L,FOXA1,GATA3,HDAC4,HDAC5,HMG20B,HNF1A,HSF1 (includes EG:15499),IL2RA,INO80 (includes EG:296084),KLF1,MEN1,MORF4L1,MTA2,NR3C1,POU2F1,RB1,RBBP7,REL,RERE,SATB2,SCMH1,SMARCA2,SMARCA5,SMARCB1,SMARCC1,SMARCD1,SMARCD2,SMARCD3,SMARCE1,SMYD1,STAT6,SUPT4H1,SUV39H2,TAF6L,TTF1	47
DNA Replication, Recombination, and Repair	remodeling	remodeling of chromatin	1.64E-05		-1.248	ACTL6A,ACTL6B,ARID1A,BAZ1A,BAZ1B,BAZ2A,BNIP3,BPTF,C14orf169,CEBPG,CHD1,CHD1L,FOXA1,GATA3,HDAC4,HDAC5,HMG20B,HNF1A,HSF1 (includes EG:15499),IL2RA,INO80 (includes EG:296084),KLF1,MEN1,MORF4L1,MTA2,NR3C1,POU2F1,RB1,RBBP7,REL,RERE,SATB2,SCMH1,SMARCA2,SMARCA5,SMARCB1,SMARCC1,SMARCD1,SMARCD2,SMARCD3,SMARCE1,SMYD1,STAT6,SUPT4H1,SUV39H2,TAF6L,TTF1	47
Neurological Disease	neuropathy	neuropathy	1.65E-05		-1.018	AACS,ABCA9,ABCC4 (includes EG:10257),ACHE,ACOT9,ACTA1,ACTB,ACTR3,ACVR2A,ADAM10,ADAM17,ADAMTS12,ADAMTS14,ADAMTS20,ADCK4,ADH1C (includes EG:11522),ADNP2,ADORA2A,ADORA2B,ADRA1B,ADRA1D,ADRA2A,ADRA2B,ADRB1,ADRB2,ADRBK2,AGT,AIMP2,AK5,AK8,AKAP12,AKAP7,ALAS2,ALCAM,ALDH5A1,ALK,ALS2,AMY2A,ANG,ANKS1A,ANKS4B,ANO1,ANXA5,AP1S2,APBB2,APOD,APOE,APOM,APOOL,APP,AQP4,AR,ARAF,ARHGAP10,ARHGDIB,ARHGEF10,ARHGEF37,ARL6I…	846
Cellular Development	differentiation	differentiation of leukemia cell lines	1.67E-05		0.742	ABL1,ADAM10,ALG5,AUP1,B4GALNT1,BCL2L1,BCR,BDH2 (includes EG:295458),BECN1,BTG2,C1QBP,CCND1,CDK2,CDK5R1,CDK6,CEBPD,CHD1,CREBBP,CREG1,CSF1 (includes EG:12977),CSF2,CSF2RB,CTCF (includes EG:10664),CTSK,CUL4A,DEDD,E2F1,EGR1,ENO1,EPO,ETV6,FES,FLI1,FOXO3,GATA1,GATA2,GNA15,HIF1A,HOXA5,IL1RN,IL6,IL6ST,INHBA,INPP5D,KAT6A,KITLG,KLF4,LIF,LIFR,LYN,MAP2K1,MAPK14,MAPK8,MAPK9,MAX,MCC,MCL1,MIF,MST4,MUC1,MYB,MYC,…	97
Cancer	prostate cancer	prostate cancer	1.72E-05		0.071	ABCA5,ABCC4 (includes EG:10257),ABL1,ACO1,ACTC1,ADRB1,AFAP1,AGER,AGR2,AKT2,AKT3 (includes EG:10000),ALDH1A1,ALDH2,ALDH5A1,ALDH7A1,ALOX12,ALOX5,AMFR,ANGPT1,ANO6,ANTXR1,ANTXR2,APOD,APOLD1,AR,ARG2 (includes EG:11847),ARHGDIB,ASPH,ASS1,ATP1A1,ATP1A2,ATP1A4,ATXN1,AURKA,AURKB,AXDND1,BAMBI,BCL2L1,BCR,BHLHE40,BIRC5,BMPR1A,BMPR1B,BMPR2,BMX,BRAF,BTG3,C3,C9orf5,CACNG3,CASC3,CASP8,CAV1,CBFB,CCL25,CCL5,CCND1,…	411
Genetic Disorder	prostate cancer	prostate cancer	1.72E-05		0.071	ABCA5,ABCC4 (includes EG:10257),ABL1,ACO1,ACTC1,ADRB1,AFAP1,AGER,AGR2,AKT2,AKT3 (includes EG:10000),ALDH1A1,ALDH2,ALDH5A1,ALDH7A1,ALOX12,ALOX5,AMFR,ANGPT1,ANO6,ANTXR1,ANTXR2,APOD,APOLD1,AR,ARG2 (includes EG:11847),ARHGDIB,ASPH,ASS1,ATP1A1,ATP1A2,ATP1A4,ATXN1,AURKA,AURKB,AXDND1,BAMBI,BCL2L1,BCR,BHLHE40,BIRC5,BMPR1A,BMPR1B,BMPR2,BMX,BRAF,BTG3,C3,C9orf5,CACNG3,CASC3,CASP8,CAV1,CBFB,CCL25,CCL5,CCND1,…	411
Reproductive System Disease	prostate cancer	prostate cancer	1.72E-05		0.071	ABCA5,ABCC4 (includes EG:10257),ABL1,ACO1,ACTC1,ADRB1,AFAP1,AGER,AGR2,AKT2,AKT3 (includes EG:10000),ALDH1A1,ALDH2,ALDH5A1,ALDH7A1,ALOX12,ALOX5,AMFR,ANGPT1,ANO6,ANTXR1,ANTXR2,APOD,APOLD1,AR,ARG2 (includes EG:11847),ARHGDIB,ASPH,ASS1,ATP1A1,ATP1A2,ATP1A4,ATXN1,AURKA,AURKB,AXDND1,BAMBI,BCL2L1,BCR,BHLHE40,BIRC5,BMPR1A,BMPR1B,BMPR2,BMX,BRAF,BTG3,C3,C9orf5,CACNG3,CASC3,CASP8,CAV1,CBFB,CCL25,CCL5,CCND1,…	411
Cardiovascular System Development and Function	dilation	dilation of heart ventricle	1.74E-05		-0.347	ADCY5,ADRB2,BGN,BNIP3,CAMK2D,CAV1,CAV3,CCNA2,DDC,EPO,F2R,FSTL3,GAB1,GAB2,GNAQ,HBEGF,KLF15,LMNA,MARCKSL1,MEF2A,MMP9,NOS1,NOS2,PLAU,PLCE1,PPP3R1,PRDX3,PTGES,RHOA,ROCK1,SERPINE1,SERPINF2,SLC2A1,SPEG,SPP1 (includes EG:20750),TGFBR2,TIMP1,TNF	38
Organ Morphology	dilation	dilation of heart ventricle	1.74E-05		-0.347	ADCY5,ADRB2,BGN,BNIP3,CAMK2D,CAV1,CAV3,CCNA2,DDC,EPO,F2R,FSTL3,GAB1,GAB2,GNAQ,HBEGF,KLF15,LMNA,MARCKSL1,MEF2A,MMP9,NOS1,NOS2,PLAU,PLCE1,PPP3R1,PRDX3,PTGES,RHOA,ROCK1,SERPINE1,SERPINF2,SLC2A1,SPEG,SPP1 (includes EG:20750),TGFBR2,TIMP1,TNF	38
Cellular Growth and Proliferation	proliferation	proliferation of liver cells	1.74E-05		-0.811	AGT,AHR,ARNT,C3,C3AR1,C5,CASP8,CCND1,CCND3,CDKN1A,CDKN1B,CFLAR,CITED2,CTGF,CTNNB1,CXCR4,DICER1,E2F1,EDN1,EGFR,F2,FAS,FGF18,FLT1,FOS,FOXM1,GSK3B,HGF,HNF1A,IFT88,IGF1R,IKBKB,IL1B,IL1RN,IL6,INSR,ITGAV,ITGB3,KITLG,LGALS1,LGALS3,LTA,MAP2K7,MAPK8,MAPK9,MED1 (includes EG:19014),MET,MST1 (includes EG:15235),MT1E,MT2A,MYC,NCF1,NFATC3,NFE2L2,NFKB1,NGFR,NPPC,NR1I3,OSM,PIK3IP1,PIK3R1,PLG,PML,PPARA,PPARD,RARA…	83
Hepatic System Development and Function	proliferation	proliferation of liver cells	1.74E-05		-0.811	AGT,AHR,ARNT,C3,C3AR1,C5,CASP8,CCND1,CCND3,CDKN1A,CDKN1B,CFLAR,CITED2,CTGF,CTNNB1,CXCR4,DICER1,E2F1,EDN1,EGFR,F2,FAS,FGF18,FLT1,FOS,FOXM1,GSK3B,HGF,HNF1A,IFT88,IGF1R,IKBKB,IL1B,IL1RN,IL6,INSR,ITGAV,ITGB3,KITLG,LGALS1,LGALS3,LTA,MAP2K7,MAPK8,MAPK9,MED1 (includes EG:19014),MET,MST1 (includes EG:15235),MT1E,MT2A,MYC,NCF1,NFATC3,NFE2L2,NFKB1,NGFR,NPPC,NR1I3,OSM,PIK3IP1,PIK3R1,PLG,PML,PPARA,PPARD,RARA…	83
Cell Death	apoptosis	apoptosis of pheochromocytoma cell lines	1.75E-05		-0.007	ADORA2A,AGT,AKAP1,ANGPT2,APP,ATF3,BTG2,CALB1,CASP2,CASP3,CAT,CYCS,DDIT4,DHCR24,DYNLL1,E2F2,EGFR,FAIM,FAS,FGF2,G6PD,GAB1,GAL,GALR2,GEM,GSK3B,HSPB1,HTT,JUN,MAGED1,MAP3K1,MAPK10,MAPK11,MAPK12,MAPK13,MAPK14,MAPK8,MAPK9,MYC,NFKBIA,NGF,NOS1,NOS2,PA2G4,PPP2R1A,PSAP,PSEN2,PTPN6,RPS3,SHC1 (includes EG:20416),SIAH1,SOD1,SOD2,SPHK2,TNF,TNFRSF1A,TP53 (includes EG:22059),VCAN,ZMAT3	59
Tissue Development	development	cartilage development	1.77E-05		-1.251	Acan,ARSB,ATP7A,B4GALNT1,BMP1,BMP2,BMP4,BMPR1A,BMPR1B,CHST11,CHST12,CHST13,CHST3,CHSY1,COL10A1,COL11A1,COL11A2,CREB3L2,CREBBP,CSGALNACT1,CYR61,DLL3,DLX2,DSE,EDN1,EIF2AK3,ENPP1,ESRRA,FBXW4,FGF18,FGFR3,GNPDA1,GRN,GSK3B,HES5,HIF1A,HOXA3,HOXA5,HOXB3,HOXC4,IL17F,IMPAD1,MAPK3,MEF2C,MMP13,MMP14,MSX1,MSX2,NKX3-2,NOG,PBX1,PDGFA,PRRX1,PRRX2,PTCH1,PTHLH,RARA,RARG,SATB2,SHOX2,SMAD1,SMAD3,SNAI1,SNAI2,SOX6,TGF…	74
Connective Tissue Development and Function	development	cartilage development	1.77E-05		-1.251	Acan,ARSB,ATP7A,B4GALNT1,BMP1,BMP2,BMP4,BMPR1A,BMPR1B,CHST11,CHST12,CHST13,CHST3,CHSY1,COL10A1,COL11A1,COL11A2,CREB3L2,CREBBP,CSGALNACT1,CYR61,DLL3,DLX2,DSE,EDN1,EIF2AK3,ENPP1,ESRRA,FBXW4,FGF18,FGFR3,GNPDA1,GRN,GSK3B,HES5,HIF1A,HOXA3,HOXA5,HOXB3,HOXC4,IL17F,IMPAD1,MAPK3,MEF2C,MMP13,MMP14,MSX1,MSX2,NKX3-2,NOG,PBX1,PDGFA,PRRX1,PRRX2,PTCH1,PTHLH,RARA,RARG,SATB2,SHOX2,SMAD1,SMAD3,SNAI1,SNAI2,SOX6,TGF…	74
Skeletal and Muscular System Development and Function	development	cartilage development	1.77E-05		-1.251	Acan,ARSB,ATP7A,B4GALNT1,BMP1,BMP2,BMP4,BMPR1A,BMPR1B,CHST11,CHST12,CHST13,CHST3,CHSY1,COL10A1,COL11A1,COL11A2,CREB3L2,CREBBP,CSGALNACT1,CYR61,DLL3,DLX2,DSE,EDN1,EIF2AK3,ENPP1,ESRRA,FBXW4,FGF18,FGFR3,GNPDA1,GRN,GSK3B,HES5,HIF1A,HOXA3,HOXA5,HOXB3,HOXC4,IL17F,IMPAD1,MAPK3,MEF2C,MMP13,MMP14,MSX1,MSX2,NKX3-2,NOG,PBX1,PDGFA,PRRX1,PRRX2,PTCH1,PTHLH,RARA,RARG,SATB2,SHOX2,SMAD1,SMAD3,SNAI1,SNAI2,SOX6,TGF…	74
Cancer	bone cancer	bone cancer	1.88E-05		-1.136	ABL1,ACP5,ALK,APC,BCL2L1,BCR,BMI1,BRAF,CACNA2D1,CACNA2D2,CACNA2D4,CDKN2B,CDKN2D,CHEK2,CSF1R,DHFR,EPHA2,EWSR1,EXT1,FDFT1,FGFR1,FGFR3,FLI1,FLT1,FLT3,FOS,FYN,GART,GLI1,HSP90AB1,HSP90B1,IL6,JUN,KDR,KIF11,KIT,LCK,LGALS3BP,MET,MMP9,MST1R,MTOR,MYC,PDGFRA,PDGFRB,PLAU,PLAUR,PTCH1,RB1,RPS4Y1,RPS6KA3,SDC2,SERPINE1,SMO,SPARC,SPP1 (includes EG:20750),SRC,STOML2,THBS3,TNF,TNFRSF11A,TP53 (includes EG:22059),TUB…	72
Skeletal and Muscular Disorders	bone cancer	bone cancer	1.88E-05		-1.136	ABL1,ACP5,ALK,APC,BCL2L1,BCR,BMI1,BRAF,CACNA2D1,CACNA2D2,CACNA2D4,CDKN2B,CDKN2D,CHEK2,CSF1R,DHFR,EPHA2,EWSR1,EXT1,FDFT1,FGFR1,FGFR3,FLI1,FLT1,FLT3,FOS,FYN,GART,GLI1,HSP90AB1,HSP90B1,IL6,JUN,KDR,KIF11,KIT,LCK,LGALS3BP,MET,MMP9,MST1R,MTOR,MYC,PDGFRA,PDGFRB,PLAU,PLAUR,PTCH1,RB1,RPS4Y1,RPS6KA3,SDC2,SERPINE1,SMO,SPARC,SPP1 (includes EG:20750),SRC,STOML2,THBS3,TNF,TNFRSF11A,TP53 (includes EG:22059),TUB…	72
Cellular Assembly and Organization	growth	growth of plasma membrane projections	1.92E-05	Increased	2.806	A2M,ABL1,ADAM10,ADAM17,ADORA2A,ALS2,ANP32A,APOE,APP,AR,ARG1,ARHGAP17,ARHGAP32,ARHGEF25,BAIAP2,BASP1,BCAN,BCR,BDNF,BMP2,BMP4,BMP7,BTG3,CACNA1A,CAT,CD9,CDH2,CDK1,CDK2,CDK5,CDK5R1,CDK5R2,CNPY2,CREB1,CSF1 (includes EG:12977),CSNK1D,CXCL9,CYP19A1,DIXDC1,DNAJA3,DOK4,DPYSL2,DVL1,E2F1,EFNA1,EFNB1,EFNB2,EFNB3,EGFR,EIF4EBP1,ELK1,ELMO2,EPHB2,EPHB3,EXOC7,EXT1,F2,FAIM,FAS,FEZ1,FGF1,FGF18,FGF2,FGF7,FGFR1,FGFR3…	212
Cellular Movement	cell movement	cell movement of melanoma cell lines	1.98E-05		-0.362	CAPN1,CD151,CD36,CDH1,CDKN1B,CNN1 (includes EG:1264),COL4A3,CTBP1,CXCL9,CXCR4,EPO,FLNA,ITGA2,ITGB1,ITPR1,L1CAM,LAMA5,LTBP2,MFI2,MMP2,MX1,NGF,PRKCA,PRL,PRNP,PTK2B (includes EG:19229),RAP1GAP,RAPGEF3,RHOA,RHOC,S1PR3,SDCBP,SHC4,SIVA1,SKI,SPHK1,SPP1 (includes EG:20750),TIMP2 (includes EG:21858),WASF2,WNT5A	40
Tissue Morphology	quantity	quantity of lymphatic system cells	2.02E-05		0.737	AHR,BCL2A1,BCL2L1,BIRC5,CASP8,CD180,CD80 (includes EG:12519),CD9,CDKN1A,CLEC11A,CREBBP,CSF1 (includes EG:12977),CSF2,CYLD,EPO,ETS1,FANCC,FES,FLI1,FLNA,FLT3LG,FOXI1,GAST,GATA1,GATA2,GBA,GNA12,GNA13,IL1A,IL1B,IL6,INPP5D,ITGA1,KITLG,LTA,LTBR,MAP3K7 (includes EG:172842),MED1 (includes EG:19014),MEIS1,MLH1,MPL,MXD1,MYBL2,MYD88,NEDD9,NFATC2,NFATC3,NFKB1,NFKB2,NKX2-3,NLK,NOTCH2,NQO1,PBX1,PECAM1,PSMB10,P…	79
Lymphoid Tissue Structure and Development	quantity	quantity of lymphatic system cells	2.02E-05		0.737	AHR,BCL2A1,BCL2L1,BIRC5,CASP8,CD180,CD80 (includes EG:12519),CD9,CDKN1A,CLEC11A,CREBBP,CSF1 (includes EG:12977),CSF2,CYLD,EPO,ETS1,FANCC,FES,FLI1,FLNA,FLT3LG,FOXI1,GAST,GATA1,GATA2,GBA,GNA12,GNA13,IL1A,IL1B,IL6,INPP5D,ITGA1,KITLG,LTA,LTBR,MAP3K7 (includes EG:172842),MED1 (includes EG:19014),MEIS1,MLH1,MPL,MXD1,MYBL2,MYD88,NEDD9,NFATC2,NFATC3,NFKB1,NFKB2,NKX2-3,NLK,NOTCH2,NQO1,PBX1,PECAM1,PSMB10,P…	79
Cancer	T-cell non-Hodgkin's disease	T-cell non-Hodgkin's disease	2.06E-05		1.457	ABL1,ADA,AKT2,AKT3 (includes EG:10000),ALK,ATM,BCL2L1,BCL6,BCR,BIRC5,CCR7,CDK2,CDKN1B,CDKN2C,CHEK1,COL3A1,COL4A1,COL4A2,CXCL9,CXCR3,CYR61,DCN,DDB2,DHFR,DPP4,DTX1,E2F2,EGR1,ETV6,FAS,FKBP1A,GADD45A,GADD45B,GLI1,GSK3B,HDAC1,HDAC10,HDAC11,HDAC2,HDAC3,HDAC4,HDAC5,HDAC6,HDAC7,HDAC9,ID1,IER3,IL15 (includes EG:16168),IL16,IL2RA,IL2RB,IL2RG,JUN,KIT,MAP3K8,MC2R,MET,MMP9,MNT,MSH2,MST1R,MTOR,MXI1,MYC,NAV3,NF…	108
Hematological Disease	T-cell non-Hodgkin's disease	T-cell non-Hodgkin's disease	2.06E-05		1.457	ABL1,ADA,AKT2,AKT3 (includes EG:10000),ALK,ATM,BCL2L1,BCL6,BCR,BIRC5,CCR7,CDK2,CDKN1B,CDKN2C,CHEK1,COL3A1,COL4A1,COL4A2,CXCL9,CXCR3,CYR61,DCN,DDB2,DHFR,DPP4,DTX1,E2F2,EGR1,ETV6,FAS,FKBP1A,GADD45A,GADD45B,GLI1,GSK3B,HDAC1,HDAC10,HDAC11,HDAC2,HDAC3,HDAC4,HDAC5,HDAC6,HDAC7,HDAC9,ID1,IER3,IL15 (includes EG:16168),IL16,IL2RA,IL2RB,IL2RG,JUN,KIT,MAP3K8,MC2R,MET,MMP9,MNT,MSH2,MST1R,MTOR,MXI1,MYC,NAV3,NF…	108
Cell Death	apoptosis	apoptosis of lymphoma cell lines	2.06E-05		0.052	ABL1,AFP,BACH2,BCL10,BCL2A1,BCL2L1,BCR,BIRC3,BIRC5,BLNK,BMP2,BMX,CASP2,CASP3,CASP4,CASP8,CASP9 (includes EG:100140945),CAT,CBX5,CCND3,CD4,CD40,CD48,CD55,CD59 (includes EG:25407),CDKN1A,CFLAR,CHEK2,CNN2,CSF2,CTCF (includes EG:10664),DIABLO,DUSP1,DUT,EIF2AK2,EIF2AK3,EIF4E,ERN1,FADD,FAS,FCER1A,FCGR2B,FGF2,FUBP1,FXN,GGT1,GPR65,HDAC11,HNRNPC,HOXB9,HSPB1,IGFBP3,IGFBP4,IGFBP7,IL15 (includes EG:16168),IL…	108
Tissue Development	development	development of nervous tissue	2.13E-05		1.966	ABI2,ABL2,ACHE,ACTB,ACTR3,ADAM19,ADORA2A,AFG3L2,AGER,AGRN,AKAP5,ALDH1A1,ALK,ALS2,AMIGO1,APC,APOE,APP,ARHGEF25,ATL1,ATOH7,ATP7A,ATXN10,B4GALNT1,BACE1,BAIAP2,BASP1,BBS2,BBS4,BDNF,BMP4,BMP7,BRAF,BRSK1,BRSK2,BTG2,C1orf187,CACNA1A,CACNA1F,CADPS2,CAMK1D,CAMK2A,CAPZB,CAV1,CDC20,CDH2,CDK5,CDK5R1,CDK5R2,CDKN1C,CELSR2,CHD7,CHN1,CHRNA1,CHRNB2,CHRNE,CIT,CLU,CNP,CNTNAP1,CREB1,CRHR1,CRMP1,CSNK2A2,CSNK2B,CSPG4,…	364
Cell Death	cell death	cell death of hepatocytes	2.16E-05		0.676	AHR,ATF7,BAK1,CASP3,CASP7,CASP8,CASP9 (includes EG:100140945),CD40,CDKN1A,CDKN1B,CHUK,CIT,CTSB,CYP7A1,DAXX,DDIT3,DICER1,EGFR,ENDOG,EPO,FAAH,FADD,FAS,FGL2,FOS,GADD45B,GSK3B,HGF,HMOX1,IKBKB,IL1RN,IL2RA,IL4 (includes EG:16189),IL6,INHA,IRF5,JUN,MAP2K1,MAPK8,MAPK9,MED1 (includes EG:19014),MET,MTOR,MYC,MYD88,NCF1,NFE2L2,NFKB1,NOS2,NR0B2,NR1H4,NR1I3,OSM,PIK3R1,PTGER1,PTPN1,RB1,RBCK1,SH3BP5,SLC25A4,SMAD…	77
Cellular Movement	cell movement	cell movement of muscle cells	2.21E-05		1.235	ADM,AGER,AGT,APOE,BMP2,BMPR2,CALCRL,CCL5,CCND1,CCR8,CD47,CDKN1B,CLIC4,COL4A3,COMP,CSF1 (includes EG:12977),CSF2,CTSL2,CYP2J2,ELN,F2,F2R,FBLN5,FGF2,FGFR1,FOXO1 (includes EG:2308),FOXO4,FURIN,GAB1,GIT1 (includes EG:216963),HBEGF,HGF,IGFBP2,IGFBP4,IGFBP5,IL18 (includes EG:16173),IL1A,IL1B,IL6,IL6ST,ITGB1,ITGB5,LDLR,LOX,LPAR1,LPAR2,LTA,MAPKAPK2,MET,MMP2,MMP7,MMP9,MYC,NFE2L2,NGF,NOX1,NQO1,PDGFRB,PLA2G…	84
Cell Death	cell death	cell death of lymphoma cell lines	2.23E-05		0.294	ABL1,ADAM17,AFP,BACH2,BCL10,BCL2A1,BCL2L1,BCR,BIRC3,BIRC5,BLNK,BMP2,BMX,BTG2,CASP2,CASP3,CASP4,CASP8,CASP9 (includes EG:100140945),CAT,CBX5,CCND3,CD4,CD40,CD48,CD55,CD59 (includes EG:25407),CDKN1A,CFLAR,CHEK2,CNN2,CSF2,CTCF (includes EG:10664),DIABLO,DUSP1,DUT,EIF2AK2,EIF2AK3,EIF4E,ERN1,FADD,FAS,FCER1A,FCGR2B,FGF2,FTH1 (includes EG:14319),FUBP1,FXN,GGT1,GPR65,HDAC11,HNRNPC,HOXA7,HOXB9,HSPB1,IGFBP…	124
Cancer	chronic leukemia	chronic leukemia	2.23E-05		-0.447	ABL1,ADA,ADORA2A,ALDH5A1,ALOX5,ARHGAP26,ARL11,AXL,BAK1,BCL2L1,BCL6,BCR,BRAF,CCND1,CD247,CD27,CD3D,CD3E,CD3G,CD40,CD55,CD59 (includes EG:25407),CD80 (includes EG:12519),CD86,CDK1,CDK19,CDK2,CDK3,CDK4,CDK5,CDK6,CDK7,CDKN1A,CHUK,CPT1A,CPT1B,CSF1R,CSF2,CTNNB1,CXCR4,DCK,DHFR,DNM1L,DPP4,EPHA2,EPO,EPOR,FGFR1,FGFR2,FLT3,FNTA,FNTB,FOXO1 (includes EG:2308),FOXO3,FYN,GAD2,GATA2,GSK3B,HDAC1,HDAC3,HMGCR,HTR3E…	124
Hematological Disease	chronic leukemia	chronic leukemia	2.23E-05		-0.447	ABL1,ADA,ADORA2A,ALDH5A1,ALOX5,ARHGAP26,ARL11,AXL,BAK1,BCL2L1,BCL6,BCR,BRAF,CCND1,CD247,CD27,CD3D,CD3E,CD3G,CD40,CD55,CD59 (includes EG:25407),CD80 (includes EG:12519),CD86,CDK1,CDK19,CDK2,CDK3,CDK4,CDK5,CDK6,CDK7,CDKN1A,CHUK,CPT1A,CPT1B,CSF1R,CSF2,CTNNB1,CXCR4,DCK,DHFR,DNM1L,DPP4,EPHA2,EPO,EPOR,FGFR1,FGFR2,FLT3,FNTA,FNTB,FOXO1 (includes EG:2308),FOXO3,FYN,GAD2,GATA2,GSK3B,HDAC1,HDAC3,HMGCR,HTR3E…	124
Cell Death	cell death	cell death of lymphoid organ	2.24E-05		0.209	ABL1,ADA,ADORA2A,ADORA2B,ADRB1,AHR,ATM,BAD,BAK1,BCL2L1,BIRC5,BMF,BMP4,BRCA1,CASP3,CASP8,CASP9 (includes EG:100140945),CD3E,CD4,CD40,CDK2,CDKN1A,CHEK1,CHEK2,CHRNA1,CHUK,CTNNB1,DDIT4,DFFA,DNAJA3,E2F1,EGR1,EGR3,ETS2,FADD,FAS,FOS,FYN,GFI1,GZMA,HIST1H1C,HOXA3,HSPA5,ID3 (includes EG:15903),IKBKB,IL6R,IL6ST,IL7,JUN,KIFAP3,LGALS1,MAP3K2,MAPK8,MAPK9,MCL1,MXD3,MYC,MYD88,NFKBID,NGF,NQO1,NQO2,NR3C1,NR4A1,NR5…	96
Cell Death	apoptosis	apoptosis of muscle cells	2.33E-05		-0.015	ADCY5,ADM,ADRB1,ADRB2,AGT,ALDOA,ARRB2,ATP2B4,BCL2L1,BECN1,BIRC5,BMP2,BNIP3,CAMK2D,CAPN1,CASP3,CASP8,CASP9 (includes EG:100140945),CAV3,CCNT1,CDC42EP3,CDKN1A,CDKN1C,COQ6,CSF1R,CTF1,CYBB,DAG1,DICER1,DSP,DUSP6,E2F1,EDN1,EEF1D,EPO,FADD,FAS,FOSL1,FOXO1 (includes EG:2308),FSTL1,FSTL3,GNAQ,GNPTG,GSK3A,GSK3B,GSN,HGF,HIF1A,HLA-DMA,HSPB1,HSPB6,HSPB8,HSPE1,HTR2B,ID2,IGF1R,IL1A,IL1B,IL6,IL6ST,INHBA,IRAK4,IRF…	119
DNA Replication, Recombination, and Repair	damage	DNA damage	2.35E-05		1.574	AGT,AHR,APTX,ATG5 (includes EG:11793),ATM,ATR,BDKRB2,BECN1,BIRC5,BRCA1,CALR,CAMP,CASP3,CASP8,CAT,CDC14B,CHEK1,CHEK2,CLU,CTSS,DFFB,DICER1,DNASE1,E2F1,E2F2,EIF2AK2,ERCC1,GMNN,GNAI2,GSTP1,H2AFX,IFNGR1,IL18 (includes EG:16173),IL1B,LIG1,LONP1,MCM10 (includes EG:307126),MSH6,MYC,NBN,NEIL1,NOS1,NQO1,NUDT1,OGG1,OLR1,PARP1,PAXIP1,PBK,PDIA3,PLK1,PML,POLB,POLI,POLK,POLL,PRDX1,PRKCZ,PRKDC,PRMT1,PRNP,PTEN,RA…	89
Cellular Movement	cell movement	cell movement of vascular smooth muscle cells	2.36E-05		1.124	ADM,AGER,AGT,BMP2,BMPR2,CALCRL,CCND1,CCR8,CLIC4,COMP,CSF2,CYP2J2,F2,FBLN5,FGF2,FGFR1,FOXO4,GIT1 (includes EG:216963),IGFBP2,IGFBP4,IGFBP5,IL1A,IL1B,IL6,IL6ST,ITGB5,LTA,MMP2,NFE2L2,NOX1,NQO1,PDGFRB,PLA2G4A,PLAUR,POLDIP2,PTPRF,RAC1,RAMP2,RAMP3,S100A4,SDC4,TNF,TRIB1,WISP2	44
Skeletal and Muscular System Development and Function	cell movement	cell movement of vascular smooth muscle cells	2.36E-05		1.124	ADM,AGER,AGT,BMP2,BMPR2,CALCRL,CCND1,CCR8,CLIC4,COMP,CSF2,CYP2J2,F2,FBLN5,FGF2,FGFR1,FOXO4,GIT1 (includes EG:216963),IGFBP2,IGFBP4,IGFBP5,IL1A,IL1B,IL6,IL6ST,ITGB5,LTA,MMP2,NFE2L2,NOX1,NQO1,PDGFRB,PLA2G4A,PLAUR,POLDIP2,PTPRF,RAC1,RAMP2,RAMP3,S100A4,SDC4,TNF,TRIB1,WISP2	44
Cancer	tumorigenesis	tumorigenesis of blood tumor	2.36E-05		0.587	ALK,ATM,BCL2L1,BMI1,BRD2,CDK2,CDKN1A,CDKN1B,CDKN2C,CYP1B1,DCN,DMTF1,E2F1,E2F2,ETV6,IL6,KIF11,MAP3K8,MCL1,MDM4,MLH1,MSH2,MYC,NFKBIA,NQO1,NRAS,PBX1,PDGFRB,PIM1,PIM2,PMS2,PRF1,PRKDC,PTEN,PTPN1,RB1,REL,SKIL,TCF3,TNFSF10,TP53 (includes EG:22059),WWOX,XRCC5,XRCC6	44
Hematological Disease	tumorigenesis	tumorigenesis of blood tumor	2.36E-05		0.587	ALK,ATM,BCL2L1,BMI1,BRD2,CDK2,CDKN1A,CDKN1B,CDKN2C,CYP1B1,DCN,DMTF1,E2F1,E2F2,ETV6,IL6,KIF11,MAP3K8,MCL1,MDM4,MLH1,MSH2,MYC,NFKBIA,NQO1,NRAS,PBX1,PDGFRB,PIM1,PIM2,PMS2,PRF1,PRKDC,PTEN,PTPN1,RB1,REL,SKIL,TCF3,TNFSF10,TP53 (includes EG:22059),WWOX,XRCC5,XRCC6	44
Gastrointestinal Disease	Crohn's disease	Crohn's disease	2.41E-05			ABCA10,ABCB11,ABCC4 (includes EG:10257),ABCD3,ABCG1,ABHD3,ACOT7,ACPP,ACSL1,ACSL6,ADAMTS12,ADAMTS16,ADAMTS2,ADAMTS3,ADCY3,ADSL,AGPS,AK5,AKAP11,AKAP6,AKD1,ALB,ALCAM,ALOX12,ALOX5,ALPK2,AMT,ANK2,ANKFY1,ANO4,AOAH,APEH,APP,ARHGAP18,ARHGAP19,ARNT2,ASAP3,ASB7,ASPH,ASTN2,ATG16L1,ATP1B1,ATP2B2,ATP8B1,ATPAF1-AS1,ATRNL1,ATXN1,AXDND1,B4GALT4,BACH1,BANP,BCAS3,BCKDHB,BCR,BMP3,BNC1,BOLA3,BRE,C12orf50,C14orf105,C…	750
Genetic Disorder	Crohn's disease	Crohn's disease	2.41E-05			ABCA10,ABCB11,ABCC4 (includes EG:10257),ABCD3,ABCG1,ABHD3,ACOT7,ACPP,ACSL1,ACSL6,ADAMTS12,ADAMTS16,ADAMTS2,ADAMTS3,ADCY3,ADSL,AGPS,AK5,AKAP11,AKAP6,AKD1,ALB,ALCAM,ALOX12,ALOX5,ALPK2,AMT,ANK2,ANKFY1,ANO4,AOAH,APEH,APP,ARHGAP18,ARHGAP19,ARNT2,ASAP3,ASB7,ASPH,ASTN2,ATG16L1,ATP1B1,ATP2B2,ATP8B1,ATPAF1-AS1,ATRNL1,ATXN1,AXDND1,B4GALT4,BACH1,BANP,BCAS3,BCKDHB,BCR,BMP3,BNC1,BOLA3,BRE,C12orf50,C14orf105,C…	750
Inflammatory Disease	Crohn's disease	Crohn's disease	2.41E-05			ABCA10,ABCB11,ABCC4 (includes EG:10257),ABCD3,ABCG1,ABHD3,ACOT7,ACPP,ACSL1,ACSL6,ADAMTS12,ADAMTS16,ADAMTS2,ADAMTS3,ADCY3,ADSL,AGPS,AK5,AKAP11,AKAP6,AKD1,ALB,ALCAM,ALOX12,ALOX5,ALPK2,AMT,ANK2,ANKFY1,ANO4,AOAH,APEH,APP,ARHGAP18,ARHGAP19,ARNT2,ASAP3,ASB7,ASPH,ASTN2,ATG16L1,ATP1B1,ATP2B2,ATP8B1,ATPAF1-AS1,ATRNL1,ATXN1,AXDND1,B4GALT4,BACH1,BANP,BCAS3,BCKDHB,BCR,BMP3,BNC1,BOLA3,BRE,C12orf50,C14orf105,C…	750
Lipid Metabolism	beta-oxidation	beta-oxidation of fatty acid	2.48E-05		0.785	ABCD1,ABCD3,ACAA2,ACADM,ACADS,ACADSB,ACADVL,ACOX1,ACOX2,ACOX3,ACSL5,AKT2,BDH2 (includes EG:295458),CPT1A,CPT1B,CPT2,CYP19A1,DECR1,ECHS1,ECI1,ECI2,EHHADH,EPAS1,ESRRA,FABP2,HADH,HADHA,HADHB,HSD11B1,HSD17B4,IRS1,MLYCD,MTOR,PEX2 (includes EG:19302),PEX5,PEX7 (includes EG:18634),PLIN1,PNPLA2,PPARA,PPARD,PPARGC1A,SLC22A5,SLC25A17,SLC27A2,TNF,UCHL3	46
Small Molecule Biochemistry	beta-oxidation	beta-oxidation of fatty acid	2.48E-05		0.785	ABCD1,ABCD3,ACAA2,ACADM,ACADS,ACADSB,ACADVL,ACOX1,ACOX2,ACOX3,ACSL5,AKT2,BDH2 (includes EG:295458),CPT1A,CPT1B,CPT2,CYP19A1,DECR1,ECHS1,ECI1,ECI2,EHHADH,EPAS1,ESRRA,FABP2,HADH,HADHA,HADHB,HSD11B1,HSD17B4,IRS1,MLYCD,MTOR,PEX2 (includes EG:19302),PEX5,PEX7 (includes EG:18634),PLIN1,PNPLA2,PPARA,PPARD,PPARGC1A,SLC22A5,SLC25A17,SLC27A2,TNF,UCHL3	46
Energy Production	beta-oxidation	beta-oxidation of fatty acid	2.48E-05		0.785	ABCD1,ABCD3,ACAA2,ACADM,ACADS,ACADSB,ACADVL,ACOX1,ACOX2,ACOX3,ACSL5,AKT2,BDH2 (includes EG:295458),CPT1A,CPT1B,CPT2,CYP19A1,DECR1,ECHS1,ECI1,ECI2,EHHADH,EPAS1,ESRRA,FABP2,HADH,HADHA,HADHB,HSD11B1,HSD17B4,IRS1,MLYCD,MTOR,PEX2 (includes EG:19302),PEX5,PEX7 (includes EG:18634),PLIN1,PNPLA2,PPARA,PPARD,PPARGC1A,SLC22A5,SLC25A17,SLC27A2,TNF,UCHL3	46
Molecular Transport	export	export of molecule	2.54E-05		-0.929	ABCB11,ABCC1,ABCG2,AGFG1,ALB,ATP7A,ATP7B,CALR,CCHCR1,DDX19B,DDX25,DDX39A,DDX39B,EIF4E,EIF5A,FYTTD1,GLE1 (includes EG:2733),GSK3B,HHEX,HSPA9,KHDRBS1,NCBP1,NR1I2,NUDT4,NUP107,NUP133 (includes EG:234865),NUP160,NUP214,NUP98,NUPL2,NXF1,NXT1,PCYT1A,PHAX,PTPN11,RAE1,SIRT1,SLC11A1,SLC9A3,SMG1,SMG5,SMG6,SMG7,STRADA,STRADB,THOC1,THOC2,THOC4,THOC5,THOC6,UHMK1,UPF1,UPF2,XPO1,XPO5,XPO6,XPOT,YWHAE	58
Inflammatory Response	response	response of macrophages	2.54E-05		1.421	ABCA7,AGER,APOA1,APOA2,APP,CAMP,CCL22,CD14,CD36,CD47,CNN2,CSF2,DEF6,EIF2AK1,F2R,FAS,FCGR2B,FGR,GAB2,HCK,HMOX1,IL18 (includes EG:16173),IL4 (includes EG:16189),IL6,INPP5D,IRF2,IRF8,ITGB2,LYN,MAPK14,MFGE8,MYD88,NCOA2,NOS2,NR3C1,O3FAR1,P2RX7,PGLYRP1,PRKCE,PROC,PTEN,RAPGEF3,SERPINE1,SOCS1,SPHK1,SPI1 (includes EG:20375),SPON2,TGM2,THBS1,TLR2,TLR3,TLR4,TLR9,TNF,TREM1,TREM2,TRPV2,XBP1 (includes EG:14061…	58
Cell-To-Cell Signaling and Interaction	response	response of macrophages	2.54E-05		1.421	ABCA7,AGER,APOA1,APOA2,APP,CAMP,CCL22,CD14,CD36,CD47,CNN2,CSF2,DEF6,EIF2AK1,F2R,FAS,FCGR2B,FGR,GAB2,HCK,HMOX1,IL18 (includes EG:16173),IL4 (includes EG:16189),IL6,INPP5D,IRF2,IRF8,ITGB2,LYN,MAPK14,MFGE8,MYD88,NCOA2,NOS2,NR3C1,O3FAR1,P2RX7,PGLYRP1,PRKCE,PROC,PTEN,RAPGEF3,SERPINE1,SOCS1,SPHK1,SPI1 (includes EG:20375),SPON2,TGM2,THBS1,TLR2,TLR3,TLR4,TLR9,TNF,TREM1,TREM2,TRPV2,XBP1 (includes EG:14061…	58
Cancer	myelofibrosis with myeloid metaplasia	myelofibrosis with myeloid metaplasia	2.63E-05			ABL1,BCR,BMP1,BMP6,BMP7,BMPR2,EPHA2,FDFT1,FYN,IRAK2,JAK2,KIT,LCK,MTOR,NFE2,PDGFRA,PDGFRB,PLOD2,RUNX1,SRC,YES1	21
Hematological Disease	myelofibrosis with myeloid metaplasia	myelofibrosis with myeloid metaplasia	2.63E-05			ABL1,BCR,BMP1,BMP6,BMP7,BMPR2,EPHA2,FDFT1,FYN,IRAK2,JAK2,KIT,LCK,MTOR,NFE2,PDGFRA,PDGFRB,PLOD2,RUNX1,SRC,YES1	21
Organismal Injury and Abnormalities	myelofibrosis with myeloid metaplasia	myelofibrosis with myeloid metaplasia	2.63E-05			ABL1,BCR,BMP1,BMP6,BMP7,BMPR2,EPHA2,FDFT1,FYN,IRAK2,JAK2,KIT,LCK,MTOR,NFE2,PDGFRA,PDGFRB,PLOD2,RUNX1,SRC,YES1	21
Cell Signaling	Rho protein signal transduction	Rho protein signal transduction	2.64E-05		0.026	ADRA1B,ADRA2A,ADRB1,ARHGAP1,ARHGAP29,ARHGAP32,ARHGDIB,ARHGDIG,ARHGEF1,ARHGEF11,ARHGEF2,ARHGEF3,ARRB1,BAIAP2,BCL6,CDC42EP1,CDC42EP4,CDC42EP5,CDH13,CDH2,CFL1,CHUK,CNKSR1,COL1A2,CUL3 (includes EG:26554),EDNRA,GNA12,GNA13,KCTD13,KIFAP3,LOC643751,LPAR1,LPAR2,MCF2L,MURC,MYO9B,PECAM1,PTPLAD1,RAC1,RHOA,RHOB,RHOD,RHOG,RHOJ,ROCK1,ROCK2,RTKN,SCAI,SRGAP1,SYNJ2BP,TAX1BP3,TNFAIP1	52
Cell Death	cell death	cell death of embryonic cell lines	2.71E-05		0.685	ABCG2,ADRBK1,AIFM3,APP,ATG5 (includes EG:11793),ATP13A2,ATP1A4,ATP2B2,BAD,BAG4,BCL10,BCL2A1,BCL2L1,BCL6,BECN1,BIRC3,BIRC5,BNIP3,BOK,CALB1,CASP2,CASP3,CASP7,CASP8,CASP9 (includes EG:100140945),CCNE1,CDK2AP1,CFLAR,CHMP5,CNNM4,COX11,CYCS,DAP3,DAXX,DCTN2,DDN,DDX17,DLST,E2F1,E2F6,EIF2AK2,EIF4EBP1,EMP2,EMP3,EPHB2,ERN1,F2,FADD,FAS,FGF1,FGFR4,GNAQ,HIPK2,HSPA5,HSPB1,HTRA2,HTT,IER3,IFNAR1,IGF1R,IGFBP3,IL17…	150
Embryonic Development	cell death	cell death of embryonic cell lines	2.71E-05		0.685	ABCG2,ADRBK1,AIFM3,APP,ATG5 (includes EG:11793),ATP13A2,ATP1A4,ATP2B2,BAD,BAG4,BCL10,BCL2A1,BCL2L1,BCL6,BECN1,BIRC3,BIRC5,BNIP3,BOK,CALB1,CASP2,CASP3,CASP7,CASP8,CASP9 (includes EG:100140945),CCNE1,CDK2AP1,CFLAR,CHMP5,CNNM4,COX11,CYCS,DAP3,DAXX,DCTN2,DDN,DDX17,DLST,E2F1,E2F6,EIF2AK2,EIF4EBP1,EMP2,EMP3,EPHB2,ERN1,F2,FADD,FAS,FGF1,FGFR4,GNAQ,HIPK2,HSPA5,HSPB1,HTRA2,HTT,IER3,IFNAR1,IGF1R,IGFBP3,IL17…	150
Tissue Development	adhesion	adhesion of immune cells	2.72E-05		1.378	A2M,ADAM9,ADORA2A,AGER,AGT,ALOX12,ANGPT1,ANGPT2,APOA4,APOC3,APOE,APOH,APP,ATRN,AXL,B4GALT1,BTK,C5,CBLB,CCL17,CCL20,CCL22,CCL25,CCL28,CCL5,CCNC,CCND1,CD14,CD151,CD200,CD4,CD40,CD46,CD47,CD48,CD58,CD83,CD9,CDH1,CERCAM,CHST4,CMAH,CORO1A,CRP,CSF1 (includes EG:12977),CSF2,CSF2RB,CTTN,CXCL2,CXCR4,ERG,F11R,F2,F2R,FAS,FCGR1A,FGR,FLT1,FUT4,FYB,FYN,GAB2,GAS6,GNAI2,GPR132,HCK,HDAC4,HGF,HIF1A,ICAM1,ICAM3,ICO…	188
Hematological System Development and Function	adhesion	adhesion of immune cells	2.72E-05		1.378	A2M,ADAM9,ADORA2A,AGER,AGT,ALOX12,ANGPT1,ANGPT2,APOA4,APOC3,APOE,APOH,APP,ATRN,AXL,B4GALT1,BTK,C5,CBLB,CCL17,CCL20,CCL22,CCL25,CCL28,CCL5,CCNC,CCND1,CD14,CD151,CD200,CD4,CD40,CD46,CD47,CD48,CD58,CD83,CD9,CDH1,CERCAM,CHST4,CMAH,CORO1A,CRP,CSF1 (includes EG:12977),CSF2,CSF2RB,CTTN,CXCL2,CXCR4,ERG,F11R,F2,F2R,FAS,FCGR1A,FGR,FLT1,FUT4,FYB,FYN,GAB2,GAS6,GNAI2,GPR132,HCK,HDAC4,HGF,HIF1A,ICAM1,ICAM3,ICO…	188
Immune Cell Trafficking	adhesion	adhesion of immune cells	2.72E-05		1.378	A2M,ADAM9,ADORA2A,AGER,AGT,ALOX12,ANGPT1,ANGPT2,APOA4,APOC3,APOE,APOH,APP,ATRN,AXL,B4GALT1,BTK,C5,CBLB,CCL17,CCL20,CCL22,CCL25,CCL28,CCL5,CCNC,CCND1,CD14,CD151,CD200,CD4,CD40,CD46,CD47,CD48,CD58,CD83,CD9,CDH1,CERCAM,CHST4,CMAH,CORO1A,CRP,CSF1 (includes EG:12977),CSF2,CSF2RB,CTTN,CXCL2,CXCR4,ERG,F11R,F2,F2R,FAS,FCGR1A,FGR,FLT1,FUT4,FYB,FYN,GAB2,GAS6,GNAI2,GPR132,HCK,HDAC4,HGF,HIF1A,ICAM1,ICAM3,ICO…	188
Cell-To-Cell Signaling and Interaction	adhesion	adhesion of immune cells	2.72E-05		1.378	A2M,ADAM9,ADORA2A,AGER,AGT,ALOX12,ANGPT1,ANGPT2,APOA4,APOC3,APOE,APOH,APP,ATRN,AXL,B4GALT1,BTK,C5,CBLB,CCL17,CCL20,CCL22,CCL25,CCL28,CCL5,CCNC,CCND1,CD14,CD151,CD200,CD4,CD40,CD46,CD47,CD48,CD58,CD83,CD9,CDH1,CERCAM,CHST4,CMAH,CORO1A,CRP,CSF1 (includes EG:12977),CSF2,CSF2RB,CTTN,CXCL2,CXCR4,ERG,F11R,F2,F2R,FAS,FCGR1A,FGR,FLT1,FUT4,FYB,FYN,GAB2,GAS6,GNAI2,GPR132,HCK,HDAC4,HGF,HIF1A,ICAM1,ICAM3,ICO…	188
Cellular Movement	migration	migration of vascular smooth muscle cells	2.73E-05		0.709	ADM,AGER,AGT,BMP2,BMPR2,CALCRL,CLIC4,COMP,CSF2,CYP2J2,F2,FBLN5,FGF2,FGFR1,FOXO4,GIT1 (includes EG:216963),IGFBP2,IGFBP4,IGFBP5,IL1A,IL1B,IL6,ITGB5,LTA,NFE2L2,NOX1,NQO1,PDGFRB,PLAUR,POLDIP2,PTPRF,RAC1,RAMP2,RAMP3,S100A4,SDC4,TNF	37
Skeletal and Muscular System Development and Function	migration	migration of vascular smooth muscle cells	2.73E-05		0.709	ADM,AGER,AGT,BMP2,BMPR2,CALCRL,CLIC4,COMP,CSF2,CYP2J2,F2,FBLN5,FGF2,FGFR1,FOXO4,GIT1 (includes EG:216963),IGFBP2,IGFBP4,IGFBP5,IL1A,IL1B,IL6,ITGB5,LTA,NFE2L2,NOX1,NQO1,PDGFRB,PLAUR,POLDIP2,PTPRF,RAC1,RAMP2,RAMP3,S100A4,SDC4,TNF	37
Cancer	tumorigenesis	tumorigenesis of organ	2.77E-05		-0.522	AGER,AHR,AKAP12,Alox12e,APC,APOE,AR,ATM,BIRC5,BMPR1A,BRCA1,C3,CASP2,CAV1,CCNA2,CCND1,CCND2,CCNE1,CDC25A,CDC25B,CDC37,CDH1,CDK2,CDK4,CDKN1A,CDKN1B,CDKN1C,CDKN2C,CDKN2D,COL18A1,CSF1 (includes EG:12977),CSNK2A2,CTNNB1,CTSL2,CYP19A1,CYP1B1,DNMT1,E2F1,EDNRB,EIF4E,EPHA2,EPHX1,ERCC6,ESR2,FGF8,FOS,FST,FSTL3,FUS,GADD45A,GCK,GHRHR,GJB1,GLI1,GRP,HBEGF,HGF,HNF1A,HSD11B1,HSD11B2,ICOSLG,IFT88,IKBKB,IL27RA,IL6,…	153
Cell Cycle	cell cycle progression	cell cycle progression of tumor cell lines	2.78E-05		-0.864	ABL1,ADRA1B,AHR,APBB1,APBB2,APBB3,AR,ARG1,ATR,AURKA,BANP,BCAR1,BCL2A1,BCL6,BCR,BIRC5,BMP4,BRCA1,C15orf63,CALCB,CAMK2N2,CARD10,CASP2,CAV1,CCNA2,CCND1,CCNE1,CCNG2,CDC25B,CDC25C,CDC27,CDK2,CDK4,CDK6,CDKN1A,CDKN1B,CDKN2C,CHUK,CKAP2,CLSPN,CSE1L,CSF2,CSNK2A1,CSNK2A2,CUL7,DIABLO,DNAJB4,DUSP1,E2F1,E2F2,EGFR,EGR1,EHF,EIF4E,EPO,EZH2,FLT3LG,FOXM1,FOXO3,GAL,GALR2,HBEGF,HERC2,HGF,HIF1A,HMOX1,HPGD,IER3,IGFBP3,…	139
Molecular Transport	uptake	uptake of D-glucose	2.78E-05		-1.176	ACSL1,AKT2,ALB,APOA1,APP,APPL1,ASPSCR1,BDKRB2,C1QL3,CAV3,CD36,CPT1C,CRAT,CSF1 (includes EG:12977),CSF1R,CTF1,EGR1,ELK1,ERBB3,FABP3,FGF21,GGPS1,GSK3A,H6PD,HFE,IL4 (includes EG:16189),IL7,INSR,INSRR,IRS1,KCNC1,KLF15,LNPEP,LPL,MAPK9,MIF,MTM1,MTOR,MYC,MYO1C,MYO5A,NOS3,NPC2 (includes EG:10577),PARD3,PEA15,PIK3C2A,PIK3CB,PIK3CG,PLAU,PLAUR,PLD1,PPARA,PPARG,PPM1A,PRKAA2,PRKCA,PRKCD,PRKCZ,PRKD3,PTEN,PTPN1…	78
Carbohydrate Metabolism	uptake	uptake of D-glucose	2.78E-05		-1.176	ACSL1,AKT2,ALB,APOA1,APP,APPL1,ASPSCR1,BDKRB2,C1QL3,CAV3,CD36,CPT1C,CRAT,CSF1 (includes EG:12977),CSF1R,CTF1,EGR1,ELK1,ERBB3,FABP3,FGF21,GGPS1,GSK3A,H6PD,HFE,IL4 (includes EG:16189),IL7,INSR,INSRR,IRS1,KCNC1,KLF15,LNPEP,LPL,MAPK9,MIF,MTM1,MTOR,MYC,MYO1C,MYO5A,NOS3,NPC2 (includes EG:10577),PARD3,PEA15,PIK3C2A,PIK3CB,PIK3CG,PLAU,PLAUR,PLD1,PPARA,PPARG,PPM1A,PRKAA2,PRKCA,PRKCD,PRKCZ,PRKD3,PTEN,PTPN1…	78
Small Molecule Biochemistry	uptake	uptake of D-glucose	2.78E-05		-1.176	ACSL1,AKT2,ALB,APOA1,APP,APPL1,ASPSCR1,BDKRB2,C1QL3,CAV3,CD36,CPT1C,CRAT,CSF1 (includes EG:12977),CSF1R,CTF1,EGR1,ELK1,ERBB3,FABP3,FGF21,GGPS1,GSK3A,H6PD,HFE,IL4 (includes EG:16189),IL7,INSR,INSRR,IRS1,KCNC1,KLF15,LNPEP,LPL,MAPK9,MIF,MTM1,MTOR,MYC,MYO1C,MYO5A,NOS3,NPC2 (includes EG:10577),PARD3,PEA15,PIK3C2A,PIK3CB,PIK3CG,PLAU,PLAUR,PLD1,PPARA,PPARG,PPM1A,PRKAA2,PRKCA,PRKCD,PRKCZ,PRKD3,PTEN,PTPN1…	78
Gastrointestinal Disease	experimentally-induced diabetes	experimentally-induced diabetes	2.79E-05			A2M,ABCD3,AGER,AGT,ALOX12,ANXA5,AQP1,ATP1A2,BTG2,C1S,C2,C3,CALB1,CASP3,CCND2,CD200,CEBPD,CNGB1,COL4A1,CP,CSDA,DDAH1,DUSP1,EEF2,EXOC7,FGFR1,GAL,GBP2 (includes EG:14469),GFAP,HES1 (includes EG:15205),HES5,HMGCL,HMGCS2,HSF1 (includes EG:15499),HSPB1,ICAM1,ID1,IFITM3,IGFBP2,IL1B,JUN,KLF4,LCN2,LGALS3,MCHR1,MT1E,MYC,NFKB1,NSF,OPN1SW,PDE1B,PDLIM4,PPAP2B,PRKCA,PRKCB,PRKCD,PRKCE,PTPN1,RGS1,RHOB,RSAD2,S100…	69
Metabolic Disease	experimentally-induced diabetes	experimentally-induced diabetes	2.79E-05			A2M,ABCD3,AGER,AGT,ALOX12,ANXA5,AQP1,ATP1A2,BTG2,C1S,C2,C3,CALB1,CASP3,CCND2,CD200,CEBPD,CNGB1,COL4A1,CP,CSDA,DDAH1,DUSP1,EEF2,EXOC7,FGFR1,GAL,GBP2 (includes EG:14469),GFAP,HES1 (includes EG:15205),HES5,HMGCL,HMGCS2,HSF1 (includes EG:15499),HSPB1,ICAM1,ID1,IFITM3,IGFBP2,IL1B,JUN,KLF4,LCN2,LGALS3,MCHR1,MT1E,MYC,NFKB1,NSF,OPN1SW,PDE1B,PDLIM4,PPAP2B,PRKCA,PRKCB,PRKCD,PRKCE,PTPN1,RGS1,RHOB,RSAD2,S100…	69
Endocrine System Disorders	experimentally-induced diabetes	experimentally-induced diabetes	2.79E-05			A2M,ABCD3,AGER,AGT,ALOX12,ANXA5,AQP1,ATP1A2,BTG2,C1S,C2,C3,CALB1,CASP3,CCND2,CD200,CEBPD,CNGB1,COL4A1,CP,CSDA,DDAH1,DUSP1,EEF2,EXOC7,FGFR1,GAL,GBP2 (includes EG:14469),GFAP,HES1 (includes EG:15205),HES5,HMGCL,HMGCS2,HSF1 (includes EG:15499),HSPB1,ICAM1,ID1,IFITM3,IGFBP2,IL1B,JUN,KLF4,LCN2,LGALS3,MCHR1,MT1E,MYC,NFKB1,NSF,OPN1SW,PDE1B,PDLIM4,PPAP2B,PRKCA,PRKCB,PRKCD,PRKCE,PTPN1,RGS1,RHOB,RSAD2,S100…	69
Cell Death	apoptosis	apoptosis of tumor cells	2.89E-05		1.135	ABL1,AGAP2,AIMP1,AKT1S1,AKT2,ALB,ANGPTL1,ANPEP,AR,ATF2,ATM,B4GALT5,BAD,BCL2L1,BCL2L2,BIRC5,BOK,BRCA1,CASP2,CASP3,CASP8,CASP9 (includes EG:100140945),CAT,CCND3,CD40,CDC25B,CDC45,CDC6 (includes EG:23834),CDH1,CDK2,CDKN1A,CDKN1B,CFLAR,CLU,COL18A1,CSF2,CTSB,DAXX,DDIT3,DIABLO,DNMT3B,EGFR,ENO1,ETS1,F2,FADD,FAS,FHIT,FLT1,FOXO1 (includes EG:2308),FOXO4,GAB2,GADD45A,GLI1,GNB2L1,GSK3B,HBEGF,HIF1A,HIPK2,HSP…	123
Cell Death	necrosis	necrosis	3.01E-05		-0.496	ABCE1,ABL1,ADA,ADM,AGER,AGT,AHR,AKT2,AKT3 (includes EG:10000),ALB,APOE,APP,APRT,ARNT,ATP6AP2,ATP6V1G2,B4GALNT1,BAK1,BCL2A1,BCL2L1,BMF,C1orf159,C5,CACNB2,CAMP,CASP2,CASP3,CASP8,CAT,CD14,CDC37,CDKN1A,CES1,CLU,COMMD4,CREBL2,CRYAB,CTSB,CTSD,CWC15 (includes EG:300361),CYLD,DPYSL4,EGR1,EPHX1,EPO,ERBB3,FADD,FAS,FGFR1,FGL2,FLT1,FLT3,FOXI1,GABRA5,GABRP,GALNT5,GPR152,GRB2,GRID2,GSTZ1,HADHA,HGF,HOXA3,HOXA7,…	174
Organismal Injury and Abnormalities	development	development of lesion	3.05E-05		0.822	ALOX15,APOA2,APOE,ARRB2,B4GALT1,BMX,CAV1,CDKN1A,CDKN1B,CTSS,DHH,DLL4,EFS,GRIP1,ITGB3,LCAT,LDLR,LGALS1,LGALS3,MAP3K1,MMP9,NOS2,PDCD1,PLAU,PLAUR,PLG,PTEN,SMAD3,SMAD7,SREBF1,TNFRSF1A,VCAM1	32
Molecular Transport	export	export of mRNA	3.05E-05		-1.355	AGFG1,ALB,DDX19B,DDX25,DDX39A,DDX39B,EIF4E,EIF5A,FYTTD1,GLE1 (includes EG:2733),HHEX,NCBP1,NUP107,NUP133 (includes EG:234865),NUP160,NUP214,NUP98,NXF1,NXT1,RAE1,SMG1,SMG5,SMG6,SMG7,THOC1,THOC2,THOC4,THOC5,THOC6,UPF1,UPF2,XPO1	32
RNA Trafficking	export	export of mRNA	3.05E-05		-1.355	AGFG1,ALB,DDX19B,DDX25,DDX39A,DDX39B,EIF4E,EIF5A,FYTTD1,GLE1 (includes EG:2733),HHEX,NCBP1,NUP107,NUP133 (includes EG:234865),NUP160,NUP214,NUP98,NXF1,NXT1,RAE1,SMG1,SMG5,SMG6,SMG7,THOC1,THOC2,THOC4,THOC5,THOC6,UPF1,UPF2,XPO1	32
Gene Expression	expression	expression of mRNA	3.14E-05		0.262	ACO1,AHR,ALB,APP,ATM,BACH2,BMP2,BMP4,BMPR2,BRF1 (includes EG:2972),CALR,CBL,CD47,COL1A1,CPEB1,CTGF,CTIF,DARS,DDIT3,DDX25,DHPS,EGFR,EIF2A,EIF2AK1,EIF2AK2,EIF2AK3,EIF2AK4,EIF2B1,EIF2B2,EIF2B3,EIF2B4,EIF2B5,EIF2C2,EIF2S2,EIF2S3,EIF3B,EIF3D,EIF3E,EIF3F,EIF3G,EIF3H,EIF3I,EIF3K,EIF3L,EIF4A3,EIF4B,EIF4E,EIF4EBP1,EIF4EBP2,EIF4G2,EIF4G3,EIF5,ELK1,ESR2,ESRRG,EWSR1,FAS,FGF1,FGF2,FGFR2,FLI1,FMR1,FOS,FOXO1 (i…	154
Cellular Growth and Proliferation	proliferation	proliferation of lymphatic system cells	3.18E-05		-0.301	ACHE,APP,ATM,BCL2L1,BMP2,BTK,CBFB,CCL20,CCND2,CD180,CD4,CD40,CD80 (includes EG:12519),CD86,CD8A,CDKN1A,CDKN1B,CHRNA1,CISH,CSF2,CTNNB1,CYSLTR2,EDN1,EDNRB,EPO,F2,F2R,FGF1,FGF2,FGFR3,FLT3LG,HGF,HPRT1,IGFBP3,IL12RB2,IL15 (includes EG:16168),IL18 (includes EG:16173),IL1B,IL27,IL2RG,IL4 (includes EG:16189),IL6,IMPDH1,IMPDH2,INCA1,INPP5D,IRF8,ITGA1,JUNB,KDR,KIT,KITLG,LOX,LTB4R,MAFG,MAP3K3,MAPK14,MEIS1,M…	88
Lymphoid Tissue Structure and Development	proliferation	proliferation of lymphatic system cells	3.18E-05		-0.301	ACHE,APP,ATM,BCL2L1,BMP2,BTK,CBFB,CCL20,CCND2,CD180,CD4,CD40,CD80 (includes EG:12519),CD86,CD8A,CDKN1A,CDKN1B,CHRNA1,CISH,CSF2,CTNNB1,CYSLTR2,EDN1,EDNRB,EPO,F2,F2R,FGF1,FGF2,FGFR3,FLT3LG,HGF,HPRT1,IGFBP3,IL12RB2,IL15 (includes EG:16168),IL18 (includes EG:16173),IL1B,IL27,IL2RG,IL4 (includes EG:16189),IL6,IMPDH1,IMPDH2,INCA1,INPP5D,IRF8,ITGA1,JUNB,KDR,KIT,KITLG,LOX,LTB4R,MAFG,MAP3K3,MAPK14,MEIS1,M…	88
Cancer	acute myeloid leukemia	acute myeloid leukemia	3.20E-05		-0.657	ABCB1,ABCC1,ABCG2,ABL1,ADORA2A,AMY2A,ASXL1,AURKA,AURKB,BAALC,BCR,BRAF,CBFB,CBL,CD80 (includes EG:12519),CD86,CDKN2B,CHIC2,CSF1R,CSF2RB,CUX1,CUX2,CXCR4,CYP3A4,DCK,DPP4,E2F1,E2F3,EGFR,EPHA2,EPHX1,EPO,ERCC2,ERG,ETV6,EZH2,FGFR1,FGFR3,FKBP1A,FLT1,FLT3,FNTA,FNTB,FOXP1,FYN,GATA1,GMPS,GSTM1,GSTP1,HDAC1,HDAC3,HLX,HOXB3,HPRT1,HTR3E,IDH1,IDH2,IL1B,IL2RA,IL2RB,IL2RG,IMPDH1,IMPDH2,INCA1,INPP5D,JAK2,KDR,KIT,KR…	121
Genetic Disorder	acute myeloid leukemia	acute myeloid leukemia	3.20E-05		-0.657	ABCB1,ABCC1,ABCG2,ABL1,ADORA2A,AMY2A,ASXL1,AURKA,AURKB,BAALC,BCR,BRAF,CBFB,CBL,CD80 (includes EG:12519),CD86,CDKN2B,CHIC2,CSF1R,CSF2RB,CUX1,CUX2,CXCR4,CYP3A4,DCK,DPP4,E2F1,E2F3,EGFR,EPHA2,EPHX1,EPO,ERCC2,ERG,ETV6,EZH2,FGFR1,FGFR3,FKBP1A,FLT1,FLT3,FNTA,FNTB,FOXP1,FYN,GATA1,GMPS,GSTM1,GSTP1,HDAC1,HDAC3,HLX,HOXB3,HPRT1,HTR3E,IDH1,IDH2,IL1B,IL2RA,IL2RB,IL2RG,IMPDH1,IMPDH2,INCA1,INPP5D,JAK2,KDR,KIT,KR…	121
Hematological Disease	acute myeloid leukemia	acute myeloid leukemia	3.20E-05		-0.657	ABCB1,ABCC1,ABCG2,ABL1,ADORA2A,AMY2A,ASXL1,AURKA,AURKB,BAALC,BCR,BRAF,CBFB,CBL,CD80 (includes EG:12519),CD86,CDKN2B,CHIC2,CSF1R,CSF2RB,CUX1,CUX2,CXCR4,CYP3A4,DCK,DPP4,E2F1,E2F3,EGFR,EPHA2,EPHX1,EPO,ERCC2,ERG,ETV6,EZH2,FGFR1,FGFR3,FKBP1A,FLT1,FLT3,FNTA,FNTB,FOXP1,FYN,GATA1,GMPS,GSTM1,GSTP1,HDAC1,HDAC3,HLX,HOXB3,HPRT1,HTR3E,IDH1,IDH2,IL1B,IL2RA,IL2RB,IL2RG,IMPDH1,IMPDH2,INCA1,INPP5D,JAK2,KDR,KIT,KR…	121
Tissue Development	development	development of cardiovascular tissue	3.30E-05		-0.098	ACTC1,ADAM15,ADAMTS1,ADAMTS8,ADM,ADRA2B,AGGF1,AIMP1,ANG,ANGPT2,ANGPTL1,ANGPTL4,ANKRD1,ANPEP,APOA1,APOE,APOH,ARG1,ARHGAP24,ATP5A1,ATPIF1,AXL,BMP2,BMP4,BMP6,BMP7,BMPR2,C3,CALR,CAV1,CAV2,CCM2,CD36,CDH13,CDH2,COL11A1,COL18A1,COL4A1,COL4A2,COL4A3,COMP,CSF1 (includes EG:12977),CSF1R,CSRP3,CXCL2,CYBA,DLL4,ECM1 (includes EG:100332249),EDN1,EDNRB,EFNB2,EGR3,ENG,EPHB4,EPO,ERAP1,F11R,FGF1,FGF13,FGF2,FGFR2,F…	166
Cellular Assembly and Organization	outgrowth	outgrowth of plasma membrane projections	3.36E-05	Increased	3.116	A2M,ADAM10,ADAM17,ADORA2A,ALS2,ANP32A,APOE,APP,AR,ARG1,ARHGAP17,ARHGAP32,ARHGEF25,BAIAP2,BASP1,BCAN,BDNF,BMP2,BMP4,BTG3,CAT,CD9,CDH2,CDK1,CDK2,CDK5,CDK5R2,CNPY2,CREB1,CSF1 (includes EG:12977),CSNK1D,CXCL9,DNAJA3,DOK4,DPYSL2,DVL1,E2F1,EFNB1,EFNB2,EFNB3,EGFR,ELK1,ELMO2,EPHB2,EXOC7,EXT1,F2,FAIM,FEZ1,FGF1,FGF18,FGF2,FGF7,FGFR1,FGFR3,FGFR4,FKBP4,FRK,GAB1,GAL,GAS7,GDNF,GFAP,GFRA2,GJA1,GJB1,GPR3,HDGFRP3…	178
Cell Morphology	outgrowth	outgrowth of plasma membrane projections	3.36E-05	Increased	3.116	A2M,ADAM10,ADAM17,ADORA2A,ALS2,ANP32A,APOE,APP,AR,ARG1,ARHGAP17,ARHGAP32,ARHGEF25,BAIAP2,BASP1,BCAN,BDNF,BMP2,BMP4,BTG3,CAT,CD9,CDH2,CDK1,CDK2,CDK5,CDK5R2,CNPY2,CREB1,CSF1 (includes EG:12977),CSNK1D,CXCL9,DNAJA3,DOK4,DPYSL2,DVL1,E2F1,EFNB1,EFNB2,EFNB3,EGFR,ELK1,ELMO2,EPHB2,EXOC7,EXT1,F2,FAIM,FEZ1,FGF1,FGF18,FGF2,FGF7,FGFR1,FGFR3,FGFR4,FKBP4,FRK,GAB1,GAL,GAS7,GDNF,GFAP,GFRA2,GJA1,GJB1,GPR3,HDGFRP3…	178
Cellular Assembly and Organization	assembly	assembly of cellular protrusions	3.43E-05		-1.709	ACTN2,ACTR3,AQP1,ARAP1,ARFIP2,ARHGEF4,B9D2,BBS10,BBS4,BBS5,CAPG,CAPZB,CAST,CBY1,CCDC88A,CCR7,CDH13,CYFIP1,DNAI2,DYNC2H1,DYNC2LI1,E2F4,FGD1,FGD4,FOPNL,FOXJ1,IFT20,ITGA6,ITGB4,JUB,KIF27,KLF5,LAMA5,LOC643751,LRRC16A,MKKS,MTOR,MYO1A,NCK1,NCK2,NUP85 (includes EG:287830),PALM,PCM1,PDGFA,PODXL,PRKCQ,PXN,RAB3IP,RAB8A,RAC1,RAC2,RAC3,RALA,RDX,RHOQ,RPGRIP1L,SH2B1,SLIT2,SPAG16,SPATA13,SRF,STK36,TGFB3,TGFBR1,…	72
Cellular Function and Maintenance	assembly	assembly of cellular protrusions	3.43E-05		-1.709	ACTN2,ACTR3,AQP1,ARAP1,ARFIP2,ARHGEF4,B9D2,BBS10,BBS4,BBS5,CAPG,CAPZB,CAST,CBY1,CCDC88A,CCR7,CDH13,CYFIP1,DNAI2,DYNC2H1,DYNC2LI1,E2F4,FGD1,FGD4,FOPNL,FOXJ1,IFT20,ITGA6,ITGB4,JUB,KIF27,KLF5,LAMA5,LOC643751,LRRC16A,MKKS,MTOR,MYO1A,NCK1,NCK2,NUP85 (includes EG:287830),PALM,PCM1,PDGFA,PODXL,PRKCQ,PXN,RAB3IP,RAB8A,RAC1,RAC2,RAC3,RALA,RDX,RHOQ,RPGRIP1L,SH2B1,SLIT2,SPAG16,SPATA13,SRF,STK36,TGFB3,TGFBR1,…	72
Cellular Assembly and Organization	growth	growth of neurites	3.50E-05	Increased	2.826	A2M,ABL1,ADAM10,ADAM17,ADORA2A,ALS2,ANP32A,APOE,APP,AR,ARG1,ARHGAP17,ARHGAP32,ARHGEF25,BAIAP2,BASP1,BCAN,BCR,BDNF,BMP2,BMP4,BMP7,BTG3,CACNA1A,CAT,CD9,CDH2,CDK1,CDK2,CDK5,CDK5R1,CDK5R2,CNPY2,CREB1,CSF1 (includes EG:12977),CSNK1D,CXCL9,CYP19A1,DIXDC1,DNAJA3,DOK4,DPYSL2,DVL1,E2F1,EFNA1,EFNB1,EFNB2,EFNB3,EGFR,EIF4EBP1,ELK1,ELMO2,EPHB2,EPHB3,EXOC7,EXT1,F2,FAIM,FAS,FEZ1,FGF1,FGF18,FGF2,FGF7,FGFR1,FGFR3…	209
Nervous System Development and Function	growth	growth of neurites	3.50E-05	Increased	2.826	A2M,ABL1,ADAM10,ADAM17,ADORA2A,ALS2,ANP32A,APOE,APP,AR,ARG1,ARHGAP17,ARHGAP32,ARHGEF25,BAIAP2,BASP1,BCAN,BCR,BDNF,BMP2,BMP4,BMP7,BTG3,CACNA1A,CAT,CD9,CDH2,CDK1,CDK2,CDK5,CDK5R1,CDK5R2,CNPY2,CREB1,CSF1 (includes EG:12977),CSNK1D,CXCL9,CYP19A1,DIXDC1,DNAJA3,DOK4,DPYSL2,DVL1,E2F1,EFNA1,EFNB1,EFNB2,EFNB3,EGFR,EIF4EBP1,ELK1,ELMO2,EPHB2,EPHB3,EXOC7,EXT1,F2,FAIM,FAS,FEZ1,FGF1,FGF18,FGF2,FGF7,FGFR1,FGFR3…	209
Cell Death	apoptosis	apoptosis of embryonic cell lines	3.71E-05		0.669	ADRBK1,AIFM3,APP,ATP2B2,BAD,BCL10,BCL2A1,BCL2L1,BCL6,BIRC3,BIRC5,BOK,CALB1,CASP2,CASP3,CASP8,CASP9 (includes EG:100140945),CCNE1,CDK2AP1,CFLAR,CHMP5,CYCS,DAP3,DAXX,DDN,DDX17,E2F1,E2F6,EIF2AK2,EIF4EBP1,F2,FADD,FAS,FGF1,FGFR4,GNAQ,HIPK2,HSPA5,HTT,IER3,IGFBP3,IL17RD,IL24,IPPK,IRS1,ITCH,ITGAV,ITGB1,KRAS,LYN,MAP2K4,MAP2K6,MAP3K5,MAP3K8,MAPK8,MCL1,MTF1 (includes EG:17764),MZB1,NF2,NLRC4,NOS2,NRGN,P2RX7…	114
Embryonic Development	apoptosis	apoptosis of embryonic cell lines	3.71E-05		0.669	ADRBK1,AIFM3,APP,ATP2B2,BAD,BCL10,BCL2A1,BCL2L1,BCL6,BIRC3,BIRC5,BOK,CALB1,CASP2,CASP3,CASP8,CASP9 (includes EG:100140945),CCNE1,CDK2AP1,CFLAR,CHMP5,CYCS,DAP3,DAXX,DDN,DDX17,E2F1,E2F6,EIF2AK2,EIF4EBP1,F2,FADD,FAS,FGF1,FGFR4,GNAQ,HIPK2,HSPA5,HTT,IER3,IGFBP3,IL17RD,IL24,IPPK,IRS1,ITCH,ITGAV,ITGB1,KRAS,LYN,MAP2K4,MAP2K6,MAP3K5,MAP3K8,MAPK8,MCL1,MTF1 (includes EG:17764),MZB1,NF2,NLRC4,NOS2,NRGN,P2RX7…	114
Cell Death	apoptosis	apoptosis of embryonic cells	3.77E-05		-1.165	APC,ATF1 (includes EG:100040260),ATM,ATP2C1,BCAP31,BLM,BMP4,BMP7,BMPR1A,BMPR1B,CASP3,CREB1,CTNNB1,DNMT3A,DNMT3B,EIF2C1,EIF2C2,EIF2C3,EIF2C4,ETS1,ETV6,EYA1,FAS,FOXP1,HIF1A,HMGA1,HTT,ITGA5,ITGAV,JAG2,LIMS3L,MAP2K4,MAP3K1,MSX1,MSX2,NKX2-5,NOS2,NRP1 (includes EG:18186),PIAS2,PIK3R1,PLCD3,PRPF19,PTHLH,RAC1,RAD9A,RB1,SALL1,SIX1,SKI,SLC2A1,SMO,SRF,TNF,TNFRSF6B,TP53 (includes EG:22059)	55
Embryonic Development	apoptosis	apoptosis of embryonic cells	3.77E-05		-1.165	APC,ATF1 (includes EG:100040260),ATM,ATP2C1,BCAP31,BLM,BMP4,BMP7,BMPR1A,BMPR1B,CASP3,CREB1,CTNNB1,DNMT3A,DNMT3B,EIF2C1,EIF2C2,EIF2C3,EIF2C4,ETS1,ETV6,EYA1,FAS,FOXP1,HIF1A,HMGA1,HTT,ITGA5,ITGAV,JAG2,LIMS3L,MAP2K4,MAP3K1,MSX1,MSX2,NKX2-5,NOS2,NRP1 (includes EG:18186),PIAS2,PIK3R1,PLCD3,PRPF19,PTHLH,RAC1,RAD9A,RB1,SALL1,SIX1,SKI,SLC2A1,SMO,SRF,TNF,TNFRSF6B,TP53 (includes EG:22059)	55
Small Molecule Biochemistry	metabolism	metabolism of purine nucleotide	3.77E-05			ABCC1,ABCG5,ACLY,ACTC1,ADSL,ADSSL1,AK2,AK3,AMPD3,ATP1A1,ATP1A2,ATP2B2,ATP5A1,ATP5B,ATP5C1,ATP5D,ATP5F1,ATP5G1,ATP5H,ATP5J,ATP5L,ATP5O,ATP6V1E1,ATP6V1E2,ATP6V1G2,ATP7A,BAD,BLM,CBS,CHD1L,CTNS,CYB5R4,DDX25,DLST,DNA2,DPM1 (includes EG:13480),ENTPD1,ERCC3,FMO2,GCK,GMDS,GPD1,GPD2,GUK1,H6PD,IDE,IDH3A,IDH3B,IDH3G,INO80 (includes EG:296084),KATNA1,LONP1,MDH1,MSH2,MSH6,MYH7,MYO9B,NDUFS1,NSF,NT5E,NUDT1,NUDT…	84
Nucleic Acid Metabolism	metabolism	metabolism of purine nucleotide	3.77E-05			ABCC1,ABCG5,ACLY,ACTC1,ADSL,ADSSL1,AK2,AK3,AMPD3,ATP1A1,ATP1A2,ATP2B2,ATP5A1,ATP5B,ATP5C1,ATP5D,ATP5F1,ATP5G1,ATP5H,ATP5J,ATP5L,ATP5O,ATP6V1E1,ATP6V1E2,ATP6V1G2,ATP7A,BAD,BLM,CBS,CHD1L,CTNS,CYB5R4,DDX25,DLST,DNA2,DPM1 (includes EG:13480),ENTPD1,ERCC3,FMO2,GCK,GMDS,GPD1,GPD2,GUK1,H6PD,IDE,IDH3A,IDH3B,IDH3G,INO80 (includes EG:296084),KATNA1,LONP1,MDH1,MSH2,MSH6,MYH7,MYO9B,NDUFS1,NSF,NT5E,NUDT1,NUDT…	84
Developmental Disorder	hypertrophy	hypertrophy of muscle cells	3.82E-05		1.954	ADRB1,ADRB2,AGT,ALOX15,ANGPT2,AR,BMX,CACNA1H,CAMK2D,CAT,CAV1,CAV3,CDKN1B,CRYAB,CSRP3,CTF1,DICER1,DUSP1,DYRK1A,EDN1,FBXO32,FOXO3,FSTL3,GLRX3,GNAQ,GSK3B,H2AFZ,HBEGF,HDAC2,HDAC5,HDAC9,HSPB8,IL18 (includes EG:16173),INHBA,JAK2,LIF,MAP2K3,MAP2K4,MAP2K6,MAP2K7,MAP3K7 (includes EG:172842),MAPK14,MAPK7,MAPK8,MMP1 (includes EG:300339),MMP9,MTOR,MYBPC3,NCF1,NOS3,NPPA,OSM,PLAU,PLCB1,PLCE1,PPP3CA,PPP3R1,PRDX…	77
Skeletal and Muscular Disorders	hypertrophy	hypertrophy of muscle cells	3.82E-05		1.954	ADRB1,ADRB2,AGT,ALOX15,ANGPT2,AR,BMX,CACNA1H,CAMK2D,CAT,CAV1,CAV3,CDKN1B,CRYAB,CSRP3,CTF1,DICER1,DUSP1,DYRK1A,EDN1,FBXO32,FOXO3,FSTL3,GLRX3,GNAQ,GSK3B,H2AFZ,HBEGF,HDAC2,HDAC5,HDAC9,HSPB8,IL18 (includes EG:16173),INHBA,JAK2,LIF,MAP2K3,MAP2K4,MAP2K6,MAP2K7,MAP3K7 (includes EG:172842),MAPK14,MAPK7,MAPK8,MMP1 (includes EG:300339),MMP9,MTOR,MYBPC3,NCF1,NOS3,NPPA,OSM,PLAU,PLCB1,PLCE1,PPP3CA,PPP3R1,PRDX…	77
Cell Death	apoptosis	apoptosis of lung cancer cell lines	3.85E-05		0.272	ABCC1,AIFM1,AKT2,AKT3 (includes EG:10000),AP2A2,ARL11,AXIN1,BAK1,BCL2L1,BIRC3,BIRC5,BOK,CACNA2D2,CAMP,CASP2,CASP3,CASP8,CASP9 (includes EG:100140945),CDKN1A,CDKN1B,CDKN1C,CDKN2C,CFLAR,COL4A1,COL4A2,COX5A (includes EG:12858),CREB1,DAPK3,DUSP1,E2F1,ELL,EPHA2,ERBB3,FAS,FGF2,FHIT,FOXO3,G0S2,GADD45A,GADD45B,GLIPR1,HIPK2,HSF1 (includes EG:15499),HTATIP2,ID3 (includes EG:15903),IGF2,IGFBP3,IGFBP6,JAG1,K…	109
Cell Death	apoptosis	apoptosis of macrophages	3.88E-05		-0.988	ABCG1,APOE,BCL2L1,BIRC3,C1QA,CASP3,CASP4,CASP8,CCL5,CDKN1A,CFLAR,CSF1 (includes EG:12977),CSF2,DDIT3,DFFA,FAS,GPR132,HIF1A,INPP5D,IRF2,IRF3,LCN2,LDLR,LGALS3,MAP2K3,MAPK14,MAPK9,MCL1,MIF,MTOR,MYD88,NFE2L2,NGF,NPC1,PARP1,PIK3AP1,PLA2G4A,PPARG,PTEN,RIPK1,SOAT1,SOD2,TICAM1,TICAM2,TLR2,TLR4,TNF,TNFRSF1A,TNFRSF1B,TNFSF10,TP53 (includes EG:22059)	51
Cell Cycle	senescence	senescence of fibroblast cell lines	3.88E-05		0.181	AHCY,AKR1B1,ATM,BCL2L12,BCL6,BRD7,BRF1 (includes EG:2972),BUB1 (includes EG:100307076),BUB3 (includes EG:12237),CAV1,CDC14B,CDK2,CDK4,CDKN1A,CIRBP,COPS2,CPEB1,DDB2,DICER1,DMTF1,DUSP1,EGR1,EWSR1,FOXM1,ID1,IL6,KDM2B,KRAS,KSR1,MAP2K7,MAPK12,MAPK14,MYC,NRAS,NUDT1,POT1,PSMB5,PTTG1,RAE1,RB1,RBL1,RBL2 (includes EG:100331892),SIRT1,TCF3,TERT,TP53 (includes EG:22059),TP73,UQCRFS1,VHL	49
Cellular Development	senescence	senescence of fibroblast cell lines	3.88E-05		0.181	AHCY,AKR1B1,ATM,BCL2L12,BCL6,BRD7,BRF1 (includes EG:2972),BUB1 (includes EG:100307076),BUB3 (includes EG:12237),CAV1,CDC14B,CDK2,CDK4,CDKN1A,CIRBP,COPS2,CPEB1,DDB2,DICER1,DMTF1,DUSP1,EGR1,EWSR1,FOXM1,ID1,IL6,KDM2B,KRAS,KSR1,MAP2K7,MAPK12,MAPK14,MYC,NRAS,NUDT1,POT1,PSMB5,PTTG1,RAE1,RB1,RBL1,RBL2 (includes EG:100331892),SIRT1,TCF3,TERT,TP53 (includes EG:22059),TP73,UQCRFS1,VHL	49
Connective Tissue Development and Function	senescence	senescence of fibroblast cell lines	3.88E-05		0.181	AHCY,AKR1B1,ATM,BCL2L12,BCL6,BRD7,BRF1 (includes EG:2972),BUB1 (includes EG:100307076),BUB3 (includes EG:12237),CAV1,CDC14B,CDK2,CDK4,CDKN1A,CIRBP,COPS2,CPEB1,DDB2,DICER1,DMTF1,DUSP1,EGR1,EWSR1,FOXM1,ID1,IL6,KDM2B,KRAS,KSR1,MAP2K7,MAPK12,MAPK14,MYC,NRAS,NUDT1,POT1,PSMB5,PTTG1,RAE1,RB1,RBL1,RBL2 (includes EG:100331892),SIRT1,TCF3,TERT,TP53 (includes EG:22059),TP73,UQCRFS1,VHL	49
Post-Translational Modification	hydrolysis	hydrolysis of protein	3.91E-05		0.321	ADAM17,ADAMTS13,ADAMTS20,ADAMTS4,ADAMTS9,ADRM1,ALOX12,ALOX15,ALOX5,ANPEP,ATG4A,ATG4B,ATG4C,AURKAIP1,BACE1,BAG6,BMP1,BTRC,C9orf3,CAPN1,CAPN10,CAPN2,CAPN3,CAPNS1,CASP2,CASP3,CASP6,CASP7,CASP8,CASP9 (includes EG:100140945),CD46,CLN6,CMA1,CNDP1,CNDP2,CORIN,CPA1 (includes EG:109697),CPN1,CTSB,CTSC,CTSD,CTSH,CTSK,CTSL2,CTSS,DLD,DPEP3,DPP3,DPP4,ECE1,ENDOU,ENPEP,ERAP1,F2,FBXL2,FBXL6,FBXO2,FBXO3,FBXO6,FBX…	125
Protein Degradation	hydrolysis	hydrolysis of protein	3.91E-05		0.321	ADAM17,ADAMTS13,ADAMTS20,ADAMTS4,ADAMTS9,ADRM1,ALOX12,ALOX15,ALOX5,ANPEP,ATG4A,ATG4B,ATG4C,AURKAIP1,BACE1,BAG6,BMP1,BTRC,C9orf3,CAPN1,CAPN10,CAPN2,CAPN3,CAPNS1,CASP2,CASP3,CASP6,CASP7,CASP8,CASP9 (includes EG:100140945),CD46,CLN6,CMA1,CNDP1,CNDP2,CORIN,CPA1 (includes EG:109697),CPN1,CTSB,CTSC,CTSD,CTSH,CTSK,CTSL2,CTSS,DLD,DPEP3,DPP3,DPP4,ECE1,ENDOU,ENPEP,ERAP1,F2,FBXL2,FBXL6,FBXO2,FBXO3,FBXO6,FBX…	125
Protein Synthesis	hydrolysis	hydrolysis of protein	3.91E-05		0.321	ADAM17,ADAMTS13,ADAMTS20,ADAMTS4,ADAMTS9,ADRM1,ALOX12,ALOX15,ALOX5,ANPEP,ATG4A,ATG4B,ATG4C,AURKAIP1,BACE1,BAG6,BMP1,BTRC,C9orf3,CAPN1,CAPN10,CAPN2,CAPN3,CAPNS1,CASP2,CASP3,CASP6,CASP7,CASP8,CASP9 (includes EG:100140945),CD46,CLN6,CMA1,CNDP1,CNDP2,CORIN,CPA1 (includes EG:109697),CPN1,CTSB,CTSC,CTSD,CTSH,CTSK,CTSL2,CTSS,DLD,DPEP3,DPP3,DPP4,ECE1,ENDOU,ENPEP,ERAP1,F2,FBXL2,FBXL6,FBXO2,FBXO3,FBXO6,FBX…	125
Cancer	chronic myeloproliferative disorder	chronic myeloproliferative disorder	4.00E-05		-0.526	ABL1,ADA,ADORA2A,ALOX5,ARHGAP26,ASXL1,ATP1A1,ATP1A2,ATP1A4,AXL,BCR,BMP1,BMP6,BMP7,BMPR2,BRAF,CPT1A,CPT1B,CSF1R,CSF2,CSF2RB,CTNNB1,CXCR4,DHFR,DPP4,EGFR,EPHA2,EPO,FDFT1,FGFR2,FKBP1A,FLT3,FNTA,FNTB,FOXO1 (includes EG:2308),FOXO3,FYN,GART,GATA2,HDAC1,HDAC10,HDAC11,HDAC2,HDAC3,HDAC4,HDAC5,HDAC6,HDAC7,HDAC9,HTR3E,IFNAR1,IL18 (includes EG:16173),IL1B,IL27RA,IL2RA,IL2RB,IL2RG,IRAK2,IRF8,ITGAV,ITGB3,ITGB5…	99
Hematological Disease	chronic myeloproliferative disorder	chronic myeloproliferative disorder	4.00E-05		-0.526	ABL1,ADA,ADORA2A,ALOX5,ARHGAP26,ASXL1,ATP1A1,ATP1A2,ATP1A4,AXL,BCR,BMP1,BMP6,BMP7,BMPR2,BRAF,CPT1A,CPT1B,CSF1R,CSF2,CSF2RB,CTNNB1,CXCR4,DHFR,DPP4,EGFR,EPHA2,EPO,FDFT1,FGFR2,FKBP1A,FLT3,FNTA,FNTB,FOXO1 (includes EG:2308),FOXO3,FYN,GART,GATA2,HDAC1,HDAC10,HDAC11,HDAC2,HDAC3,HDAC4,HDAC5,HDAC6,HDAC7,HDAC9,HTR3E,IFNAR1,IL18 (includes EG:16173),IL1B,IL27RA,IL2RA,IL2RB,IL2RG,IRAK2,IRF8,ITGAV,ITGB3,ITGB5…	99
Molecular Transport	transport	transport of cation	4.13E-05		1.232	ABCB1,ABCC8,ACCN2,ACCN3,ADRA2A,ADRB1,ADRB2,AGT,ANXA6,AP3B1,AP3D1,AQP1,ARL2,ATOX1,ATP12A,ATP1A1,ATP1A2,ATP1A4,ATP1B1,ATP1B3,ATP1B4,ATP2A1,ATP2A2,ATP2A3,ATP2B1,ATP2B2,ATP2B4,ATP2C1,ATP2C2,ATP5B,ATP5D,ATP5L,ATP6V0A4,ATP6V0B,ATP6V0E1,ATP6V1B1,ATP6V1B2,ATP6V1E1,ATP6V1E2,ATP6V1G2,ATP7A,ATP7B,C16orf7,CA2,CACNA1A,CACNA1B,CACNA1E,CACNA1G,CACNA1H,CACNA2D1,CACNA2D2,CACNB1,CACNB2,CACNB3,CACNB4,CAMK2A,CAMK2D,…	214
Cellular Function and Maintenance	autophagy	autophagy of tumor cell lines	4.15E-05		1.583	AGER,APP,ATF4,ATG5 (includes EG:11793),BAIAP2,BECN1,BNIP3,BRCA1,CAPN1,CAPNS1,CATSPER4,CDKN2D,CFLAR,CHEK1,CHRND,CHUK,COX5A (includes EG:12858),DDIT4,EEF2K,EIF2AK3,ERN1,FADD,FAS,FBXL20,GAB1,GABARAPL1,GABARAPL2,GABBR2,GJA4,GNAI3,GPR18,GTF2IRD2,HIVEP2,IKBKB,KIF5C,KRT18,MAP1LC3A,MAP2K1,MAP2K2,MAP3K7 (includes EG:172842),MAPK8,MEGF10,MTMR3,MTOR,NCR3,NFE2L2,NQO1,PCGF1,PIK3C3,PINK1,PPFIA4,PRKDC,RAB1A,RAC…	66
Cell Morphology	autophagy	autophagy of tumor cell lines	4.15E-05		1.583	AGER,APP,ATF4,ATG5 (includes EG:11793),BAIAP2,BECN1,BNIP3,BRCA1,CAPN1,CAPNS1,CATSPER4,CDKN2D,CFLAR,CHEK1,CHRND,CHUK,COX5A (includes EG:12858),DDIT4,EEF2K,EIF2AK3,ERN1,FADD,FAS,FBXL20,GAB1,GABARAPL1,GABARAPL2,GABBR2,GJA4,GNAI3,GPR18,GTF2IRD2,HIVEP2,IKBKB,KIF5C,KRT18,MAP1LC3A,MAP2K1,MAP2K2,MAP3K7 (includes EG:172842),MAPK8,MEGF10,MTMR3,MTOR,NCR3,NFE2L2,NQO1,PCGF1,PIK3C3,PINK1,PPFIA4,PRKDC,RAB1A,RAC…	66
Cellular Development	differentiation	differentiation of mononuclear leukocytes	4.16E-05	Increased	3.070	ABL1,ADA,ADAM17,AGER,AHR,AP3B1,AP3D1,APC,APP,ATM,ATP7A,AXL,B4GALNT1,BAD,BCL2A1,BCL3,BCL6,BLM,BLNK,BMI1,BMP4,BTK,CAMP,CARD11,CBFB,CCR7,CD14,CD274,CD3D,CD3E,CD4,CD40,CD80 (includes EG:12519),CD86,CD8A,CDKN1B,CHD7,CRTC2,CSF1 (includes EG:12977),CSF1R,CSF2,CTNNB1,CTNNBIP1,CXCR4,DCLRE1C,DEF6,DICER1,DLL4,DNAJA3,DTX1,EBF1,EGR1,EGR3,EIF2AK4,ELK1,ELK4,ETS1,ETS2,FANCC,FAS,FCGR2B,FLT3,FLT3LG,FOS,FOXP3,FZD5,…	263
Hematological System Development and Function	differentiation	differentiation of mononuclear leukocytes	4.16E-05	Increased	3.070	ABL1,ADA,ADAM17,AGER,AHR,AP3B1,AP3D1,APC,APP,ATM,ATP7A,AXL,B4GALNT1,BAD,BCL2A1,BCL3,BCL6,BLM,BLNK,BMI1,BMP4,BTK,CAMP,CARD11,CBFB,CCR7,CD14,CD274,CD3D,CD3E,CD4,CD40,CD80 (includes EG:12519),CD86,CD8A,CDKN1B,CHD7,CRTC2,CSF1 (includes EG:12977),CSF1R,CSF2,CTNNB1,CTNNBIP1,CXCR4,DCLRE1C,DEF6,DICER1,DLL4,DNAJA3,DTX1,EBF1,EGR1,EGR3,EIF2AK4,ELK1,ELK4,ETS1,ETS2,FANCC,FAS,FCGR2B,FLT3,FLT3LG,FOS,FOXP3,FZD5,…	263
Hematopoiesis	differentiation	differentiation of mononuclear leukocytes	4.16E-05	Increased	3.070	ABL1,ADA,ADAM17,AGER,AHR,AP3B1,AP3D1,APC,APP,ATM,ATP7A,AXL,B4GALNT1,BAD,BCL2A1,BCL3,BCL6,BLM,BLNK,BMI1,BMP4,BTK,CAMP,CARD11,CBFB,CCR7,CD14,CD274,CD3D,CD3E,CD4,CD40,CD80 (includes EG:12519),CD86,CD8A,CDKN1B,CHD7,CRTC2,CSF1 (includes EG:12977),CSF1R,CSF2,CTNNB1,CTNNBIP1,CXCR4,DCLRE1C,DEF6,DICER1,DLL4,DNAJA3,DTX1,EBF1,EGR1,EGR3,EIF2AK4,ELK1,ELK4,ETS1,ETS2,FANCC,FAS,FCGR2B,FLT3,FLT3LG,FOS,FOXP3,FZD5,…	263
Cellular Assembly and Organization	outgrowth	outgrowth of neurites	4.16E-05	Increased	3.116	A2M,ADAM10,ADAM17,ADORA2A,ALS2,ANP32A,APOE,APP,AR,ARG1,ARHGAP17,ARHGAP32,ARHGEF25,BAIAP2,BASP1,BCAN,BDNF,BMP2,BMP4,BTG3,CAT,CD9,CDH2,CDK1,CDK2,CDK5,CDK5R2,CNPY2,CREB1,CSF1 (includes EG:12977),CSNK1D,CXCL9,DNAJA3,DOK4,DPYSL2,DVL1,E2F1,EFNB1,EFNB2,EFNB3,EGFR,ELK1,ELMO2,EPHB2,EXOC7,EXT1,F2,FAIM,FEZ1,FGF1,FGF18,FGF2,FGF7,FGFR1,FGFR3,FGFR4,FKBP4,FRK,GAB1,GAL,GAS7,GDNF,GFAP,GFRA2,GJA1,GJB1,GPR3,HDGFRP3…	177
Cell Morphology	outgrowth	outgrowth of neurites	4.16E-05	Increased	3.116	A2M,ADAM10,ADAM17,ADORA2A,ALS2,ANP32A,APOE,APP,AR,ARG1,ARHGAP17,ARHGAP32,ARHGEF25,BAIAP2,BASP1,BCAN,BDNF,BMP2,BMP4,BTG3,CAT,CD9,CDH2,CDK1,CDK2,CDK5,CDK5R2,CNPY2,CREB1,CSF1 (includes EG:12977),CSNK1D,CXCL9,DNAJA3,DOK4,DPYSL2,DVL1,E2F1,EFNB1,EFNB2,EFNB3,EGFR,ELK1,ELMO2,EPHB2,EXOC7,EXT1,F2,FAIM,FEZ1,FGF1,FGF18,FGF2,FGF7,FGFR1,FGFR3,FGFR4,FKBP4,FRK,GAB1,GAL,GAS7,GDNF,GFAP,GFRA2,GJA1,GJB1,GPR3,HDGFRP3…	177
Nervous System Development and Function	outgrowth	outgrowth of neurites	4.16E-05	Increased	3.116	A2M,ADAM10,ADAM17,ADORA2A,ALS2,ANP32A,APOE,APP,AR,ARG1,ARHGAP17,ARHGAP32,ARHGEF25,BAIAP2,BASP1,BCAN,BDNF,BMP2,BMP4,BTG3,CAT,CD9,CDH2,CDK1,CDK2,CDK5,CDK5R2,CNPY2,CREB1,CSF1 (includes EG:12977),CSNK1D,CXCL9,DNAJA3,DOK4,DPYSL2,DVL1,E2F1,EFNB1,EFNB2,EFNB3,EGFR,ELK1,ELMO2,EPHB2,EXOC7,EXT1,F2,FAIM,FEZ1,FGF1,FGF18,FGF2,FGF7,FGFR1,FGFR3,FGFR4,FKBP4,FRK,GAB1,GAL,GAS7,GDNF,GFAP,GFRA2,GJA1,GJB1,GPR3,HDGFRP3…	177
Cellular Movement	cell movement	cell movement of leukocytes	4.26E-05	Increased	2.987	ABCC1,ACTN4,ADAM10,ADAM17,ADM,ADORA2A,ADRB2,ADRBK1,AGER,AGT,AKT2,ALB,ALOX5,ALOX5AP,AMICA1,ANGPT2,APOA1,APOE,APP,ARHGAP1,ARHGEF1,ARRB1,ARRB2,B4GALT1,BAG4,BGN,BMPR1A,BMPR2,BTK,C1GALT1,C2,C3,C3AR1,C5,CAMK1D,CAMP,CAST,CBFB,CBLB,CCBP2,CCDC88A,CCL16,CCL17,CCL20,CCL22,CCL25,CCL28,CCL5,CCND1,CCNT1,CCR4,CCR6,CCR7,CCR8,CD14,CD151,CD207,CD274,CD36,CD4,CD40,CD47,CD48,CD58,CD80 (includes EG:12519),CD86,CD8A,C…	417
Hematological System Development and Function	cell movement	cell movement of leukocytes	4.26E-05	Increased	2.987	ABCC1,ACTN4,ADAM10,ADAM17,ADM,ADORA2A,ADRB2,ADRBK1,AGER,AGT,AKT2,ALB,ALOX5,ALOX5AP,AMICA1,ANGPT2,APOA1,APOE,APP,ARHGAP1,ARHGEF1,ARRB1,ARRB2,B4GALT1,BAG4,BGN,BMPR1A,BMPR2,BTK,C1GALT1,C2,C3,C3AR1,C5,CAMK1D,CAMP,CAST,CBFB,CBLB,CCBP2,CCDC88A,CCL16,CCL17,CCL20,CCL22,CCL25,CCL28,CCL5,CCND1,CCNT1,CCR4,CCR6,CCR7,CCR8,CD14,CD151,CD207,CD274,CD36,CD4,CD40,CD47,CD48,CD58,CD80 (includes EG:12519),CD86,CD8A,C…	417
Immune Cell Trafficking	cell movement	cell movement of leukocytes	4.26E-05	Increased	2.987	ABCC1,ACTN4,ADAM10,ADAM17,ADM,ADORA2A,ADRB2,ADRBK1,AGER,AGT,AKT2,ALB,ALOX5,ALOX5AP,AMICA1,ANGPT2,APOA1,APOE,APP,ARHGAP1,ARHGEF1,ARRB1,ARRB2,B4GALT1,BAG4,BGN,BMPR1A,BMPR2,BTK,C1GALT1,C2,C3,C3AR1,C5,CAMK1D,CAMP,CAST,CBFB,CBLB,CCBP2,CCDC88A,CCL16,CCL17,CCL20,CCL22,CCL25,CCL28,CCL5,CCND1,CCNT1,CCR4,CCR6,CCR7,CCR8,CD14,CD151,CD207,CD274,CD36,CD4,CD40,CD47,CD48,CD58,CD80 (includes EG:12519),CD86,CD8A,C…	417
Cell Signaling	enzyme linked receptor protein signaling pathway	enzyme linked receptor protein signaling pathway	4.39E-05			ACVR1B,ACVR2A,ACVR2B,AKAP3,AKAP7,ANGPT1,ANGPT2,ANGPTL1,AXL,BDKRB2,BLNK,BMPR2,CD3E,CD3EAP,CD4,CNKSR1,CSPG4,DDR2 (includes EG:18214),DOK2,DOK4,ECSIT,EPHB2,ERBB3,FLT1,FLT3,FRS2,GAB2,GAS6,GDNF,GFRA2,GFRA3,GNG7,GUCA1B,GUCY2C,GUCY2D,GUCY2F,IRS1,JAK2,KDR,LAT,LCP2,MPZL1,MUSK,MYD88,NPPA,NPPC,NPR1 (includes EG:18160),NPR2 (includes EG:116564),NRTN,PPM1L,PTN,PTPRD,PTPRE,PTPRF,PTPRG,PTPRN,PTPRT,RAPGEF1,SHC3,…	64
Cell Cycle	interphase	interphase of fibroblast cell lines	4.46E-05		-1.148	ABL1,ADRA1D,AKAP12,ARAF,BMI1,BMP4,BRAF,BRCA1,C11orf82,CAV1,CCND1,CCND3,CCNE1,CDC25A,CDKN1A,CDKN1B,CDKN2B,CDKN2D,CHEK1,CHEK2,CKS1B,CSF1 (includes EG:12977),CSNK2B,DDX3X,DMTF1,E2F1,E2F2,E2F3,E2F4,E2F6,E4F1,FOS,GADD45A,GAS1 (includes EG:14451),GNB2L1,GPI,GTF2I,HDAC1,IRS1,JUN,LATS1,LMNA,MAP2K1,MAP2K3,MAP2K6,MAP2K7,MAPK14,MLH1,MSH2,MXD1,MYC,NCOA3,NRAS,PARP1,PMS2,PPAP2C,PPP5C,PRKDC,PTPN11,PTTG1,PURA,RA…	80
Cell Cycle	cytokinesis	cytokinesis of tumor cell lines	4.76E-05		-0.370	AKAP9,BECN1,CASC1,CD2AP,CEP55,CNTROB,DIAPH3,ECT2,EIF3E,GNAI1,GNAI2,GNAI3,KIF20A,KIF23,KIF4A,KIFC1,LZTS2,MASTL,MYH14,NEDD4L,NEK7,PIK3C3,PIN1,PPP1CC,RGS14,RHOA,SEPT11,SEPT6,SEPT7,SEPT9,SIAH1,SPG20,SSRP1,STX16,TOP2A,TTC19,VAV3,ZFYVE26	38
Cellular Movement	cytokinesis	cytokinesis of tumor cell lines	4.76E-05		-0.370	AKAP9,BECN1,CASC1,CD2AP,CEP55,CNTROB,DIAPH3,ECT2,EIF3E,GNAI1,GNAI2,GNAI3,KIF20A,KIF23,KIF4A,KIFC1,LZTS2,MASTL,MYH14,NEDD4L,NEK7,PIK3C3,PIN1,PPP1CC,RGS14,RHOA,SEPT11,SEPT6,SEPT7,SEPT9,SIAH1,SPG20,SSRP1,STX16,TOP2A,TTC19,VAV3,ZFYVE26	38
Cell-To-Cell Signaling and Interaction	response	response of antigen presenting cells	4.76E-05		1.731	ABCA7,AGER,APOA1,APOA2,APP,BECN1,C3,CAMP,CCL22,CCL5,CD14,CD36,CD40,CD47,CNN2,CSF2,CTSS,DDX58,DEF6,EIF2AK1,F2R,FAS,FCGR2B,FGR,GAB2,GNAQ,HCK,HMOX1,ICOSLG,IL18 (includes EG:16173),IL4 (includes EG:16189),IL6,INPP5D,IRF2,IRF8,ITGB2,LYN,MAPK14,MFGE8,MYD88,NCOA2,NOS2,NR3C1,O3FAR1,OTUD5,P2RX7,PGLYRP1,PIK3CG,PRKCE,PROC,PTEN,RAPGEF3,SCARB1,SERPINE1,SOCS1,SPHK1,SPI1 (includes EG:20375),SPON2,TGM2,THBS1,TLR…	71
Cancer	hyperproliferation	hyperproliferation	4.81E-05		-0.868	ADRA1B,ADRA1D,AGER,AGPAT2,AHR,AIF1 (includes EG:11629),AKAP12,AKT2,ANGPT1,APC,APOE,AR,AXL,BCL3,BCL6,BIRC5,BMPR1A,BMPR2,BRCA1,BTG2,BTK,C1QBP,C3,CASP2,CASP3,CASP8,CASP9 (includes EG:100140945),CAV1,CBL,CCNA2,CCND1,CCND2,CCND3,CCNE1,CD40,CD86,CDC25B,CDC37,CDH1,CDH3,CDK2,CDK4,CDKN1A,CDKN1B,CDKN1C,CDKN2C,CDKN2D,CEBPD,CLDN3,CLDN7,CLU,CP,CSF1 (includes EG:12977),CSF2,CSNK2A2,CST6 (includes EG:1474),CTNN…	282
Cell Signaling	MAPKKK cascade	MAPKKK cascade	4.82E-05		1.887	ADAM9,ADRA2B,ADRB2,AGT,APC,AR,ATP6AP2,BMP4,BNIP2,BRAF,BRAP,CAMKK2,CAV1,CAV3,CD36,CDON,CTNNB1,DAG1,DOK2,DOK4,DUSP16,DUSP3,EGFR,ERCC6,F2R,FGF13,FGF2,FGF8,FGFR1,FGFR2,FGFR3,FLT1,FLT3,GAB1,GADD45B,GADD45G,GNAI2,GRB2,ID1,IGF1R,IGF2,IGFBP3,IGFBP4,IL6,IL6R,ILK,INSR,ITGAV,ITGB1,ITGB3,JAK2,KDR,LAMTOR1,LAMTOR2,LAMTOR3,LIF,LOC643751,LPAR1,LPAR2,LRRK2,MAP2K1,MAP2K2,MAP2K3,MAP2K4,MAP2K6,MAP3K1,MAP3K11,MAP3K13…	113
Developmental Disorder	congenital anomaly of skin	congenital anomaly of skin	4.82E-05		-0.447	ABHD5,ABL1,ADAMTS2,ADAMTS4,ADM,ALOX12B,ALOXE3,AP3B1,AR,ATP6V0A2,ATP7A,BCR,BLOC1S3,BRAF,CACNA1F,CCND1,CD151,CLDN1,COL17A1,COL1A1,COL1A2,COL3A1,CSF1R,CTNNB1,CYP19A1,DDIT3,DHFR,DKC1,DLX3,DSP,DTNBP1,EDNRB,EFEMP2,EGFR,EIF4EBP1,ELN,ERCC2,ERCC3,FBLN5,FGFR1,FGFR3,FKBP1A,FLNA,FLT1,FLT3,FNTA,FNTB,FOXC2,GJA1,GJB2,GJB3,GJB6,GTF2H5,HMGCR,HMOX1,HOXC13,HPS1 (includes EG:114638),HPS3,HPS5,HPS6,IFNAR1,ITGA6,ITGB4…	113
Dermatological Diseases and Conditions	congenital anomaly of skin	congenital anomaly of skin	4.82E-05		-0.447	ABHD5,ABL1,ADAMTS2,ADAMTS4,ADM,ALOX12B,ALOXE3,AP3B1,AR,ATP6V0A2,ATP7A,BCR,BLOC1S3,BRAF,CACNA1F,CCND1,CD151,CLDN1,COL17A1,COL1A1,COL1A2,COL3A1,CSF1R,CTNNB1,CYP19A1,DDIT3,DHFR,DKC1,DLX3,DSP,DTNBP1,EDNRB,EFEMP2,EGFR,EIF4EBP1,ELN,ERCC2,ERCC3,FBLN5,FGFR1,FGFR3,FKBP1A,FLNA,FLT1,FLT3,FNTA,FNTB,FOXC2,GJA1,GJB2,GJB3,GJB6,GTF2H5,HMGCR,HMOX1,HOXC13,HPS1 (includes EG:114638),HPS3,HPS5,HPS6,IFNAR1,ITGA6,ITGB4…	113
Cell Death	apoptosis	apoptosis of liver cells	4.83E-05		1.251	ADM,AHR,ATF7,BAK1,BCL2L1,CASP3,CASP7,CASP8,CASP9 (includes EG:100140945),CD274,CD40,CDKN1A,CHUK,CIT,CTSB,CYP7A1,DAXX,DICER1,EGFR,ENDOG,EPO,FAS,GADD45B,GSK3B,HGF,IKBKB,IL4 (includes EG:16189),IL6,IL6ST,IRF5,ITGAV,ITGB3,JUN,MAP2K1,MAP2K4,MAPK14,MAPK8,MAPK9,MCL1,MET,MMP9,MTOR,MYC,MYD88,NCF1,NFKB1,NGF,NOS2,NPC1,NR0B2,NR1H4,NR1I3,OSM,PTGER1,PTPN1,PTPRC,RB1,RBCK1,SMAD3,SMPD1,SOCS3,SOD2,STAT6,TBK1,TIMP3…	78
Cellular Assembly and Organization	development	development of plasma membrane projections	4.84E-05		1.444	ABI2,ABL2,ACHE,ACTB,ACTR3,ADORA2A,AFG3L2,AGER,AGRN,AKAP5,ALS2,AMIGO1,APC,APOE,APP,ARHGEF25,ATL1,ATP7A,ATXN10,BACE1,BAIAP2,BASP1,BBS4,BDNF,BMP7,BRAF,BRSK1,BRSK2,BTG2,CACNA1A,CACNA1F,CAMK1D,CAPZB,CAV1,CDC20,CDH2,CDK5,CDK5R1,CELSR2,CHN1,CHRNA1,CHRNB2,CIT,CLU,CNP,CNTNAP1,CREB1,CRHR1,CRMP1,CSNK2A2,CSPG4,CTNND1,CYP19A1,CYTH2,DBN1,DICER1,DLX5,DNM1L,DOCK7,DPYSL2,DPYSL4,DRGX,DTNBP1,DVL1,DYNLT1,EFHD1,EFNA1…	255
Cellular Function and Maintenance	exocytosis	exocytosis by cells	4.86E-05		-0.553	ARFGEF1,ARFGEF2,ATP2A2,CADPS,CADPS2,CDK5,CSF2,EXOC2,EXOC3L1,EXOC7,EXOC8,EXPH5,FCER1A,GNAI2,GNAI3,HGS,IL4 (includes EG:16189),ITSN1,LNPEP,LOC643751,MIA3,MYH10,MYO5A,NAPB,NCS1,NSF,OTOF,PRKCA,RAB26,RAB27B,RAB2B,RAB3A,RAB3B,RAB3D,RAB5A,RAB9A,RAPGEF4,SCAMP1,SCAMP2,SEPT5,SGK1,SMPD1,SNAP23,SNAP29,SRCIN1,STX1A,STX3,STXBP1,STXBP2,STXBP3,STXBP5,SYTL2,SYTL3,SYTL4,SYTL5,TNF,UNC13D,VAMP2,VAMP3,VAMP8	60
Molecular Transport	exocytosis	exocytosis by cells	4.86E-05		-0.553	ARFGEF1,ARFGEF2,ATP2A2,CADPS,CADPS2,CDK5,CSF2,EXOC2,EXOC3L1,EXOC7,EXOC8,EXPH5,FCER1A,GNAI2,GNAI3,HGS,IL4 (includes EG:16189),ITSN1,LNPEP,LOC643751,MIA3,MYH10,MYO5A,NAPB,NCS1,NSF,OTOF,PRKCA,RAB26,RAB27B,RAB2B,RAB3A,RAB3B,RAB3D,RAB5A,RAB9A,RAPGEF4,SCAMP1,SCAMP2,SEPT5,SGK1,SMPD1,SNAP23,SNAP29,SRCIN1,STX1A,STX3,STXBP1,STXBP2,STXBP3,STXBP5,SYTL2,SYTL3,SYTL4,SYTL5,TNF,UNC13D,VAMP2,VAMP3,VAMP8	60
Cell Cycle	cytokinesis	cytokinesis of cervical cancer cell lines	4.91E-05		0.187	AKAP9,BECN1,CD2AP,CEP55,CNTROB,DIAPH3,EIF3E,GNAI1,GNAI2,GNAI3,KIF20A,KIF23,KIF4A,KIFC1,MASTL,NEDD4L,NEK7,PIK3C3,PIN1,RGS14,RHOA,SEPT11,SEPT6,SEPT7,SEPT9,SPG20,SSRP1,STX16,TTC19,VAV3,ZFYVE26	31
Cellular Movement	cytokinesis	cytokinesis of cervical cancer cell lines	4.91E-05		0.187	AKAP9,BECN1,CD2AP,CEP55,CNTROB,DIAPH3,EIF3E,GNAI1,GNAI2,GNAI3,KIF20A,KIF23,KIF4A,KIFC1,MASTL,NEDD4L,NEK7,PIK3C3,PIN1,RGS14,RHOA,SEPT11,SEPT6,SEPT7,SEPT9,SPG20,SSRP1,STX16,TTC19,VAV3,ZFYVE26	31
Tissue Development	development	development of endothelial tissue	4.99E-05		-0.122	ADAM15,ADAMTS1,ADAMTS8,ADM,ADRA2B,AGGF1,AIMP1,ANG,ANGPT2,ANGPTL1,ANGPTL4,ANPEP,APOA1,APOE,APOH,ARG1,ARHGAP24,ATP5A1,ATPIF1,AXL,BMP2,BMP4,BMP6,BMP7,BMPR2,C3,CALR,CAV1,CAV2,CCM2,CD36,CDH13,CDH2,COL18A1,COL4A1,COL4A2,COL4A3,COMP,CSF1 (includes EG:12977),CSF1R,CXCL2,CYBA,DLL4,ECM1 (includes EG:100332249),EDN1,EDNRB,EFNB2,EGR3,ENG,EPHB4,EPO,ERAP1,F11R,FGF1,FGF13,FGF2,FGFR3,FLT1,FOXA1,FOXM1,FOXO1 (incl…	135
Cardiovascular System Development and Function	development	development of endothelial tissue	4.99E-05		-0.122	ADAM15,ADAMTS1,ADAMTS8,ADM,ADRA2B,AGGF1,AIMP1,ANG,ANGPT2,ANGPTL1,ANGPTL4,ANPEP,APOA1,APOE,APOH,ARG1,ARHGAP24,ATP5A1,ATPIF1,AXL,BMP2,BMP4,BMP6,BMP7,BMPR2,C3,CALR,CAV1,CAV2,CCM2,CD36,CDH13,CDH2,COL18A1,COL4A1,COL4A2,COL4A3,COMP,CSF1 (includes EG:12977),CSF1R,CXCL2,CYBA,DLL4,ECM1 (includes EG:100332249),EDN1,EDNRB,EFNB2,EGR3,ENG,EPHB4,EPO,ERAP1,F11R,FGF1,FGF13,FGF2,FGFR3,FLT1,FOXA1,FOXM1,FOXO1 (incl…	135
Metabolic Disease	organic aciduria	organic aciduria	5.03E-05			BCKDHA,BCKDHB,BTD,CPS1,D2HGDH,DBT,DLD,ETFA,ETFB,ETFDH,GCDH,IVD,L2HGDH,MCCC1,MLYCD,MMAA,MMAB,MMACHC,MMADHC,MUT,PCCA,PCCB,SOD2	23
Cell Death	cell death	cell death of colon cancer cell lines	5.05E-05		0.022	ABL1,ADAM17,AHSA1,ALOX15,AP2A2,APC,ATF3,ATMIN,AXIN1,BAG3,BAK1,BCL2L1,BECN1,BIRC5,BIRC7,BNIP3,C9orf86,CAMP,CASP2,CASP3,CASP6,CASP8,CASP9 (includes EG:100140945),CDC7 (includes EG:12545),CDK1,CDKN1A,CDKN1B,CDKN1C,CFLAR,CHEK2,CKAP2,CLU,COL18A1,CSE1L,CTBP1,CTBP2,CTNNB1,CYCS,CYFIP2,DAXX,DDIT3,DFFA,DIABLO,DSG2,DTYMK,E2F1,EDN1,EGFR,ELL,EPHB4,ETS1,EXOC2,FADD,FAS,FASN,FGF2,FLT1,FOXO1 (includes EG:2308),FO…	158
Cell Death	cell death	cell death of thymus gland	5.11E-05		0.321	ABL1,ADA,ADORA2A,ADRB1,AHR,ATM,BAD,BAK1,BCL2L1,BIRC5,BMF,BMP4,BRCA1,CASP3,CASP8,CASP9 (includes EG:100140945),CD3E,CDK2,CDKN1A,CHEK1,CHEK2,CHUK,CTNNB1,DDIT4,DFFA,DNAJA3,E2F1,EGR1,EGR3,ETS2,FADD,FAS,FOS,FYN,GFI1,GZMA,HIST1H1C,HOXA3,ID3 (includes EG:15903),IKBKB,IL7,JUN,KIFAP3,LGALS1,MAP3K2,MAPK8,MAPK9,MCL1,MXD3,MYC,NFKBID,NQO1,NQO2,NR3C1,NR4A1,NR5A1,PARP1,PERP,PIK3CD,PIK3CG,PRKDC,PTPRC,RIPK1,RNASE…	83
Tissue Development	adhesion	adhesion of connective tissue cells	5.24E-05		0.887	ADM,ADNP,AGT,ARHGAP24,BCR,CALR,CBL,CCND1,CD4,CD46,CDH1,CDH2,CDH3,COL1A1,CSF2,CSK,CTGF,CXCR6,FGF2,GNPNAT1,GRID2,ICAM1,IGF2,IGF2R,IL4 (includes EG:16189),IQGAP1,ITGA11,ITGA5,ITGA9,ITGAL,ITGAV,ITGB1,ITGB3,JAG1,JUP,LGALS8,LRPAP1,MAN2A1,MAP3K1,MECOM,MET,MGAT5,MMP2,MYOC,PALLD,PDCD6IP,PLAU,PLAUR,PLXND1,POSTN,PTK2B (includes EG:19229),RAC1,RAMP2,RAPGEF1,RHOA,RHOB,ROCK1,ROCK2,RUNX1,SLC4A2,SPN,SPP1 (includ…	76
Cell-To-Cell Signaling and Interaction	adhesion	adhesion of connective tissue cells	5.24E-05		0.887	ADM,ADNP,AGT,ARHGAP24,BCR,CALR,CBL,CCND1,CD4,CD46,CDH1,CDH2,CDH3,COL1A1,CSF2,CSK,CTGF,CXCR6,FGF2,GNPNAT1,GRID2,ICAM1,IGF2,IGF2R,IL4 (includes EG:16189),IQGAP1,ITGA11,ITGA5,ITGA9,ITGAL,ITGAV,ITGB1,ITGB3,JAG1,JUP,LGALS8,LRPAP1,MAN2A1,MAP3K1,MECOM,MET,MGAT5,MMP2,MYOC,PALLD,PDCD6IP,PLAU,PLAUR,PLXND1,POSTN,PTK2B (includes EG:19229),RAC1,RAMP2,RAPGEF1,RHOA,RHOB,ROCK1,ROCK2,RUNX1,SLC4A2,SPN,SPP1 (includ…	76
Tissue Morphology	remodeling	remodeling of tissue	5.26E-05		-1.629	ACP5,ADAM8,ADRB2,AHSG,ANGPT2,AR,AXL,BMPR2,CA2,CALCB,CSF1 (includes EG:12977),CSK,CTNNB1,CTSK,DICER1,EDN1,EFNA2,EFNB2,EGR1,EIF2C2,ENG,ENPP1,EPHA2,EPHB2,EPHB3,FCER1G,FST,GAS6,GGT1,GLP1R,GSN,HDC,HIVEP2,HMOX1,HNF1A,HRH1,IGF2,IL1A,IL1B,IL6,IL6R,IL6ST,IL7,INPP5D,ITGAV,ITGB3,KL,LECT1,LIF,LIPA,LRP5,LRP6,LTBP3,MAP3K5,MAPK14,MITF,MMP14,MMP2,MMP9,MYD88,NCDN,NOS1,NOS2,OSM,P2RX7,PDGFRB,PTAFR,PTGER4,PTH1R,PTHL…	88
Cancer	systemic mastocytosis	systemic mastocytosis	5.35E-05			ABL1,BCR,EPHA2,FKBP1A,FLT3,FYN,IL2RA,IL2RB,IL2RG,KIT,LCK,MTOR,PDGFRA,PDGFRB,SRC,YES1	16
Hematological Disease	systemic mastocytosis	systemic mastocytosis	5.35E-05			ABL1,BCR,EPHA2,FKBP1A,FLT3,FYN,IL2RA,IL2RB,IL2RG,KIT,LCK,MTOR,PDGFRA,PDGFRB,SRC,YES1	16
Organismal Injury and Abnormalities	systemic mastocytosis	systemic mastocytosis	5.35E-05			ABL1,BCR,EPHA2,FKBP1A,FLT3,FYN,IL2RA,IL2RB,IL2RG,KIT,LCK,MTOR,PDGFRA,PDGFRB,SRC,YES1	16
Dermatological Diseases and Conditions	systemic mastocytosis	systemic mastocytosis	5.35E-05			ABL1,BCR,EPHA2,FKBP1A,FLT3,FYN,IL2RA,IL2RB,IL2RG,KIT,LCK,MTOR,PDGFRA,PDGFRB,SRC,YES1	16
Immunological Disease	systemic mastocytosis	systemic mastocytosis	5.35E-05			ABL1,BCR,EPHA2,FKBP1A,FLT3,FYN,IL2RA,IL2RB,IL2RG,KIT,LCK,MTOR,PDGFRA,PDGFRB,SRC,YES1	16
Molecular Transport	transport	transport of ion	5.35E-05		1.684	ABCA1,ABCB1,ABCC1,ABCC2,ABCC3,ABCC8,ACCN2,ACCN3,ADD2,ADRA2A,ADRB1,ADRB2,AGT,AKAP5,AKAP7,ANKH,ANO1,ANXA6,AP3B1,AP3D1,AQP1,AQP11,AQP6,ARL2,ASNA1,ATOX1,ATP12A,ATP1A1,ATP1A2,ATP1A4,ATP1B1,ATP1B3,ATP1B4,ATP2A1,ATP2A2,ATP2A3,ATP2B1,ATP2B2,ATP2B4,ATP2C1,ATP2C2,ATP5B,ATP5D,ATP5L,ATP6V0A4,ATP6V0B,ATP6V0E1,ATP6V1B1,ATP6V1B2,ATP6V1E1,ATP6V1E2,ATP6V1G2,ATP7A,ATP7B,BEST1,BEST3,C16orf7,CA2,CA4,CACNA1A,CACNA1B,…	287
Cancer	tumorigenesis	tumorigenesis of lymphoma	5.42E-05		0.915	ALK,ATM,BMI1,BRD2,CDK2,CDKN1A,CDKN1B,CDKN2C,CYP1B1,DCN,DMTF1,E2F1,E2F2,ETV6,KIF11,MAP3K8,MCL1,MDM4,MLH1,MSH2,MYC,NFKBIA,NQO1,NRAS,PBX1,PDGFRB,PIM1,PIM2,PMS2,PRF1,PRKDC,PTEN,PTPN1,RB1,REL,SKIL,TCF3,TNFSF10,TP53 (includes EG:22059),WWOX,XRCC5,XRCC6	42
Hematological Disease	tumorigenesis	tumorigenesis of lymphoma	5.42E-05		0.915	ALK,ATM,BMI1,BRD2,CDK2,CDKN1A,CDKN1B,CDKN2C,CYP1B1,DCN,DMTF1,E2F1,E2F2,ETV6,KIF11,MAP3K8,MCL1,MDM4,MLH1,MSH2,MYC,NFKBIA,NQO1,NRAS,PBX1,PDGFRB,PIM1,PIM2,PMS2,PRF1,PRKDC,PTEN,PTPN1,RB1,REL,SKIL,TCF3,TNFSF10,TP53 (includes EG:22059),WWOX,XRCC5,XRCC6	42
Immunological Disease	tumorigenesis	tumorigenesis of lymphoma	5.42E-05		0.915	ALK,ATM,BMI1,BRD2,CDK2,CDKN1A,CDKN1B,CDKN2C,CYP1B1,DCN,DMTF1,E2F1,E2F2,ETV6,KIF11,MAP3K8,MCL1,MDM4,MLH1,MSH2,MYC,NFKBIA,NQO1,NRAS,PBX1,PDGFRB,PIM1,PIM2,PMS2,PRF1,PRKDC,PTEN,PTPN1,RB1,REL,SKIL,TCF3,TNFSF10,TP53 (includes EG:22059),WWOX,XRCC5,XRCC6	42
RNA Post-Transcriptional Modification	splicing	splicing of mRNA	5.59E-05		0.423	CDC40 (includes EG:361859),CDC5L,CDK13,CELF3,CELF4,CELF6,CRNKL1,DBR1 (includes EG:323746),DDX39A,DDX39B,DHX38,GEMIN6,GEMIN7,HCFC1,HNRNPH3,HNRNPM,MBNL1,PHF5A,PIN1,PLRG1,PRPF19,PRPF31,RBM15B,RBM5,RSRC1,SCAF11,SF3A1,SF3A2,SF3B1,SFPQ,SLU7 (includes EG:10569),SNRNP70,SNRPC,SNRPD1,SNRPD2,SNW1,SOX6,SPI1 (includes EG:20375),SRPK2,SRSF1,SRSF2,SRSF4,SRSF6,SRSF7,TCERG1,TRA2A,TRA2B,TXNL4A,U2AF2,USP39,WDR83,Y…	52
Cell Morphology	cell rounding	cell rounding	5.60E-05		1.191	AGT,ARAP1,ARHGDIG,ARHGEF11,ARR3 (includes EG:170735),ARRB2,CDKN1B,CENPF,EDNRA,EDNRB,EFNA1,EFNA5,EFNB1,EPHB3,F2,GDPD2,GNA12,GNA13,GNAQ,HGF,HTR4,HTR7,IL8,LOC643751,MYOC,PARVB,PIP5K1A,PTPN11,PXN,RGS3,RHOA,RHOB,ROCK1,ROCK2,RRAS,S1PR2,S1PR3,SIPA1,SOD2,SPARC,TAOK1,TAOK2,TIAM1,TNF	44
Tissue Development	ossification	ossification	5.63E-05		-1.385	ACVR1,ACVR2A,ACVR2B,ADRB2,AHSG,ALOX15,ALPL,ANKH,ASPN,ATP6V0A4,ATP6V1B1,BGN,BMP2,BMP4,BMP6,BMP7,BMPR1A,BMPR1B,BMPR2,CALCB,CASP3,CBFB,CBS,CD276,CIITA,COL10A1,COL11A2,COL1A1,CSF1 (includes EG:12977),CTGF,CYP24A1,CYP27B1,DSPP,DUOX2,E2F1,ECM1 (includes EG:100332249),EGFR,EIF2AK3,ENPP1,ERCC2,ESRRA,EXT1,EXT2,FGF18,FGF2,FGFR2,FGFR3,FMOD,FOSL2,FOXC2,FOXO1 (includes EG:2308),GADD45B,GATA1,GJA1,HDAC5,HIF1A,…	114
Connective Tissue Development and Function	ossification	ossification	5.63E-05		-1.385	ACVR1,ACVR2A,ACVR2B,ADRB2,AHSG,ALOX15,ALPL,ANKH,ASPN,ATP6V0A4,ATP6V1B1,BGN,BMP2,BMP4,BMP6,BMP7,BMPR1A,BMPR1B,BMPR2,CALCB,CASP3,CBFB,CBS,CD276,CIITA,COL10A1,COL11A2,COL1A1,CSF1 (includes EG:12977),CTGF,CYP24A1,CYP27B1,DSPP,DUOX2,E2F1,ECM1 (includes EG:100332249),EGFR,EIF2AK3,ENPP1,ERCC2,ESRRA,EXT1,EXT2,FGF18,FGF2,FGFR2,FGFR3,FMOD,FOSL2,FOXC2,FOXO1 (includes EG:2308),GADD45B,GATA1,GJA1,HDAC5,HIF1A,…	114
Skeletal and Muscular System Development and Function	ossification	ossification	5.63E-05		-1.385	ACVR1,ACVR2A,ACVR2B,ADRB2,AHSG,ALOX15,ALPL,ANKH,ASPN,ATP6V0A4,ATP6V1B1,BGN,BMP2,BMP4,BMP6,BMP7,BMPR1A,BMPR1B,BMPR2,CALCB,CASP3,CBFB,CBS,CD276,CIITA,COL10A1,COL11A2,COL1A1,CSF1 (includes EG:12977),CTGF,CYP24A1,CYP27B1,DSPP,DUOX2,E2F1,ECM1 (includes EG:100332249),EGFR,EIF2AK3,ENPP1,ERCC2,ESRRA,EXT1,EXT2,FGF18,FGF2,FGFR2,FGFR3,FMOD,FOSL2,FOXC2,FOXO1 (includes EG:2308),GADD45B,GATA1,GJA1,HDAC5,HIF1A,…	114
Tissue Development	adhesion	adhesion of blood cells	5.65E-05		1.255	A2M,ADAM9,ADAMTS13,ADORA2A,ADRB2,AGER,AGT,ALOX12,ANGPT1,ANGPT2,APOA4,APOC3,APOE,APOH,APP,ATRN,AXL,B4GALT1,BTK,C3,C5,CBLB,CCL17,CCL20,CCL22,CCL25,CCL28,CCL5,CCNC,CCND1,CD14,CD151,CD200,CD36,CD4,CD40,CD46,CD47,CD48,CD55,CD58,CD59 (includes EG:25407),CD83,CD9,CDH1,CERCAM,CHST4,CMAH,CORO1A,CRP,CSF1 (includes EG:12977),CSF2,CSF2RB,CTTN,CXCL2,CXCL9,CXCR3,CXCR4,ERG,F11R,F2,F2R,FAS,FCER1G,FCGR1A,FGR,FLT1…	208
Cell-To-Cell Signaling and Interaction	adhesion	adhesion of blood cells	5.65E-05		1.255	A2M,ADAM9,ADAMTS13,ADORA2A,ADRB2,AGER,AGT,ALOX12,ANGPT1,ANGPT2,APOA4,APOC3,APOE,APOH,APP,ATRN,AXL,B4GALT1,BTK,C3,C5,CBLB,CCL17,CCL20,CCL22,CCL25,CCL28,CCL5,CCNC,CCND1,CD14,CD151,CD200,CD36,CD4,CD40,CD46,CD47,CD48,CD55,CD58,CD59 (includes EG:25407),CD83,CD9,CDH1,CERCAM,CHST4,CMAH,CORO1A,CRP,CSF1 (includes EG:12977),CSF2,CSF2RB,CTTN,CXCL2,CXCL9,CXCR3,CXCR4,ERG,F11R,F2,F2R,FAS,FCER1G,FCGR1A,FGR,FLT1…	208
Molecular Transport	nuclear export	nuclear export of molecule	5.70E-05		-1.852	AGFG1,CALR,CCHCR1,DDX19B,DDX25,DDX39A,DDX39B,EIF4E,EIF5A,FYTTD1,GLE1 (includes EG:2733),GSK3B,HHEX,HSPA9,KHDRBS1,NCBP1,NUDT4,NUP107,NUP133 (includes EG:234865),NUP160,NUP214,NUP98,NUPL2,NXF1,NXT1,PHAX,PTPN11,RAE1,SMG1,SMG5,SMG6,SMG7,STRADA,STRADB,THOC1,THOC2,THOC4,THOC5,THOC6,UHMK1,UPF1,UPF2,XPO1,XPO5,XPO6,XPOT	46
Cellular Assembly and Organization	neuritogenesis	neuritogenesis	5.77E-05		1.381	ABI2,ABL2,ACHE,ACTB,ACTR3,ADORA2A,AFG3L2,AGER,AGRN,AKAP5,ALS2,AMIGO1,APC,APOE,APP,ARHGEF25,ATL1,ATP7A,ATXN10,BACE1,BAIAP2,BASP1,BBS4,BDNF,BMP7,BRAF,BRSK1,BRSK2,BTG2,CACNA1A,CACNA1F,CAMK1D,CAPZB,CAV1,CDC20,CDH2,CDK5,CDK5R1,CELSR2,CHN1,CHRNA1,CHRNB2,CIT,CLU,CNP,CNTNAP1,CREB1,CRHR1,CRMP1,CSNK2A2,CSPG4,CYP19A1,CYTH2,DBN1,DICER1,DLX5,DNM1L,DOCK7,DPYSL2,DPYSL4,DRGX,DTNBP1,DVL1,DYNLT1,EFHD1,EFNA1,EFNA2,…	254
Tissue Development	neuritogenesis	neuritogenesis	5.77E-05		1.381	ABI2,ABL2,ACHE,ACTB,ACTR3,ADORA2A,AFG3L2,AGER,AGRN,AKAP5,ALS2,AMIGO1,APC,APOE,APP,ARHGEF25,ATL1,ATP7A,ATXN10,BACE1,BAIAP2,BASP1,BBS4,BDNF,BMP7,BRAF,BRSK1,BRSK2,BTG2,CACNA1A,CACNA1F,CAMK1D,CAPZB,CAV1,CDC20,CDH2,CDK5,CDK5R1,CELSR2,CHN1,CHRNA1,CHRNB2,CIT,CLU,CNP,CNTNAP1,CREB1,CRHR1,CRMP1,CSNK2A2,CSPG4,CYP19A1,CYTH2,DBN1,DICER1,DLX5,DNM1L,DOCK7,DPYSL2,DPYSL4,DRGX,DTNBP1,DVL1,DYNLT1,EFHD1,EFNA1,EFNA2,…	254
Nervous System Development and Function	neuritogenesis	neuritogenesis	5.77E-05		1.381	ABI2,ABL2,ACHE,ACTB,ACTR3,ADORA2A,AFG3L2,AGER,AGRN,AKAP5,ALS2,AMIGO1,APC,APOE,APP,ARHGEF25,ATL1,ATP7A,ATXN10,BACE1,BAIAP2,BASP1,BBS4,BDNF,BMP7,BRAF,BRSK1,BRSK2,BTG2,CACNA1A,CACNA1F,CAMK1D,CAPZB,CAV1,CDC20,CDH2,CDK5,CDK5R1,CELSR2,CHN1,CHRNA1,CHRNB2,CIT,CLU,CNP,CNTNAP1,CREB1,CRHR1,CRMP1,CSNK2A2,CSPG4,CYP19A1,CYTH2,DBN1,DICER1,DLX5,DNM1L,DOCK7,DPYSL2,DPYSL4,DRGX,DTNBP1,DVL1,DYNLT1,EFHD1,EFNA1,EFNA2,…	254
Molecular Transport	quantity	quantity of phospholipid	5.82E-05		1.087	ABCA1,ABCA3,ACP6,ACPP,ADA,AGPAT2,APOA1,APOE,APP,ARNT,BRMS1,C5,CASP9 (includes EG:100140945),CAV1,CBS,CEL,CYP27A1,DAB2IP,EEF1A2,F2,F2R,FAS,FCER1G,FIG4,GLB1,GNAQ,GNRH1,GOLPH3,GPAM,HGF,HTT,IL17RA,IL1B,IL6,IL8,INPP5D,INPP5E,INPPL1,INSR,KITLG,LCAT,LDLR,LGALS8,LPL,LSR,LYPLA2,MTM1,MTOR,NGF,NPC1,NR1H3,NR1H4,PCYT1A,PDCD6IP,PEMT,PHGDH,PIK3C3,PIK3CG,PIK3R1,PIKFYVE,PIP4K2A,PIP5K1A,PIP5K1C,PITPNB,PLA2G4A,PLA2…	96
Lipid Metabolism	quantity	quantity of phospholipid	5.82E-05		1.087	ABCA1,ABCA3,ACP6,ACPP,ADA,AGPAT2,APOA1,APOE,APP,ARNT,BRMS1,C5,CASP9 (includes EG:100140945),CAV1,CBS,CEL,CYP27A1,DAB2IP,EEF1A2,F2,F2R,FAS,FCER1G,FIG4,GLB1,GNAQ,GNRH1,GOLPH3,GPAM,HGF,HTT,IL17RA,IL1B,IL6,IL8,INPP5D,INPP5E,INPPL1,INSR,KITLG,LCAT,LDLR,LGALS8,LPL,LSR,LYPLA2,MTM1,MTOR,NGF,NPC1,NR1H3,NR1H4,PCYT1A,PDCD6IP,PEMT,PHGDH,PIK3C3,PIK3CG,PIK3R1,PIKFYVE,PIP4K2A,PIP5K1A,PIP5K1C,PITPNB,PLA2G4A,PLA2…	96
Small Molecule Biochemistry	quantity	quantity of phospholipid	5.82E-05		1.087	ABCA1,ABCA3,ACP6,ACPP,ADA,AGPAT2,APOA1,APOE,APP,ARNT,BRMS1,C5,CASP9 (includes EG:100140945),CAV1,CBS,CEL,CYP27A1,DAB2IP,EEF1A2,F2,F2R,FAS,FCER1G,FIG4,GLB1,GNAQ,GNRH1,GOLPH3,GPAM,HGF,HTT,IL17RA,IL1B,IL6,IL8,INPP5D,INPP5E,INPPL1,INSR,KITLG,LCAT,LDLR,LGALS8,LPL,LSR,LYPLA2,MTM1,MTOR,NGF,NPC1,NR1H3,NR1H4,PCYT1A,PDCD6IP,PEMT,PHGDH,PIK3C3,PIK3CG,PIK3R1,PIKFYVE,PIP4K2A,PIP5K1A,PIP5K1C,PITPNB,PLA2G4A,PLA2…	96
Cellular Assembly and Organization	fusion	fusion of cellular membrane	5.87E-05		0.210	ADAM8,ANXA7,BNIP1,CTBP1,GOSR2,MYO1C,NAPG,NPLOC4,NSF,NSFL1C,OTOF,PLD1,PLDN,PRF1,PSAP,RABEP1,RABIF,SEC22B,SNAP23,SNAP29,STAP1,STX11,STX3,STX4,TIE1,USO1,VAMP2,VAMP3,VAMP8,VAPA,VCPIP1,VPS33B,VTI1B	33
Protein Synthesis	translation	translation of protein	5.92E-05		0.604	ACO1,APP,CALR,CKAP5,CNOT7,CPEB1,CTIF,CYP1A1,DARS,DDX25,DDX6,DHPS,DICER1,DROSHA,DUS2L,EGFR,EIF2A,EIF2AK1,EIF2AK2,EIF2AK3,EIF2AK4,EIF2B1,EIF2B2,EIF2B3,EIF2B4,EIF2B5,EIF2C2,EIF2S2,EIF2S3,EIF3B,EIF3D,EIF3E,EIF3F,EIF3G,EIF3H,EIF3I,EIF3K,EIF3L,EIF4A3,EIF4B,EIF4E,EIF4EBP1,EIF4EBP2,EIF4G2,EIF4G3,EIF5,ERN1,FMR1,FXR1,GNB2L1,GRB7,GTF2H2,GTF2H3,HBS1L,HNRNPK,HSPA5,HSPB1,IGF2BP2,IGF2BP3,IGFBP5,IMPACT,IREB2,IRS…	117
Cell Death	apoptosis	initiation of apoptosis	5.94E-05		-1.008	ACVR1B,AIFM2,AIFM3,ALOX15B,APOE,APP,BAD,BCL10,BCLAF1,BNIP1,BNIP3,BNIPL,BOK,C16orf5,C5,C7,C9,CASP2,CASP3,CASP4,CASP6,CASP7,CASP9 (includes EG:100140945),CD27,CDKN1B,CDKN2C,CIDEB,CIDEC,COL4A3,CYCS,DAPK1,DAPK3,DAXX,DDX19A,DDX20,DEDD,DFFA,DFFB,DIABLO,DPF1,DPF2,DRAM2,EAF2,EI24,EIF5A,ERCC2,ERCC3,ERN1,ETS1,EXOC2,FAS,FOXO3,GSDMA,GSK3B,GSN,HIP1 (includes EG:176224),HTATIP2,Ikbip,IL19,INHA,INHBA,ITM2B,ITM2…	142
Protein Trafficking	targeting	targeting of protein	6.06E-05			AGXT,AIP,AP1M2,AP3B1,AP3M1,ATG4C,CACNB1,CALR,CCHCR1,CDC37,DUSP18,EIF5A,ERBB2IP,FOLR2,GABARAP,GCC2,GIPC1,GPHN,GSK3B,HSPA9,KIF13B,LHCGR,LTBP2,MLPH,MYO6,NAGPA,NBEA,NCF1,NEDD4,NLGN1,NUP214,NUPL2,NXT1,OPTN,PACS1,PARD3,PEX1 (includes EG:463532),PEX16,PEX19,PEX5,PEX7 (includes EG:18634),PICK1,PML,PPP1R3C,PTPN11,RAB6A,RTP3,SCARB2,SEC63 (includes EG:11231),SNX16,STRADA,STRADB,STXBP4,SYNGR2,SYNJ2BP,TIMM10,…	79
Neurological Disease	spinal cord disorder	spinal cord disorder	6.27E-05		-0.895	ABCB7,ABCG2,ADCK3,ADORA2A,AGER,AHR,ALCAM,ALDH5A1,ALS2,ARR3 (includes EG:170735),ARRB1,ATL1,ATM,ATXN1,ATXN10,ATXN3,ATXN7,BCL2L1,BSCL2,C10orf2,C10orf54,C3,C3AR1,CACNA1A,CACNA2D1,CACNA2D2,CACNA2D4,CASP3,CASP4,CBLB,CCBP2,CCR6,CD200,CD274,CD276,CD4,CD40,CD80 (includes EG:12519),CD86,CHRM1,CHRM4,CHRM5,CHRNA7,CHRNB2,CNGA1,CORO1A,CRP,DLL4,DPP4,DUSP1,DUSP10,EIF2AK3,ELF1,EPO,EPOR,ESR2,F2RL1,FAS,FXN,GABBR1,…	206
Gene Expression	repression	repression of RNA	6.42E-05		-0.685	AR,ARID4B,BCAT2,BCL6,BCL6B,BRCA1,C19orf2,CBFA2T3,CBFB,CBX2,CBX5,CCND1,CDKN2C,COPS2,CTBP1,CTBP2,CUL3 (includes EG:26554),DAXX,DDX20,DNMT1,DR1,EED,ELL,ETV3,FHL2,FOSB,FOXP3,HDAC1,HDAC10,HDAC3,HDAC7,HDAC9,HESX1,HIF1A,HMGB2,HR,IL6,ING1,JUN,KAT5,KDM5B,LCOR,LRCH4,MAFG,MAX,MBD1,MCRS1,MECOM,MECP2,MXI1,MYH11,NAMPT,NIF3L1,NR1D2,NR2F1,NR2F2,NR3C1,NR4A2,PAK1,PAWR,PAX9,PHB,PIAS2,PML,PRDM16,RARA,RB1,RBBP8,RBPJ,…	89
Cancer	transformation	transformation of fibroblasts	6.54E-05		-0.259	ALK,ATIC,AURKA,BCAR1,BRCA1,CBL,CCND1,CCND2,CCND3,CDC25B,CDK4,CDKN1A,COL1A2,DAPK1,ETV6,EWSR1,FLI1,FOXM1,FXN,GAB2,GRB10,HTATIP2,ID2,JAK2,JDP2,JUN,KRAS,KSR1,MCRS1,MDM4,MEN1,MIF,MNT,MPL,MXD1,MYC,NPPA,PES1,PRDX1,PTEN,RB1,RCE1 (includes EG:19671),RRAS2,RUNX1,SHC1 (includes EG:20416),SKIL,SKP2 (includes EG:27401),SOCS1,SRC,STAT5A,TERT,THPO,THRA,TP53 (includes EG:22059),TP63,TP73,TPR,TRRAP,UBTF,USF1,USF2	61
Cellular Development	maturation	maturation of cells	6.78E-05		1.493	ABCG2,ABL1,ACHE,ADAM17,AGPAT6,AHR,APP,ARNT,ATF3,ATM,BCL2L1,BDNF,BFSP1,BFSP2,BIRC5,BLNK,BMP2,BTC,BTK,CADM1,CAMK2A,CAMP,CARD11,CBFB,CCL5,CCND1,CCND2,CCND3,CCR7,CD247,CD4,CD40,CD47,CD80 (includes EG:12519),CD83,CD86,CDC25B,CDKN1A,CDKN1C,CEBPE,CHUK,CSF1 (includes EG:12977),CSF2,CSK,CTNNB1,CXCR4,CYP51A1,DMC1,E2F1,E2F2,E2F3,EGR1,EIF2AK1,EPAS1,EPO,ERCC2,ESRRA,EWSR1,FAS,FCGR2B,FEM1B,FGF2,FGFR1,FHL2,FLT3L…	188
Cancer	sarcoma	sarcoma	6.84E-05		-1.023	ABL1,ACP5,ADM,AFAP1L1,ALDH5A1,ALK,AMY2A,ANGPTL4,APC,ASPSCR1,ASS1,AURKB,BCR,BMI1,BRAF,BRCA1,CDH1,CDK1,CDK12,CDK19,CDK2,CDK3,CDK4,CDK5,CDK6,CDK7,CDKN1A,CDKN2B,CDKN2D,CELA1,CHEK1,CHEK2,CHRNA1,CHRNA10,CHRNA5,CHRNA7,CHRNA9,CHRNB1,CHRNB2,CHRND,CHRNE,CHRNG,CLK2,CLK4,CRABP2,CSF1R,CTNNB1,CYP19A1,CYP1B1,DDB2,DHFR,DHODH,DIAPH3,EGFR,EPHA2,EPHB2,ERCC2,EWSR1,EXT1,FDFT1,FGFR1,FGFR2,FGFR3,FKBP1A,FLI1,FLT1,FLT3,F…	207
Cell Death	cell death	cell death of thymocytes	6.89E-05		0.219	ABL1,ADA,ADORA2A,ADRB1,ATM,BAD,BAK1,BCL2L1,BIRC5,BMF,BMP4,BRCA1,CASP3,CASP8,CASP9 (includes EG:100140945),CD3E,CDK2,CDKN1A,CHEK1,CHEK2,CHUK,CTNNB1,DDIT4,DFFA,DNAJA3,E2F1,EGR1,EGR3,ETS2,FADD,FAS,FOS,FYN,GFI1,GZMA,HIST1H1C,HOXA3,ID3 (includes EG:15903),IKBKB,IL7,JUN,KIFAP3,LGALS1,MAP3K2,MAPK8,MAPK9,MCL1,MXD3,MYC,NFKBID,NQO1,NQO2,NR3C1,NR4A1,NR5A1,PARP1,PERP,PIK3CD,PIK3CG,PRKDC,PTPRC,RIPK1,RNASEL,RO…	82
Cellular Function and Maintenance	cytostasis	cytostasis of tumor cell lines	6.96E-05	Increased	2.017	ABL1,ADRBK1,BCL6,BCR,BHLHE40,BIRC5,BMP2,BMP4,BMP6,BMP7,BMPR1A,BMPR1B,BRCA1,CAMK2A,CAV1,CBS,CCND1,CCND3,CD40,CDCA8,CDH1,CDKN1A,CDKN1B,CHEK2,CLU,CRABP2,CTNNB1,CYR61,EGFR,EIF2AK2,ERBB3,ETS1,FGFR1,FHIT,FOXO3,GLI1,GPI,IGF1R,IL4 (includes EG:16189),IL6,IL6R,INO80B,IRF2,JAG1,LIF,MADD,MAP2K6,MAPK14,MKNK1,MXD1,MXI1,MYCBP,NGF,NME3,NR1I2,NR2F1,NR3C1,NTRK1,PADI4,PER1,PFDN5,PPP1R15A,PRKAR1A,PRKAR2B,PRMT1,PTEN…	97
Skeletal and Muscular Disorders	juvenile rheumatoid arthritis	juvenile rheumatoid arthritis	7.04E-05			ACLY,ADM,ALB,ALOX12,ALOX5,ANG,APOA1,APOE,BCL6,BTC,C18orf10,CCL5,CCR4,CD274,CD80 (includes EG:12519),CD83,CD86,CDA,CDH1,CLIC2,COL10A1,CYP19A1,DEK,DNM1,DYNLL1,EEF2,F11R,FES,FOS,FOSB,GADD45B,GHR,GSR,GZMA,HDAC7,HLA-DRA,HP,HSPB8,IL17RA,IL1A,IL1B,IL1R1,IL1RN,IL2RA,IL6,IL6R,LGALS1,MAPK3,MCL1,MIF,MME,MMP2,NCF4,NFKBIA,NR4A1,NR4A2,NUMB,OSM,PECAM1,PLAUR,PRDM1,PRNP,PTGS1,PTPRC,RALB,RGL2,RPL32,RPSA,S100A10,S1…	87
Connective Tissue Disorders	juvenile rheumatoid arthritis	juvenile rheumatoid arthritis	7.04E-05			ACLY,ADM,ALB,ALOX12,ALOX5,ANG,APOA1,APOE,BCL6,BTC,C18orf10,CCL5,CCR4,CD274,CD80 (includes EG:12519),CD83,CD86,CDA,CDH1,CLIC2,COL10A1,CYP19A1,DEK,DNM1,DYNLL1,EEF2,F11R,FES,FOS,FOSB,GADD45B,GHR,GSR,GZMA,HDAC7,HLA-DRA,HP,HSPB8,IL17RA,IL1A,IL1B,IL1R1,IL1RN,IL2RA,IL6,IL6R,LGALS1,MAPK3,MCL1,MIF,MME,MMP2,NCF4,NFKBIA,NR4A1,NR4A2,NUMB,OSM,PECAM1,PLAUR,PRDM1,PRNP,PTGS1,PTPRC,RALB,RGL2,RPL32,RPSA,S100A10,S1…	87
Inflammatory Disease	juvenile rheumatoid arthritis	juvenile rheumatoid arthritis	7.04E-05			ACLY,ADM,ALB,ALOX12,ALOX5,ANG,APOA1,APOE,BCL6,BTC,C18orf10,CCL5,CCR4,CD274,CD80 (includes EG:12519),CD83,CD86,CDA,CDH1,CLIC2,COL10A1,CYP19A1,DEK,DNM1,DYNLL1,EEF2,F11R,FES,FOS,FOSB,GADD45B,GHR,GSR,GZMA,HDAC7,HLA-DRA,HP,HSPB8,IL17RA,IL1A,IL1B,IL1R1,IL1RN,IL2RA,IL6,IL6R,LGALS1,MAPK3,MCL1,MIF,MME,MMP2,NCF4,NFKBIA,NR4A1,NR4A2,NUMB,OSM,PECAM1,PLAUR,PRDM1,PRNP,PTGS1,PTPRC,RALB,RGL2,RPL32,RPSA,S100A10,S1…	87
Immunological Disease	juvenile rheumatoid arthritis	juvenile rheumatoid arthritis	7.04E-05			ACLY,ADM,ALB,ALOX12,ALOX5,ANG,APOA1,APOE,BCL6,BTC,C18orf10,CCL5,CCR4,CD274,CD80 (includes EG:12519),CD83,CD86,CDA,CDH1,CLIC2,COL10A1,CYP19A1,DEK,DNM1,DYNLL1,EEF2,F11R,FES,FOS,FOSB,GADD45B,GHR,GSR,GZMA,HDAC7,HLA-DRA,HP,HSPB8,IL17RA,IL1A,IL1B,IL1R1,IL1RN,IL2RA,IL6,IL6R,LGALS1,MAPK3,MCL1,MIF,MME,MMP2,NCF4,NFKBIA,NR4A1,NR4A2,NUMB,OSM,PECAM1,PLAUR,PRDM1,PRNP,PTGS1,PTPRC,RALB,RGL2,RPL32,RPSA,S100A10,S1…	87
Cell Death	cell death	cell death of cancer cells	7.28E-05		1.119	ABL1,AGAP2,AKT1S1,AKT2,ALB,ANPEP,APP,AR,ATF2,ATP7B,B4GALT5,BCL2L1,BCL2L2,BDNF,BIRC5,BOK,BRCA1,BUB1B,CASP2,CASP3,CASP8,CASP9 (includes EG:100140945),CAT,CD40,CDC25B,CDC45,CDC6 (includes EG:23834),CDH1,CDKN1A,CDKN1B,CFLAR,CLU,CSF1 (includes EG:12977),CSF2,CTSB,DAXX,DDIT3,DIABLO,DNMT3B,EGFR,EIF2AK3,EMP2,ENO1,EPO,ETS1,FADD,FAS,FHIT,FLT3LG,FOXO4,GAB2,GLI1,GSK3B,HIPK2,HMOX1,HSPB8,IGF1R,IL15 (includes E…	113
Cellular Growth and Proliferation	growth	growth of blood cells	7.34E-05		-0.663	ABL1,ACHE,AFAP1L1,AHR,BCR,BIRC5,BTK,C3,CBL,CBX2,CCNA2,CCND1,CCND2,CCND3,CCR6,CCR7,CD14,CD163,CD180,CD27,CD3E,CD4,CD40,CD72,CD80 (includes EG:12519),CD86,CDKN1A,CDKN1B,CDKN2D,CREB1,CSF1 (includes EG:12977),CSF2,CTNNB1,DICER1,DLL4,E2F4,EGFR,EGR1,EPAS1,EPO,FANCC,FAS,FLT3,FLT3LG,FOXO3,GAB2,GATA1,GATA2,GFI1B,HIF1A,HOXB4,ICOSLG,IFNAR1,IKBKB,IL10RA,IL15 (includes EG:16168),IL18 (includes EG:16173),IL1A,…	138
Cellular Development	growth	growth of blood cells	7.34E-05		-0.663	ABL1,ACHE,AFAP1L1,AHR,BCR,BIRC5,BTK,C3,CBL,CBX2,CCNA2,CCND1,CCND2,CCND3,CCR6,CCR7,CD14,CD163,CD180,CD27,CD3E,CD4,CD40,CD72,CD80 (includes EG:12519),CD86,CDKN1A,CDKN1B,CDKN2D,CREB1,CSF1 (includes EG:12977),CSF2,CTNNB1,DICER1,DLL4,E2F4,EGFR,EGR1,EPAS1,EPO,FANCC,FAS,FLT3,FLT3LG,FOXO3,GAB2,GATA1,GATA2,GFI1B,HIF1A,HOXB4,ICOSLG,IFNAR1,IKBKB,IL10RA,IL15 (includes EG:16168),IL18 (includes EG:16173),IL1A,…	138
Cell Death	apoptosis	apoptosis of liver	7.52E-05		1.109	ADM,AHR,ATF7,BAK1,BCL2L1,CASP3,CASP7,CASP8,CASP9 (includes EG:100140945),CD274,CD40,CDKN1A,CHUK,CIT,CTSB,CYP7A1,DAXX,DICER1,EGFR,ENDOG,EPO,FAS,GADD45B,GSK3B,HGF,IKBKB,IL4 (includes EG:16189),IL6,IL6ST,IRF2,IRF5,ITGAV,ITGB3,JUN,MAP2K1,MAP2K4,MAPK14,MAPK8,MAPK9,MCL1,MET,MMP9,MTOR,MYC,MYD88,NCF1,NFE2L1,NFKB1,NGF,NOS2,NPC1,NR0B2,NR1H4,NR1I3,OSM,PTGER1,PTPN1,PTPRC,RB1,RBCK1,SMAD3,SMPD1,SOCS3,SOD2,STAT…	80
Cellular Development	differentiation	differentiation of pheochromocytoma cell lines	7.56E-05		0.240	ACVR1C,ADRB1,AKAP5,BEX2,BTG2,CDKN1A,COL18A1,CRK,DYRK1A,ELAVL3,ERBB2IP,FEZ1,FGF2,FGFR1,FOS,FOSL1,FRS2,GCNT1,HES1 (includes EG:15205),IL17RD,IL6,JUN,KRAS,LIMK2,MAGEH1,MATK,MRAS,NAB2 (includes EG:100005680),NDN,NGF,NTRK1,PA2G4,PAQR3,PDGFRB,PLAGL1,PLAUR,PPP1CA,PTPN11,RASGRP1,RBL2 (includes EG:100331892),RRAS2,SH2B1,SH2B2,SPRY2,SPRY4,SRC,TFAP2A,TFAP2B,TNF,TNFRSF1A,TNFRSF1B,TP53 (includes EG:22059),TP7…	55
Cancer	uterine cancer	uterine cancer	7.57E-05		-0.517	ABCG2,ABI2,ABL1,ACTC1,ACTG2,ACTR3,ADAMTS5,AGPAT2,AHR,AK2,AKAP8L,AKR1B1,AKT3 (includes EG:10000),ALDH1A1,ALDOA,ANAPC10,ANTXR2,ANXA5,APOLD1,AR,ARFGEF2,ARHGDIB,ARIH2,ARL4D,ARNT,ARSE,ASB5,ASH2L,ATRN,ATRNL1,AURKB,BCL10,BCR,BDH1 (includes EG:100037356),BNC2,BRF1 (includes EG:2972),BTRC,C18orf1,C9orf86,CA9,CALCRL,CAPN6,CAV1,CBL,CBX7,CD97,CD99L2,CDC7 (includes EG:12545),CDH1,CDH13,CDH2,CDH3,CDH4,CDK1,CDK…	402
Reproductive System Disease	uterine cancer	uterine cancer	7.57E-05		-0.517	ABCG2,ABI2,ABL1,ACTC1,ACTG2,ACTR3,ADAMTS5,AGPAT2,AHR,AK2,AKAP8L,AKR1B1,AKT3 (includes EG:10000),ALDH1A1,ALDOA,ANAPC10,ANTXR2,ANXA5,APOLD1,AR,ARFGEF2,ARHGDIB,ARIH2,ARL4D,ARNT,ARSE,ASB5,ASH2L,ATRN,ATRNL1,AURKB,BCL10,BCR,BDH1 (includes EG:100037356),BNC2,BRF1 (includes EG:2972),BTRC,C18orf1,C9orf86,CA9,CALCRL,CAPN6,CAV1,CBL,CBX7,CD97,CD99L2,CDC7 (includes EG:12545),CDH1,CDH13,CDH2,CDH3,CDH4,CDK1,CDK…	402
Cellular Movement	migration	migration of fibroblasts	7.59E-05		-0.473	ABL1,ABL2,AGER,AGT,AKT2,APOE,ARHGAP35,BCAR1,CALCRL,CAPNS1,CAV1,CCND1,CDKN1A,CDKN1B,DAPK3,DDR2 (includes EG:18214),FGF1,FGF2,FLNB,GNA12,GNA13,HBEGF,HGF,IGBP1,ITGB1BP1,ITGB3,LPP,LRPAP1,MAP2K1,MAP3K1,MAP3K8,MAPK14,MAPKAPK2,MRAS,MRC2,MYC,PIP5K1A,PLAUR,PRKACA,PRKAR1A,PRKCD,PTPN2,PTPRA,PXN,RAC1,RAC2,RAMP2,RAMP3,RAP2A,RAPGEF1,RAPGEF3,RASGRP1,SCHIP1,SDC4,SGPL1,SPP1 (includes EG:20750),TGFB3,TGFBR2,THBS1,…	66
Connective Tissue Development and Function	migration	migration of fibroblasts	7.59E-05		-0.473	ABL1,ABL2,AGER,AGT,AKT2,APOE,ARHGAP35,BCAR1,CALCRL,CAPNS1,CAV1,CCND1,CDKN1A,CDKN1B,DAPK3,DDR2 (includes EG:18214),FGF1,FGF2,FLNB,GNA12,GNA13,HBEGF,HGF,IGBP1,ITGB1BP1,ITGB3,LPP,LRPAP1,MAP2K1,MAP3K1,MAP3K8,MAPK14,MAPKAPK2,MRAS,MRC2,MYC,PIP5K1A,PLAUR,PRKACA,PRKAR1A,PRKCD,PTPN2,PTPRA,PXN,RAC1,RAC2,RAMP2,RAMP3,RAP2A,RAPGEF1,RAPGEF3,RASGRP1,SCHIP1,SDC4,SGPL1,SPP1 (includes EG:20750),TGFB3,TGFBR2,THBS1,…	66
Cell Cycle	interphase	arrest in interphase of fibroblasts	7.88E-05			ABL1,ATF2,ATM,C11orf82,CCND1,CD247,CDC25C,CDKN1A,CHEK1,CHEK2,E2F1,E2F2,E2F3,E2F4,GADD45A,MAP3K5,MAPK3,MBD4,MYBL2,MYC,NBN,PARP1,POLK,PRKDC,RB1,SMARCA2,SRSF2,TFDP1,TP53 (includes EG:22059),TPP2	30
Cell Death	cell death	cell death of leukocyte cell lines	7.92E-05		-0.998	ABL1,BAD,BAK1,BCL2A1,BCL2L1,BCL3,BCR,BIRC5,BMP2,CASP3,CASP8,CASP9 (includes EG:100140945),CBFB,CCL5,CCND2,CD3E,CD40,CD8A,CDKN1A,CDKN1B,CFLAR,CSF2,CSNK2A2,DAPK1,DAXX,DDIT3,E2F1,EGFR,EPO,ETV6,FADD,FAIM,FAS,FCER1A,FGFR1,FIP1L1,FLT3,FOXO3,GADD45B,GATA1,GCNT1,GGT1,GHR,GRID2,HCLS1,HES1 (includes EG:15205),IFIH1,IL15 (includes EG:16168),IL4 (includes EG:16189),IL6,IL7,INHBA,IRF4,ITGA5,ITGB1,JAK2,JUN,KIT…	119
Nervous System Development and Function	development	development of central nervous system	8.08E-05		0.765	ABL1,ADAM19,ADORA2A,AGTPBP1,AKTIP,ALDH3A2,ALDH5A1,APLP2,APP,ARHGAP35,ARNT2,ARSA,ARSB,ATM,ATN1,ATP2B2,ATRX,B3GNT5,BAG6,BBS2,BBS4,BCAN,BCR,BDNF,BMI1,BMP2,BMP4,BMP7,BPTF,BTD,C11orf9,C1orf187,CACNA1A,CASP2,CASP3,CASP9 (includes EG:100140945),CBS,CCND1,CCND2,CCNF,CDK5,CDK5R1,CDK5R2,CDK5RAP1,CDK5RAP2,CDK6,CDKN1B,CDON,CELSR1,CEP120,CEP290,CERS1,CHD7,CHRD,CHRNB2,CHST3,CIT,CITED2,CNBP,CREB1,CSNK2B,CST3,CT…	329
Cell Cycle	interphase	interphase of cervical cancer cell lines	8.17E-05		-0.674	CCNA2,CDC25A,CDC25C,CDKN1B,CHEK1,COPS2,CSE1L,DTD1,FOXM1,GADD45A,GORASP2,H2AFX,LATS2,MAP2K6,MASTL,MCM10 (includes EG:307126),MPG,NASP,NRIP1,PITX2,PLK1,PML,POLA1,POLH,PPP2CB,PPP2R2A,PSEN1,PSEN2,REV3L,RPA1,SNX33,SPRY2,STK38,STK38L,TCP1,TERF1,TNF,TRIM21,VPS18,XPA,XPC	41
Molecular Transport	transport	transport of inorganic cation	8.18E-05		0.977	ABCC8,ACCN3,ADRA2A,ADRB1,ADRB2,AGT,ANXA6,AP3B1,AP3D1,AQP1,ATOX1,ATP12A,ATP1A1,ATP1A2,ATP1A4,ATP1B1,ATP1B3,ATP1B4,ATP2A1,ATP2A2,ATP2A3,ATP2B1,ATP2B2,ATP2B4,ATP2C1,ATP2C2,ATP5B,ATP5D,ATP5L,ATP6V0A4,ATP6V0B,ATP6V0E1,ATP6V1B1,ATP6V1B2,ATP6V1E1,ATP6V1E2,ATP6V1G2,ATP7A,ATP7B,C16orf7,CA2,CACNA1A,CACNA1B,CACNA1E,CACNA1G,CACNA1H,CACNA2D1,CACNA2D2,CACNB1,CACNB2,CACNB3,CACNB4,CAMK2A,CAMK2D,CAMK2G,CATSPER3,C…	190
Cellular Movement	migration	migration of connective tissue cells	8.21E-05		0.256	ABL1,ABL2,AGER,AGT,AKT2,APOE,ARHGAP35,BCAR1,CALCRL,CAPNS1,CAV1,CBL,CCL5,CCND1,CCR7,CDKN1A,CDKN1B,CSF1 (includes EG:12977),CTGF,DAPK3,DDR2 (includes EG:18214),DNM2,FGF1,FGF2,FLNB,GNA12,GNA13,HBEGF,HGF,IGBP1,ITGB1BP1,ITGB3,LGALS1,LPP,LRPAP1,MAP2K1,MAP3K1,MAP3K8,MAPK14,MAPKAPK2,MRAS,MRC2,MYC,NCF1,PIP5K1A,PLAU,PLAUR,PRKACA,PRKAR1A,PRKCD,PTPN2,PTPRA,PXN,RAC1,RAC2,RAMP2,RAMP3,RAP2A,RAPGEF1,RAPGEF3,RASG…	78
Carbohydrate Metabolism	quantity	quantity of carbohydrate	8.37E-05	Increased	2.049	ABCA1,ABCA3,ABCC1,ABCC8,ACP6,ACPP,ACVR2A,ACVR2B,ADA,ADIPOR1,ADIPOR2,ADM,ADRA1B,ADRA2A,AGPAT2,AGT,AKT2,ALB,AMBP,APOE,APP,ARNT,ATP2A2,ATP2B2,BDKRB2,BDNF,BRMS1,BTC,C3,C5,CASP9 (includes EG:100140945),CAV1,CD36,CEL,CHST1,CHST6,CHSY3,CKM,CREB1,CREBBP,CRTC2,DAB2IP,DGAT2,EEF1A2,ELOVL5,F2,F2R,FABP3,FABP4,FAS,FCER1G,FGF21,FIG4,FKBP1B,FOXA1,FOXO1 (includes EG:2308),GAL,GBP5,GCK,GFPT1,GHR,GIPR,GNAQ,GNRH1,GP…	184
Tissue Development	tubulation	tubulation of endothelial cells	8.61E-05		0.290	ANGPTL4,AXL,COL4A3,EDN1,EDNRB,ESAM,FGF2,G6PD,GBP1,HGF,ID1,IGFBP3,MGP,NPPA,NPPC,OLR1,PLEKHG5,PRKCA,PRL,RHOB,RHOJ,SRC	22
Cellular Development	tubulation	tubulation of endothelial cells	8.61E-05		0.290	ANGPTL4,AXL,COL4A3,EDN1,EDNRB,ESAM,FGF2,G6PD,GBP1,HGF,ID1,IGFBP3,MGP,NPPA,NPPC,OLR1,PLEKHG5,PRKCA,PRL,RHOB,RHOJ,SRC	22
Cardiovascular System Development and Function	tubulation	tubulation of endothelial cells	8.61E-05		0.290	ANGPTL4,AXL,COL4A3,EDN1,EDNRB,ESAM,FGF2,G6PD,GBP1,HGF,ID1,IGFBP3,MGP,NPPA,NPPC,OLR1,PLEKHG5,PRKCA,PRL,RHOB,RHOJ,SRC	22
Organismal Development	tubulation	tubulation of endothelial cells	8.61E-05		0.290	ANGPTL4,AXL,COL4A3,EDN1,EDNRB,ESAM,FGF2,G6PD,GBP1,HGF,ID1,IGFBP3,MGP,NPPA,NPPC,OLR1,PLEKHG5,PRKCA,PRL,RHOB,RHOJ,SRC	22
Cell Morphology	tubulation	tubulation of endothelial cells	8.61E-05		0.290	ANGPTL4,AXL,COL4A3,EDN1,EDNRB,ESAM,FGF2,G6PD,GBP1,HGF,ID1,IGFBP3,MGP,NPPA,NPPC,OLR1,PLEKHG5,PRKCA,PRL,RHOB,RHOJ,SRC	22
Infectious Disease	replication	replication of Retroviridae	8.66E-05	Increased	2.844	ACTL6B,AGFG1,APOBEC3B,ARNTL,BST2,CAPN3,CCL22,CCL5,CCNK,CCNT1,CD4,CIITA,CLDN3,CREB3,CTBP1,EPAS1,EXOSC5,FGF7,GALC,HCK,HOXA7,HTR4,IL1B,IL4 (includes EG:16189),IL6,IL8,LCK,MYC,NCOA3,NFKB1,NGF,NR2F1,NRF1,PDCD6IP,PIKFYVE,PLA2G10,PLD1,PLD2,PLIN3,PPP1R8,PRMT3,PSIP1,PTPRC,RAB11A,RAB9A,RABEPK,S100A12,S100A8,S100A9,SNX10,SOCS1,SOCS3,STXBP2,TGFB2,TGFB3,TLR2,TLR4,TLR8,TLR9,TNF,TNFSF10,TRIM5	62
Cellular Function and Maintenance	transmembrane potential	transmembrane potential	8.67E-05		-0.174	ABCB5,ABCD3,ABL1,ACCN2,ADORA2A,AIFM3,ALOX15,AP2A2,APP,ARID1A,ATP2A1,BAK1,BARD1,BCL2L1,BCR,BIRC5,BNIP3,CACNA1A,CAMP,CASP2,CASP3,CASP7,CASP8,CASP9 (includes EG:100140945),CAT,CAV3,CCNT1,CD27,CD4,CD40,CD47,CDK2,CDKN1A,CFLAR,CHEK2,CHMP5,CHRNA1,CHRNA7,CHRNB1,CHRNB2,CHRND,CHRNE,CHRNG,CLEC11A,DDIT3,DFFA,DIABLO,DLD,DNAJB1,EBAG9,EPO,ESR2,FADD,FAS,FGF2,FXN,GLRB,GPD2,GPR132,GRIK2,GRIN2A,GRIN2C,GSN,GZMA,GZMK…	151
Cell Morphology	transmembrane potential	transmembrane potential	8.67E-05		-0.174	ABCB5,ABCD3,ABL1,ACCN2,ADORA2A,AIFM3,ALOX15,AP2A2,APP,ARID1A,ATP2A1,BAK1,BARD1,BCL2L1,BCR,BIRC5,BNIP3,CACNA1A,CAMP,CASP2,CASP3,CASP7,CASP8,CASP9 (includes EG:100140945),CAT,CAV3,CCNT1,CD27,CD4,CD40,CD47,CDK2,CDKN1A,CFLAR,CHEK2,CHMP5,CHRNA1,CHRNA7,CHRNB1,CHRNB2,CHRND,CHRNE,CHRNG,CLEC11A,DDIT3,DFFA,DIABLO,DLD,DNAJB1,EBAG9,EPO,ESR2,FADD,FAS,FGF2,FXN,GLRB,GPD2,GPR132,GRIK2,GRIN2A,GRIN2C,GSN,GZMA,GZMK…	151
Cellular Movement	migration	migration of muscle cells	9.06E-05		1.422	ADM,AGER,AGT,APOE,BMP2,BMPR2,CALCRL,CCL5,CD47,CDKN1B,CLIC4,COMP,CSF2,CTSL2,CYP2J2,ELN,F2,F2R,FBLN5,FGF2,FGFR1,FOXO1 (includes EG:2308),FOXO4,FURIN,GAB1,GIT1 (includes EG:216963),HBEGF,IGFBP2,IGFBP4,IGFBP5,IL18 (includes EG:16173),IL1A,IL1B,IL6,ITGB1,ITGB5,LDLR,LPAR1,LPAR2,LTA,MAPKAPK2,MET,MMP7,MMP9,MYC,NFE2L2,NGF,NOX1,NQO1,PDGFRB,PLAT,PLAU,PLAUR,POLDIP2,PROC,PTGER4,PTPRF,RAC1,RAMP2,RAMP3,S100A4,S…	69
Skeletal and Muscular System Development and Function	migration	migration of muscle cells	9.06E-05		1.422	ADM,AGER,AGT,APOE,BMP2,BMPR2,CALCRL,CCL5,CD47,CDKN1B,CLIC4,COMP,CSF2,CTSL2,CYP2J2,ELN,F2,F2R,FBLN5,FGF2,FGFR1,FOXO1 (includes EG:2308),FOXO4,FURIN,GAB1,GIT1 (includes EG:216963),HBEGF,IGFBP2,IGFBP4,IGFBP5,IL18 (includes EG:16173),IL1A,IL1B,IL6,ITGB1,ITGB5,LDLR,LPAR1,LPAR2,LTA,MAPKAPK2,MET,MMP7,MMP9,MYC,NFE2L2,NGF,NOX1,NQO1,PDGFRB,PLAT,PLAU,PLAUR,POLDIP2,PROC,PTGER4,PTPRF,RAC1,RAMP2,RAMP3,S100A4,S…	69
Infectious Disease	replication	replication of HIV	9.20E-05	Increased	3.057	ACTL6B,AGFG1,APOBEC3B,ARNTL,BST2,CAPN3,CCL22,CCL5,CCNK,CCNT1,CD4,CIITA,CLDN3,CREB3,CTBP1,EPAS1,EXOSC5,FGF7,GALC,HCK,HOXA7,HTR4,IL1B,IL4 (includes EG:16189),IL6,IL8,LCK,MYC,NCOA3,NFKB1,NGF,NR2F1,NRF1,PIKFYVE,PLA2G10,PLD1,PLD2,PLIN3,PPP1R8,PRMT3,PSIP1,PTPRC,RAB11A,RAB9A,RABEPK,S100A12,S100A8,S100A9,SNX10,SOCS3,STXBP2,TGFB2,TGFB3,TLR2,TLR4,TLR8,TLR9,TNF,TNFSF10,TRIM5	60
Cell Cycle	interphase	arrest in interphase of connective tissue cells	9.26E-05			ABL1,ATF2,ATM,C11orf82,CCND1,CD247,CDC25C,CDKN1A,CHEK1,CHEK2,E2F1,E2F2,E2F3,E2F4,GADD45A,IGFBP7,MAP3K5,MAPK3,MBD4,MYBL2,MYC,NBN,PARP1,POLK,PRKDC,RB1,SMARCA2,SRSF2,TFDP1,TNF,TP53 (includes EG:22059),TPP2	32
Cardiovascular System Development and Function	dilation	dilation of left ventricle	9.26E-05		-0.549	ADCY5,ADRB2,BGN,BNIP3,CAV1,CAV3,CCNA2,DDC,EPO,F2R,FSTL3,GAB1,GAB2,GNAQ,KLF15,LMNA,MARCKSL1,MMP9,NOS1,PLAU,PPP3R1,PRDX3,PTGES,RHOA,ROCK1,SERPINE1,SLC2A1,SPEG,SPP1 (includes EG:20750),TGFBR2,TIMP1,TNF	32
Organ Morphology	dilation	dilation of left ventricle	9.26E-05		-0.549	ADCY5,ADRB2,BGN,BNIP3,CAV1,CAV3,CCNA2,DDC,EPO,F2R,FSTL3,GAB1,GAB2,GNAQ,KLF15,LMNA,MARCKSL1,MMP9,NOS1,PLAU,PPP3R1,PRDX3,PTGES,RHOA,ROCK1,SERPINE1,SLC2A1,SPEG,SPP1 (includes EG:20750),TGFBR2,TIMP1,TNF	32
Cellular Assembly and Organization	organization	organization of mitochondria	9.26E-05			ATP7A,BCS1L,CAV2,CLN8,COX10 (includes EG:1352),CXADR,DNAJA3,DNM1L,EPAS1,FANCG,FXN,GOLPH3,HMGCL,HTRA2,HTT,LONP1,MAN2A1,MSTO1,MTFP1,NRF1,OPA1,P2RX7,PEX5,PPARGC1A,PRDX3,PTCD2,RAB3A,SHARPIN,SLC22A5,SOD2,SPG7,TIMM50	32
Cellular Function and Maintenance	organization	organization of mitochondria	9.26E-05			ATP7A,BCS1L,CAV2,CLN8,COX10 (includes EG:1352),CXADR,DNAJA3,DNM1L,EPAS1,FANCG,FXN,GOLPH3,HMGCL,HTRA2,HTT,LONP1,MAN2A1,MSTO1,MTFP1,NRF1,OPA1,P2RX7,PEX5,PPARGC1A,PRDX3,PTCD2,RAB3A,SHARPIN,SLC22A5,SOD2,SPG7,TIMM50	32
Cell Death	cell death	cell death of B-lymphocyte derived cell lines	9.26E-05		-1.630	ABL1,BAK1,BCL2A1,BCL2L1,BCR,BIRC5,BMP2,CASP3,CASP8,CASP9 (includes EG:100140945),CBFB,CCND2,CD40,CD8A,CDKN1A,CDKN1B,CSF2,CSNK2A2,DAPK1,DAXX,EGFR,EPO,ETV6,FAIM,FAS,FGFR1,FIP1L1,FLT3,FOXO3,GATA1,GGT1,GHR,GRID2,HCLS1,HES1 (includes EG:15205),IL4 (includes EG:16189),IL6,INHBA,ITGA5,ITGB1,JAK2,KIT,KITLG,LCN2,MCL1,MERTK,MET,MYC,MYH11,MZB1,NBN,NGF,PDGFRB,PIK3R1,PIM1,PIM2,PLCE1,PRDM1,PRKCZ,PRL,PRLR,PTPN1…	81
Cellular Growth and Proliferation	proliferation	proliferation of tumor cells	9.26E-05		0.562	APC,ARRDC3,BAMBI,BECN1,BMP4,CASP3,CAV1,CD40,CSF2,CST3,CTSB,CTSS,CYR61,DCN,DOCK4,EGFR,EIF4EBP1,FGF2,FGFR1,FOS,FOXM1,HGF,HMMR,ID1,ID2,ID3 (includes EG:15903),IGF1R,IGF2,IL12A,IL15 (includes EG:16168),IL4 (includes EG:16189),IL6,IL7,ITGA1,JAG1,KCTD11,KDR,KITLG,KRAS,LPAR2,LTA,LZTS2,MAPK14,MMP9,MST1R,MTOR,MYC,NCOA6,NGF,NRP1 (includes EG:18186),NUMB,OSM,PARP1,PLAGL1,PLAUR,PLK1,POLL,POU3F2,PRKCD,PTCH1,P…	81
Tumor Morphology	proliferation	proliferation of tumor cells	9.26E-05		0.562	APC,ARRDC3,BAMBI,BECN1,BMP4,CASP3,CAV1,CD40,CSF2,CST3,CTSB,CTSS,CYR61,DCN,DOCK4,EGFR,EIF4EBP1,FGF2,FGFR1,FOS,FOXM1,HGF,HMMR,ID1,ID2,ID3 (includes EG:15903),IGF1R,IGF2,IL12A,IL15 (includes EG:16168),IL4 (includes EG:16189),IL6,IL7,ITGA1,JAG1,KCTD11,KDR,KITLG,KRAS,LPAR2,LTA,LZTS2,MAPK14,MMP9,MST1R,MTOR,MYC,NCOA6,NGF,NRP1 (includes EG:18186),NUMB,OSM,PARP1,PLAGL1,PLAUR,PLK1,POLL,POU3F2,PRKCD,PTCH1,P…	81
Cancer	B-cell non-Hodgkin's disease	B-cell non-Hodgkin's disease	9.41E-05		-0.868	ABCA7,ABL1,ADORA2A,AKT2,AKT3 (includes EG:10000),ATM,BCL10,BCL3,BCL6,BRD2,BTG1,BTG2,CARD11,CCND3,CCR7,CD247,CD3D,CD3E,CD3G,CD58,CDK2,CDK4,CDK6,CDK7,CFLAR,CIITA,COL4A2,CREBBP,CSF2RB,CSTF3,CXCR4,DCLRE1C,DHFR,DMTF1,DNMT3B,E2F1,EIF4E,EIF4EBP1,EPHA2,ETS1,ETV6,EZH2,FAS,FAT2,FKBP1A,FNTA,FNTB,FOXO1 (includes EG:2308),FOXP3,FYN,GART,GNA13,GSK3B,HDAC1,HDAC10,HDAC11,HDAC2,HDAC3,HDAC4,HDAC5,HDAC6,HDAC7,HDAC9…	123
Hematological Disease	B-cell non-Hodgkin's disease	B-cell non-Hodgkin's disease	9.41E-05		-0.868	ABCA7,ABL1,ADORA2A,AKT2,AKT3 (includes EG:10000),ATM,BCL10,BCL3,BCL6,BRD2,BTG1,BTG2,CARD11,CCND3,CCR7,CD247,CD3D,CD3E,CD3G,CD58,CDK2,CDK4,CDK6,CDK7,CFLAR,CIITA,COL4A2,CREBBP,CSF2RB,CSTF3,CXCR4,DCLRE1C,DHFR,DMTF1,DNMT3B,E2F1,EIF4E,EIF4EBP1,EPHA2,ETS1,ETV6,EZH2,FAS,FAT2,FKBP1A,FNTA,FNTB,FOXO1 (includes EG:2308),FOXP3,FYN,GART,GNA13,GSK3B,HDAC1,HDAC10,HDAC11,HDAC2,HDAC3,HDAC4,HDAC5,HDAC6,HDAC7,HDAC9…	123
Cellular Growth and Proliferation	growth	growth of leukocyte cell lines	9.77E-05		1.550	ABL1,ABL2,BCR,BLM,BMP2,BMX,BTK,CD40,CSF2,CSF2RB,EGFR,EPO,EPOR,ETV6,FCER1A,FGFR1,FLT3,FLT3LG,FOS,GADD45B,GADD45G,GATA1,GATA2,GHR,GRB10,GRID2,HIP1 (includes EG:176224),IL11RA,IL12RB1,IL1B,IL23A,IL23R,IL27RA,IL2RB,IL2RG,IL4 (includes EG:16189),IL6,IL6ST,INHBA,JAK2,JUN,KIT,KITLG,LIF,LIFR,LIG4,LYN,MAP2K1,MCL1,MCTS1,MET,MPL,MYC,OSM,OSMR,PDGFRB,PIM1,PML,PNPT1,SH2B3,SKP2 (includes EG:27401),SMAD6,SMAD7,S…	67
Cellular Development	growth	growth of leukocyte cell lines	9.77E-05		1.550	ABL1,ABL2,BCR,BLM,BMP2,BMX,BTK,CD40,CSF2,CSF2RB,EGFR,EPO,EPOR,ETV6,FCER1A,FGFR1,FLT3,FLT3LG,FOS,GADD45B,GADD45G,GATA1,GATA2,GHR,GRB10,GRID2,HIP1 (includes EG:176224),IL11RA,IL12RB1,IL1B,IL23A,IL23R,IL27RA,IL2RB,IL2RG,IL4 (includes EG:16189),IL6,IL6ST,INHBA,JAK2,JUN,KIT,KITLG,LIF,LIFR,LIG4,LYN,MAP2K1,MCL1,MCTS1,MET,MPL,MYC,OSM,OSMR,PDGFRB,PIM1,PML,PNPT1,SH2B3,SKP2 (includes EG:27401),SMAD6,SMAD7,S…	67
Hematological System Development and Function	growth	growth of leukocyte cell lines	9.77E-05		1.550	ABL1,ABL2,BCR,BLM,BMP2,BMX,BTK,CD40,CSF2,CSF2RB,EGFR,EPO,EPOR,ETV6,FCER1A,FGFR1,FLT3,FLT3LG,FOS,GADD45B,GADD45G,GATA1,GATA2,GHR,GRB10,GRID2,HIP1 (includes EG:176224),IL11RA,IL12RB1,IL1B,IL23A,IL23R,IL27RA,IL2RB,IL2RG,IL4 (includes EG:16189),IL6,IL6ST,INHBA,JAK2,JUN,KIT,KITLG,LIF,LIFR,LIG4,LYN,MAP2K1,MCL1,MCTS1,MET,MPL,MYC,OSM,OSMR,PDGFRB,PIM1,PML,PNPT1,SH2B3,SKP2 (includes EG:27401),SMAD6,SMAD7,S…	67
Dermatological Diseases and Conditions	dermatitis	dermatitis	9.79E-05		-1.485	ABCA1,ACADVL,ADRBK1,AHCY,AHNAK,ANXA5,ARCN1,ARFGAP3,ARIH1,ATM,BCL2L1,BGN,BLMH,BRF2,C3,CALR,CAMP,CAPG,CAPZB,CARD11,CAT,CCL17,CCL20,CCL22,CCL5,CCNA2,CCR4,CCR7,CCRL1,CD4,CDC25A,CDH1,CFL1,CHM,CHRNA7,COIL,CPNE7,CPVL,CSF2,CSF2RB,CST3,CST6 (includes EG:1474),CTSL1,CTSL2,CXCL9,CXCR4,CYP3A4,CYSLTR2,DDX41,DHFR,DPP4,DPYSL2,DSC1,DUSP1,DUSP10,EIF2AK2,EIF3E,ENO1,ENTPD4,F2RL1,FABP4,FADS2,FCER1A,FCER1G,FCGBP,FKBP…	241
Inflammatory Disease	dermatitis	dermatitis	9.79E-05		-1.485	ABCA1,ACADVL,ADRBK1,AHCY,AHNAK,ANXA5,ARCN1,ARFGAP3,ARIH1,ATM,BCL2L1,BGN,BLMH,BRF2,C3,CALR,CAMP,CAPG,CAPZB,CARD11,CAT,CCL17,CCL20,CCL22,CCL5,CCNA2,CCR4,CCR7,CCRL1,CD4,CDC25A,CDH1,CFL1,CHM,CHRNA7,COIL,CPNE7,CPVL,CSF2,CSF2RB,CST3,CST6 (includes EG:1474),CTSL1,CTSL2,CXCL9,CXCR4,CYP3A4,CYSLTR2,DDX41,DHFR,DPP4,DPYSL2,DSC1,DUSP1,DUSP10,EIF2AK2,EIF3E,ENO1,ENTPD4,F2RL1,FABP4,FADS2,FCER1A,FCER1G,FCGBP,FKBP…	241
Cellular Growth and Proliferation	growth	growth of bladder cancer cell lines	9.89E-05		-0.829	ARHGEF2,CDH1,CDKN1A,CXADR,FGF2,FGFR1,FGFR2,IGF2,LZTS1,NF2,PTEN,RALB,RB1,TP53 (includes EG:22059),TP73	15
Cellular Development	growth	growth of bladder cancer cell lines	9.89E-05		-0.829	ARHGEF2,CDH1,CDKN1A,CXADR,FGF2,FGFR1,FGFR2,IGF2,LZTS1,NF2,PTEN,RALB,RB1,TP53 (includes EG:22059),TP73	15
Cell Death	apoptosis	apoptosis of hematopoietic cells	9.92E-05		-0.071	ABL1,ADA,ADORA2A,ADRB1,AGER,AHSP,ATF7,ATM,BAK1,BCL2L1,BMP4,BRCA1,BTK,CASP2,CASP3,CASP8,CCL5,CD3E,CD59 (includes EG:25407),CDK2,CHEK1,CHEK2,CHUK,CRP,CSF2,CTNNB1,DFFA,DNASE2,E2F1,EBAG9,EGR1,EGR3,EPO,ETS2,FANCC,FAS,FCGR2B,FLI1,FOS,FYN,GATA1,GFI1B,GZMA,HIPK2,HIST1H1C,HOXA3,ID3 (includes EG:15903),IKBKB,IL6,IL7,JUN,KIFAP3,KITLG,LCN2,LGALS1,MAD1L1,MAP3K2,MAPK8,MAPK9,MECOM,MPL,MXD1,MYC,NFKBID,NQO1,NQO2,…	107
Neurological Disease	retinal degeneration	retinal degeneration	1.01E-04		0.201	ADRA1B,ADRA1D,ADRA2A,ADRA2B,ALDH5A1,APOE,ATXN7,BBS4,BMP4,C1QTNF5,C2,C3,CA1,CA12,CA13,CA14,CA2,CA3,CA4,CA5B,CA7,CA9,CABP4,CACNA1F,CACNA2D4,CDH23,CEP290,CFB,CHM,CHRNA1,CHRNA10,CHRNA5,CHRNA7,CHRNA9,CHRNB1,CHRNB2,CHRND,CHRNE,CHRNG,CLCN3,CLCN7,CNGA1,CNGB1,CP,CRB1,CSF1R,CST3,DICER1,EFEMP2,ELOVL4,ESR2,FBLN1,FBLN2,FBLN5,FGFR1,FGFR3,FKBP1A,FLT1,FSCN2,GAD2,GNAT1,GPR98,GUCA1B,GUCY2D,HMCN1,HTRA1,HTT,IFT88,IL…	118
Ophthalmic Disease	retinal degeneration	retinal degeneration	1.01E-04		0.201	ADRA1B,ADRA1D,ADRA2A,ADRA2B,ALDH5A1,APOE,ATXN7,BBS4,BMP4,C1QTNF5,C2,C3,CA1,CA12,CA13,CA14,CA2,CA3,CA4,CA5B,CA7,CA9,CABP4,CACNA1F,CACNA2D4,CDH23,CEP290,CFB,CHM,CHRNA1,CHRNA10,CHRNA5,CHRNA7,CHRNA9,CHRNB1,CHRNB2,CHRND,CHRNE,CHRNG,CLCN3,CLCN7,CNGA1,CNGB1,CP,CRB1,CSF1R,CST3,DICER1,EFEMP2,ELOVL4,ESR2,FBLN1,FBLN2,FBLN5,FGFR1,FGFR3,FKBP1A,FLT1,FSCN2,GAD2,GNAT1,GPR98,GUCA1B,GUCY2D,HMCN1,HTRA1,HTT,IFT88,IL…	118
Cell Death	cell death	cell death of cortical neurons	1.01E-04		0.220	ALOX15,APP,BAK1,BCL2L2,BDNF,CAPNS1,CASP2,CASP3,CASP8,CASP9 (includes EG:100140945),CDC25A,CDK4,CDK5,CDKN1A,CFLAR,CLU,CTSD,EPO,ETS2,FAIM,FAS,FCGR1A,GBA,GCLC,GCLM,GDNF,GNAO1,GSK3B,HIP1 (includes EG:176224),HTRA2,HTT,IL1B,IL1R1,IL1RN,ITSN1,JUN,KSR1,MAOA,MAP1B,MAPK14,NAIP,NCF1,NCS1,NFE2L2,NFKB1,NFKBIA,NGFR,NTF3,NTRK1,PAK1,PAK3,PARK7,PIN1,PLAT,PRNP,PROC,PSEN1,PTPN5,SERPINE1,SERPINI1,SH3GL2,SHC3,SIRT1,…	79
Cell Death	cell death	cell death of parenchymal cells	1.01E-04		0.410	AHR,ATF7,BAK1,C5,CASP3,CASP7,CASP8,CASP9 (includes EG:100140945),CD40,CDKN1A,CDKN1B,CHUK,CIT,CTSB,CYP7A1,DAXX,DDIT3,DICER1,EGFR,ENDOG,EPO,FAAH,FADD,FAS,FGL2,FOS,GADD45B,GSK3B,HGF,HMOX1,HSPA5,IKBKB,IL1RN,IL2RA,IL4 (includes EG:16189),IL6,INHA,IRF5,JUN,MAP2K1,MAPK8,MAPK9,MED1 (includes EG:19014),MET,MTOR,MYC,MYD88,NCF1,NFE2L2,NFKB1,NOS2,NR0B2,NR1H4,NR1I3,OSM,PIK3R1,PTGER1,PTPN1,RB1,RBCK1,SH3BP5,SLC…	79
Lipid Metabolism	metabolism	metabolism of sphingolipid	1.01E-04		1.214	ABCB1,ABCC1,ACER1,ADRBK1,AGK,ALDH5A1,APOA1,APP,ARV1 (includes EG:292097),ASAH1,B3GALT4,B3GNT5,B4GALNT1,B4GALT1,B4GALT6,BAK1,BCL2L1,CASP8,CD40,CD9,CEL,CERS1,CERS2,CERS4,CERS5,CERS6,CLN6,CLN8,COL4A3BP,DEGS2,EIF2AK3,FAS,GAL3ST1,GBA,GM2A,GNAI3,HEXA,HEXB,IL1B,IL24,ITGB8,KDSR,KIT,KITLG,LARGE,MAPK10,NEU3,NGF,NSMAF,OSBP,P2RX7,PARD3,PLA2G15,PPAP2A,PPT1,PSAP,SERINC1,SERINC2,SERINC3,SERINC5,SGMS1,SGMS2,SGPL…	79
Small Molecule Biochemistry	metabolism	metabolism of sphingolipid	1.01E-04		1.214	ABCB1,ABCC1,ACER1,ADRBK1,AGK,ALDH5A1,APOA1,APP,ARV1 (includes EG:292097),ASAH1,B3GALT4,B3GNT5,B4GALNT1,B4GALT1,B4GALT6,BAK1,BCL2L1,CASP8,CD40,CD9,CEL,CERS1,CERS2,CERS4,CERS5,CERS6,CLN6,CLN8,COL4A3BP,DEGS2,EIF2AK3,FAS,GAL3ST1,GBA,GM2A,GNAI3,HEXA,HEXB,IL1B,IL24,ITGB8,KDSR,KIT,KITLG,LARGE,MAPK10,NEU3,NGF,NSMAF,OSBP,P2RX7,PARD3,PLA2G15,PPAP2A,PPT1,PSAP,SERINC1,SERINC2,SERINC3,SERINC5,SGMS1,SGMS2,SGPL…	79
Organismal Functions	healing	healing	1.03E-04		0.962	ADORA2A,ADRB1,ADRB2,AIMP1,ALOX15,AQP1,B4GALT1,CAMP,CCR7,CNN2,COL3A1,CYR61,DCBLD2,DYSF,ELK3,ENG,F2,FGF2,FGF7,FHL2,FLT1,FNTB,FST,GJA1,GRHL3,GRN,HBEGF,HGF,HIF1A,HOPX,HPSE,IL18 (includes EG:16173),IL1RN,IL6,IL6R,IRS1,ITGB2,ITGB3,JUB,JUNB,LIMA1,LOX,MAP3K1,MAPK9,MET,MIA3,MMP9,MSX2,MT2A,MYC,NCOA6,NDN,NDST1,NFE2L2,NOG,NOTCH2,PAFAH2,PDGFA,PECAM1,PIK3C2B,PIK3CG,PLAT,PLAU,PLAUR,PLG,POU2F3,PPARA,PPARD,PRKCH,…	89
Gene Expression	expression	initiation of expression of RNA	1.06E-04		-0.694	BRF1 (includes EG:2972),CTIF,E2F2,E2F3,EIF2A,EIF2AK1,EIF2AK4,EIF2B1,EIF2B2,EIF2B3,EIF2B4,EIF2B5,EIF2C2,EIF2S2,EIF2S3,EIF3B,EIF3D,EIF3E,EIF3F,EIF3G,EIF3H,EIF3I,EIF3K,EIF3L,EIF4B,EIF4E,EIF4EBP1,EIF4EBP2,EIF4G2,EIF4G3,EIF5,ERCC3,FMR1,GTF2A2,GTF2I,GTF3C4,HSPB1,IMPACT,MED1 (includes EG:19014),MED12,MED13,MED17,MED23,MED24,MED26 (includes EG:306328),MED27,MED30,MED4 (includes EG:29079),MTIF2,MTIF3,MYC,…	72
Lipid Metabolism	production	production of acylglycerol	1.08E-04		1.042	ACSL5,ACSL6,ADRBK1,AGPAT2,AGPAT6,AGPAT9,ANG,APOE,BDKRB2,C3,CHRM1,CYP7A1,DAGLA,DGAT1,DGAT2,FASN,FITM2,GHR,GNAI3,GNRH1,GPAM,GPAT2,GPR77,HOMER2,HSD11B1,IL6,KIT,KITLG,LPL,MOG,MOGAT1,NR1H2,NR1H3,OPRK1,OSBP,P2RX7,PCTP,PDIA3,PLAU,PLCB1,PLCE1,PLD1,PLD2,PNPLA2,PNPLA3,PON2,PPAP2A,PPARG,RGS3,SLC27A1,SMPD1,SREBF1,THRSP,TNF	54
Small Molecule Biochemistry	production	production of acylglycerol	1.08E-04		1.042	ACSL5,ACSL6,ADRBK1,AGPAT2,AGPAT6,AGPAT9,ANG,APOE,BDKRB2,C3,CHRM1,CYP7A1,DAGLA,DGAT1,DGAT2,FASN,FITM2,GHR,GNAI3,GNRH1,GPAM,GPAT2,GPR77,HOMER2,HSD11B1,IL6,KIT,KITLG,LPL,MOG,MOGAT1,NR1H2,NR1H3,OPRK1,OSBP,P2RX7,PCTP,PDIA3,PLAU,PLCB1,PLCE1,PLD1,PLD2,PNPLA2,PNPLA3,PON2,PPAP2A,PPARG,RGS3,SLC27A1,SMPD1,SREBF1,THRSP,TNF	54
Tissue Morphology	quantity	quantity of bone cells	1.08E-04		-1.068	AHR,BGN,CAPN1,CAPNS1,CHUK,CREBBP,CSF1 (includes EG:12977),CTNNB1,CYP27B1,DCN,DICER1,F2R,FGF2,FLT3,FOS,FOSB,GGT1,GLP1R,HDC,HSD11B1,IL1A,IL1R1,IL1RN,IL23A,IL6ST,INPP5D,ITGB3,JUNB,KL,KREMEN1,LIF,LIMD1,MMP7,MSX2,NFKB1,NFKB2,NLK,NOG,NOS1,NOS2,NOS3,PAX5,PIK3CG,PLCL2,PPARG,PTH1R,PTHLH,SPARC,SPHK1,SPP1 (includes EG:20750),TNF,TNFRSF11A,TNFRSF11B,VDR	54
Connective Tissue Development and Function	quantity	quantity of bone cells	1.08E-04		-1.068	AHR,BGN,CAPN1,CAPNS1,CHUK,CREBBP,CSF1 (includes EG:12977),CTNNB1,CYP27B1,DCN,DICER1,F2R,FGF2,FLT3,FOS,FOSB,GGT1,GLP1R,HDC,HSD11B1,IL1A,IL1R1,IL1RN,IL23A,IL6ST,INPP5D,ITGB3,JUNB,KL,KREMEN1,LIF,LIMD1,MMP7,MSX2,NFKB1,NFKB2,NLK,NOG,NOS1,NOS2,NOS3,PAX5,PIK3CG,PLCL2,PPARG,PTH1R,PTHLH,SPARC,SPHK1,SPP1 (includes EG:20750),TNF,TNFRSF11A,TNFRSF11B,VDR	54
Cell Death	survival	survival of connective tissue cells	1.08E-04		0.085	ABCB6,ABCC1,ATG5 (includes EG:11793),ATM,BMP2,CASP3,CASP7,CASP9 (includes EG:100140945),CEBPD,CSF1 (includes EG:12977),EIF2AK3,EIF4E,F2,FANCC,FANCD2,FAS,GAB1,GRB2,IFIH1,IGF1R,IGF2,IL1A,IL1B,INPP5D,ITGB1,JUN,LTA,MAP3K1,MAP3K11,MBD4,MMP13,MMP9,MSX1,MVP,MYD88,NBN,OSM,PARP1,PLRG1,POU2F1,PPARG,PSEN1,PTAFR,PTPN11,RAC1,RAD52 (includes EG:19365),RCHY1,SIN3A,SLC31A1,TICAM1,TLR4,TNF,TP53 (includes EG:22059…	54
